# Supplementary material for: Mikan Genome Database (MiGD): integrated database of genome annotation, genomic diversity, and CAPS marker information for mandarin molecular breeding
Source: PubMed Central journal article supplement — Breed Sci. 2020 Mar 5;70(2):200–11. doi: 10.1270/jsbbs.19097 (PMC7272249; doi:10.1270/jsbbs.19097), 2020-03-05
Supplement: 70_200_s6.pdf [file 70_200_s6.pdf]

Supplemental Table S. *P. trifoliata* specific gene groups

| ID        | Num. in <i>C. clementina</i> | Num in <i>C. sinhu</i> | Num in <i>P.trifoliata</i> | Note                                                                                                                                                                                                            | GO                                                                                                                                                                                                                                                                                                                                                                                                                                    | InterPro                                                                                                                                                                                                                                  | Members in <i>C.clementina</i> | Members in <i>C.sinhu</i> | Members in <i>P.trifoliata</i>                                                                                                                                                                                                                                                                  |
|-----------|------------------------------|------------------------|----------------------------|-----------------------------------------------------------------------------------------------------------------------------------------------------------------------------------------------------------------|---------------------------------------------------------------------------------------------------------------------------------------------------------------------------------------------------------------------------------------------------------------------------------------------------------------------------------------------------------------------------------------------------------------------------------------|-------------------------------------------------------------------------------------------------------------------------------------------------------------------------------------------------------------------------------------------|--------------------------------|---------------------------|-------------------------------------------------------------------------------------------------------------------------------------------------------------------------------------------------------------------------------------------------------------------------------------------------|
| GF0000418 | 0                            | 0                      | 10                         | Hypothetical protein (10)                                                                                                                                                                                       |                                                                                                                                                                                                                                                                                                                                                                                                                                       |                                                                                                                                                                                                                                           |                                |                           | P_trifoliata_00022_mRNA_144.1.P_trifoliata_00047_mRNA_92.1.P_trifoliata_00047_mRNA_93.1.P_trifoliata_00047_mRNA_94.1.P_trifoliata_00047_mRNA_95.1.P_trifoliata_00047_mRNA_96.1.P_trifoliata_00047_mRNA_97.1.P_trifoliata_00057_mRNA_2.1.P_trifoliata_00057_mRNA_3.1.P_trifoliata_00257_mRNA_4.1 |
| GF0001731 | 0                            | 0                      | 6                          | Hypothetical protein (4); Protein FARI1 RELATED SEQUENCE 9 (1); Transposon-like element Lys2.0 DNA (1)                                                                                                          | regulation of transcription, DNA-templated [GO:0006355]; biological_process (6); zinc ion binding [GO:0008270 molecular_function] (5); nucleic acid binding [GO:0003676 molecular_function] (4)                                                                                                                                                                                                                                       | FHY3/FAR1 family [IPR011052] (6); Zinc finger, PMZ-type [IPR006564] (4); Zinc finger, SWIM-type [IPR007527] (4); Zinc finger, CCHC-type [IPR001878] (4); FARI DNA binding domain [IPR004330] (3); MULE transposase domain [IPR018289] (2) |                                |                           | P_trifoliata_00090_mRNA_1.1.P_trifoliata_00297_mRNA_10.1.P_trifoliata_00297_mRNA_91.P_trifoliata_00858_mRNA_2.1.P_trifoliata_01143_mRNA_1.1.P_trifoliata_01252_mRNA_3.1                                                                                                                         |
| GF0002682 | 0                            | 0                      | 5                          | Hypothetical protein (5)                                                                                                                                                                                        |                                                                                                                                                                                                                                                                                                                                                                                                                                       |                                                                                                                                                                                                                                           |                                |                           | P_trifoliata_00046_mRNA_3.1.P_trifoliata_00046_mRNA_5.1.P_trifoliata_00107_mRNA_48.1.P_trifoliata_00339_mRNA_24.1.P_trifoliata_00609_mRNA_2.1                                                                                                                                                   |
| GF0019481 | 0                            | 0                      | 3                          | ryponemata protein (1); Retrotransposon protein, putative, Ty1-virus subclass (1); FOG: Transposon-encoded proteins with TYA, reverse transcriptase, integrase domains in <i>Syntherisma cymbelliformis</i> (1) | nucleic acid binding [GO:0003676 molecular_function] (2); zinc ion binding [GO:0008270 molecular_function] (2)                                                                                                                                                                                                                                                                                                                        | Zinc finger, CCHC-type [IPR001878] (2)                                                                                                                                                                                                    |                                |                           | P_trifoliata_00023_mRNA_117.1.P_trifoliata_00377_mRNA_22.1.P_trifoliata_00600_mRNA_7.1                                                                                                                                                                                                          |
| GF0026133 | 0                            | 0                      | 2                          | Hypothetical protein (1); Early auxin response protein (1)                                                                                                                                                      | carboxylic acid metabolic process [GO:0019752 biological_process] (1); carboxyl-lyase activity [GO:0010883 molecular_function] (1); pyridoxal phosphate binding [GO:0030170 molecular_function] (1); catalytic activity [GO:0003824 molecular_function] (1)                                                                                                                                                                           | Pyridoxal phosphate-dependent transferase [IPR015424] (1); Pyridoxal phosphate-dependent decarboxylase [IPR002128] (1); Pyridoxal phosphate-dependent transferase, major region, subdomain 1 [IPR015421] (1)                              |                                |                           | P_trifoliata_00205_mRNA_44.1.P_trifoliata_01108_mRNA_2.1                                                                                                                                                                                                                                        |
| GF0026132 | 0                            | 0                      | 2                          | Hypothetical protein (2)                                                                                                                                                                                        |                                                                                                                                                                                                                                                                                                                                                                                                                                       |                                                                                                                                                                                                                                           |                                |                           | P_trifoliata_00129_mRNA_69.1.P_trifoliata_00892_mRNA_4.1                                                                                                                                                                                                                                        |
| GF0051614 | 0                            | 0                      | 1                          | F-box protein SKIP22 (1)                                                                                                                                                                                        | protein binding [GO:0005515 molecular_function] (1)                                                                                                                                                                                                                                                                                                                                                                                   | F-box domain [IPR001810] (1)                                                                                                                                                                                                              |                                |                           | P_trifoliata_01311_mRNA_1.1                                                                                                                                                                                                                                                                     |
| GF0051613 | 0                            | 0                      | 1                          | Hypothetical protein (1)                                                                                                                                                                                        | DNA binding [GO:0003677 molecular_function] (1)                                                                                                                                                                                                                                                                                                                                                                                       | B3 DNA binding domain [IPR003340] (1); DNA-binding pseudobarel domain [IPR015309] (1)                                                                                                                                                     |                                |                           | P_trifoliata_01306_mRNA_1.1                                                                                                                                                                                                                                                                     |
| GF0051612 | 0                            | 0                      | 1                          | Hypothetical protein (1)                                                                                                                                                                                        |                                                                                                                                                                                                                                                                                                                                                                                                                                       |                                                                                                                                                                                                                                           |                                |                           | P_trifoliata_01305_mRNA_1.1                                                                                                                                                                                                                                                                     |
| GF0051611 | 0                            | 0                      | 1                          | Receptor like protein 9 (1)                                                                                                                                                                                     | protein binding [GO:0005515 molecular_function] (1)                                                                                                                                                                                                                                                                                                                                                                                   | Leucine-rich repeat domain, L domain-like [IPR032675] (1); Leucine rich repeat 4 [IPR025875] (1); Leucine-rich repeat [IPR001611] (1)                                                                                                     |                                |                           | P_trifoliata_01304_mRNA_1.1                                                                                                                                                                                                                                                                     |
| GF0051610 | 0                            | 0                      | 1                          | Hypothetical protein (1)                                                                                                                                                                                        |                                                                                                                                                                                                                                                                                                                                                                                                                                       |                                                                                                                                                                                                                                           |                                |                           | P_trifoliata_01303_mRNA_1.1                                                                                                                                                                                                                                                                     |
| GF0051609 | 0                            | 0                      | 1                          | Hypothetical protein (1)                                                                                                                                                                                        |                                                                                                                                                                                                                                                                                                                                                                                                                                       |                                                                                                                                                                                                                                           |                                |                           | P_trifoliata_01302_mRNA_1.1                                                                                                                                                                                                                                                                     |
| GF0051608 | 0                            | 0                      | 1                          | Acetolactate synthase small subunit (1)                                                                                                                                                                         | branched-chain amino acid biosynthetic process [GO:0009082]; biological_process (1); acetolactate synthase activity [GO:0003984 molecular_function] (1); metabolic process [GO:0008152 biological_process] (1); amino acid binding [GO:0016597 molecular_function] (1)                                                                                                                                                                | Acetolactate synthase, small subunit [IPR004799] (1); Acetolactate synthase, small subunit, C-terminal [IPR019455] (1); ACT domain [IPR002912] (1)                                                                                        |                                |                           | P_trifoliata_01301_mRNA_1.1                                                                                                                                                                                                                                                                     |
| GF0051607 | 0                            | 0                      | 1                          | Hypothetical protein (1)                                                                                                                                                                                        |                                                                                                                                                                                                                                                                                                                                                                                                                                       |                                                                                                                                                                                                                                           |                                |                           | P_trifoliata_01300_mRNA_2.1                                                                                                                                                                                                                                                                     |
| GF0051606 | 0                            | 0                      | 1                          | Hypothetical protein (1)                                                                                                                                                                                        |                                                                                                                                                                                                                                                                                                                                                                                                                                       |                                                                                                                                                                                                                                           |                                |                           | P_trifoliata_01300_mRNA_1.1                                                                                                                                                                                                                                                                     |
| GF0051605 | 0                            | 0                      | 1                          | Hypothetical protein (1)                                                                                                                                                                                        |                                                                                                                                                                                                                                                                                                                                                                                                                                       |                                                                                                                                                                                                                                           |                                |                           | P_trifoliata_01298_mRNA_1.1                                                                                                                                                                                                                                                                     |
| GF0051604 | 0                            | 0                      | 1                          | Hypothetical protein (1)                                                                                                                                                                                        |                                                                                                                                                                                                                                                                                                                                                                                                                                       | Glutathione S-transferase, C-terminal-like [IPR010987] (1)                                                                                                                                                                                |                                |                           | P_trifoliata_01296_mRNA_2.1                                                                                                                                                                                                                                                                     |
| GF0051603 | 0                            | 0                      | 1                          | Hypothetical protein (1)                                                                                                                                                                                        |                                                                                                                                                                                                                                                                                                                                                                                                                                       |                                                                                                                                                                                                                                           |                                |                           | P_trifoliata_01296_mRNA_1.1                                                                                                                                                                                                                                                                     |
| GF0051602 | 0                            | 0                      | 1                          | Hypothetical protein (1)                                                                                                                                                                                        |                                                                                                                                                                                                                                                                                                                                                                                                                                       |                                                                                                                                                                                                                                           |                                |                           | P_trifoliata_01294_mRNA_1.1                                                                                                                                                                                                                                                                     |
| GF0051601 | 0                            | 0                      | 1                          | Hypothetical protein (1)                                                                                                                                                                                        |                                                                                                                                                                                                                                                                                                                                                                                                                                       |                                                                                                                                                                                                                                           |                                |                           | P_trifoliata_01291_mRNA_2.1                                                                                                                                                                                                                                                                     |
| GF0051600 | 0                            | 0                      | 1                          | Hypothetical protein (1)                                                                                                                                                                                        |                                                                                                                                                                                                                                                                                                                                                                                                                                       |                                                                                                                                                                                                                                           |                                |                           | P_trifoliata_01291_mRNA_1.1                                                                                                                                                                                                                                                                     |
| GF0051599 | 0                            | 0                      | 1                          | Hypothetical protein (1)                                                                                                                                                                                        |                                                                                                                                                                                                                                                                                                                                                                                                                                       |                                                                                                                                                                                                                                           |                                |                           | P_trifoliata_01289_mRNA_2.1                                                                                                                                                                                                                                                                     |
| GF0051598 | 0                            | 0                      | 1                          | Hypothetical protein (1)                                                                                                                                                                                        |                                                                                                                                                                                                                                                                                                                                                                                                                                       | Viral movement protein [IPR028919] (1)                                                                                                                                                                                                    |                                |                           | P_trifoliata_01289_mRNA_1.1                                                                                                                                                                                                                                                                     |
| GF0051597 | 0                            | 0                      | 1                          | Hypothetical protein (1)                                                                                                                                                                                        | protein binding [GO:0005515 molecular_function] (1)                                                                                                                                                                                                                                                                                                                                                                                   | SET domain [IPR001214] (1)                                                                                                                                                                                                                |                                |                           | P_trifoliata_01286_mRNA_1.1                                                                                                                                                                                                                                                                     |
| GF0051596 | 0                            | 0                      | 1                          | Hypothetical protein (1)                                                                                                                                                                                        |                                                                                                                                                                                                                                                                                                                                                                                                                                       |                                                                                                                                                                                                                                           |                                |                           | P_trifoliata_01285_mRNA_2.1                                                                                                                                                                                                                                                                     |
| GF0051595 | 0                            | 0                      | 1                          | Hypothetical protein (1)                                                                                                                                                                                        |                                                                                                                                                                                                                                                                                                                                                                                                                                       |                                                                                                                                                                                                                                           |                                |                           | P_trifoliata_01281_mRNA_1.1                                                                                                                                                                                                                                                                     |
| GF0051594 | 0                            | 0                      | 1                          | Hypothetical protein (1)                                                                                                                                                                                        | enzyme activator activity [GO:0008047 molecular_function] (1); positive regulation of catalytic activity [GO:0043085 biological_process] (1); decarboxylation-dependent cleaving of nuclear-transcribed mRNA [GO:0000290 biological_process] (1)                                                                                                                                                                                      | mRNA-decapping enzyme subunit 1 [IPR010334] (1)                                                                                                                                                                                           |                                |                           | P_trifoliata_01279_mRNA_2.1                                                                                                                                                                                                                                                                     |
| GF0051593 | 0                            | 0                      | 1                          | Hypothetical protein (1)                                                                                                                                                                                        |                                                                                                                                                                                                                                                                                                                                                                                                                                       |                                                                                                                                                                                                                                           |                                |                           | P_trifoliata_01274_mRNA_2.1                                                                                                                                                                                                                                                                     |
| GF0051592 | 0                            | 0                      | 1                          | Hypothetical protein (1)                                                                                                                                                                                        |                                                                                                                                                                                                                                                                                                                                                                                                                                       |                                                                                                                                                                                                                                           |                                |                           | P_trifoliata_01271_mRNA_1.1                                                                                                                                                                                                                                                                     |
| GF0051591 | 0                            | 0                      | 1                          | Hypothetical protein (1)                                                                                                                                                                                        |                                                                                                                                                                                                                                                                                                                                                                                                                                       |                                                                                                                                                                                                                                           |                                |                           | P_trifoliata_01270_mRNA_2.1                                                                                                                                                                                                                                                                     |
| GF0051590 | 0                            | 0                      | 1                          | Hypothetical protein (1)                                                                                                                                                                                        |                                                                                                                                                                                                                                                                                                                                                                                                                                       |                                                                                                                                                                                                                                           |                                |                           | P_trifoliata_01265_mRNA_1.1                                                                                                                                                                                                                                                                     |
| GF0051589 | 0                            | 0                      | 1                          | Hypothetical protein (1)                                                                                                                                                                                        |                                                                                                                                                                                                                                                                                                                                                                                                                                       |                                                                                                                                                                                                                                           |                                |                           | P_trifoliata_01264_mRNA_3.1                                                                                                                                                                                                                                                                     |
| GF0051588 | 0                            | 0                      | 1                          | Hypothetical protein (1)                                                                                                                                                                                        |                                                                                                                                                                                                                                                                                                                                                                                                                                       |                                                                                                                                                                                                                                           |                                |                           | P_trifoliata_01264_mRNA_2.1                                                                                                                                                                                                                                                                     |
| GF0051587 | 0                            | 0                      | 1                          | Hypothetical protein (1)                                                                                                                                                                                        |                                                                                                                                                                                                                                                                                                                                                                                                                                       |                                                                                                                                                                                                                                           |                                |                           | P_trifoliata_01261_mRNA_1.1                                                                                                                                                                                                                                                                     |
| GF0051586 | 0                            | 0                      | 1                          | Hypothetical protein (1)                                                                                                                                                                                        | enzyme inhibitor activity [GO:0004857 molecular_function] (1)                                                                                                                                                                                                                                                                                                                                                                         | Pectinesterase inhibitor domain [IPR006501] (1)                                                                                                                                                                                           |                                |                           | P_trifoliata_01257_mRNA_3.1                                                                                                                                                                                                                                                                     |
| GF0051585 | 0                            | 0                      | 1                          | Putative disease resistance protein RGA1 (1)                                                                                                                                                                    |                                                                                                                                                                                                                                                                                                                                                                                                                                       | Leucine-rich repeat domain, L domain-like [IPR032675] (1)                                                                                                                                                                                 |                                |                           | P_trifoliata_01257_mRNA_2.1                                                                                                                                                                                                                                                                     |
| GF0051584 | 0                            | 0                      | 1                          | Hypothetical protein (1)                                                                                                                                                                                        |                                                                                                                                                                                                                                                                                                                                                                                                                                       |                                                                                                                                                                                                                                           |                                |                           | P_trifoliata_01257_mRNA_1.1                                                                                                                                                                                                                                                                     |
| GF0051583 | 0                            | 0                      | 1                          | Hypothetical protein (1)                                                                                                                                                                                        |                                                                                                                                                                                                                                                                                                                                                                                                                                       |                                                                                                                                                                                                                                           |                                |                           | P_trifoliata_01254_mRNA_1.1                                                                                                                                                                                                                                                                     |
| GF0051582 | 0                            | 0                      | 1                          | Hypothetical protein (1)                                                                                                                                                                                        | proteolysis [GO:0006508 biological_process] (1); cysteine-type peptidase activity [GO:0008234 molecular_function] (1)                                                                                                                                                                                                                                                                                                                 | Ulp1 protease family, C-terminal catalytic domain [IPR005653] (1); High mobility group box domain [IPR009071] (1)                                                                                                                         |                                |                           | P_trifoliata_01252_mRNA_2.1                                                                                                                                                                                                                                                                     |
| GF0051581 | 0                            | 0                      | 1                          | Hypothetical protein (1)                                                                                                                                                                                        |                                                                                                                                                                                                                                                                                                                                                                                                                                       |                                                                                                                                                                                                                                           |                                |                           | P_trifoliata_01251_mRNA_3.1                                                                                                                                                                                                                                                                     |
| GF0051580 | 0                            | 0                      | 1                          | Hypothetical protein (1)                                                                                                                                                                                        |                                                                                                                                                                                                                                                                                                                                                                                                                                       |                                                                                                                                                                                                                                           |                                |                           | P_trifoliata_01251_mRNA_2.1                                                                                                                                                                                                                                                                     |
| GF0051579 | 0                            | 0                      | 1                          | Hypothetical protein (1)                                                                                                                                                                                        |                                                                                                                                                                                                                                                                                                                                                                                                                                       |                                                                                                                                                                                                                                           |                                |                           | P_trifoliata_01251_mRNA_1.1                                                                                                                                                                                                                                                                     |
| GF0051578 | 0                            | 0                      | 1                          | Cytochrome c oxidase subunit 1 (1)                                                                                                                                                                              | oxidation-reduction process [GO:005114 biological_process] (1); aerobic respiration [GO:0009060 biological_process] (1); cytochrome-c oxidase activity [GO:0004129 molecular_function] (1); electron carrier activity [GO:0009055 molecular_function] (1); iron ion binding [GO:0005506 molecular_function] (1); integral component of membrane [GO:0016021 cellular_component] (1); heme binding [GO:0020037 molecular_function] (1) | Cytochrome c oxidase subunit 1 [IPR000883] (1); Cytochrome c oxidase, subunit 1 domain [IPR023616] (1)                                                                                                                                    |                                |                           | P_trifoliata_01249_mRNA_1.1                                                                                                                                                                                                                                                                     |
| GF0051577 | 0                            | 0                      | 1                          | Hypothetical protein (1)                                                                                                                                                                                        |                                                                                                                                                                                                                                                                                                                                                                                                                                       |                                                                                                                                                                                                                                           |                                |                           | P_trifoliata_01243_mRNA_4.1                                                                                                                                                                                                                                                                     |
| GF0051576 | 0                            | 0                      | 1                          | Hypothetical protein (1)                                                                                                                                                                                        |                                                                                                                                                                                                                                                                                                                                                                                                                                       |                                                                                                                                                                                                                                           |                                |                           | P_trifoliata_01241_mRNA_1.1                                                                                                                                                                                                                                                                     |
| GF0051575 | 0                            | 0                      | 1                          | Hypothetical protein (1)                                                                                                                                                                                        |                                                                                                                                                                                                                                                                                                                                                                                                                                       |                                                                                                                                                                                                                                           |                                |                           | P_trifoliata_01237_mRNA_6.1                                                                                                                                                                                                                                                                     |
| GF0051574 | 0                            | 0                      | 1                          | Cytochrome P450 86A1 (1)                                                                                                                                                                                        | oxidation-reduction process [GO:005114 biological_process] (1); oxidoreductase activity, acting on paired donors, with incorporation or reduction of molecular oxygen [GO:0016705 molecular_function] (1); iron ion binding [GO:0005506 molecular_function] (1); heme binding [GO:0020037 molecular_function] (1)                                                                                                                     | Cytochrome P450, conserved site [IPR017972] (1); Cytochrome P450, E-class, group 1 [IPR024011] (1); Cytochrome P450 [IPR001128] (1)                                                                                                       |                                |                           | P_trifoliata_01237_mRNA_5.1                                                                                                                                                                                                                                                                     |
| GF0051573 | 0                            | 0                      | 1                          | Cytochrome P450 (1)                                                                                                                                                                                             | oxidation-reduction process [GO:005114 biological_process] (1); oxidoreductase activity, acting on paired donors, with incorporation or reduction of molecular oxygen [GO:0016705 molecular_function] (1); oxidation-reduction process [GO:005114 biological_process] (1)                                                                                                                                                             | Cytochrome P450 [IPR001128] (1)                                                                                                                                                                                                           |                                |                           | P_trifoliata_01237_mRNA_4.1                                                                                                                                                                                                                                                                     |
| GF0051572 | 0                            | 0                      | 1                          | Cytochrome P450 86A1 (1)                                                                                                                                                                                        | oxidation-reduction process [GO:005114 biological_process] (1); oxidoreductase activity, acting on paired donors, with incorporation or reduction of molecular oxygen [GO:0016705 molecular_function] (1); heme binding [GO:0020037 molecular_function] (1); iron ion binding [GO:0005506 molecular_function] (1)                                                                                                                     | Cytochrome P450 [IPR001128] (1)                                                                                                                                                                                                           |                                |                           | P_trifoliata_01237_mRNA_3.1                                                                                                                                                                                                                                                                     |

| ID        | Num. in <i>C. clementiae</i> | Num. in <i>C. canthii</i> | Num. in <i>P. trifolium</i> | Note                                      | GO                                                                                                                                                                                                                                                                                                                | InterPro                                                                                                                                                                                                                  | Members in <i>C. clementiae</i> | Members in <i>C. canthii</i> | Members in <i>P. trifolium</i> |
|-----------|------------------------------|---------------------------|-----------------------------|-------------------------------------------|-------------------------------------------------------------------------------------------------------------------------------------------------------------------------------------------------------------------------------------------------------------------------------------------------------------------|---------------------------------------------------------------------------------------------------------------------------------------------------------------------------------------------------------------------------|---------------------------------|------------------------------|--------------------------------|
| GF0051571 | 0                            | 0                         | 1                           | Cytochrome P450 family protein (1)        | oxidation-reduction process [GO:005114 biological_process] (1); oxidoreductase activity, acting on paired donors, with incorporation or reduction of molecular oxygen [GO:0016705 molecular_function] (1); heme binding [GO:0020037 molecular_function] (1); iron ion binding [GO:0005506 molecular_function] (1) | Cytochrome P450, E-class, group I [IPR02401] (1); Cytochrome P450, conserved site [IPR017972] (1); Cytochrome P450 [IPR001128] (1)                                                                                        | -                               | -                            | P_trifoliata_01237_miRNA_2,1   |
| GF0051570 | 0                            | 0                         | 1                           | Hypothetical protein (1)                  |                                                                                                                                                                                                                                                                                                                   |                                                                                                                                                                                                                           | -                               | -                            | P_trifoliata_01236_miRNA_1,1   |
| GF0051569 | 0                            | 0                         | 1                           | Hypothetical protein (1)                  |                                                                                                                                                                                                                                                                                                                   |                                                                                                                                                                                                                           | -                               | -                            | P_trifoliata_01234_miRNA_2,1   |
| GF0051568 | 0                            | 0                         | 1                           | Hypothetical protein (1)                  |                                                                                                                                                                                                                                                                                                                   |                                                                                                                                                                                                                           | -                               | -                            | P_trifoliata_01233_miRNA_1,1   |
| GF0051567 | 0                            | 0                         | 1                           | Hypothetical protein (1)                  | protein binding [GO:0005515 molecular_function] (1)                                                                                                                                                                                                                                                               | Leucine-rich repeat [IPR001611] (1); P-loop containing nucleoside triphosphate hydrolase [IPR027417] (1); Leucine-rich repeat domain, L domain-like [IPR032675] (1); Leucine-rich repeat, typical subtype [IPR003591] (1) | -                               | -                            | P_trifoliata_01231_miRNA_1,1   |
| GF0051566 | 0                            | 0                         | 1                           | Hypothetical protein (1)                  |                                                                                                                                                                                                                                                                                                                   |                                                                                                                                                                                                                           | -                               | -                            | P_trifoliata_01227_miRNA_3,1   |
| GF0051565 | 0                            | 0                         | 1                           | Hypothetical protein (1)                  |                                                                                                                                                                                                                                                                                                                   |                                                                                                                                                                                                                           | -                               | -                            | P_trifoliata_01227_miRNA_1,1   |
| GF0051564 | 0                            | 0                         | 1                           | Hypothetical protein (1)                  | endoplasmic reticulum [GO:0005783 cellular_component] (1); integral component of membrane [GO:0016021 cellular_component] (1)                                                                                                                                                                                     | Translocon-associated protein subunit beta [IPR008856] (1)                                                                                                                                                                | -                               | -                            | P_trifoliata_01225_miRNA_2,1   |
| GF0051563 | 0                            | 0                         | 1                           | Hypothetical protein (1)                  |                                                                                                                                                                                                                                                                                                                   |                                                                                                                                                                                                                           | -                               | -                            | P_trifoliata_01225_miRNA_1,1   |
| GF0051562 | 0                            | 0                         | 1                           | Hypothetical protein (1)                  |                                                                                                                                                                                                                                                                                                                   |                                                                                                                                                                                                                           | -                               | -                            | P_trifoliata_01223_miRNA_1,1   |
| GF0051561 | 0                            | 0                         | 1                           | Hypothetical protein (1)                  |                                                                                                                                                                                                                                                                                                                   |                                                                                                                                                                                                                           | -                               | -                            | P_trifoliata_01222_miRNA_2,1   |
| GF0051560 | 0                            | 0                         | 1                           | Hypothetical protein (1)                  |                                                                                                                                                                                                                                                                                                                   |                                                                                                                                                                                                                           | -                               | -                            | P_trifoliata_01222_miRNA_1,1   |
| GF0051559 | 0                            | 0                         | 1                           | Hypothetical protein (1)                  | unfolded protein binding [GO:0051082 cellular_function] (1); protein folding [GO:0006457 biological_process] (1)                                                                                                                                                                                                  | Chaperone DnaJ, C-terminal [IPR002939] (1); HSP90/DnaJ peptide-binding [IPR008971] (1)                                                                                                                                    | -                               | -                            | P_trifoliata_01220_miRNA_1,1   |
| GF0051558 | 0                            | 0                         | 1                           | Hypothetical protein (1)                  | Coiled-coil domain-containing protein 97 isoform 1 (1)                                                                                                                                                                                                                                                            | Protein of unknown function DUF2052, coiled-coil [IPR018613] (1)                                                                                                                                                          | -                               | -                            | P_trifoliata_01219_miRNA_2,1   |
| GF0051557 | 0                            | 0                         | 1                           | Hypothetical protein (1)                  |                                                                                                                                                                                                                                                                                                                   |                                                                                                                                                                                                                           | -                               | -                            | P_trifoliata_01218_miRNA_2,1   |
| GF0051556 | 0                            | 0                         | 1                           | Hypothetical protein (1)                  |                                                                                                                                                                                                                                                                                                                   |                                                                                                                                                                                                                           | -                               | -                            | P_trifoliata_01216_miRNA_3,1   |
| GF0051555 | 0                            | 0                         | 1                           | Hypothetical protein (1)                  |                                                                                                                                                                                                                                                                                                                   |                                                                                                                                                                                                                           | -                               | -                            | P_trifoliata_01216_miRNA_2,1   |
| GF0051554 | 0                            | 0                         | 1                           | Hypothetical protein (1)                  |                                                                                                                                                                                                                                                                                                                   |                                                                                                                                                                                                                           | -                               | -                            | P_trifoliata_01215_miRNA_2,1   |
| GF0051553 | 0                            | 0                         | 1                           | Hypothetical protein (1)                  |                                                                                                                                                                                                                                                                                                                   |                                                                                                                                                                                                                           | -                               | -                            | P_trifoliata_01214_miRNA_2,1   |
| GF0051552 | 0                            | 0                         | 1                           | Hypothetical protein (1)                  |                                                                                                                                                                                                                                                                                                                   |                                                                                                                                                                                                                           | -                               | -                            | P_trifoliata_01213_miRNA_2,1   |
| GF0051551 | 0                            | 0                         | 1                           | Hypothetical protein (1)                  |                                                                                                                                                                                                                                                                                                                   |                                                                                                                                                                                                                           | -                               | -                            | P_trifoliata_01207_miRNA_2,1   |
| GF0051550 | 0                            | 0                         | 1                           | Hypothetical protein (1)                  |                                                                                                                                                                                                                                                                                                                   |                                                                                                                                                                                                                           | -                               | -                            | P_trifoliata_01206_miRNA_3,1   |
| GF0051549 | 0                            | 0                         | 1                           | Hypothetical protein (1)                  |                                                                                                                                                                                                                                                                                                                   |                                                                                                                                                                                                                           | -                               | -                            | P_trifoliata_01203_miRNA_4,1   |
| GF0051548 | 0                            | 0                         | 1                           | Hypothetical protein (1)                  |                                                                                                                                                                                                                                                                                                                   |                                                                                                                                                                                                                           | -                               | -                            | P_trifoliata_01203_miRNA_3,1   |
| GF0051547 | 0                            | 0                         | 1                           | Hypothetical protein (1)                  |                                                                                                                                                                                                                                                                                                                   |                                                                                                                                                                                                                           | -                               | -                            | P_trifoliata_01203_miRNA_2,1   |
| GF0051546 | 0                            | 0                         | 1                           | Hypothetical protein (1)                  |                                                                                                                                                                                                                                                                                                                   |                                                                                                                                                                                                                           | -                               | -                            | P_trifoliata_01203_miRNA_1,1   |
| GF0051545 | 0                            | 0                         | 1                           | Hypothetical protein (1)                  |                                                                                                                                                                                                                                                                                                                   |                                                                                                                                                                                                                           | -                               | -                            | P_trifoliata_01202_miRNA_1,1   |
| GF0051544 | 0                            | 0                         | 1                           | Hypothetical protein (1)                  |                                                                                                                                                                                                                                                                                                                   |                                                                                                                                                                                                                           | -                               | -                            | P_trifoliata_01201_miRNA_2,1   |
| GF0051543 | 0                            | 0                         | 1                           | Hypothetical protein (1)                  |                                                                                                                                                                                                                                                                                                                   |                                                                                                                                                                                                                           | -                               | -                            | P_trifoliata_01201_miRNA_1,1   |
| GF0051542 | 0                            | 0                         | 1                           | Hypothetical protein (1)                  |                                                                                                                                                                                                                                                                                                                   |                                                                                                                                                                                                                           | -                               | -                            | P_trifoliata_01200_miRNA_2,1   |
| GF0051541 | 0                            | 0                         | 1                           | Hypothetical protein (1)                  |                                                                                                                                                                                                                                                                                                                   |                                                                                                                                                                                                                           | -                               | -                            | P_trifoliata_01200_miRNA_1,1   |
| GF0051540 | 0                            | 0                         | 1                           | Hypothetical protein (1)                  |                                                                                                                                                                                                                                                                                                                   | Plant self-incompatibility S1 [IPR010264] (1)                                                                                                                                                                             | -                               | -                            | P_trifoliata_01199_miRNA_2,1   |
| GF0051539 | 0                            | 0                         | 1                           | Hypothetical protein (1)                  |                                                                                                                                                                                                                                                                                                                   |                                                                                                                                                                                                                           | -                               | -                            | P_trifoliata_01197_miRNA_1,1   |
| GF0051538 | 0                            | 0                         | 1                           | Hypothetical protein (1)                  | protein binding [GO:0005515 molecular_function] (1)                                                                                                                                                                                                                                                               | Leucine-rich repeat domain, L domain-like [IPR032675] (1); Leucine-rich repeat, typical subtype [IPR003591] (1); Leucine-rich repeat [IPR001611] (1)                                                                      | -                               | -                            | P_trifoliata_01196_miRNA_2,1   |
| GF0051537 | 0                            | 0                         | 1                           | Hypothetical protein (1)                  | condensin complex [GO:0000796 cellular_component] (1); mitotic chromosome condensation [GO:0007076 biological_process] (1)                                                                                                                                                                                        | Structural maintenance of chromosomes Smc2 [IPR027120] (1); RecF/RecN/SMC, N-terminal rrm001303 (1)                                                                                                                       | -                               | -                            | P_trifoliata_01196_miRNA_1,1   |
| GF0051536 | 0                            | 0                         | 1                           | Hypothetical protein (1)                  |                                                                                                                                                                                                                                                                                                                   | Double-stranded RNA-binding domain [IPR014720] (1)                                                                                                                                                                        | -                               | -                            | P_trifoliata_01195_miRNA_4,1   |
| GF0051535 | 0                            | 0                         | 1                           | Hypothetical protein (1)                  |                                                                                                                                                                                                                                                                                                                   |                                                                                                                                                                                                                           | -                               | -                            | P_trifoliata_01192_miRNA_2,1   |
| GF0051534 | 0                            | 0                         | 1                           | Hypothetical protein (1)                  |                                                                                                                                                                                                                                                                                                                   | Acetyltransferase cytidyltransferase [IPR003229] (1); Nucleoside-diphosphate sugar transferases [IPR029044] (1)                                                                                                           | -                               | -                            | P_trifoliata_01192_miRNA_1,1   |
| GF0051533 | 0                            | 0                         | 1                           | Hypothetical protein (1)                  |                                                                                                                                                                                                                                                                                                                   |                                                                                                                                                                                                                           | -                               | -                            | P_trifoliata_01191_miRNA_6,1   |
| GF0051532 | 0                            | 0                         | 1                           | Hypothetical protein (1)                  |                                                                                                                                                                                                                                                                                                                   |                                                                                                                                                                                                                           | -                               | -                            | P_trifoliata_01191_miRNA_5,1   |
| GF0051531 | 0                            | 0                         | 1                           | Hypothetical protein (1)                  |                                                                                                                                                                                                                                                                                                                   |                                                                                                                                                                                                                           | -                               | -                            | P_trifoliata_01190_miRNA_3,1   |
| GF0051530 | 0                            | 0                         | 1                           | Hypothetical protein (1)                  |                                                                                                                                                                                                                                                                                                                   |                                                                                                                                                                                                                           | -                               | -                            | P_trifoliata_01190_miRNA_2,1   |
| GF0051529 | 0                            | 0                         | 1                           | Hypothetical protein (1)                  |                                                                                                                                                                                                                                                                                                                   |                                                                                                                                                                                                                           | -                               | -                            | P_trifoliata_01190_miRNA_1,1   |
| GF0051528 | 0                            | 0                         | 1                           | Hypothetical protein (1)                  |                                                                                                                                                                                                                                                                                                                   |                                                                                                                                                                                                                           | -                               | -                            | P_trifoliata_01189_miRNA_5,1   |
| GF0051527 | 0                            | 0                         | 1                           | Hypothetical protein (1)                  |                                                                                                                                                                                                                                                                                                                   |                                                                                                                                                                                                                           | -                               | -                            | P_trifoliata_01189_miRNA_3,1   |
| GF0051526 | 0                            | 0                         | 1                           | Hypothetical protein (1)                  |                                                                                                                                                                                                                                                                                                                   |                                                                                                                                                                                                                           | -                               | -                            | P_trifoliata_01189_miRNA_1,1   |
| GF0051525 | 0                            | 0                         | 1                           | Hypothetical protein (1)                  |                                                                                                                                                                                                                                                                                                                   | Cysteine-rich flanking region, C-terminal [IPR000483] (1)                                                                                                                                                                 | -                               | -                            | P_trifoliata_01186_miRNA_2,1   |
| GF0051524 | 0                            | 0                         | 1                           | WD repeat-containing protein 82 (1)       | protein binding [GO:0005515 molecular_function] (1)                                                                                                                                                                                                                                                               | WD40/YVTN repeat-like-containing domain [IPR015943] (1); WD40 repeat [IPR001680] (1); WD40-repeat-containing domain [IPR017986] (1)                                                                                       | -                               | -                            | P_trifoliata_01186_miRNA_1,1   |
| GF0051523 | 0                            | 0                         | 1                           | Hypothetical protein (1)                  |                                                                                                                                                                                                                                                                                                                   |                                                                                                                                                                                                                           | -                               | -                            | P_trifoliata_01183_miRNA_3,1   |
| GF0051522 | 0                            | 0                         | 1                           | Hypothetical protein (1)                  |                                                                                                                                                                                                                                                                                                                   |                                                                                                                                                                                                                           | -                               | -                            | P_trifoliata_01183_miRNA_1,1   |
| GF0051521 | 0                            | 0                         | 1                           | Hypothetical protein (1)                  |                                                                                                                                                                                                                                                                                                                   |                                                                                                                                                                                                                           | -                               | -                            | P_trifoliata_01182_miRNA_6,1   |
| GF0051520 | 0                            | 0                         | 1                           | Hypothetical protein (1)                  |                                                                                                                                                                                                                                                                                                                   |                                                                                                                                                                                                                           | -                               | -                            | P_trifoliata_01182_miRNA_5,1   |
| GF0051519 | 0                            | 0                         | 1                           | Hypothetical protein (1)                  |                                                                                                                                                                                                                                                                                                                   |                                                                                                                                                                                                                           | -                               | -                            | P_trifoliata_01182_miRNA_4,1   |
| GF0051518 | 0                            | 0                         | 1                           | Hypothetical protein (1)                  |                                                                                                                                                                                                                                                                                                                   |                                                                                                                                                                                                                           | -                               | -                            | P_trifoliata_01182_miRNA_3,1   |
| GF0051517 | 0                            | 0                         | 1                           | Hypothetical protein (1)                  |                                                                                                                                                                                                                                                                                                                   |                                                                                                                                                                                                                           | -                               | -                            | P_trifoliata_01182_miRNA_2,1   |
| GF0051516 | 0                            | 0                         | 1                           | Hypothetical protein (1)                  |                                                                                                                                                                                                                                                                                                                   |                                                                                                                                                                                                                           | -                               | -                            | P_trifoliata_01180_miRNA_2,1   |
| GF0051515 | 0                            | 0                         | 1                           | Hypothetical protein (1)                  |                                                                                                                                                                                                                                                                                                                   |                                                                                                                                                                                                                           | -                               | -                            | P_trifoliata_01180_miRNA_1,1   |
| GF0051514 | 0                            | 0                         | 1                           | Hypothetical protein (1)                  |                                                                                                                                                                                                                                                                                                                   | DNA-binding pseudobarrel domain [IPR015300] (1)                                                                                                                                                                           | -                               | -                            | P_trifoliata_01179_miRNA_2,1   |
| GF0051513 | 0                            | 0                         | 1                           | Hypothetical protein (1)                  | DNA binding [GO:0003677 molecular_function] (1)                                                                                                                                                                                                                                                                   | DNA-binding pseudobarrel domain [IPR015300] (1); B3 DNA binding domain [IPR003340] (1)                                                                                                                                    | -                               | -                            | P_trifoliata_01179_miRNA_1,1   |
| GF0051512 | 0                            | 0                         | 1                           | Hypothetical protein (1)                  |                                                                                                                                                                                                                                                                                                                   |                                                                                                                                                                                                                           | -                               | -                            | P_trifoliata_01178_miRNA_3,1   |
| GF0051511 | 0                            | 0                         | 1                           | Hypothetical protein (1)                  | COP9 signalosome complex subunit 7 (1)                                                                                                                                                                                                                                                                            | Proteasome component (PCI) domain [IPR000711] (1)                                                                                                                                                                         | -                               | -                            | P_trifoliata_01178_miRNA_1,1   |
| GF0051510 | 0                            | 0                         | 1                           | Hypothetical protein (1)                  |                                                                                                                                                                                                                                                                                                                   |                                                                                                                                                                                                                           | -                               | -                            | P_trifoliata_01177_miRNA_2,1   |
| GF0051509 | 0                            | 0                         | 1                           | Hypothetical protein (1)                  |                                                                                                                                                                                                                                                                                                                   |                                                                                                                                                                                                                           | -                               | -                            | P_trifoliata_01172_miRNA_4,1   |
| GF0051508 | 0                            | 0                         | 1                           | Hypothetical protein (1)                  |                                                                                                                                                                                                                                                                                                                   |                                                                                                                                                                                                                           | -                               | -                            | P_trifoliata_01172_miRNA_3,1   |
| GF0051507 | 0                            | 0                         | 1                           | Russell I protein (1)                     | nucleic acid binding [GO:0003676 molecular_function] (1); RNA-DNA hybrid ribonuclease activity [GO:0004523 molecular_function] (1)                                                                                                                                                                                | Ribonuclease H domain [IPR002156] (1); Ribonuclease H-like domain [IPR012337] (1)                                                                                                                                         | -                               | -                            | P_trifoliata_01172_miRNA_2,1   |
| GF0051506 | 0                            | 0                         | 1                           | Alpha/beta hydrolase fold superfamily (1) |                                                                                                                                                                                                                                                                                                                   | DnaJ domain [IPR001623] (1); Alpha/beta hydrolase fold-1 [IPR000073] (1); Alpha/Beta hydrolase fold [IPR029058] (1)                                                                                                       | -                               | -                            | P_trifoliata_01171_miRNA_4,1   |
| GF0051505 | 0                            | 0                         | 1                           | Hypothetical protein (1)                  |                                                                                                                                                                                                                                                                                                                   |                                                                                                                                                                                                                           | -                               | -                            | P_trifoliata_01171_miRNA_3,1   |
| GF0051504 | 0                            | 0                         | 1                           | Hypothetical protein (1)                  |                                                                                                                                                                                                                                                                                                                   |                                                                                                                                                                                                                           | -                               | -                            | P_trifoliata_01171_miRNA_2,1   |
| GF0051503 | 0                            | 0                         | 1                           | Hypothetical protein (1)                  |                                                                                                                                                                                                                                                                                                                   |                                                                                                                                                                                                                           | -                               | -                            | P_trifoliata_01170_miRNA_4,1   |
| GF0051502 | 0                            | 0                         | 1                           | Hypothetical protein (1)                  |                                                                                                                                                                                                                                                                                                                   |                                                                                                                                                                                                                           | -                               | -                            | P_trifoliata_01170_miRNA_2,1   |
| GF0051501 | 0                            | 0                         | 1                           | Hypothetical protein (1)                  |                                                                                                                                                                                                                                                                                                                   |                                                                                                                                                                                                                           | -                               | -                            | P_trifoliata_01169_miRNA_2,1   |
| GF0051500 | 0                            | 0                         | 1                           | Hypothetical protein (1)                  |                                                                                                                                                                                                                                                                                                                   |                                                                                                                                                                                                                           | -                               | -                            | P_trifoliata_01168_miRNA_1,1   |
| GF0051499 | 0                            | 0                         | 1                           | Hypothetical protein (1)                  |                                                                                                                                                                                                                                                                                                                   |                                                                                                                                                                                                                           | -                               | -                            | P_trifoliata_01166_miRNA_2,1   |
| GF0051498 | 0                            | 0                         | 1                           | Hypothetical protein (1)                  |                                                                                                                                                                                                                                                                                                                   |                                                                                                                                                                                                                           | -                               | -                            | P_trifoliata_01166_miRNA_1,1   |
| GF0051497 | 0                            | 0                         | 1                           | Hypothetical protein (1)                  |                                                                                                                                                                                                                                                                                                                   |                                                                                                                                                                                                                           | -                               | -                            | P_trifoliata_01164_miRNA_5,1   |
| GF0051496 | 0                            | 0                         | 1                           | Hypothetical protein (1)                  |                                                                                                                                                                                                                                                                                                                   |                                                                                                                                                                                                                           | -                               | -                            | P_trifoliata_01164_miRNA_2,1   |
| GF0051495 | 0                            | 0                         | 1                           | Hypothetical protein (1)                  |                                                                                                                                                                                                                                                                                                                   |                                                                                                                                                                                                                           | -                               | -                            | P_trifoliata_01164_miRNA_1,1   |
| GF0051494 | 0                            | 0                         | 1                           | Polygalacturonase (1)                     | carbohydrate metabolic process [GO:0005975 biological_process] (1); polygalacturonase activity [GO:0004650 molecular_function] (1)                                                                                                                                                                                | Pectin lyase fold [IPR012334] (1); Pectin lyase fold/virulence factor [IPR011050] (1); Glycoside hydrolase, family 28 [IPR000743] (1); Parallel beta-helix repeat [IPR006626] (1)                                         | -                               | -                            | P_trifoliata_01163_miRNA_3,1   |
| GF0051493 | 0                            | 0                         | 1                           | Hypothetical protein (1)                  |                                                                                                                                                                                                                                                                                                                   |                                                                                                                                                                                                                           | -                               | -                            | P_trifoliata_01162_miRNA_1,1   |
| GF0051492 | 0                            | 0                         | 1                           | Xylosyltransferase 1 (1)                  | membrane [GO:0016020 cellular_component] (1); acetylglucosaminyltransferase activity [GO:0008375 molecular_function] (1)                                                                                                                                                                                          | Glycosyl transferase, family 14 [IPR003406] (1)                                                                                                                                                                           | -                               | -                            | P_trifoliata_01160_miRNA_1,1   |
| GF0051491 | 0                            | 0                         | 1                           | Hypothetical protein (1)                  |                                                                                                                                                                                                                                                                                                                   |                                                                                                                                                                                                                           | -                               | -                            | P_trifoliata_01158_miRNA_5,1   |
| GF0051490 | 0                            | 0                         | 1                           | Carboxyesterase 18 (1)                    | metabolic process [GO:0008122 biological_process] (1); hydrolase activity [GO:0016787 molecular_function] (1)                                                                                                                                                                                                     | Alpha/Beta hydrolase fold [IPR029058] (1); Alpha/beta hydrolase fold-3 [IPR013094] (1)                                                                                                                                    | -                               | -                            | P_trifoliata_01157_miRNA_1,1   |
| GF0051489 | 0                            | 0                         | 1                           | Hypothetical protein (1)                  |                                                                                                                                                                                                                                                                                                                   |                                                                                                                                                                                                                           | -                               | -                            | P_trifoliata_01154_miRNA_1,1   |
| GF0051488 | 0                            | 0                         | 1                           | Hypothetical protein (1)                  |                                                                                                                                                                                                                                                                                                                   | Leucine-rich repeat domain, L domain-like [IPR032675] (1)                                                                                                                                                                 | -                               | -                            | P_trifoliata_01153_miRNA_2,1   |
| GF0051487 | 0                            | 0                         | 1                           | Hypothetical protein (1)                  |                                                                                                                                                                                                                                                                                                                   |                                                                                                                                                                                                                           | -                               | -                            | P_trifoliata_01152_miRNA_2,1   |
| GF0051486 | 0                            | 0                         | 1                           | Hypothetical protein (1)                  |                                                                                                                                                                                                                                                                                                                   |                                                                                                                                                                                                                           | -                               | -                            | P_trifoliata_01151_miRNA_3,1   |

| ID        | Num. in <i>C. clementiae</i> | Num. in <i>C. canthii</i> | Num. in <i>P. trifoliarum</i> | Note                                                                           | GO                                                                                                                                                                                                                                                                                                                | InterPro                                                                                                                                                                                                                                                                                 | Members in <i>C. clementiae</i> | Members in <i>C. canthii</i> | Members in <i>P. trifoliarum</i> |
|-----------|------------------------------|---------------------------|-------------------------------|--------------------------------------------------------------------------------|-------------------------------------------------------------------------------------------------------------------------------------------------------------------------------------------------------------------------------------------------------------------------------------------------------------------|------------------------------------------------------------------------------------------------------------------------------------------------------------------------------------------------------------------------------------------------------------------------------------------|---------------------------------|------------------------------|----------------------------------|
| GF0051485 | 0                            | 0                         | 1                             | Small nuclear ribonucleoprotein (1)                                            | nucleic acid binding [GO:0003676 molecular_function] (1); ATP binding [GO:0005524 molecular_function] (1)                                                                                                                                                                                                         | P-loop containing nucleoside triphosphate hydrolase [IPR027417] (1); DEAD/DEAF box helicase domain [IPR01545] (1); Helicase superfamily 1/2, ATP-binding domain [IPR014001] (1)                                                                                                          | -                               | -                            | P_trifoliata_01151_mRNA_1,1      |
| GF0051484 | 0                            | 0                         | 1                             | Hypothetical protein (1)                                                       | metal ion binding [GO:0046872 molecular_function] (1); metal ion transport [GO:0030001 biological_process] (1)                                                                                                                                                                                                    | Heavy metal-associated domain, HMA [IPR006121] (1)                                                                                                                                                                                                                                       | -                               | -                            | P_trifoliata_01150_mRNA_3,1      |
| GF0051483 | 0                            | 0                         | 1                             | Hypothetical protein (1)                                                       | -                                                                                                                                                                                                                                                                                                                 | -                                                                                                                                                                                                                                                                                        | -                               | -                            | P_trifoliata_01149_mRNA_7,1      |
| GF0051482 | 0                            | 0                         | 1                             | Hypothetical protein (1)                                                       | -                                                                                                                                                                                                                                                                                                                 | -                                                                                                                                                                                                                                                                                        | -                               | -                            | P_trifoliata_01149_mRNA_6,1      |
| GF0051481 | 0                            | 0                         | 1                             | Hypothetical protein (1)                                                       | -                                                                                                                                                                                                                                                                                                                 | -                                                                                                                                                                                                                                                                                        | -                               | -                            | P_trifoliata_01149_mRNA_5,1      |
| GF0051480 | 0                            | 0                         | 1                             | Hypothetical protein (1)                                                       | -                                                                                                                                                                                                                                                                                                                 | -                                                                                                                                                                                                                                                                                        | -                               | -                            | P_trifoliata_01149_mRNA_2,1      |
| GF0051479 | 0                            | 0                         | 1                             | Hypothetical protein (1)                                                       | zinc ion binding [GO:0008270 molecular_function] (1); nucleic acid binding [GO:0003676 molecular_function] (1)                                                                                                                                                                                                    | Zinc finger, CCHC-type [IPR001878] (1)                                                                                                                                                                                                                                                   | -                               | -                            | P_trifoliata_01147_mRNA_5,1      |
| GF0051478 | 0                            | 0                         | 1                             | Hypothetical protein (1)                                                       | -                                                                                                                                                                                                                                                                                                                 | -                                                                                                                                                                                                                                                                                        | -                               | -                            | P_trifoliata_01146_mRNA_2,1      |
| GF0051477 | 0                            | 0                         | 1                             | Translation initiation factor IF-2, putative (1)                               | -                                                                                                                                                                                                                                                                                                                 | Protein of unknown function DUF674 [IPR07750] (1)                                                                                                                                                                                                                                        | -                               | -                            | P_trifoliata_01141_mRNA_6,1      |
| GF0051476 | 0                            | 0                         | 1                             | Hypothetical protein (1)                                                       | DNA binding [GO:0003677 molecular_function] (1); phosphorylation signal transduction system [GO:0000160 biological_process] (1)                                                                                                                                                                                   | Homeodomain-like [IPR009057] (1); Signal transduction response regulator, receiver domain [IPR001789] (1); CheY-like superfamily [IPR011006] (1)                                                                                                                                         | -                               | -                            | P_trifoliata_01141_mRNA_5,1      |
| GF0051475 | 0                            | 0                         | 1                             | Hypothetical protein (1)                                                       | -                                                                                                                                                                                                                                                                                                                 | CheY-like superfamily [IPR011006] (1)                                                                                                                                                                                                                                                    | -                               | -                            | P_trifoliata_01141_mRNA_4,1      |
| GF0051474 | 0                            | 0                         | 1                             | Hypothetical protein (1)                                                       | -                                                                                                                                                                                                                                                                                                                 | -                                                                                                                                                                                                                                                                                        | -                               | -                            | P_trifoliata_01141_mRNA_1,1      |
| GF0051473 | 0                            | 0                         | 1                             | Hypothetical protein (1)                                                       | -                                                                                                                                                                                                                                                                                                                 | -                                                                                                                                                                                                                                                                                        | -                               | -                            | P_trifoliata_01139_mRNA_1,1      |
| GF0051472 | 0                            | 0                         | 1                             | Hypothetical protein (1)                                                       | defense response [GO:0006952 biological_process] (1)                                                                                                                                                                                                                                                              | Koottin, scorpion toxin-like [IPR003614] (1)                                                                                                                                                                                                                                             | -                               | -                            | P_trifoliata_01138_mRNA_2,1      |
| GF0051471 | 0                            | 0                         | 1                             | Hypothetical protein (1)                                                       | -                                                                                                                                                                                                                                                                                                                 | -                                                                                                                                                                                                                                                                                        | -                               | -                            | P_trifoliata_01138_mRNA_1,1      |
| GF0051470 | 0                            | 0                         | 1                             | Hypothetical protein (1)                                                       | -                                                                                                                                                                                                                                                                                                                 | -                                                                                                                                                                                                                                                                                        | -                               | -                            | P_trifoliata_01136_mRNA_1,1      |
| GF0051469 | 0                            | 0                         | 1                             | Hypothetical protein (1)                                                       | -                                                                                                                                                                                                                                                                                                                 | -                                                                                                                                                                                                                                                                                        | -                               | -                            | P_trifoliata_01135_mRNA_2,1      |
| GF0051468 | 0                            | 0                         | 1                             | SAM domain family protein (1)                                                  | protein binding [GO:0005515 molecular_function] (1)                                                                                                                                                                                                                                                               | Sterile alpha motif/pointed domain [IPR013761] (1); Sterile alpha motif domain [IPR001660] (1)                                                                                                                                                                                           | -                               | -                            | P_trifoliata_01135_mRNA_1,1      |
| GF0051467 | 0                            | 0                         | 1                             | Hypothetical protein (1)                                                       | mRNA processing [GO:0006397 biological_process] (1); 7-methylguanosine mRNA capping [GO:0006370 biological_process] (1); mRNA guanylyltransferase activity [GO:0004484 molecular_function] (1)                                                                                                                    | mRNA capping enzyme, catalytic domain [IPR013391] (1)                                                                                                                                                                                                                                    | -                               | -                            | P_trifoliata_01133_mRNA_5,1      |
| GF0051466 | 0                            | 0                         | 1                             | Hypothetical protein (1)                                                       | -                                                                                                                                                                                                                                                                                                                 | -                                                                                                                                                                                                                                                                                        | -                               | -                            | P_trifoliata_01131_mRNA_3,1      |
| GF0051465 | 0                            | 0                         | 1                             | Hypothetical protein (1)                                                       | -                                                                                                                                                                                                                                                                                                                 | -                                                                                                                                                                                                                                                                                        | -                               | -                            | P_trifoliata_01131_mRNA_1,1      |
| GF0051464 | 0                            | 0                         | 1                             | Hypothetical protein (1)                                                       | iron ion binding [GO:0005596 molecular_function] (1); heme binding [GO:0020037 molecular_function] (1); oxidation-reduction process [GO:005114 biological_process] (1); oxidoreductase activity, acting on paired donors, with incorporation or reduction of molecular oxygen [GO:0016705 molecular_function] (1) | Cytochrome P450, E-class, group I [IPR002401] (1); Cytochrome P450 [IPR001128] (1)                                                                                                                                                                                                       | -                               | -                            | P_trifoliata_01128_mRNA_1,1      |
| GF0051463 | 0                            | 0                         | 1                             | Hypothetical protein (1)                                                       | -                                                                                                                                                                                                                                                                                                                 | -                                                                                                                                                                                                                                                                                        | -                               | -                            | P_trifoliata_01126_mRNA_1,1      |
| GF0051462 | 0                            | 0                         | 1                             | Far-red impaired responsive (FAR1) family protein (1)                          | regulation of transcription, DNA-templated [GO:0006355 biological_process] (1)                                                                                                                                                                                                                                    | FAR1 DNA binding domain [IPR004330] (1); FHY3/FAR1 family [IPR031052] (1)                                                                                                                                                                                                                | -                               | -                            | P_trifoliata_01124_mRNA_2,1      |
| GF0051461 | 0                            | 0                         | 1                             | Hypothetical protein (1)                                                       | -                                                                                                                                                                                                                                                                                                                 | -                                                                                                                                                                                                                                                                                        | -                               | -                            | P_trifoliata_01122_mRNA_1,1      |
| GF0051460 | 0                            | 0                         | 1                             | Hypothetical protein (1)                                                       | -                                                                                                                                                                                                                                                                                                                 | -                                                                                                                                                                                                                                                                                        | -                               | -                            | P_trifoliata_01121_mRNA_1,1      |
| GF0051459 | 0                            | 0                         | 1                             | Hypothetical protein (1)                                                       | -                                                                                                                                                                                                                                                                                                                 | -                                                                                                                                                                                                                                                                                        | -                               | -                            | P_trifoliata_01120_mRNA_3,1      |
| GF0051458 | 0                            | 0                         | 1                             | Hypothetical protein (1)                                                       | -                                                                                                                                                                                                                                                                                                                 | -                                                                                                                                                                                                                                                                                        | -                               | -                            | P_trifoliata_01120_mRNA_2,1      |
| GF0051457 | 0                            | 0                         | 1                             | Hypothetical protein (1)                                                       | -                                                                                                                                                                                                                                                                                                                 | -                                                                                                                                                                                                                                                                                        | -                               | -                            | P_trifoliata_01119_mRNA_1,1      |
| GF0051456 | 0                            | 0                         | 1                             | Hypothetical protein (1)                                                       | -                                                                                                                                                                                                                                                                                                                 | -                                                                                                                                                                                                                                                                                        | -                               | -                            | P_trifoliata_01118_mRNA_4,1      |
| GF0051455 | 0                            | 0                         | 1                             | Hypothetical protein (1)                                                       | -                                                                                                                                                                                                                                                                                                                 | -                                                                                                                                                                                                                                                                                        | -                               | -                            | P_trifoliata_01118_mRNA_3,1      |
| GF0051454 | 0                            | 0                         | 1                             | Hypothetical protein (1)                                                       | -                                                                                                                                                                                                                                                                                                                 | -                                                                                                                                                                                                                                                                                        | -                               | -                            | P_trifoliata_01118_mRNA_1,1      |
| GF0051453 | 0                            | 0                         | 1                             | Hypothetical protein (1)                                                       | -                                                                                                                                                                                                                                                                                                                 | -                                                                                                                                                                                                                                                                                        | -                               | -                            | P_trifoliata_01117_mRNA_3,1      |
| GF0051452 | 0                            | 0                         | 1                             | Hypothetical protein (1)                                                       | -                                                                                                                                                                                                                                                                                                                 | -                                                                                                                                                                                                                                                                                        | -                               | -                            | P_trifoliata_01117_mRNA_1,1      |
| GF0051451 | 0                            | 0                         | 1                             | Hypothetical protein (1)                                                       | -                                                                                                                                                                                                                                                                                                                 | EF-Hand 1, calcium-binding site [IPR018247] (1); Thioredoxin-like fold [IPR012336] (1)                                                                                                                                                                                                   | -                               | -                            | P_trifoliata_01116_mRNA_4,1      |
| GF0051450 | 0                            | 0                         | 1                             | Hypothetical protein (1)                                                       | carbohydrate binding [GO:0030246 molecular_function] (1)                                                                                                                                                                                                                                                          | Legume lectin domain [IPR001220] (1); Concavalin A-like lectin/glycanase domain [IPR013320] (1)                                                                                                                                                                                          | -                               | -                            | P_trifoliata_01115_mRNA_5,1      |
| GF0051449 | 0                            | 0                         | 1                             | Hypothetical protein (1)                                                       | carbohydrate binding [GO:0030246 molecular_function] (1)                                                                                                                                                                                                                                                          | Concavalin A-like lectin/glycanase domain [IPR013320] (1); Legume lectin domain [IPR001220] (1)                                                                                                                                                                                          | -                               | -                            | P_trifoliata_01115_mRNA_4,1      |
| GF0051448 | 0                            | 0                         | 1                             | Disease resistance RPS5-like protein (1)                                       | ADP binding [GO:0043531 molecular_function] (1); protein binding [GO:0005515 molecular_function] (1)                                                                                                                                                                                                              | Leucine-rich repeat domain, L domain-like [IPR026775] (1); Leucine-rich repeat [IPR016111] (1); NB-ABC [IPR002182] (1); P-loop containing nucleoside triphosphate hydrolase [IPR027417] (1)                                                                                              | -                               | -                            | P_trifoliata_01115_mRNA_1,1      |
| GF0051447 | 0                            | 0                         | 1                             | Hypothetical protein (1)                                                       | -                                                                                                                                                                                                                                                                                                                 | -                                                                                                                                                                                                                                                                                        | -                               | -                            | P_trifoliata_01114_mRNA_3,1      |
| GF0051446 | 0                            | 0                         | 1                             | Hypothetical protein (1)                                                       | voltage-gated chloride channel activity [GO:000247 molecular_function] (1); transmembrane transport [GO:005085 biological_process] (1); chloride transport [GO:0000821 biological_process] (1); membrane [GO:0016020 cellular_component] (1); ion channel activity [GO:0005216 molecular_function] (1)            | Chloride channel, core [IPR014743] (1); Chloride channel, voltage gated [IPR001807] (1)                                                                                                                                                                                                  | -                               | -                            | P_trifoliata_01113_mRNA_2,1      |
| GF0051445 | 0                            | 0                         | 1                             | Hypothetical protein (1)                                                       | -                                                                                                                                                                                                                                                                                                                 | -                                                                                                                                                                                                                                                                                        | -                               | -                            | P_trifoliata_01113_mRNA_1,1      |
| GF0051444 | 0                            | 0                         | 1                             | Hypothetical protein (1)                                                       | -                                                                                                                                                                                                                                                                                                                 | -                                                                                                                                                                                                                                                                                        | -                               | -                            | P_trifoliata_01112_mRNA_4,1      |
| GF0051443 | 0                            | 0                         | 1                             | Hypothetical protein (1)                                                       | transcription factor activity, sequence-specific DNA binding [GO:0005700 molecular_function] (1); regulation of transcription, DNA-templated [GO:0006355 biological_process] (1); DNA binding [GO:0003677 molecular_function] (1)                                                                                 | AP2/ERF domain [IPR001471] (1); DNA-binding domain [IPR016177] (1)                                                                                                                                                                                                                       | -                               | -                            | P_trifoliata_01112_mRNA_3,1      |
| GF0051442 | 0                            | 0                         | 1                             | Hypothetical protein (1)                                                       | -                                                                                                                                                                                                                                                                                                                 | -                                                                                                                                                                                                                                                                                        | -                               | -                            | P_trifoliata_01111_mRNA_1,1      |
| GF0051441 | 0                            | 0                         | 1                             | Malate synthase (1)                                                            | glyoxylate cycle [GO:0006097 biological_process] (1); catalytic activity [GO:000324 molecular_function] (1); malate synthase activity [GO:0004474 molecular_function] (1)                                                                                                                                         | Malate synthase-like [IPR011076] (1); Malate synthase [IPR001465] (1)                                                                                                                                                                                                                    | -                               | -                            | P_trifoliata_01110_mRNA_2,1      |
| GF0051440 | 0                            | 0                         | 1                             | Hypothetical protein (1)                                                       | -                                                                                                                                                                                                                                                                                                                 | -                                                                                                                                                                                                                                                                                        | -                               | -                            | P_trifoliata_01110_mRNA_1,1      |
| GF0051439 | 0                            | 0                         | 1                             | Hypothetical protein (1)                                                       | -                                                                                                                                                                                                                                                                                                                 | -                                                                                                                                                                                                                                                                                        | -                               | -                            | P_trifoliata_01109_mRNA_3,1      |
| GF0051438 | 0                            | 0                         | 1                             | Cysteine desulfurase, putative, expressed (1)                                  | catalytic activity [GO:0003824 molecular_function] (1)                                                                                                                                                                                                                                                            | Pyridoxal phosphate-dependent transferase, major region, subdomain 1 [IPR015421] (1); Pyridoxal phosphate-dependent transferase [IPR015424] (1); Aminotransferase class V domain [IPR000192] (1)                                                                                         | -                               | -                            | P_trifoliata_01103_mRNA_4,1      |
| GF0051437 | 0                            | 0                         | 1                             | Hypothetical protein (1)                                                       | -                                                                                                                                                                                                                                                                                                                 | -                                                                                                                                                                                                                                                                                        | -                               | -                            | P_trifoliata_01103_mRNA_3,1      |
| GF0051436 | 0                            | 0                         | 1                             | SufS subfamily cysteine desulfurase (1)                                        | catalytic activity [GO:0003824 molecular_function] (1)                                                                                                                                                                                                                                                            | Pyridoxal phosphate-dependent transferase [IPR015424] (1); Aminotransferase class V domain [IPR000192] (1); Trimeric LysA-like [IPR011004] (1); Nucleoside-diphosphate transferase [IPR009044] (1); Pyridoxal phosphate-dependent transferase, major region, subdomain 1 [IPR015421] (1) | -                               | -                            | P_trifoliata_01103_mRNA_1,1      |
| GF0051435 | 0                            | 0                         | 1                             | Tetriscopptide repeat (TPR)-like 1 superfamily protein, putative isoform 3 (1) | protein binding [GO:0005515 molecular_function] (1)                                                                                                                                                                                                                                                               | Tetriscopptide repeat [IPR019734] (1); Tetriscopptide repeat-containing domain [IPR013026] (1); Clustered mitochondria protein, N-terminal [IPR028275] (1); Tetriscopptide-like helical domain [IPR011990] (1)                                                                           | -                               | -                            | P_trifoliata_01102_mRNA_2,1      |
| GF0051434 | 0                            | 0                         | 1                             | Hypothetical protein (1)                                                       | -                                                                                                                                                                                                                                                                                                                 | -                                                                                                                                                                                                                                                                                        | -                               | -                            | P_trifoliata_01101_mRNA_8,1      |
| GF0051433 | 0                            | 0                         | 1                             | Hypothetical protein (1)                                                       | -                                                                                                                                                                                                                                                                                                                 | -                                                                                                                                                                                                                                                                                        | -                               | -                            | P_trifoliata_01101_mRNA_7,1      |
| GF0051432 | 0                            | 0                         | 1                             | Hypothetical protein (1)                                                       | -                                                                                                                                                                                                                                                                                                                 | -                                                                                                                                                                                                                                                                                        | -                               | -                            | P_trifoliata_01101_mRNA_6,1      |
| GF0051431 | 0                            | 0                         | 1                             | Hypothetical protein (1)                                                       | -                                                                                                                                                                                                                                                                                                                 | -                                                                                                                                                                                                                                                                                        | -                               | -                            | P_trifoliata_01101_mRNA_5,1      |
| GF0051430 | 0                            | 0                         | 1                             | Hypothetical protein (1)                                                       | zinc ion binding [GO:0008270 molecular_function] (1)                                                                                                                                                                                                                                                              | Zinc finger, PMZ-type [IPR006564] (1); Zinc finger, SWIM-type [IPR007527] (1)                                                                                                                                                                                                            | -                               | -                            | P_trifoliata_01100_mRNA_3,1      |
| GF0051429 | 0                            | 0                         | 1                             | Hypothetical protein (1)                                                       | -                                                                                                                                                                                                                                                                                                                 | Leucine-rich repeat domain, L domain-like [IPR026775] (1)                                                                                                                                                                                                                                | -                               | -                            | P_trifoliata_01099_mRNA_4,1      |
| GF0051428 | 0                            | 0                         | 1                             | Hypothetical protein (1)                                                       | protein binding [GO:0005515 molecular_function] (1)                                                                                                                                                                                                                                                               | SH3 domain [IPR001452] (1)                                                                                                                                                                                                                                                               | -                               | -                            | P_trifoliata_01099_mRNA_3,1      |
| GF0051427 | 0                            | 0                         | 1                             | Hypothetical protein (1)                                                       | -                                                                                                                                                                                                                                                                                                                 | -                                                                                                                                                                                                                                                                                        | -                               | -                            | P_trifoliata_01098_mRNA_1,1      |
| GF0051426 | 0                            | 0                         | 1                             | Hypothetical protein (1)                                                       | -                                                                                                                                                                                                                                                                                                                 | -                                                                                                                                                                                                                                                                                        | -                               | -                            | P_trifoliata_01097_mRNA_1,1      |
| GF0051425 | 0                            | 0                         | 1                             | Lectin (1)                                                                     | carbohydrate binding [GO:0030246 molecular_function] (1)                                                                                                                                                                                                                                                          | Legume lectin, beta chain, Man/6 binding site [IPR019825] (1); Concavalin A-like lectin/glycanase domain [IPR013320] (1); Legume lectin domain [IPR001220] (1)                                                                                                                           | -                               | -                            | P_trifoliata_01095_mRNA_2,1      |

| ID        | Num. in <i>C. clementiae</i> | Num. in <i>C. canthii</i> | Num. in <i>P. trifoliata</i> | Note                                                | GO                                                                                                                                                                                                                                                                                                              | InterPro                                                                                                                                                                             | Members in <i>C. clementiae</i> | Members in <i>C. canthii</i> | Members in <i>P. trifoliata</i> |
|-----------|------------------------------|---------------------------|------------------------------|-----------------------------------------------------|-----------------------------------------------------------------------------------------------------------------------------------------------------------------------------------------------------------------------------------------------------------------------------------------------------------------|--------------------------------------------------------------------------------------------------------------------------------------------------------------------------------------|---------------------------------|------------------------------|---------------------------------|
| GF0051424 | 0                            | 0                         | 1                            | Hypothetical protein (1)                            |                                                                                                                                                                                                                                                                                                                 |                                                                                                                                                                                      |                                 |                              | P_trifoliata_01094_miRNA_2,1    |
| GF0051423 | 0                            | 0                         | 1                            | Hypothetical protein (1)                            |                                                                                                                                                                                                                                                                                                                 |                                                                                                                                                                                      |                                 |                              | P_trifoliata_01094_miRNA_1,1    |
| GF0051422 | 0                            | 0                         | 1                            | Hypothetical protein (1)                            | ATP binding [GO:0005524 molecular_function] (1); protein phosphorylation [GO:0006468 biological_process] (1); protein kinase activity [GO:0004872 molecular_function] (1)                                                                                                                                       | Protein kinase-like domain [IPRO11009] (1); Protein kinase domain [IPRO00719] (1)                                                                                                    |                                 |                              | P_trifoliata_01093_miRNA_2,1    |
| GF0051421 | 0                            | 0                         | 1                            | Hypothetical protein (1)                            |                                                                                                                                                                                                                                                                                                                 |                                                                                                                                                                                      |                                 |                              | P_trifoliata_01092_miRNA_4,1    |
| GF0051420 | 0                            | 0                         | 1                            | Hypothetical protein (1)                            |                                                                                                                                                                                                                                                                                                                 |                                                                                                                                                                                      |                                 |                              | P_trifoliata_01092_miRNA_3,1    |
| GF0051419 | 0                            | 0                         | 1                            | Hypothetical protein (1)                            |                                                                                                                                                                                                                                                                                                                 |                                                                                                                                                                                      |                                 |                              | P_trifoliata_01091_miRNA_7,1    |
| GF0051418 | 0                            | 0                         | 1                            | Hypothetical protein (1)                            |                                                                                                                                                                                                                                                                                                                 |                                                                                                                                                                                      |                                 |                              | P_trifoliata_01091_miRNA_5,1    |
| GF0051417 | 0                            | 0                         | 1                            | Hypothetical protein (1)                            |                                                                                                                                                                                                                                                                                                                 |                                                                                                                                                                                      |                                 |                              | P_trifoliata_01091_miRNA_3,1    |
| GF0051416 | 0                            | 0                         | 1                            | Hypothetical protein (1)                            |                                                                                                                                                                                                                                                                                                                 |                                                                                                                                                                                      |                                 |                              | P_trifoliata_01090_miRNA_4,1    |
| GF0051415 | 0                            | 0                         | 1                            | Cytochrome P450 (1)                                 | heme binding [GO:002037 molecular_function] (1); non ion binding [GO:0005506 molecular_function] (1); oxidation-reduction process [GO:005114 biological_process] (1); oxidoreductase activity, acting on paired donors, with incorporation or reduction of molecular oxygen [GO:0016705 molecular_function] (1) | Cytochrome P450, F-class, group I [IPRO02401] (1); Cytochrome P450 [IPRO01128] (1)                                                                                                   |                                 |                              | P_trifoliata_01089_miRNA_1,1    |
| GF0051414 | 0                            | 0                         | 1                            | Hypothetical protein (1)                            |                                                                                                                                                                                                                                                                                                                 |                                                                                                                                                                                      |                                 |                              | P_trifoliata_01088_miRNA_2,1    |
| GF0051413 | 0                            | 0                         | 1                            | Hypothetical protein (1)                            |                                                                                                                                                                                                                                                                                                                 | Reverse transcriptase domain [IPRO00477] (1)                                                                                                                                         |                                 |                              | P_trifoliata_01088_miRNA_1,1    |
| GF0051412 | 0                            | 0                         | 1                            | Hypothetical protein (1)                            |                                                                                                                                                                                                                                                                                                                 |                                                                                                                                                                                      |                                 |                              | P_trifoliata_01085_miRNA_2,1    |
| GF0051411 | 0                            | 0                         | 1                            | Hypothetical protein (1)                            | polysaccharide binding [GO:0030247 molecular_function] (1)                                                                                                                                                                                                                                                      | Wall-associated receptor kinase, galacturon-binding domain [IPRO25287] (1)                                                                                                           |                                 |                              | P_trifoliata_01084_miRNA_2,1    |
| GF0051410 | 0                            | 0                         | 1                            | Hypothetical protein (1)                            |                                                                                                                                                                                                                                                                                                                 |                                                                                                                                                                                      |                                 |                              | P_trifoliata_01084_miRNA_1,1    |
| GF0051409 | 0                            | 0                         | 1                            | Hypothetical protein (1)                            | response to stress [GO:0006950 biological_process] (1)                                                                                                                                                                                                                                                          | Late embryogenesis abundant protein, LEA5-type [IPRO04926] (1)                                                                                                                       |                                 |                              | P_trifoliata_01083_miRNA_8,1    |
| GF0051408 | 0                            | 0                         | 1                            | Hypothetical protein (1)                            |                                                                                                                                                                                                                                                                                                                 |                                                                                                                                                                                      |                                 |                              | P_trifoliata_01083_miRNA_6,1    |
| GF0051407 | 0                            | 0                         | 1                            | Hypothetical protein (1)                            |                                                                                                                                                                                                                                                                                                                 |                                                                                                                                                                                      |                                 |                              | P_trifoliata_01083_miRNA_5,1    |
| GF0051406 | 0                            | 0                         | 1                            | Hypothetical protein (1)                            |                                                                                                                                                                                                                                                                                                                 | Formin, FH2 domain [IPRO15425] (1)                                                                                                                                                   |                                 |                              | P_trifoliata_01082_miRNA_2,1    |
| GF0051405 | 0                            | 0                         | 1                            | Hypothetical protein (1)                            |                                                                                                                                                                                                                                                                                                                 |                                                                                                                                                                                      |                                 |                              | P_trifoliata_01082_miRNA_1,1    |
| GF0051404 | 0                            | 0                         | 1                            | Hypothetical protein (1)                            |                                                                                                                                                                                                                                                                                                                 |                                                                                                                                                                                      |                                 |                              | P_trifoliata_01081_miRNA_6,1    |
| GF0051403 | 0                            | 0                         | 1                            | Hypothetical protein (1)                            |                                                                                                                                                                                                                                                                                                                 |                                                                                                                                                                                      |                                 |                              | P_trifoliata_01081_miRNA_4,1    |
| GF0051402 | 0                            | 0                         | 1                            | Hypothetical protein (1)                            |                                                                                                                                                                                                                                                                                                                 |                                                                                                                                                                                      |                                 |                              | P_trifoliata_01080_miRNA_1,1    |
| GF0051401 | 0                            | 0                         | 1                            | Hypothetical protein (1)                            | nucleic acid binding [GO:0003676 molecular_function] (1); zinc ion binding [GO:0008270 molecular_function] (1)                                                                                                                                                                                                  | Zinc knuckle CX2CX4HX4C [IPRO25836] (1); Zinc finger, CCHC-type [IPRO01878] (1)                                                                                                      |                                 |                              | P_trifoliata_01079_miRNA_5,1    |
| GF0051400 | 0                            | 0                         | 1                            | Hypothetical protein (1)                            |                                                                                                                                                                                                                                                                                                                 | Reverse transcriptase domain [IPRO00477] (1)                                                                                                                                         |                                 |                              | P_trifoliata_01079_miRNA_4,1    |
| GF0051399 | 0                            | 0                         | 1                            | Hypothetical protein (1)                            |                                                                                                                                                                                                                                                                                                                 |                                                                                                                                                                                      |                                 |                              | P_trifoliata_01078_miRNA_2,1    |
| GF0051398 | 0                            | 0                         | 1                            | Hypothetical protein (1)                            |                                                                                                                                                                                                                                                                                                                 | Protein of unknown function DUF247, plant [IPRO04158] (1)                                                                                                                            |                                 |                              | P_trifoliata_01078_miRNA_1,1    |
| GF0051397 | 0                            | 0                         | 1                            | Hypothetical protein (1)                            |                                                                                                                                                                                                                                                                                                                 |                                                                                                                                                                                      |                                 |                              | P_trifoliata_01077_miRNA_6,1    |
| GF0051396 | 0                            | 0                         | 1                            | Hypothetical protein (1)                            |                                                                                                                                                                                                                                                                                                                 | Isopenicillin N synthase-like [IPRO27443] (1)                                                                                                                                        |                                 |                              | P_trifoliata_01077_miRNA_3,1    |
| GF0051395 | 0                            | 0                         | 1                            | Hypothetical protein (1)                            |                                                                                                                                                                                                                                                                                                                 |                                                                                                                                                                                      |                                 |                              | P_trifoliata_01077_miRNA_1,1    |
| GF0051394 | 0                            | 0                         | 1                            | Hypothetical protein (1)                            |                                                                                                                                                                                                                                                                                                                 |                                                                                                                                                                                      |                                 |                              | P_trifoliata_01076_miRNA_5,1    |
| GF0051393 | 0                            | 0                         | 1                            | Hypothetical protein (1)                            | nuclear chromosome [GO:0000228 cellular_component] (1)                                                                                                                                                                                                                                                          | Rad21/Rec8-like protein, C-terminal [IPRO25993] (1); Rad21/Rec8-like protein, C-terminal, eukaryotic [IPRO06909] (1); Winged helix-turn-helix DNA-binding domain [IPRO11991] (1)     |                                 |                              | P_trifoliata_01076_miRNA_1,1    |
| GF0051392 | 0                            | 0                         | 1                            | Transposon protein, putative, Mutator sub-class (1) |                                                                                                                                                                                                                                                                                                                 | Transposase, MuDR, plant [IPRO04332] (1); MULE transposase domain [IPRO18289] (1)                                                                                                    |                                 |                              | P_trifoliata_01075_miRNA_3,1    |
| GF0051391 | 0                            | 0                         | 1                            | Hypothetical protein (1)                            | integral component of membrane [GO:0016021 cellular_component] (1)                                                                                                                                                                                                                                              | Nonaspanin (TN5SF) [IPRO04240] (1)                                                                                                                                                   |                                 |                              | P_trifoliata_01074_miRNA_2,1    |
| GF0051390 | 0                            | 0                         | 1                            | Hypothetical protein (1)                            |                                                                                                                                                                                                                                                                                                                 |                                                                                                                                                                                      |                                 |                              | P_trifoliata_01072_miRNA_6,1    |
| GF0051389 | 0                            | 0                         | 1                            | Hypothetical protein (1)                            |                                                                                                                                                                                                                                                                                                                 |                                                                                                                                                                                      |                                 |                              | P_trifoliata_01072_miRNA_5,1    |
| GF0051388 | 0                            | 0                         | 1                            | Hypothetical protein (1)                            |                                                                                                                                                                                                                                                                                                                 |                                                                                                                                                                                      |                                 |                              | P_trifoliata_01072_miRNA_4,1    |
| GF0051387 | 0                            | 0                         | 1                            | Hypothetical protein (1)                            |                                                                                                                                                                                                                                                                                                                 |                                                                                                                                                                                      |                                 |                              | P_trifoliata_01072_miRNA_3,1    |
| GF0051386 | 0                            | 0                         | 1                            | Hypothetical protein (1)                            |                                                                                                                                                                                                                                                                                                                 |                                                                                                                                                                                      |                                 |                              | P_trifoliata_01071_miRNA_4,1    |
| GF0051385 | 0                            | 0                         | 1                            | Hypothetical protein (1)                            |                                                                                                                                                                                                                                                                                                                 |                                                                                                                                                                                      |                                 |                              | P_trifoliata_01071_miRNA_1,1    |
| GF0051384 | 0                            | 0                         | 1                            | Hypothetical protein (1)                            | polysaccharide binding [GO:0030247 molecular_function] (1)                                                                                                                                                                                                                                                      | Wall-associated receptor kinase, galacturon-binding domain [IPRO25287] (1)                                                                                                           |                                 |                              | P_trifoliata_01070_miRNA_4,1    |
| GF0051383 | 0                            | 0                         | 1                            | Hypothetical protein (1)                            |                                                                                                                                                                                                                                                                                                                 |                                                                                                                                                                                      |                                 |                              | P_trifoliata_01070_miRNA_1,1    |
| GF0051382 | 0                            | 0                         | 1                            | Hypothetical protein (1)                            |                                                                                                                                                                                                                                                                                                                 |                                                                                                                                                                                      |                                 |                              | P_trifoliata_01068_miRNA_5,1    |
| GF0051381 | 0                            | 0                         | 1                            | Hypothetical protein (1)                            |                                                                                                                                                                                                                                                                                                                 |                                                                                                                                                                                      |                                 |                              | P_trifoliata_01068_miRNA_3,1    |
| GF0051380 | 0                            | 0                         | 1                            | Hypothetical protein (1)                            | transcription factor activity, sequence-specific DNA binding [GO:0003700 molecular_function] (1); regulation of transcription, DNA-templated [GO:0006355 biological_process] (1)                                                                                                                                | AP2/ERF domain [IPRO01471] (1)                                                                                                                                                       |                                 |                              | P_trifoliata_01067_miRNA_1,1    |
| GF0051379 | 0                            | 0                         | 1                            | Hypothetical protein (1)                            |                                                                                                                                                                                                                                                                                                                 |                                                                                                                                                                                      |                                 |                              | P_trifoliata_01066_miRNA_2,1    |
| GF0051378 | 0                            | 0                         | 1                            | Disease resistance protein RPS5 (1)                 | ADP binding [GO:0043531 molecular_function] (1)                                                                                                                                                                                                                                                                 | P-loop containing nucleoside triphosphate hydrolase [IPRO27417] (1); AAA+ ATPase domain [IPRO03593] (1); NB-ARC [IPRO02182] (1); Protein of unknown function DUF2921 [IPRO21319] (1) |                                 |                              | P_trifoliata_01066_miRNA_1,1    |
| GF0051377 | 0                            | 0                         | 1                            | Hypothetical protein (1)                            |                                                                                                                                                                                                                                                                                                                 |                                                                                                                                                                                      |                                 |                              | P_trifoliata_01065_miRNA_3,1    |
| GF0051376 | 0                            | 0                         | 1                            | Hypothetical protein (1)                            |                                                                                                                                                                                                                                                                                                                 |                                                                                                                                                                                      |                                 |                              | P_trifoliata_01065_miRNA_1,1    |
| GF0051375 | 0                            | 0                         | 1                            | Hypothetical protein (1)                            |                                                                                                                                                                                                                                                                                                                 |                                                                                                                                                                                      |                                 |                              | P_trifoliata_01063_miRNA_8,1    |
| GF0051374 | 0                            | 0                         | 1                            | Hypothetical protein (1)                            |                                                                                                                                                                                                                                                                                                                 |                                                                                                                                                                                      |                                 |                              | P_trifoliata_01063_miRNA_7,1    |
| GF0051373 | 0                            | 0                         | 1                            | Hypothetical protein (1)                            |                                                                                                                                                                                                                                                                                                                 |                                                                                                                                                                                      |                                 |                              | P_trifoliata_01063_miRNA_5,1    |
| GF0051372 | 0                            | 0                         | 1                            | Hypothetical protein (1)                            |                                                                                                                                                                                                                                                                                                                 |                                                                                                                                                                                      |                                 |                              | P_trifoliata_01063_miRNA_4,1    |
| GF0051371 | 0                            | 0                         | 1                            | Hypothetical protein (1)                            |                                                                                                                                                                                                                                                                                                                 |                                                                                                                                                                                      |                                 |                              | P_trifoliata_01063_miRNA_3,1    |
| GF0051370 | 0                            | 0                         | 1                            | Hypothetical protein (1)                            |                                                                                                                                                                                                                                                                                                                 |                                                                                                                                                                                      |                                 |                              | P_trifoliata_01063_miRNA_2,1    |
| GF0051369 | 0                            | 0                         | 1                            | Hypothetical protein (1)                            |                                                                                                                                                                                                                                                                                                                 |                                                                                                                                                                                      |                                 |                              | P_trifoliata_01063_miRNA_10,1   |
| GF0051368 | 0                            | 0                         | 1                            | Hypothetical protein (1)                            |                                                                                                                                                                                                                                                                                                                 |                                                                                                                                                                                      |                                 |                              | P_trifoliata_01063_miRNA_1,1    |
| GF0051367 | 0                            | 0                         | 1                            | Hypothetical protein (1)                            | ADP binding [GO:0043531 molecular_function] (1)                                                                                                                                                                                                                                                                 | NB-ARC [IPRO02182] (1); P-loop containing nucleoside triphosphate hydrolase [IPRO27417] (1)                                                                                          |                                 |                              | P_trifoliata_01062_miRNA_5,1    |
| GF0051366 | 0                            | 0                         | 1                            | TMV resistance protein N (1)                        |                                                                                                                                                                                                                                                                                                                 | P-loop containing nucleoside triphosphate hydrolase [IPRO27417] (1); Winged helix-turn-helix DNA-binding domain [IPRO11991] (1)                                                      |                                 |                              | P_trifoliata_01062_miRNA_4,1    |
| GF0051365 | 0                            | 0                         | 1                            | Hypothetical protein (1)                            |                                                                                                                                                                                                                                                                                                                 |                                                                                                                                                                                      |                                 |                              | P_trifoliata_01062_miRNA_2,1    |
| GF0051364 | 0                            | 0                         | 1                            | Hypothetical protein (1)                            |                                                                                                                                                                                                                                                                                                                 |                                                                                                                                                                                      |                                 |                              | P_trifoliata_01062_miRNA_1,1    |
| GF0051363 | 0                            | 0                         | 1                            | NBS-LRR type disease resistance protein (1)         | ADP binding [GO:0043531 molecular_function] (1)                                                                                                                                                                                                                                                                 | P-loop containing nucleoside triphosphate hydrolase [IPRO27417] (1); NB-ARC [IPRO02182] (1)                                                                                          |                                 |                              | P_trifoliata_01061_miRNA_1,1    |
| GF0051362 | 0                            | 0                         | 1                            | Hypothetical protein (1)                            |                                                                                                                                                                                                                                                                                                                 |                                                                                                                                                                                      |                                 |                              | P_trifoliata_01060_miRNA_2,1    |
| GF0051361 | 0                            | 0                         | 1                            | Hypothetical protein (1)                            |                                                                                                                                                                                                                                                                                                                 | Protein of unknown function DUF3522 [IPRO21910] (1)                                                                                                                                  |                                 |                              | P_trifoliata_01059_miRNA_6,1    |
| GF0051360 | 0                            | 0                         | 1                            | Hypothetical protein (1)                            |                                                                                                                                                                                                                                                                                                                 |                                                                                                                                                                                      |                                 |                              | P_trifoliata_01059_miRNA_1,1    |
| GF0051359 | 0                            | 0                         | 1                            | Hypothetical protein (1)                            |                                                                                                                                                                                                                                                                                                                 |                                                                                                                                                                                      |                                 |                              | P_trifoliata_01057_miRNA_7,1    |
| GF0051358 | 0                            | 0                         | 1                            | Hypothetical protein (1)                            | zinc ion binding [GO:0008270 molecular_function] (1); nucleic acid binding [GO:0003676 molecular_function] (1)                                                                                                                                                                                                  | Zinc knuckle CX2CX4HX4C [IPRO25836] (1); Zinc finger, CCHC-type [IPRO01878] (1)                                                                                                      |                                 |                              | P_trifoliata_01057_miRNA_4,1    |
| GF0051357 | 0                            | 0                         | 1                            | Hypothetical protein (1)                            |                                                                                                                                                                                                                                                                                                                 |                                                                                                                                                                                      |                                 |                              | P_trifoliata_01057_miRNA_1,1    |
| GF0051356 | 0                            | 0                         | 1                            | Hypothetical protein (1)                            | nucleic acid binding [GO:0003676 molecular_function] (1); regulation of transcription, DNA-templated [GO:0006355 biological_process] (1)                                                                                                                                                                        | Carlavirus nucleic acid-binding protein [IPRO02568] (1)                                                                                                                              |                                 |                              | P_trifoliata_01056_miRNA_4,1    |
| GF0051355 | 0                            | 0                         | 1                            | Hypothetical protein (1)                            |                                                                                                                                                                                                                                                                                                                 |                                                                                                                                                                                      |                                 |                              | P_trifoliata_01055_miRNA_4,1    |
| GF0051354 | 0                            | 0                         | 1                            | Sex determination protein tasselseed-2 (1)          | metabolic process [GO:0008152 biological_process] (1); oxidoreductase activity [GO:0016491 molecular_function] (1)                                                                                                                                                                                              | Glucose/ribose dehydrogenase [IPRO02471] (1); Short-chain dehydrogenase/reductase SDR [IPRO02198] (1); NAD(P)-binding domain [IPRO16040] (1)                                         |                                 |                              | P_trifoliata_01054_miRNA_1,1    |
| GF0051353 | 0                            | 0                         | 1                            | Hypothetical protein (1)                            |                                                                                                                                                                                                                                                                                                                 |                                                                                                                                                                                      |                                 |                              | P_trifoliata_01052_miRNA_7,1    |
| GF0051352 | 0                            | 0                         | 1                            | CW14 protein isoform 1 (1)                          |                                                                                                                                                                                                                                                                                                                 | Domain of unknown function DUF1336 [IPRO09769] (1)                                                                                                                                   |                                 |                              | P_trifoliata_01052_miRNA_6,1    |
| GF0051351 | 0                            | 0                         | 1                            | Ripening related protein family (1)                 |                                                                                                                                                                                                                                                                                                                 | RipA-like double-pore beta-barrel domain [IPRO09009] (1)                                                                                                                             |                                 |                              | P_trifoliata_01052_miRNA_5,1    |
| GF0051350 | 0                            | 0                         | 1                            | Hypothetical protein (1)                            |                                                                                                                                                                                                                                                                                                                 |                                                                                                                                                                                      |                                 |                              | P_trifoliata_01052_miRNA_4,1    |
| GF0051349 | 0                            | 0                         | 1                            | Hypothetical protein (1)                            |                                                                                                                                                                                                                                                                                                                 |                                                                                                                                                                                      |                                 |                              | P_trifoliata_01052_miRNA_2,1    |
| GF0051348 | 0                            | 0                         | 1                            | Hypothetical protein (1)                            |                                                                                                                                                                                                                                                                                                                 |                                                                                                                                                                                      |                                 |                              | P_trifoliata_01051_miRNA_3,1    |
| GF0051347 | 0                            | 0                         | 1                            | Hypothetical protein (1)                            |                                                                                                                                                                                                                                                                                                                 |                                                                                                                                                                                      |                                 |                              | P_trifoliata_01050_miRNA_4,1    |
| GF0051346 | 0                            | 0                         | 1                            | Hypothetical protein (1)                            | DNA integration [GO:0015074 biological_process] (1); nucleic acid binding [GO:0003676 molecular_function] (1)                                                                                                                                                                                                   | Ribonuclease H-like domain [IPRO12337] (1); Integrase, catalytic core [IPRO1584] (1)                                                                                                 |                                 |                              | P_trifoliata_01050_miRNA_3,1    |

| ID        | Num. in <i>C. clementiae</i> | Num. in <i>C. canihii</i> | Num. in <i>P. trifoliata</i> | Note                                                                     | GO                                                                                                                                                                                                                                                                                                                                                                            | InterPro                                                                                                                                                               | Members in <i>C. clementiae</i> | Members in <i>C. canihii</i> | Members in <i>P. trifoliata</i> |
|-----------|------------------------------|---------------------------|------------------------------|--------------------------------------------------------------------------|-------------------------------------------------------------------------------------------------------------------------------------------------------------------------------------------------------------------------------------------------------------------------------------------------------------------------------------------------------------------------------|------------------------------------------------------------------------------------------------------------------------------------------------------------------------|---------------------------------|------------------------------|---------------------------------|
| GF0051345 | 0                            | 0                         | 0                            | 1 Hypothetical protein (1)                                               |                                                                                                                                                                                                                                                                                                                                                                               |                                                                                                                                                                        | -                               | -                            | P_trifoliata_01050_mRNA_1,1     |
| GF0051344 | 0                            | 0                         | 0                            | 1 Metacaspase 1 isoform 2 (1)                                            |                                                                                                                                                                                                                                                                                                                                                                               | Caspase-like domain [IPRO29030] (1)                                                                                                                                    | -                               | -                            | P_trifoliata_01049_mRNA_5,1     |
| GF0051343 | 0                            | 0                         | 0                            | 1 Hypothetical protein (1)                                               |                                                                                                                                                                                                                                                                                                                                                                               |                                                                                                                                                                        | -                               | -                            | P_trifoliata_01049_mRNA_3,1     |
| GF0051342 | 0                            | 0                         | 0                            | 1 Hypothetical protein (1)                                               |                                                                                                                                                                                                                                                                                                                                                                               |                                                                                                                                                                        | -                               | -                            | P_trifoliata_01049_mRNA_2,1     |
| GF0051341 | 0                            | 0                         | 0                            | 1 Hypothetical protein (1)                                               |                                                                                                                                                                                                                                                                                                                                                                               |                                                                                                                                                                        | -                               | -                            | P_trifoliata_01049_mRNA_1,1     |
| GF0051340 | 0                            | 0                         | 0                            | 1 Hypothetical protein (1)                                               |                                                                                                                                                                                                                                                                                                                                                                               |                                                                                                                                                                        | -                               | -                            | P_trifoliata_01048_mRNA_2,1     |
| GF0051339 | 0                            | 0                         | 0                            | 1 Hypothetical protein (1)                                               | heme binding [GO:0020037]<br>molecular_function (1); iron ion binding [GO:0005506 molecular_function] (1); oxidoreductase activity, acting on paired donors, with incorporation or reduction of molecular oxygen [GO:0016705 molecular_function] (1); oxidation-reduction process [GO:0055114 biological_process] (1)                                                         | Cytochrome P450 [IPRO01128] (1)                                                                                                                                        | -                               | -                            | P_trifoliata_01046_mRNA_3,1     |
| GF0051338 | 0                            | 0                         | 0                            | 1 Cytochrome P450 (1)                                                    | heme binding [GO:0020037]<br>molecular_function (1); catalytic activity [GO:0003524 molecular_function] (1); iron ion binding [GO:0005506 molecular_function] (1); oxidation-reduction process [GO:0055114 biological_process] (1); oxidoreductase activity, acting on paired donors, with incorporation or reduction of molecular oxygen [GO:0016705 molecular_function] (1) | Histidine triad, conserved site [IPRO19808] (1); HHT-like domain [IPRO11468] (1); Cytochrome P450 [IPRO01128] (1); Histidine triad (HHT) protein [IPRO01310] (1)       | -                               | -                            | P_trifoliata_01046_mRNA_1,1     |
| GF0051337 | 0                            | 0                         | 0                            | 1 Hypothetical protein (1)                                               |                                                                                                                                                                                                                                                                                                                                                                               |                                                                                                                                                                        | -                               | -                            | P_trifoliata_01045_mRNA_2,1     |
| GF0051336 | 0                            | 0                         | 0                            | 1 Putative disease resistance RPP13-like protein 1 (1)                   | ADP binding [GO:0043531 molecular_function] (1)                                                                                                                                                                                                                                                                                                                               | Leucine-rich repeat domain, L domain-like [IPRO132675] (1); P-loop containing nucleoside triphosphate hydrolase [IPRO27417] (1); NB-ARC [IPRO02182] (1)                | -                               | -                            | P_trifoliata_01043_mRNA_2,1     |
| GF0051335 | 0                            | 0                         | 0                            | 1 Hypothetical protein (1)                                               |                                                                                                                                                                                                                                                                                                                                                                               |                                                                                                                                                                        | -                               | -                            | P_trifoliata_01043_mRNA_1,1     |
| GF0051334 | 0                            | 0                         | 0                            | 1 Hypothetical protein (1)                                               |                                                                                                                                                                                                                                                                                                                                                                               |                                                                                                                                                                        | -                               | -                            | P_trifoliata_01042_mRNA_4,1     |
| GF0051333 | 0                            | 0                         | 0                            | 1 Disease resistance protein RPS5 (1)                                    | ADP binding [GO:0043531 molecular_function] (1)                                                                                                                                                                                                                                                                                                                               | P-loop containing nucleoside triphosphate hydrolase [IPRO27417] (1); NB-ARC [IPRO02182] (1)                                                                            | -                               | -                            | P_trifoliata_01042_mRNA_2,1     |
| GF0051332 | 0                            | 0                         | 0                            | 1 Hypothetical protein (1)                                               |                                                                                                                                                                                                                                                                                                                                                                               | Transposase-associated domain [IPRO29480] (1)                                                                                                                          | -                               | -                            | P_trifoliata_01040_mRNA_3,1     |
| GF0051331 | 0                            | 0                         | 0                            | 1 DNA (apurinic or apyrimidinic site) lyase (1)                          | endonuclease activity [GO:0004519 molecular_function] (1); DNA repair [GO:0006231 biological_process] (1); DNA binding [GO:0003677 molecular_function] (1); intracellular [GO:0005622 cellular_component] (1); nuclease activity [GO:0004518 molecular_function] (1)                                                                                                          | Endonuclease/comoelase/phosphatase [IPRO05135] (1); AP endonuclease I, conserved site [IPRO20848] (1); AP endonuclease I [IPRO04808] (1)                               | -                               | -                            | P_trifoliata_01040_mRNA_1,1     |
| GF0051330 | 0                            | 0                         | 0                            | 1 Hypothetical protein (1)                                               |                                                                                                                                                                                                                                                                                                                                                                               |                                                                                                                                                                        | -                               | -                            | P_trifoliata_01038_mRNA_7,1     |
| GF0051329 | 0                            | 0                         | 0                            | 1 Hypothetical protein (1)                                               |                                                                                                                                                                                                                                                                                                                                                                               |                                                                                                                                                                        | -                               | -                            | P_trifoliata_01038_mRNA_5,1     |
| GF0051328 | 0                            | 0                         | 0                            | 1 Hypothetical protein (1)                                               |                                                                                                                                                                                                                                                                                                                                                                               |                                                                                                                                                                        | -                               | -                            | P_trifoliata_01038_mRNA_2,1     |
| GF0051327 | 0                            | 0                         | 0                            | 1 Hypothetical protein (1)                                               |                                                                                                                                                                                                                                                                                                                                                                               | Transposon, En/Spm-like [IPRO04242] (1)                                                                                                                                | -                               | -                            | P_trifoliata_01038_mRNA_10,1    |
| GF0051326 | 0                            | 0                         | 0                            | 1 Hypothetical protein (1)                                               |                                                                                                                                                                                                                                                                                                                                                                               |                                                                                                                                                                        | -                               | -                            | P_trifoliata_01036_mRNA_2,1     |
| GF0051325 | 0                            | 0                         | 0                            | 1 Hypothetical protein (1)                                               |                                                                                                                                                                                                                                                                                                                                                                               |                                                                                                                                                                        | -                               | -                            | P_trifoliata_01035_mRNA_5,1     |
| GF0051324 | 0                            | 0                         | 0                            | 1 Hypothetical protein (1)                                               | phospholipid binding [GO:0005543 molecular_function] (1)                                                                                                                                                                                                                                                                                                                      | AP180 N-terminal homology (ANTH) domain [IPRO11477] (1); ENTH/VHS [IPRO08942] (1); ENTH domain [IPRO13809] (1)                                                         | -                               | -                            | P_trifoliata_01035_mRNA_1,1     |
| GF0051323 | 0                            | 0                         | 0                            | 1 Hypothetical protein (1)                                               |                                                                                                                                                                                                                                                                                                                                                                               | Domain of unknown function DUF4283 [IPRO25558] (1); Endonuclease/comoelase/phosphatase [IPRO05135] (1)                                                                 | -                               | -                            | P_trifoliata_01034_mRNA_4,1     |
| GF0051322 | 0                            | 0                         | 0                            | 1 Hypothetical protein (1)                                               |                                                                                                                                                                                                                                                                                                                                                                               |                                                                                                                                                                        | -                               | -                            | P_trifoliata_01034_mRNA_3,1     |
| GF0051321 | 0                            | 0                         | 0                            | 1 Hypothetical protein (1)                                               |                                                                                                                                                                                                                                                                                                                                                                               |                                                                                                                                                                        | -                               | -                            | P_trifoliata_01034_mRNA_1,1     |
| GF0051320 | 0                            | 0                         | 0                            | 1 Hydroxyproline-rich glycoprotein family protein (1)                    |                                                                                                                                                                                                                                                                                                                                                                               |                                                                                                                                                                        | -                               | -                            | P_trifoliata_01033_mRNA_5,1     |
| GF0051319 | 0                            | 0                         | 0                            | 1 Putative xaa-pro aminopeptidase p (1)                                  |                                                                                                                                                                                                                                                                                                                                                                               | IGR protein motif [IPRO19083] (1)                                                                                                                                      | -                               | -                            | P_trifoliata_01033_mRNA_3,1     |
| GF0051318 | 0                            | 0                         | 0                            | 1 Hypothetical protein (1)                                               | calcium ion binding [GO:0000509 molecular_function] (1)                                                                                                                                                                                                                                                                                                                       | EF-hand domain [IPRO20208] (1)                                                                                                                                         | -                               | -                            | P_trifoliata_01032_mRNA_1,1     |
| GF0051317 | 0                            | 0                         | 0                            | 1 Hypothetical protein (1)                                               |                                                                                                                                                                                                                                                                                                                                                                               |                                                                                                                                                                        | -                               | -                            | P_trifoliata_01031_mRNA_4,1     |
| GF0051316 | 0                            | 0                         | 0                            | 1 Hypothetical protein (1)                                               |                                                                                                                                                                                                                                                                                                                                                                               |                                                                                                                                                                        | -                               | -                            | P_trifoliata_01031_mRNA_1,1     |
| GF0051315 | 0                            | 0                         | 0                            | 1 Hypothetical protein (1)                                               |                                                                                                                                                                                                                                                                                                                                                                               |                                                                                                                                                                        | -                               | -                            | P_trifoliata_01030_mRNA_1,1     |
| GF0051314 | 0                            | 0                         | 0                            | 1 Hypothetical protein (1)                                               |                                                                                                                                                                                                                                                                                                                                                                               |                                                                                                                                                                        | -                               | -                            | P_trifoliata_01029_mRNA_7,1     |
| GF0051313 | 0                            | 0                         | 0                            | 1 Hypothetical protein (1)                                               |                                                                                                                                                                                                                                                                                                                                                                               |                                                                                                                                                                        | -                               | -                            | P_trifoliata_01029_mRNA_2,1     |
| GF0051312 | 0                            | 0                         | 0                            | 1 Hypothetical protein (1)                                               |                                                                                                                                                                                                                                                                                                                                                                               | Domain of unknown function DUF4216 [IPRO25312] (1)                                                                                                                     | -                               | -                            | P_trifoliata_01027_mRNA_8,1     |
| GF0051311 | 0                            | 0                         | 0                            | 1 Hypothetical protein (1)                                               | proteolysis [GO:0006508 biological_process] (1); cysteine-type peptidase activity [GO:0008234 molecular_function] (1)                                                                                                                                                                                                                                                         | Ulp1 protease family, C-terminal catalytic domain [IPRO03653] (1)                                                                                                      | -                               | -                            | P_trifoliata_01027_mRNA_6,1     |
| GF0051310 | 0                            | 0                         | 0                            | 1 Hypothetical protein (1)                                               | oxidation-reduction process [GO:0055114 biological_process] (1); oxidoreductase activity [GO:0016491 molecular_function] (1)                                                                                                                                                                                                                                                  | FAD/NAD(P)-binding domain [IPRO23753] (1)                                                                                                                              | -                               | -                            | P_trifoliata_01027_mRNA_4,1     |
| GF0051309 | 0                            | 0                         | 0                            | 1 Hypothetical protein (1)                                               | oxidation-reduction process [GO:0055114 biological_process] (1); oxidoreductase activity [GO:0016491 molecular_function] (1)                                                                                                                                                                                                                                                  | FAD/NAD(P)-binding domain [IPRO23753] (1)                                                                                                                              | -                               | -                            | P_trifoliata_01027_mRNA_3,1     |
| GF0051308 | 0                            | 0                         | 0                            | 1 Salicylate 1-monoxygenase (1)                                          | FAD binding [GO:0071949 molecular_function] (1); oxidoreductase activity [GO:0016491 molecular_function] (1); oxidation-reduction process [GO:0055114 biological_process] (1)                                                                                                                                                                                                 | FAD-binding domain [IPRO02938] (1); FAD/NAD(P)-binding domain [IPRO23753] (1)                                                                                          | -                               | -                            | P_trifoliata_01027_mRNA_2,1     |
| GF0051307 | 0                            | 0                         | 0                            | 1 Hypothetical protein (1)                                               |                                                                                                                                                                                                                                                                                                                                                                               |                                                                                                                                                                        | -                               | -                            | P_trifoliata_01025_mRNA_2,1     |
| GF0051306 | 0                            | 0                         | 0                            | 1 Hypothetical protein (1)                                               |                                                                                                                                                                                                                                                                                                                                                                               |                                                                                                                                                                        | -                               | -                            | P_trifoliata_01025_mRNA_1,1     |
| GF0051305 | 0                            | 0                         | 0                            | 1 Hypothetical protein (1)                                               |                                                                                                                                                                                                                                                                                                                                                                               |                                                                                                                                                                        | -                               | -                            | P_trifoliata_01024_mRNA_7,1     |
| GF0051304 | 0                            | 0                         | 0                            | 1 Hypothetical protein (1)                                               |                                                                                                                                                                                                                                                                                                                                                                               |                                                                                                                                                                        | -                               | -                            | P_trifoliata_01024_mRNA_6,1     |
| GF0051303 | 0                            | 0                         | 0                            | 1 Histone H3 (1)                                                         | nucleosome [GO:0000786 cellular_component] (1); protein heterodimerization activity [GO:0046982 molecular_function] (1); DNA binding [GO:0003677 molecular_function] (1)                                                                                                                                                                                                      | Histone H2A/H2B/H3 [IPRO07125] (1); Histone H3/CENP-A [IPRO00164] (1); Histone-fold [IPRO09072] (1)                                                                    | -                               | -                            | P_trifoliata_01024_mRNA_4,1     |
| GF0051302 | 0                            | 0                         | 0                            | 1 CDNA clone:002-110-H12, full insert sequence (1)                       | DNA binding [GO:0003677 molecular_function] (1); nucleic acid binding [GO:0000676 molecular_function] (1)                                                                                                                                                                                                                                                                     | hAT-like transposase, RNase-H fold [IPRO25525] (1); Ribonuclease H-like domain [IPRO12337] (1)                                                                         | -                               | -                            | P_trifoliata_01024_mRNA_3,1     |
| GF0051301 | 0                            | 0                         | 0                            | 1 Hypothetical protein (1)                                               |                                                                                                                                                                                                                                                                                                                                                                               | GAG-pre-integrase domain [IPRO25724] (1)                                                                                                                               | -                               | -                            | P_trifoliata_01023_mRNA_3,1     |
| GF0051300 | 0                            | 0                         | 0                            | 1 Hypothetical protein (1)                                               |                                                                                                                                                                                                                                                                                                                                                                               |                                                                                                                                                                        | -                               | -                            | P_trifoliata_01023_mRNA_1,1     |
| GF0051299 | 0                            | 0                         | 0                            | 1 Hypothetical protein (1)                                               |                                                                                                                                                                                                                                                                                                                                                                               |                                                                                                                                                                        | -                               | -                            | P_trifoliata_01021_mRNA_9,1     |
| GF0051298 | 0                            | 0                         | 0                            | 1 Hypothetical protein (1)                                               |                                                                                                                                                                                                                                                                                                                                                                               |                                                                                                                                                                        | -                               | -                            | P_trifoliata_01021_mRNA_6,1     |
| GF0051297 | 0                            | 0                         | 0                            | 1 Hypothetical protein (1)                                               | ATP binding [GO:0005524 molecular_function] (1); ATPase activity [GO:0016887 molecular_function] (1)                                                                                                                                                                                                                                                                          | P-loop containing nucleoside triphosphate hydrolase [IPRO27417] (1); ABC transporter-like [IPRO03439] (1)                                                              | -                               | -                            | P_trifoliata_01019_mRNA_1,1     |
| GF0051296 | 0                            | 0                         | 0                            | 1 Hypothetical protein (1)                                               |                                                                                                                                                                                                                                                                                                                                                                               |                                                                                                                                                                        | -                               | -                            | P_trifoliata_01018_mRNA_4,1     |
| GF0051295 | 0                            | 0                         | 0                            | 1 Hypothetical protein (1)                                               | zinc ion binding [GO:0008270 molecular_function] (1); nucleic acid binding [GO:0003676 molecular_function] (1)                                                                                                                                                                                                                                                                | Zinc finger, CCHC-type [IPRO01878] (1)                                                                                                                                 | -                               | -                            | P_trifoliata_01018_mRNA_2,1     |
| GF0051294 | 0                            | 0                         | 0                            | 1 Hypothetical protein (1)                                               |                                                                                                                                                                                                                                                                                                                                                                               |                                                                                                                                                                        | -                               | -                            | P_trifoliata_01017_mRNA_6,1     |
| GF0051293 | 0                            | 0                         | 0                            | 1 Putative ribonuclease H protein (1)                                    |                                                                                                                                                                                                                                                                                                                                                                               | Reverse transcriptase zinc-binding domain [IPRO26960] (1)                                                                                                              | -                               | -                            | P_trifoliata_01017_mRNA_3,1     |
| GF0051292 | 0                            | 0                         | 0                            | 1 Hypothetical protein (1)                                               |                                                                                                                                                                                                                                                                                                                                                                               |                                                                                                                                                                        | -                               | -                            | P_trifoliata_01017_mRNA_2,1     |
| GF0051291 | 0                            | 0                         | 0                            | 1 Hypothetical protein (1)                                               |                                                                                                                                                                                                                                                                                                                                                                               |                                                                                                                                                                        | -                               | -                            | P_trifoliata_01016_mRNA_9,1     |
| GF0051290 | 0                            | 0                         | 0                            | 1 Hypothetical protein (1)                                               |                                                                                                                                                                                                                                                                                                                                                                               |                                                                                                                                                                        | -                               | -                            | P_trifoliata_01016_mRNA_8,1     |
| GF0051289 | 0                            | 0                         | 0                            | 1 Hypothetical protein (1)                                               |                                                                                                                                                                                                                                                                                                                                                                               |                                                                                                                                                                        | -                               | -                            | P_trifoliata_01016_mRNA_7,1     |
| GF0051288 | 0                            | 0                         | 0                            | 1 Hypothetical protein (1)                                               |                                                                                                                                                                                                                                                                                                                                                                               |                                                                                                                                                                        | -                               | -                            | P_trifoliata_01016_mRNA_4,1     |
| GF0051287 | 0                            | 0                         | 0                            | 1 Hypothetical protein (1)                                               |                                                                                                                                                                                                                                                                                                                                                                               | Reverse transcriptase, RNA-dependent DNA polymerase [IPRO13103] (1)                                                                                                    | -                               | -                            | P_trifoliata_01016_mRNA_2,1     |
| GF0051286 | 0                            | 0                         | 0                            | 1 Hypothetical protein (1)                                               |                                                                                                                                                                                                                                                                                                                                                                               |                                                                                                                                                                        | -                               | -                            | P_trifoliata_01013_mRNA_7,1     |
| GF0051285 | 0                            | 0                         | 0                            | 1 Hypothetical protein (1)                                               |                                                                                                                                                                                                                                                                                                                                                                               |                                                                                                                                                                        | -                               | -                            | P_trifoliata_01013_mRNA_4,1     |
| GF0051284 | 0                            | 0                         | 0                            | 1 Hypothetical protein (1)                                               |                                                                                                                                                                                                                                                                                                                                                                               | Domain of unknown function DUF4283 [IPRO25558] (1)                                                                                                                     | -                               | -                            | P_trifoliata_01013_mRNA_3,1     |
| GF0051283 | 0                            | 0                         | 0                            | 1 Hypothetical protein (1)                                               |                                                                                                                                                                                                                                                                                                                                                                               |                                                                                                                                                                        | -                               | -                            | P_trifoliata_01011_mRNA_4,1     |
| GF0051282 | 0                            | 0                         | 0                            | 1 Hypothetical protein (1)                                               |                                                                                                                                                                                                                                                                                                                                                                               |                                                                                                                                                                        | -                               | -                            | P_trifoliata_01011_mRNA_3,1     |
| GF0051281 | 0                            | 0                         | 0                            | 1 Hypothetical protein (1)                                               | zinc ion binding [GO:0008270 molecular_function] (1); oxidoreductase activity [GO:0016491 molecular_function] (1); oxidation-reduction process [GO:0055114 biological_process] (1)                                                                                                                                                                                            | NAD(P)-binding domain [IPRO16040] (1); Alcohol dehydrogenase superfamily, zinc-type [IPRO02085] (1)                                                                    | -                               | -                            | P_trifoliata_01011_mRNA_2,1     |
| GF0051280 | 0                            | 0                         | 0                            | 1 Probably inactive leucine-rich repeat receptor-like protein kinase (1) | protein binding [GO:0005515 molecular_function] (1)                                                                                                                                                                                                                                                                                                                           | Leucine-rich repeat domain, L domain-like [IPRO132675] (1); Leucine-rich repeat [IPRO01611] (1); Leucine-rich repeat-containing N-terminal, plant-type [IPRO13210] (1) | -                               | -                            | P_trifoliata_01011_mRNA_1,1     |

| ID        | Num. in <i>C. clementiae</i> | Num. in <i>C. canihii</i> | Num. in <i>P. trifoliate</i> | Note                                                            | GO                                                                                                                                                                                                                                                                                                                                                                        | InterPro                                                                                                                                                                                                                                                                           | Members in <i>C. clementiae</i> | Members in <i>C. canihii</i> | Members in <i>P. trifoliate</i> |
|-----------|------------------------------|---------------------------|------------------------------|-----------------------------------------------------------------|---------------------------------------------------------------------------------------------------------------------------------------------------------------------------------------------------------------------------------------------------------------------------------------------------------------------------------------------------------------------------|------------------------------------------------------------------------------------------------------------------------------------------------------------------------------------------------------------------------------------------------------------------------------------|---------------------------------|------------------------------|---------------------------------|
| GF0051279 | 0                            | 0                         | 1                            | Hypothetical protein (1)                                        |                                                                                                                                                                                                                                                                                                                                                                           |                                                                                                                                                                                                                                                                                    |                                 |                              | P_trifoliata_01010_mRNA_2,1     |
| GF0051278 | 0                            | 0                         | 1                            | Hypothetical protein (1)                                        |                                                                                                                                                                                                                                                                                                                                                                           |                                                                                                                                                                                                                                                                                    |                                 |                              | P_trifoliata_01009_mRNA_1,1     |
| GF0051277 | 0                            | 0                         | 1                            | Hypothetical protein (1)                                        |                                                                                                                                                                                                                                                                                                                                                                           |                                                                                                                                                                                                                                                                                    |                                 |                              | P_trifoliata_01008_mRNA_6,1     |
| GF0051276 | 0                            | 0                         | 1                            | Hypothetical protein (1)                                        |                                                                                                                                                                                                                                                                                                                                                                           |                                                                                                                                                                                                                                                                                    |                                 |                              | P_trifoliata_01008_mRNA_4,1     |
| GF0051275 | 0                            | 0                         | 1                            | Hypothetical protein (1)                                        |                                                                                                                                                                                                                                                                                                                                                                           |                                                                                                                                                                                                                                                                                    |                                 |                              | P_trifoliata_01008_mRNA_3,1     |
| GF0051274 | 0                            | 0                         | 1                            | Hypothetical protein (1)                                        |                                                                                                                                                                                                                                                                                                                                                                           |                                                                                                                                                                                                                                                                                    |                                 |                              | P_trifoliata_01008_mRNA_2,1     |
| GF0051273 | 0                            | 0                         | 1                            | Hypothetical protein (1)                                        |                                                                                                                                                                                                                                                                                                                                                                           |                                                                                                                                                                                                                                                                                    |                                 |                              | P_trifoliata_01008_mRNA_1,1     |
| GF0051272 | 0                            | 0                         | 1                            | Hypothetical protein (1)                                        |                                                                                                                                                                                                                                                                                                                                                                           |                                                                                                                                                                                                                                                                                    |                                 |                              | P_trifoliata_01007_mRNA_5,1     |
| GF0051271 | 0                            | 0                         | 1                            | Hypothetical protein (1)                                        |                                                                                                                                                                                                                                                                                                                                                                           |                                                                                                                                                                                                                                                                                    |                                 |                              | P_trifoliata_01007_mRNA_3,1     |
| GF0051270 | 0                            | 0                         | 1                            | Hypothetical protein (1)                                        |                                                                                                                                                                                                                                                                                                                                                                           | Pentatricopeptide repeat [IPR020885] (1)                                                                                                                                                                                                                                           |                                 |                              | P_trifoliata_01006_mRNA_5,1     |
| GF0051269 | 0                            | 0                         | 1                            | Pentatricopeptide repeat-containing protein, chloroplastic (1)  |                                                                                                                                                                                                                                                                                                                                                                           | Pentatricopeptide repeat [IPR020885] (1)                                                                                                                                                                                                                                           |                                 |                              | P_trifoliata_01006_mRNA_4,1     |
| GF0051268 | 0                            | 0                         | 1                            | Hypothetical protein (1)                                        |                                                                                                                                                                                                                                                                                                                                                                           |                                                                                                                                                                                                                                                                                    |                                 |                              | P_trifoliata_01006_mRNA_2,1     |
| GF0051267 | 0                            | 0                         | 1                            | Hypothetical protein (1)                                        |                                                                                                                                                                                                                                                                                                                                                                           |                                                                                                                                                                                                                                                                                    |                                 |                              | P_trifoliata_01006_mRNA_1,1     |
| GF0051266 | 0                            | 0                         | 1                            | Hypothetical protein (1)                                        |                                                                                                                                                                                                                                                                                                                                                                           |                                                                                                                                                                                                                                                                                    |                                 |                              | P_trifoliata_01005_mRNA_5,1     |
| GF0051265 | 0                            | 0                         | 1                            | Hypothetical protein (1)                                        |                                                                                                                                                                                                                                                                                                                                                                           |                                                                                                                                                                                                                                                                                    |                                 |                              | P_trifoliata_01005_mRNA_4,1     |
| GF0051264 | 0                            | 0                         | 1                            | Hypothetical protein (1)                                        | protein dimerization activity [GO:004693 molecular_function] (1); O-methyltransferase activity [GO:0008171 molecular_function] (1); methyltransferase activity [GO:0008168 molecular_function] (1)                                                                                                                                                                        | S-adenosyl-L-methionine-dependent methyltransferase [IPR020603] (1); O-methyltransferase, family 2 [IPR01077] (1); Winged helix-turn-helix DNA-binding domain [IPR011991] (1); O-methyltransferase COMT-type [IPR016461] (1); Plant methyltransferase dimerization [IPR012967] (1) |                                 |                              | P_trifoliata_01005_mRNA_1,1     |
| GF0051263 | 0                            | 0                         | 1                            | Hypothetical protein (1)                                        |                                                                                                                                                                                                                                                                                                                                                                           |                                                                                                                                                                                                                                                                                    |                                 |                              | P_trifoliata_01004_mRNA_3,1     |
| GF0051262 | 0                            | 0                         | 1                            | Hypothetical protein (1)                                        |                                                                                                                                                                                                                                                                                                                                                                           |                                                                                                                                                                                                                                                                                    |                                 |                              | P_trifoliata_01004_mRNA_2,1     |
| GF0051261 | 0                            | 0                         | 1                            | Hypothetical protein (1)                                        |                                                                                                                                                                                                                                                                                                                                                                           |                                                                                                                                                                                                                                                                                    |                                 |                              | P_trifoliata_01004_mRNA_1,1     |
| GF0051260 | 0                            | 0                         | 1                            | Hypothetical protein (1)                                        |                                                                                                                                                                                                                                                                                                                                                                           |                                                                                                                                                                                                                                                                                    |                                 |                              | P_trifoliata_01003_mRNA_4,1     |
| GF0051259 | 0                            | 0                         | 1                            | Hypothetical protein (1)                                        |                                                                                                                                                                                                                                                                                                                                                                           |                                                                                                                                                                                                                                                                                    |                                 |                              | P_trifoliata_01003_mRNA_3,1     |
| GF0051258 | 0                            | 0                         | 1                            | Hypothetical protein (1)                                        |                                                                                                                                                                                                                                                                                                                                                                           |                                                                                                                                                                                                                                                                                    |                                 |                              | P_trifoliata_01003_mRNA_2,1     |
| GF0051257 | 0                            | 0                         | 1                            | Hypothetical protein (1)                                        |                                                                                                                                                                                                                                                                                                                                                                           |                                                                                                                                                                                                                                                                                    |                                 |                              | P_trifoliata_01000_mRNA_4,1     |
| GF0051256 | 0                            | 0                         | 1                            | Hypothetical protein (1)                                        |                                                                                                                                                                                                                                                                                                                                                                           |                                                                                                                                                                                                                                                                                    |                                 |                              | P_trifoliata_00999_mRNA_7,1     |
| GF0051255 | 0                            | 0                         | 1                            | Hypothetical protein (1)                                        |                                                                                                                                                                                                                                                                                                                                                                           | PGG domain [IPR026961] (1)                                                                                                                                                                                                                                                         |                                 |                              | P_trifoliata_00999_mRNA_6,1     |
| GF0051254 | 0                            | 0                         | 1                            | Hypothetical protein (1)                                        |                                                                                                                                                                                                                                                                                                                                                                           | Ankyrin repeat-containing domain [IPR020683] (1); PGG domain [IPR026961] (1)                                                                                                                                                                                                       |                                 |                              | P_trifoliata_00999_mRNA_5,1     |
| GF0051253 | 0                            | 0                         | 1                            | Hypothetical protein (1)                                        |                                                                                                                                                                                                                                                                                                                                                                           | ANKYRIN repeat [IPR026961] (1); PGG domain [IPR020683] (1); Ankyrin repeat-containing domain [IPR020683] (1)                                                                                                                                                                       |                                 |                              | P_trifoliata_00999_mRNA_4,1     |
| GF0051252 | 0                            | 0                         | 1                            | Ankyrin repeat plant-like protein (1)                           | protein binding [GO:0005515 molecular_function] (1)                                                                                                                                                                                                                                                                                                                       | Ankyrin repeat-containing domain [IPR020683] (1)                                                                                                                                                                                                                                   |                                 |                              | P_trifoliata_00999_mRNA_3,1     |
| GF0051251 | 0                            | 0                         | 1                            | Hypothetical protein (1)                                        |                                                                                                                                                                                                                                                                                                                                                                           |                                                                                                                                                                                                                                                                                    |                                 |                              | P_trifoliata_00999_mRNA_2,1     |
| GF0051250 | 0                            | 0                         | 1                            | Neurofilament heavy protein, putative (1)                       |                                                                                                                                                                                                                                                                                                                                                                           |                                                                                                                                                                                                                                                                                    |                                 |                              | P_trifoliata_00999_mRNA_1,1     |
| GF0051249 | 0                            | 0                         | 1                            | Hypothetical protein (1)                                        |                                                                                                                                                                                                                                                                                                                                                                           |                                                                                                                                                                                                                                                                                    |                                 |                              | P_trifoliata_00998_mRNA_4,1     |
| GF0051248 | 0                            | 0                         | 1                            | Hypothetical protein (1)                                        |                                                                                                                                                                                                                                                                                                                                                                           |                                                                                                                                                                                                                                                                                    |                                 |                              | P_trifoliata_00998_mRNA_1,1     |
| GF0051247 | 0                            | 0                         | 1                            | RING FYVE/PHD zinc finger superfamily protein isoform 1 (1)     | zinc ion binding [GO:0008270 molecular_function] (1)                                                                                                                                                                                                                                                                                                                      | Zinc finger, RING FYVE/PHD-type [IPR013083] (1); Zinc finger, RING-CH-type [IPR010161] (1)                                                                                                                                                                                         |                                 |                              | P_trifoliata_00997_mRNA_4,1     |
| GF0051246 | 0                            | 0                         | 1                            | Hypothetical protein (1)                                        | metal ion binding [GO:0046872 molecular_function] (1); metal ion transport [GO:0030001 biological_process] (1)                                                                                                                                                                                                                                                            | Heavy metal-associated domain, HMA [IPR006121] (1)                                                                                                                                                                                                                                 |                                 |                              | P_trifoliata_00996_mRNA_2,1     |
| GF0051245 | 0                            | 0                         | 1                            | Hypothetical protein (1)                                        |                                                                                                                                                                                                                                                                                                                                                                           |                                                                                                                                                                                                                                                                                    |                                 |                              | P_trifoliata_00995_mRNA_4,1     |
| GF0051244 | 0                            | 0                         | 1                            | Hypothetical protein (1)                                        |                                                                                                                                                                                                                                                                                                                                                                           | Domain of unknown function DUF4219 [IPR025314] (1)                                                                                                                                                                                                                                 |                                 |                              | P_trifoliata_00995_mRNA_3,1     |
| GF0051243 | 0                            | 0                         | 1                            | Hypothetical protein (1)                                        |                                                                                                                                                                                                                                                                                                                                                                           | Domain of unknown function DUF4283 [IPR025558] (1)                                                                                                                                                                                                                                 |                                 |                              | P_trifoliata_00994_mRNA_1,1     |
| GF0051242 | 0                            | 0                         | 1                            | Hypothetical protein (1)                                        |                                                                                                                                                                                                                                                                                                                                                                           |                                                                                                                                                                                                                                                                                    |                                 |                              | P_trifoliata_00992_mRNA_8,1     |
| GF0051241 | 0                            | 0                         | 1                            | Hypothetical protein (1)                                        |                                                                                                                                                                                                                                                                                                                                                                           |                                                                                                                                                                                                                                                                                    |                                 |                              | P_trifoliata_00992_mRNA_6,1     |
| GF0051240 | 0                            | 0                         | 1                            | Hypothetical protein (1)                                        |                                                                                                                                                                                                                                                                                                                                                                           |                                                                                                                                                                                                                                                                                    |                                 |                              | P_trifoliata_00992_mRNA_5,1     |
| GF0051239 | 0                            | 0                         | 1                            | Hypothetical protein (1)                                        |                                                                                                                                                                                                                                                                                                                                                                           |                                                                                                                                                                                                                                                                                    |                                 |                              | P_trifoliata_00992_mRNA_4,1     |
| GF0051238 | 0                            | 0                         | 1                            | Polyamine oxidase 1-like protein (1)                            | oxidation-reduction process [GO:005114 biological_process] (1); oxidoreductase activity [GO:0016491 molecular_function] (1)                                                                                                                                                                                                                                               | FAD/NAD(P)-binding domain [IPR023753] (1); Amine oxidase [IPR002937] (1)                                                                                                                                                                                                           |                                 |                              | P_trifoliata_00991_mRNA_7,1     |
| GF0051237 | 0                            | 0                         | 1                            | Hypothetical protein (1)                                        |                                                                                                                                                                                                                                                                                                                                                                           | NAD(P)-binding domain [IPR016040] (1)                                                                                                                                                                                                                                              |                                 |                              | P_trifoliata_00991_mRNA_5,1     |
| GF0051236 | 0                            | 0                         | 1                            | Structural constituent of ribosome, putative (1)                |                                                                                                                                                                                                                                                                                                                                                                           | Uncharacterised protein family UPF0114 [IPR005134] (1)                                                                                                                                                                                                                             |                                 |                              | P_trifoliata_00991_mRNA_2,1     |
| GF0051235 | 0                            | 0                         | 1                            | Hypothetical protein (1)                                        | DNA binding [GO:0003677 molecular_function] (1); regulation of transcription, DNA-templated [GO:0006355 biological_process] (1); DNA-templated transcription, initiation [GO:0006352 biological_process] (1); sigma factor activity [GO:0016987 molecular_function] (1); transcription factor activity, sequence-specific DNA binding [GO:0003700 molecular_function] (1) | Winged helix-turn-helix DNA-binding domain [IPR011991] (1); RNA polymerase sigma-70 region 3 [IPR007624] (1); RNA polymerase sigma factor, region 3/4 [IPR013324] (1); RNA polymerase sigma factor, region 2 [IPR013325] (1); RNA polymerase sigma-70 region 2 [IPR007627] (1)     |                                 |                              | P_trifoliata_00991_mRNA_1,1     |
| GF0051234 | 0                            | 0                         | 1                            | DNA-(apurinic or apyrimidinic site) lyase (1)                   | nuclease activity [GO:0004518 molecular_function] (1); DNA repair [GO:0006281 biological_process] (1)                                                                                                                                                                                                                                                                     | AP endonuclease 1 [IPR004808] (1); Endonuclease/exonuclease/phosphatase [IPR005135] (1)                                                                                                                                                                                            |                                 |                              | P_trifoliata_00990_mRNA_6,1     |
| GF0051233 | 0                            | 0                         | 1                            | Hypothetical protein (1)                                        |                                                                                                                                                                                                                                                                                                                                                                           |                                                                                                                                                                                                                                                                                    |                                 |                              | P_trifoliata_00990_mRNA_5,1     |
| GF0051232 | 0                            | 0                         | 1                            | Hypothetical protein (1)                                        |                                                                                                                                                                                                                                                                                                                                                                           |                                                                                                                                                                                                                                                                                    |                                 |                              | P_trifoliata_00990_mRNA_1,1     |
| GF0051231 | 0                            | 0                         | 1                            | Short-chain dehydrogenase TIC 32, chloroplastic (1)             | metabolic process [GO:0008152 biological_process] (1); oxidoreductase activity [GO:0016491 molecular_function] (1)                                                                                                                                                                                                                                                        | Short-chain dehydrogenase/reductase SDR [IPR021198] (1); Glucose/ribose dehydrogenase [IPR020471] (1); NAD(P)-binding domain [IPR016040] (1)                                                                                                                                       |                                 |                              | P_trifoliata_00989_mRNA_7,1     |
| GF0051230 | 0                            | 0                         | 1                            | Transcription factor (1)                                        |                                                                                                                                                                                                                                                                                                                                                                           | DNA-binding pseudoborel domain [IPR015300] (1)                                                                                                                                                                                                                                     |                                 |                              | P_trifoliata_00989_mRNA_6,1     |
| GF0051229 | 0                            | 0                         | 1                            | Hypothetical protein (1)                                        |                                                                                                                                                                                                                                                                                                                                                                           |                                                                                                                                                                                                                                                                                    |                                 |                              | P_trifoliata_00989_mRNA_4,1     |
| GF0051228 | 0                            | 0                         | 1                            | Hypothetical protein (1)                                        |                                                                                                                                                                                                                                                                                                                                                                           |                                                                                                                                                                                                                                                                                    |                                 |                              | P_trifoliata_00988_mRNA_3,1     |
| GF0051227 | 0                            | 0                         | 1                            | Hypothetical protein (1)                                        | cysteine-type peptidase activity [GO:0008234 molecular_function] (1); proteolysis [GO:0006508 biological_process] (1)                                                                                                                                                                                                                                                     | Ulp1 protease family, C-terminal catalytic domain [IPR005652] (1)                                                                                                                                                                                                                  |                                 |                              | P_trifoliata_00988_mRNA_2,1     |
| GF0051226 | 0                            | 0                         | 1                            | Hypothetical protein (1)                                        |                                                                                                                                                                                                                                                                                                                                                                           |                                                                                                                                                                                                                                                                                    |                                 |                              | P_trifoliata_00986_mRNA_3,1     |
| GF0051225 | 0                            | 0                         | 1                            | Hypothetical protein (1)                                        |                                                                                                                                                                                                                                                                                                                                                                           |                                                                                                                                                                                                                                                                                    |                                 |                              | P_trifoliata_00986_mRNA_2,1     |
| GF0051224 | 0                            | 0                         | 1                            | Hypothetical protein (1)                                        | zinc ion binding [GO:0008270 molecular_function] (1); nucleic acid binding [GO:0003676 molecular_function] (1)                                                                                                                                                                                                                                                            | Zinc finger, CCHC-type [IPR001878] (1); Zinc knuckle CX3CX4HX4C [IPR025303] (1)                                                                                                                                                                                                    |                                 |                              | P_trifoliata_00986_mRNA_1,1     |
| GF0051223 | 0                            | 0                         | 1                            | Hypothetical protein (1)                                        |                                                                                                                                                                                                                                                                                                                                                                           |                                                                                                                                                                                                                                                                                    |                                 |                              | P_trifoliata_00984_mRNA_4,1     |
| GF0051222 | 0                            | 0                         | 1                            | Putative cyclic nucleotide-gated ion channel 17 (1)             |                                                                                                                                                                                                                                                                                                                                                                           | RanC-like jelly roll fold [IPR014710] (1); Cyclic nucleotide-binding-like [IPR018490] (1); Cyclic nucleotide-binding domain [IPR000595] (1)                                                                                                                                        |                                 |                              | P_trifoliata_00984_mRNA_2,1     |
| GF0051221 | 0                            | 0                         | 1                            | Cyclic nucleotide-gated calmodulin-binding ion channel-like (1) |                                                                                                                                                                                                                                                                                                                                                                           | Cyclic nucleotide-binding domain [IPR000595] (1); RanC-like jelly roll fold [IPR014710] (1); Cyclic nucleotide-binding-like [IPR018490] (1)                                                                                                                                        |                                 |                              | P_trifoliata_00984_mRNA_1,1     |
| GF0051220 | 0                            | 0                         | 1                            | Hypothetical protein (1)                                        |                                                                                                                                                                                                                                                                                                                                                                           |                                                                                                                                                                                                                                                                                    |                                 |                              | P_trifoliata_00983_mRNA_5,1     |
| GF0051219 | 0                            | 0                         | 1                            | Hypothetical protein (1)                                        |                                                                                                                                                                                                                                                                                                                                                                           |                                                                                                                                                                                                                                                                                    |                                 |                              | P_trifoliata_00983_mRNA_4,1     |
| GF0051218 | 0                            | 0                         | 1                            | Hypothetical protein (1)                                        |                                                                                                                                                                                                                                                                                                                                                                           |                                                                                                                                                                                                                                                                                    |                                 |                              | P_trifoliata_00983_mRNA_1,1     |
| GF0051217 | 0                            | 0                         | 1                            | Hypothetical protein (1)                                        |                                                                                                                                                                                                                                                                                                                                                                           |                                                                                                                                                                                                                                                                                    |                                 |                              | P_trifoliata_00981_mRNA_2,1     |
| GF0051216 | 0                            | 0                         | 1                            | Hypothetical protein (1)                                        |                                                                                                                                                                                                                                                                                                                                                                           |                                                                                                                                                                                                                                                                                    |                                 |                              | P_trifoliata_00980_mRNA_3,1     |
| GF0051215 | 0                            | 0                         | 1                            | Mechanosensitive ion channel 10-like protein (1)                | membrane [GO:0016020 cellular_component] (1); transmembrane transport [GO:0050508 biological_process] (1)                                                                                                                                                                                                                                                                 | Mechanosensitive ion channel MscS [IPR006685] (1)                                                                                                                                                                                                                                  |                                 |                              | P_trifoliata_00979_mRNA_7,1     |
| GF0051214 | 0                            | 0                         | 1                            | Hypothetical protein (1)                                        |                                                                                                                                                                                                                                                                                                                                                                           |                                                                                                                                                                                                                                                                                    |                                 |                              | P_trifoliata_00979_mRNA_5,1     |
| GF0051213 | 0                            | 0                         | 1                            | Hypothetical protein (1)                                        |                                                                                                                                                                                                                                                                                                                                                                           |                                                                                                                                                                                                                                                                                    |                                 |                              | P_trifoliata_00979_mRNA_4,1     |
| GF0051212 | 0                            | 0                         | 1                            | Mechanosensitive ion channel domain-containing protein-like (1) |                                                                                                                                                                                                                                                                                                                                                                           |                                                                                                                                                                                                                                                                                    |                                 |                              | P_trifoliata_00979_mRNA_3,1     |
| GF0051211 | 0                            | 0                         | 1                            | Hypothetical protein (1)                                        | protein kinase activity [GO:0004672 molecular_function] (1); protein phosphorylation [GO:0006468 biological_process] (1); ATP binding [GO:0005524 molecular_function] (1)                                                                                                                                                                                                 | Protein kinase-like domain [IPR011009] (1); Protein kinase domain [IPR000179] (1)                                                                                                                                                                                                  |                                 |                              | P_trifoliata_00979_mRNA_2,1     |
| GF0051210 | 0                            | 0                         | 1                            | Hypothetical protein (1)                                        | response to stress [GO:0006950 biological_process] (1)                                                                                                                                                                                                                                                                                                                    | Late embryogenesis abundant protein, LEA-5-type [IPR008026] (1)                                                                                                                                                                                                                    |                                 |                              | P_trifoliata_00978_mRNA_5,1     |
| GF0051209 | 0                            | 0                         | 1                            | Hypothetical protein (1)                                        |                                                                                                                                                                                                                                                                                                                                                                           | Leucine-rich repeat domain, L domain-like [IPR032675] (1)                                                                                                                                                                                                                          |                                 |                              | P_trifoliata_00978_mRNA_3,1     |
| GF0051208 | 0                            | 0                         | 1                            | RPS2 protein (1)                                                | ADP binding [GO:0043531 molecular_function] (1); protein binding [GO:0005515 molecular_function] (1)                                                                                                                                                                                                                                                                      | Leucine-rich repeat domain, L domain-like [IPR032675] (1); P-loop containing nucleoside triphosphate hydrolase [IPR027417] (1); NB-ARC [IPR002182] (1); Leucine-rich repeat [IPR001611] (1)                                                                                        |                                 |                              | P_trifoliata_00978_mRNA_2,1     |
| GF0051207 | 0                            | 0                         | 1                            | Hypothetical protein (1)                                        |                                                                                                                                                                                                                                                                                                                                                                           |                                                                                                                                                                                                                                                                                    |                                 |                              | P_trifoliata_00976_mRNA_5,1     |
| GF0051206 | 0                            | 0                         | 1                            | Integrase (1)                                                   |                                                                                                                                                                                                                                                                                                                                                                           | Aspartic peptidase domain [IPR021109] (1)                                                                                                                                                                                                                                          |                                 |                              | P_trifoliata_00976_mRNA_4,1     |
| GF0051205 | 0                            | 0                         | 1                            | Hypothetical protein (1)                                        |                                                                                                                                                                                                                                                                                                                                                                           |                                                                                                                                                                                                                                                                                    |                                 |                              | P_trifoliata_00976_mRNA_2,1     |
| GF0051204 | 0                            | 0                         | 1                            | Hypothetical protein (1)                                        |                                                                                                                                                                                                                                                                                                                                                                           |                                                                                                                                                                                                                                                                                    |                                 |                              | P_trifoliata_00976_mRNA_1,1     |

| ID        | Num. in <i>C. clementiae</i> | Num. in <i>C. canihii</i> | Num. in <i>P. trifoliata</i> | Note                                          | GO                                                                                                                                                                                                                                                                                                                | InterPro                                                                                                                                                                                                                                                                                      | Members in <i>C. clementiae</i> | Members in <i>C. canihii</i> | Members in <i>P. trifoliata</i> |
|-----------|------------------------------|---------------------------|------------------------------|-----------------------------------------------|-------------------------------------------------------------------------------------------------------------------------------------------------------------------------------------------------------------------------------------------------------------------------------------------------------------------|-----------------------------------------------------------------------------------------------------------------------------------------------------------------------------------------------------------------------------------------------------------------------------------------------|---------------------------------|------------------------------|---------------------------------|
| GF0051203 | 0                            | 0                         | 0                            | 1 Hypothetical protein (1)                    |                                                                                                                                                                                                                                                                                                                   |                                                                                                                                                                                                                                                                                               | -                               | -                            | P_trifoliata_00975_mRNA_1,1     |
| GF0051202 | 0                            | 0                         | 0                            | 1 Hypothetical protein (1)                    |                                                                                                                                                                                                                                                                                                                   |                                                                                                                                                                                                                                                                                               | -                               | -                            | P_trifoliata_00974_mRNA_7,1     |
| GF0051201 | 0                            | 0                         | 0                            | 1 Hypothetical protein (1)                    |                                                                                                                                                                                                                                                                                                                   |                                                                                                                                                                                                                                                                                               | -                               | -                            | P_trifoliata_00974_mRNA_6,1     |
| GF0051200 | 0                            | 0                         | 0                            | 1 Hypothetical protein (1)                    |                                                                                                                                                                                                                                                                                                                   |                                                                                                                                                                                                                                                                                               | -                               | -                            | P_trifoliata_00973_mRNA_6,1     |
| GF0051199 | 0                            | 0                         | 0                            | 1 Hypothetical protein (1)                    |                                                                                                                                                                                                                                                                                                                   |                                                                                                                                                                                                                                                                                               | -                               | -                            | P_trifoliata_00973_mRNA_5,1     |
| GF0051198 | 0                            | 0                         | 0                            | 1 Hypothetical protein (1)                    |                                                                                                                                                                                                                                                                                                                   |                                                                                                                                                                                                                                                                                               | -                               | -                            | P_trifoliata_00973_mRNA_3,1     |
| GF0051197 | 0                            | 0                         | 0                            | 1 Hypothetical protein (1)                    |                                                                                                                                                                                                                                                                                                                   |                                                                                                                                                                                                                                                                                               | -                               | -                            | P_trifoliata_00973_mRNA_2,1     |
| GF0051196 | 0                            | 0                         | 0                            | 1 Hypothetical protein (1)                    |                                                                                                                                                                                                                                                                                                                   |                                                                                                                                                                                                                                                                                               | -                               | -                            | P_trifoliata_00972_mRNA_3,1     |
| GF0051195 | 0                            | 0                         | 0                            | 1 Hypothetical protein (1)                    |                                                                                                                                                                                                                                                                                                                   |                                                                                                                                                                                                                                                                                               | -                               | -                            | P_trifoliata_00972_mRNA_2,1     |
| GF0051194 | 0                            | 0                         | 0                            | 1 Hypothetical protein (1)                    |                                                                                                                                                                                                                                                                                                                   |                                                                                                                                                                                                                                                                                               | -                               | -                            | P_trifoliata_00971_mRNA_3,1     |
| GF0051193 | 0                            | 0                         | 0                            | 1 Hypothetical protein (1)                    |                                                                                                                                                                                                                                                                                                                   |                                                                                                                                                                                                                                                                                               | -                               | -                            | P_trifoliata_00971_mRNA_2,1     |
| GF0051192 | 0                            | 0                         | 0                            | 1 Hypothetical protein (1)                    |                                                                                                                                                                                                                                                                                                                   |                                                                                                                                                                                                                                                                                               | -                               | -                            | P_trifoliata_00971_mRNA_1,1     |
| GF0051191 | 0                            | 0                         | 0                            | 1 Hypothetical protein (1)                    |                                                                                                                                                                                                                                                                                                                   |                                                                                                                                                                                                                                                                                               | -                               | -                            | P_trifoliata_00970_mRNA_1,1     |
| GF0051190 | 0                            | 0                         | 0                            | 1 Cytochrome P450 82A4 (1)                    | oxidoreductase activity, acting on paired donors, with incorporation or reduction of molecular oxygen [GO:0016705 molecular_function] (1); oxidation-reduction process [GO:005514 biological_process] (1); iron ion binding [GO:0005506 molecular_function] (1); heme binding [GO:0020037 molecular_function] (1) | Cytochrome P450, E-class, group I [IPR02401] (1); Cytochrome P450, conserved site [IPR017972] (1); Cytochrome P450 [IPR001128] (1)                                                                                                                                                            | -                               | -                            | P_trifoliata_00969_mRNA_6,1     |
| GF0051189 | 0                            | 0                         | 0                            | 1 Hypothetical protein (1)                    |                                                                                                                                                                                                                                                                                                                   |                                                                                                                                                                                                                                                                                               | -                               | -                            | P_trifoliata_00969_mRNA_4,1     |
| GF0051188 | 0                            | 0                         | 0                            | 1 Hypothetical protein (1)                    | ribosome [GO:0005840 cellular_component] (1); translation [GO:0006412 biological_process] (1); intracellular [GO:0005622 cellular_component] (1); structural constituent of ribosome [GO:0003735 molecular_function] (1)                                                                                          | Ribosomal protein S26e [IPR000892] (1)                                                                                                                                                                                                                                                        | -                               | -                            | P_trifoliata_00969_mRNA_2,1     |
| GF0051187 | 0                            | 0                         | 0                            | 1 Hypothetical protein (1)                    | oxidoreductase activity, acting on paired donors, with incorporation or reduction of molecular oxygen [GO:0016705 molecular_function] (1); oxidation-reduction process [GO:005514 biological_process] (1); iron ion binding [GO:0005506 molecular_function] (1); heme binding [GO:0020037 molecular_function] (1) | Cytochrome P450 [IPR001128] (1)                                                                                                                                                                                                                                                               | -                               | -                            | P_trifoliata_00969_mRNA_1,1     |
| GF0051186 | 0                            | 0                         | 0                            | 1 Hypothetical protein (1)                    |                                                                                                                                                                                                                                                                                                                   |                                                                                                                                                                                                                                                                                               | -                               | -                            | P_trifoliata_00968_mRNA_5,1     |
| GF0051185 | 0                            | 0                         | 0                            | 1 Hypothetical protein (1)                    |                                                                                                                                                                                                                                                                                                                   |                                                                                                                                                                                                                                                                                               | -                               | -                            | P_trifoliata_00968_mRNA_1,1     |
| GF0051184 | 0                            | 0                         | 0                            | 1 Hypothetical protein (1)                    |                                                                                                                                                                                                                                                                                                                   |                                                                                                                                                                                                                                                                                               | -                               | -                            | P_trifoliata_00967_mRNA_4,1     |
| GF0051183 | 0                            | 0                         | 0                            | 1 Hypothetical protein (1)                    |                                                                                                                                                                                                                                                                                                                   | HSP20-like chaperone [IPR008978] (1)                                                                                                                                                                                                                                                          | -                               | -                            | P_trifoliata_00967_mRNA_3,1     |
| GF0051182 | 0                            | 0                         | 0                            | 1 Hypothetical protein (1)                    |                                                                                                                                                                                                                                                                                                                   |                                                                                                                                                                                                                                                                                               | -                               | -                            | P_trifoliata_00966_mRNA_3,1     |
| GF0051181 | 0                            | 0                         | 0                            | 1 Hypothetical protein (1)                    | trichose biosynthetic process [GO:005992 biological_process] (1); catalytic activity [GO:0003824 molecular_function] (1)                                                                                                                                                                                          | Trichose-phosphatase [IPR003337] (1); HAD-like domain [IPR023214] (1)                                                                                                                                                                                                                         | -                               | -                            | P_trifoliata_00965_mRNA_3,1     |
| GF0051180 | 0                            | 0                         | 0                            | 1 Hypothetical protein (1)                    |                                                                                                                                                                                                                                                                                                                   |                                                                                                                                                                                                                                                                                               | -                               | -                            | P_trifoliata_00964_mRNA_3,1     |
| GF0051179 | 0                            | 0                         | 0                            | 1 Hypothetical protein (1)                    |                                                                                                                                                                                                                                                                                                                   |                                                                                                                                                                                                                                                                                               | -                               | -                            | P_trifoliata_00964_mRNA_2,1     |
| GF0051178 | 0                            | 0                         | 0                            | 1 Terpene synthase 21, putative isoform 3 (1) | metabolic process [GO:0008152 biological_process] (1); lyase activity [GO:0016829 molecular_function] (1); terpene synthase activity [GO:0010333 molecular_function] (1); magnesium ion binding [GO:0000287 molecular_function] (1)                                                                               | Isoprenoid synthase domain [IPR008949] (1); Terpene synthase, metal-binding domain [IPR005630] (1); Terpene synthase, N-terminal domain [IPR001906] (1); Terpenoid cyclases/protein prenyltransferase alpha-alpha teroid [IPR008930] (1)                                                      | -                               | -                            | P_trifoliata_00963_mRNA_5,1     |
| GF0051177 | 0                            | 0                         | 0                            | 1 Hypothetical protein (1)                    |                                                                                                                                                                                                                                                                                                                   |                                                                                                                                                                                                                                                                                               | -                               | -                            | P_trifoliata_00963_mRNA_1,1     |
| GF0051176 | 0                            | 0                         | 0                            | 1 Hypothetical protein (1)                    |                                                                                                                                                                                                                                                                                                                   |                                                                                                                                                                                                                                                                                               | -                               | -                            | P_trifoliata_00962_mRNA_2,1     |
| GF0051175 | 0                            | 0                         | 0                            | 1 Hypothetical protein (1)                    |                                                                                                                                                                                                                                                                                                                   |                                                                                                                                                                                                                                                                                               | -                               | -                            | P_trifoliata_00961_mRNA_4,1     |
| GF0051174 | 0                            | 0                         | 0                            | 1 Caffeic acid O-methyltransferase (1)        | methyltransferase activity [GO:0008168 molecular_function] (1); O-methyltransferase activity [GO:0008171 molecular_function] (1)                                                                                                                                                                                  | O-methyltransferase, family 2 [IPR001077] (1); Winged helix-helix DNA-binding domain [IPR011991] (1); O-methyltransferase COMT-type [IPR016461] (1); S-adenosyl-L-methionine-dependent methyltransferase [IPR029063] (1)                                                                      | -                               | -                            | P_trifoliata_00961_mRNA_3,1     |
| GF0051173 | 0                            | 0                         | 0                            | 1 Cytochrome P450 83B1 (1)                    | heme binding [GO:0020037 molecular_function] (1); iron ion binding [GO:0005506 molecular_function] (1); oxidoreductase activity, acting on paired donors, with incorporation or reduction of molecular oxygen [GO:0016705 molecular_function] (1); oxidation-reduction process [GO:005514 biological_process] (1) | Cytochrome P450 [IPR001128] (1); Cytochrome P450, E-class, group I [IPR02401] (1)                                                                                                                                                                                                             | -                               | -                            | P_trifoliata_00961_mRNA_2,1     |
| GF0051172 | 0                            | 0                         | 0                            | 1 Hypothetical protein (1)                    | iron ion binding [GO:0005506 molecular_function] (1); heme binding [GO:0020037 molecular_function] (1); oxidation-reduction process [GO:005514 biological_process] (1); oxidoreductase activity, acting on paired donors, with incorporation or reduction of molecular oxygen [GO:0016705 molecular_function] (1) | Cytochrome P450 [IPR001128] (1)                                                                                                                                                                                                                                                               | -                               | -                            | P_trifoliata_00961_mRNA_1,1     |
| GF0051171 | 0                            | 0                         | 0                            | 1 Hypothetical protein (1)                    |                                                                                                                                                                                                                                                                                                                   | Brl, TBP-binding domain [IPR011665] (1)                                                                                                                                                                                                                                                       | -                               | -                            | P_trifoliata_00960_mRNA_3,1     |
| GF0051170 | 0                            | 0                         | 0                            | 1 Hypothetical protein (1)                    |                                                                                                                                                                                                                                                                                                                   |                                                                                                                                                                                                                                                                                               | -                               | -                            | P_trifoliata_00960_mRNA_1,1     |
| GF0051169 | 0                            | 0                         | 0                            | 1 Hypothetical protein (1)                    |                                                                                                                                                                                                                                                                                                                   |                                                                                                                                                                                                                                                                                               | -                               | -                            | P_trifoliata_00959_mRNA_8,1     |
| GF0051168 | 0                            | 0                         | 0                            | 1 Hypothetical protein (1)                    |                                                                                                                                                                                                                                                                                                                   |                                                                                                                                                                                                                                                                                               | -                               | -                            | P_trifoliata_00959_mRNA_7,1     |
| GF0051167 | 0                            | 0                         | 0                            | 1 Hypothetical protein (1)                    |                                                                                                                                                                                                                                                                                                                   |                                                                                                                                                                                                                                                                                               | -                               | -                            | P_trifoliata_00959_mRNA_4,1     |
| GF0051166 | 0                            | 0                         | 0                            | 1 Hypothetical protein (1)                    |                                                                                                                                                                                                                                                                                                                   |                                                                                                                                                                                                                                                                                               | -                               | -                            | P_trifoliata_00959_mRNA_3,1     |
| GF0051165 | 0                            | 0                         | 0                            | 1 Hypothetical protein (1)                    |                                                                                                                                                                                                                                                                                                                   |                                                                                                                                                                                                                                                                                               | -                               | -                            | P_trifoliata_00959_mRNA_2,1     |
| GF0051164 | 0                            | 0                         | 0                            | 1 Hypothetical protein (1)                    |                                                                                                                                                                                                                                                                                                                   |                                                                                                                                                                                                                                                                                               | -                               | -                            | P_trifoliata_00959_mRNA_1,1     |
| GF0051163 | 0                            | 0                         | 0                            | 1 NAC domain-containing protein 72 (1)        | DNA binding [GO:0003677 molecular_function] (1); regulation of transcription, DNA-templated [GO:0006355 biological_process] (1)                                                                                                                                                                                   | NAC domain [IPR003441] (1)                                                                                                                                                                                                                                                                    | -                               | -                            | P_trifoliata_00958_mRNA_3,1     |
| GF0051162 | 0                            | 0                         | 0                            | 1 Hypothetical protein (1)                    |                                                                                                                                                                                                                                                                                                                   |                                                                                                                                                                                                                                                                                               | -                               | -                            | P_trifoliata_00958_mRNA_1,1     |
| GF0051161 | 0                            | 0                         | 0                            | 1 Hypothetical protein (1)                    | DNA binding [GO:0003677 molecular_function] (1); multicellular organismal development [GO:0007275 biological_process] (1); regulation of transcription, DNA-templated [GO:0006355 biological_process] (1); transcription factor activity, sequence-specific DNA binding [GO:0003700 molecular_function] (1)       | AP2-like ethylene-responsive transcription factor [IPR031112] (1); AP2/ERF domain [IPR014711] (1); DNA-binding domain [IPR016177] (1)                                                                                                                                                         | -                               | -                            | P_trifoliata_00957_mRNA_5,1     |
| GF0051160 | 0                            | 0                         | 0                            | 1 Disease resistance protein RGA2 (1)         | ADP binding [GO:0043331 molecular_function] (1)                                                                                                                                                                                                                                                                   | P-loop containing nucleoside triphosphate hydrolase [IPR027417] (1); NB-ARC [IPR02182] (1)                                                                                                                                                                                                    | -                               | -                            | P_trifoliata_00957_mRNA_3,1     |
| GF0051159 | 0                            | 0                         | 0                            | 1 Hypothetical protein (1)                    |                                                                                                                                                                                                                                                                                                                   |                                                                                                                                                                                                                                                                                               | -                               | -                            | P_trifoliata_00957_mRNA_2,1     |
| GF0051158 | 0                            | 0                         | 0                            | 1 Hypothetical protein (1)                    |                                                                                                                                                                                                                                                                                                                   |                                                                                                                                                                                                                                                                                               | -                               | -                            | P_trifoliata_00957_mRNA_1,1     |
| GF0051157 | 0                            | 0                         | 0                            | 1 Hypothetical protein (1)                    |                                                                                                                                                                                                                                                                                                                   |                                                                                                                                                                                                                                                                                               | -                               | -                            | P_trifoliata_00956_mRNA_9,1     |
| GF0051156 | 0                            | 0                         | 0                            | 1 Hypothetical protein (1)                    |                                                                                                                                                                                                                                                                                                                   |                                                                                                                                                                                                                                                                                               | -                               | -                            | P_trifoliata_00956_mRNA_8,1     |
| GF0051155 | 0                            | 0                         | 0                            | 1 Hypothetical protein (1)                    |                                                                                                                                                                                                                                                                                                                   |                                                                                                                                                                                                                                                                                               | -                               | -                            | P_trifoliata_00956_mRNA_7,1     |
| GF0051154 | 0                            | 0                         | 0                            | 1 Hypothetical protein (1)                    |                                                                                                                                                                                                                                                                                                                   |                                                                                                                                                                                                                                                                                               | -                               | -                            | P_trifoliata_00956_mRNA_5,1     |
| GF0051153 | 0                            | 0                         | 0                            | 1 Hypothetical protein (1)                    |                                                                                                                                                                                                                                                                                                                   |                                                                                                                                                                                                                                                                                               | -                               | -                            | P_trifoliata_00956_mRNA_4,1     |
| GF0051152 | 0                            | 0                         | 0                            | 1 Hypothetical protein (1)                    |                                                                                                                                                                                                                                                                                                                   |                                                                                                                                                                                                                                                                                               | -                               | -                            | P_trifoliata_00956_mRNA_3,1     |
| GF0051151 | 0                            | 0                         | 0                            | 1 Hypothetical protein (1)                    |                                                                                                                                                                                                                                                                                                                   |                                                                                                                                                                                                                                                                                               | -                               | -                            | P_trifoliata_00956_mRNA_2,1     |
| GF0051150 | 0                            | 0                         | 0                            | 1 Hypothetical protein (1)                    |                                                                                                                                                                                                                                                                                                                   |                                                                                                                                                                                                                                                                                               | -                               | -                            | P_trifoliata_00956_mRNA_15,1    |
| GF0051149 | 0                            | 0                         | 0                            | 1 Hypothetical protein (1)                    |                                                                                                                                                                                                                                                                                                                   |                                                                                                                                                                                                                                                                                               | -                               | -                            | P_trifoliata_00956_mRNA_13,1    |
| GF0051148 | 0                            | 0                         | 0                            | 1 Hypothetical protein (1)                    |                                                                                                                                                                                                                                                                                                                   |                                                                                                                                                                                                                                                                                               | -                               | -                            | P_trifoliata_00956_mRNA_10,1    |
| GF0051147 | 0                            | 0                         | 0                            | 1 Hypothetical protein (1)                    |                                                                                                                                                                                                                                                                                                                   | Aspartic peptidase domain [IPR021109] (1)                                                                                                                                                                                                                                                     | -                               | -                            | P_trifoliata_00955_mRNA_9,1     |
| GF0051146 | 0                            | 0                         | 0                            | 1 Hypothetical protein (1)                    |                                                                                                                                                                                                                                                                                                                   |                                                                                                                                                                                                                                                                                               | -                               | -                            | P_trifoliata_00955_mRNA_2,1     |
| GF0051145 | 0                            | 0                         | 0                            | 1 Lectin receptor kinase (1)                  |                                                                                                                                                                                                                                                                                                                   | Bulb-type lectin domain [IPR001480] (1)                                                                                                                                                                                                                                                       | -                               | -                            | P_trifoliata_00955_mRNA_12,1    |
| GF0051144 | 0                            | 0                         | 0                            | 1 Hypothetical protein (1)                    |                                                                                                                                                                                                                                                                                                                   |                                                                                                                                                                                                                                                                                               | -                               | -                            | P_trifoliata_00955_mRNA_11,1    |
| GF0051143 | 0                            | 0                         | 0                            | 1 Hypothetical protein (1)                    |                                                                                                                                                                                                                                                                                                                   |                                                                                                                                                                                                                                                                                               | -                               | -                            | P_trifoliata_00953_mRNA_3,1     |
| GF0051142 | 0                            | 0                         | 0                            | 1 Hypothetical protein (1)                    |                                                                                                                                                                                                                                                                                                                   |                                                                                                                                                                                                                                                                                               | -                               | -                            | P_trifoliata_00953_mRNA_2,1     |
| GF0051141 | 0                            | 0                         | 0                            | 1 Hypothetical protein (1)                    | protein phosphorylation [GO:0006468 biological_process] (1); protein kinase activity [GO:0004672 molecular_function] (1); ATP binding [GO:0005524 molecular_function] (1)                                                                                                                                         | Serine/threonine-protein kinase, active site [IPR008271] (1); Serine/threonine-dual specificity protein kinase, catalytic domain [IPR00290] (1); Leucine-rich repeat domain, L domain-like [IPR032675] (1); Protein kinase-like domain [IPR011009] (1); Protein kinase domain [IPR000719] (1) | -                               | -                            | P_trifoliata_00953_mRNA_1,1     |
| GF0051140 | 0                            | 0                         | 0                            | 1 Hypothetical protein (1)                    |                                                                                                                                                                                                                                                                                                                   |                                                                                                                                                                                                                                                                                               | -                               | -                            | P_trifoliata_00952_mRNA_2,1     |
| GF0051139 | 0                            | 0                         | 0                            | 1 Hypothetical protein (1)                    |                                                                                                                                                                                                                                                                                                                   |                                                                                                                                                                                                                                                                                               | -                               | -                            | P_trifoliata_00952_mRNA_1,1     |
| GF0051138 | 0                            | 0                         | 0                            | 1 Hypothetical protein (1)                    |                                                                                                                                                                                                                                                                                                                   | EAL domain [IPR001633] (1)                                                                                                                                                                                                                                                                    | -                               | -                            | P_trifoliata_00951_mRNA_4,1     |

| ID        | Num. in <i>C. caryocarpae</i> | Num. in <i>C. umbellata</i> | Num. in <i>P. trifoliata</i> | Note                                   | GO                                                                                                                                                                                                                                                                                                                 | InterPro                                                                                                                                                                                                                                                                            | Members in <i>C. caryocarpae</i> | Members in <i>C. umbellata</i> | Members in <i>P. trifoliata</i> |
|-----------|-------------------------------|-----------------------------|------------------------------|----------------------------------------|--------------------------------------------------------------------------------------------------------------------------------------------------------------------------------------------------------------------------------------------------------------------------------------------------------------------|-------------------------------------------------------------------------------------------------------------------------------------------------------------------------------------------------------------------------------------------------------------------------------------|----------------------------------|--------------------------------|---------------------------------|
| GF0051137 | 0                             | 0                           | 1                            | Probable protein phosphatase 2C 11 (1) | catalytic activity [GO:0003824 molecular_function] (1); protein dephosphorylation [GO:0006470 biological_process] (1); cation binding [GO:0043169 molecular_function] (1); protein serine/threonine phosphatase activity [GO:0004722 molecular_function] (1)                                                       | PPM-type phosphatase, divalent cation binding [IPR000222] (1); Protein phosphatase 2C family [IPR015655] (1); PPM-type phosphatase domain [IPR001932] (1)                                                                                                                           | -                                | -                              | P_trifoliata_00950_mRNA_6,1     |
| GF0051136 | 0                             | 0                           | 1                            | Hypothetical protein (1)               |                                                                                                                                                                                                                                                                                                                    |                                                                                                                                                                                                                                                                                     |                                  |                                | P_trifoliata_00949_mRNA_6,1     |
| GF0051135 | 0                             | 0                           | 1                            | Hypothetical protein (1)               |                                                                                                                                                                                                                                                                                                                    |                                                                                                                                                                                                                                                                                     |                                  |                                | P_trifoliata_00949_mRNA_5,1     |
| GF0051134 | 0                             | 0                           | 1                            | Hypothetical protein (1)               |                                                                                                                                                                                                                                                                                                                    |                                                                                                                                                                                                                                                                                     |                                  |                                | P_trifoliata_00948_mRNA_9,1     |
| GF0051133 | 0                             | 0                           | 1                            | Hypothetical protein (1)               | viral process [GO:0016032 biological_process] (1)                                                                                                                                                                                                                                                                  | Retrotropovirus gag domain [IPR005162] (1); Retroviral nucleocapsid protein Gag [IPR000721] (1); Retrovirus capsid, C-terminal [IPR008916] (1)                                                                                                                                      |                                  |                                | P_trifoliata_00948_mRNA_8,1     |
| GF0051132 | 0                             | 0                           | 1                            | Hypothetical protein (1)               | zinc ion binding [GO:0008270 molecular_function] (1)                                                                                                                                                                                                                                                               | Zinc finger, ZPR1-type [IPR004457] (1)                                                                                                                                                                                                                                              |                                  |                                | P_trifoliata_00948_mRNA_2,1     |
| GF0051131 | 0                             | 0                           | 1                            | Hypothetical protein (1)               |                                                                                                                                                                                                                                                                                                                    |                                                                                                                                                                                                                                                                                     |                                  |                                | P_trifoliata_00948_mRNA_1,1     |
| GF0051130 | 0                             | 0                           | 1                            | Hypothetical protein (1)               |                                                                                                                                                                                                                                                                                                                    |                                                                                                                                                                                                                                                                                     |                                  |                                | P_trifoliata_00947_mRNA_7,1     |
| GF0051129 | 0                             | 0                           | 1                            | Hypothetical protein (1)               |                                                                                                                                                                                                                                                                                                                    |                                                                                                                                                                                                                                                                                     |                                  |                                | P_trifoliata_00947_mRNA_4,1     |
| GF0051128 | 0                             | 0                           | 1                            | Hypothetical protein (1)               |                                                                                                                                                                                                                                                                                                                    |                                                                                                                                                                                                                                                                                     |                                  |                                | P_trifoliata_00947_mRNA_3,1     |
| GF0051127 | 0                             | 0                           | 1                            | Hypothetical protein (1)               |                                                                                                                                                                                                                                                                                                                    |                                                                                                                                                                                                                                                                                     |                                  |                                | P_trifoliata_00947_mRNA_1,1     |
| GF0051126 | 0                             | 0                           | 1                            | Hypothetical protein (1)               |                                                                                                                                                                                                                                                                                                                    |                                                                                                                                                                                                                                                                                     |                                  |                                | P_trifoliata_00946_mRNA_2,1     |
| GF0051125 | 0                             | 0                           | 1                            | Hypothetical protein (1)               |                                                                                                                                                                                                                                                                                                                    |                                                                                                                                                                                                                                                                                     |                                  |                                | P_trifoliata_00946_mRNA_1,1     |
| GF0051124 | 0                             | 0                           | 1                            | Hypothetical protein (1)               |                                                                                                                                                                                                                                                                                                                    |                                                                                                                                                                                                                                                                                     |                                  |                                | P_trifoliata_00945_mRNA_6,1     |
| GF0051123 | 0                             | 0                           | 1                            | Hypothetical protein (1)               |                                                                                                                                                                                                                                                                                                                    |                                                                                                                                                                                                                                                                                     |                                  |                                | P_trifoliata_00945_mRNA_4,1     |
| GF0051122 | 0                             | 0                           | 1                            | Hypothetical protein (1)               | nucleic acid binding [GO:0003676 molecular_function] (1); zinc ion binding [GO:0008270 molecular_function] (1)                                                                                                                                                                                                     | Zinc finger, CCHC-type [IPR001878] (1)                                                                                                                                                                                                                                              |                                  |                                | P_trifoliata_00945_mRNA_2,1     |
| GF0051121 | 0                             | 0                           | 1                            | Hypothetical protein (1)               |                                                                                                                                                                                                                                                                                                                    |                                                                                                                                                                                                                                                                                     |                                  |                                | P_trifoliata_00945_mRNA_12,1    |
| GF0051120 | 0                             | 0                           | 1                            | Hypothetical protein (1)               |                                                                                                                                                                                                                                                                                                                    |                                                                                                                                                                                                                                                                                     |                                  |                                | P_trifoliata_00945_mRNA_11,1    |
| GF0051119 | 0                             | 0                           | 1                            | Hypothetical protein (1)               | zinc ion binding [GO:0008270 molecular_function] (1); nucleic acid binding [GO:0003676 molecular_function] (1)                                                                                                                                                                                                     | Zinc finger, CCHC-type [IPR001878] (1)                                                                                                                                                                                                                                              |                                  |                                | P_trifoliata_00945_mRNA_10,1    |
| GF0051118 | 0                             | 0                           | 1                            | Hypothetical protein (1)               |                                                                                                                                                                                                                                                                                                                    |                                                                                                                                                                                                                                                                                     |                                  |                                | P_trifoliata_00945_mRNA_1,1     |
| GF0051117 | 0                             | 0                           | 1                            | Hypothetical protein (1)               |                                                                                                                                                                                                                                                                                                                    |                                                                                                                                                                                                                                                                                     |                                  |                                | P_trifoliata_00944_mRNA_5,1     |
| GF0051116 | 0                             | 0                           | 1                            | Hypothetical protein (1)               |                                                                                                                                                                                                                                                                                                                    |                                                                                                                                                                                                                                                                                     |                                  |                                | P_trifoliata_00944_mRNA_4,1     |
| GF0051115 | 0                             | 0                           | 1                            | Hypothetical protein (1)               |                                                                                                                                                                                                                                                                                                                    |                                                                                                                                                                                                                                                                                     |                                  |                                | P_trifoliata_00944_mRNA_2,1     |
| GF0051114 | 0                             | 0                           | 1                            | Hypothetical protein (1)               |                                                                                                                                                                                                                                                                                                                    |                                                                                                                                                                                                                                                                                     |                                  |                                | P_trifoliata_00942_mRNA_9,1     |
| GF0051113 | 0                             | 0                           | 1                            | Hypothetical protein (1)               |                                                                                                                                                                                                                                                                                                                    | Protein of unknown function DUF2921 [IPR021319] (1)                                                                                                                                                                                                                                 |                                  |                                | P_trifoliata_00942_mRNA_5,1     |
| GF0051112 | 0                             | 0                           | 1                            | Hypothetical protein (1)               | oxidoreductase activity, acting on paired donors, with incorporation or reduction of molecular oxygen [GO:0016705 molecular_function] (1); oxidation-reduction process [GO:0055114 biological_process] (1); iron ion binding [GO:0005506 molecular_function] (1); heme binding [GO:0020037 molecular_function] (1) | Cytochrome P450, E-class, group I [IPR002401] (1); Cytochrome P450 [IPR001128] (1)                                                                                                                                                                                                  |                                  |                                | P_trifoliata_00942_mRNA_3,1     |
| GF0051111 | 0                             | 0                           | 1                            | Flavonoid 3',5'-hydroxylase (1)        | oxidoreductase activity, acting on paired donors, with incorporation or reduction of molecular oxygen [GO:0016705 molecular_function] (1); oxidation-reduction process [GO:0055114 biological_process] (1); heme binding [GO:0020037 molecular_function] (1); iron ion binding [GO:0005506 molecular_function] (1) | Cytochrome P450, E-class, group I [IPR002401] (1); Cytochrome P450, conserved site [IPR017972] (1); Cytochrome P450 [IPR001128] (1)                                                                                                                                                 |                                  |                                | P_trifoliata_00942_mRNA_2,1     |
| GF0051110 | 0                             | 0                           | 1                            | Hypothetical protein (1)               |                                                                                                                                                                                                                                                                                                                    |                                                                                                                                                                                                                                                                                     |                                  |                                | P_trifoliata_00940_mRNA_6,1     |
| GF0051109 | 0                             | 0                           | 1                            | Hypothetical protein (1)               |                                                                                                                                                                                                                                                                                                                    |                                                                                                                                                                                                                                                                                     |                                  |                                | P_trifoliata_00940_mRNA_5,1     |
| GF0051108 | 0                             | 0                           | 1                            | Hypothetical protein (1)               |                                                                                                                                                                                                                                                                                                                    |                                                                                                                                                                                                                                                                                     |                                  |                                | P_trifoliata_00940_mRNA_4,1     |
| GF0051107 | 0                             | 0                           | 1                            | Hypothetical protein (1)               |                                                                                                                                                                                                                                                                                                                    |                                                                                                                                                                                                                                                                                     |                                  |                                | P_trifoliata_00940_mRNA_2,1     |
| GF0051106 | 0                             | 0                           | 1                            | Hypothetical protein (1)               |                                                                                                                                                                                                                                                                                                                    |                                                                                                                                                                                                                                                                                     |                                  |                                | P_trifoliata_00940_mRNA_1,1     |
| GF0051105 | 0                             | 0                           | 1                            | Hypothetical protein (1)               |                                                                                                                                                                                                                                                                                                                    | Zinc knuckle CXC/CXHC/CXAC [IPR025836] (1)                                                                                                                                                                                                                                          |                                  |                                | P_trifoliata_00939_mRNA_8,1     |
| GF0051104 | 0                             | 0                           | 1                            | Hypothetical protein (1)               |                                                                                                                                                                                                                                                                                                                    |                                                                                                                                                                                                                                                                                     |                                  |                                | P_trifoliata_00939_mRNA_5,1     |
| GF0051103 | 0                             | 0                           | 1                            | Hypothetical protein (1)               |                                                                                                                                                                                                                                                                                                                    |                                                                                                                                                                                                                                                                                     |                                  |                                | P_trifoliata_00939_mRNA_16,1    |
| GF0051102 | 0                             | 0                           | 1                            | Hypothetical protein (1)               |                                                                                                                                                                                                                                                                                                                    |                                                                                                                                                                                                                                                                                     |                                  |                                | P_trifoliata_00939_mRNA_15,1    |
| GF0051101 | 0                             | 0                           | 1                            | Hypothetical protein (1)               |                                                                                                                                                                                                                                                                                                                    |                                                                                                                                                                                                                                                                                     |                                  |                                | P_trifoliata_00939_mRNA_14,1    |
| GF0051100 | 0                             | 0                           | 1                            | Ribonuclease H (1)                     | nucleic acid binding [GO:0003676 molecular_function] (1)                                                                                                                                                                                                                                                           | Ribonuclease H-like domain [IPR012377] (1)                                                                                                                                                                                                                                          |                                  |                                | P_trifoliata_00939_mRNA_13,1    |
| GF0051099 | 0                             | 0                           | 1                            | Hypothetical protein (1)               |                                                                                                                                                                                                                                                                                                                    | Zinc knuckle CXC/CXHC/CXAC [IPR025836] (1); Domain of unknown function DUF4283 [IPR025558] (1)                                                                                                                                                                                      |                                  |                                | P_trifoliata_00939_mRNA_11,1    |
| GF0051098 | 0                             | 0                           | 1                            | Hypothetical protein (1)               |                                                                                                                                                                                                                                                                                                                    |                                                                                                                                                                                                                                                                                     |                                  |                                | P_trifoliata_00939_mRNA_10,1    |
| GF0051097 | 0                             | 0                           | 1                            | Hypothetical protein (1)               |                                                                                                                                                                                                                                                                                                                    |                                                                                                                                                                                                                                                                                     |                                  |                                | P_trifoliata_00939_mRNA_1,1     |
| GF0051096 | 0                             | 0                           | 1                            | Hypothetical protein (1)               |                                                                                                                                                                                                                                                                                                                    |                                                                                                                                                                                                                                                                                     |                                  |                                | P_trifoliata_00938_mRNA_1,1     |
| GF0051095 | 0                             | 0                           | 1                            | Hypothetical protein (1)               |                                                                                                                                                                                                                                                                                                                    |                                                                                                                                                                                                                                                                                     |                                  |                                | P_trifoliata_00936_mRNA_1,1     |
| GF0051094 | 0                             | 0                           | 1                            | Hypothetical protein (1)               |                                                                                                                                                                                                                                                                                                                    |                                                                                                                                                                                                                                                                                     |                                  |                                | P_trifoliata_00934_mRNA_5,1     |
| GF0051093 | 0                             | 0                           | 1                            | Hypothetical protein (1)               |                                                                                                                                                                                                                                                                                                                    |                                                                                                                                                                                                                                                                                     |                                  |                                | P_trifoliata_00934_mRNA_3,1     |
| GF0051092 | 0                             | 0                           | 1                            | Hypothetical protein (1)               | oxidation-reduction process [GO:0055114 biological_process] (1); oxidoreductase activity, acting on paired donors, with incorporation or reduction of molecular oxygen [GO:0016705 molecular_function] (1); heme binding [GO:0020037 molecular_function] (1); iron ion binding [GO:0005506 molecular_function] (1) | Cytochrome P450 [IPR001128] (1); Aspartic peptidase domain [IPR021109] (1)                                                                                                                                                                                                          |                                  |                                | P_trifoliata_00933_mRNA_5,1     |
| GF0051091 | 0                             | 0                           | 1                            | Hypothetical protein (1)               | proteolysis [GO:0006508 biological_process] (1); cysteine-type peptidase activity [GO:0008234 molecular_function] (1)                                                                                                                                                                                              | Peptidase C1A [IPR013128] (1); Cysteine peptidase, cysteine active site [IPR000169] (1); Peptidase C1A, papain C-terminal [IPR000688] (1); Cathepsin propeptide inhibitor domain (I29) [IPR013201] (1)                                                                              |                                  |                                | P_trifoliata_00933_mRNA_1,1     |
| GF0051090 | 0                             | 0                           | 1                            | Hypothetical protein (1)               |                                                                                                                                                                                                                                                                                                                    |                                                                                                                                                                                                                                                                                     |                                  |                                | P_trifoliata_00932_mRNA_8,1     |
| GF0051089 | 0                             | 0                           | 1                            | Hypothetical protein (1)               |                                                                                                                                                                                                                                                                                                                    |                                                                                                                                                                                                                                                                                     |                                  |                                | P_trifoliata_00932_mRNA_7,1     |
| GF0051088 | 0                             | 0                           | 1                            | Hypothetical protein (1)               |                                                                                                                                                                                                                                                                                                                    |                                                                                                                                                                                                                                                                                     |                                  |                                | P_trifoliata_00932_mRNA_5,1     |
| GF0051087 | 0                             | 0                           | 1                            | Hypothetical protein (1)               |                                                                                                                                                                                                                                                                                                                    |                                                                                                                                                                                                                                                                                     |                                  |                                | P_trifoliata_00931_mRNA_5,1     |
| GF0051086 | 0                             | 0                           | 1                            | O-methyltransferase ZRP4 (1)           | protein dimerization activity [GO:0046083 molecular_function] (1); O-methyltransferase activity [GO:0008171 molecular_function] (1); methyltransferase activity [GO:0008168 molecular_function] (1)                                                                                                                | S-adenosyl-L-methionine-dependent methyltransferase [IPR029063] (1); O-methyltransferase, family 2 [IPR010177] (1); Winged helix-turn-helix DNA-binding domain [IPR011991] (1); Plant methyltransferase dimerization [IPR012967] (1); O-methyltransferase COMT-type [IPR016461] (1) |                                  |                                | P_trifoliata_00931_mRNA_4,1     |
| GF0051085 | 0                             | 0                           | 1                            | Hypothetical protein (1)               |                                                                                                                                                                                                                                                                                                                    | Domain of unknown function DUF4371 [IPR025398] (1)                                                                                                                                                                                                                                  |                                  |                                | P_trifoliata_00931_mRNA_2,1     |
| GF0051084 | 0                             | 0                           | 1                            | Hypothetical protein (1)               |                                                                                                                                                                                                                                                                                                                    |                                                                                                                                                                                                                                                                                     |                                  |                                | P_trifoliata_00931_mRNA_1,1     |
| GF0051083 | 0                             | 0                           | 1                            | Hypothetical protein (1)               |                                                                                                                                                                                                                                                                                                                    |                                                                                                                                                                                                                                                                                     |                                  |                                | P_trifoliata_00930_mRNA_6,1     |
| GF0051082 | 0                             | 0                           | 1                            | Hypothetical protein (1)               |                                                                                                                                                                                                                                                                                                                    |                                                                                                                                                                                                                                                                                     |                                  |                                | P_trifoliata_00930_mRNA_5,1     |
| GF0051081 | 0                             | 0                           | 1                            | Hypothetical protein (1)               |                                                                                                                                                                                                                                                                                                                    | Concanavalin A-like lectin/glucanase domain [IPR013202] (1)                                                                                                                                                                                                                         |                                  |                                | P_trifoliata_00930_mRNA_3,1     |
| GF0051080 | 0                             | 0                           | 1                            | Hypothetical protein (1)               |                                                                                                                                                                                                                                                                                                                    |                                                                                                                                                                                                                                                                                     |                                  |                                | P_trifoliata_00930_mRNA_1,1     |
| GF0051079 | 0                             | 0                           | 1                            | Hypothetical protein (1)               | zinc ion binding [GO:0008270 molecular_function] (1); nucleic acid binding [GO:0003676 molecular_function] (1)                                                                                                                                                                                                     | Zinc finger, CCHC-type [IPR001878] (1)                                                                                                                                                                                                                                              |                                  |                                | P_trifoliata_00928_mRNA_6,1     |
| GF0051078 | 0                             | 0                           | 1                            | Hypothetical protein (1)               |                                                                                                                                                                                                                                                                                                                    |                                                                                                                                                                                                                                                                                     |                                  |                                | P_trifoliata_00928_mRNA_5,1     |
| GF0051077 | 0                             | 0                           | 1                            | Hypothetical protein (1)               |                                                                                                                                                                                                                                                                                                                    |                                                                                                                                                                                                                                                                                     |                                  |                                | P_trifoliata_00928_mRNA_4,1     |
| GF0051076 | 0                             | 0                           | 1                            | Hypothetical protein (1)               |                                                                                                                                                                                                                                                                                                                    |                                                                                                                                                                                                                                                                                     |                                  |                                | P_trifoliata_00928_mRNA_3,1     |
| GF0051075 | 0                             | 0                           | 1                            | Hypothetical protein (1)               |                                                                                                                                                                                                                                                                                                                    |                                                                                                                                                                                                                                                                                     |                                  |                                | P_trifoliata_00928_mRNA_2,1     |
| GF0051074 | 0                             | 0                           | 1                            | Hypothetical protein (1)               |                                                                                                                                                                                                                                                                                                                    |                                                                                                                                                                                                                                                                                     |                                  |                                | P_trifoliata_00927_mRNA_3,1     |
| GF0051073 | 0                             | 0                           | 1                            | Hypothetical protein (1)               |                                                                                                                                                                                                                                                                                                                    |                                                                                                                                                                                                                                                                                     |                                  |                                | P_trifoliata_00927_mRNA_2,1     |
| GF0051072 | 0                             | 0                           | 1                            | Hypothetical protein (1)               |                                                                                                                                                                                                                                                                                                                    |                                                                                                                                                                                                                                                                                     |                                  |                                | P_trifoliata_00927_mRNA_1,1     |
| GF0051071 | 0                             | 0                           | 1                            | Hypothetical protein (1)               |                                                                                                                                                                                                                                                                                                                    |                                                                                                                                                                                                                                                                                     |                                  |                                | P_trifoliata_00926_mRNA_5,1     |
| GF0051070 | 0                             | 0                           | 1                            | Hypothetical protein (1)               |                                                                                                                                                                                                                                                                                                                    |                                                                                                                                                                                                                                                                                     |                                  |                                | P_trifoliata_00926_mRNA_3,1     |
| GF0051069 | 0                             | 0                           | 1                            | Hypothetical protein (1)               |                                                                                                                                                                                                                                                                                                                    |                                                                                                                                                                                                                                                                                     |                                  |                                | P_trifoliata_00926_mRNA_2,1     |
| GF0051068 | 0                             | 0                           | 1                            | Hypothetical protein (1)               | microtubule [GO:0005574 cellular_component] (1); spindle [GO:0005819 cellular_component] (1); regulation of mitotic spindle organization [GO:0060236 biological_process] (1); activation of protein kinase activity [GO:0032147 biological_process] (1)                                                            | TPX2 central domain [IPR027330] (1); TPX2 [IPR009675] (1)                                                                                                                                                                                                                           |                                  |                                | P_trifoliata_00926_mRNA_1,1     |
| GF0051067 | 0                             | 0                           | 1                            | Hypothetical protein (1)               |                                                                                                                                                                                                                                                                                                                    |                                                                                                                                                                                                                                                                                     |                                  |                                | P_trifoliata_00925_mRNA_4,1     |
| GF0051066 | 0                             | 0                           | 1                            | Hypothetical protein (1)               |                                                                                                                                                                                                                                                                                                                    |                                                                                                                                                                                                                                                                                     |                                  |                                | P_trifoliata_00925_mRNA_3,1     |
| GF0051065 | 0                             | 0                           | 1                            | Hypothetical protein (1)               |                                                                                                                                                                                                                                                                                                                    |                                                                                                                                                                                                                                                                                     |                                  |                                | P_trifoliata_00924_mRNA_4,1     |
| GF0051064 | 0                             | 0                           | 1                            | Hypothetical protein (1)               |                                                                                                                                                                                                                                                                                                                    |                                                                                                                                                                                                                                                                                     |                                  |                                | P_trifoliata_00924_mRNA_1,1     |



| ID        | Num. in <i>C. clementiae</i> | Num. in <i>C. canthii</i> | Num. in <i>P. trifoliata</i> | Note                                                            | GO                                     | InterPro                                                                                                                                                                                                                                                                                                                               | Members in <i>C. clementiae</i>                                                                                                                                                                                                                                                                                                                                       | Members in <i>C. canthii</i> | Members in <i>P. trifoliata</i> |
|-----------|------------------------------|---------------------------|------------------------------|-----------------------------------------------------------------|----------------------------------------|----------------------------------------------------------------------------------------------------------------------------------------------------------------------------------------------------------------------------------------------------------------------------------------------------------------------------------------|-----------------------------------------------------------------------------------------------------------------------------------------------------------------------------------------------------------------------------------------------------------------------------------------------------------------------------------------------------------------------|------------------------------|---------------------------------|
| GF0051063 | 0                            | 0                         | 1                            | Hypothetical protein (1)                                        |                                        |                                                                                                                                                                                                                                                                                                                                        |                                                                                                                                                                                                                                                                                                                                                                       |                              | P_trifoliata_00923_mRNA_2,1     |
| GF0051062 | 0                            | 0                         | 1                            | Hypothetical protein (1)                                        |                                        |                                                                                                                                                                                                                                                                                                                                        |                                                                                                                                                                                                                                                                                                                                                                       |                              | P_trifoliata_00922_mRNA_4,1     |
| GF0051061 | 0                            | 0                         | 1                            | Hypothetical protein (1)                                        |                                        |                                                                                                                                                                                                                                                                                                                                        |                                                                                                                                                                                                                                                                                                                                                                       |                              | P_trifoliata_00922_mRNA_3,1     |
| GF0051060 | 0                            | 0                         | 1                            | Hypothetical protein (1)                                        | protein binding [GO:0005515]           | WD40/YFYF repeat-like-containing domain [IPRO15943] (1); WD40-repeat-containing domain [IPRO17986] (1); WD40 repeat [IPRO01680] (1)                                                                                                                                                                                                    |                                                                                                                                                                                                                                                                                                                                                                       |                              | P_trifoliata_00922_mRNA_1,1     |
| GF0051059 | 0                            | 0                         | 1                            | Hypothetical protein (1)                                        |                                        |                                                                                                                                                                                                                                                                                                                                        |                                                                                                                                                                                                                                                                                                                                                                       |                              | P_trifoliata_00921_mRNA_2,1     |
| GF0051058 | 0                            | 0                         | 1                            | Hypothetical protein (1)                                        |                                        |                                                                                                                                                                                                                                                                                                                                        |                                                                                                                                                                                                                                                                                                                                                                       |                              | P_trifoliata_00920_mRNA_1,1     |
| GF0051057 | 0                            | 0                         | 1                            | Hypothetical protein (1)                                        |                                        |                                                                                                                                                                                                                                                                                                                                        |                                                                                                                                                                                                                                                                                                                                                                       |                              | P_trifoliata_00919_mRNA_1,1     |
| GF0051056 | 0                            | 0                         | 1                            | Hypothetical protein (1)                                        |                                        |                                                                                                                                                                                                                                                                                                                                        |                                                                                                                                                                                                                                                                                                                                                                       |                              | P_trifoliata_00918_mRNA_4,1     |
| GF0051055 | 0                            | 0                         | 1                            | Hypothetical protein (1)                                        |                                        |                                                                                                                                                                                                                                                                                                                                        |                                                                                                                                                                                                                                                                                                                                                                       |                              | P_trifoliata_00917_mRNA_4,1     |
| GF0051054 | 0                            | 0                         | 1                            | Hypothetical protein (1)                                        |                                        |                                                                                                                                                                                                                                                                                                                                        |                                                                                                                                                                                                                                                                                                                                                                       |                              | P_trifoliata_00916_mRNA_6,1     |
| GF0051053 | 0                            | 0                         | 1                            | Hypothetical protein (1)                                        |                                        |                                                                                                                                                                                                                                                                                                                                        |                                                                                                                                                                                                                                                                                                                                                                       |                              | P_trifoliata_00916_mRNA_5,1     |
| GF0051052 | 0                            | 0                         | 1                            | Hypothetical protein (1)                                        |                                        |                                                                                                                                                                                                                                                                                                                                        |                                                                                                                                                                                                                                                                                                                                                                       |                              | P_trifoliata_00916_mRNA_2,1     |
| GF0051051 | 0                            | 0                         | 1                            | Hypothetical protein (1)                                        |                                        |                                                                                                                                                                                                                                                                                                                                        |                                                                                                                                                                                                                                                                                                                                                                       |                              | P_trifoliata_00916_mRNA_1,1     |
| GF0051050 | 0                            | 0                         | 1                            | Hypothetical protein (1)                                        |                                        |                                                                                                                                                                                                                                                                                                                                        |                                                                                                                                                                                                                                                                                                                                                                       |                              | P_trifoliata_00915_mRNA_7,1     |
| GF0051049 | 0                            | 0                         | 1                            | Hypothetical protein (1)                                        |                                        |                                                                                                                                                                                                                                                                                                                                        |                                                                                                                                                                                                                                                                                                                                                                       |                              | P_trifoliata_00915_mRNA_6,1     |
| GF0051048 | 0                            | 0                         | 1                            | Verticillium wilt resistance-like protein (1)                   | protein binding [GO:0005515]           | Leucine-rich repeat, typical subtype [IPRO0591] (1); Leucine-rich repeat domain, L domain-like [IPRO32675] (1); Leucine-rich repeat [IPRO01611] (1); Leucine-rich repeat-containing N-terminal, plant-type [IPRO13210] (1)                                                                                                             |                                                                                                                                                                                                                                                                                                                                                                       |                              | P_trifoliata_00915_mRNA_3,1     |
| GF0051047 | 0                            | 0                         | 1                            | Hypothetical protein (1)                                        |                                        | PAN/Apple domain [IPRO03609] (1)                                                                                                                                                                                                                                                                                                       |                                                                                                                                                                                                                                                                                                                                                                       |                              | P_trifoliata_00914_mRNA_1,1     |
| GF0051046 | 0                            | 0                         | 1                            | Hypothetical protein (1)                                        |                                        |                                                                                                                                                                                                                                                                                                                                        |                                                                                                                                                                                                                                                                                                                                                                       |                              | P_trifoliata_00913_mRNA_8,1     |
| GF0051045 | 0                            | 0                         | 1                            | Hypothetical protein (1)                                        |                                        |                                                                                                                                                                                                                                                                                                                                        |                                                                                                                                                                                                                                                                                                                                                                       |                              | P_trifoliata_00913_mRNA_7,1     |
| GF0051044 | 0                            | 0                         | 1                            | Hypothetical protein (1)                                        |                                        |                                                                                                                                                                                                                                                                                                                                        |                                                                                                                                                                                                                                                                                                                                                                       |                              | P_trifoliata_00913_mRNA_5,1     |
| GF0051043 | 0                            | 0                         | 1                            | Hypothetical protein (1)                                        |                                        |                                                                                                                                                                                                                                                                                                                                        |                                                                                                                                                                                                                                                                                                                                                                       |                              | P_trifoliata_00913_mRNA_4,1     |
| GF0051042 | 0                            | 0                         | 1                            | Hypothetical protein (1)                                        |                                        |                                                                                                                                                                                                                                                                                                                                        |                                                                                                                                                                                                                                                                                                                                                                       |                              | P_trifoliata_00913_mRNA_3,1     |
| GF0051041 | 0                            | 0                         | 1                            | Hypothetical protein (1)                                        |                                        |                                                                                                                                                                                                                                                                                                                                        |                                                                                                                                                                                                                                                                                                                                                                       |                              | P_trifoliata_00913_mRNA_13,1    |
| GF0051040 | 0                            | 0                         | 1                            | Hypothetical protein (1)                                        |                                        |                                                                                                                                                                                                                                                                                                                                        |                                                                                                                                                                                                                                                                                                                                                                       |                              | P_trifoliata_00913_mRNA_1,1     |
| GF0051039 | 0                            | 0                         | 1                            | Hypothetical protein (1)                                        |                                        |                                                                                                                                                                                                                                                                                                                                        |                                                                                                                                                                                                                                                                                                                                                                       |                              | P_trifoliata_00912_mRNA_1,1     |
| GF0051038 | 0                            | 0                         | 1                            | Hypothetical protein (1)                                        |                                        |                                                                                                                                                                                                                                                                                                                                        |                                                                                                                                                                                                                                                                                                                                                                       |                              | P_trifoliata_00911_mRNA_2,1     |
| GF0051037 | 0                            | 0                         | 1                            | Hypothetical protein (1)                                        |                                        |                                                                                                                                                                                                                                                                                                                                        |                                                                                                                                                                                                                                                                                                                                                                       |                              | P_trifoliata_00910_mRNA_2,1     |
| GF0051036 | 0                            | 0                         | 1                            | Hypothetical protein (1)                                        | nucleic acid binding [GO:0003676]      | molecular_function (1); zinc ion binding Zinc finger, CCHC-type [IPRO01878] (1) - [GO:0008270 molecular_function] (1)                                                                                                                                                                                                                  |                                                                                                                                                                                                                                                                                                                                                                       |                              | P_trifoliata_00909_mRNA_8,1     |
| GF0051035 | 0                            | 0                         | 1                            | Hypothetical protein (1)                                        |                                        |                                                                                                                                                                                                                                                                                                                                        |                                                                                                                                                                                                                                                                                                                                                                       |                              | P_trifoliata_00909_mRNA_5,1     |
| GF0051034 | 0                            | 0                         | 1                            | Hypothetical protein (1)                                        |                                        |                                                                                                                                                                                                                                                                                                                                        |                                                                                                                                                                                                                                                                                                                                                                       |                              | P_trifoliata_00908_mRNA_9,1     |
| GF0051033 | 0                            | 0                         | 1                            | Hypothetical protein (1)                                        |                                        |                                                                                                                                                                                                                                                                                                                                        |                                                                                                                                                                                                                                                                                                                                                                       |                              | P_trifoliata_00908_mRNA_7,1     |
| GF0051032 | 0                            | 0                         | 1                            | Hypothetical protein (1)                                        |                                        |                                                                                                                                                                                                                                                                                                                                        |                                                                                                                                                                                                                                                                                                                                                                       |                              | P_trifoliata_00908_mRNA_6,1     |
| GF0051031 | 0                            | 0                         | 1                            | Hypothetical protein (1)                                        |                                        |                                                                                                                                                                                                                                                                                                                                        |                                                                                                                                                                                                                                                                                                                                                                       |                              | P_trifoliata_00908_mRNA_3,1     |
| GF0051030 | 0                            | 0                         | 1                            | Hypothetical protein (1)                                        |                                        |                                                                                                                                                                                                                                                                                                                                        |                                                                                                                                                                                                                                                                                                                                                                       |                              | P_trifoliata_00908_mRNA_2,1     |
| GF0051029 | 0                            | 0                         | 1                            | TMV resistance protein N, putative (1)                          | ADP binding [GO:0043531]               | molecular_function (1)                                                                                                                                                                                                                                                                                                                 | P-loop containing nucleoside triphosphate hydrolase [IPRO27417] (1); NB-ARC [IPRO02182] (1); Winged helix-turn-helix DNA-binding domain [IPRO11991] (1)                                                                                                                                                                                                               |                              | P_trifoliata_00908_mRNA_1,1     |
| GF0051028 | 0                            | 0                         | 1                            | Hypothetical protein (1)                                        | calcium ion binding [GO:0005509]       | molecular_function (1)                                                                                                                                                                                                                                                                                                                 | EF-Hand 1, calcium-binding site [IPRO18247] (1); EF-hand domain [IPRO02048] (1); EF-hand domain pair [IPRO11992] (1)                                                                                                                                                                                                                                                  |                              | P_trifoliata_00907_mRNA_3,1     |
| GF0051027 | 0                            | 0                         | 1                            | NBS-LRR type disease resistance protein (1)                     | ADP binding [GO:0043531]               | molecular_function (1)                                                                                                                                                                                                                                                                                                                 | P-loop containing nucleoside triphosphate hydrolase [IPRO27417] (1); NB-ARC [IPRO02182] (1)                                                                                                                                                                                                                                                                           |                              | P_trifoliata_00906_mRNA_3,1     |
| GF0051026 | 0                            | 0                         | 1                            | Hypothetical protein (1)                                        |                                        |                                                                                                                                                                                                                                                                                                                                        |                                                                                                                                                                                                                                                                                                                                                                       |                              | P_trifoliata_00905_mRNA_7,1     |
| GF0051025 | 0                            | 0                         | 1                            | Hypothetical protein (1)                                        |                                        |                                                                                                                                                                                                                                                                                                                                        |                                                                                                                                                                                                                                                                                                                                                                       |                              | P_trifoliata_00905_mRNA_6,1     |
| GF0051024 | 0                            | 0                         | 1                            | Hypothetical protein (1)                                        |                                        |                                                                                                                                                                                                                                                                                                                                        |                                                                                                                                                                                                                                                                                                                                                                       |                              | P_trifoliata_00905_mRNA_2,1     |
| GF0051023 | 0                            | 0                         | 1                            | Hypothetical protein (1)                                        |                                        |                                                                                                                                                                                                                                                                                                                                        |                                                                                                                                                                                                                                                                                                                                                                       |                              | P_trifoliata_00904_mRNA_9,1     |
| GF0051022 | 0                            | 0                         | 1                            | Hypothetical protein (1)                                        |                                        |                                                                                                                                                                                                                                                                                                                                        |                                                                                                                                                                                                                                                                                                                                                                       |                              | P_trifoliata_00904_mRNA_12,1    |
| GF0051021 | 0                            | 0                         | 1                            | Hypothetical protein (1)                                        | protein kinase activity [GO:0004672]   | molecular_function (1); protein phosphorylation [GO:0006468]                                                                                                                                                                                                                                                                           | Serine/threonine-protein kinase, active site [IPRO08271] (1); Serine/threonine/dual specificity protein kinase, catalytic domain [IPRO02290] (1); Protein kinase domain [IPRO00719] (1); Leucine-rich repeat domain, L domain-like [IPRO32675] (1); Protein kinase-like domain [IPRO11009] (1)                                                                        |                              | P_trifoliata_00903_mRNA_7,1     |
| GF0051020 | 0                            | 0                         | 1                            | Hypothetical protein (1)                                        |                                        |                                                                                                                                                                                                                                                                                                                                        |                                                                                                                                                                                                                                                                                                                                                                       |                              | P_trifoliata_00903_mRNA_6,1     |
| GF0051019 | 0                            | 0                         | 1                            | Hypothetical protein (1)                                        |                                        |                                                                                                                                                                                                                                                                                                                                        |                                                                                                                                                                                                                                                                                                                                                                       |                              | P_trifoliata_00903_mRNA_4,1     |
| GF0051018 | 0                            | 0                         | 1                            | Hypothetical protein (1)                                        |                                        |                                                                                                                                                                                                                                                                                                                                        |                                                                                                                                                                                                                                                                                                                                                                       |                              | P_trifoliata_00903_mRNA_3,1     |
| GF0051017 | 0                            | 0                         | 1                            | Hypothetical protein (1)                                        | DNA binding [GO:0003677]               | molecular_function (1)                                                                                                                                                                                                                                                                                                                 | B3 DNA-binding domain [IPRO03340] (1); DNA-binding pseudobarrel domain [IPRO15300] (1)                                                                                                                                                                                                                                                                                |                              | P_trifoliata_00903_mRNA_2,1     |
| GF0051016 | 0                            | 0                         | 1                            | Hypothetical protein (1)                                        | ATP binding [GO:0005524]               | molecular_function (1); protein kinase activity [GO:0004672]                                                                                                                                                                                                                                                                           | Leucine-rich repeat-containing N-terminal, plant-type [IPRO13210] (1); Serine/threonine-protein kinase, active site [IPRO08271] (1); Serine/threonine/dual specificity protein kinase, catalytic domain [IPRO02290] (1); Protein kinase domain [IPRO00719] (1); Protein kinase-like domain [IPRO11009] (1); Leucine-rich repeat domain, L domain-like [IPRO32675] (1) |                              | P_trifoliata_00903_mRNA_10,1    |
| GF0051015 | 0                            | 0                         | 1                            | Leucine-rich repeat protein kinase family protein, putative (1) | ATP binding [GO:0005524]               | molecular_function (1); protein kinase activity [GO:0004672]                                                                                                                                                                                                                                                                           | Protein kinase-like domain [IPRO11009] (1); Protein kinase domain [IPRO00719] (1); Serine/threonine-protein kinase, active site [IPRO08271] (1); Serine/threonine/dual specificity protein kinase, catalytic domain [IPRO02290] (1)                                                                                                                                   |                              | P_trifoliata_00903_mRNA_1,1     |
| GF0051014 | 0                            | 0                         | 1                            | Hypothetical protein (1)                                        |                                        |                                                                                                                                                                                                                                                                                                                                        |                                                                                                                                                                                                                                                                                                                                                                       |                              | P_trifoliata_00901_mRNA_6,1     |
| GF0051013 | 0                            | 0                         | 1                            | Hypothetical protein (1)                                        |                                        |                                                                                                                                                                                                                                                                                                                                        |                                                                                                                                                                                                                                                                                                                                                                       |                              | P_trifoliata_00901_mRNA_4,1     |
| GF0051012 | 0                            | 0                         | 1                            | Hypothetical protein (1)                                        |                                        |                                                                                                                                                                                                                                                                                                                                        |                                                                                                                                                                                                                                                                                                                                                                       |                              | P_trifoliata_00900_mRNA_5,1     |
| GF0051011 | 0                            | 0                         | 1                            | Hypothetical protein (1)                                        |                                        |                                                                                                                                                                                                                                                                                                                                        |                                                                                                                                                                                                                                                                                                                                                                       |                              | P_trifoliata_00899_mRNA_2,1     |
| GF0051010 | 0                            | 0                         | 1                            | Hypothetical protein (1)                                        | GTP binding [GO:0005525]               | molecular_function (1); GTPase activity [GO:0005924 molecular_function] (1)                                                                                                                                                                                                                                                            | Dynamis GTPase effector [IPRO03130] (1); Dynamis superfamily [IPRO22812] (1); GTPase effector domain [IPRO20850] (1)                                                                                                                                                                                                                                                  |                              | P_trifoliata_00898_mRNA_7,1     |
| GF0051009 | 0                            | 0                         | 1                            | DYNAMIN-like 1E isoform 3 (1)                                   | GTP binding [GO:0005525]               | molecular_function (1)                                                                                                                                                                                                                                                                                                                 | PH domain-like [IPRO11993] (1); P-loop containing nucleoside triphosphate hydrolase [IPRO27417] (1); Pleckstrin homology domain [IPRO01849] (1); Dynamis superfamily [IPRO22812] (1); Dynamis-type guanine nucleotide binding (G) domain [IPRO30381] (1)                                                                                                              |                              | P_trifoliata_00898_mRNA_6,1     |
| GF0051008 | 0                            | 0                         | 1                            | Hypothetical protein (1)                                        |                                        |                                                                                                                                                                                                                                                                                                                                        |                                                                                                                                                                                                                                                                                                                                                                       |                              | P_trifoliata_00898_mRNA_4,1     |
| GF0051007 | 0                            | 0                         | 1                            | Hypothetical protein (1)                                        |                                        |                                                                                                                                                                                                                                                                                                                                        |                                                                                                                                                                                                                                                                                                                                                                       |                              | P_trifoliata_00898_mRNA_3,1     |
| GF0051006 | 0                            | 0                         | 1                            | Hypothetical protein (1)                                        |                                        |                                                                                                                                                                                                                                                                                                                                        |                                                                                                                                                                                                                                                                                                                                                                       |                              | P_trifoliata_00898_mRNA_1,1     |
| GF0051005 | 0                            | 0                         | 1                            | Hypothetical protein (1)                                        |                                        |                                                                                                                                                                                                                                                                                                                                        |                                                                                                                                                                                                                                                                                                                                                                       |                              | P_trifoliata_00897_mRNA_6,1     |
| GF0051004 | 0                            | 0                         | 1                            | Hypothetical protein (1)                                        |                                        |                                                                                                                                                                                                                                                                                                                                        |                                                                                                                                                                                                                                                                                                                                                                       |                              | P_trifoliata_00897_mRNA_5,1     |
| GF0051003 | 0                            | 0                         | 1                            | Hypothetical protein (1)                                        |                                        |                                                                                                                                                                                                                                                                                                                                        |                                                                                                                                                                                                                                                                                                                                                                       |                              | P_trifoliata_00897_mRNA_4,1     |
| GF0051002 | 0                            | 0                         | 1                            | Hypothetical protein (1)                                        |                                        |                                                                                                                                                                                                                                                                                                                                        |                                                                                                                                                                                                                                                                                                                                                                       |                              | P_trifoliata_00897_mRNA_1,1     |
| GF0051001 | 0                            | 0                         | 1                            | Hypothetical protein (1)                                        | electron carrier activity [GO:0009055] | molecular_function (1); protein complex scaffold [GO:0032947]                                                                                                                                                                                                                                                                          | Proteasome component Ecm29/Translational activator Gcn1 [IPRO20827] (1); Phytoeyanin domain [IPRO03245] (1); Cyspeptidase [IPRO08972] (1); Proteasome component Ecm29 [IPRO24372] (1)                                                                                                                                                                                 |                              | P_trifoliata_00896_mRNA_5,1     |
| GF0051000 | 0                            | 0                         | 1                            | Hypothetical protein (1)                                        |                                        |                                                                                                                                                                                                                                                                                                                                        |                                                                                                                                                                                                                                                                                                                                                                       |                              | P_trifoliata_00896_mRNA_3,1     |
| GF0050999 | 0                            | 0                         | 1                            | Hypothetical protein (1)                                        |                                        |                                                                                                                                                                                                                                                                                                                                        |                                                                                                                                                                                                                                                                                                                                                                       |                              | P_trifoliata_00895_mRNA_7,1     |
| GF0050998 | 0                            | 0                         | 1                            | Hypothetical protein (1)                                        | zinc ion binding [GO:0008270]          | molecular_function (1); nucleic acid binding [GO:0003676]                                                                                                                                                                                                                                                                              | Domain of unknown function DUF4283 [IPRO25558] (1); Zinc knuckle CXC2C4HX4C [IPRO25836] (1); Zinc finger, CCHC-type [IPRO01878] (1)                                                                                                                                                                                                                                   |                              | P_trifoliata_00895_mRNA_4,1     |
| GF0050997 | 0                            | 0                         | 1                            | Hypothetical protein (1)                                        |                                        |                                                                                                                                                                                                                                                                                                                                        |                                                                                                                                                                                                                                                                                                                                                                       |                              | P_trifoliata_00895_mRNA_2,1     |
| GF0050996 | 0                            | 0                         | 1                            | Hypothetical protein (1)                                        |                                        |                                                                                                                                                                                                                                                                                                                                        |                                                                                                                                                                                                                                                                                                                                                                       |                              | P_trifoliata_00895_mRNA_1,1     |
| GF0050995 | 0                            | 0                         | 1                            | 4-hydroxy-3-methylbut-2-enyl diphosphatereductase (1)           | metal ion binding [GO:0046872]         | molecular_function (1); isopentenyl diphosphate biosynthetic process, methylerythritol 4-phosphate pathway [GO:0019288 biological_process] (1); 4-hydroxy-3-methylbut-2-en-1-yl diphosphate reductase activity [GO:0051745 molecular_function] (1); dimethylallyl diphosphate biosynthetic process [GO:0050992 biological_process] (1) | 4-hydroxy-3-methylbut-2-enyl diphosphate reductase [IPRO03451] (1)                                                                                                                                                                                                                                                                                                    |                              | P_trifoliata_00894_mRNA_9,1     |

| ID       | Num. in <i>C. clementiae</i> | Num. in <i>C. autohii</i> | Num. in <i>P. trifoliata</i> | Note                                               | GO                                                                                                                                                                                                                                                                                                                                       | InterPro                                                                                                                                                                                                                                                | Members in <i>C. clementiae</i> | Members in <i>C. autohii</i> | Members in <i>P. trifoliata</i> |
|----------|------------------------------|---------------------------|------------------------------|----------------------------------------------------|------------------------------------------------------------------------------------------------------------------------------------------------------------------------------------------------------------------------------------------------------------------------------------------------------------------------------------------|---------------------------------------------------------------------------------------------------------------------------------------------------------------------------------------------------------------------------------------------------------|---------------------------------|------------------------------|---------------------------------|
| GF005094 | 0                            | 0                         | 1                            | Hypothetical protein (1)                           |                                                                                                                                                                                                                                                                                                                                          | PUL domain [IPR013535] (1)                                                                                                                                                                                                                              | -                               | -                            | P_trifoliata_00894_miRNA_8,1    |
| GF005093 | 0                            | 0                         | 1                            | Hypothetical protein (1)                           |                                                                                                                                                                                                                                                                                                                                          |                                                                                                                                                                                                                                                         | -                               | -                            | P_trifoliata_00894_miRNA_7,1    |
| GF005092 | 0                            | 0                         | 1                            | Hypothetical protein (1)                           |                                                                                                                                                                                                                                                                                                                                          |                                                                                                                                                                                                                                                         | -                               | -                            | P_trifoliata_00894_miRNA_3,1    |
| GF005091 | 0                            | 0                         | 1                            | Hypothetical protein (1)                           |                                                                                                                                                                                                                                                                                                                                          |                                                                                                                                                                                                                                                         | -                               | -                            | P_trifoliata_00893_miRNA_3,1    |
| GF005090 | 0                            | 0                         | 1                            | Hypothetical protein (1)                           | oxidation-reduction process [GO:005114 biological_process] (1); oxidoreductase activity [GO:0016491 molecular_function] (1)                                                                                                                                                                                                              | Oxoglutarate (iron-dependent) dioxygenase [IPR005123] (1); Isopenicillin N synthase-like [IPR027443] (1)                                                                                                                                                | -                               | -                            | P_trifoliata_00893_miRNA_1,1    |
| GF005089 | 0                            | 0                         | 1                            | Hypothetical protein (1)                           |                                                                                                                                                                                                                                                                                                                                          |                                                                                                                                                                                                                                                         | -                               | -                            | P_trifoliata_00892_miRNA_6,1    |
| GF005088 | 0                            | 0                         | 1                            | Hypothetical protein (1)                           | protein binding [GO:0005515 molecular_function] (1)                                                                                                                                                                                                                                                                                      | NPR1/NIM1-like, C-terminal [IPR021094] (1); BTB/POZ domain [IPR00210] (1); Ankyrin repeat-containing domain [IPR020683] (1); Regulatory protein NPR, central domain [IPR024228] (1); SKP1/BTB/POZ domain [IPR011533] (1); Ankyrin repeat [IPR02110] (1) | -                               | -                            | P_trifoliata_00892_miRNA_3,1    |
| GF005087 | 0                            | 0                         | 1                            | Hypothetical protein (1)                           |                                                                                                                                                                                                                                                                                                                                          |                                                                                                                                                                                                                                                         | -                               | -                            | P_trifoliata_00891_miRNA_8,1    |
| GF005086 | 0                            | 0                         | 1                            | Hypothetical protein (1)                           |                                                                                                                                                                                                                                                                                                                                          |                                                                                                                                                                                                                                                         | -                               | -                            | P_trifoliata_00891_miRNA_7,1    |
| GF005085 | 0                            | 0                         | 1                            | Hypothetical protein (1)                           |                                                                                                                                                                                                                                                                                                                                          |                                                                                                                                                                                                                                                         | -                               | -                            | P_trifoliata_00891_miRNA_6,1    |
| GF005084 | 0                            | 0                         | 1                            | Hypothetical protein (1)                           |                                                                                                                                                                                                                                                                                                                                          |                                                                                                                                                                                                                                                         | -                               | -                            | P_trifoliata_00891_miRNA_5,1    |
| GF005083 | 0                            | 0                         | 1                            | Hypothetical protein (1)                           |                                                                                                                                                                                                                                                                                                                                          |                                                                                                                                                                                                                                                         | -                               | -                            | P_trifoliata_00891_miRNA_3,1    |
| GF005082 | 0                            | 0                         | 1                            | Hypothetical protein (1)                           | outer membrane [GO:0019867 cellular_component] (1)                                                                                                                                                                                                                                                                                       | Bacterial surface antigen (D15) [IPR000184] (1)                                                                                                                                                                                                         | -                               | -                            | P_trifoliata_00891_miRNA_2,1    |
| GF005081 | 0                            | 0                         | 1                            | Hypothetical protein (1)                           |                                                                                                                                                                                                                                                                                                                                          |                                                                                                                                                                                                                                                         | -                               | -                            | P_trifoliata_00891_miRNA_15,1   |
| GF005080 | 0                            | 0                         | 1                            | Hypothetical protein (1)                           |                                                                                                                                                                                                                                                                                                                                          |                                                                                                                                                                                                                                                         | -                               | -                            | P_trifoliata_00891_miRNA_14,1   |
| GF005079 | 0                            | 0                         | 1                            | Hypothetical protein (1)                           |                                                                                                                                                                                                                                                                                                                                          |                                                                                                                                                                                                                                                         | -                               | -                            | P_trifoliata_00891_miRNA_13,1   |
| GF005078 | 0                            | 0                         | 1                            | Hypothetical protein (1)                           |                                                                                                                                                                                                                                                                                                                                          |                                                                                                                                                                                                                                                         | -                               | -                            | P_trifoliata_00891_miRNA_1,1    |
| GF005077 | 0                            | 0                         | 1                            | Hypothetical protein (1)                           |                                                                                                                                                                                                                                                                                                                                          |                                                                                                                                                                                                                                                         | -                               | -                            | P_trifoliata_00890_miRNA_1,1    |
| GF005076 | 0                            | 0                         | 1                            | NAC domain-containing protein 2 (1)                | DNA binding [GO:0003677 molecular_function] (1); regulation of transcription, DNA-templated [GO:0006355 biological_process] (1)                                                                                                                                                                                                          | NAC domain [IPR003441] (1)                                                                                                                                                                                                                              | -                               | -                            | P_trifoliata_00889_miRNA_8,1    |
| GF005075 | 0                            | 0                         | 1                            | Hypothetical protein (1)                           |                                                                                                                                                                                                                                                                                                                                          |                                                                                                                                                                                                                                                         | -                               | -                            | P_trifoliata_00889_miRNA_5,1    |
| GF005074 | 0                            | 0                         | 1                            | Hypothetical protein (1)                           |                                                                                                                                                                                                                                                                                                                                          | Reverse transcriptase, RNA-dependent DNA polymerase [IPR013103] (1)                                                                                                                                                                                     | -                               | -                            | P_trifoliata_00889_miRNA_2,1    |
| GF005073 | 0                            | 0                         | 1                            | Hypothetical protein (1)                           |                                                                                                                                                                                                                                                                                                                                          | Squalene cyclase, N-terminal [IPR022697] (1); Terpenoid cyclases protein prenyltransferase alpha-alpha tercol [IPR008950] (1)                                                                                                                           | -                               | -                            | P_trifoliata_00889_miRNA_1,1    |
| GF005072 | 0                            | 0                         | 1                            | Hypothetical protein (1)                           |                                                                                                                                                                                                                                                                                                                                          |                                                                                                                                                                                                                                                         | -                               | -                            | P_trifoliata_00887_miRNA_7,1    |
| GF005071 | 0                            | 0                         | 1                            | Hypothetical protein (1)                           |                                                                                                                                                                                                                                                                                                                                          |                                                                                                                                                                                                                                                         | -                               | -                            | P_trifoliata_00887_miRNA_3,1    |
| GF005070 | 0                            | 0                         | 1                            | Hypothetical protein (1)                           |                                                                                                                                                                                                                                                                                                                                          |                                                                                                                                                                                                                                                         | -                               | -                            | P_trifoliata_00886_miRNA_4,1    |
| GF005069 | 0                            | 0                         | 1                            | Hypothetical protein (1)                           |                                                                                                                                                                                                                                                                                                                                          |                                                                                                                                                                                                                                                         | -                               | -                            | P_trifoliata_00885_miRNA_6,1    |
| GF005068 | 0                            | 0                         | 1                            | Hypothetical protein (1)                           |                                                                                                                                                                                                                                                                                                                                          |                                                                                                                                                                                                                                                         | -                               | -                            | P_trifoliata_00885_miRNA_1,1    |
| GF005067 | 0                            | 0                         | 1                            | Hypothetical protein (1)                           | protein binding [GO:0005515 molecular_function] (1)                                                                                                                                                                                                                                                                                      | Leucine-rich repeat domain, L domain-like [IPR032675] (1); Leucine-rich repeat, typical subtype [IPR003591] (1); Leucine-rich repeat 3 [IPR011713] (1); Leucine-rich repeat [IPR001611] (1)                                                             | -                               | -                            | P_trifoliata_00884_miRNA_2,1    |
| GF005066 | 0                            | 0                         | 1                            | Hypothetical protein (1)                           |                                                                                                                                                                                                                                                                                                                                          |                                                                                                                                                                                                                                                         | -                               | -                            | P_trifoliata_00883_miRNA_3,1    |
| GF005065 | 0                            | 0                         | 1                            | Hypothetical protein (1)                           |                                                                                                                                                                                                                                                                                                                                          |                                                                                                                                                                                                                                                         | -                               | -                            | P_trifoliata_00881_miRNA_9,1    |
| GF005064 | 0                            | 0                         | 1                            | Hypothetical protein (1)                           |                                                                                                                                                                                                                                                                                                                                          | Domain of unknown function DUF4283 [IPR025558] (1)                                                                                                                                                                                                      | -                               | -                            | P_trifoliata_00881_miRNA_8,1    |
| GF005063 | 0                            | 0                         | 1                            | Hypothetical protein (1)                           |                                                                                                                                                                                                                                                                                                                                          |                                                                                                                                                                                                                                                         | -                               | -                            | P_trifoliata_00881_miRNA_6,1    |
| GF005062 | 0                            | 0                         | 1                            | Hypothetical protein (1)                           |                                                                                                                                                                                                                                                                                                                                          |                                                                                                                                                                                                                                                         | -                               | -                            | P_trifoliata_00879_miRNA_6,1    |
| GF005061 | 0                            | 0                         | 1                            | Hypothetical protein (1)                           |                                                                                                                                                                                                                                                                                                                                          |                                                                                                                                                                                                                                                         | -                               | -                            | P_trifoliata_00879_miRNA_5,1    |
| GF005060 | 0                            | 0                         | 1                            | Hypothetical protein (1)                           | catalytic activity [GO:0003824 molecular_function] (1); metabolic process [GO:0008152 biological_process] (1)                                                                                                                                                                                                                            | ClpP/serotonase-like domain [IPR029045] (1); Crotonase superfamily [IPR001753] (1)                                                                                                                                                                      | -                               | -                            | P_trifoliata_00878_miRNA_1,1    |
| GF005059 | 0                            | 0                         | 1                            | Hypothetical protein (1)                           | protein binding [GO:0005515 molecular_function] (1)                                                                                                                                                                                                                                                                                      | Leucine-rich repeat domain, L domain-like [IPR032675] (1); Leucine-rich repeat [IPR001611] (1)                                                                                                                                                          | -                               | -                            | P_trifoliata_00877_miRNA_8,1    |
| GF005058 | 0                            | 0                         | 1                            | Hypothetical protein (1)                           |                                                                                                                                                                                                                                                                                                                                          |                                                                                                                                                                                                                                                         | -                               | -                            | P_trifoliata_00877_miRNA_7,1    |
| GF005057 | 0                            | 0                         | 1                            | Zinc finger containing protein, putative (1)       |                                                                                                                                                                                                                                                                                                                                          |                                                                                                                                                                                                                                                         | -                               | -                            | P_trifoliata_00877_miRNA_6,1    |
| GF005056 | 0                            | 0                         | 1                            | Peptide transporter PTR2 (1)                       | transport [GO:0006810 biological_process] (1); membrane [GO:0016020 cellular_component] (1); oligopeptide transport [GO:0006857 biological_process] (1); transporter activity [GO:0005215 molecular_function] (1)                                                                                                                        | Major facilitator superfamily domain [IPR020846] (1); Proton-dependent oligopeptide transporter family [IPR00109] (1); PTR2 family proton/oligopeptide symporter, conserved site [IPR018456] (1)                                                        | -                               | -                            | P_trifoliata_00877_miRNA_1,1    |
| GF005055 | 0                            | 0                         | 1                            | Cytochrome P450 family 88 protein (1)              | oxidoreductase activity, acting on paired donors, with incorporation or reduction of molecular oxygen [GO:0016705 molecular_function] (1); oxidation-reduction process [GO:005114 biological_process] (1); iron ion binding [GO:0005506 molecular_function] (1); heme binding [GO:0020037 molecular_function] (1)                        | Cytochrome P450 [IPR001128] (1)                                                                                                                                                                                                                         | -                               | -                            | P_trifoliata_00876_miRNA_4,2    |
| GF005054 | 0                            | 0                         | 1                            | Hypothetical protein (1)                           |                                                                                                                                                                                                                                                                                                                                          |                                                                                                                                                                                                                                                         | -                               | -                            | P_trifoliata_00876_miRNA_1,1    |
| GF005053 | 0                            | 0                         | 1                            | Caffeic acid 3-O-methyltransferase 1 isoform 2 (1) | methyltransferase activity [GO:0008168 molecular_function] (1); O-methyltransferase activity [GO:0008171 molecular_function] (1)                                                                                                                                                                                                         | S-adenosyl-L-methionine-dependent methyltransferase [IPR029063] (1); O-methyltransferase COMT-type [IPR014461] (1); O-methyltransferase, family 2 [IPR01077] (1); Winged helix-turn-helix DNA-binding domain [IPR011991] (1)                            | -                               | -                            | P_trifoliata_00875_miRNA_6,1    |
| GF005052 | 0                            | 0                         | 1                            | Hypothetical protein (1)                           |                                                                                                                                                                                                                                                                                                                                          |                                                                                                                                                                                                                                                         | -                               | -                            | P_trifoliata_00875_miRNA_4,1    |
| GF005051 | 0                            | 0                         | 1                            | Hypothetical protein (1)                           |                                                                                                                                                                                                                                                                                                                                          |                                                                                                                                                                                                                                                         | -                               | -                            | P_trifoliata_00875_miRNA_2,1    |
| GF005050 | 0                            | 0                         | 1                            | Hypothetical protein (1)                           | extracellular region [GO:0005576 cellular_component] (1)                                                                                                                                                                                                                                                                                 | Expansin/Le p [IPR007118] (1); Expansin/pollen allergen, DRBB domain [IPR007112] (1); RipA-like double-psi beta-sheet domain [IPR009099] (1)                                                                                                            | -                               | -                            | P_trifoliata_00874_miRNA_4,1    |
| GF005049 | 0                            | 0                         | 1                            | Hypothetical protein (1)                           |                                                                                                                                                                                                                                                                                                                                          | Histidine kinase-like ATPase, C-terminal domain [IPR003594] (1)                                                                                                                                                                                         | -                               | -                            | P_trifoliata_00873_miRNA_8,1    |
| GF005048 | 0                            | 0                         | 1                            | Hypothetical protein (1)                           |                                                                                                                                                                                                                                                                                                                                          |                                                                                                                                                                                                                                                         | -                               | -                            | P_trifoliata_00873_miRNA_6,1    |
| GF005047 | 0                            | 0                         | 1                            | Hypothetical protein (1)                           |                                                                                                                                                                                                                                                                                                                                          |                                                                                                                                                                                                                                                         | -                               | -                            | P_trifoliata_00873_miRNA_3,1    |
| GF005046 | 0                            | 0                         | 1                            | Hypothetical protein (1)                           | binding [GO:0005488 molecular_function] (1)                                                                                                                                                                                                                                                                                              | Armadillo-type fold [IPR016024] (1)                                                                                                                                                                                                                     | -                               | -                            | P_trifoliata_00873_miRNA_1,1    |
| GF005045 | 0                            | 0                         | 1                            | Hypothetical protein (1)                           |                                                                                                                                                                                                                                                                                                                                          |                                                                                                                                                                                                                                                         | -                               | -                            | P_trifoliata_00872_miRNA_8,1    |
| GF005044 | 0                            | 0                         | 1                            | Hypothetical protein (1)                           |                                                                                                                                                                                                                                                                                                                                          | Protein of unknown function DUF247, plant [IPR004158] (1)                                                                                                                                                                                               | -                               | -                            | P_trifoliata_00872_miRNA_4,1    |
| GF005043 | 0                            | 0                         | 1                            | Hypothetical protein (1)                           |                                                                                                                                                                                                                                                                                                                                          | GaEL-like apical domain [IPR027409] (1)                                                                                                                                                                                                                 | -                               | -                            | P_trifoliata_00871_miRNA_8,1    |
| GF005042 | 0                            | 0                         | 1                            | Hypothetical protein (1)                           |                                                                                                                                                                                                                                                                                                                                          | Retroviral gag domain [IPR005162] (1)                                                                                                                                                                                                                   | -                               | -                            | P_trifoliata_00871_miRNA_6,1    |
| GF005041 | 0                            | 0                         | 1                            | Hypothetical protein (1)                           |                                                                                                                                                                                                                                                                                                                                          |                                                                                                                                                                                                                                                         | -                               | -                            | P_trifoliata_00871_miRNA_4,1    |
| GF005040 | 0                            | 0                         | 1                            | En Sps-like transposon protein (1)                 |                                                                                                                                                                                                                                                                                                                                          |                                                                                                                                                                                                                                                         | -                               | -                            | P_trifoliata_00871_miRNA_3,1    |
| GF005039 | 0                            | 0                         | 1                            | Hypothetical protein (1)                           |                                                                                                                                                                                                                                                                                                                                          |                                                                                                                                                                                                                                                         | -                               | -                            | P_trifoliata_00870_miRNA_6,1    |
| GF005038 | 0                            | 0                         | 1                            | Hypothetical protein (1)                           | oxidation-reduction process [GO:005114 biological_process] (1); oxidoreductase activity [GO:0016491 molecular_function] (1); flavin adenine dinucleotide binding [GO:0050660 molecular_function] (1); NADP binding [GO:0050661 molecular_function] (1); N,N-dimethylamylamine monooxygenase activity [GO:0004499 molecular_function] (1) | Flavin monooxygenase-like [IPR029046] (1); FAD/NAD(P)+binding domain [IPR023753] (1)                                                                                                                                                                    | -                               | -                            | P_trifoliata_00869_miRNA_8,1    |
| GF005037 | 0                            | 0                         | 1                            | Hypothetical protein (1)                           |                                                                                                                                                                                                                                                                                                                                          |                                                                                                                                                                                                                                                         | -                               | -                            | P_trifoliata_00869_miRNA_7,1    |
| GF005036 | 0                            | 0                         | 1                            | Hypothetical protein (1)                           |                                                                                                                                                                                                                                                                                                                                          |                                                                                                                                                                                                                                                         | -                               | -                            | P_trifoliata_00869_miRNA_4,1    |
| GF005035 | 0                            | 0                         | 1                            | Hypothetical protein (1)                           |                                                                                                                                                                                                                                                                                                                                          |                                                                                                                                                                                                                                                         | -                               | -                            | P_trifoliata_00868_miRNA_7,1    |
| GF005034 | 0                            | 0                         | 1                            | Glutathione S-transferase tau 7, putative (1)      |                                                                                                                                                                                                                                                                                                                                          | Glutathione S-transferase, C-terminal-like [IPR010987] (1); Glutathione S-transferase, C-terminal [IPR004046] (1)                                                                                                                                       | -                               | -                            | P_trifoliata_00868_miRNA_6,1    |
| GF005033 | 0                            | 0                         | 1                            | Hypothetical protein (1)                           |                                                                                                                                                                                                                                                                                                                                          |                                                                                                                                                                                                                                                         | -                               | -                            | P_trifoliata_00868_miRNA_1,1    |
| GF005032 | 0                            | 0                         | 1                            | Hypothetical protein (1)                           |                                                                                                                                                                                                                                                                                                                                          |                                                                                                                                                                                                                                                         | -                               | -                            | P_trifoliata_00867_miRNA_4,1    |
| GF005031 | 0                            | 0                         | 1                            | Hypothetical protein (1)                           |                                                                                                                                                                                                                                                                                                                                          |                                                                                                                                                                                                                                                         | -                               | -                            | P_trifoliata_00867_miRNA_3,1    |
| GF005030 | 0                            | 0                         | 1                            | Hypothetical protein (1)                           |                                                                                                                                                                                                                                                                                                                                          | Pentatricopeptide repeat [IPR002885] (1)                                                                                                                                                                                                                | -                               | -                            | P_trifoliata_00866_miRNA_7,1    |
| GF005029 | 0                            | 0                         | 1                            | Pentatricopeptide repeat (PPR) repeat protein (1)  |                                                                                                                                                                                                                                                                                                                                          | Pentatricopeptide repeat [IPR002885] (1)                                                                                                                                                                                                                | -                               | -                            | P_trifoliata_00866_miRNA_5,1    |
| GF005028 | 0                            | 0                         | 1                            | Hypothetical protein (1)                           |                                                                                                                                                                                                                                                                                                                                          |                                                                                                                                                                                                                                                         | -                               | -                            | P_trifoliata_00865_miRNA_1,1    |
| GF005027 | 0                            | 0                         | 1                            | Hypothetical protein (1)                           |                                                                                                                                                                                                                                                                                                                                          |                                                                                                                                                                                                                                                         | -                               | -                            | P_trifoliata_00864_miRNA_7,1    |
| GF005026 | 0                            | 0                         | 1                            | Hypothetical protein (1)                           |                                                                                                                                                                                                                                                                                                                                          |                                                                                                                                                                                                                                                         | -                               | -                            | P_trifoliata_00864_miRNA_6,1    |
| GF005025 | 0                            | 0                         | 1                            | Hypothetical protein (1)                           |                                                                                                                                                                                                                                                                                                                                          |                                                                                                                                                                                                                                                         | -                               | -                            | P_trifoliata_00864_miRNA_5,1    |
| GF005024 | 0                            | 0                         | 1                            | Hypothetical protein (1)                           | nucleic acid binding [GO:0003676 molecular_function] (1)                                                                                                                                                                                                                                                                                 | Ribonuclease H-like domain [IPR012337] (1)                                                                                                                                                                                                              | -                               | -                            | P_trifoliata_00864_miRNA_4,1    |
| GF005023 | 0                            | 0                         | 1                            | Hypothetical protein (1)                           |                                                                                                                                                                                                                                                                                                                                          |                                                                                                                                                                                                                                                         | -                               | -                            | P_trifoliata_00864_miRNA_3,1    |
| GF005022 | 0                            | 0                         | 1                            | Hypothetical protein (1)                           |                                                                                                                                                                                                                                                                                                                                          |                                                                                                                                                                                                                                                         | -                               | -                            | P_trifoliata_00863_miRNA_1,1    |
| GF005021 | 0                            | 0                         | 1                            | Hypothetical protein (1)                           |                                                                                                                                                                                                                                                                                                                                          |                                                                                                                                                                                                                                                         | -                               | -                            | P_trifoliata_00862_miRNA_9,1    |

| ID       | Num. in <i>C. celerans</i> | Num. in <i>C. canihii</i> | Num. in <i>P. trifoliata</i> | Note                                                     | GO                                                                                                                                                                                                                                                                                                                                                                                                                                                                                                                                                          | InterPro                                                                                                                                                                                                                                                                                                                                                                                                                                                                                                | Members in <i>C. celerans</i> | Members in <i>C. canihii</i> | Members in <i>P. trifoliata</i> |
|----------|----------------------------|---------------------------|------------------------------|----------------------------------------------------------|-------------------------------------------------------------------------------------------------------------------------------------------------------------------------------------------------------------------------------------------------------------------------------------------------------------------------------------------------------------------------------------------------------------------------------------------------------------------------------------------------------------------------------------------------------------|---------------------------------------------------------------------------------------------------------------------------------------------------------------------------------------------------------------------------------------------------------------------------------------------------------------------------------------------------------------------------------------------------------------------------------------------------------------------------------------------------------|-------------------------------|------------------------------|---------------------------------|
| GF005020 | 0                          | 0                         | 0                            | 1 Hypothetical protein (1)                               |                                                                                                                                                                                                                                                                                                                                                                                                                                                                                                                                                             |                                                                                                                                                                                                                                                                                                                                                                                                                                                                                                         | -                             | -                            | P_trifoliata_00862_mRNA_4,1     |
| GF005019 | 0                          | 0                         | 0                            | 1 Hypothetical protein (1)                               |                                                                                                                                                                                                                                                                                                                                                                                                                                                                                                                                                             |                                                                                                                                                                                                                                                                                                                                                                                                                                                                                                         | -                             | -                            | P_trifoliata_00862_mRNA_15,1    |
| GF005018 | 0                          | 0                         | 0                            | 1 Hypothetical protein (1)                               |                                                                                                                                                                                                                                                                                                                                                                                                                                                                                                                                                             |                                                                                                                                                                                                                                                                                                                                                                                                                                                                                                         | -                             | -                            | P_trifoliata_00862_mRNA_14,1    |
| GF005017 | 0                          | 0                         | 0                            | 1 Hypothetical protein (1)                               |                                                                                                                                                                                                                                                                                                                                                                                                                                                                                                                                                             |                                                                                                                                                                                                                                                                                                                                                                                                                                                                                                         | -                             | -                            | P_trifoliata_00862_mRNA_12,1    |
| GF005016 | 0                          | 0                         | 0                            | 1 Hypothetical protein (1)                               |                                                                                                                                                                                                                                                                                                                                                                                                                                                                                                                                                             |                                                                                                                                                                                                                                                                                                                                                                                                                                                                                                         | -                             | -                            | P_trifoliata_00862_mRNA_11,1    |
| GF005015 | 0                          | 0                         | 0                            | 1 Hypothetical protein (1)                               |                                                                                                                                                                                                                                                                                                                                                                                                                                                                                                                                                             |                                                                                                                                                                                                                                                                                                                                                                                                                                                                                                         | -                             | -                            | P_trifoliata_00862_mRNA_10,1    |
| GF005014 | 0                          | 0                         | 0                            | 1 Hypothetical protein (1)                               |                                                                                                                                                                                                                                                                                                                                                                                                                                                                                                                                                             |                                                                                                                                                                                                                                                                                                                                                                                                                                                                                                         | -                             | -                            | P_trifoliata_00861_mRNA_7,1     |
| GF005013 | 0                          | 0                         | 0                            | 1 Hypothetical protein (1)                               |                                                                                                                                                                                                                                                                                                                                                                                                                                                                                                                                                             |                                                                                                                                                                                                                                                                                                                                                                                                                                                                                                         | -                             | -                            | P_trifoliata_00861_mRNA_6,1     |
| GF005012 | 0                          | 0                         | 0                            | 1 Hypothetical protein (1)                               |                                                                                                                                                                                                                                                                                                                                                                                                                                                                                                                                                             |                                                                                                                                                                                                                                                                                                                                                                                                                                                                                                         | -                             | -                            | P_trifoliata_00861_mRNA_19,1    |
| GF005011 | 0                          | 0                         | 0                            | 1 Hypothetical protein (1)                               |                                                                                                                                                                                                                                                                                                                                                                                                                                                                                                                                                             |                                                                                                                                                                                                                                                                                                                                                                                                                                                                                                         | -                             | -                            | P_trifoliata_00861_mRNA_17,1    |
| GF005010 | 0                          | 0                         | 0                            | 1 Hypothetical protein (1)                               | regulation of transcription, DNA-templated [GO:0006355]<br>biological_process (1)                                                                                                                                                                                                                                                                                                                                                                                                                                                                           | FHY3/FAR1 family [IPR031052] (1);<br>MULE transposase domain [IPR018289] (1)                                                                                                                                                                                                                                                                                                                                                                                                                            | -                             | -                            | P_trifoliata_00861_mRNA_16,1    |
| GF005009 | 0                          | 0                         | 0                            | 1 Hypothetical protein (1)                               |                                                                                                                                                                                                                                                                                                                                                                                                                                                                                                                                                             |                                                                                                                                                                                                                                                                                                                                                                                                                                                                                                         | -                             | -                            | P_trifoliata_00861_mRNA_14,1    |
| GF005008 | 0                          | 0                         | 0                            | 1 Hypothetical protein (1)                               |                                                                                                                                                                                                                                                                                                                                                                                                                                                                                                                                                             |                                                                                                                                                                                                                                                                                                                                                                                                                                                                                                         | -                             | -                            | P_trifoliata_00861_mRNA_12,1    |
| GF005007 | 0                          | 0                         | 0                            | 1 Hypothetical protein (1)                               |                                                                                                                                                                                                                                                                                                                                                                                                                                                                                                                                                             |                                                                                                                                                                                                                                                                                                                                                                                                                                                                                                         | -                             | -                            | P_trifoliata_00861_mRNA_11,1    |
| GF005006 | 0                          | 0                         | 0                            | 1 Hypothetical protein (1)                               |                                                                                                                                                                                                                                                                                                                                                                                                                                                                                                                                                             | Viral movement protein [IPR028919] (1)                                                                                                                                                                                                                                                                                                                                                                                                                                                                  | -                             | -                            | P_trifoliata_00860_mRNA_5,1     |
| GF005005 | 0                          | 0                         | 0                            | 1 Chaperonin ATPase (1)                                  | ATP binding [GO:0005524]<br>molecular_function (1)                                                                                                                                                                                                                                                                                                                                                                                                                                                                                                          | Chaperonin Cpn60/TCP-1 family [IPR002423] (1); TCP-1-like chaperonin interdomain domain [IPR021401] (1); GroEL-like apical domain [IPR027409] (1); GroEL-like equatorial domain [IPR027413] (1)                                                                                                                                                                                                                                                                                                         | -                             | -                            | P_trifoliata_00860_mRNA_4,1     |
| GF005004 | 0                          | 0                         | 0                            | 1 Hypothetical protein (1)                               | protein binding [GO:0005515]<br>molecular_function (1)                                                                                                                                                                                                                                                                                                                                                                                                                                                                                                      | Leucine-rich repeat [IPR016111] (1); Leucine-rich repeat domain, L domain-like [IPR032675] (1); Leucine-rich repeat, typical subtype [IPR035911] (1)                                                                                                                                                                                                                                                                                                                                                    | -                             | -                            | P_trifoliata_00859_mRNA_6,1     |
| GF005003 | 0                          | 0                         | 0                            | 1 NBS type disease resistance protein (1)                | protein binding [GO:0005515]<br>molecular_function (1); signal transduction [GO:0007165]<br>biological_process (1); ADP binding [GO:0043531]<br>molecular_function (1)                                                                                                                                                                                                                                                                                                                                                                                      | Toll/interleukin-1 receptor homology (TIR) domain [IPR000157] (1); NB-ARC [IPR002182] (1); P-loop containing nucleoside triphosphate hydrolase [IPR027417] (1)                                                                                                                                                                                                                                                                                                                                          | -                             | -                            | P_trifoliata_00859_mRNA_5,1     |
| GF005002 | 0                          | 0                         | 0                            | 1 Hypothetical protein (1)                               |                                                                                                                                                                                                                                                                                                                                                                                                                                                                                                                                                             |                                                                                                                                                                                                                                                                                                                                                                                                                                                                                                         | -                             | -                            | P_trifoliata_00859_mRNA_4,1     |
| GF005001 | 0                          | 0                         | 0                            | 1 Hypothetical protein (1)                               |                                                                                                                                                                                                                                                                                                                                                                                                                                                                                                                                                             |                                                                                                                                                                                                                                                                                                                                                                                                                                                                                                         | -                             | -                            | P_trifoliata_00859_mRNA_3,1     |
| GF005000 | 0                          | 0                         | 0                            | 1 Hypothetical protein (1)                               |                                                                                                                                                                                                                                                                                                                                                                                                                                                                                                                                                             |                                                                                                                                                                                                                                                                                                                                                                                                                                                                                                         | -                             | -                            | P_trifoliata_00859_mRNA_2,1     |
| GF005000 | 0                          | 0                         | 0                            | 1 Hypothetical protein (1)                               | NADP binding [GO:0050661]<br>molecular_function (1); glucose metabolic process [GO:0006006]<br>biological_process (1); glucose-6-phosphate dehydrogenase activity [GO:0004345]<br>molecular_function (1); oxidation-reduction process [GO:005114]<br>biological_process (1)                                                                                                                                                                                                                                                                                 | Glucose-6-phosphate dehydrogenase, NAD-binding [IPR025741] (1); Glucose-6-phosphate dehydrogenase [IPR001282] (1); NAD(P)-binding domain [IPR016040] (1)                                                                                                                                                                                                                                                                                                                                                | -                             | -                            | P_trifoliata_00859_mRNA_1,1     |
| GF005000 | 0                          | 0                         | 0                            | 1 Hypothetical protein (1)                               |                                                                                                                                                                                                                                                                                                                                                                                                                                                                                                                                                             |                                                                                                                                                                                                                                                                                                                                                                                                                                                                                                         | -                             | -                            | P_trifoliata_00858_mRNA_8,1     |
| GF005000 | 0                          | 0                         | 0                            | 1 MadR family transposase isoform 1 (1)                  | zinc ion binding [GO:0008270]<br>molecular_function (1)                                                                                                                                                                                                                                                                                                                                                                                                                                                                                                     | Transposase, MadR, plant [IPR004332] (1); Zinc finger, SWIM-type [IPR007527] (1)                                                                                                                                                                                                                                                                                                                                                                                                                        | -                             | -                            | P_trifoliata_00858_mRNA_6,1     |
| GF005000 | 0                          | 0                         | 0                            | 1 Hypothetical protein (1)                               |                                                                                                                                                                                                                                                                                                                                                                                                                                                                                                                                                             |                                                                                                                                                                                                                                                                                                                                                                                                                                                                                                         | -                             | -                            | P_trifoliata_00858_mRNA_4,1     |
| GF005000 | 0                          | 0                         | 0                            | 1 Hypothetical protein (1)                               |                                                                                                                                                                                                                                                                                                                                                                                                                                                                                                                                                             |                                                                                                                                                                                                                                                                                                                                                                                                                                                                                                         | -                             | -                            | P_trifoliata_00858_mRNA_3,1     |
| GF005000 | 0                          | 0                         | 0                            | 1 Hypothetical protein (1)                               | sucrose metabolic process [GO:0005985]<br>biological_process (1); sucrose synthase activity [GO:0016157]<br>molecular_function (1)                                                                                                                                                                                                                                                                                                                                                                                                                          | Sucrose synthase [IPR000368] (1)                                                                                                                                                                                                                                                                                                                                                                                                                                                                        | -                             | -                            | P_trifoliata_00858_mRNA_12,1    |
| GF005000 | 0                          | 0                         | 0                            | 1 Pectinesterase 1 (1)                                   | pectinesterase activity [GO:0030599]<br>molecular_function (1); cell wall modification [GO:0042545]<br>biological_process (1); cell wall [GO:0005618]<br>cellular_component (1)                                                                                                                                                                                                                                                                                                                                                                             | Pectin lyase fold [IPR012334] (1); Pectinesterase, catalytic [IPR000070] (1); Pectin lyase fold/virulence factor [IPR011050] (1)                                                                                                                                                                                                                                                                                                                                                                        | -                             | -                            | P_trifoliata_00858_mRNA_11,1    |
| GF005000 | 0                          | 0                         | 0                            | 1 Hypothetical protein (1)                               |                                                                                                                                                                                                                                                                                                                                                                                                                                                                                                                                                             |                                                                                                                                                                                                                                                                                                                                                                                                                                                                                                         | -                             | -                            | P_trifoliata_00857_mRNA_2,1     |
| GF005000 | 0                          | 0                         | 0                            | 1 Hypothetical protein (1)                               |                                                                                                                                                                                                                                                                                                                                                                                                                                                                                                                                                             |                                                                                                                                                                                                                                                                                                                                                                                                                                                                                                         | -                             | -                            | P_trifoliata_00857_mRNA_1,1     |
| GF005000 | 0                          | 0                         | 0                            | 1 Hypothetical protein (1)                               |                                                                                                                                                                                                                                                                                                                                                                                                                                                                                                                                                             |                                                                                                                                                                                                                                                                                                                                                                                                                                                                                                         | -                             | -                            | P_trifoliata_00856_mRNA_5,1     |
| GF005000 | 0                          | 0                         | 0                            | 1 D-mannose binding lectin family protein, expressed (1) | protein binding [GO:0005515]<br>molecular_function (1); recognition of pollex [GO:0048554]<br>biological_process (1)                                                                                                                                                                                                                                                                                                                                                                                                                                        | MATH/TRAF domain [IPR002083] (1); TRAF-like [IPR008974] (1)<br>Domain of unknown function DUF4283 [IPR025558] (1)<br>Bull-type lectin domain [IPR01480] (1); S-locus glycoprotein domain [IPR008551] (1); EGF-like domain [IPR000742] (1)                                                                                                                                                                                                                                                               | -                             | -                            | P_trifoliata_00856_mRNA_4,1     |
| GF005000 | 0                          | 0                         | 0                            | 1 Hypothetical protein (1)                               |                                                                                                                                                                                                                                                                                                                                                                                                                                                                                                                                                             |                                                                                                                                                                                                                                                                                                                                                                                                                                                                                                         | -                             | -                            | P_trifoliata_00856_mRNA_3,1     |
| GF005000 | 0                          | 0                         | 0                            | 1 Hypothetical protein (1)                               | protein binding [GO:0005515]<br>molecular_function (1)                                                                                                                                                                                                                                                                                                                                                                                                                                                                                                      | Reverse transcriptase, RNA-dependent DNA polymerase [IPR013103] (1); Leucine-rich repeat domain, L domain-like [IPR032675] (1); Leucine-rich repeat [IPR016111] (1)                                                                                                                                                                                                                                                                                                                                     | -                             | -                            | P_trifoliata_00855_mRNA_8,1     |
| GF005000 | 0                          | 0                         | 0                            | 1 Adenylate dimethylallyltransferase (1)                 | prenyltransferase activity [GO:0004659]<br>molecular_function (1); integral component of membrane [GO:0016021]<br>cellular_component (1)                                                                                                                                                                                                                                                                                                                                                                                                                    | UbaA prenyltransferase family [IPR000537] (1)                                                                                                                                                                                                                                                                                                                                                                                                                                                           | -                             | -                            | P_trifoliata_00855_mRNA_4,1     |
| GF005000 | 0                          | 0                         | 0                            | 1 Zinc finger containing protein, putative (1)           | zinc ion binding [GO:0008270]<br>molecular_function (1)                                                                                                                                                                                                                                                                                                                                                                                                                                                                                                     | Zinc finger, SWIM-type [IPR007527] (1); Zinc finger, PMZ-type [IPR006564] (1)                                                                                                                                                                                                                                                                                                                                                                                                                           | -                             | -                            | P_trifoliata_00854_mRNA_9,1     |
| GF005000 | 0                          | 0                         | 0                            | 1 Hypothetical protein (1)                               | nucleic acid binding [GO:0003676]<br>molecular_function (1); zinc ion binding [GO:0008270]<br>molecular_function (1)                                                                                                                                                                                                                                                                                                                                                                                                                                        | Zinc finger, CCHC-type [IPR001878] (1)                                                                                                                                                                                                                                                                                                                                                                                                                                                                  | -                             | -                            | P_trifoliata_00854_mRNA_7,1     |
| GF005000 | 0                          | 0                         | 0                            | 1 Hypothetical protein (1)                               |                                                                                                                                                                                                                                                                                                                                                                                                                                                                                                                                                             |                                                                                                                                                                                                                                                                                                                                                                                                                                                                                                         | -                             | -                            | P_trifoliata_00854_mRNA_3,1     |
| GF005000 | 0                          | 0                         | 0                            | 1 Hypothetical protein (1)                               |                                                                                                                                                                                                                                                                                                                                                                                                                                                                                                                                                             |                                                                                                                                                                                                                                                                                                                                                                                                                                                                                                         | -                             | -                            | P_trifoliata_00854_mRNA_11,1    |
| GF005000 | 0                          | 0                         | 0                            | 1 Hypothetical protein (1)                               |                                                                                                                                                                                                                                                                                                                                                                                                                                                                                                                                                             |                                                                                                                                                                                                                                                                                                                                                                                                                                                                                                         | -                             | -                            | P_trifoliata_00853_mRNA_9,1     |
| GF005000 | 0                          | 0                         | 0                            | 1 Hypothetical protein (1)                               |                                                                                                                                                                                                                                                                                                                                                                                                                                                                                                                                                             | Transposon, En/Spm-like [IPR004242] (1)                                                                                                                                                                                                                                                                                                                                                                                                                                                                 | -                             | -                            | P_trifoliata_00853_mRNA_7,1     |
| GF005000 | 0                          | 0                         | 0                            | 1 Hypothetical protein (1)                               |                                                                                                                                                                                                                                                                                                                                                                                                                                                                                                                                                             |                                                                                                                                                                                                                                                                                                                                                                                                                                                                                                         | -                             | -                            | P_trifoliata_00853_mRNA_3,1     |
| GF005000 | 0                          | 0                         | 0                            | 1 Hypothetical protein (1)                               |                                                                                                                                                                                                                                                                                                                                                                                                                                                                                                                                                             | Domain of unknown function DUF4371 [IPR025388] (1)<br>Galactose oxidase, beta-propeller [IPR015916] (1); Glyoxal oxidase, N-terminal [IPR009880] (1); Galactose oxidase/kech, beta-propeller [IPR011043] (1)                                                                                                                                                                                                                                                                                            | -                             | -                            | P_trifoliata_00853_mRNA_1,1     |
| GF005000 | 0                          | 0                         | 0                            | 1 LBR receptor-like kinase family protein (1)            | photosynthetic electron transport in photosystem II [GO:0009772]<br>biological_process (1); electron transporter, transferring electrons within the cyclic electron transport pathway of photosynthesis activity [GO:0045156]<br>molecular_function (1); protein binding [GO:0005515]<br>molecular_function (1); protein binding [GO:0019884]<br>biological_process (1); protein kinase activity [GO:0004672]<br>molecular_function (1); protein phosphorylation [GO:0006468]<br>biological_process (1); ATP binding [GO:0005524]<br>molecular_function (1) | Protein kinase domain [IPR000719] (1); Photosynthetic reaction centre, LM [IPR000484] (1); Concanavalin A-like lectin/galactanase domain [IPR013320] (1); Leucine-rich repeat domain, L domain-like [IPR032675] (1); Protein kinase-like domain [IPR011009] (1); Serine/threonine/dual specificity protein kinase, catalytic domain [IPR00290] (1); Protein kinase, ATP binding site [IPR017441] (1); Serine/threonine-protein kinase, active site [IPR008271] (1); Leucine-rich repeat [IPR016111] (1) | -                             | -                            | P_trifoliata_00852_mRNA_6,1     |
| GF005000 | 0                          | 0                         | 0                            | 1 Hypothetical protein (1)                               |                                                                                                                                                                                                                                                                                                                                                                                                                                                                                                                                                             |                                                                                                                                                                                                                                                                                                                                                                                                                                                                                                         | -                             | -                            | P_trifoliata_00852_mRNA_5,1     |
| GF005000 | 0                          | 0                         | 0                            | 1 Hypothetical protein (1)                               | nucleic acid binding [GO:0003676]<br>molecular_function (1)                                                                                                                                                                                                                                                                                                                                                                                                                                                                                                 | Ribonuclease H-like domain [IPR012337] (1)                                                                                                                                                                                                                                                                                                                                                                                                                                                              | -                             | -                            | P_trifoliata_00852_mRNA_4,1     |
| GF005000 | 0                          | 0                         | 0                            | 1 Hypothetical protein (1)                               |                                                                                                                                                                                                                                                                                                                                                                                                                                                                                                                                                             | Zinc knuckle CX2CX4HX4C [IPR025836] (1)                                                                                                                                                                                                                                                                                                                                                                                                                                                                 | -                             | -                            | P_trifoliata_00851_mRNA_6,1     |
| GF005000 | 0                          | 0                         | 0                            | 1 Truncated non-smoky glycosyltransferase 1 (1)          | metabolic process [GO:0008152]<br>biological_process (1); transferase activity, transferring hexosyl groups [GO:0016758]<br>molecular_function (1)                                                                                                                                                                                                                                                                                                                                                                                                          | UDP-glucuronosyl/UDP-glucosyltransferase [IPR002213] (1)                                                                                                                                                                                                                                                                                                                                                                                                                                                | -                             | -                            | P_trifoliata_00851_mRNA_4,1     |
| GF005000 | 0                          | 0                         | 0                            | 1 Hypothetical protein (1)                               |                                                                                                                                                                                                                                                                                                                                                                                                                                                                                                                                                             |                                                                                                                                                                                                                                                                                                                                                                                                                                                                                                         | -                             | -                            | P_trifoliata_00851_mRNA_3,1     |
| GF005000 | 0                          | 0                         | 0                            | 1 Hypothetical protein (1)                               |                                                                                                                                                                                                                                                                                                                                                                                                                                                                                                                                                             |                                                                                                                                                                                                                                                                                                                                                                                                                                                                                                         | -                             | -                            | P_trifoliata_00851_mRNA_2,1     |
| GF005000 | 0                          | 0                         | 0                            | 1 Hypothetical protein (1)                               |                                                                                                                                                                                                                                                                                                                                                                                                                                                                                                                                                             |                                                                                                                                                                                                                                                                                                                                                                                                                                                                                                         | -                             | -                            | P_trifoliata_00851_mRNA_1,1     |
| GF005000 | 0                          | 0                         | 0                            | 1 Hypothetical protein (1)                               |                                                                                                                                                                                                                                                                                                                                                                                                                                                                                                                                                             |                                                                                                                                                                                                                                                                                                                                                                                                                                                                                                         | -                             | -                            | P_trifoliata_00850_mRNA_5,1     |
| GF005000 | 0                          | 0                         | 0                            | 1 Hypothetical protein (1)                               |                                                                                                                                                                                                                                                                                                                                                                                                                                                                                                                                                             |                                                                                                                                                                                                                                                                                                                                                                                                                                                                                                         | -                             | -                            | P_trifoliata_00849_mRNA_9,1     |
| GF005000 | 0                          | 0                         | 0                            | 1 Hypothetical protein (1)                               |                                                                                                                                                                                                                                                                                                                                                                                                                                                                                                                                                             |                                                                                                                                                                                                                                                                                                                                                                                                                                                                                                         | -                             | -                            | P_trifoliata_00849_mRNA_8,1     |
| GF005000 | 0                          | 0                         | 0                            | 1 Hypothetical protein (1)                               |                                                                                                                                                                                                                                                                                                                                                                                                                                                                                                                                                             |                                                                                                                                                                                                                                                                                                                                                                                                                                                                                                         | -                             | -                            | P_trifoliata_00849_mRNA_7,1     |
| GF005000 | 0                          | 0                         | 0                            | 1 Retrotransposable element t2 kDa protein type 1 (1)    |                                                                                                                                                                                                                                                                                                                                                                                                                                                                                                                                                             |                                                                                                                                                                                                                                                                                                                                                                                                                                                                                                         | -                             | -                            | P_trifoliata_00849_mRNA_5,1     |
| GF005000 | 0                          | 0                         | 0                            | 1 Hypothetical protein (1)                               |                                                                                                                                                                                                                                                                                                                                                                                                                                                                                                                                                             |                                                                                                                                                                                                                                                                                                                                                                                                                                                                                                         | -                             | -                            | P_trifoliata_00849_mRNA_1,1     |
| GF005000 | 0                          | 0                         | 0                            | 1 Pyruvate kinase (1)                                    | glycolytic process [GO:0006096]<br>biological_process (1); pyruvate kinase activity [GO:0004743]<br>molecular_function (1); potassium ion binding [GO:0003055]<br>molecular_function (1); catalytic activity [GO:0003824]<br>molecular_function (1); magnesium ion binding [GO:0000287]<br>molecular_function (1)                                                                                                                                                                                                                                           | Pyruvate/Phosphoenolpyruvate kinase-like domain [IPR015813] (1); Pyruvate kinase-like, insert domain [IPR011037] (1); Pyruvate kinase [IPR001097] (1); Pyruvate kinase, beta-barrel insert domain [IPR018806] (1); Pyruvate kinase, barrel [IPR015793] (1)                                                                                                                                                                                                                                              | -                             | -                            | P_trifoliata_00848_mRNA_5,1     |
| GF005000 | 0                          | 0                         | 0                            | 1 Hypothetical protein (1)                               |                                                                                                                                                                                                                                                                                                                                                                                                                                                                                                                                                             |                                                                                                                                                                                                                                                                                                                                                                                                                                                                                                         | -                             | -                            | P_trifoliata_00848_mRNA_3,1     |
| GF005000 | 0                          | 0                         | 0                            | 1 Hypothetical protein (1)                               |                                                                                                                                                                                                                                                                                                                                                                                                                                                                                                                                                             |                                                                                                                                                                                                                                                                                                                                                                                                                                                                                                         | -                             | -                            | P_trifoliata_00848_mRNA_2,1     |
| GF005000 | 0                          | 0                         | 0                            | 1 Hypothetical protein (1)                               |                                                                                                                                                                                                                                                                                                                                                                                                                                                                                                                                                             |                                                                                                                                                                                                                                                                                                                                                                                                                                                                                                         | -                             | -                            | P_trifoliata_00848_mRNA_1,1     |
| GF005000 | 0                          | 0                         | 0                            | 1 Hypothetical protein (1)                               |                                                                                                                                                                                                                                                                                                                                                                                                                                                                                                                                                             |                                                                                                                                                                                                                                                                                                                                                                                                                                                                                                         | -                             | -                            | P_trifoliata_00847_mRNA_3,1     |

| ID        | Num. in <i>C. clementiae</i> | Num. in <i>C. canihii</i> | Num. in <i>P. trifoliata</i> | Note                                           | GO                                                                                                                                                                                                                                                                                                                | InterPro                                                                                                                                                                                          | Members in <i>C. clementiae</i> | Members in <i>C. canihii</i> | Members in <i>P. trifoliata</i> |
|-----------|------------------------------|---------------------------|------------------------------|------------------------------------------------|-------------------------------------------------------------------------------------------------------------------------------------------------------------------------------------------------------------------------------------------------------------------------------------------------------------------|---------------------------------------------------------------------------------------------------------------------------------------------------------------------------------------------------|---------------------------------|------------------------------|---------------------------------|
| GF005088  | 0                            | 0                         | 1                            | Hypothetical protein (1)                       |                                                                                                                                                                                                                                                                                                                   |                                                                                                                                                                                                   | -                               | -                            | P_trifoliata_00847_miRNA_1,1    |
| GF005087  | 0                            | 0                         | 1                            | Hypothetical protein (1)                       |                                                                                                                                                                                                                                                                                                                   |                                                                                                                                                                                                   | -                               | -                            | P_trifoliata_00846_miRNA_9,1    |
| GF005086  | 0                            | 0                         | 1                            | Hypothetical protein (1)                       |                                                                                                                                                                                                                                                                                                                   |                                                                                                                                                                                                   | -                               | -                            | P_trifoliata_00846_miRNA_8,1    |
| GF005085  | 0                            | 0                         | 1                            | Hypothetical protein (1)                       |                                                                                                                                                                                                                                                                                                                   |                                                                                                                                                                                                   | -                               | -                            | P_trifoliata_00846_miRNA_5,1    |
| GF005084  | 0                            | 0                         | 1                            | Hypothetical protein (1)                       |                                                                                                                                                                                                                                                                                                                   |                                                                                                                                                                                                   | -                               | -                            | P_trifoliata_00846_miRNA_4,1    |
| GF005083  | 0                            | 0                         | 1                            | Hypothetical protein (1)                       |                                                                                                                                                                                                                                                                                                                   |                                                                                                                                                                                                   | -                               | -                            | P_trifoliata_00846_miRNA_3,1    |
| GF005082  | 0                            | 0                         | 1                            | Hypothetical protein (1)                       |                                                                                                                                                                                                                                                                                                                   |                                                                                                                                                                                                   | -                               | -                            | P_trifoliata_00845_miRNA_9,1    |
| GF005081  | 0                            | 0                         | 1                            | Hypothetical protein (1)                       |                                                                                                                                                                                                                                                                                                                   |                                                                                                                                                                                                   | -                               | -                            | P_trifoliata_00845_miRNA_7,1    |
| GF005080  | 0                            | 0                         | 1                            | Hypothetical protein (1)                       | catalytic activity [GO:0003824 molecular_function] (1)                                                                                                                                                                                                                                                            | Aromatic amino acid lyase [IPR001106] (1); Fumarate/histidase, N-terminal [IPR024083] (1); L-Aspartase-like [IPR008948] (1)                                                                       | -                               | -                            | P_trifoliata_00845_miRNA_6,1    |
| GF005089  | 0                            | 0                         | 1                            | Hypothetical protein (1)                       |                                                                                                                                                                                                                                                                                                                   |                                                                                                                                                                                                   | -                               | -                            | P_trifoliata_00845_miRNA_5,1    |
| GF005088  | 0                            | 0                         | 1                            | Hypothetical protein (1)                       |                                                                                                                                                                                                                                                                                                                   | Mitochondrial inner membrane protein Mitofillin [IPR019133] (1)                                                                                                                                   | -                               | -                            | P_trifoliata_00845_miRNA_4,1    |
| GF005087  | 0                            | 0                         | 1                            | Hypothetical protein (1)                       | binding [GO:0005488 molecular_function] (1)                                                                                                                                                                                                                                                                       | Armadillo-type fold [IPR016024] (1)                                                                                                                                                               | -                               | -                            | P_trifoliata_00845_miRNA_3,1    |
| GF005086  | 0                            | 0                         | 1                            | Hypothetical protein (1)                       | binding [GO:0005488 molecular_function] (1)                                                                                                                                                                                                                                                                       | Armadillo-type fold [IPR016024] (1); Armadillo-like helical [IPR011989] (1)                                                                                                                       | -                               | -                            | P_trifoliata_00845_miRNA_2,1    |
| GF005085  | 0                            | 0                         | 1                            | Hypothetical protein (1)                       |                                                                                                                                                                                                                                                                                                                   |                                                                                                                                                                                                   | -                               | -                            | P_trifoliata_00845_miRNA_12,1   |
| GF005084  | 0                            | 0                         | 1                            | Hypothetical protein (1)                       |                                                                                                                                                                                                                                                                                                                   |                                                                                                                                                                                                   | -                               | -                            | P_trifoliata_00845_miRNA_10,1   |
| GF005083  | 0                            | 0                         | 1                            | Hypothetical protein (1)                       | binding [GO:0005488 molecular_function] (1); protein binding [GO:0005515 molecular_function] (1)                                                                                                                                                                                                                  | Armadillo-type fold [IPR016024] (1); C2 domain [IPR000008] (1); Armadillo [IPR000225] (1); Armadillo-like helical [IPR011989] (1)                                                                 | -                               | -                            | P_trifoliata_00845_miRNA_1,1    |
| GF005082  | 0                            | 0                         | 1                            | Hypothetical protein (1)                       |                                                                                                                                                                                                                                                                                                                   |                                                                                                                                                                                                   | -                               | -                            | P_trifoliata_00844_miRNA_5,1    |
| GF005081  | 0                            | 0                         | 1                            | Hypothetical protein (1)                       |                                                                                                                                                                                                                                                                                                                   |                                                                                                                                                                                                   | -                               | -                            | P_trifoliata_00844_miRNA_3,1    |
| GF005080  | 0                            | 0                         | 1                            | Hypothetical protein (1)                       |                                                                                                                                                                                                                                                                                                                   |                                                                                                                                                                                                   | -                               | -                            | P_trifoliata_00844_miRNA_1,1    |
| GF0050839 | 0                            | 0                         | 1                            | Hypothetical protein (1)                       | nucleic acid binding [GO:0003676 molecular_function] (1); amino acid transmembrane transporter activity [GO:0015171 molecular_function] (1); amino acid transmembrane transport [GO:0003333 biological_process] (1); membrane [GO:0016020 cellular_component] (1)                                                 | Amino acid/polyamine transporter I [IPR00293] (1); Reverse transcriptase zinc-binding domain [IPR025960] (1); Ribonuclease-H-like domain [IPR012337] (1)                                          | -                               | -                            | P_trifoliata_00843_miRNA_5,1    |
| GF0050838 | 0                            | 0                         | 1                            | Hypothetical protein (1)                       |                                                                                                                                                                                                                                                                                                                   |                                                                                                                                                                                                   | -                               | -                            | P_trifoliata_00842_miRNA_2,1    |
| GF0050837 | 0                            | 0                         | 1                            | Hypothetical protein (1)                       | protein binding [GO:0005515 molecular_function] (1)                                                                                                                                                                                                                                                               | F-box domain [IPR01810] (1)                                                                                                                                                                       | -                               | -                            | P_trifoliata_00842_miRNA_13,1   |
| GF0050836 | 0                            | 0                         | 1                            | 3(2),5'-bisphosphate nucleotidase (1)          | phosphatidylinositol phosphorylation [GO:0046854 biological_process] (1); sulfur compound metabolic process [GO:0006790 biological_process] (1); 3(2),5'-bisphosphate nucleotidase activity [GO:0008441 molecular_function] (1)                                                                                   | Inositol monophosphatase, metal-binding site [IPR025831] (1); 3(2),5'-bisphosphate nucleotidase-HAL2 [IPR006239] (1); Inositol monophosphatase [IPR000760] (1)                                    | -                               | -                            | P_trifoliata_00842_miRNA_1,1    |
| GF0050835 | 0                            | 0                         | 1                            | Hypothetical protein (1)                       |                                                                                                                                                                                                                                                                                                                   |                                                                                                                                                                                                   | -                               | -                            | P_trifoliata_00841_miRNA_8,1    |
| GF0050834 | 0                            | 0                         | 1                            | Hypothetical protein (1)                       |                                                                                                                                                                                                                                                                                                                   |                                                                                                                                                                                                   | -                               | -                            | P_trifoliata_00841_miRNA_7,1    |
| GF0050833 | 0                            | 0                         | 1                            | Hypothetical protein (1)                       |                                                                                                                                                                                                                                                                                                                   |                                                                                                                                                                                                   | -                               | -                            | P_trifoliata_00841_miRNA_5,1    |
| GF0050832 | 0                            | 0                         | 1                            | Hypothetical protein (1)                       |                                                                                                                                                                                                                                                                                                                   |                                                                                                                                                                                                   | -                               | -                            | P_trifoliata_00841_miRNA_3,1    |
| GF0050831 | 0                            | 0                         | 1                            | Hypothetical protein (1)                       |                                                                                                                                                                                                                                                                                                                   |                                                                                                                                                                                                   | -                               | -                            | P_trifoliata_00840_miRNA_4,1    |
| GF0050830 | 0                            | 0                         | 1                            | Hypothetical protein (1)                       |                                                                                                                                                                                                                                                                                                                   |                                                                                                                                                                                                   | -                               | -                            | P_trifoliata_00840_miRNA_10,1   |
| GF0050829 | 0                            | 0                         | 1                            | Hypothetical protein (1)                       |                                                                                                                                                                                                                                                                                                                   |                                                                                                                                                                                                   | -                               | -                            | P_trifoliata_00840_miRNA_1,1    |
| GF0050828 | 0                            | 0                         | 1                            | Hypothetical protein (1)                       |                                                                                                                                                                                                                                                                                                                   |                                                                                                                                                                                                   | -                               | -                            | P_trifoliata_00839_miRNA_9,1    |
| GF0050827 | 0                            | 0                         | 1                            | Hypothetical protein (1)                       |                                                                                                                                                                                                                                                                                                                   |                                                                                                                                                                                                   | -                               | -                            | P_trifoliata_00839_miRNA_7,1    |
| GF0050826 | 0                            | 0                         | 1                            | Hypothetical protein (1)                       |                                                                                                                                                                                                                                                                                                                   |                                                                                                                                                                                                   | -                               | -                            | P_trifoliata_00839_miRNA_6,1    |
| GF0050825 | 0                            | 0                         | 1                            | Hypothetical protein (1)                       |                                                                                                                                                                                                                                                                                                                   |                                                                                                                                                                                                   | -                               | -                            | P_trifoliata_00839_miRNA_5,1    |
| GF0050824 | 0                            | 0                         | 1                            | Hypothetical protein (1)                       |                                                                                                                                                                                                                                                                                                                   |                                                                                                                                                                                                   | -                               | -                            | P_trifoliata_00839_miRNA_11,1   |
| GF0050823 | 0                            | 0                         | 1                            | Hypothetical protein (1)                       |                                                                                                                                                                                                                                                                                                                   |                                                                                                                                                                                                   | -                               | -                            | P_trifoliata_00838_miRNA_9,1    |
| GF0050822 | 0                            | 0                         | 1                            | Hypothetical protein (1)                       |                                                                                                                                                                                                                                                                                                                   |                                                                                                                                                                                                   | -                               | -                            | P_trifoliata_00838_miRNA_8,1    |
| GF0050821 | 0                            | 0                         | 1                            | Hypothetical protein (1)                       | regulation of transcription, DNA-templated [GO:0006355 biological_process] (1)                                                                                                                                                                                                                                    | FAR1 DNA binding domain [IPR004330] (1); FHY3/FAR1 family [IPR01052] (1)                                                                                                                          | -                               | -                            | P_trifoliata_00838_miRNA_7,1    |
| GF0050820 | 0                            | 0                         | 1                            | Hypothetical protein (1)                       | proteolysis [GO:0006508 biological_process] (1); cysteine-type peptidase activity [GO:0008234 molecular_function] (1)                                                                                                                                                                                             | Upl1 protease family, C-terminal catalytic domain [IPR003653] (1)                                                                                                                                 | -                               | -                            | P_trifoliata_00838_miRNA_6,1    |
| GF0050819 | 0                            | 0                         | 1                            | Hypothetical protein (1)                       |                                                                                                                                                                                                                                                                                                                   |                                                                                                                                                                                                   | -                               | -                            | P_trifoliata_00838_miRNA_4,1    |
| GF0050818 | 0                            | 0                         | 1                            | Cytochrome P450 76AD1-like protein (1)         | oxidoreductase activity, acting on paired donors, with incorporation or reduction of molecular oxygen [GO:0016705 molecular_function] (1); oxidation-reduction process [GO:005114 biological_process] (1); heme binding [GO:0020037 molecular_function] (1); iron ion binding [GO:0005506 molecular_function] (1) | Cytochrome P450 [IPR01128] (1); Transposase, MuDR, plant [IPR004332] (1); Cytochrome P450, F-class, group I [IPR02401] (1)                                                                        | -                               | -                            | P_trifoliata_00838_miRNA_3,1    |
| GF0050817 | 0                            | 0                         | 1                            | Hypothetical protein (1)                       | ADP binding [GO:0043531 molecular_function] (1)                                                                                                                                                                                                                                                                   | NB-ARC [IPR002182] (1); P-loop containing nucleoside triphosphate hydrolase [IPR027417] (1)                                                                                                       | -                               | -                            | P_trifoliata_00838_miRNA_12,1   |
| GF0050816 | 0                            | 0                         | 1                            | Hypothetical protein (1)                       |                                                                                                                                                                                                                                                                                                                   |                                                                                                                                                                                                   | -                               | -                            | P_trifoliata_00838_miRNA_10,1   |
| GF0050815 | 0                            | 0                         | 1                            | Hypothetical protein (1)                       |                                                                                                                                                                                                                                                                                                                   |                                                                                                                                                                                                   | -                               | -                            | P_trifoliata_00837_miRNA_9,1    |
| GF0050814 | 0                            | 0                         | 1                            | NAC domain-containing protein 7 (1)            | regulation of transcription, DNA-templated [GO:0006355 biological_process] (1); DNA binding [GO:0003677 molecular_function] (1)                                                                                                                                                                                   | NAC domain [IPR003441] (1)                                                                                                                                                                        | -                               | -                            | P_trifoliata_00837_miRNA_7,1    |
| GF0050813 | 0                            | 0                         | 1                            | Hypothetical protein (1)                       |                                                                                                                                                                                                                                                                                                                   |                                                                                                                                                                                                   | -                               | -                            | P_trifoliata_00837_miRNA_4,1    |
| GF0050812 | 0                            | 0                         | 1                            | Hypothetical protein (1)                       |                                                                                                                                                                                                                                                                                                                   |                                                                                                                                                                                                   | -                               | -                            | P_trifoliata_00837_miRNA_3,1    |
| GF0050811 | 0                            | 0                         | 1                            | Hypothetical protein (1)                       |                                                                                                                                                                                                                                                                                                                   |                                                                                                                                                                                                   | -                               | -                            | P_trifoliata_00837_miRNA_2,1    |
| GF0050810 | 0                            | 0                         | 1                            | Hypothetical protein (1)                       |                                                                                                                                                                                                                                                                                                                   |                                                                                                                                                                                                   | -                               | -                            | P_trifoliata_00837_miRNA_1,1    |
| GF0050809 | 0                            | 0                         | 1                            | Hypothetical protein (1)                       |                                                                                                                                                                                                                                                                                                                   |                                                                                                                                                                                                   | -                               | -                            | P_trifoliata_00835_miRNA_4,1    |
| GF0050808 | 0                            | 0                         | 1                            | Positive Athalia retroelement ORF1 protein (1) |                                                                                                                                                                                                                                                                                                                   | Retransposon gag domain [IPR005162] (1)                                                                                                                                                           | -                               | -                            | P_trifoliata_00835_miRNA_2,1    |
| GF0050807 | 0                            | 0                         | 1                            | Hypothetical protein (1)                       |                                                                                                                                                                                                                                                                                                                   |                                                                                                                                                                                                   | -                               | -                            | P_trifoliata_00835_miRNA_14,1   |
| GF0050806 | 0                            | 0                         | 1                            | Hypothetical protein (1)                       |                                                                                                                                                                                                                                                                                                                   |                                                                                                                                                                                                   | -                               | -                            | P_trifoliata_00835_miRNA_13,1   |
| GF0050805 | 0                            | 0                         | 1                            | Hypothetical protein (1)                       | membrane [GO:0016020 cellular_component] (1); transport [GO:0006810 biological_process] (1); transporter activity [GO:0005215 molecular_function] (1); oligopeptide transporter [GO:0000657 biological_process] (1)                                                                                               | PTR2 family proton/oligopeptide symporter, conserved site [IPR018456] (1); Proton-dependent oligopeptide transporter family [IPR001091] (1); Major facilitator superfamily domain [IPR020846] (1) | -                               | -                            | P_trifoliata_00834_miRNA_8,1    |
| GF0050804 | 0                            | 0                         | 1                            | Hypothetical protein (1)                       | regulation of transcription, DNA-templated [GO:0006355 biological_process] (1)                                                                                                                                                                                                                                    | FHY3/FAR1 family [IPR01052] (1); MULE transposase domain [IPR018289] (1)                                                                                                                          | -                               | -                            | P_trifoliata_00834_miRNA_6,1    |
| GF0050803 | 0                            | 0                         | 1                            | Hypothetical protein (1)                       |                                                                                                                                                                                                                                                                                                                   |                                                                                                                                                                                                   | -                               | -                            | P_trifoliata_00833_miRNA_2,1    |
| GF0050802 | 0                            | 0                         | 1                            | Hypothetical protein (1)                       | protein binding [GO:0005515 molecular_function] (1)                                                                                                                                                                                                                                                               | Leucine-rich repeat domain, L domain-like [IPR032675] (1); Leucine-rich repeat [IPR01611] (1)                                                                                                     | -                               | -                            | P_trifoliata_00832_miRNA_9,1    |
| GF0050801 | 0                            | 0                         | 1                            | Hypothetical protein (1)                       |                                                                                                                                                                                                                                                                                                                   |                                                                                                                                                                                                   | -                               | -                            | P_trifoliata_00832_miRNA_4,1    |
| GF0050800 | 0                            | 0                         | 1                            | Hypothetical protein (1)                       |                                                                                                                                                                                                                                                                                                                   | Transposase, MuDR, plant [IPR004332] (1)                                                                                                                                                          | -                               | -                            | P_trifoliata_00831_miRNA_7,1    |
| GF0050799 | 0                            | 0                         | 1                            | Hypothetical protein (1)                       |                                                                                                                                                                                                                                                                                                                   |                                                                                                                                                                                                   | -                               | -                            | P_trifoliata_00831_miRNA_6,1    |
| GF0050798 | 0                            | 0                         | 1                            | Ubiquitin carboxyl-terminal hydrolase 12 (1)   | protein binding [GO:0005515 molecular_function] (1)                                                                                                                                                                                                                                                               | MATH1/TRAF domain [IPR020883] (1); TRAF-like [IPR008974] (1)                                                                                                                                      | -                               | -                            | P_trifoliata_00831_miRNA_3,1    |
| GF0050797 | 0                            | 0                         | 1                            | Ubiquitin carboxyl-terminal hydrolase 12 (1)   | protein binding [GO:0005515 molecular_function] (1)                                                                                                                                                                                                                                                               | TRAF-1-like [IPR008974] (1); MATH1/TRAF domain [IPR020883] (1)                                                                                                                                    | -                               | -                            | P_trifoliata_00831_miRNA_2,1    |
| GF0050796 | 0                            | 0                         | 1                            | Hypothetical protein (1)                       |                                                                                                                                                                                                                                                                                                                   |                                                                                                                                                                                                   | -                               | -                            | P_trifoliata_00830_miRNA_9,1    |
| GF0050795 | 0                            | 0                         | 1                            | Hypothetical protein (1)                       |                                                                                                                                                                                                                                                                                                                   |                                                                                                                                                                                                   | -                               | -                            | P_trifoliata_00830_miRNA_7,1    |
| GF0050794 | 0                            | 0                         | 1                            | Hypothetical protein (1)                       |                                                                                                                                                                                                                                                                                                                   |                                                                                                                                                                                                   | -                               | -                            | P_trifoliata_00830_miRNA_6,1    |
| GF0050793 | 0                            | 0                         | 1                            | Hypothetical protein (1)                       |                                                                                                                                                                                                                                                                                                                   |                                                                                                                                                                                                   | -                               | -                            | P_trifoliata_00830_miRNA_4,1    |
| GF0050792 | 0                            | 0                         | 1                            | Hypothetical protein (1)                       |                                                                                                                                                                                                                                                                                                                   |                                                                                                                                                                                                   | -                               | -                            | P_trifoliata_00830_miRNA_3,1    |
| GF0050791 | 0                            | 0                         | 1                            | Hypothetical protein (1)                       |                                                                                                                                                                                                                                                                                                                   |                                                                                                                                                                                                   | -                               | -                            | P_trifoliata_00830_miRNA_12,1   |
| GF0050790 | 0                            | 0                         | 1                            | Hypothetical protein (1)                       |                                                                                                                                                                                                                                                                                                                   |                                                                                                                                                                                                   | -                               | -                            | P_trifoliata_00830_miRNA_11,1   |
| GF0050789 | 0                            | 0                         | 1                            | Hypothetical protein (1)                       |                                                                                                                                                                                                                                                                                                                   |                                                                                                                                                                                                   | -                               | -                            | P_trifoliata_00830_miRNA_1,1    |
| GF0050788 | 0                            | 0                         | 1                            | Isoaspartyl peptidase L-asparaginase (1)       | hydrolase activity [GO:0016787 molecular_function] (1)                                                                                                                                                                                                                                                            | Peptidase T2, asparaginase 2 [IPR006248] (1); Nucleophile aminohydrolases, N-terminal [IPR029055] (1)                                                                                             | -                               | -                            | P_trifoliata_00829_miRNA_4,1    |
| GF0050787 | 0                            | 0                         | 1                            | Hypothetical protein (1)                       | nucleic acid binding [GO:0003676 molecular_function] (1)                                                                                                                                                                                                                                                          | Ribonuclease-H-like domain [IPR012337] (1)                                                                                                                                                        | -                               | -                            | P_trifoliata_00829_miRNA_3,1    |
| GF0050786 | 0                            | 0                         | 1                            | Hypothetical protein (1)                       |                                                                                                                                                                                                                                                                                                                   |                                                                                                                                                                                                   | -                               | -                            | P_trifoliata_00829_miRNA_2,1    |
| GF0050785 | 0                            | 0                         | 1                            | Hypothetical protein (1)                       |                                                                                                                                                                                                                                                                                                                   |                                                                                                                                                                                                   | -                               | -                            | P_trifoliata_00829_miRNA_1,1    |
| GF0050784 | 0                            | 0                         | 1                            | Hypothetical protein (1)                       |                                                                                                                                                                                                                                                                                                                   |                                                                                                                                                                                                   | -                               | -                            | P_trifoliata_00828_miRNA_2,1    |
| GF0050783 | 0                            | 0                         | 1                            | Hypothetical protein (1)                       | protein kinase activity [GO:0004672 molecular_function] (1); protein phosphorylation [GO:0006468 biological_process] (1); ATP binding [GO:0005524 molecular_function] (1)                                                                                                                                         | Protein kinase-like domain [IPR011009] (1); Protein kinase domain [IPR000719] (1); Serine-threonine/tyrosine-protein kinase catalytic domain [IPR012455] (1)                                      | -                               | -                            | P_trifoliata_00827_miRNA_1,1    |
| GF0050782 | 0                            | 0                         | 1                            | Hypothetical protein (1)                       | zinc ion binding [GO:0008270 molecular_function] (1); nucleic acid binding [GO:0003676 molecular_function] (1)                                                                                                                                                                                                    | Zinc finger, CCHC-type [IPR001878] (1)                                                                                                                                                            | -                               | -                            | P_trifoliata_00826_miRNA_1,1    |

| ID        | Num. in <i>C. clementiae</i> | Num. in <i>C. canihii</i> | Num. in <i>P. trifoliata</i> | Note                                                        | GO                                                                                                                                                                                                                                                                                                                 | InterPro                                                                                                                                                                                                                      | Members in <i>C. clementiae</i> | Members in <i>C. canihii</i> | Members in <i>P. trifoliata</i> |
|-----------|------------------------------|---------------------------|------------------------------|-------------------------------------------------------------|--------------------------------------------------------------------------------------------------------------------------------------------------------------------------------------------------------------------------------------------------------------------------------------------------------------------|-------------------------------------------------------------------------------------------------------------------------------------------------------------------------------------------------------------------------------|---------------------------------|------------------------------|---------------------------------|
| GF0050781 | 0                            | 0                         | 0                            | 1 Hypothetical protein (1)                                  |                                                                                                                                                                                                                                                                                                                    |                                                                                                                                                                                                                               | -                               | -                            | P_trifoliata_00825_mRNA_9,1     |
| GF0050780 | 0                            | 0                         | 0                            | 1 Hypothetical protein (1)                                  |                                                                                                                                                                                                                                                                                                                    |                                                                                                                                                                                                                               | -                               | -                            | P_trifoliata_00825_mRNA_8,1     |
| GF0050779 | 0                            | 0                         | 0                            | 1 Hypothetical protein (1)                                  |                                                                                                                                                                                                                                                                                                                    |                                                                                                                                                                                                                               | -                               | -                            | P_trifoliata_00825_mRNA_6,1     |
| GF0050778 | 0                            | 0                         | 0                            | 1 Hypothetical protein (1)                                  |                                                                                                                                                                                                                                                                                                                    |                                                                                                                                                                                                                               | -                               | -                            | P_trifoliata_00825_mRNA_5,1     |
| GF0050777 | 0                            | 0                         | 0                            | 1 Hypothetical protein (1)                                  |                                                                                                                                                                                                                                                                                                                    | Viral movement protein [IPR028919] (1)                                                                                                                                                                                        | -                               | -                            | P_trifoliata_00825_mRNA_2,1     |
| GF0050776 | 0                            | 0                         | 0                            | 1 Peroxidase 4 (1)                                          | oxidation-reduction process [GO:0055114 biological_process] (1); peroxidase activity [GO:0004601 molecular_function] (1); response to oxidative stress [GO:0006979 biological_process] (1); heme binding [GO:0020037 molecular_function] (1)                                                                       | Haem peroxidase, plant/fungal/bacterial [IPR002016] (1); Plant peroxidase [IPR008023] (1); Peroxidase, active site [IPR019794] (1); Haem peroxidase [IPR010255] (1)                                                           | -                               | -                            | P_trifoliata_00825_mRNA_11,1    |
| GF0050775 | 0                            | 0                         | 0                            | 1 Hypothetical protein (1)                                  |                                                                                                                                                                                                                                                                                                                    |                                                                                                                                                                                                                               | -                               | -                            | P_trifoliata_00824_mRNA_8,1     |
| GF0050774 | 0                            | 0                         | 0                            | 1 CDNA clone:J023147812, full insert sequence (1)           |                                                                                                                                                                                                                                                                                                                    |                                                                                                                                                                                                                               | -                               | -                            | P_trifoliata_00824_mRNA_7,1     |
| GF0050773 | 0                            | 0                         | 0                            | 1 Hypothetical protein (1)                                  |                                                                                                                                                                                                                                                                                                                    |                                                                                                                                                                                                                               | -                               | -                            | P_trifoliata_00824_mRNA_3,1     |
| GF0050772 | 0                            | 0                         | 0                            | 1 Hypothetical protein (1)                                  | zinc ion binding [GO:0008270 molecular_function] (1)                                                                                                                                                                                                                                                               | Zinc finger, PMZ-type [IPR006564] (1); Zinc finger, SWIM-type [IPR007527] (1); MULE transposase domain [IPR018209] (1)                                                                                                        | -                               | -                            | P_trifoliata_00824_mRNA_2,1     |
| GF0050771 | 0                            | 0                         | 0                            | 1 Hypothetical protein (1)                                  |                                                                                                                                                                                                                                                                                                                    |                                                                                                                                                                                                                               | -                               | -                            | P_trifoliata_00824_mRNA_1,1     |
| GF0050770 | 0                            | 0                         | 0                            | 1 Hypothetical protein (1)                                  |                                                                                                                                                                                                                                                                                                                    |                                                                                                                                                                                                                               | -                               | -                            | P_trifoliata_00823_mRNA_8,1     |
| GF0050769 | 0                            | 0                         | 0                            | 1 Hypothetical protein (1)                                  |                                                                                                                                                                                                                                                                                                                    |                                                                                                                                                                                                                               | -                               | -                            | P_trifoliata_00823_mRNA_7,1     |
| GF0050768 | 0                            | 0                         | 0                            | 1 Zinc knuckle family protein (1)                           |                                                                                                                                                                                                                                                                                                                    | Domain of unknown function DUF4219 [IPR025314] (1)                                                                                                                                                                            | -                               | -                            | P_trifoliata_00823_mRNA_3,1     |
| GF0050767 | 0                            | 0                         | 0                            | 1 Hypothetical protein (1)                                  |                                                                                                                                                                                                                                                                                                                    |                                                                                                                                                                                                                               | -                               | -                            | P_trifoliata_00823_mRNA_1,1     |
| GF0050766 | 0                            | 0                         | 0                            | 1 Cyclic nucleotide-gated ion channel 1 (1)                 |                                                                                                                                                                                                                                                                                                                    | Cyclic nucleotide-binding domain [IPR00995] (1); RsmC-like jelly roll fold [IPR014710] (1); Cyclic nucleotide-binding-like [IPR018490] (1)                                                                                    | -                               | -                            | P_trifoliata_00821_mRNA_8,1     |
| GF0050765 | 0                            | 0                         | 0                            | 1 Hypothetical protein (1)                                  | protein binding [GO:0005515 molecular_function] (1)                                                                                                                                                                                                                                                                | F-box domain [IPR01810] (1)                                                                                                                                                                                                   | -                               | -                            | P_trifoliata_00821_mRNA_7,1     |
| GF0050764 | 0                            | 0                         | 0                            | 1 Retrotransposon protein, putative, Ty1-copia subclass (1) |                                                                                                                                                                                                                                                                                                                    |                                                                                                                                                                                                                               | -                               | -                            | P_trifoliata_00821_mRNA_6,1     |
| GF0050763 | 0                            | 0                         | 0                            | 1 Hypothetical protein (1)                                  |                                                                                                                                                                                                                                                                                                                    | Reverse transcriptase domain [IPR006477] (1)                                                                                                                                                                                  | -                               | -                            | P_trifoliata_00821_mRNA_5,1     |
| GF0050762 | 0                            | 0                         | 0                            | 1 Hypothetical protein (1)                                  |                                                                                                                                                                                                                                                                                                                    |                                                                                                                                                                                                                               | -                               | -                            | P_trifoliata_00821_mRNA_3,1     |
| GF0050761 | 0                            | 0                         | 0                            | 1 Hypothetical protein (1)                                  |                                                                                                                                                                                                                                                                                                                    |                                                                                                                                                                                                                               | -                               | -                            | P_trifoliata_00821_mRNA_1,1     |
| GF0050760 | 0                            | 0                         | 0                            | 1 Hypothetical protein (1)                                  |                                                                                                                                                                                                                                                                                                                    |                                                                                                                                                                                                                               | -                               | -                            | P_trifoliata_00820_mRNA_9,1     |
| GF0050759 | 0                            | 0                         | 0                            | 1 Hypothetical protein (1)                                  |                                                                                                                                                                                                                                                                                                                    |                                                                                                                                                                                                                               | -                               | -                            | P_trifoliata_00820_mRNA_8,1     |
| GF0050758 | 0                            | 0                         | 0                            | 1 Hypothetical protein (1)                                  |                                                                                                                                                                                                                                                                                                                    |                                                                                                                                                                                                                               | -                               | -                            | P_trifoliata_00820_mRNA_7,1     |
| GF0050757 | 0                            | 0                         | 0                            | 1 Cysteine-rich receptor-like protein kinase 10 (1)         | protein phosphorylation [GO:0006468 biological_process] (1); protein kinase activity [GO:0004672 molecular_function] (1)                                                                                                                                                                                           | Protein kinase-like domain [IPR011009] (1); Serine-threonine/tyrosine-protein kinase catalytic domain [IPR001245] (1)                                                                                                         | -                               | -                            | P_trifoliata_00820_mRNA_2,1     |
| GF0050756 | 0                            | 0                         | 0                            | 1 Hypothetical protein (1)                                  |                                                                                                                                                                                                                                                                                                                    |                                                                                                                                                                                                                               | -                               | -                            | P_trifoliata_00820_mRNA_10,1    |
| GF0050755 | 0                            | 0                         | 0                            | 1 Hypothetical protein (1)                                  |                                                                                                                                                                                                                                                                                                                    |                                                                                                                                                                                                                               | -                               | -                            | P_trifoliata_00819_mRNA_6,1     |
| GF0050754 | 0                            | 0                         | 0                            | 1 Hypothetical protein (1)                                  | protein binding [GO:0005515 molecular_function] (1)                                                                                                                                                                                                                                                                | Ankyrin repeat [IPR002110] (1); Ankyrin repeat-containing domain [IPR020683] (1)                                                                                                                                              | -                               | -                            | P_trifoliata_00819_mRNA_4,1     |
| GF0050753 | 0                            | 0                         | 0                            | 1 Hypothetical protein (1)                                  |                                                                                                                                                                                                                                                                                                                    |                                                                                                                                                                                                                               | -                               | -                            | P_trifoliata_00819_mRNA_3,1     |
| GF0050752 | 0                            | 0                         | 0                            | 1 Hypothetical protein (1)                                  |                                                                                                                                                                                                                                                                                                                    |                                                                                                                                                                                                                               | -                               | -                            | P_trifoliata_00818_mRNA_6,1     |
| GF0050751 | 0                            | 0                         | 0                            | 1 Hypothetical protein (1)                                  |                                                                                                                                                                                                                                                                                                                    |                                                                                                                                                                                                                               | -                               | -                            | P_trifoliata_00818_mRNA_3,1     |
| GF0050750 | 0                            | 0                         | 0                            | 1 Hypothetical protein (1)                                  |                                                                                                                                                                                                                                                                                                                    |                                                                                                                                                                                                                               | -                               | -                            | P_trifoliata_00818_mRNA_2,1     |
| GF0050749 | 0                            | 0                         | 0                            | 1 Hypothetical protein (1)                                  |                                                                                                                                                                                                                                                                                                                    |                                                                                                                                                                                                                               | -                               | -                            | P_trifoliata_00818_mRNA_1,1     |
| GF0050748 | 0                            | 0                         | 0                            | 1 Hypothetical protein (1)                                  |                                                                                                                                                                                                                                                                                                                    |                                                                                                                                                                                                                               | -                               | -                            | P_trifoliata_00817_mRNA_9,1     |
| GF0050747 | 0                            | 0                         | 0                            | 1 Disease resistance protein (1)                            | ADP binding [GO:0043531 molecular_function] (1)                                                                                                                                                                                                                                                                    | P-loop containing nucleoside triphosphate hydrolase [IPR027417] (1); NB-ARC [IPR002182] (1)                                                                                                                                   | -                               | -                            | P_trifoliata_00817_mRNA_4,1     |
| GF0050746 | 0                            | 0                         | 0                            | 1 Ligatin (1)                                               | translation initiation factor activity [GO:0003743 molecular_function] (1); translational initiation [GO:0006413 biological_process] (1); protein binding [GO:0005515 molecular_function] (1)                                                                                                                      | SWIM/MDM2 domain [IPR003121] (1); Translation initiation factor SU1 [IPR001950] (1)                                                                                                                                           | -                               | -                            | P_trifoliata_00817_mRNA_2,1     |
| GF0050745 | 0                            | 0                         | 0                            | 1 Hypothetical protein (1)                                  | hydrolase activity [GO:0016787 molecular_function] (1); metabolic process [GO:0008152 biological_process] (1)                                                                                                                                                                                                      | Alpha/Beta hydrolase fold [IPR029058] (1); Alpha/beta hydrolase fold-3 [IPR013094] (1)                                                                                                                                        | -                               | -                            | P_trifoliata_00817_mRNA_10,1    |
| GF0050744 | 0                            | 0                         | 0                            | 1 Hypothetical protein (1)                                  | nucleic acid binding [GO:0003676 molecular_function] (1); nucleotide binding [GO:0000166 molecular_function] (1)                                                                                                                                                                                                   | RNA recognition motif domain [IPR00504] (1); Nucleotide-binding alpha-beta plat domain [IPR012677] (1)                                                                                                                        | -                               | -                            | P_trifoliata_00817_mRNA_1,1     |
| GF0050743 | 0                            | 0                         | 0                            | 1 Hypothetical protein (1)                                  |                                                                                                                                                                                                                                                                                                                    |                                                                                                                                                                                                                               | -                               | -                            | P_trifoliata_00816_mRNA_9,1     |
| GF0050742 | 0                            | 0                         | 0                            | 1 Hypothetical protein (1)                                  |                                                                                                                                                                                                                                                                                                                    |                                                                                                                                                                                                                               | -                               | -                            | P_trifoliata_00816_mRNA_13,1    |
| GF0050741 | 0                            | 0                         | 0                            | 1 Hypothetical protein (1)                                  |                                                                                                                                                                                                                                                                                                                    |                                                                                                                                                                                                                               | -                               | -                            | P_trifoliata_00815_mRNA_8,1     |
| GF0050740 | 0                            | 0                         | 0                            | 1 Hypothetical protein (1)                                  |                                                                                                                                                                                                                                                                                                                    |                                                                                                                                                                                                                               | -                               | -                            | P_trifoliata_00815_mRNA_7,1     |
| GF0050739 | 0                            | 0                         | 0                            | 1 Hypothetical protein (1)                                  |                                                                                                                                                                                                                                                                                                                    |                                                                                                                                                                                                                               | -                               | -                            | P_trifoliata_00815_mRNA_6,1     |
| GF0050738 | 0                            | 0                         | 0                            | 1 Hypothetical protein (1)                                  |                                                                                                                                                                                                                                                                                                                    |                                                                                                                                                                                                                               | -                               | -                            | P_trifoliata_00815_mRNA_5,1     |
| GF0050737 | 0                            | 0                         | 0                            | 1 Hypothetical protein (1)                                  |                                                                                                                                                                                                                                                                                                                    |                                                                                                                                                                                                                               | -                               | -                            | P_trifoliata_00815_mRNA_4,1     |
| GF0050736 | 0                            | 0                         | 0                            | 1 PHD finger plant-like protein (1)                         |                                                                                                                                                                                                                                                                                                                    |                                                                                                                                                                                                                               | -                               | -                            | P_trifoliata_00815_mRNA_2,1     |
| GF0050735 | 0                            | 0                         | 0                            | 1 Hypothetical protein (1)                                  | oxidoreductase activity [GO:0016491 molecular_function] (1); oxidation-reduction process [GO:0055114 biological_process] (1); oxidoreductase activity, acting on CH-OH group of donors [GO:0016614 molecular_function] (1)                                                                                         | FAD/NAD(P)-binding domain [IPR023753] (1); Glucose-methanol-choline oxidoreductase, C-terminal [IPR007867] (1)                                                                                                                | -                               | -                            | P_trifoliata_00815_mRNA_14,1    |
| GF0050734 | 0                            | 0                         | 0                            | 1 Hypothetical protein (1)                                  |                                                                                                                                                                                                                                                                                                                    |                                                                                                                                                                                                                               | -                               | -                            | P_trifoliata_00815_mRNA_13,1    |
| GF0050733 | 0                            | 0                         | 0                            | 1 Hypothetical protein (1)                                  |                                                                                                                                                                                                                                                                                                                    |                                                                                                                                                                                                                               | -                               | -                            | P_trifoliata_00815_mRNA_11,1    |
| GF0050732 | 0                            | 0                         | 0                            | 1 Hypothetical protein (1)                                  |                                                                                                                                                                                                                                                                                                                    |                                                                                                                                                                                                                               | -                               | -                            | P_trifoliata_00815_mRNA_10,1    |
| GF0050731 | 0                            | 0                         | 0                            | 1 Ankyrin repeat protein-like (1)                           | protein binding [GO:0005515 molecular_function] (1)                                                                                                                                                                                                                                                                | Ankyrin repeat [IPR002110] (1); Ankyrin repeat-containing domain [IPR020683] (1)                                                                                                                                              | -                               | -                            | P_trifoliata_00814_mRNA_8,1     |
| GF0050730 | 0                            | 0                         | 0                            | 1 Hypothetical protein (1)                                  |                                                                                                                                                                                                                                                                                                                    | Zinc finger, RINGFYVE/PHD-type [IPR013083] (1)                                                                                                                                                                                | -                               | -                            | P_trifoliata_00814_mRNA_3,1     |
| GF0050729 | 0                            | 0                         | 0                            | 1 tRNA dimethylallyltransferase (1)                         | tRNA processing [GO:0008033 biological_process] (1)                                                                                                                                                                                                                                                                | P-loop containing nucleoside triphosphate hydrolase [IPR027417] (1); tRNA dimethylallyltransferase [IPR018075] (1)                                                                                                            | -                               | -                            | P_trifoliata_00813_mRNA_7,1     |
| GF0050728 | 0                            | 0                         | 0                            | 1 Hypothetical protein (1)                                  |                                                                                                                                                                                                                                                                                                                    |                                                                                                                                                                                                                               | -                               | -                            | P_trifoliata_00813_mRNA_1,1     |
| GF0050727 | 0                            | 0                         | 0                            | 1 Hypothetical protein (1)                                  |                                                                                                                                                                                                                                                                                                                    |                                                                                                                                                                                                                               | -                               | -                            | P_trifoliata_00812_mRNA_5,1     |
| GF0050726 | 0                            | 0                         | 0                            | 1 Cytochrome P450 monooxygenase CYP83A1 (1)                 | heme binding [GO:0020037 molecular_function] (1); iron ion binding [GO:0005506 molecular_function] (1); oxidation-reduction process [GO:0055114 biological_process] (1); oxidoreductase activity, acting on paired donors, with incorporation or reduction of molecular oxygen [GO:0016705 molecular_function] (1) | Cytochrome P450 [IPR001128] (1); Cytochrome P450, E-class, group I [IPR002401] (1)                                                                                                                                            | -                               | -                            | P_trifoliata_00812_mRNA_3,1     |
| GF0050725 | 0                            | 0                         | 0                            | 1 Hypothetical protein (1)                                  | nutrient reservoir activity [GO:0045735 molecular_function] (1)                                                                                                                                                                                                                                                    | Cupin 1 [IPR006045] (1); RsmC-like jelly roll fold [IPR014710] (1); RsmC-like cupin domain [IPR011051] (1)                                                                                                                    | -                               | -                            | P_trifoliata_00812_mRNA_13,1    |
| GF0050724 | 0                            | 0                         | 0                            | 1 Hypothetical protein (1)                                  | protein N-linked glycosylation [GO:0006487 biological_process] (1); membrane [GO:0001602 cellular_component] (1); beta-1,4-mannosylglycoprotein 4-beta-N-acetylglucosaminyltransferase activity [GO:0003830 molecular_function] (1)                                                                                | Glycosyl transferase, family 17 [IPR06813] (1)                                                                                                                                                                                | -                               | -                            | P_trifoliata_00812_mRNA_1,1     |
| GF0050723 | 0                            | 0                         | 0                            | 1 Hypothetical protein (1)                                  | protein binding [GO:0005515 molecular_function] (1); RNA processing [GO:0006396 biological_process] (1)                                                                                                                                                                                                            | HAT (Half-A-TPR) repeat [IPR003107] (1); Tetraatricopeptide-like helical domain [IPR011990] (1)                                                                                                                               | -                               | -                            | P_trifoliata_00811_mRNA_5,1     |
| GF0050722 | 0                            | 0                         | 0                            | 1 Hypothetical protein (1)                                  |                                                                                                                                                                                                                                                                                                                    |                                                                                                                                                                                                                               | -                               | -                            | P_trifoliata_00811_mRNA_4,1     |
| GF0050721 | 0                            | 0                         | 0                            | 1 Hypothetical protein (1)                                  |                                                                                                                                                                                                                                                                                                                    |                                                                                                                                                                                                                               | -                               | -                            | P_trifoliata_00810_mRNA_9,1     |
| GF0050720 | 0                            | 0                         | 0                            | 1 Caffeic acid 3-O-methyltransferase (1)                    | O-methyltransferase activity [GO:0008171 molecular_function] (1); methyltransferase activity [GO:0008168 molecular_function] (1)                                                                                                                                                                                   | S-adenosyl-L-methionine-dependent methyltransferase [IPR029063] (1); O-methyltransferase, family 2 [IPR010177] (1); Winged helix-turn-helix DNA-binding domain [IPR011991] (1); O-methyltransferase COMT-type [IPR016461] (1) | -                               | -                            | P_trifoliata_00810_mRNA_8,1     |
| GF0050719 | 0                            | 0                         | 0                            | 1 Hypothetical protein (1)                                  |                                                                                                                                                                                                                                                                                                                    |                                                                                                                                                                                                                               | -                               | -                            | P_trifoliata_00810_mRNA_6,1     |
| GF0050718 | 0                            | 0                         | 0                            | 1 Hypothetical protein (1)                                  |                                                                                                                                                                                                                                                                                                                    |                                                                                                                                                                                                                               | -                               | -                            | P_trifoliata_00810_mRNA_11,1    |
| GF0050717 | 0                            | 0                         | 0                            | 1 Hypothetical protein (1)                                  |                                                                                                                                                                                                                                                                                                                    | Myb/SANT-like domain [IPR024752] (1)                                                                                                                                                                                          | -                               | -                            | P_trifoliata_00810_mRNA_1,1     |
| GF0050716 | 0                            | 0                         | 0                            | 1 Caffeic acid 3-O-methyltransferase (1)                    | O-methyltransferase activity [GO:0008171 molecular_function] (1); zinc ion binding [GO:0008270 molecular_function] (1); methyltransferase activity [GO:0008168 molecular_function] (1)                                                                                                                             | O-methyltransferase COMT-type [IPR016461] (1); O-methyltransferase, family 2 [IPR010177] (1); Zinc finger, SWIM-type [IPR007527] (1); S-adenosyl-L-methionine-dependent methyltransferase [IPR029063] (1)                     | -                               | -                            | P_trifoliata_00809_mRNA_3,1     |
| GF0050715 | 0                            | 0                         | 0                            | 1 Hypothetical protein (1)                                  | zinc ion binding [GO:0008270 molecular_function] (1)                                                                                                                                                                                                                                                               | Zinc finger, SWIM-type [IPR007527] (1)                                                                                                                                                                                        | -                               | -                            | P_trifoliata_00809_mRNA_1,1     |

| ID        | Num. in <i>C. clementiae</i> | Num. in <i>C. canthii</i> | Num. in <i>P. trifoliata</i> | Note                                                                   | GO                                                                                                                                                                                                                                                                                       | InterPro                                                                                                                                                                                                                                                                                                                                                                                      | Members in <i>C. clementiae</i> | Members in <i>C. canthii</i> | Members in <i>P. trifoliata</i> |
|-----------|------------------------------|---------------------------|------------------------------|------------------------------------------------------------------------|------------------------------------------------------------------------------------------------------------------------------------------------------------------------------------------------------------------------------------------------------------------------------------------|-----------------------------------------------------------------------------------------------------------------------------------------------------------------------------------------------------------------------------------------------------------------------------------------------------------------------------------------------------------------------------------------------|---------------------------------|------------------------------|---------------------------------|
| GF0050714 | 0                            | 0                         | 1                            | Hypothetical protein (1)                                               | metal ion binding [GO:0046872 molecular_function] (1); oxidation-reduction process [GO:005114 biological_process] (1); oxidoreductase activity, acting on single donors with incorporation of molecular oxygen, incorporation of two atoms of oxygen [GO:0016702 molecular_function] (1) | Lipoxygenase, C-terminal [IPR013819] (1); Lipoxygenase [IPR000907] (1)                                                                                                                                                                                                                                                                                                                        | -                               | -                            | P_trifoliata_0808_mRNA_2,1      |
| GF0050713 | 0                            | 0                         | 1                            | Hypothetical protein (1)                                               |                                                                                                                                                                                                                                                                                          |                                                                                                                                                                                                                                                                                                                                                                                               |                                 |                              | P_trifoliata_0808_mRNA_13,1     |
| GF0050712 | 0                            | 0                         | 1                            | Hypothetical protein (1)                                               |                                                                                                                                                                                                                                                                                          | Ballo-type lectin domain [IPR001480] (1); Concanavalin A-like lectin-glucanase domain [IPR013320] (1); Protein kinase-like domain [IPR011009] (1); Protein kinase domain [IPR000719] (1); Serine/threonine/tyrosine-specific protein kinase, catalytic domain [IPR002290] (1); Protein kinase, ATP binding site [IPR017441] (1); Serine/threonine-protein kinase, active site [IPR008271] (1) |                                 |                              | P_trifoliata_0808_mRNA_12,1     |
| GF0050711 | 0                            | 0                         | 1                            | G-type lectin S-receptor-like serine/threonine-protein kinase RLK1 (1) | ATP binding [GO:0005524 molecular_function] (1); protein phosphorylation [GO:0006468 biological_process] (1); protein kinase activity [GO:0004672 molecular_function] (1)                                                                                                                |                                                                                                                                                                                                                                                                                                                                                                                               |                                 |                              | P_trifoliata_0808_mRNA_10,1     |
| GF0050710 | 0                            | 0                         | 1                            | Hypothetical protein (1)                                               |                                                                                                                                                                                                                                                                                          |                                                                                                                                                                                                                                                                                                                                                                                               |                                 |                              | P_trifoliata_0808_mRNA_1,1      |
| GF0050709 | 0                            | 0                         | 1                            | Hypothetical protein (1)                                               |                                                                                                                                                                                                                                                                                          |                                                                                                                                                                                                                                                                                                                                                                                               |                                 |                              | P_trifoliata_0807_mRNA_8,1      |
| GF0050708 | 0                            | 0                         | 1                            | Hypothetical protein (1)                                               |                                                                                                                                                                                                                                                                                          |                                                                                                                                                                                                                                                                                                                                                                                               |                                 |                              | P_trifoliata_0807_mRNA_7,1      |
| GF0050707 | 0                            | 0                         | 1                            | Hypothetical protein (1)                                               | protein binding [GO:0005515 molecular_function] (1)                                                                                                                                                                                                                                      | Leucine-rich repeat domain, L domain-like [IPR032675] (1); Leucine-rich repeat [IPR001611] (1)                                                                                                                                                                                                                                                                                                |                                 |                              | P_trifoliata_0807_mRNA_6,1      |
| GF0050706 | 0                            | 0                         | 1                            | Hypothetical protein (1)                                               |                                                                                                                                                                                                                                                                                          |                                                                                                                                                                                                                                                                                                                                                                                               |                                 |                              | P_trifoliata_0807_mRNA_4,1      |
| GF0050705 | 0                            | 0                         | 1                            | Hypothetical protein (1)                                               |                                                                                                                                                                                                                                                                                          |                                                                                                                                                                                                                                                                                                                                                                                               |                                 |                              | P_trifoliata_0807_mRNA_2,1      |
| GF0050704 | 0                            | 0                         | 1                            | Hypothetical protein (1)                                               |                                                                                                                                                                                                                                                                                          | Transposon, En/Spm-like [IPR004242] (1)                                                                                                                                                                                                                                                                                                                                                       |                                 |                              | P_trifoliata_0806_mRNA_8,1      |
| GF0050703 | 0                            | 0                         | 1                            | Hypothetical protein (1)                                               |                                                                                                                                                                                                                                                                                          |                                                                                                                                                                                                                                                                                                                                                                                               |                                 |                              | P_trifoliata_0806_mRNA_16,1     |
| GF0050702 | 0                            | 0                         | 1                            | Hypothetical protein (1)                                               |                                                                                                                                                                                                                                                                                          |                                                                                                                                                                                                                                                                                                                                                                                               |                                 |                              | P_trifoliata_0806_mRNA_15,1     |
| GF0050701 | 0                            | 0                         | 1                            | Hypothetical protein (1)                                               | nucleic acid binding [GO:0003676 molecular_function] (1)                                                                                                                                                                                                                                 | Ribonuclease H-like domain [IPR012337] (1)                                                                                                                                                                                                                                                                                                                                                    |                                 |                              | P_trifoliata_0806_mRNA_12,1     |
| GF0050700 | 0                            | 0                         | 1                            | Hypothetical protein (1)                                               |                                                                                                                                                                                                                                                                                          |                                                                                                                                                                                                                                                                                                                                                                                               |                                 |                              | P_trifoliata_0806_mRNA_11,1     |
| GF0050699 | 0                            | 0                         | 1                            | Hypothetical protein (1)                                               |                                                                                                                                                                                                                                                                                          |                                                                                                                                                                                                                                                                                                                                                                                               |                                 |                              | P_trifoliata_0806_mRNA_10,1     |
| GF0050698 | 0                            | 0                         | 1                            | Hypothetical protein (1)                                               |                                                                                                                                                                                                                                                                                          |                                                                                                                                                                                                                                                                                                                                                                                               |                                 |                              | P_trifoliata_0806_mRNA_1,1      |
| GF0050697 | 0                            | 0                         | 1                            | Hypothetical protein (1)                                               |                                                                                                                                                                                                                                                                                          |                                                                                                                                                                                                                                                                                                                                                                                               |                                 |                              | P_trifoliata_0805_mRNA_7,1      |
| GF0050696 | 0                            | 0                         | 1                            | Hypothetical protein (1)                                               |                                                                                                                                                                                                                                                                                          |                                                                                                                                                                                                                                                                                                                                                                                               |                                 |                              | P_trifoliata_0805_mRNA_5,1      |
| GF0050695 | 0                            | 0                         | 1                            | LRR receptor-like kinase (1)                                           | protein binding [GO:0005515 molecular_function] (1)                                                                                                                                                                                                                                      | Leucine-rich repeat domain, L domain-like [IPR032675] (1); Leucine-rich repeat-containing N-terminal, plant-type [IPR013210] (1); Leucine-rich repeat [IPR001611] (1)                                                                                                                                                                                                                         |                                 |                              | P_trifoliata_0805_mRNA_4,1      |
| GF0050694 | 0                            | 0                         | 1                            | Hypothetical protein (1)                                               |                                                                                                                                                                                                                                                                                          |                                                                                                                                                                                                                                                                                                                                                                                               |                                 |                              | P_trifoliata_0805_mRNA_1,1      |
| GF0050693 | 0                            | 0                         | 1                            | Transposable element Ac (1)                                            | DNA binding [GO:0003677 molecular_function] (1); nucleic acid binding [GO:0003676 molecular_function] (1); protein dimerization activity [GO:0046983 molecular_function] (1)                                                                                                             | hAT-like transposase, RNase-H fold [IPR025252] (1); Ribonuclease H-like domain [IPR013371] (1); hAT, C-terminal dimerization domain [IPR008906] (1)                                                                                                                                                                                                                                           |                                 |                              | P_trifoliata_0804_mRNA_7,1      |
| GF0050692 | 0                            | 0                         | 1                            | Hypothetical protein (1)                                               | methyltransferase activity [GO:0008168 molecular_function] (1)                                                                                                                                                                                                                           | S-adenosyl-L-methionine-dependent methyltransferase [IPR020651] (1); SAM dependent carboxyl methyltransferase [IPR005299] (1)                                                                                                                                                                                                                                                                 |                                 |                              | P_trifoliata_0804_mRNA_5,1      |
| GF0050691 | 0                            | 0                         | 1                            | Hypothetical protein (1)                                               |                                                                                                                                                                                                                                                                                          |                                                                                                                                                                                                                                                                                                                                                                                               |                                 |                              | P_trifoliata_0804_mRNA_3,1      |
| GF0050690 | 0                            | 0                         | 1                            | Hypothetical protein (1)                                               |                                                                                                                                                                                                                                                                                          |                                                                                                                                                                                                                                                                                                                                                                                               |                                 |                              | P_trifoliata_0804_mRNA_2,1      |
| GF0050689 | 0                            | 0                         | 1                            | Hypothetical protein (1)                                               |                                                                                                                                                                                                                                                                                          |                                                                                                                                                                                                                                                                                                                                                                                               |                                 |                              | P_trifoliata_0804_mRNA_1,1      |
| GF0050688 | 0                            | 0                         | 1                            | Hypothetical protein (1)                                               |                                                                                                                                                                                                                                                                                          |                                                                                                                                                                                                                                                                                                                                                                                               |                                 |                              | P_trifoliata_0803_mRNA_5,1      |
| GF0050687 | 0                            | 0                         | 1                            | Hypothetical protein (1)                                               |                                                                                                                                                                                                                                                                                          |                                                                                                                                                                                                                                                                                                                                                                                               |                                 |                              | P_trifoliata_0803_mRNA_4,1      |
| GF0050686 | 0                            | 0                         | 1                            | Hypothetical protein (1)                                               |                                                                                                                                                                                                                                                                                          |                                                                                                                                                                                                                                                                                                                                                                                               |                                 |                              | P_trifoliata_0803_mRNA_3,1      |
| GF0050685 | 0                            | 0                         | 1                            | Hypothetical protein (1)                                               |                                                                                                                                                                                                                                                                                          |                                                                                                                                                                                                                                                                                                                                                                                               |                                 |                              | P_trifoliata_0803_mRNA_2,1      |
| GF0050684 | 0                            | 0                         | 1                            | Hypothetical protein (1)                                               |                                                                                                                                                                                                                                                                                          |                                                                                                                                                                                                                                                                                                                                                                                               |                                 |                              | P_trifoliata_0803_mRNA_1,1      |
| GF0050683 | 0                            | 0                         | 1                            | Hypothetical protein (1)                                               |                                                                                                                                                                                                                                                                                          |                                                                                                                                                                                                                                                                                                                                                                                               |                                 |                              | P_trifoliata_0802_mRNA_6,1      |
| GF0050682 | 0                            | 0                         | 1                            | Hemopexin (1)                                                          |                                                                                                                                                                                                                                                                                          | Endonuclease/exonuclease/phosphatase [IPR005135] (1)                                                                                                                                                                                                                                                                                                                                          |                                 |                              | P_trifoliata_0802_mRNA_5,1      |
| GF0050681 | 0                            | 0                         | 1                            | Hypothetical protein (1)                                               |                                                                                                                                                                                                                                                                                          |                                                                                                                                                                                                                                                                                                                                                                                               |                                 |                              | P_trifoliata_0801_mRNA_5,1      |
| GF0050680 | 0                            | 0                         | 1                            | Putative WRKY transcription factor 28 (1)                              | regulation of transcription, DNA-templated [GO:0006355 biological_process] (1); sequence-specific DNA binding [GO:0043565 molecular_function] (1); transcription factor activity, sequence-specific DNA binding [GO:0003700 molecular_function] (1)                                      | WRKY domain [IPR003657] (1)                                                                                                                                                                                                                                                                                                                                                                   |                                 |                              | P_trifoliata_0801_mRNA_4,1      |
| GF0050679 | 0                            | 0                         | 1                            | Hypothetical protein (1)                                               |                                                                                                                                                                                                                                                                                          |                                                                                                                                                                                                                                                                                                                                                                                               |                                 |                              | P_trifoliata_0800_mRNA_4,1      |
| GF0050678 | 0                            | 0                         | 1                            | Hypothetical protein (1)                                               |                                                                                                                                                                                                                                                                                          |                                                                                                                                                                                                                                                                                                                                                                                               |                                 |                              | P_trifoliata_0800_mRNA_2,1      |
| GF0050677 | 0                            | 0                         | 1                            | Hypothetical protein (1)                                               |                                                                                                                                                                                                                                                                                          | Domain of unknown function DJF4283 [IPR025558] (1)                                                                                                                                                                                                                                                                                                                                            |                                 |                              | P_trifoliata_0800_mRNA_1,1      |
| GF0050676 | 0                            | 0                         | 1                            | Hypothetical protein (1)                                               |                                                                                                                                                                                                                                                                                          |                                                                                                                                                                                                                                                                                                                                                                                               |                                 |                              | P_trifoliata_00799_mRNA_1,1     |
| GF0050675 | 0                            | 0                         | 1                            | Hypothetical protein (1)                                               |                                                                                                                                                                                                                                                                                          |                                                                                                                                                                                                                                                                                                                                                                                               |                                 |                              | P_trifoliata_00798_mRNA_15,1    |
| GF0050674 | 0                            | 0                         | 1                            | Ac-like transposase THELMA13 (1)                                       | DNA binding [GO:0003677 molecular_function] (1); nucleic acid binding [GO:0003676 molecular_function] (1)                                                                                                                                                                                | Zinc finger, BED-type [IPR003656] (1); Ribonuclease H-like domain [IPR012337] (1); hAT-like transposase, RNase-H fold [IPR025252] (1)                                                                                                                                                                                                                                                         |                                 |                              | P_trifoliata_00798_mRNA_14,1    |
| GF0050673 | 0                            | 0                         | 1                            | Hypothetical protein (1)                                               |                                                                                                                                                                                                                                                                                          |                                                                                                                                                                                                                                                                                                                                                                                               |                                 |                              | P_trifoliata_00798_mRNA_13,1    |
| GF0050672 | 0                            | 0                         | 1                            | Hypothetical protein (1)                                               |                                                                                                                                                                                                                                                                                          |                                                                                                                                                                                                                                                                                                                                                                                               |                                 |                              | P_trifoliata_00798_mRNA_10,1    |
| GF0050671 | 0                            | 0                         | 1                            | Hypothetical protein (1)                                               |                                                                                                                                                                                                                                                                                          | Viral movement protein [IPR028919] (1); Leucine-rich repeat 2 [IPR013101] (1); Leucine-rich repeat domain, L domain-like [IPR032675] (1)                                                                                                                                                                                                                                                      |                                 |                              | P_trifoliata_00798_mRNA_1,1     |
| GF0050670 | 0                            | 0                         | 1                            | Hypothetical protein (1)                                               |                                                                                                                                                                                                                                                                                          |                                                                                                                                                                                                                                                                                                                                                                                               |                                 |                              | P_trifoliata_00797_mRNA_4,1     |
| GF0050669 | 0                            | 0                         | 1                            | Hypothetical protein (1)                                               |                                                                                                                                                                                                                                                                                          |                                                                                                                                                                                                                                                                                                                                                                                               |                                 |                              | P_trifoliata_00797_mRNA_2,1     |
| GF0050668 | 0                            | 0                         | 1                            | Acylsugar acyltransferase 3 (1)                                        | transferase activity, transferring acyl groups other than amino-acyl groups [GO:0016747 molecular_function] (1)                                                                                                                                                                          | Transferase [IPR003480] (1); Chloroacetyl acyltransferase-like domain [IPR023213] (1); PGG domain [IPR002696] (1)                                                                                                                                                                                                                                                                             |                                 |                              | P_trifoliata_00797_mRNA_1,1     |
| GF0050667 | 0                            | 0                         | 1                            | Audyrin repeat family protein (1)                                      |                                                                                                                                                                                                                                                                                          |                                                                                                                                                                                                                                                                                                                                                                                               |                                 |                              | P_trifoliata_00796_mRNA_2,1     |
| GF0050666 | 0                            | 0                         | 1                            | Hypothetical protein (1)                                               |                                                                                                                                                                                                                                                                                          |                                                                                                                                                                                                                                                                                                                                                                                               |                                 |                              | P_trifoliata_00795_mRNA_7,1     |
| GF0050665 | 0                            | 0                         | 1                            | Hypothetical protein (1)                                               |                                                                                                                                                                                                                                                                                          |                                                                                                                                                                                                                                                                                                                                                                                               |                                 |                              | P_trifoliata_00795_mRNA_6,1     |
| GF0050664 | 0                            | 0                         | 1                            | Hypothetical protein (1)                                               |                                                                                                                                                                                                                                                                                          | Alpha crystallin/Hsp20 domain [IPR002068] (1); HSP20-like chaperone [IPR008978] (1); Small heat shock protein HSP20 [IPR031107] (1)                                                                                                                                                                                                                                                           |                                 |                              | P_trifoliata_00795_mRNA_5,1     |
| GF0050663 | 0                            | 0                         | 1                            | Hypothetical protein (1)                                               |                                                                                                                                                                                                                                                                                          | Gamma interferon inducible lysosomal thiol reductase GILT [IPR004911] (1)                                                                                                                                                                                                                                                                                                                     |                                 |                              | P_trifoliata_00795_mRNA_3,1     |
| GF0050662 | 0                            | 0                         | 1                            | Heavy metal transport/detoxification superfamily protein (1)           | metal ion binding [GO:0046872 molecular_function] (1); metal ion transport [GO:0030001 biological_process] (1)                                                                                                                                                                           | Heavy metal-associated domain, HMA [IPR006121] (1)                                                                                                                                                                                                                                                                                                                                            |                                 |                              | P_trifoliata_00794_mRNA_7,1     |
| GF0050661 | 0                            | 0                         | 1                            | Hypothetical protein (1)                                               |                                                                                                                                                                                                                                                                                          |                                                                                                                                                                                                                                                                                                                                                                                               |                                 |                              | P_trifoliata_00794_mRNA_1,1     |
| GF0050660 | 0                            | 0                         | 1                            | Hypothetical protein (1)                                               |                                                                                                                                                                                                                                                                                          | SGNH hydrolase-type esterase domain [IPR013850] (1)                                                                                                                                                                                                                                                                                                                                           |                                 |                              | P_trifoliata_00793_mRNA_4,1     |
| GF0050659 | 0                            | 0                         | 1                            | Hypothetical protein (1)                                               | protein phosphorylation [GO:0006468 biological_process] (1); protein kinase activity [GO:0004672 molecular_function] (1); ATP binding [GO:0005524 molecular_function] (1)                                                                                                                | Protein kinase, ATP binding site [IPR017441] (1); Protein kinase-like domain [IPR011009] (1); Protein kinase domain [IPR000719] (1)                                                                                                                                                                                                                                                           |                                 |                              | P_trifoliata_00793_mRNA_2,1     |
| GF0050658 | 0                            | 0                         | 1                            | Hypothetical protein (1)                                               | protein binding [GO:0005515 molecular_function] (1); protein phosphorylation [GO:0006468 biological_process] (1); protein kinase activity [GO:0004672 molecular_function] (1); ATP binding [GO:0005524 molecular_function] (1)                                                           | Leucine-rich repeat [IPR001611] (1); Serine/threonine/tyrosine-specific protein kinase, catalytic domain [IPR002290] (1); Serine/threonine-protein kinase, active site [IPR008271] (1); Protein kinase-like domain [IPR011009] (1); Leucine-rich repeat domain, L domain-like [IPR032675] (1); Leucine-rich repeat, typical subtype [IPR003591] (1); Protein kinase domain [IPR000719] (1)    |                                 |                              | P_trifoliata_00793_mRNA_1,1     |
| GF0050657 | 0                            | 0                         | 1                            | Cytokinin riboside 5'-monophosphate phosphoribohydrolase (1)           |                                                                                                                                                                                                                                                                                          | LOG family [IPR031100] (1)                                                                                                                                                                                                                                                                                                                                                                    |                                 |                              | P_trifoliata_00792_mRNA_7,1     |
| GF0050656 | 0                            | 0                         | 1                            | Hypothetical protein (1)                                               |                                                                                                                                                                                                                                                                                          |                                                                                                                                                                                                                                                                                                                                                                                               |                                 |                              | P_trifoliata_00792_mRNA_6,1     |
| GF0050655 | 0                            | 0                         | 1                            | Hypothetical protein (1)                                               | nucleic acid binding [GO:0003676 molecular_function] (1); zinc ion binding [GO:0008270 molecular_function] (1)                                                                                                                                                                           | Zinc finger, CCHC-type [IPR001878] (1)                                                                                                                                                                                                                                                                                                                                                        |                                 |                              | P_trifoliata_00792_mRNA_1,1     |
| GF0050654 | 0                            | 0                         | 1                            | Myosin heavy chain IB (1)                                              | protein binding [GO:0005515 molecular_function] (1)                                                                                                                                                                                                                                      | SH3 domain [IPR001452] (1)                                                                                                                                                                                                                                                                                                                                                                    |                                 |                              | P_trifoliata_00791_mRNA_6,1     |
| GF0050653 | 0                            | 0                         | 1                            | LRR receptor-like kinase (1)                                           | protein binding [GO:0005515 molecular_function] (1)                                                                                                                                                                                                                                      | Leucine-rich repeat domain, L domain-like [IPR032675] (1); Leucine-rich repeat, typical subtype [IPR003591] (1); Leucine-rich repeat [IPR001611] (1)                                                                                                                                                                                                                                          |                                 |                              | P_trifoliata_00791_mRNA_4,1     |
| GF0050652 | 0                            | 0                         | 1                            | Hypothetical protein (1)                                               | protein binding [GO:0005515 molecular_function] (1)                                                                                                                                                                                                                                      | SH3 domain [IPR001452] (1)                                                                                                                                                                                                                                                                                                                                                                    |                                 |                              | P_trifoliata_00791_mRNA_3,1     |
| GF0050651 | 0                            | 0                         | 1                            | Hypothetical protein (1)                                               | protein binding [GO:0005515 molecular_function] (1)                                                                                                                                                                                                                                      | Leucine-rich repeat [IPR001611] (1); Leucine-rich repeat domain, L domain-like [IPR032675] (1)                                                                                                                                                                                                                                                                                                |                                 |                              | P_trifoliata_00790_mRNA_9,1     |

| ID        | Num. in <i>C. clementiae</i> | Num. in <i>C. canthii</i> | Num. in <i>P. trifoliata</i> | Note                                                                  | GO                                                                                                                                                                                                                                                                                                                                                                                                                                        | InterPro                                                                                                                                                                                                                                                                                                                                                                                                                                                                                                                                      | Members in <i>C. clementiae</i> | Members in <i>C. canthii</i> | Members in <i>P. trifoliata</i> |
|-----------|------------------------------|---------------------------|------------------------------|-----------------------------------------------------------------------|-------------------------------------------------------------------------------------------------------------------------------------------------------------------------------------------------------------------------------------------------------------------------------------------------------------------------------------------------------------------------------------------------------------------------------------------|-----------------------------------------------------------------------------------------------------------------------------------------------------------------------------------------------------------------------------------------------------------------------------------------------------------------------------------------------------------------------------------------------------------------------------------------------------------------------------------------------------------------------------------------------|---------------------------------|------------------------------|---------------------------------|
| GF0050650 | 0                            | 0                         | 1                            | Hypothetical protein (1)                                              | protein binding [GO:0005515 molecular_function] (1)                                                                                                                                                                                                                                                                                                                                                                                       | Leucine-rich repeat [IPR001611] (1); Leucine-rich repeat-containing N-terminal, plant-type [IPR013210] (1); Leucine-rich repeat domain, L domain-like [IPR032675] (1)                                                                                                                                                                                                                                                                                                                                                                         | -                               | -                            | P_trifoliata_00790_mRNA_7,1     |
| GF0050649 | 0                            | 0                         | 1                            | Monosaccharide transport protein (1)                                  |                                                                                                                                                                                                                                                                                                                                                                                                                                           |                                                                                                                                                                                                                                                                                                                                                                                                                                                                                                                                               | -                               | -                            | P_trifoliata_00790_mRNA_11,1    |
| GF0050648 | 0                            | 0                         | 1                            | Hypothetical protein (1)                                              |                                                                                                                                                                                                                                                                                                                                                                                                                                           |                                                                                                                                                                                                                                                                                                                                                                                                                                                                                                                                               | -                               | -                            | P_trifoliata_00789_mRNA_6,1     |
| GF0050647 | 0                            | 0                         | 1                            | Phenylcoumaran benzylic ether reductase-like protein (1)              |                                                                                                                                                                                                                                                                                                                                                                                                                                           | NmrA-like domain [IPR008030] (1); NAD(P)-binding domain [IPR016040] (1)                                                                                                                                                                                                                                                                                                                                                                                                                                                                       | -                               | -                            | P_trifoliata_00789_mRNA_4,1     |
| GF0050646 | 0                            | 0                         | 1                            | Hypothetical protein (1)                                              |                                                                                                                                                                                                                                                                                                                                                                                                                                           |                                                                                                                                                                                                                                                                                                                                                                                                                                                                                                                                               | -                               | -                            | P_trifoliata_00789_mRNA_2,1     |
| GF0050645 | 0                            | 0                         | 1                            | Hypothetical protein (1)                                              |                                                                                                                                                                                                                                                                                                                                                                                                                                           |                                                                                                                                                                                                                                                                                                                                                                                                                                                                                                                                               | -                               | -                            | P_trifoliata_00789_mRNA_1,1     |
| GF0050644 | 0                            | 0                         | 1                            | Hypothetical protein (1)                                              |                                                                                                                                                                                                                                                                                                                                                                                                                                           |                                                                                                                                                                                                                                                                                                                                                                                                                                                                                                                                               | -                               | -                            | P_trifoliata_00788_mRNA_9,1     |
| GF0050643 | 0                            | 0                         | 1                            | Hypothetical protein (1)                                              |                                                                                                                                                                                                                                                                                                                                                                                                                                           |                                                                                                                                                                                                                                                                                                                                                                                                                                                                                                                                               | -                               | -                            | P_trifoliata_00788_mRNA_2,1     |
| GF0050642 | 0                            | 0                         | 1                            | Hypothetical protein (1)                                              |                                                                                                                                                                                                                                                                                                                                                                                                                                           |                                                                                                                                                                                                                                                                                                                                                                                                                                                                                                                                               | -                               | -                            | P_trifoliata_00788_mRNA_11,1    |
| GF0050641 | 0                            | 0                         | 1                            | Hypothetical protein (1)                                              |                                                                                                                                                                                                                                                                                                                                                                                                                                           |                                                                                                                                                                                                                                                                                                                                                                                                                                                                                                                                               | -                               | -                            | P_trifoliata_00788_mRNA_1,1     |
| GF0050640 | 0                            | 0                         | 1                            | Hypothetical protein (1)                                              |                                                                                                                                                                                                                                                                                                                                                                                                                                           |                                                                                                                                                                                                                                                                                                                                                                                                                                                                                                                                               | -                               | -                            | P_trifoliata_00787_mRNA_9,1     |
| GF0050639 | 0                            | 0                         | 1                            | Hypothetical protein (1)                                              |                                                                                                                                                                                                                                                                                                                                                                                                                                           |                                                                                                                                                                                                                                                                                                                                                                                                                                                                                                                                               | -                               | -                            | P_trifoliata_00787_mRNA_7,1     |
| GF0050638 | 0                            | 0                         | 1                            | Hypothetical protein (1)                                              | protein binding [GO:0005515 molecular_function] (1)                                                                                                                                                                                                                                                                                                                                                                                       | GTF domain [IPR003169] (1)                                                                                                                                                                                                                                                                                                                                                                                                                                                                                                                    | -                               | -                            | P_trifoliata_00787_mRNA_6,1     |
| GF0050637 | 0                            | 0                         | 1                            | Hypothetical protein (1)                                              |                                                                                                                                                                                                                                                                                                                                                                                                                                           |                                                                                                                                                                                                                                                                                                                                                                                                                                                                                                                                               | -                               | -                            | P_trifoliata_00787_mRNA_4,1     |
| GF0050636 | 0                            | 0                         | 1                            | Hypothetical protein (1)                                              |                                                                                                                                                                                                                                                                                                                                                                                                                                           |                                                                                                                                                                                                                                                                                                                                                                                                                                                                                                                                               | -                               | -                            | P_trifoliata_00787_mRNA_10,1    |
| GF0050635 | 0                            | 0                         | 1                            | Hypothetical protein (1)                                              |                                                                                                                                                                                                                                                                                                                                                                                                                                           |                                                                                                                                                                                                                                                                                                                                                                                                                                                                                                                                               | -                               | -                            | P_trifoliata_00787_mRNA_1,1     |
| GF0050634 | 0                            | 0                         | 1                            | Hypothetical protein (1)                                              |                                                                                                                                                                                                                                                                                                                                                                                                                                           |                                                                                                                                                                                                                                                                                                                                                                                                                                                                                                                                               | -                               | -                            | P_trifoliata_00786_mRNA_2,1     |
| GF0050633 | 0                            | 0                         | 1                            | Hypothetical protein (1)                                              |                                                                                                                                                                                                                                                                                                                                                                                                                                           |                                                                                                                                                                                                                                                                                                                                                                                                                                                                                                                                               | -                               | -                            | P_trifoliata_00785_mRNA_9,1     |
| GF0050632 | 0                            | 0                         | 1                            | Hypothetical protein (1)                                              |                                                                                                                                                                                                                                                                                                                                                                                                                                           | Viral movement protein [IPR028919] (1)                                                                                                                                                                                                                                                                                                                                                                                                                                                                                                        | -                               | -                            | P_trifoliata_00785_mRNA_8,1     |
| GF0050631 | 0                            | 0                         | 1                            | Hypothetical protein (1)                                              |                                                                                                                                                                                                                                                                                                                                                                                                                                           |                                                                                                                                                                                                                                                                                                                                                                                                                                                                                                                                               | -                               | -                            | P_trifoliata_00785_mRNA_7,1     |
| GF0050630 | 0                            | 0                         | 1                            | Hypothetical protein (1)                                              |                                                                                                                                                                                                                                                                                                                                                                                                                                           |                                                                                                                                                                                                                                                                                                                                                                                                                                                                                                                                               | -                               | -                            | P_trifoliata_00785_mRNA_5,1     |
| GF0050629 | 0                            | 0                         | 1                            | Hypothetical protein (1)                                              |                                                                                                                                                                                                                                                                                                                                                                                                                                           |                                                                                                                                                                                                                                                                                                                                                                                                                                                                                                                                               | -                               | -                            | P_trifoliata_00785_mRNA_4,1     |
| GF0050628 | 0                            | 0                         | 1                            | Hypothetical protein (1)                                              |                                                                                                                                                                                                                                                                                                                                                                                                                                           |                                                                                                                                                                                                                                                                                                                                                                                                                                                                                                                                               | -                               | -                            | P_trifoliata_00785_mRNA_2,1     |
| GF0050627 | 0                            | 0                         | 1                            | Hypothetical protein (1)                                              |                                                                                                                                                                                                                                                                                                                                                                                                                                           |                                                                                                                                                                                                                                                                                                                                                                                                                                                                                                                                               | -                               | -                            | P_trifoliata_00785_mRNA_18,1    |
| GF0050626 | 0                            | 0                         | 1                            | Hypothetical protein (1)                                              |                                                                                                                                                                                                                                                                                                                                                                                                                                           |                                                                                                                                                                                                                                                                                                                                                                                                                                                                                                                                               | -                               | -                            | P_trifoliata_00785_mRNA_16,1    |
| GF0050625 | 0                            | 0                         | 1                            | Hypothetical protein (1)                                              |                                                                                                                                                                                                                                                                                                                                                                                                                                           |                                                                                                                                                                                                                                                                                                                                                                                                                                                                                                                                               | -                               | -                            | P_trifoliata_00785_mRNA_15,1    |
| GF0050624 | 0                            | 0                         | 1                            | Hypothetical protein (1)                                              |                                                                                                                                                                                                                                                                                                                                                                                                                                           |                                                                                                                                                                                                                                                                                                                                                                                                                                                                                                                                               | -                               | -                            | P_trifoliata_00785_mRNA_13,1    |
| GF0050623 | 0                            | 0                         | 1                            | Hypothetical protein (1)                                              |                                                                                                                                                                                                                                                                                                                                                                                                                                           |                                                                                                                                                                                                                                                                                                                                                                                                                                                                                                                                               | -                               | -                            | P_trifoliata_00785_mRNA_11,1    |
| GF0050622 | 0                            | 0                         | 1                            | Hypothetical protein (1)                                              |                                                                                                                                                                                                                                                                                                                                                                                                                                           |                                                                                                                                                                                                                                                                                                                                                                                                                                                                                                                                               | -                               | -                            | P_trifoliata_00785_mRNA_1,1     |
| GF0050621 | 0                            | 0                         | 1                            | Hypothetical protein (1)                                              |                                                                                                                                                                                                                                                                                                                                                                                                                                           | Domain of unknown function DUF4283 [IPR025558] (1)                                                                                                                                                                                                                                                                                                                                                                                                                                                                                            | -                               | -                            | P_trifoliata_00783_mRNA_9,1     |
| GF0050620 | 0                            | 0                         | 1                            | Hypothetical protein (1)                                              |                                                                                                                                                                                                                                                                                                                                                                                                                                           |                                                                                                                                                                                                                                                                                                                                                                                                                                                                                                                                               | -                               | -                            | P_trifoliata_00783_mRNA_8,1     |
| GF0050619 | 0                            | 0                         | 1                            | Hypothetical protein (1)                                              | magnesium ion binding [GO:0000287 molecular_function] (1); integral component of membrane [GO:0016021 cellular_component] (1); phospholipid transport [GO:0015914 biological_process] (1); phospholipid-translocating ATPase activity [GO:0004012 molecular_function] (1); metal ion binding [GO:0046872 molecular_function] (1); nucleotide binding [GO:0001666 molecular_function] (1); ATP binding [GO:0005524 molecular_function] (1) | P-type ATPase, N-terminal [IPR032631] (1); HAD-like domain [IPR023244] (1); P-type ATPase, A domain [IPR008250] (1); P-type ATPase, subfamily IV [IPR006539] (1); P-type ATPase, C-terminal [IPR026301] (1); P-type ATPase [IPR001757] (1)                                                                                                                                                                                                                                                                                                    | -                               | -                            | P_trifoliata_00782_mRNA_1,1     |
| GF0050618 | 0                            | 0                         | 1                            | Transcription factor MYB86 (1)                                        | DNA binding [GO:0003677 molecular_function] (1)                                                                                                                                                                                                                                                                                                                                                                                           | Myb domain [IPR017930] (1); SANT/Myb domain [IPR001005] (1); Homeodomain-like [IPR009057] (1)                                                                                                                                                                                                                                                                                                                                                                                                                                                 | -                               | -                            | P_trifoliata_00781_mRNA_5,1     |
| GF0050617 | 0                            | 0                         | 1                            | Hypothetical protein (1)                                              |                                                                                                                                                                                                                                                                                                                                                                                                                                           |                                                                                                                                                                                                                                                                                                                                                                                                                                                                                                                                               | -                               | -                            | P_trifoliata_00781_mRNA_3,1     |
| GF0050616 | 0                            | 0                         | 1                            | Cytokinin riboside 5'-monophosphate phosphoribohydrolase (1)          |                                                                                                                                                                                                                                                                                                                                                                                                                                           | Domain of unknown function DUF4218 [IPR025452] (1)                                                                                                                                                                                                                                                                                                                                                                                                                                                                                            | -                               | -                            | P_trifoliata_00781_mRNA_2,1     |
| GF0050615 | 0                            | 0                         | 1                            | Hypothetical protein (1)                                              | carbohydrate metabolic process [GO:0005975 biological_process] (1); hydrolase activity, hydrolyzing O-glycosyl compounds [GO:0004553 molecular_function] (1); protein kinase activity [GO:0004672 molecular_function] (1); protein phosphorylation [GO:0006468 biological_process] (1); ATP binding [GO:0005524 molecular_function] (1)                                                                                                   | Serine-threonine tyrosine-protein kinase catalytic domain [IPR012451] (1); Serine/threonine dual specificity protein kinase, catalytic domain [IPR002290] (1); Serine/threonine-protein kinase, active site [IPR002271] (1); Glycoside hydrolase family 18, catalytic domain [IPR001223] (1); Glycoside hydrolase, catalytic domain [IPR013781] (1); Protein kinase-like domain [IPR011009] (1); Protein kinase domain [IPR000719] (1)                                                                                                        | -                               | -                            | P_trifoliata_00780_mRNA_8,1     |
| GF0050614 | 0                            | 0                         | 1                            | Glycosyl hydrolase family protein with chitinase insertion domain (1) | chitin catabolic process [GO:0006032 biological_process] (1); carbohydrate metabolic process [GO:0005975 biological_process] (1); chitinase activity [GO:0004568 molecular_function] (1); hydrolase activity, hydrolyzing O-glycosyl compounds [GO:0004553 molecular_function] (1)                                                                                                                                                        | Chitinase II [IPR011583] (1); Glycoside hydrolase, catalytic domain [IPR013781] (1); Glycoside hydrolase superfamily [IPR017851] (1); Glycoside hydrolase family 18, catalytic domain [IPR001223] (1)                                                                                                                                                                                                                                                                                                                                         | -                               | -                            | P_trifoliata_00780_mRNA_7,1     |
| GF0050613 | 0                            | 0                         | 1                            | Hypothetical protein (1)                                              |                                                                                                                                                                                                                                                                                                                                                                                                                                           | Protein kinase-like domain [IPR011009] (1)                                                                                                                                                                                                                                                                                                                                                                                                                                                                                                    | -                               | -                            | P_trifoliata_00780_mRNA_1,1     |
| GF0050612 | 0                            | 0                         | 1                            | Hypothetical protein (1)                                              | RNA-DNA hybrid ribonuclease activity [GO:0004523 molecular_function] (1); nucleic acid binding [GO:0003676 molecular_function] (1)                                                                                                                                                                                                                                                                                                        | Ribonuclease H-like domain [IPR012337] (1); Ribonuclease H domain [IPR002356] (1)                                                                                                                                                                                                                                                                                                                                                                                                                                                             | -                               | -                            | P_trifoliata_00779_mRNA_9,1     |
| GF0050611 | 0                            | 0                         | 1                            | Hypothetical protein (1)                                              |                                                                                                                                                                                                                                                                                                                                                                                                                                           | Domain of unknown function DUF4219 [IPR025314] (1)                                                                                                                                                                                                                                                                                                                                                                                                                                                                                            | -                               | -                            | P_trifoliata_00779_mRNA_8,1     |
| GF0050610 | 0                            | 0                         | 1                            | Hypothetical protein (1)                                              |                                                                                                                                                                                                                                                                                                                                                                                                                                           |                                                                                                                                                                                                                                                                                                                                                                                                                                                                                                                                               | -                               | -                            | P_trifoliata_00779_mRNA_13,1    |
| GF0050609 | 0                            | 0                         | 1                            | Hypothetical protein (1)                                              |                                                                                                                                                                                                                                                                                                                                                                                                                                           |                                                                                                                                                                                                                                                                                                                                                                                                                                                                                                                                               | -                               | -                            | P_trifoliata_00779_mRNA_12,1    |
| GF0050608 | 0                            | 0                         | 1                            | Hypothetical protein (1)                                              | polygalacturonate 4-epimerase activity [GO:0047262 molecular_function] (1)                                                                                                                                                                                                                                                                                                                                                                | Plant galacturosyltransferase GAUT [IPR029993] (1)                                                                                                                                                                                                                                                                                                                                                                                                                                                                                            | -                               | -                            | P_trifoliata_00779_mRNA_11,1    |
| GF0050607 | 0                            | 0                         | 1                            | Hypothetical protein (1)                                              |                                                                                                                                                                                                                                                                                                                                                                                                                                           |                                                                                                                                                                                                                                                                                                                                                                                                                                                                                                                                               | -                               | -                            | P_trifoliata_00779_mRNA_1,1     |
| GF0050606 | 0                            | 0                         | 1                            | Protein AIG1 (1)                                                      | GTP binding [GO:0005525 molecular_function] (1)                                                                                                                                                                                                                                                                                                                                                                                           | AIG1-type guanine nucleotide-binding (G) domain [IPR006703] (1); P-loop containing nucleoside triphosphate hydrolase [IPR027417] (1)                                                                                                                                                                                                                                                                                                                                                                                                          | -                               | -                            | P_trifoliata_00778_mRNA_5,1     |
| GF0050605 | 0                            | 0                         | 1                            | Hypothetical protein (1)                                              |                                                                                                                                                                                                                                                                                                                                                                                                                                           |                                                                                                                                                                                                                                                                                                                                                                                                                                                                                                                                               | -                               | -                            | P_trifoliata_00778_mRNA_3,1     |
| GF0050604 | 0                            | 0                         | 1                            | Hypothetical protein (1)                                              |                                                                                                                                                                                                                                                                                                                                                                                                                                           |                                                                                                                                                                                                                                                                                                                                                                                                                                                                                                                                               | -                               | -                            | P_trifoliata_00777_mRNA_9,1     |
| GF0050603 | 0                            | 0                         | 1                            | Hypothetical protein (1)                                              |                                                                                                                                                                                                                                                                                                                                                                                                                                           |                                                                                                                                                                                                                                                                                                                                                                                                                                                                                                                                               | -                               | -                            | P_trifoliata_00777_mRNA_8,1     |
| GF0050602 | 0                            | 0                         | 1                            | Hypothetical protein (1)                                              |                                                                                                                                                                                                                                                                                                                                                                                                                                           |                                                                                                                                                                                                                                                                                                                                                                                                                                                                                                                                               | -                               | -                            | P_trifoliata_00777_mRNA_7,1     |
| GF0050601 | 0                            | 0                         | 1                            | Hypothetical protein (1)                                              |                                                                                                                                                                                                                                                                                                                                                                                                                                           |                                                                                                                                                                                                                                                                                                                                                                                                                                                                                                                                               | -                               | -                            | P_trifoliata_00777_mRNA_6,1     |
| GF0050600 | 0                            | 0                         | 1                            | Hypothetical protein (1)                                              | nucleic acid binding [GO:0003676 molecular_function] (1)                                                                                                                                                                                                                                                                                                                                                                                  | Ribonuclease H-like domain [IPR012337] (1)                                                                                                                                                                                                                                                                                                                                                                                                                                                                                                    | -                               | -                            | P_trifoliata_00777_mRNA_10,1    |
| GF0050599 | 0                            | 0                         | 1                            | Hypothetical protein (1)                                              |                                                                                                                                                                                                                                                                                                                                                                                                                                           |                                                                                                                                                                                                                                                                                                                                                                                                                                                                                                                                               | -                               | -                            | P_trifoliata_00777_mRNA_1,1     |
| GF0050598 | 0                            | 0                         | 1                            | Hypothetical protein (1)                                              |                                                                                                                                                                                                                                                                                                                                                                                                                                           |                                                                                                                                                                                                                                                                                                                                                                                                                                                                                                                                               | -                               | -                            | P_trifoliata_00776_mRNA_9,1     |
| GF0050597 | 0                            | 0                         | 1                            | Hypothetical protein (1)                                              |                                                                                                                                                                                                                                                                                                                                                                                                                                           |                                                                                                                                                                                                                                                                                                                                                                                                                                                                                                                                               | -                               | -                            | P_trifoliata_00776_mRNA_5,1     |
| GF0050596 | 0                            | 0                         | 1                            | Hypothetical protein (1)                                              |                                                                                                                                                                                                                                                                                                                                                                                                                                           |                                                                                                                                                                                                                                                                                                                                                                                                                                                                                                                                               | -                               | -                            | P_trifoliata_00776_mRNA_4,1     |
| GF0050595 | 0                            | 0                         | 1                            | Hypothetical protein (1)                                              |                                                                                                                                                                                                                                                                                                                                                                                                                                           |                                                                                                                                                                                                                                                                                                                                                                                                                                                                                                                                               | -                               | -                            | P_trifoliata_00776_mRNA_2,1     |
| GF0050594 | 0                            | 0                         | 1                            | Hypothetical protein (1)                                              |                                                                                                                                                                                                                                                                                                                                                                                                                                           |                                                                                                                                                                                                                                                                                                                                                                                                                                                                                                                                               | -                               | -                            | P_trifoliata_00776_mRNA_19,1    |
| GF0050593 | 0                            | 0                         | 1                            | Hypothetical protein (1)                                              | proteolysis [GO:0006508 biological_process] (1); cysteine-type peptidase activity [GO:0008234 molecular_function] (1)                                                                                                                                                                                                                                                                                                                     | Ulp1 protease family, C-terminal catalytic domain [IPR003653] (1)                                                                                                                                                                                                                                                                                                                                                                                                                                                                             | -                               | -                            | P_trifoliata_00776_mRNA_17,1    |
| GF0050592 | 0                            | 0                         | 1                            | Hypothetical protein (1)                                              | aspartic-type endopeptidase activity [GO:0004190 molecular_function] (1); proteolysis [GO:0006508 biological_process] (1)                                                                                                                                                                                                                                                                                                                 | Aspartic peptidase, active site [IPR001969] (1)                                                                                                                                                                                                                                                                                                                                                                                                                                                                                               | -                               | -                            | P_trifoliata_00776_mRNA_16,1    |
| GF0050591 | 0                            | 0                         | 1                            | Hypothetical protein (1)                                              |                                                                                                                                                                                                                                                                                                                                                                                                                                           |                                                                                                                                                                                                                                                                                                                                                                                                                                                                                                                                               | -                               | -                            | P_trifoliata_00776_mRNA_14,1    |
| GF0050590 | 0                            | 0                         | 1                            | Hypothetical protein (1)                                              |                                                                                                                                                                                                                                                                                                                                                                                                                                           |                                                                                                                                                                                                                                                                                                                                                                                                                                                                                                                                               | -                               | -                            | P_trifoliata_00776_mRNA_13,1    |
| GF0050589 | 0                            | 0                         | 1                            | Hypothetical protein (1)                                              |                                                                                                                                                                                                                                                                                                                                                                                                                                           |                                                                                                                                                                                                                                                                                                                                                                                                                                                                                                                                               | -                               | -                            | P_trifoliata_00776_mRNA_11,1    |
| GF0050588 | 0                            | 0                         | 1                            | Hypothetical protein (1)                                              |                                                                                                                                                                                                                                                                                                                                                                                                                                           |                                                                                                                                                                                                                                                                                                                                                                                                                                                                                                                                               | -                               | -                            | P_trifoliata_00776_mRNA_10,1    |
| GF0050587 | 0                            | 0                         | 1                            | Hypothetical protein (1)                                              |                                                                                                                                                                                                                                                                                                                                                                                                                                           |                                                                                                                                                                                                                                                                                                                                                                                                                                                                                                                                               | -                               | -                            | P_trifoliata_00776_mRNA_1,1     |
| GF0050586 | 0                            | 0                         | 1                            | G-type lectin S-receptor-like serine-threonine-protein kinase (1)     | ATP binding [GO:0005524 molecular_function] (1); protein phosphorylation [GO:0006468 biological_process] (1); recognition of pollen [GO:0048544 biological_process] (1); serine-threonine-protein kinase activity [GO:0004672 molecular_function] (1); protein kinase activity [GO:0004672 molecular_function] (1)                                                                                                                        | Protein kinase domain [IPR000719] (1); Protein kinase-like domain [IPR011009] (1); S-receptor-like serine-threonine-protein kinase [IPR024171] (1); Concanavalin A-like lectin/galactanase domain [IPR013320] (1); Serine/threonine-protein kinase, active site [IPR008271] (1); Protein kinase, ATP binding site [IPR017441] (1); Serine/threonine dual specificity protein kinase, catalytic domain [IPR002290] (1); S-locus glycoprotein domain [IPR008058] (1); PAN/Apple domain [IPR003609] (1); Bulb-type lectin domain [IPR001480] (1) | -                               | -                            | P_trifoliata_00775_mRNA_7,1     |
| GF0050585 | 0                            | 0                         | 1                            | S locus glycoprotein (1)                                              | recognition of pollen [GO:0048544 biological_process] (1)                                                                                                                                                                                                                                                                                                                                                                                 | S-locus glycoprotein domain [IPR008058] (1); Bulb-type lectin domain [IPR001480] (1)                                                                                                                                                                                                                                                                                                                                                                                                                                                          | -                               | -                            | P_trifoliata_00775_mRNA_4,1     |
| GF0050584 | 0                            | 0                         | 1                            | Hypothetical protein (1)                                              |                                                                                                                                                                                                                                                                                                                                                                                                                                           |                                                                                                                                                                                                                                                                                                                                                                                                                                                                                                                                               | -                               | -                            | P_trifoliata_00774_mRNA_8,1     |
| GF0050583 | 0                            | 0                         | 1                            | Hypothetical protein (1)                                              |                                                                                                                                                                                                                                                                                                                                                                                                                                           |                                                                                                                                                                                                                                                                                                                                                                                                                                                                                                                                               | -                               | -                            | P_trifoliata_00774_mRNA_5,1     |
| GF0050582 | 0                            | 0                         | 1                            | Hypothetical protein (1)                                              |                                                                                                                                                                                                                                                                                                                                                                                                                                           |                                                                                                                                                                                                                                                                                                                                                                                                                                                                                                                                               | -                               | -                            | P_trifoliata_00774_mRNA_3,1     |
| GF0050581 | 0                            | 0                         | 1                            | Hypothetical protein (1)                                              |                                                                                                                                                                                                                                                                                                                                                                                                                                           |                                                                                                                                                                                                                                                                                                                                                                                                                                                                                                                                               | -                               | -                            | P_trifoliata_00774_mRNA_10,1    |

| ID       | Num. in <i>C. clementiae</i> | Num. in <i>C. canthii</i> | Num. in <i>P. trifoliata</i> | Note                                           | GO                                                                                                                                                                                                                                                                                                                                                                                                                                                            | InterPro                                                                                                                                                                                                                                                | Members in <i>C. clementiae</i> | Members in <i>C. canthii</i> | Members in <i>P. trifoliata</i> |
|----------|------------------------------|---------------------------|------------------------------|------------------------------------------------|---------------------------------------------------------------------------------------------------------------------------------------------------------------------------------------------------------------------------------------------------------------------------------------------------------------------------------------------------------------------------------------------------------------------------------------------------------------|---------------------------------------------------------------------------------------------------------------------------------------------------------------------------------------------------------------------------------------------------------|---------------------------------|------------------------------|---------------------------------|
| GF005080 | 0                            | 0                         | 1                            | Hypothetical protein (1)                       |                                                                                                                                                                                                                                                                                                                                                                                                                                                               |                                                                                                                                                                                                                                                         |                                 |                              | P_trifoliata_00773_mRNA_6,1     |
| GF005079 | 0                            | 0                         | 1                            | Hypothetical protein (1)                       |                                                                                                                                                                                                                                                                                                                                                                                                                                                               |                                                                                                                                                                                                                                                         |                                 |                              | P_trifoliata_00772_mRNA_7,1     |
| GF005078 | 0                            | 0                         | 1                            | Hypothetical protein (1)                       |                                                                                                                                                                                                                                                                                                                                                                                                                                                               |                                                                                                                                                                                                                                                         |                                 |                              | P_trifoliata_00772_mRNA_6,1     |
| GF005077 | 0                            | 0                         | 1                            | Hypothetical protein (1)                       |                                                                                                                                                                                                                                                                                                                                                                                                                                                               |                                                                                                                                                                                                                                                         |                                 |                              | P_trifoliata_00772_mRNA_15,1    |
| GF005076 | 0                            | 0                         | 1                            | Hypothetical protein (1)                       | proton-transporting ATP synthase complex, coupling factor F1o [GO:0045263 cellular_component] (1); proton-transporting two-sector ATPase complex, proton-transporting domain [GO:0033177 cellular_component] (1); hydrogen ion transmembrane transporter activity [GO:0015078 molecular_function] (1); ATP hydrolysis coupled proton transport [GO:0015991 biological_process] (1); ATP synthase coupled proton transport [GO:0015986 biological_process] (1) | ATPase, F0 complex, subunit C, DCCD-binding site [IPR028537] (1); NADH:quinone oxidoreductase/Mrp antiporter, membrane subunit [IPR01750] (1); ATPase, F0 complex, subunit C [IPR004454] (1); V-ATPase proteolipid subunit C-like domain [IPR02379] (1) |                                 | P_trifoliata_00772_mRNA_12,1 |                                 |
| GF005075 | 0                            | 0                         | 1                            | Hypothetical protein (1)                       |                                                                                                                                                                                                                                                                                                                                                                                                                                                               | Exocyst complex component Sec3, C-terminal [IPR019160] (1); Exocyst complex component Sec3, PIP2-binding N-terminal domain [IPR028258] (1)                                                                                                              |                                 |                              | P_trifoliata_00772_mRNA_10,1    |
| GF005074 | 0                            | 0                         | 1                            | Hypothetical protein (1)                       |                                                                                                                                                                                                                                                                                                                                                                                                                                                               |                                                                                                                                                                                                                                                         |                                 |                              | P_trifoliata_00772_mRNA_1,1     |
| GF005073 | 0                            | 0                         | 1                            | Hypothetical protein (1)                       |                                                                                                                                                                                                                                                                                                                                                                                                                                                               |                                                                                                                                                                                                                                                         |                                 |                              | P_trifoliata_00771_mRNA_8,1     |
| GF005072 | 0                            | 0                         | 1                            | Hypothetical protein (1)                       | RNA binding [GO:0003723 molecular_function] (1); ribonuclease T2 activity [GO:0033897 molecular_function] (1)                                                                                                                                                                                                                                                                                                                                                 | Ribonuclease T2-like [IPR01568] (1)                                                                                                                                                                                                                     |                                 |                              | P_trifoliata_00771_mRNA_6,1     |
| GF005071 | 0                            | 0                         | 1                            | Hypothetical protein (1)                       |                                                                                                                                                                                                                                                                                                                                                                                                                                                               | Domain of unknown function DUF4219 [IPR05314] (1)                                                                                                                                                                                                       |                                 |                              | P_trifoliata_00771_mRNA_5,1     |
| GF005070 | 0                            | 0                         | 1                            | Hypothetical protein (1)                       |                                                                                                                                                                                                                                                                                                                                                                                                                                                               |                                                                                                                                                                                                                                                         |                                 |                              | P_trifoliata_00771_mRNA_4,1     |
| GF005069 | 0                            | 0                         | 1                            | Hypothetical protein (1)                       |                                                                                                                                                                                                                                                                                                                                                                                                                                                               |                                                                                                                                                                                                                                                         |                                 |                              | P_trifoliata_00771_mRNA_3,1     |
| GF005068 | 0                            | 0                         | 1                            | Hypothetical protein (1)                       |                                                                                                                                                                                                                                                                                                                                                                                                                                                               |                                                                                                                                                                                                                                                         |                                 |                              | P_trifoliata_00770_mRNA_6,1     |
| GF005067 | 0                            | 0                         | 1                            | Hypothetical protein (1)                       |                                                                                                                                                                                                                                                                                                                                                                                                                                                               |                                                                                                                                                                                                                                                         |                                 |                              | P_trifoliata_00770_mRNA_5,1     |
| GF005066 | 0                            | 0                         | 1                            | Putative muDR family transposase-like (1)      | zinc ion binding [GO:0008270 molecular_function] (1)                                                                                                                                                                                                                                                                                                                                                                                                          | Zinc finger, SWIM-type [IPR007527] (1); Transposase, MuDR, plant [IPR04332] (1)                                                                                                                                                                         |                                 |                              | P_trifoliata_00770_mRNA_1,1     |
| GF005065 | 0                            | 0                         | 1                            | Hypothetical protein (1)                       |                                                                                                                                                                                                                                                                                                                                                                                                                                                               |                                                                                                                                                                                                                                                         |                                 |                              | P_trifoliata_00769_mRNA_7,1     |
| GF005064 | 0                            | 0                         | 1                            | Hypothetical protein (1)                       |                                                                                                                                                                                                                                                                                                                                                                                                                                                               |                                                                                                                                                                                                                                                         |                                 |                              | P_trifoliata_00769_mRNA_1,1     |
| GF005063 | 0                            | 0                         | 1                            | Hypothetical protein (1)                       | protein binding [GO:0005515 molecular_function] (1); ADP binding [GO:0045531 molecular_function] (1)                                                                                                                                                                                                                                                                                                                                                          | Ankyrin repeat [IPR002110] (1); PGD domain [IPR026961] (1); P-loop containing nucleoside triphosphate hydrolase [IPR027417] (1); Ankyrin repeat-containing domain [IPR026683] (1); NB-ARC [IPR02182] (1)                                                |                                 |                              | P_trifoliata_00768_mRNA_9,1     |
| GF005062 | 0                            | 0                         | 1                            | Hypothetical protein (1)                       | enzyme inhibitor activity [GO:0004857 molecular_function] (1)                                                                                                                                                                                                                                                                                                                                                                                                 | Pectinesterase inhibitor domain [IPR06501] (1)                                                                                                                                                                                                          |                                 |                              | P_trifoliata_00768_mRNA_10,1    |
| GF005061 | 0                            | 0                         | 1                            | Gag protease polyprotein (1)                   | nucleic acid binding [GO:0003676 molecular_function] (1); zinc ion binding [GO:0008270 molecular_function] (1)                                                                                                                                                                                                                                                                                                                                                | Zinc finger, CCHC-type [IPR01878] (1)                                                                                                                                                                                                                   |                                 |                              | P_trifoliata_00767_mRNA_6,1     |
| GF005060 | 0                            | 0                         | 1                            | Hypothetical protein (1)                       |                                                                                                                                                                                                                                                                                                                                                                                                                                                               |                                                                                                                                                                                                                                                         |                                 |                              | P_trifoliata_00767_mRNA_5,1     |
| GF005059 | 0                            | 0                         | 1                            | Hypothetical protein (1)                       |                                                                                                                                                                                                                                                                                                                                                                                                                                                               |                                                                                                                                                                                                                                                         |                                 |                              | P_trifoliata_00767_mRNA_4,1     |
| GF005058 | 0                            | 0                         | 1                            | Gag protease polyprotein (1)                   |                                                                                                                                                                                                                                                                                                                                                                                                                                                               | Retrosposon gag domain [IPR05162] (1)                                                                                                                                                                                                                   |                                 |                              | P_trifoliata_00767_mRNA_1,1     |
| GF005057 | 0                            | 0                         | 1                            | Hypothetical protein (1)                       |                                                                                                                                                                                                                                                                                                                                                                                                                                                               |                                                                                                                                                                                                                                                         |                                 |                              | P_trifoliata_00766_mRNA_6,1     |
| GF005056 | 0                            | 0                         | 1                            | Hypothetical protein (1)                       |                                                                                                                                                                                                                                                                                                                                                                                                                                                               |                                                                                                                                                                                                                                                         |                                 |                              | P_trifoliata_00766_mRNA_5,1     |
| GF005055 | 0                            | 0                         | 1                            | Hypothetical protein (1)                       |                                                                                                                                                                                                                                                                                                                                                                                                                                                               |                                                                                                                                                                                                                                                         |                                 |                              | P_trifoliata_00766_mRNA_4,1     |
| GF005054 | 0                            | 0                         | 1                            | Hypothetical protein (1)                       |                                                                                                                                                                                                                                                                                                                                                                                                                                                               |                                                                                                                                                                                                                                                         |                                 |                              | P_trifoliata_00766_mRNA_3,1     |
| GF005053 | 0                            | 0                         | 1                            | Essential protein Yae1, putative isoform 3 (1) |                                                                                                                                                                                                                                                                                                                                                                                                                                                               |                                                                                                                                                                                                                                                         |                                 |                              | P_trifoliata_00766_mRNA_2,1     |
| GF005052 | 0                            | 0                         | 1                            | Hypothetical protein (1)                       |                                                                                                                                                                                                                                                                                                                                                                                                                                                               |                                                                                                                                                                                                                                                         |                                 |                              | P_trifoliata_00765_mRNA_2,1     |
| GF005051 | 0                            | 0                         | 1                            | Hypothetical protein (1)                       |                                                                                                                                                                                                                                                                                                                                                                                                                                                               |                                                                                                                                                                                                                                                         |                                 |                              | P_trifoliata_00764_mRNA_7,1     |
| GF005050 | 0                            | 0                         | 1                            | Hypothetical protein (1)                       |                                                                                                                                                                                                                                                                                                                                                                                                                                                               |                                                                                                                                                                                                                                                         |                                 |                              | P_trifoliata_00764_mRNA_6,1     |
| GF005049 | 0                            | 0                         | 1                            | Nuclear pore complex Nup98-Nup96 (1)           |                                                                                                                                                                                                                                                                                                                                                                                                                                                               |                                                                                                                                                                                                                                                         |                                 |                              | P_trifoliata_00764_mRNA_5,1     |
| GF005048 | 0                            | 0                         | 1                            | Hypothetical protein (1)                       |                                                                                                                                                                                                                                                                                                                                                                                                                                                               |                                                                                                                                                                                                                                                         |                                 |                              | P_trifoliata_00764_mRNA_3,1     |
| GF005047 | 0                            | 0                         | 1                            | Hypothetical protein (1)                       | regulation of transcription, DNA-templated [GO:0006355 biological_process] (1); DNA binding [GO:0003677 molecular_function] (1)                                                                                                                                                                                                                                                                                                                               | Probable transposase, Pta/Ea/Spm, plant [IPR004252] (1); NAC domain [IPR003441] (1)                                                                                                                                                                     |                                 |                              | P_trifoliata_00764_mRNA_2,1     |
| GF005046 | 0                            | 0                         | 1                            | Hypothetical protein (1)                       |                                                                                                                                                                                                                                                                                                                                                                                                                                                               |                                                                                                                                                                                                                                                         |                                 |                              | P_trifoliata_00764_mRNA_12,1    |
| GF005045 | 0                            | 0                         | 1                            | Caffeic acid O-methyltransferase (1)           | methyltransferase activity [GO:0008168 molecular_function] (1); O-methyltransferase activity [GO:0008171 molecular_function] (1)                                                                                                                                                                                                                                                                                                                              | S-adenosyl-L-methionine-dependent methyltransferase [IPR029063] (1); Winged helix-helix DNA-binding domain [IPR019911] (1); O-methyltransferase, family 2 [IPR01077] (1); O-methyltransferase COMT-type [IPR016461] (1)                                 |                                 |                              | P_trifoliata_00764_mRNA_11,1    |
| GF005044 | 0                            | 0                         | 1                            | Hypothetical protein (1)                       |                                                                                                                                                                                                                                                                                                                                                                                                                                                               |                                                                                                                                                                                                                                                         |                                 |                              | P_trifoliata_00764_mRNA_10,1    |
| GF005043 | 0                            | 0                         | 1                            | Hypothetical protein (1)                       | hydrolase activity, acting on carbon-nitrogen (but not peptide) bonds [GO:0016810 molecular_function] (1); nitrogen compound metabolic process [GO:0006807 biological_process] (1)                                                                                                                                                                                                                                                                            | Nitrilase/cyanide hydratase, conserved site [IPR001325] (1); Carbon-nitrogen hydrolase [IPR003010] (1)                                                                                                                                                  |                                 |                              | P_trifoliata_00764_mRNA_1,1     |
| GF005042 | 0                            | 0                         | 1                            | Hypothetical protein (1)                       |                                                                                                                                                                                                                                                                                                                                                                                                                                                               |                                                                                                                                                                                                                                                         |                                 |                              | P_trifoliata_00763_mRNA_7,1     |
| GF005041 | 0                            | 0                         | 1                            | Hypothetical protein (1)                       |                                                                                                                                                                                                                                                                                                                                                                                                                                                               |                                                                                                                                                                                                                                                         |                                 |                              | P_trifoliata_00763_mRNA_2,1     |
| GF005040 | 0                            | 0                         | 1                            | Hypothetical protein (1)                       |                                                                                                                                                                                                                                                                                                                                                                                                                                                               |                                                                                                                                                                                                                                                         |                                 |                              | P_trifoliata_00763_mRNA_1,1     |
| GF005039 | 0                            | 0                         | 1                            | Hypothetical protein (1)                       |                                                                                                                                                                                                                                                                                                                                                                                                                                                               |                                                                                                                                                                                                                                                         |                                 |                              | P_trifoliata_00762_mRNA_6,1     |
| GF005038 | 0                            | 0                         | 1                            | Hypothetical protein (1)                       |                                                                                                                                                                                                                                                                                                                                                                                                                                                               |                                                                                                                                                                                                                                                         |                                 |                              | P_trifoliata_00761_mRNA_8,1     |
| GF005037 | 0                            | 0                         | 1                            | Hypothetical protein (1)                       |                                                                                                                                                                                                                                                                                                                                                                                                                                                               |                                                                                                                                                                                                                                                         |                                 |                              | P_trifoliata_00761_mRNA_7,1     |
| GF005036 | 0                            | 0                         | 1                            | Hypothetical protein (1)                       |                                                                                                                                                                                                                                                                                                                                                                                                                                                               |                                                                                                                                                                                                                                                         |                                 |                              | P_trifoliata_00761_mRNA_6,1     |
| GF005035 | 0                            | 0                         | 1                            | Hypothetical protein (1)                       |                                                                                                                                                                                                                                                                                                                                                                                                                                                               | Arabidopsis retrotransposon Orf1 [IPR004312] (1)                                                                                                                                                                                                        |                                 |                              | P_trifoliata_00761_mRNA_5,1     |
| GF005034 | 0                            | 0                         | 1                            | Hypothetical protein (1)                       |                                                                                                                                                                                                                                                                                                                                                                                                                                                               |                                                                                                                                                                                                                                                         |                                 |                              | P_trifoliata_00761_mRNA_4,1     |
| GF005033 | 0                            | 0                         | 1                            | Hypothetical protein (1)                       | nucleic acid binding [GO:0003676 molecular_function] (1)                                                                                                                                                                                                                                                                                                                                                                                                      | Histidine kinase-like ATPase, C-terminal domain [IPR00594] (1); Ribonuclease H-like domain [IPR012337] (1)                                                                                                                                              |                                 |                              | P_trifoliata_00761_mRNA_3,1     |
| GF005032 | 0                            | 0                         | 1                            | Hypothetical protein (1)                       |                                                                                                                                                                                                                                                                                                                                                                                                                                                               |                                                                                                                                                                                                                                                         |                                 |                              | P_trifoliata_00761_mRNA_2,1     |
| GF005031 | 0                            | 0                         | 1                            | Hypothetical protein (1)                       |                                                                                                                                                                                                                                                                                                                                                                                                                                                               |                                                                                                                                                                                                                                                         |                                 |                              | P_trifoliata_00761_mRNA_1,1     |
| GF005030 | 0                            | 0                         | 1                            | Hypothetical protein (1)                       | cysteine-type peptidase activity [GO:0008234 molecular_function] (1); proteolysis [GO:0006508 biological_process] (1)                                                                                                                                                                                                                                                                                                                                         | Viral movement protein [IPR028919] (1); U3i3 protease family, C-terminal catalytic domain [IPR03653] (1)                                                                                                                                                |                                 |                              | P_trifoliata_00760_mRNA_9,1     |
| GF005029 | 0                            | 0                         | 1                            | Hypothetical protein (1)                       |                                                                                                                                                                                                                                                                                                                                                                                                                                                               |                                                                                                                                                                                                                                                         |                                 |                              | P_trifoliata_00760_mRNA_7,1     |
| GF005028 | 0                            | 0                         | 1                            | Hypothetical protein (1)                       |                                                                                                                                                                                                                                                                                                                                                                                                                                                               |                                                                                                                                                                                                                                                         |                                 |                              | P_trifoliata_00760_mRNA_5,1     |
| GF005027 | 0                            | 0                         | 1                            | Hypothetical protein (1)                       |                                                                                                                                                                                                                                                                                                                                                                                                                                                               |                                                                                                                                                                                                                                                         |                                 |                              | P_trifoliata_00760_mRNA_4,1     |
| GF005026 | 0                            | 0                         | 1                            | Hypothetical protein (1)                       |                                                                                                                                                                                                                                                                                                                                                                                                                                                               |                                                                                                                                                                                                                                                         |                                 |                              | P_trifoliata_00760_mRNA_3,1     |
| GF005025 | 0                            | 0                         | 1                            | Hypothetical protein (1)                       |                                                                                                                                                                                                                                                                                                                                                                                                                                                               |                                                                                                                                                                                                                                                         |                                 |                              | P_trifoliata_00760_mRNA_2,1     |
| GF005024 | 0                            | 0                         | 1                            | Hypothetical protein (1)                       |                                                                                                                                                                                                                                                                                                                                                                                                                                                               |                                                                                                                                                                                                                                                         |                                 |                              | P_trifoliata_00760_mRNA_16,1    |
| GF005023 | 0                            | 0                         | 1                            | Hypothetical protein (1)                       |                                                                                                                                                                                                                                                                                                                                                                                                                                                               | Domain of unknown function DUF4218 [IPR025452] (1)                                                                                                                                                                                                      |                                 |                              | P_trifoliata_00760_mRNA_15,1    |
| GF005022 | 0                            | 0                         | 1                            | Hypothetical protein (1)                       |                                                                                                                                                                                                                                                                                                                                                                                                                                                               |                                                                                                                                                                                                                                                         |                                 |                              | P_trifoliata_00760_mRNA_14,1    |
| GF005021 | 0                            | 0                         | 1                            | Hypothetical protein (1)                       |                                                                                                                                                                                                                                                                                                                                                                                                                                                               |                                                                                                                                                                                                                                                         |                                 |                              | P_trifoliata_00760_mRNA_11,1    |
| GF005020 | 0                            | 0                         | 1                            | Hypothetical protein (1)                       |                                                                                                                                                                                                                                                                                                                                                                                                                                                               |                                                                                                                                                                                                                                                         |                                 |                              | P_trifoliata_00758_mRNA_4,1     |
| GF005019 | 0                            | 0                         | 1                            | Hypothetical protein (1)                       |                                                                                                                                                                                                                                                                                                                                                                                                                                                               |                                                                                                                                                                                                                                                         |                                 |                              | P_trifoliata_00758_mRNA_2,1     |
| GF005018 | 0                            | 0                         | 1                            | Hypothetical protein (1)                       |                                                                                                                                                                                                                                                                                                                                                                                                                                                               |                                                                                                                                                                                                                                                         |                                 |                              | P_trifoliata_00758_mRNA_1,1     |
| GF005017 | 0                            | 0                         | 1                            | Hypothetical protein (1)                       |                                                                                                                                                                                                                                                                                                                                                                                                                                                               |                                                                                                                                                                                                                                                         |                                 |                              | P_trifoliata_00757_mRNA_8,1     |
| GF005016 | 0                            | 0                         | 1                            | Hypothetical protein (1)                       |                                                                                                                                                                                                                                                                                                                                                                                                                                                               | Leucine-rich repeat domain, L domain-like [IPR032675] (1)                                                                                                                                                                                               |                                 |                              | P_trifoliata_00757_mRNA_6,1     |
| GF005015 | 0                            | 0                         | 1                            | Hypothetical protein (1)                       |                                                                                                                                                                                                                                                                                                                                                                                                                                                               | Leucine-rich repeat domain, L domain-like [IPR032675] (1)                                                                                                                                                                                               |                                 |                              | P_trifoliata_00757_mRNA_2,1     |
| GF005014 | 0                            | 0                         | 1                            | Hypothetical protein (1)                       |                                                                                                                                                                                                                                                                                                                                                                                                                                                               |                                                                                                                                                                                                                                                         |                                 |                              | P_trifoliata_00757_mRNA_10,1    |
| GF005013 | 0                            | 0                         | 1                            | Hypothetical protein (1)                       |                                                                                                                                                                                                                                                                                                                                                                                                                                                               |                                                                                                                                                                                                                                                         |                                 |                              | P_trifoliata_00756_mRNA_8,1     |
| GF005012 | 0                            | 0                         | 1                            | Hypothetical protein (1)                       |                                                                                                                                                                                                                                                                                                                                                                                                                                                               | Leucine-rich repeat domain, L domain-like [IPR032675] (1)                                                                                                                                                                                               |                                 |                              | P_trifoliata_00756_mRNA_6,1     |
| GF005011 | 0                            | 0                         | 1                            | Hypothetical protein (1)                       |                                                                                                                                                                                                                                                                                                                                                                                                                                                               | Leucine-rich repeat domain, L domain-like [IPR032675] (1)                                                                                                                                                                                               |                                 |                              | P_trifoliata_00756_mRNA_5,1     |
| GF005010 | 0                            | 0                         | 1                            | Hypothetical protein (1)                       |                                                                                                                                                                                                                                                                                                                                                                                                                                                               |                                                                                                                                                                                                                                                         |                                 |                              | P_trifoliata_00756_mRNA_4,1     |
| GF005009 | 0                            | 0                         | 1                            | Hypothetical protein (1)                       |                                                                                                                                                                                                                                                                                                                                                                                                                                                               | Leucine-rich repeat domain, L domain-like [IPR032675] (1)                                                                                                                                                                                               |                                 |                              | P_trifoliata_00756_mRNA_3,1     |
| GF005008 | 0                            | 0                         | 1                            | Hypothetical protein (1)                       |                                                                                                                                                                                                                                                                                                                                                                                                                                                               |                                                                                                                                                                                                                                                         |                                 |                              | P_trifoliata_00755_mRNA_8,1     |
| GF005007 | 0                            | 0                         | 1                            | Hypothetical protein (1)                       |                                                                                                                                                                                                                                                                                                                                                                                                                                                               | Probable transposase, Pta/Ea/Spm, plant [IPR004252] (1)                                                                                                                                                                                                 |                                 |                              | P_trifoliata_00755_mRNA_6,1     |
| GF005006 | 0                            | 0                         | 1                            | Hypothetical protein (1)                       |                                                                                                                                                                                                                                                                                                                                                                                                                                                               |                                                                                                                                                                                                                                                         |                                 |                              | P_trifoliata_00755_mRNA_2,1     |
| GF005005 | 0                            | 0                         | 1                            | (+)-germacrene D synthase (1)                  | terpene synthase activity [GO:0010333 molecular_function] (1); lyase activity [GO:0016829 molecular_function] (1); magnesium ion binding [GO:0000267 molecular_function] (1); metabolic process [GO:0008152 biological_process] (1)                                                                                                                                                                                                                           | Isoprenoid synthase domain [IPR008949] (1); Terpenoid cyclases/protein prenyltransferase alpha-alpha toroid [IPR008930] (1); Terpene synthase, metal-binding domain [IPR005630] (1); Terpene synthase, N-terminal domain [IPR001906] (1)                |                                 |                              | P_trifoliata_00755_mRNA_1,1     |
| GF005004 | 0                            | 0                         | 1                            | Hypothetical protein (1)                       |                                                                                                                                                                                                                                                                                                                                                                                                                                                               |                                                                                                                                                                                                                                                         |                                 |                              | P_trifoliata_00754_mRNA_4,1     |



| ID        | Num. in <i>C. caryophyllae</i> | Num. in <i>C. umbilo</i> | Num. in <i>P. trifoliata</i> | Note                                                                                                                  | GO                                                                                                                                                                                                                                                                                                        | InterPro                                                                                                                                                                                          | Members in <i>C. caryophyllae</i> | Members in <i>C. umbilo</i> | Members in <i>P. trifoliata</i> |
|-----------|--------------------------------|--------------------------|------------------------------|-----------------------------------------------------------------------------------------------------------------------|-----------------------------------------------------------------------------------------------------------------------------------------------------------------------------------------------------------------------------------------------------------------------------------------------------------|---------------------------------------------------------------------------------------------------------------------------------------------------------------------------------------------------|-----------------------------------|-----------------------------|---------------------------------|
| GF0050503 | 0                              | 0                        | 1                            | RNA-directed DNA polymerase (Reverse transcriptase), Polynucleotide transferase, Ribonuclease H fold-like protein (1) |                                                                                                                                                                                                                                                                                                           | Reverse transcriptase zinc-binding domain [IPRO29600] (1); Chromo domain [IPRO2780] (1); Chromo domain-like [IPRO16197] (1)                                                                       | -                                 | -                           | P_trifoliata_00753_mRNA_7,1     |
| GF0050502 | 0                              | 0                        | 1                            | Hypothetical protein (1)                                                                                              |                                                                                                                                                                                                                                                                                                           |                                                                                                                                                                                                   | -                                 | -                           | P_trifoliata_00753_mRNA_6,1     |
| GF0050501 | 0                              | 0                        | 1                            | Hypothetical protein (1)                                                                                              |                                                                                                                                                                                                                                                                                                           |                                                                                                                                                                                                   | -                                 | -                           | P_trifoliata_00753_mRNA_5,1     |
| GF0050500 | 0                              | 0                        | 1                            | Hypothetical protein (1)                                                                                              |                                                                                                                                                                                                                                                                                                           |                                                                                                                                                                                                   | -                                 | -                           | P_trifoliata_00753_mRNA_3,1     |
| GF0050499 | 0                              | 0                        | 1                            | Hypothetical protein (1)                                                                                              |                                                                                                                                                                                                                                                                                                           | Reverse transcriptase zinc-binding domain [IPRO29600] (1)                                                                                                                                         | -                                 | -                           | P_trifoliata_00753_mRNA_2,1     |
| GF0050498 | 0                              | 0                        | 1                            | Hypothetical protein (1)                                                                                              | exocytosis [GO:0006887] biological_process (1); exocyst [GO:000145 cellular_component] (1)                                                                                                                                                                                                                | Exocyst complex component Sec5 [IPRO10326] (1)                                                                                                                                                    | -                                 | -                           | P_trifoliata_00752_mRNA_17,1    |
| GF0050497 | 0                              | 0                        | 1                            | Hypothetical protein (1)                                                                                              | nucleic acid binding [GO:0003676 molecular_function] (1)                                                                                                                                                                                                                                                  | Ribonuclease H-like domain [IPRO12337] (1)                                                                                                                                                        | -                                 | -                           | P_trifoliata_00752_mRNA_16,1    |
| GF0050496 | 0                              | 0                        | 1                            | Hypothetical protein (1)                                                                                              | nucleic acid binding [GO:0003676 molecular_function] (1)                                                                                                                                                                                                                                                  | Ribonuclease H-like domain [IPRO12337] (1)                                                                                                                                                        | -                                 | -                           | P_trifoliata_00752_mRNA_15,1    |
| GF0050495 | 0                              | 0                        | 1                            | Disease resistance protein RPSS, putative (1)                                                                         | ADP binding [GO:0043531 molecular_function] (1)                                                                                                                                                                                                                                                           | P-loop containing nucleoside triphosphate hydrolase [IPRO27417] (1); NB-ARC [IPRO02182] (1); Leucine-rich repeat domain, L domain-like [IPRO95767] (1)                                            | -                                 | -                           | P_trifoliata_00752_mRNA_1,1     |
| GF0050494 | 0                              | 0                        | 1                            | Hypothetical protein (1)                                                                                              |                                                                                                                                                                                                                                                                                                           |                                                                                                                                                                                                   | -                                 | -                           | P_trifoliata_00751_mRNA_9,1     |
| GF0050493 | 0                              | 0                        | 1                            | Hypothetical protein (1)                                                                                              |                                                                                                                                                                                                                                                                                                           |                                                                                                                                                                                                   | -                                 | -                           | P_trifoliata_00751_mRNA_6,1     |
| GF0050492 | 0                              | 0                        | 1                            | Mo25 family protein (1)                                                                                               | binding [GO:0005488 molecular_function] (1)                                                                                                                                                                                                                                                               | Armadillo-type fold [IPRO16024] (1); Mo25-like [IPRO13378] (1); Armadillo-like helical [IPRO11989] (1)                                                                                            | -                                 | -                           | P_trifoliata_00751_mRNA_5,1     |
| GF0050491 | 0                              | 0                        | 1                            | Hypothetical protein (1)                                                                                              |                                                                                                                                                                                                                                                                                                           |                                                                                                                                                                                                   | -                                 | -                           | P_trifoliata_00751_mRNA_12,1    |
| GF0050490 | 0                              | 0                        | 1                            | Hypothetical protein (1)                                                                                              |                                                                                                                                                                                                                                                                                                           |                                                                                                                                                                                                   | -                                 | -                           | P_trifoliata_00750_mRNA_11,1    |
| GF0050489 | 0                              | 0                        | 1                            | Hypothetical protein (1)                                                                                              |                                                                                                                                                                                                                                                                                                           |                                                                                                                                                                                                   | -                                 | -                           | P_trifoliata_00750_mRNA_1,1     |
| GF0050488 | 0                              | 0                        | 1                            | Hypothetical protein (1)                                                                                              | mitochondrion [GO:0005739 cellular_component] (1); mitochondrial respiratory chain complex I [GO:0005747 cellular_component] (1); electron transport chain [GO:0022900 biological_process] (1)                                                                                                            | NADH dehydrogenase [ubiquinone] 1 beta subcomplex subunit 3 [IPRO12576] (1)                                                                                                                       | -                                 | -                           | P_trifoliata_00749_mRNA_4,1     |
| GF0050487 | 0                              | 0                        | 1                            | Hypothetical protein (1)                                                                                              |                                                                                                                                                                                                                                                                                                           |                                                                                                                                                                                                   | -                                 | -                           | P_trifoliata_00749_mRNA_3,1     |
| GF0050486 | 0                              | 0                        | 1                            | Putative transmembrane 9 superfamily member 3-like (1)                                                                | integral component of membrane [GO:0016021 cellular_component] (1)                                                                                                                                                                                                                                        | Nonspanin (TM9SF) [IPRO04240] (1); Major facilitator superfamily domain [IPRO20846] (1)                                                                                                           | -                                 | -                           | P_trifoliata_00749_mRNA_2,1     |
| GF0050485 | 0                              | 0                        | 1                            | Hypothetical protein (1)                                                                                              |                                                                                                                                                                                                                                                                                                           |                                                                                                                                                                                                   | -                                 | -                           | P_trifoliata_00749_mRNA_12,1    |
| GF0050484 | 0                              | 0                        | 1                            | Transmembrane 9 superfamily member 3-like protein (1)                                                                 | integral component of membrane [GO:0016021 cellular_component] (1)                                                                                                                                                                                                                                        | Nonspanin (TM9SF) [IPRO04240] (1)                                                                                                                                                                 | -                                 | -                           | P_trifoliata_00749_mRNA_1,1     |
| GF0050483 | 0                              | 0                        | 1                            | Hypothetical protein (1)                                                                                              |                                                                                                                                                                                                                                                                                                           |                                                                                                                                                                                                   | -                                 | -                           | P_trifoliata_00748_mRNA_8,1     |
| GF0050482 | 0                              | 0                        | 1                            | Hypothetical protein (1)                                                                                              |                                                                                                                                                                                                                                                                                                           |                                                                                                                                                                                                   | -                                 | -                           | P_trifoliata_00748_mRNA_7,1     |
| GF0050481 | 0                              | 0                        | 1                            | Hypothetical protein (1)                                                                                              |                                                                                                                                                                                                                                                                                                           |                                                                                                                                                                                                   | -                                 | -                           | P_trifoliata_00748_mRNA_5,1     |
| GF0050480 | 0                              | 0                        | 1                            | Hypothetical protein (1)                                                                                              |                                                                                                                                                                                                                                                                                                           |                                                                                                                                                                                                   | -                                 | -                           | P_trifoliata_00748_mRNA_3,1     |
| GF0050479 | 0                              | 0                        | 1                            | Hypothetical protein (1)                                                                                              |                                                                                                                                                                                                                                                                                                           |                                                                                                                                                                                                   | -                                 | -                           | P_trifoliata_00747_mRNA_9,1     |
| GF0050478 | 0                              | 0                        | 1                            | Hypothetical protein (1)                                                                                              |                                                                                                                                                                                                                                                                                                           |                                                                                                                                                                                                   | -                                 | -                           | P_trifoliata_00746_mRNA_9,1     |
| GF0050477 | 0                              | 0                        | 1                            | Hypothetical protein (1)                                                                                              | oxidoreductase activity [GO:0016491 molecular_function] (1); oxidation-reduction process [GO:0055114 biological_process] (1); oxidoreductase activity, acting on CH-OH group of donors [GO:0016614 molecular_function] (1)                                                                                | Glucose-methanol-choline oxidoreductase, C-terminal [IPRO07867] (1); FAD(NADP)-binding domain [IPRO23753] (1)                                                                                     | -                                 | -                           | P_trifoliata_00746_mRNA_8,1     |
| GF0050476 | 0                              | 0                        | 1                            | Hypothetical protein (1)                                                                                              |                                                                                                                                                                                                                                                                                                           |                                                                                                                                                                                                   | -                                 | -                           | P_trifoliata_00746_mRNA_7,1     |
| GF0050475 | 0                              | 0                        | 1                            | Hypothetical protein (1)                                                                                              |                                                                                                                                                                                                                                                                                                           |                                                                                                                                                                                                   | -                                 | -                           | P_trifoliata_00746_mRNA_5,1     |
| GF0050474 | 0                              | 0                        | 1                            | Hypothetical protein (1)                                                                                              |                                                                                                                                                                                                                                                                                                           |                                                                                                                                                                                                   | -                                 | -                           | P_trifoliata_00746_mRNA_3,1     |
| GF0050473 | 0                              | 0                        | 1                            | Hypothetical protein (1)                                                                                              |                                                                                                                                                                                                                                                                                                           |                                                                                                                                                                                                   | -                                 | -                           | P_trifoliata_00746_mRNA_23,1    |
| GF0050472 | 0                              | 0                        | 1                            | Hypothetical protein (1)                                                                                              |                                                                                                                                                                                                                                                                                                           |                                                                                                                                                                                                   | -                                 | -                           | P_trifoliata_00746_mRNA_22,1    |
| GF0050471 | 0                              | 0                        | 1                            | Hypothetical protein (1)                                                                                              |                                                                                                                                                                                                                                                                                                           |                                                                                                                                                                                                   | -                                 | -                           | P_trifoliata_00746_mRNA_21,1    |
| GF0050470 | 0                              | 0                        | 1                            | Hypothetical protein (1)                                                                                              |                                                                                                                                                                                                                                                                                                           |                                                                                                                                                                                                   | -                                 | -                           | P_trifoliata_00746_mRNA_20,1    |
| GF0050469 | 0                              | 0                        | 1                            | Hypothetical protein (1)                                                                                              |                                                                                                                                                                                                                                                                                                           |                                                                                                                                                                                                   | -                                 | -                           | P_trifoliata_00746_mRNA_2,1     |
| GF0050468 | 0                              | 0                        | 1                            | Hypothetical protein (1)                                                                                              |                                                                                                                                                                                                                                                                                                           |                                                                                                                                                                                                   | -                                 | -                           | P_trifoliata_00746_mRNA_17,1    |
| GF0050467 | 0                              | 0                        | 1                            | Hypothetical protein (1)                                                                                              |                                                                                                                                                                                                                                                                                                           |                                                                                                                                                                                                   | -                                 | -                           | P_trifoliata_00746_mRNA_16,1    |
| GF0050466 | 0                              | 0                        | 1                            | Hypothetical protein (1)                                                                                              |                                                                                                                                                                                                                                                                                                           |                                                                                                                                                                                                   | -                                 | -                           | P_trifoliata_00746_mRNA_15,1    |
| GF0050465 | 0                              | 0                        | 1                            | Hypothetical protein (1)                                                                                              |                                                                                                                                                                                                                                                                                                           |                                                                                                                                                                                                   | -                                 | -                           | P_trifoliata_00746_mRNA_13,1    |
| GF0050464 | 0                              | 0                        | 1                            | Hypothetical protein (1)                                                                                              |                                                                                                                                                                                                                                                                                                           |                                                                                                                                                                                                   | -                                 | -                           | P_trifoliata_00746_mRNA_12,1    |
| GF0050463 | 0                              | 0                        | 1                            | Hypothetical protein (1)                                                                                              |                                                                                                                                                                                                                                                                                                           |                                                                                                                                                                                                   | -                                 | -                           | P_trifoliata_00746_mRNA_11,1    |
| GF0050462 | 0                              | 0                        | 1                            | Hypothetical protein (1)                                                                                              |                                                                                                                                                                                                                                                                                                           |                                                                                                                                                                                                   | -                                 | -                           | P_trifoliata_00746_mRNA_10,1    |
| GF0050461 | 0                              | 0                        | 1                            | CcmC (1)                                                                                                              | heme transporter activity [GO:0015232 molecular_function] (1); heme binding [GO:0020037 molecular_function] (1); heme transport [GO:0005886 biological_process] (1); membrane [GO:0016020 cellular_component] (1); cytochrome complex assembly [GO:0017004 biological_process] (1)                        | Cytochrome c-type biogenesis protein CcmC [IPRO03571] (1); Cytochrome c assembly protein [IPRO02541] (1)                                                                                          | -                                 | -                           | P_trifoliata_00746_mRNA_1,1     |
| GF0050460 | 0                              | 0                        | 1                            | Hypothetical protein (1)                                                                                              |                                                                                                                                                                                                                                                                                                           |                                                                                                                                                                                                   | -                                 | -                           | P_trifoliata_00745_mRNA_9,1     |
| GF0050459 | 0                              | 0                        | 1                            | Hypothetical protein (1)                                                                                              |                                                                                                                                                                                                                                                                                                           |                                                                                                                                                                                                   | -                                 | -                           | P_trifoliata_00745_mRNA_7,1     |
| GF0050458 | 0                              | 0                        | 1                            | Hypothetical protein (1)                                                                                              |                                                                                                                                                                                                                                                                                                           |                                                                                                                                                                                                   | -                                 | -                           | P_trifoliata_00745_mRNA_5,1     |
| GF0050457 | 0                              | 0                        | 1                            | Hypothetical protein (1)                                                                                              |                                                                                                                                                                                                                                                                                                           |                                                                                                                                                                                                   | -                                 | -                           | P_trifoliata_00745_mRNA_4,1     |
| GF0050456 | 0                              | 0                        | 1                            | Hypothetical protein (1)                                                                                              |                                                                                                                                                                                                                                                                                                           |                                                                                                                                                                                                   | -                                 | -                           | P_trifoliata_00745_mRNA_15,1    |
| GF0050455 | 0                              | 0                        | 1                            | Hypothetical protein (1)                                                                                              |                                                                                                                                                                                                                                                                                                           |                                                                                                                                                                                                   | -                                 | -                           | P_trifoliata_00745_mRNA_12,1    |
| GF0050454 | 0                              | 0                        | 1                            | Hypothetical protein (1)                                                                                              |                                                                                                                                                                                                                                                                                                           |                                                                                                                                                                                                   | -                                 | -                           | P_trifoliata_00744_mRNA_8,1     |
| GF0050453 | 0                              | 0                        | 1                            | Progesterone 5-beta-reductase (1)                                                                                     |                                                                                                                                                                                                                                                                                                           | Gibberellin regulated protein [IPRO03854] (1)                                                                                                                                                     | -                                 | -                           | P_trifoliata_00744_mRNA_5,1     |
| GF0050452 | 0                              | 0                        | 1                            | Hypothetical protein (1)                                                                                              |                                                                                                                                                                                                                                                                                                           | NAD(P)-binding domain [IPRO16040] (1)                                                                                                                                                             | -                                 | -                           | P_trifoliata_00744_mRNA_4,1     |
| GF0050451 | 0                              | 0                        | 1                            | Hypothetical protein (1)                                                                                              |                                                                                                                                                                                                                                                                                                           |                                                                                                                                                                                                   | -                                 | -                           | P_trifoliata_00744_mRNA_3,1     |
| GF0050450 | 0                              | 0                        | 1                            | Hypothetical protein (1)                                                                                              |                                                                                                                                                                                                                                                                                                           |                                                                                                                                                                                                   | -                                 | -                           | P_trifoliata_00744_mRNA_1,1     |
| GF0050449 | 0                              | 0                        | 1                            | Hypothetical protein (1)                                                                                              |                                                                                                                                                                                                                                                                                                           | Trichome hirtellinase-like family [IPRO29962] (1); PC-Esterase [IPRO26057] (1)                                                                                                                    | -                                 | -                           | P_trifoliata_00743_mRNA_9,1     |
| GF0050448 | 0                              | 0                        | 1                            | Hypothetical protein (1)                                                                                              |                                                                                                                                                                                                                                                                                                           |                                                                                                                                                                                                   | -                                 | -                           | P_trifoliata_00743_mRNA_8,1     |
| GF0050447 | 0                              | 0                        | 1                            | Triacylglycerol lipase (1)                                                                                            | lipid metabolic process [GO:0006629 biological_process] (1)                                                                                                                                                                                                                                               | Alpha/Beta hydrolase fold [IPRO29058] (1); Fungal lipase-like domain [IPRO02921] (1)                                                                                                              | -                                 | -                           | P_trifoliata_00743_mRNA_5,1     |
| GF0050446 | 0                              | 0                        | 1                            | Hypothetical protein (1)                                                                                              |                                                                                                                                                                                                                                                                                                           | Concanavalin A-like lectin/glycanase domain [IPRO13320] (1)                                                                                                                                       | -                                 | -                           | P_trifoliata_00742_mRNA_10,1    |
| GF0050445 | 0                              | 0                        | 1                            | Hypothetical protein (1)                                                                                              |                                                                                                                                                                                                                                                                                                           |                                                                                                                                                                                                   | -                                 | -                           | P_trifoliata_00740_mRNA_4,1     |
| GF0050444 | 0                              | 0                        | 1                            | Hypothetical protein (1)                                                                                              |                                                                                                                                                                                                                                                                                                           |                                                                                                                                                                                                   | -                                 | -                           | P_trifoliata_00739_mRNA_7,1     |
| GF0050443 | 0                              | 0                        | 1                            | Hypothetical protein (1)                                                                                              |                                                                                                                                                                                                                                                                                                           |                                                                                                                                                                                                   | -                                 | -                           | P_trifoliata_00738_mRNA_8,1     |
| GF0050442 | 0                              | 0                        | 1                            | Leucine-rich repeat receptor protein kinase family protein, putative (1)                                              | protein binding [GO:0005515 molecular_function] (1)                                                                                                                                                                                                                                                       | Leucine-rich repeat domain, L domain-like [IPRO32675] (1); Leucine-rich repeat, typical subtype [IPRO03591] (1); Leucine-rich repeat [IPRO01611] (1)                                              | -                                 | -                           | P_trifoliata_00738_mRNA_7,1     |
| GF0050441 | 0                              | 0                        | 1                            | Retrosposon protein, putative, unclassified (1)                                                                       |                                                                                                                                                                                                                                                                                                           | Reverse transcriptase zinc-binding domain [IPRO29600] (1); Reverse transcriptase domain [IPRO00477] (1)                                                                                           | -                                 | -                           | P_trifoliata_00738_mRNA_3,1     |
| GF0050440 | 0                              | 0                        | 1                            | Receptor protein kinase (1)                                                                                           | ATP binding [GO:0005524 molecular_function] (1); protein phosphorylation [GO:0006468 biological_process] (1); protein kinase activity [GO:0004672 molecular_function] (1)                                                                                                                                 | Serine-threonine/tyrosine-protein kinase catalytic domain [IPRO01245] (1); Protein kinase-like domain [IPRO11009] (1); Protein kinase domain [IPRO00719] (1)                                      | -                                 | -                           | P_trifoliata_00738_mRNA_10,1    |
| GF0050439 | 0                              | 0                        | 1                            | Disease resistance protein (1)                                                                                        | ADP binding [GO:0043531 molecular_function] (1)                                                                                                                                                                                                                                                           | P-loop containing nucleoside triphosphate hydrolase [IPRO27417] (1); NB-ARC [IPRO02182] (1)                                                                                                       | -                                 | -                           | P_trifoliata_00738_mRNA_1,1     |
| GF0050438 | 0                              | 0                        | 1                            | Hypothetical protein (1)                                                                                              |                                                                                                                                                                                                                                                                                                           | MULE transposon domain [IPRO18289] (1)                                                                                                                                                            | -                                 | -                           | P_trifoliata_00736_mRNA_6,1     |
| GF0050437 | 0                              | 0                        | 1                            | Hypothetical protein (1)                                                                                              |                                                                                                                                                                                                                                                                                                           |                                                                                                                                                                                                   | -                                 | -                           | P_trifoliata_00736_mRNA_5,1     |
| GF0050436 | 0                              | 0                        | 1                            | Hypothetical protein (1)                                                                                              | zinc ion binding [GO:0008270 molecular_function] (1)                                                                                                                                                                                                                                                      | Zinc finger, SWIM-type [IPRO07527] (1)                                                                                                                                                            | -                                 | -                           | P_trifoliata_00736_mRNA_4,1     |
| GF0050435 | 0                              | 0                        | 1                            | Putative mitochondrial chaperone bcs1 (1)                                                                             | ATP binding [GO:0005524 molecular_function] (1)                                                                                                                                                                                                                                                           | ATPase, AAA-type, core [IPRO03959] (1); P-loop containing nucleoside triphosphate hydrolase [IPRO27417] (1); AAA+ ATPase domain [IPRO03593] (1); ATPase, AAA-type, conserved site [IPRO03960] (1) | -                                 | -                           | P_trifoliata_00736_mRNA_2,1     |
| GF0050434 | 0                              | 0                        | 1                            | Transcription factor TFIIIB component B (1)                                                                           | transcription factor TFIIIB complex [GO:0001026 cellular_component] (1); regulation of transcription from RNA polymerase III promoter [GO:0006359 biological_process] (1); DNA binding [GO:0005677 molecular_function] (1); TFIIIB-type transcription factor activity [GO:0001026 molecular_function] (1) | Homeodomain-like [IPRO09057] (1); SANT/Myb domain [IPRO01005] (1); Transcription factor TFIIIB component B [IPRO30701] (1); SANT domain [IPRO17884] (1)                                           | -                                 | -                           | P_trifoliata_00736_mRNA_16,1    |
| GF0050433 | 0                              | 0                        | 1                            | Hypothetical protein (1)                                                                                              |                                                                                                                                                                                                                                                                                                           |                                                                                                                                                                                                   | -                                 | -                           | P_trifoliata_00736_mRNA_1,1     |
| GF0050432 | 0                              | 0                        | 1                            | Hypothetical protein (1)                                                                                              |                                                                                                                                                                                                                                                                                                           |                                                                                                                                                                                                   | -                                 | -                           | P_trifoliata_00735_mRNA_9,1     |
| GF0050431 | 0                              | 0                        | 1                            | Hypothetical protein (1)                                                                                              |                                                                                                                                                                                                                                                                                                           |                                                                                                                                                                                                   | -                                 | -                           | P_trifoliata_00735_mRNA_6,1     |
| GF0050430 | 0                              | 0                        | 1                            | Hypothetical protein (1)                                                                                              | protein binding [GO:0005515 molecular_function] (1)                                                                                                                                                                                                                                                       | Leucine-rich repeat [IPRO01611] (1); Leucine-rich repeat domain, L domain-like [IPRO32675] (1)                                                                                                    | -                                 | -                           | P_trifoliata_00735_mRNA_5,1     |
| GF0050429 | 0                              | 0                        | 1                            | Hypothetical protein (1)                                                                                              |                                                                                                                                                                                                                                                                                                           |                                                                                                                                                                                                   | -                                 | -                           | P_trifoliata_00735_mRNA_20,1    |

| ID        | Num. in <i>C. clementiae</i> | Num. in <i>C. canthii</i> | Num. in <i>P. trifoliata</i> | Note                                                                            | GO                                                                                                                                                                                                                                                                                                                 | InterPro                                                                                                                                                                                                                                                        | Members in <i>C. clementiae</i> | Members in <i>C. canthii</i> | Members in <i>P. trifoliata</i> |
|-----------|------------------------------|---------------------------|------------------------------|---------------------------------------------------------------------------------|--------------------------------------------------------------------------------------------------------------------------------------------------------------------------------------------------------------------------------------------------------------------------------------------------------------------|-----------------------------------------------------------------------------------------------------------------------------------------------------------------------------------------------------------------------------------------------------------------|---------------------------------|------------------------------|---------------------------------|
| GF0050428 | 0                            | 0                         | 0                            | 1 Hypothetical protein (1)                                                      |                                                                                                                                                                                                                                                                                                                    |                                                                                                                                                                                                                                                                 | -                               | -                            | P_trifoliata_00735_mRNA_18.1    |
| GF0050427 | 0                            | 0                         | 0                            | 1 Hypothetical protein (1)                                                      |                                                                                                                                                                                                                                                                                                                    |                                                                                                                                                                                                                                                                 | -                               | -                            | P_trifoliata_00735_mRNA_14.1    |
| GF0050426 | 0                            | 0                         | 0                            | 1 Hypothetical protein (1)                                                      |                                                                                                                                                                                                                                                                                                                    |                                                                                                                                                                                                                                                                 | -                               | -                            | P_trifoliata_00735_mRNA_13.1    |
| GF0050425 | 0                            | 0                         | 0                            | 1 Hypothetical protein (1)                                                      |                                                                                                                                                                                                                                                                                                                    |                                                                                                                                                                                                                                                                 | -                               | -                            | P_trifoliata_00734_mRNA_6.1     |
| GF0050424 | 0                            | 0                         | 0                            | 1 Germin-like protein subfamily 1 member 7 (1)                                  | manganese ion binding [GO:0031045]<br>molecular_function (1); nutrient reservoir activity [GO:0045735]<br>molecular_function (1)                                                                                                                                                                                   | RanC-like cystin domain [IPRO11051] (1); Cupin 1 [IPRO06045] (1); Germin, manganese binding site [IPRO19780] (1); Germin [IPRO01929] (1); RanC-like jelly roll fold [IPRO14710] (1)                                                                             | -                               | -                            | P_trifoliata_00734_mRNA_4.1     |
| GF0050423 | 0                            | 0                         | 0                            | 1 Hypothetical protein (1)                                                      |                                                                                                                                                                                                                                                                                                                    |                                                                                                                                                                                                                                                                 | -                               | -                            | P_trifoliata_00733_mRNA_1.1     |
| GF0050422 | 0                            | 0                         | 0                            | 1 Hypothetical protein (1)                                                      |                                                                                                                                                                                                                                                                                                                    |                                                                                                                                                                                                                                                                 | -                               | -                            | P_trifoliata_00732_mRNA_7.1     |
| GF0050421 | 0                            | 0                         | 0                            | 1 Hypothetical protein (1)                                                      |                                                                                                                                                                                                                                                                                                                    |                                                                                                                                                                                                                                                                 | -                               | -                            | P_trifoliata_00732_mRNA_6.1     |
| GF0050420 | 0                            | 0                         | 0                            | 1 Hypothetical protein (1)                                                      |                                                                                                                                                                                                                                                                                                                    |                                                                                                                                                                                                                                                                 | -                               | -                            | P_trifoliata_00732_mRNA_5.1     |
| GF0050419 | 0                            | 0                         | 0                            | 1 Hypothetical protein (1)                                                      |                                                                                                                                                                                                                                                                                                                    |                                                                                                                                                                                                                                                                 | -                               | -                            | P_trifoliata_00732_mRNA_15.1    |
| GF0050418 | 0                            | 0                         | 0                            | 1 Disease resistance family protein (1)                                         | protein binding [GO:0005515]<br>molecular_function (1)                                                                                                                                                                                                                                                             | Leucine-rich repeat [IPRO01611] (1); P-loop containing nucleoside triphosphate hydrolase [IPRO27417] (1); Leucine-rich repeat domain, L domain-like [IPRO32675] (1)                                                                                             | -                               | -                            | P_trifoliata_00732_mRNA_14.1    |
| GF0050417 | 0                            | 0                         | 0                            | 1 Mechanosensitive channel of small conductance-like 10, putative isoform 2 (1) | calcium ion binding [GO:0005509]<br>molecular_function (1)                                                                                                                                                                                                                                                         | EF-hand domain [IPRO02048] (1)                                                                                                                                                                                                                                  | -                               | -                            | P_trifoliata_00732_mRNA_13.1    |
| GF0050416 | 0                            | 0                         | 0                            | 1 Hypothetical protein (1)                                                      |                                                                                                                                                                                                                                                                                                                    |                                                                                                                                                                                                                                                                 | -                               | -                            | P_trifoliata_00731_mRNA_8.1     |
| GF0050415 | 0                            | 0                         | 0                            | 1 Hypothetical protein (1)                                                      |                                                                                                                                                                                                                                                                                                                    |                                                                                                                                                                                                                                                                 | -                               | -                            | P_trifoliata_00731_mRNA_5.1     |
| GF0050414 | 0                            | 0                         | 0                            | 1 Hypothetical protein (1)                                                      |                                                                                                                                                                                                                                                                                                                    |                                                                                                                                                                                                                                                                 | -                               | -                            | P_trifoliata_00731_mRNA_4.1     |
| GF0050413 | 0                            | 0                         | 0                            | 1 Hypothetical protein (1)                                                      | integral component of membrane [GO:0016021 cellular_component] (1); transmembrane transport [GO:0055085 biological_process] (1)<br>RNA binding [GO:0003723 molecular_function] (1); ribonuclease T2 activity [GO:0003897 molecular_function] (1)                                                                   | Sodium/calcium exchanger membrane region [IPRO04837] (1)                                                                                                                                                                                                        | -                               | -                            | P_trifoliata_00731_mRNA_1.1     |
| GF0050412 | 0                            | 0                         | 0                            | 1 Hypothetical protein (1)                                                      |                                                                                                                                                                                                                                                                                                                    |                                                                                                                                                                                                                                                                 | -                               | -                            | P_trifoliata_00730_mRNA_9.1     |
| GF0050411 | 0                            | 0                         | 0                            | 1 Hypothetical protein (1)                                                      |                                                                                                                                                                                                                                                                                                                    |                                                                                                                                                                                                                                                                 | -                               | -                            | P_trifoliata_00730_mRNA_7.1     |
| GF0050410 | 0                            | 0                         | 0                            | 1 Hypothetical protein (1)                                                      | calmodulin binding [GO:0005516]<br>molecular_function (1)                                                                                                                                                                                                                                                          | Calcium-transporting P-type ATPase, N-terminal autoinhibitory domain [IPRO24750] (1)                                                                                                                                                                            | -                               | -                            | P_trifoliata_00730_mRNA_6.1     |
| GF0050409 | 0                            | 0                         | 0                            | 1 Hypothetical protein (1)                                                      | protein phosphorylation [GO:0006468 biological_process] (1); protein kinase activity [GO:0004672 molecular_function] (1); ATP binding [GO:0005524 molecular_function] (1); calmodulin binding [GO:0005516 molecular_function] (1)                                                                                  | Protein kinase-like domain [IPRO11009] (1); Calcium-transporting P-type ATPase, N-terminal autoinhibitory domain [IPRO24750] (1); Protein kinase domain [IPRO00719] (1)                                                                                         | -                               | -                            | P_trifoliata_00730_mRNA_5.1     |
| GF0050408 | 0                            | 0                         | 0                            | 1 LysM type receptor kinase (1)                                                 | ATP binding [GO:0005524 molecular_function] (1); protein phosphorylation [GO:0006468 biological_process] (1); protein kinase activity [GO:0004672 molecular_function] (1)                                                                                                                                          | Serine/threonine dual specificity protein kinase, catalytic domain [IPRO02290] (1); Protein kinase-like domain [IPRO11009] (1); Cytoskeleton A-like lectin glucanase domain [IPRO13320] (1); LysM domain [IPRO18392] (1); Protein kinase domain [IPRO00719] (1) | -                               | -                            | P_trifoliata_00729_mRNA_4.1     |
| GF0050407 | 0                            | 0                         | 0                            | 1 Hypothetical protein (1)                                                      |                                                                                                                                                                                                                                                                                                                    |                                                                                                                                                                                                                                                                 | -                               | -                            | P_trifoliata_00728_mRNA_9.1     |
| GF0050406 | 0                            | 0                         | 0                            | 1 Hypothetical protein (1)                                                      |                                                                                                                                                                                                                                                                                                                    |                                                                                                                                                                                                                                                                 | -                               | -                            | P_trifoliata_00728_mRNA_8.1     |
| GF0050405 | 0                            | 0                         | 0                            | 1 Hypothetical protein (1)                                                      |                                                                                                                                                                                                                                                                                                                    |                                                                                                                                                                                                                                                                 | -                               | -                            | P_trifoliata_00728_mRNA_7.1     |
| GF0050404 | 0                            | 0                         | 0                            | 1 Hypothetical protein (1)                                                      |                                                                                                                                                                                                                                                                                                                    |                                                                                                                                                                                                                                                                 | -                               | -                            | P_trifoliata_00728_mRNA_5.1     |
| GF0050403 | 0                            | 0                         | 0                            | 1 Hypothetical protein (1)                                                      |                                                                                                                                                                                                                                                                                                                    |                                                                                                                                                                                                                                                                 | -                               | -                            | P_trifoliata_00728_mRNA_3.1     |
| GF0050402 | 0                            | 0                         | 0                            | 1 Hypothetical protein (1)                                                      |                                                                                                                                                                                                                                                                                                                    |                                                                                                                                                                                                                                                                 | -                               | -                            | P_trifoliata_00728_mRNA_15.1    |
| GF0050401 | 0                            | 0                         | 0                            | 1 Hypothetical protein (1)                                                      |                                                                                                                                                                                                                                                                                                                    |                                                                                                                                                                                                                                                                 | -                               | -                            | P_trifoliata_00728_mRNA_14.1    |
| GF0050400 | 0                            | 0                         | 0                            | 1 Hypothetical protein (1)                                                      |                                                                                                                                                                                                                                                                                                                    |                                                                                                                                                                                                                                                                 | -                               | -                            | P_trifoliata_00728_mRNA_10.1    |
| GF0050399 | 0                            | 0                         | 0                            | 1 Folic acid binding / transferase (1)                                          | transferase activity [GO:0016740 molecular_function] (1); folic acid binding [GO:0005542 molecular_function] (1); metabolic process [GO:0008152 biological_process] (1)                                                                                                                                            | Forminotransferase, C-terminal subdomain [IPRO13802] (1); Forminotransferase subdomain [IPRO22864] (1); Forminotransferase, N-terminal subdomain [IPRO12886] (1)                                                                                                | -                               | -                            | P_trifoliata_00726_mRNA_4.1     |
| GF0050398 | 0                            | 0                         | 0                            | 1 Hypothetical protein (1)                                                      |                                                                                                                                                                                                                                                                                                                    |                                                                                                                                                                                                                                                                 | -                               | -                            | P_trifoliata_00726_mRNA_12.1    |
| GF0050397 | 0                            | 0                         | 0                            | 1 Hypothetical protein (1)                                                      |                                                                                                                                                                                                                                                                                                                    |                                                                                                                                                                                                                                                                 | -                               | -                            | P_trifoliata_00726_mRNA_10.1    |
| GF0050396 | 0                            | 0                         | 0                            | 1 Cytokinin riboside 5'-monophosphate phosphoribosyltransferase (1)             |                                                                                                                                                                                                                                                                                                                    | LOG family [IPRO31100] (1)                                                                                                                                                                                                                                      | -                               | -                            | P_trifoliata_00725_mRNA_3.1     |
| GF0050395 | 0                            | 0                         | 0                            | 1 Hypothetical protein (1)                                                      |                                                                                                                                                                                                                                                                                                                    |                                                                                                                                                                                                                                                                 | -                               | -                            | P_trifoliata_00725_mRNA_2.1     |
| GF0050394 | 0                            | 0                         | 0                            | 1 Hypothetical protein (1)                                                      |                                                                                                                                                                                                                                                                                                                    |                                                                                                                                                                                                                                                                 | -                               | -                            | P_trifoliata_00725_mRNA_12.1    |
| GF0050393 | 0                            | 0                         | 0                            | 1 Hypothetical protein (1)                                                      |                                                                                                                                                                                                                                                                                                                    |                                                                                                                                                                                                                                                                 | -                               | -                            | P_trifoliata_00725_mRNA_10.1    |
| GF0050392 | 0                            | 0                         | 0                            | 1 Hypothetical protein (1)                                                      |                                                                                                                                                                                                                                                                                                                    |                                                                                                                                                                                                                                                                 | -                               | -                            | P_trifoliata_00724_mRNA_9.1     |
| GF0050391 | 0                            | 0                         | 0                            | 1 Hypothetical protein (1)                                                      |                                                                                                                                                                                                                                                                                                                    |                                                                                                                                                                                                                                                                 | -                               | -                            | P_trifoliata_00724_mRNA_7.1     |
| GF0050390 | 0                            | 0                         | 0                            | 1 Hypothetical protein (1)                                                      |                                                                                                                                                                                                                                                                                                                    |                                                                                                                                                                                                                                                                 | -                               | -                            | P_trifoliata_00724_mRNA_5.1     |
| GF0050389 | 0                            | 0                         | 0                            | 1 Hypothetical protein (1)                                                      | DNA binding [GO:0003677 molecular_function] (1); protein dimerization activity [GO:0046983 molecular_function] (1)                                                                                                                                                                                                 | Transcription factor, MADS-box [IPRO02100] (1)                                                                                                                                                                                                                  | -                               | -                            | P_trifoliata_00724_mRNA_4.1     |
| GF0050388 | 0                            | 0                         | 0                            | 1 Hypothetical protein (1)                                                      |                                                                                                                                                                                                                                                                                                                    |                                                                                                                                                                                                                                                                 | -                               | -                            | P_trifoliata_00724_mRNA_2.1     |
| GF0050387 | 0                            | 0                         | 0                            | 1 MADS-box transcription factor family protein (1)                              | protein dimerization activity [GO:0046983 molecular_function] (1); DNA binding [GO:0003677 molecular_function] (1)                                                                                                                                                                                                 | Transcription factor, MADS-box [IPRO02100] (1)                                                                                                                                                                                                                  | -                               | -                            | P_trifoliata_00724_mRNA_11.1    |
| GF0050386 | 0                            | 0                         | 0                            | 1 Hypothetical protein (1)                                                      | nucleic acid binding [GO:0003676 molecular_function] (1)                                                                                                                                                                                                                                                           | Ribonuclease H-like domain [IPRO12337] (1)                                                                                                                                                                                                                      | -                               | -                            | P_trifoliata_00723_mRNA_9.1     |
| GF0050385 | 0                            | 0                         | 0                            | 1 Complex 1 subunit (1)                                                         |                                                                                                                                                                                                                                                                                                                    | NADH:ubiquinone oxidoreductase, ESSS subunit [IPRO19329] (1)                                                                                                                                                                                                    | -                               | -                            | P_trifoliata_00723_mRNA_1.1     |
| GF0050384 | 0                            | 0                         | 0                            | 1 Hypothetical protein (1)                                                      | hydrolase activity [GO:0016787 molecular_function] (1)                                                                                                                                                                                                                                                             | Calcinurin-like phosphoesterase domain, apuII type [IPRO04843] (1); Metallo-dependent phosphatase-like [IPRO29052] (1)                                                                                                                                          | -                               | -                            | P_trifoliata_00722_mRNA_8.1     |
| GF0050383 | 0                            | 0                         | 0                            | 1 Hypothetical protein (1)                                                      |                                                                                                                                                                                                                                                                                                                    |                                                                                                                                                                                                                                                                 | -                               | -                            | P_trifoliata_00722_mRNA_6.1     |
| GF0050382 | 0                            | 0                         | 0                            | 1 Hypothetical protein (1)                                                      |                                                                                                                                                                                                                                                                                                                    |                                                                                                                                                                                                                                                                 | -                               | -                            | P_trifoliata_00721_mRNA_10.1    |
| GF0050381 | 0                            | 0                         | 0                            | 1 Hypothetical protein (1)                                                      | oxidation-reduction process [GO:0055114 biological_process] (1); oxidoreductase activity, acting on the aldehyde or oxo group of donors, NAD or NADP as acceptor [GO:0016620 molecular_function] (1)                                                                                                               | Glyceraldehyde 3-phosphate dehydrogenase, catalytic domain [IPRO20829] (1); NAD(P)-binding domain [IPRO16040] (1); Glyceraldehyde 3-phosphate dehydrogenase family [IPRO20831] (1); Glyceraldehyde 3-phosphate dehydrogenase, active site [IPRO20830] (1)       | -                               | -                            | P_trifoliata_00721_mRNA_1.1     |
| GF0050380 | 0                            | 0                         | 0                            | 1 Hypothetical protein (1)                                                      |                                                                                                                                                                                                                                                                                                                    |                                                                                                                                                                                                                                                                 | -                               | -                            | P_trifoliata_00719_mRNA_9.1     |
| GF0050379 | 0                            | 0                         | 0                            | 1 Hypothetical protein (1)                                                      | nucleic acid binding [GO:0003676 molecular_function] (1)                                                                                                                                                                                                                                                           | Reverse transcriptase, RNA-dependent DNA polymerase [IPRO13103] (1); Ribonuclease H-like domain [IPRO12337] (1)                                                                                                                                                 | -                               | -                            | P_trifoliata_00719_mRNA_8.1     |
| GF0050378 | 0                            | 0                         | 0                            | 1 Monosaccharide transport protein (1)                                          |                                                                                                                                                                                                                                                                                                                    |                                                                                                                                                                                                                                                                 | -                               | -                            | P_trifoliata_00719_mRNA_5.1     |
| GF0050377 | 0                            | 0                         | 0                            | 1 Hypothetical protein (1)                                                      |                                                                                                                                                                                                                                                                                                                    |                                                                                                                                                                                                                                                                 | -                               | -                            | P_trifoliata_00719_mRNA_3.1     |
| GF0050376 | 0                            | 0                         | 0                            | 1 Hypothetical protein (1)                                                      |                                                                                                                                                                                                                                                                                                                    |                                                                                                                                                                                                                                                                 | -                               | -                            | P_trifoliata_00719_mRNA_2.1     |
| GF0050375 | 0                            | 0                         | 0                            | 1 Hypothetical protein (1)                                                      |                                                                                                                                                                                                                                                                                                                    |                                                                                                                                                                                                                                                                 | -                               | -                            | P_trifoliata_00719_mRNA_13.1    |
| GF0050374 | 0                            | 0                         | 0                            | 1 Hypothetical protein (1)                                                      |                                                                                                                                                                                                                                                                                                                    |                                                                                                                                                                                                                                                                 | -                               | -                            | P_trifoliata_00718_mRNA_8.1     |
| GF0050373 | 0                            | 0                         | 0                            | 1 Hypothetical protein (1)                                                      |                                                                                                                                                                                                                                                                                                                    |                                                                                                                                                                                                                                                                 | -                               | -                            | P_trifoliata_00718_mRNA_7.1     |
| GF0050372 | 0                            | 0                         | 0                            | 1 Hypothetical protein (1)                                                      |                                                                                                                                                                                                                                                                                                                    |                                                                                                                                                                                                                                                                 | -                               | -                            | P_trifoliata_00718_mRNA_6.1     |
| GF0050371 | 0                            | 0                         | 0                            | 1 Hypothetical protein (1)                                                      |                                                                                                                                                                                                                                                                                                                    |                                                                                                                                                                                                                                                                 | -                               | -                            | P_trifoliata_00718_mRNA_5.1     |
| GF0050370 | 0                            | 0                         | 0                            | 1 Hypothetical protein (1)                                                      |                                                                                                                                                                                                                                                                                                                    |                                                                                                                                                                                                                                                                 | -                               | -                            | P_trifoliata_00718_mRNA_19.1    |
| GF0050369 | 0                            | 0                         | 0                            | 1 Hypothetical protein (1)                                                      |                                                                                                                                                                                                                                                                                                                    |                                                                                                                                                                                                                                                                 | -                               | -                            | P_trifoliata_00718_mRNA_14.1    |
| GF0050368 | 0                            | 0                         | 0                            | 1 Hypothetical protein (1)                                                      |                                                                                                                                                                                                                                                                                                                    |                                                                                                                                                                                                                                                                 | -                               | -                            | P_trifoliata_00718_mRNA_13.1    |
| GF0050367 | 0                            | 0                         | 0                            | 1 Hypothetical protein (1)                                                      |                                                                                                                                                                                                                                                                                                                    |                                                                                                                                                                                                                                                                 | -                               | -                            | P_trifoliata_00718_mRNA_12.1    |
| GF0050366 | 0                            | 0                         | 0                            | 1 Cytochrome P450 71D8 (1)                                                      | oxidoreductase activity, acting on paired donors, with incorporation or reduction of molecular oxygen [GO:0016705 molecular_function] (1); oxidation-reduction process [GO:0055114 biological_process] (1); heme binding [GO:0020037 molecular_function] (1); iron ion binding [GO:0005506 molecular_function] (1) | Cytochrome P450 [IPRO01128] (1); Cytochrome P450, E-class, group I [IPRO02401] (1)                                                                                                                                                                              | -                               | -                            | P_trifoliata_00717_mRNA_7.1     |
| GF0050365 | 0                            | 0                         | 0                            | 1 Hypothetical protein (1)                                                      |                                                                                                                                                                                                                                                                                                                    |                                                                                                                                                                                                                                                                 | -                               | -                            | P_trifoliata_00717_mRNA_2.1     |
| GF0050364 | 0                            | 0                         | 0                            | 1 Hypothetical protein (1)                                                      |                                                                                                                                                                                                                                                                                                                    |                                                                                                                                                                                                                                                                 | -                               | -                            | P_trifoliata_00716_mRNA_5.1     |
| GF0050363 | 0                            | 0                         | 0                            | 1 Glucan endo-1,3-beta-glucosidase 11 isoform 4 (1)                             | hydrolase activity, hydrolyzing O-glycosyl compounds [GO:0004553 molecular_function] (1); carbohydrate metabolic process [GO:0005975 biological_process] (1)                                                                                                                                                       | Glycoside hydrolase family 17 [IPRO00490] (1); Glycoside hydrolase superfamily [IPRO17853] (1); Glycoside hydrolase, catalytic domain [IPRO13781] (1)                                                                                                           | -                               | -                            | P_trifoliata_00716_mRNA_3.1     |
| GF0050362 | 0                            | 0                         | 0                            | 1 Glucan endo-1,3-beta-glucosidase 7 (1)                                        | carbohydrate metabolic process [GO:0005975 biological_process] (1); hydrolase activity, hydrolyzing O-glycosyl compounds [GO:0004553 molecular_function] (1)                                                                                                                                                       | Glycoside hydrolase, catalytic domain [IPRO13781] (1); Glycoside hydrolase superfamily [IPRO17853] (1); Glycoside hydrolase family 17 [IPRO00490] (1); XX domain [IPRO12946] (1)                                                                                | -                               | -                            | P_trifoliata_00716_mRNA_2.1     |

| ID        | Num. in <i>C. clementiae</i> | Num. in <i>C. canthii</i> | Num. in <i>P. trifoliata</i> | Note                                                | GO                                                                                                                                                                                                                                                                                                   | InterPro                                                                                                                                                                                                                                                                                                                                                                        | Members in <i>C. clementiae</i> | Members in <i>C. canthii</i> | Members in <i>P. trifoliata</i> |                              |
|-----------|------------------------------|---------------------------|------------------------------|-----------------------------------------------------|------------------------------------------------------------------------------------------------------------------------------------------------------------------------------------------------------------------------------------------------------------------------------------------------------|---------------------------------------------------------------------------------------------------------------------------------------------------------------------------------------------------------------------------------------------------------------------------------------------------------------------------------------------------------------------------------|---------------------------------|------------------------------|---------------------------------|------------------------------|
| GF0050361 | 0                            | 0                         | 1                            | Hypothetical protein (1)                            |                                                                                                                                                                                                                                                                                                      |                                                                                                                                                                                                                                                                                                                                                                                 |                                 |                              | P_trifoliata_00716_mRNA_1,1     |                              |
| GF0050360 | 0                            | 0                         | 1                            | Hypothetical protein (1)                            |                                                                                                                                                                                                                                                                                                      | Reverse transcriptase domain [IPR009477] (1)                                                                                                                                                                                                                                                                                                                                    |                                 |                              | P_trifoliata_00715_mRNA_8,1     |                              |
| GF0050359 | 0                            | 0                         | 1                            | Hypothetical protein (1)                            |                                                                                                                                                                                                                                                                                                      |                                                                                                                                                                                                                                                                                                                                                                                 |                                 |                              | P_trifoliata_00715_mRNA_7,1     |                              |
| GF0050358 | 0                            | 0                         | 1                            | Hypothetical protein (1)                            |                                                                                                                                                                                                                                                                                                      |                                                                                                                                                                                                                                                                                                                                                                                 |                                 |                              | P_trifoliata_00715_mRNA_1,1     |                              |
| GF0050357 | 0                            | 0                         | 1                            | Hypothetical protein (1)                            |                                                                                                                                                                                                                                                                                                      |                                                                                                                                                                                                                                                                                                                                                                                 |                                 |                              | P_trifoliata_00714_mRNA_8,1     |                              |
| GF0050356 | 0                            | 0                         | 1                            | Hypothetical protein (1)                            | ATP binding [GO:000524 molecular_function] (1); protein kinase activity [GO:0004672 molecular_function] (1); protein phosphorylation [GO:0006468 biological_process] (1)                                                                                                                             | Protein kinase domain [IPR000719] (1); Protein kinase-like domain [IPR011009] (1)                                                                                                                                                                                                                                                                                               |                                 |                              | P_trifoliata_00714_mRNA_4,1     |                              |
| GF0050355 | 0                            | 0                         | 1                            | Hypothetical protein (1)                            |                                                                                                                                                                                                                                                                                                      |                                                                                                                                                                                                                                                                                                                                                                                 |                                 |                              | P_trifoliata_00714_mRNA_3,1     |                              |
| GF0050354 | 0                            | 0                         | 1                            | Hypothetical protein (1)                            |                                                                                                                                                                                                                                                                                                      |                                                                                                                                                                                                                                                                                                                                                                                 |                                 |                              | P_trifoliata_00714_mRNA_2,1     |                              |
| GF0050353 | 0                            | 0                         | 1                            | Hypothetical protein (1)                            | structural constituent of ribosome [GO:0003735 molecular_function] (1); intracellular [GO:0005622 cellular_component] (1); translation [GO:0006412 biological_process] (1); ribosome [GO:0005840 cellular_component] (1)                                                                             | Ribosomal protein L14 [IPR002784] (1); NmrA-like domain [IPR008030] (1); Ribosomal protein L2 domain 2 [IPR014722] (1); Translation protein SHE-like domain [IPR008991] (1); NAD(P)-binding domain [IPR016040] (1)                                                                                                                                                              |                                 |                              | P_trifoliata_00713_mRNA_9,1     |                              |
| GF0050352 | 0                            | 0                         | 1                            | Hypothetical protein (1)                            |                                                                                                                                                                                                                                                                                                      | Pentatricopeptide repeat [IPR002885] (1)                                                                                                                                                                                                                                                                                                                                        |                                 |                              |                                 | P_trifoliata_00713_mRNA_7,1  |
| GF0050351 | 0                            | 0                         | 1                            | Germin-like protein subfamily 1 member 7 (1)        | ATP binding [GO:000524 molecular_function] (1); protein kinase activity [GO:0004672 molecular_function] (1); protein phosphorylation [GO:0006468 biological_process] (1); nutrient reservoir activity [GO:0045735 molecular_function] (1); manganese ion binding [GO:0030145 molecular_function] (1) | Serine/threonine-protein kinase, active site [IPR008271] (1); RosC-like cupin domain [IPR010511] (1); RosC-like jelly roll fold [IPR014710] (1); Protein kinase-like domain [IPR011009] (1); Protein kinase domain [IPR000719] (1); Capin 1 [IPR060645] (1); Germin, manganese binding site [IPR019780] (1)                                                                     |                                 |                              | P_trifoliata_00713_mRNA_6,1     |                              |
| GF0050350 | 0                            | 0                         | 1                            | PPR containing plant-like protein (1)               |                                                                                                                                                                                                                                                                                                      | Pentatricopeptide repeat [IPR002885] (1)                                                                                                                                                                                                                                                                                                                                        |                                 |                              |                                 | P_trifoliata_00713_mRNA_4,1  |
| GF0050349 | 0                            | 0                         | 1                            | Hypothetical protein (1)                            |                                                                                                                                                                                                                                                                                                      | Pentatricopeptide repeat [IPR002885] (1)                                                                                                                                                                                                                                                                                                                                        |                                 |                              |                                 | P_trifoliata_00713_mRNA_3,1  |
| GF0050348 | 0                            | 0                         | 1                            | Hypothetical protein (1)                            |                                                                                                                                                                                                                                                                                                      |                                                                                                                                                                                                                                                                                                                                                                                 |                                 |                              |                                 | P_trifoliata_00713_mRNA_13,1 |
| GF0050347 | 0                            | 0                         | 1                            | Disease resistance protein RPS5 (1)                 | ADP binding [GO:0043531 molecular_function] (1)                                                                                                                                                                                                                                                      | NB-ARC [IPR002182] (1); P-loop containing nucleoside triphosphate hydrolase [IPR027417] (1)                                                                                                                                                                                                                                                                                     |                                 |                              |                                 | P_trifoliata_00712_mRNA_9,1  |
| GF0050346 | 0                            | 0                         | 1                            | Hypothetical protein (1)                            |                                                                                                                                                                                                                                                                                                      | Leucine-rich repeat domain, L domain-like [IPR032675] (1)                                                                                                                                                                                                                                                                                                                       |                                 |                              |                                 | P_trifoliata_00712_mRNA_7,1  |
| GF0050345 | 0                            | 0                         | 1                            | Disease resistance RPS5-like protein (1)            | ADP binding [GO:0043531 molecular_function] (1)                                                                                                                                                                                                                                                      | Leucine-rich repeat domain, L domain-like [IPR032675] (1); P-loop containing nucleoside triphosphate hydrolase [IPR027417] (1); NB-ARC [IPR002182] (1)                                                                                                                                                                                                                          |                                 |                              |                                 | P_trifoliata_00712_mRNA_5,1  |
| GF0050344 | 0                            | 0                         | 1                            | Resistance protein RGC2 (1)                         |                                                                                                                                                                                                                                                                                                      | Leucine-rich repeat domain, L domain-like [IPR032675] (1)                                                                                                                                                                                                                                                                                                                       |                                 |                              |                                 | P_trifoliata_00712_mRNA_4,1  |
| GF0050343 | 0                            | 0                         | 1                            | O-methyltransferase ZRP4 (1)                        | methyltransferase activity [GO:0008168 molecular_function] (1); protein dimerization activity [GO:0046983 molecular_function] (1); O-methyltransferase activity [GO:0008171 molecular_function] (1)                                                                                                  | S-adenosyl-L-methionine-dependent methyltransferase [IPR029063] (1); Plant methyltransferase dimerization [IPR012967] (1); O-methyltransferase COMT-type [IPR016461] (1); Winged helix-helix DNA-binding domain [IPR011991] (1); O-methyltransferase, family 2 [IPR010777] (1)                                                                                                  |                                 |                              |                                 | P_trifoliata_00712_mRNA_2,1  |
| GF0050342 | 0                            | 0                         | 1                            | Disease resistance protein RPS5 (1)                 | ADP binding [GO:0043531 molecular_function] (1)                                                                                                                                                                                                                                                      | NB-ARC [IPR002182] (1); P-loop containing nucleoside triphosphate hydrolase [IPR027417] (1)                                                                                                                                                                                                                                                                                     |                                 |                              |                                 | P_trifoliata_00712_mRNA_10,1 |
| GF0050341 | 0                            | 0                         | 1                            | Hypothetical protein (1)                            |                                                                                                                                                                                                                                                                                                      |                                                                                                                                                                                                                                                                                                                                                                                 |                                 |                              |                                 | P_trifoliata_00712_mRNA_1,1  |
| GF0050340 | 0                            | 0                         | 1                            | Hypothetical protein (1)                            |                                                                                                                                                                                                                                                                                                      |                                                                                                                                                                                                                                                                                                                                                                                 |                                 |                              |                                 | P_trifoliata_00710_mRNA_9,1  |
| GF0050339 | 0                            | 0                         | 1                            | Hypothetical protein (1)                            | protein phosphorylation [GO:0006468 biological_process] (1); protein kinase activity [GO:0004672 molecular_function] (1); ATP binding [GO:000524 molecular_function] (1); calmodulin binding [GO:0005516 molecular_function] (1)                                                                     | Serine/threonine/tyrosine specificity protein kinase, catalytic domain [IPR002290] (1); Serine/threonine-protein kinase, active site [IPR008271] (1); Protein kinase, ATP binding site [IPR017441] (1); Calcium-transporting P-type ATPase, N-terminal autoinhibitory domain [IPR024750] (1); Protein kinase-like domain [IPR011009] (1); Protein kinase domain [IPR000719] (1) |                                 |                              |                                 | P_trifoliata_00710_mRNA_7,1  |
| GF0050338 | 0                            | 0                         | 1                            | Hypothetical protein (1)                            |                                                                                                                                                                                                                                                                                                      |                                                                                                                                                                                                                                                                                                                                                                                 |                                 |                              |                                 | P_trifoliata_00710_mRNA_6,1  |
| GF0050337 | 0                            | 0                         | 1                            | Hypothetical protein (1)                            |                                                                                                                                                                                                                                                                                                      |                                                                                                                                                                                                                                                                                                                                                                                 |                                 |                              |                                 | P_trifoliata_00709_mRNA_7,1  |
| GF0050336 | 0                            | 0                         | 1                            | Hypothetical protein (1)                            | regulation of transcription, DNA-templated [GO:0006355 biological_process] (1)                                                                                                                                                                                                                       | FHY3/FAR1 family [IPR031052] (1)                                                                                                                                                                                                                                                                                                                                                |                                 |                              |                                 | P_trifoliata_00709_mRNA_5,1  |
| GF0050335 | 0                            | 0                         | 1                            | Hypothetical protein (1)                            |                                                                                                                                                                                                                                                                                                      | Aspartic peptidase domain [IPR021109] (1); Protein kinase-like domain [IPR011009] (1)                                                                                                                                                                                                                                                                                           |                                 |                              |                                 | P_trifoliata_00709_mRNA_11,1 |
| GF0050334 | 0                            | 0                         | 1                            | Hypothetical protein (1)                            |                                                                                                                                                                                                                                                                                                      |                                                                                                                                                                                                                                                                                                                                                                                 |                                 |                              |                                 | P_trifoliata_00709_mRNA_10,1 |
| GF0050333 | 0                            | 0                         | 1                            | LRR receptor-like kinase (1)                        | protein binding [GO:0005515 molecular_function] (1)                                                                                                                                                                                                                                                  | Leucine-rich repeat domain, L domain-like [IPR032675] (1); Leucine-rich repeat, typical subtype [IPR003591] (1); Leucine-rich repeat-containing N-terminal, plant-type [IPR013210] (1); Leucine-rich repeat [IPR001611] (1)                                                                                                                                                     |                                 |                              |                                 | P_trifoliata_00709_mRNA_1,1  |
| GF0050332 | 0                            | 0                         | 1                            | Hypothetical protein (1)                            |                                                                                                                                                                                                                                                                                                      |                                                                                                                                                                                                                                                                                                                                                                                 |                                 |                              |                                 | P_trifoliata_00708_mRNA_9,1  |
| GF0050331 | 0                            | 0                         | 1                            | Hypothetical protein (1)                            |                                                                                                                                                                                                                                                                                                      |                                                                                                                                                                                                                                                                                                                                                                                 |                                 |                              |                                 | P_trifoliata_00708_mRNA_8,1  |
| GF0050330 | 0                            | 0                         | 1                            | Hypothetical protein (1)                            |                                                                                                                                                                                                                                                                                                      |                                                                                                                                                                                                                                                                                                                                                                                 |                                 |                              |                                 | P_trifoliata_00708_mRNA_7,1  |
| GF0050329 | 0                            | 0                         | 1                            | Hypothetical protein (1)                            |                                                                                                                                                                                                                                                                                                      |                                                                                                                                                                                                                                                                                                                                                                                 |                                 |                              |                                 | P_trifoliata_00708_mRNA_6,1  |
| GF0050328 | 0                            | 0                         | 1                            | Non-LTR retroelement reverse transcriptase-like (1) | nucleic acid binding [GO:0003676 molecular_function] (1); RNA-DNA hybrid ribonuclease activity [GO:0004523 molecular_function] (1)                                                                                                                                                                   | Ribonuclease H-like domain [IPR012377] (1); Reverse transcriptase zinc-binding domain [IPR026960] (1); Ribonuclease H domain [IPR002156] (1)                                                                                                                                                                                                                                    |                                 |                              |                                 | P_trifoliata_00708_mRNA_4,1  |
| GF0050327 | 0                            | 0                         | 1                            | Hypothetical protein (1)                            |                                                                                                                                                                                                                                                                                                      |                                                                                                                                                                                                                                                                                                                                                                                 |                                 |                              |                                 | P_trifoliata_00708_mRNA_3,1  |
| GF0050326 | 0                            | 0                         | 1                            | Hypothetical protein (1)                            |                                                                                                                                                                                                                                                                                                      |                                                                                                                                                                                                                                                                                                                                                                                 |                                 |                              |                                 | P_trifoliata_00708_mRNA_2,1  |
| GF0050325 | 0                            | 0                         | 1                            | Hypothetical protein (1)                            |                                                                                                                                                                                                                                                                                                      |                                                                                                                                                                                                                                                                                                                                                                                 |                                 |                              |                                 | P_trifoliata_00708_mRNA_15,1 |
| GF0050324 | 0                            | 0                         | 1                            | Hypothetical protein (1)                            |                                                                                                                                                                                                                                                                                                      |                                                                                                                                                                                                                                                                                                                                                                                 |                                 |                              |                                 | P_trifoliata_00708_mRNA_1,1  |
| GF0050323 | 0                            | 0                         | 1                            | Hypothetical protein (1)                            | protein serine/threonine kinase activity [GO:0004674 molecular_function] (1); protein binding [GO:0005515 molecular_function] (1)                                                                                                                                                                    | WD40-repeat-containing domain [IPR017986] (1); S-locus receptor kinase, C-terminal [IPR012320] (1); WD40-YVTN repeat-like-containing domain [IPR015943] (1); Protein kinase-like domain [IPR011009] (1)                                                                                                                                                                         |                                 |                              |                                 | P_trifoliata_00707_mRNA_9,1  |
| GF0050322 | 0                            | 0                         | 1                            | Hypothetical protein (1)                            | protein binding [GO:0005515 molecular_function] (1)                                                                                                                                                                                                                                                  | Leucine-rich repeat domain, L domain-like [IPR032675] (1); Leucine-rich repeat [IPR001611] (1)                                                                                                                                                                                                                                                                                  |                                 |                              |                                 | P_trifoliata_00707_mRNA_8,1  |
| GF0050321 | 0                            | 0                         | 1                            | Male germ cell-associated kinase (1)                | protein kinase activity [GO:0004672 molecular_function] (1); protein phosphorylation [GO:0006468 biological_process] (1); ATP binding [GO:000524 molecular_function] (1)                                                                                                                             | Protein kinase domain [IPR000719] (1); Protein kinase-like domain [IPR011009] (1); Serine/threonine-protein kinase, active site [IPR008271] (1); Serine/threonine/tyrosine specificity protein kinase, catalytic domain [IPR002290] (1)                                                                                                                                         |                                 |                              |                                 | P_trifoliata_00707_mRNA_5,1  |
| GF0050220 | 0                            | 0                         | 1                            | Hypothetical protein (1)                            |                                                                                                                                                                                                                                                                                                      | Pentatricopeptide repeat [IPR002885] (1)                                                                                                                                                                                                                                                                                                                                        |                                 |                              |                                 | P_trifoliata_00707_mRNA_3,1  |
| GF0050319 | 0                            | 0                         | 1                            | UPF0481 protein (1)                                 |                                                                                                                                                                                                                                                                                                      | Protein of unknown function DUF247, plant [IPR004158] (1)                                                                                                                                                                                                                                                                                                                       |                                 |                              |                                 | P_trifoliata_00707_mRNA_2,1  |
| GF0050318 | 0                            | 0                         | 1                            | UPF0481 protein (1)                                 |                                                                                                                                                                                                                                                                                                      | Protein of unknown function DUF247, plant [IPR004158] (1)                                                                                                                                                                                                                                                                                                                       |                                 |                              |                                 | P_trifoliata_00707_mRNA_1,1  |
| GF0050317 | 0                            | 0                         | 1                            | Hypothetical protein (1)                            |                                                                                                                                                                                                                                                                                                      |                                                                                                                                                                                                                                                                                                                                                                                 |                                 |                              |                                 | P_trifoliata_00706_mRNA_15,1 |
| GF0050316 | 0                            | 0                         | 1                            | Hypothetical protein (1)                            |                                                                                                                                                                                                                                                                                                      | Transposase, MuDR, plant [IPR004332] (1)                                                                                                                                                                                                                                                                                                                                        |                                 |                              |                                 | P_trifoliata_00706_mRNA_11,1 |
| GF0050315 | 0                            | 0                         | 1                            | Hypothetical protein (1)                            |                                                                                                                                                                                                                                                                                                      |                                                                                                                                                                                                                                                                                                                                                                                 |                                 |                              |                                 | P_trifoliata_00706_mRNA_10,1 |
| GF0050314 | 0                            | 0                         | 1                            | Hypothetical protein (1)                            |                                                                                                                                                                                                                                                                                                      |                                                                                                                                                                                                                                                                                                                                                                                 |                                 |                              |                                 | P_trifoliata_00706_mRNA_1,1  |
| GF0050313 | 0                            | 0                         | 1                            | Hypothetical protein (1)                            |                                                                                                                                                                                                                                                                                                      |                                                                                                                                                                                                                                                                                                                                                                                 |                                 |                              |                                 | P_trifoliata_00705_mRNA_7,1  |
| GF0050312 | 0                            | 0                         | 1                            | Hypothetical protein (1)                            | zinc ion binding [GO:0008270 molecular_function] (1); nucleic acid binding [GO:0003676 molecular_function] (1)                                                                                                                                                                                       | Zinc finger, CCHC-type [IPR001878] (1)                                                                                                                                                                                                                                                                                                                                          |                                 |                              |                                 | P_trifoliata_00705_mRNA_6,1  |
| GF0050311 | 0                            | 0                         | 1                            | Hypothetical protein (1)                            |                                                                                                                                                                                                                                                                                                      |                                                                                                                                                                                                                                                                                                                                                                                 |                                 |                              |                                 | P_trifoliata_00705_mRNA_4,1  |
| GF0050310 | 0                            | 0                         | 1                            | Hypothetical protein (1)                            |                                                                                                                                                                                                                                                                                                      |                                                                                                                                                                                                                                                                                                                                                                                 |                                 |                              |                                 | P_trifoliata_00705_mRNA_1,1  |
| GF0050309 | 0                            | 0                         | 1                            | Hypothetical protein (1)                            |                                                                                                                                                                                                                                                                                                      |                                                                                                                                                                                                                                                                                                                                                                                 |                                 |                              |                                 | P_trifoliata_00704_mRNA_4,1  |
| GF0050308 | 0                            | 0                         | 1                            | Hypothetical protein (1)                            |                                                                                                                                                                                                                                                                                                      |                                                                                                                                                                                                                                                                                                                                                                                 |                                 |                              |                                 | P_trifoliata_00704_mRNA_1,1  |
| GF0050307 | 0                            | 0                         | 1                            | Hypothetical protein (1)                            |                                                                                                                                                                                                                                                                                                      |                                                                                                                                                                                                                                                                                                                                                                                 |                                 |                              |                                 | P_trifoliata_00703_mRNA_16,1 |
| GF0050306 | 0                            | 0                         | 1                            | Alpha N-terminal protein methyltransferase 1 (1)    | methyltransferase activity [GO:0008168 molecular_function] (1); N-terminal protein amino acid methylation [GO:0006480 biological_process] (1)                                                                                                                                                        | Alpha-N-methyltransferase NTM1 [IPR008576] (1); S-adenosyl-L-methionine-dependent methyltransferase [IPR029063] (1)                                                                                                                                                                                                                                                             |                                 |                              |                                 | P_trifoliata_00703_mRNA_15,1 |
| GF0050305 | 0                            | 0                         | 1                            | Hypothetical protein (1)                            | protein dimerization activity [GO:0006483 molecular_function] (1); proteolysis [GO:0006508 biological_process] (1)                                                                                                                                                                                   | Ulp1 protease family, C-terminal catalytic domain [IPR003653] (1)                                                                                                                                                                                                                                                                                                               |                                 |                              |                                 | P_trifoliata_00703_mRNA_14,1 |
| GF0050304 | 0                            | 0                         | 1                            | Hypothetical protein (1)                            | protein dimerization activity [GO:0006483 molecular_function] (1)                                                                                                                                                                                                                                    | Mye-type, basic helix-loop-helix (bHLH) domain [IPR011598] (1)                                                                                                                                                                                                                                                                                                                  |                                 |                              |                                 | P_trifoliata_00703_mRNA_13,1 |
| GF0050303 | 0                            | 0                         | 1                            | Hypothetical protein (1)                            |                                                                                                                                                                                                                                                                                                      |                                                                                                                                                                                                                                                                                                                                                                                 |                                 |                              |                                 | P_trifoliata_00702_mRNA_9,1  |
| GF0050302 | 0                            | 0                         | 1                            | Pathogenesis-related family protein isoform 1 (1)   |                                                                                                                                                                                                                                                                                                      | NTF2-like domain [IPR032710] (1)                                                                                                                                                                                                                                                                                                                                                |                                 |                              |                                 | P_trifoliata_00702_mRNA_8,1  |
| GF0050301 | 0                            | 0                         | 1                            | Hypothetical protein (1)                            |                                                                                                                                                                                                                                                                                                      |                                                                                                                                                                                                                                                                                                                                                                                 |                                 |                              |                                 | P_trifoliata_00702_mRNA_5,1  |
| GF0050300 | 0                            | 0                         | 1                            | Hypothetical protein (1)                            |                                                                                                                                                                                                                                                                                                      |                                                                                                                                                                                                                                                                                                                                                                                 |                                 |                              |                                 | P_trifoliata_00702_mRNA_19,1 |

| ID        | Num. in <i>C. celastroides</i> | Num. in <i>C. umbellata</i> | Num. in <i>P. trifoliata</i> | Note                                                             | GO                                                                                                                                                                                                                                                                                                                | InterPro                                                                                                                                                                                                                                       | Members in <i>C. celastroides</i> | Members in <i>C. umbellata</i> | Members in <i>P. trifoliata</i> |
|-----------|--------------------------------|-----------------------------|------------------------------|------------------------------------------------------------------|-------------------------------------------------------------------------------------------------------------------------------------------------------------------------------------------------------------------------------------------------------------------------------------------------------------------|------------------------------------------------------------------------------------------------------------------------------------------------------------------------------------------------------------------------------------------------|-----------------------------------|--------------------------------|---------------------------------|
| GF0050299 | 0                              | 0                           | 1                            | Hypothetical protein (1)                                         |                                                                                                                                                                                                                                                                                                                   |                                                                                                                                                                                                                                                | -                                 | -                              | P_trifoliata_00702_mRNA_14,1    |
| GF0050298 | 0                              | 0                           | 1                            | Hypothetical protein (1)                                         |                                                                                                                                                                                                                                                                                                                   |                                                                                                                                                                                                                                                | -                                 | -                              | P_trifoliata_00701_mRNA_6,1     |
| GF0050297 | 0                              | 0                           | 1                            | Hypothetical protein (1)                                         |                                                                                                                                                                                                                                                                                                                   |                                                                                                                                                                                                                                                | -                                 | -                              | P_trifoliata_00701_mRNA_2,1     |
| GF0050296 | 0                              | 0                           | 1                            | SUN domain-containing protein 1 (1)                              |                                                                                                                                                                                                                                                                                                                   | SUN domain [IPR012919] (1)                                                                                                                                                                                                                     | -                                 | -                              | P_trifoliata_00700_mRNA_9,1     |
| GF0050295 | 0                              | 0                           | 1                            | Hypothetical protein (1)                                         |                                                                                                                                                                                                                                                                                                                   |                                                                                                                                                                                                                                                | -                                 | -                              | P_trifoliata_00700_mRNA_3,1     |
| GF0050294 | 0                              | 0                           | 1                            | Hypothetical protein (1)                                         | membrane [GO:0016020]<br>cellular_component (1)                                                                                                                                                                                                                                                                   | Calcium-dependent channel, TTM region, putative phosphate [IPR003864] (1)                                                                                                                                                                      | -                                 | -                              | P_trifoliata_00700_mRNA_2,1     |
| GF0050293 | 0                              | 0                           | 1                            | Hypothetical protein (1)                                         |                                                                                                                                                                                                                                                                                                                   |                                                                                                                                                                                                                                                | -                                 | -                              | P_trifoliata_00699_mRNA_12,1    |
| GF0050292 | 0                              | 0                           | 1                            | Hypothetical protein (1)                                         |                                                                                                                                                                                                                                                                                                                   |                                                                                                                                                                                                                                                | -                                 | -                              | P_trifoliata_00699_mRNA_11,1    |
| GF0050291 | 0                              | 0                           | 1                            | GlaA (1)                                                         | carbohydrate metabolic process [GO:0005975 biological_process] (1); hydrolase activity, hydrolyzing O-glycosyl compounds [GO:0004553 molecular_function] (1)                                                                                                                                                      | Glycoside hydrolase superfamily [IPR017853] (1); Glycoside hydrolase, family 3, N-terminal [IPR001764] (1); Glycoside hydrolase family 3 [IPR026892] (1)                                                                                       | -                                 | -                              | P_trifoliata_00699_mRNA_1,1     |
| GF0050290 | 0                              | 0                           | 1                            | Cytokinin riboside 5'-monophosphate phosphoribohydrolase (1)     |                                                                                                                                                                                                                                                                                                                   | LOG family [IPR031100] (1)                                                                                                                                                                                                                     | -                                 | -                              | P_trifoliata_00698_mRNA_9,1     |
| GF0050289 | 0                              | 0                           | 1                            | Hypothetical protein (1)                                         |                                                                                                                                                                                                                                                                                                                   |                                                                                                                                                                                                                                                | -                                 | -                              | P_trifoliata_00698_mRNA_8,1     |
| GF0050288 | 0                              | 0                           | 1                            | Hypothetical protein (1)                                         |                                                                                                                                                                                                                                                                                                                   |                                                                                                                                                                                                                                                | -                                 | -                              | P_trifoliata_00698_mRNA_7,1     |
| GF0050287 | 0                              | 0                           | 1                            | Hypothetical protein (1)                                         |                                                                                                                                                                                                                                                                                                                   |                                                                                                                                                                                                                                                | -                                 | -                              | P_trifoliata_00698_mRNA_5,1     |
| GF0050286 | 0                              | 0                           | 1                            | Hypothetical protein (1)                                         |                                                                                                                                                                                                                                                                                                                   |                                                                                                                                                                                                                                                | -                                 | -                              | P_trifoliata_00698_mRNA_1,1     |
| GF0050285 | 0                              | 0                           | 1                            | Hypothetical protein (1)                                         |                                                                                                                                                                                                                                                                                                                   |                                                                                                                                                                                                                                                | -                                 | -                              | P_trifoliata_00697_mRNA_8,1     |
| GF0050284 | 0                              | 0                           | 1                            | Hypothetical protein (1)                                         |                                                                                                                                                                                                                                                                                                                   |                                                                                                                                                                                                                                                | -                                 | -                              | P_trifoliata_00697_mRNA_7,1     |
| GF0050283 | 0                              | 0                           | 1                            | Hypothetical protein (1)                                         |                                                                                                                                                                                                                                                                                                                   |                                                                                                                                                                                                                                                | -                                 | -                              | P_trifoliata_00697_mRNA_6,1     |
| GF0050282 | 0                              | 0                           | 1                            | Hypothetical protein (1)                                         |                                                                                                                                                                                                                                                                                                                   |                                                                                                                                                                                                                                                | -                                 | -                              | P_trifoliata_00697_mRNA_5,1     |
| GF0050281 | 0                              | 0                           | 1                            | Hypothetical protein (1)                                         |                                                                                                                                                                                                                                                                                                                   |                                                                                                                                                                                                                                                | -                                 | -                              | P_trifoliata_00697_mRNA_2,1     |
| GF0050280 | 0                              | 0                           | 1                            | Hypothetical protein (1)                                         |                                                                                                                                                                                                                                                                                                                   |                                                                                                                                                                                                                                                | -                                 | -                              | P_trifoliata_00697_mRNA_15,1    |
| GF0050279 | 0                              | 0                           | 1                            | Hypothetical protein (1)                                         |                                                                                                                                                                                                                                                                                                                   |                                                                                                                                                                                                                                                | -                                 | -                              | P_trifoliata_00697_mRNA_12,1    |
| GF0050278 | 0                              | 0                           | 1                            | Hypothetical protein (1)                                         |                                                                                                                                                                                                                                                                                                                   | Protein of unknown function DUF247, plant [IPR004158] (1)                                                                                                                                                                                      | -                                 | -                              | P_trifoliata_00697_mRNA_10,1    |
| GF0050277 | 0                              | 0                           | 1                            | Hypothetical protein (1)                                         |                                                                                                                                                                                                                                                                                                                   |                                                                                                                                                                                                                                                | -                                 | -                              | P_trifoliata_00696_mRNA_8,1     |
| GF0050276 | 0                              | 0                           | 1                            | Hypothetical protein (1)                                         | DNA binding [GO:0003677 molecular_function] (1); regulation of transcription, DNA-templated [GO:0006355 biological_process] (1)                                                                                                                                                                                   | NAC domain [IPR003441] (1)                                                                                                                                                                                                                     | -                                 | -                              | P_trifoliata_00696_mRNA_7,1     |
| GF0050275 | 0                              | 0                           | 1                            | Hypothetical protein (1)                                         |                                                                                                                                                                                                                                                                                                                   |                                                                                                                                                                                                                                                | -                                 | -                              | P_trifoliata_00696_mRNA_4,1     |
| GF0050274 | 0                              | 0                           | 1                            | Hypothetical protein (1)                                         |                                                                                                                                                                                                                                                                                                                   |                                                                                                                                                                                                                                                | -                                 | -                              | P_trifoliata_00696_mRNA_2,1     |
| GF0050273 | 0                              | 0                           | 1                            | Hypothetical protein (1)                                         | regulation of transcription, DNA-templated [GO:0006355 biological_process] (1); DNA binding [GO:0003677 molecular_function] (1)                                                                                                                                                                                   | NAC domain [IPR003441] (1)                                                                                                                                                                                                                     | -                                 | -                              | P_trifoliata_00696_mRNA_13,1    |
| GF0050272 | 0                              | 0                           | 1                            | Hypothetical protein (1)                                         |                                                                                                                                                                                                                                                                                                                   |                                                                                                                                                                                                                                                | -                                 | -                              | P_trifoliata_00696_mRNA_10,1    |
| GF0050271 | 0                              | 0                           | 1                            | Hypothetical protein (1)                                         |                                                                                                                                                                                                                                                                                                                   |                                                                                                                                                                                                                                                | -                                 | -                              | P_trifoliata_00696_mRNA_1,1     |
| GF0050270 | 0                              | 0                           | 1                            | Hypothetical protein (1)                                         |                                                                                                                                                                                                                                                                                                                   |                                                                                                                                                                                                                                                | -                                 | -                              | P_trifoliata_00695_mRNA_9,1     |
| GF0050269 | 0                              | 0                           | 1                            | Hypothetical protein (1)                                         | protein binding [GO:0005515 molecular_function] (1)                                                                                                                                                                                                                                                               | PGG domain [IPR026961] (1); Ankyrin repeat-containing domain [IPR020683] (1); Ankyrin repeat [IPR002110] (1)                                                                                                                                   | -                                 | -                              | P_trifoliata_00695_mRNA_8,1     |
| GF0050268 | 0                              | 0                           | 1                            | Hypothetical protein (1)                                         |                                                                                                                                                                                                                                                                                                                   |                                                                                                                                                                                                                                                | -                                 | -                              | P_trifoliata_00695_mRNA_7,1     |
| GF0050267 | 0                              | 0                           | 1                            | Hypothetical protein (1)                                         |                                                                                                                                                                                                                                                                                                                   |                                                                                                                                                                                                                                                | -                                 | -                              | P_trifoliata_00695_mRNA_6,1     |
| GF0050266 | 0                              | 0                           | 1                            | Hypothetical protein (1)                                         |                                                                                                                                                                                                                                                                                                                   |                                                                                                                                                                                                                                                | -                                 | -                              | P_trifoliata_00695_mRNA_5,1     |
| GF0050265 | 0                              | 0                           | 1                            | AT4g02470 protein (1)                                            | ATP binding [GO:0005524 molecular_function] (1)                                                                                                                                                                                                                                                                   | AAA+ ATPase domain [IPR003593] (1); P-loop containing nucleoside triphosphate hydrolase [IPR027417] (1); ATPase, AAA-type, core [IPR003959] (1); ATPase, AAA-type, conserved site [IPR03960] (1)                                               | -                                 | -                              | P_trifoliata_00695_mRNA_4,1     |
| GF0050264 | 0                              | 0                           | 1                            | Ankyrin repeat family protein (1)                                |                                                                                                                                                                                                                                                                                                                   | PGG domain [IPR026961] (1)                                                                                                                                                                                                                     | -                                 | -                              | P_trifoliata_00695_mRNA_12,1    |
| GF0050263 | 0                              | 0                           | 1                            | Hypothetical protein (1)                                         | protein binding [GO:0005515 molecular_function] (1)                                                                                                                                                                                                                                                               | Ankyrin repeat-containing domain [IPR020683] (1); Ankyrin repeat [IPR002110] (1)                                                                                                                                                               | -                                 | -                              | P_trifoliata_00695_mRNA_11,1    |
| GF0050262 | 0                              | 0                           | 1                            | Hypothetical protein (1)                                         |                                                                                                                                                                                                                                                                                                                   |                                                                                                                                                                                                                                                | -                                 | -                              | P_trifoliata_00695_mRNA_10,1    |
| GF0050261 | 0                              | 0                           | 1                            | ATPase family AAA domain-containing protein 1-A (1)              | ATP binding [GO:0005524 molecular_function] (1)                                                                                                                                                                                                                                                                   | ATPase, AAA-type, conserved site [IPR03960] (1); ATPase, AAA-type, core [IPR003959] (1); P-loop containing nucleoside triphosphate hydrolase [IPR027417] (1); AAA+ ATPase domain [IPR03593] (1)                                                | -                                 | -                              | P_trifoliata_00695_mRNA_1,1     |
| GF0050260 | 0                              | 0                           | 1                            | Hypothetical protein (1)                                         |                                                                                                                                                                                                                                                                                                                   |                                                                                                                                                                                                                                                | -                                 | -                              | P_trifoliata_00694_mRNA_3,1     |
| GF0050259 | 0                              | 0                           | 1                            | Hypothetical protein (1)                                         |                                                                                                                                                                                                                                                                                                                   |                                                                                                                                                                                                                                                | -                                 | -                              | P_trifoliata_00694_mRNA_2,1     |
| GF0050258 | 0                              | 0                           | 1                            | Hypothetical protein (1)                                         |                                                                                                                                                                                                                                                                                                                   |                                                                                                                                                                                                                                                | -                                 | -                              | P_trifoliata_00694_mRNA_1,1     |
| GF0050257 | 0                              | 0                           | 1                            | Hypothetical protein (1)                                         |                                                                                                                                                                                                                                                                                                                   |                                                                                                                                                                                                                                                | -                                 | -                              | P_trifoliata_00693_mRNA_8,1     |
| GF0050256 | 0                              | 0                           | 1                            | Hypothetical protein (1)                                         |                                                                                                                                                                                                                                                                                                                   |                                                                                                                                                                                                                                                | -                                 | -                              | P_trifoliata_00693_mRNA_6,1     |
| GF0050255 | 0                              | 0                           | 1                            | Receptor-like cytosolic serine/threonine-protein kinase RBK2 (1) | ATP binding [GO:0005524 molecular_function] (1); protein phosphorylation [GO:0006468 biological_process] (1); protein kinase activity [GO:0004672 molecular_function] (1)                                                                                                                                         | Serine/threonine/dual specificity protein kinase, catalytic domain [IPR002290] (1); Serine/threonine-protein kinase, active site [IPR008271] (1); Protein kinase domain [IPR000719] (1); Protein kinase-like domain [IPR011009] (1)            | -                                 | -                              | P_trifoliata_00693_mRNA_5,1     |
| GF0050254 | 0                              | 0                           | 1                            | Hypothetical protein (1)                                         |                                                                                                                                                                                                                                                                                                                   |                                                                                                                                                                                                                                                | -                                 | -                              | P_trifoliata_00693_mRNA_4,1     |
| GF0050253 | 0                              | 0                           | 1                            | Cytokinin riboside 5'-monophosphate phosphoribohydrolase (1)     |                                                                                                                                                                                                                                                                                                                   |                                                                                                                                                                                                                                                | -                                 | -                              | P_trifoliata_00692_mRNA_9,1     |
| GF0050252 | 0                              | 0                           | 1                            | Hypothetical protein (1)                                         |                                                                                                                                                                                                                                                                                                                   |                                                                                                                                                                                                                                                | -                                 | -                              | P_trifoliata_00692_mRNA_8,1     |
| GF0050251 | 0                              | 0                           | 1                            | Hypothetical protein (1)                                         | methylesterase activity [GO:0008168 molecular_function] (1); O-methyltransferase activity [GO:0008171 molecular_function] (1)                                                                                                                                                                                     | O-methyltransferase, family 2 [IPR01077] (1); Transposase, MuDR, plant [IPR04332] (1); O-methyltransferase COMT-type [IPR016461] (1); S-adenosyl-L-methionine-dependent methyltransferase [IPR029063] (1)                                      | -                                 | -                              | P_trifoliata_00692_mRNA_7,1     |
| GF0050250 | 0                              | 0                           | 1                            | Hypothetical protein (1)                                         | proteolysis [GO:0006508 biological_process] (1); cysteine-type peptidase activity [GO:0008234 molecular_function] (1)                                                                                                                                                                                             | Ulp1 protease family, C-terminal catalytic domain [IPR03653] (1)                                                                                                                                                                               | -                                 | -                              | P_trifoliata_00692_mRNA_5,1     |
| GF0050249 | 0                              | 0                           | 1                            | Hypothetical protein (1)                                         |                                                                                                                                                                                                                                                                                                                   |                                                                                                                                                                                                                                                | -                                 | -                              | P_trifoliata_00692_mRNA_15,1    |
| GF0050248 | 0                              | 0                           | 1                            | Hypothetical protein (1)                                         |                                                                                                                                                                                                                                                                                                                   |                                                                                                                                                                                                                                                | -                                 | -                              | P_trifoliata_00692_mRNA_14,1    |
| GF0050247 | 0                              | 0                           | 1                            | Hypothetical protein (1)                                         |                                                                                                                                                                                                                                                                                                                   |                                                                                                                                                                                                                                                | -                                 | -                              | P_trifoliata_00692_mRNA_13,1    |
| GF0050246 | 0                              | 0                           | 1                            | Hypothetical protein (1)                                         |                                                                                                                                                                                                                                                                                                                   |                                                                                                                                                                                                                                                | -                                 | -                              | P_trifoliata_00692_mRNA_10,1    |
| GF0050245 | 0                              | 0                           | 1                            | Hypothetical protein (1)                                         |                                                                                                                                                                                                                                                                                                                   |                                                                                                                                                                                                                                                | -                                 | -                              | P_trifoliata_00692_mRNA_1,1     |
| GF0050244 | 0                              | 0                           | 1                            | Hypothetical protein (1)                                         |                                                                                                                                                                                                                                                                                                                   | Gag polyprotein of LTR copia-type [IPR029472] (1)                                                                                                                                                                                              | -                                 | -                              | P_trifoliata_00691_mRNA_7,1     |
| GF0050243 | 0                              | 0                           | 1                            | Cytochrome P450 (1)                                              | oxidoreductase activity, acting on paired donors, with incorporation or reduction of molecular oxygen [GO:0016705 molecular_function] (1); oxidation-reduction process [GO:0055114 biological_process] (1); heme binding [GO:000037 molecular_function] (1); iron ion binding [GO:0005506 molecular_function] (1) | Cytochrome P450 [IPR01128] (1); Cytochrome P450, conserved site [IPR017972] (1); Cytochrome P450, E-class, group 1 [IPR02401] (1)                                                                                                              | -                                 | -                              | P_trifoliata_00691_mRNA_6,1     |
| GF0050242 | 0                              | 0                           | 1                            | Hypothetical protein (1)                                         |                                                                                                                                                                                                                                                                                                                   |                                                                                                                                                                                                                                                | -                                 | -                              | P_trifoliata_00691_mRNA_4,1     |
| GF0050241 | 0                              | 0                           | 1                            | Zinc finger protein-like protein (1)                             | zinc ion binding [GO:0008270 molecular_function] (1); protein binding [GO:0005515 molecular_function] (1)                                                                                                                                                                                                         | Haemerythrin-like [IPR012312] (1); Zinc finger, C1Y-type [IPR008913] (1); Zinc finger, RING-type [IPR001841] (1); Zinc finger, RING FYVE/PHD-type [IPR013083] (1); Ribosecan-type fold [IPR04039] (1); Zinc finger, CTCHY-type [IPR017921] (1) | -                                 | -                              | P_trifoliata_00691_mRNA_2,1     |
| GF0050240 | 0                              | 0                           | 1                            | Ribosomal protein S7e (1)                                        | ribosome [GO:0005840 cellular_component] (1); intracellular [GO:0005622 cellular_component] (1); translation [GO:0006412 biological_process] (1); structural constituent of ribosome [GO:0003735 molecular_function] (1)                                                                                          | Bifunctional inhibitor/plant lipid transfer protein/seed storage helical domain [IPR016140] (1); Ribosomal protein S7e [IPR000554] (1); Helicobacter seed protein [IPR027923] (1)                                                              | -                                 | -                              | P_trifoliata_00690_mRNA_7,1     |
| GF0050239 | 0                              | 0                           | 1                            | Hypothetical protein (1)                                         |                                                                                                                                                                                                                                                                                                                   |                                                                                                                                                                                                                                                | -                                 | -                              | P_trifoliata_00690_mRNA_3,1     |
| GF0050238 | 0                              | 0                           | 1                            | Hypothetical protein (1)                                         |                                                                                                                                                                                                                                                                                                                   |                                                                                                                                                                                                                                                | -                                 | -                              | P_trifoliata_00690_mRNA_2,1     |
| GF0050237 | 0                              | 0                           | 1                            | Hypothetical protein (1)                                         | DNA binding [GO:0003677 molecular_function] (1); regulation of transcription, DNA-templated [GO:0006355 biological_process] (1)                                                                                                                                                                                   | NAC domain [IPR003441] (1)                                                                                                                                                                                                                     | -                                 | -                              | P_trifoliata_00690_mRNA_14,1    |
| GF0050236 | 0                              | 0                           | 1                            | Hypothetical protein (1)                                         |                                                                                                                                                                                                                                                                                                                   |                                                                                                                                                                                                                                                | -                                 | -                              | P_trifoliata_00690_mRNA_11,1    |
| GF0050235 | 0                              | 0                           | 1                            | Hypothetical protein (1)                                         |                                                                                                                                                                                                                                                                                                                   |                                                                                                                                                                                                                                                | -                                 | -                              | P_trifoliata_00690_mRNA_1,1     |
| GF0050234 | 0                              | 0                           | 1                            | Hypothetical protein (1)                                         |                                                                                                                                                                                                                                                                                                                   |                                                                                                                                                                                                                                                | -                                 | -                              | P_trifoliata_00689_mRNA_8,1     |
| GF0050233 | 0                              | 0                           | 1                            | Hypothetical protein (1)                                         |                                                                                                                                                                                                                                                                                                                   |                                                                                                                                                                                                                                                | -                                 | -                              | P_trifoliata_00689_mRNA_7,1     |
| GF0050232 | 0                              | 0                           | 1                            | Hypothetical protein (1)                                         |                                                                                                                                                                                                                                                                                                                   |                                                                                                                                                                                                                                                | -                                 | -                              | P_trifoliata_00689_mRNA_6,1     |
| GF0050231 | 0                              | 0                           | 1                            | Hypothetical protein (1)                                         |                                                                                                                                                                                                                                                                                                                   |                                                                                                                                                                                                                                                | -                                 | -                              | P_trifoliata_00689_mRNA_2,1     |
| GF0050230 | 0                              | 0                           | 1                            | Hypothetical protein (1)                                         |                                                                                                                                                                                                                                                                                                                   |                                                                                                                                                                                                                                                | -                                 | -                              | P_trifoliata_00689_mRNA_15,1    |
| GF0050229 | 0                              | 0                           | 1                            | Hypothetical protein (1)                                         |                                                                                                                                                                                                                                                                                                                   |                                                                                                                                                                                                                                                | -                                 | -                              | P_trifoliata_00689_mRNA_13,1    |
| GF0050228 | 0                              | 0                           | 1                            | Hypothetical protein (1)                                         |                                                                                                                                                                                                                                                                                                                   |                                                                                                                                                                                                                                                | -                                 | -                              | P_trifoliata_00689_mRNA_12,1    |
| GF0050227 | 0                              | 0                           | 1                            | Hypothetical protein (1)                                         |                                                                                                                                                                                                                                                                                                                   |                                                                                                                                                                                                                                                | -                                 | -                              | P_trifoliata_00689_mRNA_11,1    |
| GF0050226 | 0                              | 0                           | 1                            | Hypothetical protein (1)                                         | aspartic-type endopeptidase activity [GO:0000190 molecular_function] (1); proteolysis [GO:0006508 biological_process] (1)                                                                                                                                                                                         | Retropapsin [IPR018061] (1); Peptidase A2A, retrovirus, catalytic [IPR001993] (1); Aspartic peptidase domain [IPR021109] (1)                                                                                                                   | -                                 | -                              | P_trifoliata_00689_mRNA_1,1     |

| ID        | Num. in <i>C. clematulae</i> | Num. in <i>C. anthra</i> | Num. in <i>P. trifolium</i> | Note                                                                    | GO                                                                                                                                                                                                                                                                                                                                                                                                                                                                                                                                                                                                                                                                          | InterPro                                                                                                                                                                                                                                                                                                                          | Members in <i>C. clematulae</i> | Members in <i>C. anthra</i> | Members in <i>P. trifolium</i> |
|-----------|------------------------------|--------------------------|-----------------------------|-------------------------------------------------------------------------|-----------------------------------------------------------------------------------------------------------------------------------------------------------------------------------------------------------------------------------------------------------------------------------------------------------------------------------------------------------------------------------------------------------------------------------------------------------------------------------------------------------------------------------------------------------------------------------------------------------------------------------------------------------------------------|-----------------------------------------------------------------------------------------------------------------------------------------------------------------------------------------------------------------------------------------------------------------------------------------------------------------------------------|---------------------------------|-----------------------------|--------------------------------|
| GF0050225 | 0                            | 0                        | 0                           | 1 cDNA clone:002-112-E03, full insert sequence (1)                      |                                                                                                                                                                                                                                                                                                                                                                                                                                                                                                                                                                                                                                                                             |                                                                                                                                                                                                                                                                                                                                   | -                               | -                           | P_trifoliata_00688_mRNA_7,1    |
| GF0050224 | 0                            | 0                        | 0                           | 1 Hypothetical protein (1)                                              | zinc ion binding [GO:0008270]<br>molecular_function (1); nucleic acid binding [GO:0003676]<br>molecular_function (1)                                                                                                                                                                                                                                                                                                                                                                                                                                                                                                                                                        | Zinc finger, CCHC-type [IPR01878] (1)                                                                                                                                                                                                                                                                                             | -                               | -                           | P_trifoliata_00688_mRNA_6,1    |
| GF0050223 | 0                            | 0                        | 0                           | 1 Hypothetical protein (1)                                              |                                                                                                                                                                                                                                                                                                                                                                                                                                                                                                                                                                                                                                                                             |                                                                                                                                                                                                                                                                                                                                   | -                               | -                           | P_trifoliata_00688_mRNA_20,1   |
| GF0050222 | 0                            | 0                        | 0                           | 1 Hypothetical protein (1)                                              |                                                                                                                                                                                                                                                                                                                                                                                                                                                                                                                                                                                                                                                                             |                                                                                                                                                                                                                                                                                                                                   | -                               | -                           | P_trifoliata_00688_mRNA_18,1   |
| GF0050221 | 0                            | 0                        | 0                           | 1 Hypothetical protein (1)                                              |                                                                                                                                                                                                                                                                                                                                                                                                                                                                                                                                                                                                                                                                             |                                                                                                                                                                                                                                                                                                                                   | -                               | -                           | P_trifoliata_00688_mRNA_12,1   |
| GF0050220 | 0                            | 0                        | 0                           | 1 Hypothetical protein (1)                                              |                                                                                                                                                                                                                                                                                                                                                                                                                                                                                                                                                                                                                                                                             | Viral movement protein [IPR028919] (1)                                                                                                                                                                                                                                                                                            | -                               | -                           | P_trifoliata_00688_mRNA_11,1   |
| GF0050219 | 0                            | 0                        | 0                           | 1 Hypothetical protein (1)                                              |                                                                                                                                                                                                                                                                                                                                                                                                                                                                                                                                                                                                                                                                             |                                                                                                                                                                                                                                                                                                                                   | -                               | -                           | P_trifoliata_00688_mRNA_1,1    |
| GF0050218 | 0                            | 0                        | 0                           | 1 Hypothetical protein (1)                                              |                                                                                                                                                                                                                                                                                                                                                                                                                                                                                                                                                                                                                                                                             |                                                                                                                                                                                                                                                                                                                                   | -                               | -                           | P_trifoliata_00687_mRNA_11,1   |
| GF0050217 | 0                            | 0                        | 0                           | 1 Hypothetical protein (1)                                              |                                                                                                                                                                                                                                                                                                                                                                                                                                                                                                                                                                                                                                                                             |                                                                                                                                                                                                                                                                                                                                   | -                               | -                           | P_trifoliata_00686_mRNA_21,1   |
| GF0050216 | 0                            | 0                        | 0                           | 1 Hypothetical protein (1)                                              |                                                                                                                                                                                                                                                                                                                                                                                                                                                                                                                                                                                                                                                                             |                                                                                                                                                                                                                                                                                                                                   | -                               | -                           | P_trifoliata_00686_mRNA_20,1   |
| GF0050215 | 0                            | 0                        | 0                           | 1 Hypothetical protein (1)                                              |                                                                                                                                                                                                                                                                                                                                                                                                                                                                                                                                                                                                                                                                             |                                                                                                                                                                                                                                                                                                                                   | -                               | -                           | P_trifoliata_00686_mRNA_2,1    |
| GF0050214 | 0                            | 0                        | 0                           | 1 Hypothetical protein (1)                                              |                                                                                                                                                                                                                                                                                                                                                                                                                                                                                                                                                                                                                                                                             |                                                                                                                                                                                                                                                                                                                                   | -                               | -                           | P_trifoliata_00686_mRNA_19,1   |
| GF0050213 | 0                            | 0                        | 0                           | 1 Hypothetical protein (1)                                              |                                                                                                                                                                                                                                                                                                                                                                                                                                                                                                                                                                                                                                                                             |                                                                                                                                                                                                                                                                                                                                   | -                               | -                           | P_trifoliata_00686_mRNA_18,1   |
| GF0050212 | 0                            | 0                        | 0                           | 1 Hypothetical protein (1)                                              |                                                                                                                                                                                                                                                                                                                                                                                                                                                                                                                                                                                                                                                                             | Viral movement protein [IPR028919] (1)                                                                                                                                                                                                                                                                                            | -                               | -                           | P_trifoliata_00686_mRNA_17,1   |
| GF0050211 | 0                            | 0                        | 0                           | 1 Hypothetical protein (1)                                              |                                                                                                                                                                                                                                                                                                                                                                                                                                                                                                                                                                                                                                                                             |                                                                                                                                                                                                                                                                                                                                   | -                               | -                           | P_trifoliata_00686_mRNA_16,1   |
| GF0050210 | 0                            | 0                        | 0                           | 1 Hypothetical protein (1)                                              |                                                                                                                                                                                                                                                                                                                                                                                                                                                                                                                                                                                                                                                                             |                                                                                                                                                                                                                                                                                                                                   | -                               | -                           | P_trifoliata_00686_mRNA_14,1   |
| GF0050209 | 0                            | 0                        | 0                           | 1 Hypothetical protein (1)                                              |                                                                                                                                                                                                                                                                                                                                                                                                                                                                                                                                                                                                                                                                             |                                                                                                                                                                                                                                                                                                                                   | -                               | -                           | P_trifoliata_00686_mRNA_12,1   |
| GF0050208 | 0                            | 0                        | 0                           | 1 Hypothetical protein (1)                                              |                                                                                                                                                                                                                                                                                                                                                                                                                                                                                                                                                                                                                                                                             | Pentapeptide repeat [IPR01646] (1)                                                                                                                                                                                                                                                                                                | -                               | -                           | P_trifoliata_00686_mRNA_1,1    |
| GF0050207 | 0                            | 0                        | 0                           | 1 Hypothetical protein (1)                                              | ADP binding [GO:0043531]<br>molecular_function (1)                                                                                                                                                                                                                                                                                                                                                                                                                                                                                                                                                                                                                          | NB-ARC [IPR02182] (1)                                                                                                                                                                                                                                                                                                             | -                               | -                           | P_trifoliata_00685_mRNA_9,1    |
| GF0050206 | 0                            | 0                        | 0                           | 1 Disease resistance protein (1)                                        | ADP binding [GO:0043531]<br>molecular_function (1)                                                                                                                                                                                                                                                                                                                                                                                                                                                                                                                                                                                                                          | P-loop containing nucleoside triphosphate hydrolase [IPR027417] (1);<br>NB-ARC [IPR02182] (1)                                                                                                                                                                                                                                     | -                               | -                           | P_trifoliata_00685_mRNA_8,1    |
| GF0050205 | 0                            | 0                        | 0                           | 1 Hypothetical protein (1)                                              | vesicle docking involved in exocytosis [GO:000694 biological_process] (1);<br>exocyst [GO:0000145 cellular_component] (1)                                                                                                                                                                                                                                                                                                                                                                                                                                                                                                                                                   | Exocyst complex subunit Sec15-like [IPR07225] (1)                                                                                                                                                                                                                                                                                 | -                               | -                           | P_trifoliata_00685_mRNA_5,1    |
| GF0050204 | 0                            | 0                        | 0                           | 1 RNA-directed DNA polymerase, related (1)                              | nucleic acid binding [GO:0003676]<br>molecular_function (1)                                                                                                                                                                                                                                                                                                                                                                                                                                                                                                                                                                                                                 | Ribonuclease H-like domain [IPR012337] (1)                                                                                                                                                                                                                                                                                        | -                               | -                           | P_trifoliata_00685_mRNA_4,1    |
| GF0050203 | 0                            | 0                        | 0                           | 1 LRR and NB-ARC domains-containing disease resistance-like protein (1) | ADP binding [GO:0043531]<br>molecular_function (1)                                                                                                                                                                                                                                                                                                                                                                                                                                                                                                                                                                                                                          | NB-ARC [IPR02182] (1); P-loop containing nucleoside triphosphate hydrolase [IPR027417] (1)                                                                                                                                                                                                                                        | -                               | -                           | P_trifoliata_00685_mRNA_11,1   |
| GF0050202 | 0                            | 0                        | 0                           | 1 Hypothetical protein (1)                                              |                                                                                                                                                                                                                                                                                                                                                                                                                                                                                                                                                                                                                                                                             |                                                                                                                                                                                                                                                                                                                                   | -                               | -                           | P_trifoliata_00684_mRNA_6,1    |
| GF0050201 | 0                            | 0                        | 0                           | 1 Hypothetical protein (1)                                              |                                                                                                                                                                                                                                                                                                                                                                                                                                                                                                                                                                                                                                                                             |                                                                                                                                                                                                                                                                                                                                   | -                               | -                           | P_trifoliata_00684_mRNA_5,1    |
| GF0050200 | 0                            | 0                        | 0                           | 1 Hypothetical protein (1)                                              |                                                                                                                                                                                                                                                                                                                                                                                                                                                                                                                                                                                                                                                                             | Reverse transcriptase, RNA-dependent DNA polymerase [IPR013103] (1)                                                                                                                                                                                                                                                               | -                               | -                           | P_trifoliata_00684_mRNA_3,1    |
| GF0050199 | 0                            | 0                        | 0                           | 1 Hypothetical protein (1)                                              |                                                                                                                                                                                                                                                                                                                                                                                                                                                                                                                                                                                                                                                                             |                                                                                                                                                                                                                                                                                                                                   | -                               | -                           | P_trifoliata_00684_mRNA_13,1   |
| GF0050198 | 0                            | 0                        | 0                           | 1 Cytokinin riboside 5'-monophosphate phosphoribosyltransferase (1)     |                                                                                                                                                                                                                                                                                                                                                                                                                                                                                                                                                                                                                                                                             | LOG family [IPR031100] (1)                                                                                                                                                                                                                                                                                                        | -                               | -                           | P_trifoliata_00684_mRNA_12,1   |
| GF0050197 | 0                            | 0                        | 0                           | 1 Hypothetical protein (1)                                              |                                                                                                                                                                                                                                                                                                                                                                                                                                                                                                                                                                                                                                                                             |                                                                                                                                                                                                                                                                                                                                   | -                               | -                           | P_trifoliata_00684_mRNA_11,1   |
| GF0050196 | 0                            | 0                        | 0                           | 1 Transposable element protein, putative, (1)                           |                                                                                                                                                                                                                                                                                                                                                                                                                                                                                                                                                                                                                                                                             | Retrosposon gag domain [IPR005162] (1)                                                                                                                                                                                                                                                                                            | -                               | -                           | P_trifoliata_00684_mRNA_10,1   |
| GF0050195 | 0                            | 0                        | 0                           | 1 Hypothetical protein (1)                                              |                                                                                                                                                                                                                                                                                                                                                                                                                                                                                                                                                                                                                                                                             |                                                                                                                                                                                                                                                                                                                                   | -                               | -                           | P_trifoliata_00684_mRNA_1,1    |
| GF0050194 | 0                            | 0                        | 0                           | 1 Hypothetical protein (1)                                              |                                                                                                                                                                                                                                                                                                                                                                                                                                                                                                                                                                                                                                                                             |                                                                                                                                                                                                                                                                                                                                   | -                               | -                           | P_trifoliata_00683_mRNA_9,1    |
| GF0050193 | 0                            | 0                        | 0                           | 1 Hypothetical protein (1)                                              | regulation of transcription, DNA-templated [GO:0006355 biological_process] (1); DNA binding [GO:0005677 molecular_function] (1)                                                                                                                                                                                                                                                                                                                                                                                                                                                                                                                                             | NAC domain [IPR003441] (1)                                                                                                                                                                                                                                                                                                        | -                               | -                           | P_trifoliata_00683_mRNA_7,1    |
| GF0050192 | 0                            | 0                        | 0                           | 1 Hypothetical protein (1)                                              |                                                                                                                                                                                                                                                                                                                                                                                                                                                                                                                                                                                                                                                                             |                                                                                                                                                                                                                                                                                                                                   | -                               | -                           | P_trifoliata_00683_mRNA_3,1    |
| GF0050191 | 0                            | 0                        | 0                           | 1 Hypothetical protein (1)                                              |                                                                                                                                                                                                                                                                                                                                                                                                                                                                                                                                                                                                                                                                             |                                                                                                                                                                                                                                                                                                                                   | -                               | -                           | P_trifoliata_00683_mRNA_2,1    |
| GF0050190 | 0                            | 0                        | 0                           | 1 Hypothetical protein (1)                                              |                                                                                                                                                                                                                                                                                                                                                                                                                                                                                                                                                                                                                                                                             |                                                                                                                                                                                                                                                                                                                                   | -                               | -                           | P_trifoliata_00683_mRNA_10,1   |
| GF0050189 | 0                            | 0                        | 0                           | 1 Hypothetical protein (1)                                              |                                                                                                                                                                                                                                                                                                                                                                                                                                                                                                                                                                                                                                                                             |                                                                                                                                                                                                                                                                                                                                   | -                               | -                           | P_trifoliata_00683_mRNA_1,1    |
| GF0050188 | 0                            | 0                        | 0                           | 1 Hypothetical protein (1)                                              |                                                                                                                                                                                                                                                                                                                                                                                                                                                                                                                                                                                                                                                                             |                                                                                                                                                                                                                                                                                                                                   | -                               | -                           | P_trifoliata_00682_mRNA_5,1    |
| GF0050187 | 0                            | 0                        | 0                           | 1 Hypothetical protein (1)                                              |                                                                                                                                                                                                                                                                                                                                                                                                                                                                                                                                                                                                                                                                             | DNA-binding pseudobarrel domain [IPR015300] (1)                                                                                                                                                                                                                                                                                   | -                               | -                           | P_trifoliata_00682_mRNA_12,1   |
| GF0050186 | 0                            | 0                        | 0                           | 1 Hypothetical protein (1)                                              |                                                                                                                                                                                                                                                                                                                                                                                                                                                                                                                                                                                                                                                                             |                                                                                                                                                                                                                                                                                                                                   | -                               | -                           | P_trifoliata_00682_mRNA_11,1   |
| GF0050185 | 0                            | 0                        | 0                           | 1 Hypothetical protein (1)                                              | DNA binding [GO:0003677]<br>molecular_function (1)                                                                                                                                                                                                                                                                                                                                                                                                                                                                                                                                                                                                                          | B3 DNA binding domain [IPR003340] (1); DNA-binding pseudobarrel domain [IPR015300] (1)                                                                                                                                                                                                                                            | -                               | -                           | P_trifoliata_00682_mRNA_10,1   |
| GF0050184 | 0                            | 0                        | 0                           | 1 Hypothetical protein (1)                                              |                                                                                                                                                                                                                                                                                                                                                                                                                                                                                                                                                                                                                                                                             |                                                                                                                                                                                                                                                                                                                                   | -                               | -                           | P_trifoliata_00682_mRNA_1,1    |
| GF0050183 | 0                            | 0                        | 0                           | 1 Hypothetical protein (1)                                              |                                                                                                                                                                                                                                                                                                                                                                                                                                                                                                                                                                                                                                                                             |                                                                                                                                                                                                                                                                                                                                   | -                               | -                           | P_trifoliata_00681_mRNA_9,1    |
| GF0050182 | 0                            | 0                        | 0                           | 1 Hypothetical protein (1)                                              | oligosaccharyltransferase complex [GO:0008250 cellular_component] (1);<br>integral component of membrane [GO:0006412 biological_process] (1);<br>dolichyl-diphosphooligosaccharide-protein glycosyltransferase activity [GO:0004579 molecular_function] (1)<br>cysteine-type peptidase activity [GO:0008234 molecular_function] (1);<br>proteolysis [GO:0006508 biological_process] (1)                                                                                                                                                                                                                                                                                     | DAD-Oa2 [IPR003038] (1)                                                                                                                                                                                                                                                                                                           | -                               | -                           | P_trifoliata_00681_mRNA_6,1    |
| GF0050181 | 0                            | 0                        | 0                           | 1 Hypothetical protein (1)                                              |                                                                                                                                                                                                                                                                                                                                                                                                                                                                                                                                                                                                                                                                             | Upl1 protease family, C-terminal catalytic domain [IPR003653] (1)                                                                                                                                                                                                                                                                 | -                               | -                           | P_trifoliata_00681_mRNA_5,1    |
| GF0050180 | 0                            | 0                        | 0                           | 1 Hypothetical protein (1)                                              |                                                                                                                                                                                                                                                                                                                                                                                                                                                                                                                                                                                                                                                                             |                                                                                                                                                                                                                                                                                                                                   | -                               | -                           | P_trifoliata_00681_mRNA_4,1    |
| GF0050179 | 0                            | 0                        | 0                           | 1 Hypothetical protein (1)                                              |                                                                                                                                                                                                                                                                                                                                                                                                                                                                                                                                                                                                                                                                             |                                                                                                                                                                                                                                                                                                                                   | -                               | -                           | P_trifoliata_00681_mRNA_3,1    |
| GF0050178 | 0                            | 0                        | 0                           | 1 Hypothetical protein (1)                                              |                                                                                                                                                                                                                                                                                                                                                                                                                                                                                                                                                                                                                                                                             |                                                                                                                                                                                                                                                                                                                                   | -                               | -                           | P_trifoliata_00681_mRNA_11,1   |
| GF0050177 | 0                            | 0                        | 0                           | 1 Hypothetical protein (1)                                              |                                                                                                                                                                                                                                                                                                                                                                                                                                                                                                                                                                                                                                                                             |                                                                                                                                                                                                                                                                                                                                   | -                               | -                           | P_trifoliata_00681_mRNA_10,1   |
| GF0050176 | 0                            | 0                        | 0                           | 1 Hypothetical protein (1)                                              | intracellular [GO:0005622 cellular_component] (1); translation [GO:0006412 biological_process] (1);<br>structural constituent of ribosome [GO:0007375 molecular_function] (1);<br>ribosome [GO:0005840 cellular_component] (1)                                                                                                                                                                                                                                                                                                                                                                                                                                              | Translation protein SH3-like domain [IPR008991] (1); Ribosomal protein L2, domain 3 [IPR014726] (1); Ribosomal protein L2 [IPR002171] (1)                                                                                                                                                                                         | -                               | -                           | P_trifoliata_00680_mRNA_8,1    |
| GF0050175 | 0                            | 0                        | 0                           | 1 Hypothetical protein (1)                                              | polysaccharide binding [GO:0030247]<br>molecular_function (1)                                                                                                                                                                                                                                                                                                                                                                                                                                                                                                                                                                                                               | Wall-associated receptor kinase, galacturonate-binding domain [IPR025287] (1)                                                                                                                                                                                                                                                     | -                               | -                           | P_trifoliata_00680_mRNA_3,1    |
| GF0050174 | 0                            | 0                        | 0                           | 1 Hypothetical protein (1)                                              |                                                                                                                                                                                                                                                                                                                                                                                                                                                                                                                                                                                                                                                                             |                                                                                                                                                                                                                                                                                                                                   | -                               | -                           | P_trifoliata_00680_mRNA_12,1   |
| GF0050173 | 0                            | 0                        | 0                           | 1 Hypothetical protein (1)                                              |                                                                                                                                                                                                                                                                                                                                                                                                                                                                                                                                                                                                                                                                             |                                                                                                                                                                                                                                                                                                                                   | -                               | -                           | P_trifoliata_00680_mRNA_11,1   |
| GF0050172 | 0                            | 0                        | 0                           | 1 Calcium-transporting ATPase 8, plasma membrane-type (1)               | integral component of membrane [GO:0006021 cellular_component] (1);<br>calcium ion transmembrane transport [GO:0070588 biological_process] (1);<br>membrane [GO:0016020 cellular_component] (1); metal ion binding [GO:0046872 molecular_function] (1); calcium-transporting ATPase activity [GO:0005388 molecular_function] (1);<br>nucleotide binding [GO:0000166 molecular_function] (1); ATP binding [GO:0005524 molecular_function] (1)<br>ribosome [GO:0005840 cellular_component] (1); structural constituent of ribosome [GO:0007375 molecular_function] (1); translation [GO:0006412 biological_process] (1);<br>intracellular [GO:0005622 cellular_component] (1) | P-type ATPase, cytoplasmic domain N [IPR023299] (1); Cation-transporting P-type ATPase, C-terminal [IPR006068] (1); P-type ATPase, subfamily IIB [IPR006405] (1); P-type ATPase, transmembrane domain [IPR023298] (1);<br>P-type ATPase [IPR001757] (1); HAD-like domain [IPR023241] (1); P-type ATPase, A domain [IPR008250] (1) | -                               | -                           | P_trifoliata_00680_mRNA_10,1   |
| GF0050171 | 0                            | 0                        | 0                           | 1 Hypothetical protein (1)                                              |                                                                                                                                                                                                                                                                                                                                                                                                                                                                                                                                                                                                                                                                             | Translation protein SH3-like domain [IPR008991] (1); Ribosomal protein L2, domain 3 [IPR014726] (1); Ribosomal protein L2 [IPR002171] (1); Ribosomal protein L2, C-terminal [IPR023669] (1)                                                                                                                                       | -                               | -                           | P_trifoliata_00680_mRNA_1,1    |
| GF0050170 | 0                            | 0                        | 0                           | 1 Hypothetical protein (1)                                              |                                                                                                                                                                                                                                                                                                                                                                                                                                                                                                                                                                                                                                                                             |                                                                                                                                                                                                                                                                                                                                   | -                               | -                           | P_trifoliata_00679_mRNA_7,1    |
| GF0050169 | 0                            | 0                        | 0                           | 1 Hypothetical protein (1)                                              |                                                                                                                                                                                                                                                                                                                                                                                                                                                                                                                                                                                                                                                                             |                                                                                                                                                                                                                                                                                                                                   | -                               | -                           | P_trifoliata_00679_mRNA_3,1    |
| GF0050168 | 0                            | 0                        | 0                           | 1 Hypothetical protein (1)                                              | nucleic acid binding [GO:0003676]<br>molecular_function (1)                                                                                                                                                                                                                                                                                                                                                                                                                                                                                                                                                                                                                 | Ribonuclease H-like domain [IPR012337] (1)                                                                                                                                                                                                                                                                                        | -                               | -                           | P_trifoliata_00679_mRNA_2,1    |
| GF0050167 | 0                            | 0                        | 0                           | 1 Hypothetical protein (1)                                              |                                                                                                                                                                                                                                                                                                                                                                                                                                                                                                                                                                                                                                                                             |                                                                                                                                                                                                                                                                                                                                   | -                               | -                           | P_trifoliata_00679_mRNA_18,1   |
| GF0050166 | 0                            | 0                        | 0                           | 1 Hypothetical protein (1)                                              |                                                                                                                                                                                                                                                                                                                                                                                                                                                                                                                                                                                                                                                                             |                                                                                                                                                                                                                                                                                                                                   | -                               | -                           | P_trifoliata_00679_mRNA_17,1   |
| GF0050165 | 0                            | 0                        | 0                           | 1 Hypothetical protein (1)                                              |                                                                                                                                                                                                                                                                                                                                                                                                                                                                                                                                                                                                                                                                             |                                                                                                                                                                                                                                                                                                                                   | -                               | -                           | P_trifoliata_00679_mRNA_13,1   |
| GF0050164 | 0                            | 0                        | 0                           | 1 Hypothetical protein (1)                                              | ATP binding [GO:0005524 molecular_function] (1); protein phosphorylation [GO:0006468 biological_process] (1); protein kinase activity [GO:0004672 molecular_function] (1)                                                                                                                                                                                                                                                                                                                                                                                                                                                                                                   | Tyrosine-protein kinase, active site [IPR008266] (1); Protein kinase domain [IPR000719] (1); Protein kinase-like domain [IPR011099] (1)                                                                                                                                                                                           | -                               | -                           | P_trifoliata_00679_mRNA_12,1   |
| GF0050163 | 0                            | 0                        | 0                           | 1 Hypothetical protein (1)                                              |                                                                                                                                                                                                                                                                                                                                                                                                                                                                                                                                                                                                                                                                             |                                                                                                                                                                                                                                                                                                                                   | -                               | -                           | P_trifoliata_00679_mRNA_11,1   |
| GF0050162 | 0                            | 0                        | 0                           | 1 Hypothetical protein (1)                                              |                                                                                                                                                                                                                                                                                                                                                                                                                                                                                                                                                                                                                                                                             |                                                                                                                                                                                                                                                                                                                                   | -                               | -                           | P_trifoliata_00679_mRNA_10,1   |
| GF0050161 | 0                            | 0                        | 0                           | 1 Hypothetical protein (1)                                              |                                                                                                                                                                                                                                                                                                                                                                                                                                                                                                                                                                                                                                                                             | Retrosposon gag domain [IPR005162] (1)                                                                                                                                                                                                                                                                                            | -                               | -                           | P_trifoliata_00678_mRNA_8,1    |
| GF0050160 | 0                            | 0                        | 0                           | 1 Hypothetical protein (1)                                              |                                                                                                                                                                                                                                                                                                                                                                                                                                                                                                                                                                                                                                                                             |                                                                                                                                                                                                                                                                                                                                   | -                               | -                           | P_trifoliata_00678_mRNA_6,1    |
| GF0050159 | 0                            | 0                        | 0                           | 1 Hypothetical protein (1)                                              |                                                                                                                                                                                                                                                                                                                                                                                                                                                                                                                                                                                                                                                                             |                                                                                                                                                                                                                                                                                                                                   | -                               | -                           | P_trifoliata_00678_mRNA_5,1    |
| GF0050158 | 0                            | 0                        | 0                           | 1 Hypothetical protein (1)                                              |                                                                                                                                                                                                                                                                                                                                                                                                                                                                                                                                                                                                                                                                             |                                                                                                                                                                                                                                                                                                                                   | -                               | -                           | P_trifoliata_00678_mRNA_3,1    |
| GF0050157 | 0                            | 0                        | 0                           | 1 Retrosposon protein, putative, Ty1-copia subclass (1)                 | nucleic acid binding [GO:0003676]<br>molecular_function (1); zinc ion binding [GO:0008270 molecular_function] (1)                                                                                                                                                                                                                                                                                                                                                                                                                                                                                                                                                           | Zinc finger, CCHC-type [IPR01878] (1)                                                                                                                                                                                                                                                                                             | -                               | -                           | P_trifoliata_00678_mRNA_21,1   |
| GF0050156 | 0                            | 0                        | 0                           | 1 Hypothetical protein (1)                                              |                                                                                                                                                                                                                                                                                                                                                                                                                                                                                                                                                                                                                                                                             |                                                                                                                                                                                                                                                                                                                                   | -                               | -                           | P_trifoliata_00678_mRNA_19,1   |
| GF0050155 | 0                            | 0                        | 0                           | 1 Hypothetical protein (1)                                              |                                                                                                                                                                                                                                                                                                                                                                                                                                                                                                                                                                                                                                                                             |                                                                                                                                                                                                                                                                                                                                   | -                               | -                           | P_trifoliata_00678_mRNA_15,1   |
| GF0050154 | 0                            | 0                        | 0                           | 1 Hypothetical protein (1)                                              |                                                                                                                                                                                                                                                                                                                                                                                                                                                                                                                                                                                                                                                                             |                                                                                                                                                                                                                                                                                                                                   | -                               | -                           | P_trifoliata_00678_mRNA_13,1   |
| GF0050153 | 0                            | 0                        | 0                           | 1 Hypothetical protein (1)                                              |                                                                                                                                                                                                                                                                                                                                                                                                                                                                                                                                                                                                                                                                             |                                                                                                                                                                                                                                                                                                                                   | -                               | -                           | P_trifoliata_00678_mRNA_10,1   |
| GF0050152 | 0                            | 0                        | 0                           | 1 Hypothetical protein (1)                                              |                                                                                                                                                                                                                                                                                                                                                                                                                                                                                                                                                                                                                                                                             |                                                                                                                                                                                                                                                                                                                                   | -                               | -                           | P_trifoliata_00677_mRNA_9,1    |
| GF0050151 | 0                            | 0                        | 0                           | 1 Hypothetical protein (1)                                              |                                                                                                                                                                                                                                                                                                                                                                                                                                                                                                                                                                                                                                                                             |                                                                                                                                                                                                                                                                                                                                   | -                               | -                           | P_trifoliata_00677_mRNA_7,1    |
| GF0050150 | 0                            | 0                        | 0                           | 1 Hypothetical protein (1)                                              |                                                                                                                                                                                                                                                                                                                                                                                                                                                                                                                                                                                                                                                                             |                                                                                                                                                                                                                                                                                                                                   | -                               | -                           | P_trifoliata_00677_mRNA_3,1    |

| ID        | Num. in <i>C. clementiae</i> | Num. in <i>C. canthii</i> | Num. in <i>P. trifoliata</i> | Note                                                              | GO                                                                                                                                                                                                     | InterPro                                                                                                                                                                                                                   | Members in <i>C. clementiae</i> | Members in <i>C. canthii</i> | Members in <i>P. trifoliata</i> |
|-----------|------------------------------|---------------------------|------------------------------|-------------------------------------------------------------------|--------------------------------------------------------------------------------------------------------------------------------------------------------------------------------------------------------|----------------------------------------------------------------------------------------------------------------------------------------------------------------------------------------------------------------------------|---------------------------------|------------------------------|---------------------------------|
| GF0050149 | 0                            | 0                         | 1                            | Truncated RB (1)                                                  | ADP binding [GO:0043531] (1);<br>molecular_function (1)                                                                                                                                                | NB-ARC [IPRO02182] (1); P-loop containing nucleoside triphosphate hydrolase [IPRO27417] (1)                                                                                                                                | -                               | -                            | P_trifoliata_00677_mRNA_11.1    |
| GF0050148 | 0                            | 0                         | 1                            | Hypothetical protein (1)                                          |                                                                                                                                                                                                        |                                                                                                                                                                                                                            |                                 |                              | P_trifoliata_00677_mRNA_1.1     |
| GF0050147 | 0                            | 0                         | 1                            | Hypothetical protein (1)                                          |                                                                                                                                                                                                        |                                                                                                                                                                                                                            |                                 |                              | P_trifoliata_00676_mRNA_4.1     |
| GF0050146 | 0                            | 0                         | 1                            | Hypothetical protein (1)                                          |                                                                                                                                                                                                        |                                                                                                                                                                                                                            |                                 |                              | P_trifoliata_00676_mRNA_18.1    |
| GF0050145 | 0                            | 0                         | 1                            | Hypothetical protein (1)                                          |                                                                                                                                                                                                        |                                                                                                                                                                                                                            |                                 |                              | P_trifoliata_00675_mRNA_9.1     |
| GF0050144 | 0                            | 0                         | 1                            | Hypothetical protein (1)                                          |                                                                                                                                                                                                        |                                                                                                                                                                                                                            |                                 |                              | P_trifoliata_00675_mRNA_8.1     |
| GF0050143 | 0                            | 0                         | 1                            | Hypothetical protein (1)                                          | protein binding [GO:0005515] (1);<br>molecular_function (1)                                                                                                                                            | F-box associated domain, type 1 [IPRO08272] (1); F-box domain [IPRO01810] (1); F-box associated interaction domain [IPRO17451] (1)                                                                                         |                                 |                              | P_trifoliata_00675_mRNA_5.1     |
| GF0050142 | 0                            | 0                         | 1                            | Hypothetical protein (1)                                          | translational initiation [GO:006413] (1); translation biological_process (1); translation initiation factor activity [GO:0003743] (1);<br>molecular_function (1)                                       | Translation initiation factor IF2/IF5, N-terminal [IPRO16189] (1)                                                                                                                                                          |                                 |                              | P_trifoliata_00675_mRNA_13.1    |
| GF0050141 | 0                            | 0                         | 1                            | Hypothetical protein (1)                                          | serine-type peptidase activity [GO:0008236] (1);<br>molecular_function (1);<br>proteolysis [GO:0006508] (1);<br>biological_process (1)                                                                 | Peptidase S28 [IPRO08758] (1)                                                                                                                                                                                              |                                 |                              | P_trifoliata_00675_mRNA_11.1    |
| GF0050140 | 0                            | 0                         | 1                            | Hypothetical protein (1)                                          | regulation of transcription, DNA-templated [GO:0006355] (1);<br>biological_process (1)                                                                                                                 | FHY3/FAR1 family [IPRO31052] (1);<br>FAR1 DNA binding domain [IPRO04330] (1)                                                                                                                                               |                                 |                              | P_trifoliata_00675_mRNA_10.1    |
| GF0050139 | 0                            | 0                         | 1                            | Hypothetical protein (1)                                          |                                                                                                                                                                                                        |                                                                                                                                                                                                                            |                                 |                              | P_trifoliata_00674_mRNA_8.1     |
| GF0050138 | 0                            | 0                         | 1                            | Hypothetical protein (1)                                          |                                                                                                                                                                                                        | Leucine-rich repeat domain, L domain-like [IPRO32675] (1)                                                                                                                                                                  |                                 |                              | P_trifoliata_00674_mRNA_6.1     |
| GF0050137 | 0                            | 0                         | 1                            | Hypothetical protein (1)                                          |                                                                                                                                                                                                        | Transposase, MuDR, plant [IPRO04332] (1)                                                                                                                                                                                   |                                 |                              | P_trifoliata_00674_mRNA_2.1     |
| GF0050136 | 0                            | 0                         | 1                            | Hypothetical protein (1)                                          |                                                                                                                                                                                                        |                                                                                                                                                                                                                            |                                 |                              | P_trifoliata_00673_mRNA_9.1     |
| GF0050135 | 0                            | 0                         | 1                            | NB-ARC domain-containing disease resistance protein (1)           | ADP binding [GO:0043531] (1);<br>molecular_function (1)                                                                                                                                                | NB-ARC [IPRO02182] (1); P-loop containing nucleoside triphosphate hydrolase [IPRO27417] (1)                                                                                                                                |                                 |                              | P_trifoliata_00673_mRNA_7.1     |
| GF0050134 | 0                            | 0                         | 1                            | Hypothetical protein (1)                                          |                                                                                                                                                                                                        |                                                                                                                                                                                                                            |                                 |                              | P_trifoliata_00673_mRNA_6.1     |
| GF0050133 | 0                            | 0                         | 1                            | Hypothetical protein (1)                                          |                                                                                                                                                                                                        |                                                                                                                                                                                                                            |                                 |                              | P_trifoliata_00673_mRNA_5.1     |
| GF0050132 | 0                            | 0                         | 1                            | Hypothetical protein (1)                                          |                                                                                                                                                                                                        |                                                                                                                                                                                                                            |                                 |                              | P_trifoliata_00673_mRNA_3.1     |
| GF0050131 | 0                            | 0                         | 1                            | Hypothetical protein (1)                                          |                                                                                                                                                                                                        |                                                                                                                                                                                                                            |                                 |                              | P_trifoliata_00673_mRNA_2.1     |
| GF0050130 | 0                            | 0                         | 1                            | Hypothetical protein (1)                                          |                                                                                                                                                                                                        |                                                                                                                                                                                                                            |                                 |                              | P_trifoliata_00673_mRNA_12.1    |
| GF0050129 | 0                            | 0                         | 1                            | Hypothetical protein (1)                                          |                                                                                                                                                                                                        | LOG family [IPRO31100] (1)                                                                                                                                                                                                 |                                 |                              | P_trifoliata_00672_mRNA_9.1     |
| GF0050128 | 0                            | 0                         | 1                            | Hypothetical protein (1)                                          |                                                                                                                                                                                                        |                                                                                                                                                                                                                            |                                 |                              | P_trifoliata_00672_mRNA_8.1     |
| GF0050127 | 0                            | 0                         | 1                            | Hypothetical protein (1)                                          | RNA binding [GO:0003723] (1);<br>molecular_function (1);<br>ribonuclease T2 activity [GO:0033997] (1);<br>molecular_function (1)                                                                       | Ribonuclease T2-like [IPRO01568] (1)                                                                                                                                                                                       |                                 |                              | P_trifoliata_00672_mRNA_5.1     |
| GF0050126 | 0                            | 0                         | 1                            | Hypothetical protein (1)                                          |                                                                                                                                                                                                        |                                                                                                                                                                                                                            |                                 |                              | P_trifoliata_00672_mRNA_2.1     |
| GF0050125 | 0                            | 0                         | 1                            | Hypothetical protein (1)                                          |                                                                                                                                                                                                        |                                                                                                                                                                                                                            |                                 |                              | P_trifoliata_00672_mRNA_13.1    |
| GF0050124 | 0                            | 0                         | 1                            | Hypothetical protein (1)                                          |                                                                                                                                                                                                        |                                                                                                                                                                                                                            |                                 |                              | P_trifoliata_00672_mRNA_11.1    |
| GF0050123 | 0                            | 0                         | 1                            | Hypothetical protein (1)                                          |                                                                                                                                                                                                        |                                                                                                                                                                                                                            |                                 |                              | P_trifoliata_00672_mRNA_1.1     |
| GF0050122 | 0                            | 0                         | 1                            | Hypothetical protein (1)                                          |                                                                                                                                                                                                        |                                                                                                                                                                                                                            |                                 |                              | P_trifoliata_00671_mRNA_6.1     |
| GF0050121 | 0                            | 0                         | 1                            | Hypothetical protein (1)                                          |                                                                                                                                                                                                        |                                                                                                                                                                                                                            |                                 |                              | P_trifoliata_00671_mRNA_5.1     |
| GF0050120 | 0                            | 0                         | 1                            | Hypothetical protein (1)                                          |                                                                                                                                                                                                        |                                                                                                                                                                                                                            |                                 |                              | P_trifoliata_00671_mRNA_4.1     |
| GF0050119 | 0                            | 0                         | 1                            | Hypothetical protein (1)                                          |                                                                                                                                                                                                        |                                                                                                                                                                                                                            |                                 |                              | P_trifoliata_00671_mRNA_3.1     |
| GF0050118 | 0                            | 0                         | 1                            | L-type lectin-domain containing receptor kinase IV.2 (1)          | carbohydrate binding [GO:0030246] (1);<br>molecular_function (1)                                                                                                                                       | Legume lectin domain [IPRO01220] (1);<br>Concanavalin A-like lectin/glucanase domain [IPRO13320] (1)                                                                                                                       |                                 |                              | P_trifoliata_00671_mRNA_11.1    |
| GF0050117 | 0                            | 0                         | 1                            | Hypothetical protein (1)                                          |                                                                                                                                                                                                        | Pentapeptide repeat [IPRO2885] (1);<br>Glycoside hydrolase, catalytic domain [IPRO13781] (1)                                                                                                                               |                                 |                              | P_trifoliata_00670_mRNA_11.1    |
| GF0050116 | 0                            | 0                         | 1                            | Hypothetical protein (1)                                          | carbohydrate metabolic process [GO:0005975] (1);<br>biological_process (1)                                                                                                                             |                                                                                                                                                                                                                            |                                 |                              | P_trifoliata_00669_mRNA_1.1     |
| GF0050115 | 0                            | 0                         | 1                            | 5-pentadecatrienyl resorcinol O-methyltransferase (1)             |                                                                                                                                                                                                        |                                                                                                                                                                                                                            |                                 |                              | P_trifoliata_00668_mRNA_8.1     |
| GF0050114 | 0                            | 0                         | 1                            | Hypothetical protein (1)                                          |                                                                                                                                                                                                        |                                                                                                                                                                                                                            |                                 |                              | P_trifoliata_00668_mRNA_7.1     |
| GF0050113 | 0                            | 0                         | 1                            | Hypothetical protein (1)                                          |                                                                                                                                                                                                        |                                                                                                                                                                                                                            |                                 |                              | P_trifoliata_00668_mRNA_6.1     |
| GF0050112 | 0                            | 0                         | 1                            | Hypothetical protein (1)                                          |                                                                                                                                                                                                        |                                                                                                                                                                                                                            |                                 |                              | P_trifoliata_00668_mRNA_4.1     |
| GF0050111 | 0                            | 0                         | 1                            | Hypothetical protein (1)                                          |                                                                                                                                                                                                        |                                                                                                                                                                                                                            |                                 |                              | P_trifoliata_00668_mRNA_3.1     |
| GF0050110 | 0                            | 0                         | 1                            | Hypothetical protein (1)                                          |                                                                                                                                                                                                        |                                                                                                                                                                                                                            |                                 |                              | P_trifoliata_00668_mRNA_2.1     |
| GF0050109 | 0                            | 0                         | 1                            | Hypothetical protein (1)                                          |                                                                                                                                                                                                        |                                                                                                                                                                                                                            |                                 |                              | P_trifoliata_00668_mRNA_1.1     |
| GF0050108 | 0                            | 0                         | 1                            | Hypothetical protein (1)                                          |                                                                                                                                                                                                        |                                                                                                                                                                                                                            |                                 |                              | P_trifoliata_00667_mRNA_8.1     |
| GF0050107 | 0                            | 0                         | 1                            | Hypothetical protein (1)                                          |                                                                                                                                                                                                        |                                                                                                                                                                                                                            |                                 |                              | P_trifoliata_00667_mRNA_7.1     |
| GF0050106 | 0                            | 0                         | 1                            | Hypothetical protein (1)                                          |                                                                                                                                                                                                        | Retrosposon gag domain [IPRO05162] (1)                                                                                                                                                                                     |                                 |                              | P_trifoliata_00667_mRNA_6.1     |
| GF0050105 | 0                            | 0                         | 1                            | Hypothetical protein (1)                                          |                                                                                                                                                                                                        |                                                                                                                                                                                                                            |                                 |                              | P_trifoliata_00667_mRNA_2.1     |
| GF0050104 | 0                            | 0                         | 1                            | Hypothetical protein (1)                                          |                                                                                                                                                                                                        |                                                                                                                                                                                                                            |                                 |                              | P_trifoliata_00667_mRNA_15.1    |
| GF0050103 | 0                            | 0                         | 1                            | Hypothetical protein (1)                                          | nucleic acid binding [GO:0003676] (1);<br>molecular_function (1)                                                                                                                                       | Ribonuclease H-like domain [IPRO12337] (1)                                                                                                                                                                                 |                                 |                              | P_trifoliata_00667_mRNA_13.1    |
| GF0050102 | 0                            | 0                         | 1                            | Cytokinin riboside 5'-monophosphate phosphoribosyltransferase (1) |                                                                                                                                                                                                        | LOG family [IPRO31100] (1)                                                                                                                                                                                                 |                                 |                              | P_trifoliata_00667_mRNA_11.1    |
| GF0050101 | 0                            | 0                         | 1                            | Hypothetical protein (1)                                          |                                                                                                                                                                                                        |                                                                                                                                                                                                                            |                                 |                              | P_trifoliata_00667_mRNA_1.1     |
| GF0050100 | 0                            | 0                         | 1                            | Hypothetical protein (1)                                          | aspartic-type endopeptidase activity [GO:0004190] (1);<br>molecular_function (1);<br>proteolysis [GO:0006508] (1);<br>biological_process (1)                                                           | Retropesins [IPRO18061] (1);<br>Peptidase A2A, retrovirus, catalytic [IPRO01995] (1);<br>Aspartic peptidase domain [IPRO21109] (1)                                                                                         |                                 |                              | P_trifoliata_00666_mRNA_9.1     |
| GF0050099 | 0                            | 0                         | 1                            | Hypothetical protein (1)                                          |                                                                                                                                                                                                        | Viral movement protein [IPRO28919] (1)                                                                                                                                                                                     |                                 |                              | P_trifoliata_00666_mRNA_8.1     |
| GF0050098 | 0                            | 0                         | 1                            | Hypothetical protein (1)                                          |                                                                                                                                                                                                        |                                                                                                                                                                                                                            |                                 |                              | P_trifoliata_00666_mRNA_7.1     |
| GF0050097 | 0                            | 0                         | 1                            | Hypothetical protein (1)                                          | nucleic acid binding [GO:0003676] (1);<br>molecular_function (1);<br>zinc ion binding [GO:0008270] (1);<br>molecular_function (1)                                                                      | Zinc finger, CCHC-type [IPRO01878] (1)                                                                                                                                                                                     |                                 |                              | P_trifoliata_00666_mRNA_4.1     |
| GF0050096 | 0                            | 0                         | 1                            | Hypothetical protein (1)                                          |                                                                                                                                                                                                        |                                                                                                                                                                                                                            |                                 |                              | P_trifoliata_00666_mRNA_3.1     |
| GF0050095 | 0                            | 0                         | 1                            | Hypothetical protein (1)                                          |                                                                                                                                                                                                        |                                                                                                                                                                                                                            |                                 |                              | P_trifoliata_00666_mRNA_13.1    |
| GF0050094 | 0                            | 0                         | 1                            | Hypothetical protein (1)                                          |                                                                                                                                                                                                        |                                                                                                                                                                                                                            |                                 |                              | P_trifoliata_00666_mRNA_12.1    |
| GF0050093 | 0                            | 0                         | 1                            | Hypothetical protein (1)                                          |                                                                                                                                                                                                        |                                                                                                                                                                                                                            |                                 |                              | P_trifoliata_00666_mRNA_11.1    |
| GF0050092 | 0                            | 0                         | 1                            | Hypothetical protein (1)                                          |                                                                                                                                                                                                        |                                                                                                                                                                                                                            |                                 |                              | P_trifoliata_00666_mRNA_10.1    |
| GF0050091 | 0                            | 0                         | 1                            | Hypothetical protein (1)                                          |                                                                                                                                                                                                        |                                                                                                                                                                                                                            |                                 |                              | P_trifoliata_00665_mRNA_5.1     |
| GF0050090 | 0                            | 0                         | 1                            | Disease resistance protein (NBS-LRR class) family protein (1)     | protein binding [GO:0005515] (1);<br>molecular_function (1)                                                                                                                                            | Leucine-rich repeat [IPRO01611] (1);<br>Leucine-rich repeat domain, L domain-like [IPRO32675] (1)                                                                                                                          |                                 |                              | P_trifoliata_00665_mRNA_3.1     |
| GF0050089 | 0                            | 0                         | 1                            | Hypothetical protein (1)                                          |                                                                                                                                                                                                        |                                                                                                                                                                                                                            |                                 |                              | P_trifoliata_00665_mRNA_2.1     |
| GF0050088 | 0                            | 0                         | 1                            | Hypothetical protein (1)                                          |                                                                                                                                                                                                        |                                                                                                                                                                                                                            |                                 |                              | P_trifoliata_00665_mRNA_1.1     |
| GF0050087 | 0                            | 0                         | 1                            | Hypothetical protein (1)                                          |                                                                                                                                                                                                        |                                                                                                                                                                                                                            |                                 |                              | P_trifoliata_00664_mRNA_9.1     |
| GF0050086 | 0                            | 0                         | 1                            | Hypothetical protein (1)                                          |                                                                                                                                                                                                        |                                                                                                                                                                                                                            |                                 |                              | P_trifoliata_00664_mRNA_7.1     |
| GF0050085 | 0                            | 0                         | 1                            | Hypothetical protein (1)                                          |                                                                                                                                                                                                        |                                                                                                                                                                                                                            |                                 |                              | P_trifoliata_00664_mRNA_2.1     |
| GF0050084 | 0                            | 0                         | 1                            | Hypothetical protein (1)                                          |                                                                                                                                                                                                        |                                                                                                                                                                                                                            |                                 |                              | P_trifoliata_00664_mRNA_11.1    |
| GF0050083 | 0                            | 0                         | 1                            | Hypothetical protein (1)                                          |                                                                                                                                                                                                        |                                                                                                                                                                                                                            |                                 |                              | P_trifoliata_00663_mRNA_7.1     |
| GF0050082 | 0                            | 0                         | 1                            | Retrosposon protein, putative, Ty1-copia subclass (1)             |                                                                                                                                                                                                        | Gag-polyprotein of LTR copia-type [IPRO29472] (1)                                                                                                                                                                          |                                 |                              | P_trifoliata_00663_mRNA_3.1     |
| GF0050081 | 0                            | 0                         | 1                            | Hypothetical protein (1)                                          |                                                                                                                                                                                                        |                                                                                                                                                                                                                            |                                 |                              | P_trifoliata_00663_mRNA_14.1    |
| GF0050080 | 0                            | 0                         | 1                            | Hypothetical protein (1)                                          |                                                                                                                                                                                                        |                                                                                                                                                                                                                            |                                 |                              | P_trifoliata_00663_mRNA_12.1    |
| GF0050079 | 0                            | 0                         | 1                            | Hypothetical protein (1)                                          |                                                                                                                                                                                                        |                                                                                                                                                                                                                            |                                 |                              | P_trifoliata_00663_mRNA_10.1    |
| GF0050078 | 0                            | 0                         | 1                            | Hypothetical protein (1)                                          |                                                                                                                                                                                                        |                                                                                                                                                                                                                            |                                 |                              | P_trifoliata_00663_mRNA_1.1     |
| GF0050077 | 0                            | 0                         | 1                            | Hypothetical protein (1)                                          |                                                                                                                                                                                                        |                                                                                                                                                                                                                            |                                 |                              | P_trifoliata_00662_mRNA_6.1     |
| GF0050076 | 0                            | 0                         | 1                            | Hypothetical protein (1)                                          |                                                                                                                                                                                                        |                                                                                                                                                                                                                            |                                 |                              | P_trifoliata_00662_mRNA_3.1     |
| GF0050075 | 0                            | 0                         | 1                            | Hypothetical protein (1)                                          |                                                                                                                                                                                                        | Domain of unknown function DJF4283 [IPRO25558] (1)                                                                                                                                                                         |                                 |                              | P_trifoliata_00662_mRNA_2.1     |
| GF0050074 | 0                            | 0                         | 1                            | Hypothetical protein (1)                                          |                                                                                                                                                                                                        |                                                                                                                                                                                                                            |                                 |                              | P_trifoliata_00661_mRNA_5.1     |
| GF0050073 | 0                            | 0                         | 1                            | Hypothetical protein (1)                                          |                                                                                                                                                                                                        |                                                                                                                                                                                                                            |                                 |                              | P_trifoliata_00661_mRNA_1.1     |
| GF0050072 | 0                            | 0                         | 1                            | Hypothetical protein (1)                                          |                                                                                                                                                                                                        |                                                                                                                                                                                                                            |                                 |                              | P_trifoliata_00660_mRNA_6.1     |
| GF0050071 | 0                            | 0                         | 1                            | Polyoma-like transferase, Ribonuclease H fold (1)                 | nucleic acid binding [GO:0003676] (1);<br>molecular_function (1);<br>DNA binding [GO:0003677] (1);<br>molecular_function (1);<br>nucleic acid binding [GO:0003676] (1)                                 | Ribonuclease H-like domain [IPRO12337] (1)                                                                                                                                                                                 |                                 |                              | P_trifoliata_00660_mRNA_12.1    |
| GF0050070 | 0                            | 0                         | 1                            | Hypothetical protein (1)                                          |                                                                                                                                                                                                        | hAT-like transposase, RNase-H fold [IPRO25525] (1);<br>Ribonuclease H-like domain [IPRO12337] (1)                                                                                                                          |                                 |                              | P_trifoliata_00660_mRNA_11.1    |
| GF0050069 | 0                            | 0                         | 1                            | Cytokinin riboside 5'-monophosphate phosphoribosyltransferase (1) |                                                                                                                                                                                                        | LOG family [IPRO31100] (1)                                                                                                                                                                                                 |                                 |                              | P_trifoliata_00660_mRNA_10.1    |
| GF0050068 | 0                            | 0                         | 1                            | Hypothetical protein (1)                                          |                                                                                                                                                                                                        |                                                                                                                                                                                                                            |                                 |                              | P_trifoliata_00660_mRNA_1.1     |
| GF0050067 | 0                            | 0                         | 1                            | Hypothetical protein (1)                                          |                                                                                                                                                                                                        |                                                                                                                                                                                                                            |                                 |                              | P_trifoliata_00659_mRNA_9.1     |
| GF0050066 | 0                            | 0                         | 1                            | Hypothetical protein (1)                                          |                                                                                                                                                                                                        |                                                                                                                                                                                                                            |                                 |                              | P_trifoliata_00659_mRNA_8.1     |
| GF0050065 | 0                            | 0                         | 1                            | Hypothetical protein (1)                                          | nucleic acid binding [GO:0003676] (1);<br>molecular_function (1)                                                                                                                                       | Ribonuclease H-like domain [IPRO12337] (1)                                                                                                                                                                                 |                                 |                              | P_trifoliata_00659_mRNA_4.1     |
| GF0050064 | 0                            | 0                         | 1                            | Hypothetical protein (1)                                          |                                                                                                                                                                                                        |                                                                                                                                                                                                                            |                                 |                              | P_trifoliata_00658_mRNA_11.1    |
| GF0050063 | 0                            | 0                         | 1                            | Hypothetical protein (1)                                          |                                                                                                                                                                                                        |                                                                                                                                                                                                                            |                                 |                              | P_trifoliata_00658_mRNA_1.1     |
| GF0050062 | 0                            | 0                         | 1                            | Hypothetical protein (1)                                          |                                                                                                                                                                                                        |                                                                                                                                                                                                                            |                                 |                              | P_trifoliata_00657_mRNA_9.1     |
| GF0050061 | 0                            | 0                         | 1                            | Hypothetical protein (1)                                          |                                                                                                                                                                                                        |                                                                                                                                                                                                                            |                                 |                              | P_trifoliata_00657_mRNA_8.1     |
| GF0050060 | 0                            | 0                         | 1                            | Hypothetical protein (1)                                          |                                                                                                                                                                                                        |                                                                                                                                                                                                                            |                                 |                              | P_trifoliata_00657_mRNA_5.1     |
| GF0050059 | 0                            | 0                         | 1                            | Hypothetical protein (1)                                          | protein kinase activity [GO:0004672] (1);<br>molecular_function (1);<br>protein phosphorylation [GO:0006468] (1);<br>biological_process (1);<br>ATP binding [GO:000524] (1);<br>molecular_function (1) | tyrosine-protein kinase, active site [IPRO08265] (1);<br>Serine-threonine/tyrosine-protein kinase catalytic domain [IPRO01245] (1);<br>Protein kinase domain [IPRO0719] (1);<br>Protein kinase-like domain [IPRO11009] (1) |                                 |                              | P_trifoliata_00657_mRNA_4.1     |
| GF0050058 | 0                            | 0                         | 1                            | Hypothetical protein (1)                                          |                                                                                                                                                                                                        |                                                                                                                                                                                                                            |                                 |                              | P_trifoliata_00657_mRNA_15.1    |

| ID        | Num. in <i>C. clementiae</i> | Num. in <i>C. canihii</i> | Num. in <i>P. trifoliata</i> | Note                                                             | GO                                                                                                                                                                                                                                                                                                                                                              | InterPro                                                                                                                                                                                                           | Members in <i>C. clementiae</i> | Members in <i>C. canihii</i> | Members in <i>P. trifoliata</i> |
|-----------|------------------------------|---------------------------|------------------------------|------------------------------------------------------------------|-----------------------------------------------------------------------------------------------------------------------------------------------------------------------------------------------------------------------------------------------------------------------------------------------------------------------------------------------------------------|--------------------------------------------------------------------------------------------------------------------------------------------------------------------------------------------------------------------|---------------------------------|------------------------------|---------------------------------|
| GF0050057 | 0                            | 0                         | 0                            | 1 Hypothetical protein (1)                                       |                                                                                                                                                                                                                                                                                                                                                                 |                                                                                                                                                                                                                    | -                               | -                            | P_trifoliata_00657_mRNA_14.1    |
| GF0050056 | 0                            | 0                         | 0                            | 1 Hypothetical protein (1)                                       |                                                                                                                                                                                                                                                                                                                                                                 |                                                                                                                                                                                                                    | -                               | -                            | P_trifoliata_00657_mRNA_12.1    |
| GF0050055 | 0                            | 0                         | 0                            | 1 Hypothetical protein (1)                                       |                                                                                                                                                                                                                                                                                                                                                                 |                                                                                                                                                                                                                    | -                               | -                            | P_trifoliata_00657_mRNA_10.1    |
| GF0050054 | 0                            | 0                         | 0                            | 1 Hypothetical protein (1)                                       |                                                                                                                                                                                                                                                                                                                                                                 |                                                                                                                                                                                                                    | -                               | -                            | P_trifoliata_00656_mRNA_7.1     |
| GF0050053 | 0                            | 0                         | 0                            | 1 NADPH-dependent codonine reductase-like protein (1)            | oxidoreductase activity [GO:0016491 molecular_function] (1); oxidation-reduction process [GO:005514 biological_process] (1)                                                                                                                                                                                                                                     | Aldo-keto reductase/potassium channel subunit beta [IPRO01395] (1); Aldo-keto reductase [IPRO20471] (1); Aldo-keto reductase, conserved site [IPRO18170] (1); NADP-dependent oxidoreductase domain [IPRO23210] (1) | -                               | -                            | P_trifoliata_00656_mRNA_6.1     |
| GF0050052 | 0                            | 0                         | 0                            | 1 Hypothetical protein (1)                                       |                                                                                                                                                                                                                                                                                                                                                                 | Reverse transcriptase domain [IPRO00477] (1)                                                                                                                                                                       | -                               | -                            | P_trifoliata_00656_mRNA_3.1     |
| GF0050051 | 0                            | 0                         | 0                            | 1 Hypothetical protein (1)                                       |                                                                                                                                                                                                                                                                                                                                                                 |                                                                                                                                                                                                                    | -                               | -                            | P_trifoliata_00655_mRNA_9.1     |
| GF0050050 | 0                            | 0                         | 0                            | 1 Homogenisate phytyltransferase 1, chloroplast (1)              | prenyltransferase activity [GO:0004659 molecular_function] (1); integral component of membrane [GO:0016021 cellular_component] (1)                                                                                                                                                                                                                              | UbiA prenyltransferase family [IPRO00537] (1)                                                                                                                                                                      | -                               | -                            | P_trifoliata_00655_mRNA_3.1     |
| GF0050049 | 0                            | 0                         | 0                            | 1 Cytokinin riboside 5'-monophosphate phosphoribohydrolase (1)   |                                                                                                                                                                                                                                                                                                                                                                 | LOG family [IPRO31100] (1)                                                                                                                                                                                         | -                               | -                            | P_trifoliata_00655_mRNA_1.1     |
| GF0050048 | 0                            | 0                         | 0                            | 1 Hypothetical protein (1)                                       |                                                                                                                                                                                                                                                                                                                                                                 |                                                                                                                                                                                                                    | -                               | -                            | P_trifoliata_00654_mRNA_21.1    |
| GF0050047 | 0                            | 0                         | 0                            | 1 NADH dehydrogenase subunit 9 (1)                               | oxidoreductase activity, acting on NADPH [GO:0016651 molecular_function] (1); NADH dehydrogenase (ubiquinone) activity [GO:0008137 molecular_function] (1); oxidation-reduction process [GO:005514 biological_process] (1)                                                                                                                                      | NADH dehydrogenase, subunit C [IPRO10218] (1); NADH:ubiquinone oxidoreductase, 308Da subunit, conserved site [IPRO23096] (1); NADH:ubiquinone oxidoreductase, 308Da subunit [IPRO1268] (1)                         | -                               | -                            | P_trifoliata_00654_mRNA_20.1    |
| GF0050046 | 0                            | 0                         | 0                            | 1 Hypothetical protein (1)                                       |                                                                                                                                                                                                                                                                                                                                                                 |                                                                                                                                                                                                                    | -                               | -                            | P_trifoliata_00654_mRNA_18.1    |
| GF0050045 | 0                            | 0                         | 0                            | 1 Hypothetical protein (1)                                       |                                                                                                                                                                                                                                                                                                                                                                 |                                                                                                                                                                                                                    | -                               | -                            | P_trifoliata_00654_mRNA_16.1    |
| GF0050044 | 0                            | 0                         | 0                            | 1 Hypothetical protein (1)                                       |                                                                                                                                                                                                                                                                                                                                                                 |                                                                                                                                                                                                                    | -                               | -                            | P_trifoliata_00654_mRNA_15.1    |
| GF0050043 | 0                            | 0                         | 0                            | 1 Hypothetical protein (1)                                       |                                                                                                                                                                                                                                                                                                                                                                 |                                                                                                                                                                                                                    | -                               | -                            | P_trifoliata_00654_mRNA_13.1    |
| GF0050042 | 0                            | 0                         | 0                            | 1 Hypothetical protein (1)                                       |                                                                                                                                                                                                                                                                                                                                                                 |                                                                                                                                                                                                                    | -                               | -                            | P_trifoliata_00654_mRNA_10.1    |
| GF0050041 | 0                            | 0                         | 0                            | 1 Hypothetical protein (1)                                       |                                                                                                                                                                                                                                                                                                                                                                 |                                                                                                                                                                                                                    | -                               | -                            | P_trifoliata_00653_mRNA_8.1     |
| GF0050040 | 0                            | 0                         | 0                            | 1 Hypothetical protein (1)                                       |                                                                                                                                                                                                                                                                                                                                                                 |                                                                                                                                                                                                                    | -                               | -                            | P_trifoliata_00653_mRNA_7.1     |
| GF0050039 | 0                            | 0                         | 0                            | 1 Hypothetical protein (1)                                       |                                                                                                                                                                                                                                                                                                                                                                 | Periplasmic binding protein-like 1 [IPRO28082] (1)                                                                                                                                                                 | -                               | -                            | P_trifoliata_00653_mRNA_6.1     |
| GF0050038 | 0                            | 0                         | 0                            | 1 Hypothetical protein (1)                                       |                                                                                                                                                                                                                                                                                                                                                                 | Periplasmic binding protein-like 1 [IPRO28082] (1); Receptor, ligand binding region [IPRO1828] (1)                                                                                                                 | -                               | -                            | P_trifoliata_00653_mRNA_4.1     |
| GF0050037 | 0                            | 0                         | 0                            | 1 General transcription factor 2-related zinc finger protein (1) | nucleic acid binding [GO:0003676 molecular_function] (1)                                                                                                                                                                                                                                                                                                        | Ribonuclease H-like domain [IPRO12337] (1); Domain of unknown function DUF4371 [IPRO25398] (1)                                                                                                                     | -                               | -                            | P_trifoliata_00653_mRNA_2.1     |
| GF0050036 | 0                            | 0                         | 0                            | 1 Hypothetical protein (1)                                       |                                                                                                                                                                                                                                                                                                                                                                 |                                                                                                                                                                                                                    | -                               | -                            | P_trifoliata_00653_mRNA_11.1    |
| GF0050035 | 0                            | 0                         | 0                            | 1 Hypothetical protein (1)                                       |                                                                                                                                                                                                                                                                                                                                                                 |                                                                                                                                                                                                                    | -                               | -                            | P_trifoliata_00653_mRNA_10.1    |
| GF0050034 | 0                            | 0                         | 0                            | 1 Hypothetical protein (1)                                       |                                                                                                                                                                                                                                                                                                                                                                 | Probable transposase, Pta/Eta/Spm, plant [IPRO04252] (1)                                                                                                                                                           | -                               | -                            | P_trifoliata_00652_mRNA_4.1     |
| GF0050033 | 0                            | 0                         | 0                            | 1 Hypothetical protein (1)                                       |                                                                                                                                                                                                                                                                                                                                                                 |                                                                                                                                                                                                                    | -                               | -                            | P_trifoliata_00651_mRNA_9.1     |
| GF0050032 | 0                            | 0                         | 0                            | 1 Hypothetical protein (1)                                       |                                                                                                                                                                                                                                                                                                                                                                 | Viral movement protein [IPRO28919] (1)                                                                                                                                                                             | -                               | -                            | P_trifoliata_00651_mRNA_4.1     |
| GF0050031 | 0                            | 0                         | 0                            | 1 Hypothetical protein (1)                                       |                                                                                                                                                                                                                                                                                                                                                                 |                                                                                                                                                                                                                    | -                               | -                            | P_trifoliata_00651_mRNA_3.1     |
| GF0050030 | 0                            | 0                         | 0                            | 1 Hypothetical protein (1)                                       | protein binding [GO:0005515 molecular_function] (1); cytoplasm [GO:0005737 cellular_component] (1); translation initiation factor activity [GO:0003743 molecular_function] (1); eukaryotic translation initiation factor 3 complex [GO:0000582 cellular_component] (1)                                                                                          | Proteasome component (PCI) domain [IPRO00717] (1); Winged helix-helix DNA-binding domain [IPRO11991] (1); Eukaryotic translation initiation factor 3 subunit E [IPRO16650] (1)                                     | -                               | -                            | P_trifoliata_00651_mRNA_14.1    |
| GF0050029 | 0                            | 0                         | 0                            | 1 Ubiquitin-conjugating enzyme E2 (1)                            |                                                                                                                                                                                                                                                                                                                                                                 | Ubiquitin-conjugating enzyme RWD-like [IPRO16135] (1); Ubiquitin-conjugating enzyme, active site [IPRO23313] (1); Ubiquitin-conjugating enzyme E2 [IPRO06068] (1)                                                  | -                               | -                            | P_trifoliata_00650_mRNA_2.1     |
| GF0050028 | 0                            | 0                         | 0                            | 1 General transcription factor (1)                               | nucleotide-cytosine repair [GO:0006289 biological_process] (1); core TFIID complex [GO:0000439 cellular_component] (1); transcription, DNA-templated [GO:0002551 biological_process] (1); ribosome [GO:0005840 cellular_component] (1); translation [GO:0006412 biological_process] (1); structural constituent of ribosome [GO:0003755 molecular_function] (1) | TFIID subunit Tfb1;p62 [IPRO27079] (1)                                                                                                                                                                             | -                               | -                            | P_trifoliata_00650_mRNA_15.2    |
| GF0050027 | 0                            | 0                         | 0                            | 1 Hypothetical protein (1)                                       |                                                                                                                                                                                                                                                                                                                                                                 | Ribosomal protein S3, C-terminal [IPRO01351] (1)                                                                                                                                                                   | -                               | -                            | P_trifoliata_00649_mRNA_9.1     |
| GF0050026 | 0                            | 0                         | 0                            | 1 Hypothetical protein (1)                                       |                                                                                                                                                                                                                                                                                                                                                                 |                                                                                                                                                                                                                    | -                               | -                            | P_trifoliata_00649_mRNA_8.1     |
| GF0050025 | 0                            | 0                         | 0                            | 1 Hypothetical protein (1)                                       |                                                                                                                                                                                                                                                                                                                                                                 |                                                                                                                                                                                                                    | -                               | -                            | P_trifoliata_00649_mRNA_7.1     |
| GF0050024 | 0                            | 0                         | 0                            | 1 Hypothetical protein (1)                                       |                                                                                                                                                                                                                                                                                                                                                                 |                                                                                                                                                                                                                    | -                               | -                            | P_trifoliata_00649_mRNA_26.1    |
| GF0050023 | 0                            | 0                         | 0                            | 1 NADH dehydrogenase subunit 9 (1)                               | oxidation-reduction process [GO:005514 biological_process] (1); NADH dehydrogenase (ubiquinone) activity [GO:0008137 molecular_function] (1)                                                                                                                                                                                                                    | NADH:ubiquinone oxidoreductase, 308Da subunit [IPRO1268] (1)                                                                                                                                                       | -                               | -                            | P_trifoliata_00649_mRNA_24.1    |
| GF0050022 | 0                            | 0                         | 0                            | 1 Hypothetical protein (1)                                       |                                                                                                                                                                                                                                                                                                                                                                 |                                                                                                                                                                                                                    | -                               | -                            | P_trifoliata_00649_mRNA_22.1    |
| GF0050021 | 0                            | 0                         | 0                            | 1 Hypothetical protein (1)                                       |                                                                                                                                                                                                                                                                                                                                                                 |                                                                                                                                                                                                                    | -                               | -                            | P_trifoliata_00649_mRNA_2.1     |
| GF0050020 | 0                            | 0                         | 0                            | 1 Hypothetical protein (1)                                       | membrane [GO:0016020 cellular_component] (1); oxidation-reduction process [GO:005514 biological_process] (1)                                                                                                                                                                                                                                                    | NADH:ubiquinone oxidoreductase, subunit 1, conserved site [IPRO18086] (1); NADH:ubiquinone oxidoreductase, subunit 1/F420H2 oxidoreductase subunit H [IPRO01694] (1)                                               | -                               | -                            | P_trifoliata_00649_mRNA_17.1    |
| GF0050019 | 0                            | 0                         | 0                            | 1 Ribosomal protein L5 (1)                                       |                                                                                                                                                                                                                                                                                                                                                                 | Ribosomal protein L5 domain [IPRO22803] (1)                                                                                                                                                                        | -                               | -                            | P_trifoliata_00649_mRNA_16.1    |
| GF0050018 | 0                            | 0                         | 0                            | 1 Hypothetical protein (1)                                       |                                                                                                                                                                                                                                                                                                                                                                 |                                                                                                                                                                                                                    | -                               | -                            | P_trifoliata_00649_mRNA_14.1    |
| GF0050017 | 0                            | 0                         | 0                            | 1 Hypothetical protein (1)                                       |                                                                                                                                                                                                                                                                                                                                                                 |                                                                                                                                                                                                                    | -                               | -                            | P_trifoliata_00649_mRNA_13.1    |
| GF0050016 | 0                            | 0                         | 0                            | 1 Hypothetical protein (1)                                       |                                                                                                                                                                                                                                                                                                                                                                 |                                                                                                                                                                                                                    | -                               | -                            | P_trifoliata_00649_mRNA_12.1    |
| GF0050015 | 0                            | 0                         | 0                            | 1 Hypothetical protein (1)                                       |                                                                                                                                                                                                                                                                                                                                                                 |                                                                                                                                                                                                                    | -                               | -                            | P_trifoliata_00649_mRNA_11.1    |
| GF0050014 | 0                            | 0                         | 0                            | 1 Hypothetical protein (1)                                       |                                                                                                                                                                                                                                                                                                                                                                 |                                                                                                                                                                                                                    | -                               | -                            | P_trifoliata_00649_mRNA_10.1    |
| GF0050013 | 0                            | 0                         | 0                            | 1 Anthocyanin 5-aromatic acyltransferase (1)                     | transferase activity, transferring acyl groups other than amino-acyl groups [GO:0016747 molecular_function] (1)                                                                                                                                                                                                                                                 | Transferase [IPRO03480] (1); Chloramphenicol acetyltransferase-like domain [IPRO21231] (1)                                                                                                                         | -                               | -                            | P_trifoliata_00648_mRNA_9.1     |
| GF0050012 | 0                            | 0                         | 0                            | 1 Hypothetical protein (1)                                       |                                                                                                                                                                                                                                                                                                                                                                 |                                                                                                                                                                                                                    | -                               | -                            | P_trifoliata_00648_mRNA_4.1     |
| GF0050011 | 0                            | 0                         | 0                            | 1 Hypothetical protein (1)                                       |                                                                                                                                                                                                                                                                                                                                                                 |                                                                                                                                                                                                                    | -                               | -                            | P_trifoliata_00648_mRNA_15.1    |
| GF0050010 | 0                            | 0                         | 0                            | 1 Hypothetical protein (1)                                       |                                                                                                                                                                                                                                                                                                                                                                 |                                                                                                                                                                                                                    | -                               | -                            | P_trifoliata_00648_mRNA_14.1    |
| GF0050009 | 0                            | 0                         | 0                            | 1 Hypothetical protein (1)                                       |                                                                                                                                                                                                                                                                                                                                                                 |                                                                                                                                                                                                                    | -                               | -                            | P_trifoliata_00648_mRNA_13.1    |
| GF0050008 | 0                            | 0                         | 0                            | 1 Hypothetical protein (1)                                       |                                                                                                                                                                                                                                                                                                                                                                 |                                                                                                                                                                                                                    | -                               | -                            | P_trifoliata_00648_mRNA_10.1    |
| GF0050007 | 0                            | 0                         | 0                            | 1 Hypothetical protein (1)                                       |                                                                                                                                                                                                                                                                                                                                                                 |                                                                                                                                                                                                                    | -                               | -                            | P_trifoliata_00648_mRNA_1.1     |
| GF0050006 | 0                            | 0                         | 0                            | 1 Hypothetical protein (1)                                       |                                                                                                                                                                                                                                                                                                                                                                 | Viral movement protein [IPRO28919] (1)                                                                                                                                                                             | -                               | -                            | P_trifoliata_00647_mRNA_5.1     |
| GF0050005 | 0                            | 0                         | 0                            | 1 Hypothetical protein (1)                                       |                                                                                                                                                                                                                                                                                                                                                                 |                                                                                                                                                                                                                    | -                               | -                            | P_trifoliata_00647_mRNA_4.1     |
| GF0050004 | 0                            | 0                         | 0                            | 1 Hypothetical protein (1)                                       |                                                                                                                                                                                                                                                                                                                                                                 |                                                                                                                                                                                                                    | -                               | -                            | P_trifoliata_00647_mRNA_3.1     |
| GF0050003 | 0                            | 0                         | 0                            | 1 Hypothetical protein (1)                                       |                                                                                                                                                                                                                                                                                                                                                                 |                                                                                                                                                                                                                    | -                               | -                            | P_trifoliata_00647_mRNA_2.1     |
| GF0050002 | 0                            | 0                         | 0                            | 1 Hypothetical protein (1)                                       |                                                                                                                                                                                                                                                                                                                                                                 |                                                                                                                                                                                                                    | -                               | -                            | P_trifoliata_00647_mRNA_13.1    |
| GF0050001 | 0                            | 0                         | 0                            | 1 Hypothetical protein (1)                                       |                                                                                                                                                                                                                                                                                                                                                                 |                                                                                                                                                                                                                    | -                               | -                            | P_trifoliata_00647_mRNA_10.1    |
| GF0050000 | 0                            | 0                         | 0                            | 1 Hypothetical protein (1)                                       | transferase activity, transferring hexosyl groups [GO:0016758 molecular_function] (1); metabolic process [GO:0008152 biological_process] (1); nucleic acid binding [GO:0003676 molecular_function] (1); DNA integration [GO:0015074 biological_process] (1)                                                                                                     | UDP-glucuronylUDP-glucosyltransferase [IPRO02213] (1)                                                                                                                                                              | -                               | -                            | P_trifoliata_00646_mRNA_8.1     |
| GF0049999 | 0                            | 0                         | 0                            | 1 Hypothetical protein (1)                                       |                                                                                                                                                                                                                                                                                                                                                                 | Integrase, catalytic core [IPRO01584] (1); Ribonuclease H-like domain [IPRO12337] (1)                                                                                                                              | -                               | -                            | P_trifoliata_00646_mRNA_4.1     |
| GF0049998 | 0                            | 0                         | 0                            | 1 Hypothetical protein (1)                                       |                                                                                                                                                                                                                                                                                                                                                                 | Protein of unknown function DUF247, plant [IPRO04188] (1)                                                                                                                                                          | -                               | -                            | P_trifoliata_00646_mRNA_2.1     |
| GF0049997 | 0                            | 0                         | 0                            | 1 Hypothetical protein (1)                                       |                                                                                                                                                                                                                                                                                                                                                                 |                                                                                                                                                                                                                    | -                               | -                            | P_trifoliata_00646_mRNA_17.1    |
| GF0049996 | 0                            | 0                         | 0                            | 1 Cytokinin riboside 5'-monophosphate phosphoribohydrolase (1)   |                                                                                                                                                                                                                                                                                                                                                                 |                                                                                                                                                                                                                    | -                               | -                            | P_trifoliata_00646_mRNA_15.1    |
| GF0049995 | 0                            | 0                         | 0                            | 1 Hypothetical protein (1)                                       |                                                                                                                                                                                                                                                                                                                                                                 |                                                                                                                                                                                                                    | -                               | -                            | P_trifoliata_00646_mRNA_14.1    |
| GF0049994 | 0                            | 0                         | 0                            | 1 Hypothetical protein (1)                                       |                                                                                                                                                                                                                                                                                                                                                                 |                                                                                                                                                                                                                    | -                               | -                            | P_trifoliata_00646_mRNA_12.1    |
| GF0049993 | 0                            | 0                         | 0                            | 1 Hypothetical protein (1)                                       |                                                                                                                                                                                                                                                                                                                                                                 |                                                                                                                                                                                                                    | -                               | -                            | P_trifoliata_00646_mRNA_11.1    |
| GF0049992 | 0                            | 0                         | 0                            | 1 Hypothetical protein (1)                                       |                                                                                                                                                                                                                                                                                                                                                                 |                                                                                                                                                                                                                    | -                               | -                            | P_trifoliata_00646_mRNA_10.1    |
| GF0049991 | 0                            | 0                         | 0                            | 1 Hypothetical protein (1)                                       | nucleic acid binding [GO:0003676 molecular_function] (1); RNA-DNA hybrid ribonuclease activity [GO:0004523 molecular_function] (1)                                                                                                                                                                                                                              | Ribonuclease H-like domain [IPRO12337] (1); Histone deacetylase domain [IPRO28011] (1); Ribonuclease H domain [IPRO02156] (1)                                                                                      | -                               | -                            | P_trifoliata_00645_mRNA_5.1     |
| GF0049990 | 0                            | 0                         | 0                            | 1 Hypothetical protein (1)                                       |                                                                                                                                                                                                                                                                                                                                                                 |                                                                                                                                                                                                                    | -                               | -                            | P_trifoliata_00645_mRNA_4.1     |
| GF0049989 | 0                            | 0                         | 0                            | 1 Hypothetical protein (1)                                       |                                                                                                                                                                                                                                                                                                                                                                 |                                                                                                                                                                                                                    | -                               | -                            | P_trifoliata_00645_mRNA_2.1     |
| GF0049988 | 0                            | 0                         | 0                            | 1 Glutathione transferase (1)                                    | protein binding [GO:0005515 molecular_function] (1)                                                                                                                                                                                                                                                                                                             | Glutathione S-transferase, C-terminal-like [IPRO10987] (1); Glutathione S-transferase, N-terminal [IPRO04045] (1); Thioredoxin-like fold [IPRO12336] (1)                                                           | -                               | -                            | P_trifoliata_00645_mRNA_11.1    |
| GF0049987 | 0                            | 0                         | 0                            | 1 Hypothetical protein (1)                                       |                                                                                                                                                                                                                                                                                                                                                                 |                                                                                                                                                                                                                    | -                               | -                            | P_trifoliata_00645_mRNA_1.1     |
| GF0049986 | 0                            | 0                         | 0                            | 1 Hypothetical protein (1)                                       |                                                                                                                                                                                                                                                                                                                                                                 | Dyneclin [IPRO19142] (1)                                                                                                                                                                                           | -                               | -                            | P_trifoliata_00644_mRNA_9.1     |
| GF0049985 | 0                            | 0                         | 0                            | 1 Hypothetical protein (1)                                       |                                                                                                                                                                                                                                                                                                                                                                 |                                                                                                                                                                                                                    | -                               | -                            | P_trifoliata_00644_mRNA_8.1     |
| GF0049984 | 0                            | 0                         | 0                            | 1 Hypothetical protein (1)                                       |                                                                                                                                                                                                                                                                                                                                                                 |                                                                                                                                                                                                                    | -                               | -                            | P_trifoliata_00644_mRNA_20.1    |
| GF0049983 | 0                            | 0                         | 0                            | 1 Hypothetical protein (1)                                       |                                                                                                                                                                                                                                                                                                                                                                 | Viral movement protein [IPRO28919] (1)                                                                                                                                                                             | -                               | -                            | P_trifoliata_00644_mRNA_19.1    |
| GF0049982 | 0                            | 0                         | 0                            | 1 Hypothetical protein (1)                                       |                                                                                                                                                                                                                                                                                                                                                                 |                                                                                                                                                                                                                    | -                               | -                            | P_trifoliata_00644_mRNA_18.1    |

| ID        | Num. in <i>C. clementiae</i> | Num. in <i>C. anthoni</i> | Num. in <i>P. trifoliata</i> | Note                                                             | GO                                                                                                                                                                                                                                                                                                                                                                                                                                                                                                                                                                                                                                                    | InterPro                                                                                                                                                                                                                                | Members in <i>C. clementiae</i> | Members in <i>C. anthoni</i> | Members in <i>P. trifoliata</i> |
|-----------|------------------------------|---------------------------|------------------------------|------------------------------------------------------------------|-------------------------------------------------------------------------------------------------------------------------------------------------------------------------------------------------------------------------------------------------------------------------------------------------------------------------------------------------------------------------------------------------------------------------------------------------------------------------------------------------------------------------------------------------------------------------------------------------------------------------------------------------------|-----------------------------------------------------------------------------------------------------------------------------------------------------------------------------------------------------------------------------------------|---------------------------------|------------------------------|---------------------------------|
| GF0049981 | 0                            | 0                         | 1                            | Hypothetical protein (1)                                         |                                                                                                                                                                                                                                                                                                                                                                                                                                                                                                                                                                                                                                                       |                                                                                                                                                                                                                                         |                                 |                              | P_trifoliata_00644_mRNA_16.1    |
| GF0049980 | 0                            | 0                         | 1                            | Hypothetical protein (1)                                         | ADP binding [GO:0043531 molecular_function] (1)                                                                                                                                                                                                                                                                                                                                                                                                                                                                                                                                                                                                       | P-loop containing nucleoside triphosphate hydrolase [IPR027417] (1); NB-ARC [IPR02182] (1)                                                                                                                                              |                                 |                              | P_trifoliata_00644_mRNA_14.1    |
| GF0049979 | 0                            | 0                         | 1                            | Hypothetical protein (1)                                         | ATP binding [GO:0005524 molecular_function] (1); protein phosphorylation [GO:0006468 biological_process] (1); protein kinase activity [GO:0004672 molecular_function] (1)                                                                                                                                                                                                                                                                                                                                                                                                                                                                             | Serine/threonine-protein kinase, active site [IPR008271] (1); Serine/threonine/tyrosine specificity protein kinase, catalytic domain [IPR002290] (1); Protein kinase domain [IPR000719] (1); Protein kinase-like domain [IPR011009] (1) |                                 |                              | P_trifoliata_00644_mRNA_1.1     |
| GF0049978 | 0                            | 0                         | 1                            | Hypothetical protein (1)                                         |                                                                                                                                                                                                                                                                                                                                                                                                                                                                                                                                                                                                                                                       |                                                                                                                                                                                                                                         |                                 |                              | P_trifoliata_00643_mRNA_9.1     |
| GF0049977 | 0                            | 0                         | 1                            | Hypothetical protein (1)                                         |                                                                                                                                                                                                                                                                                                                                                                                                                                                                                                                                                                                                                                                       |                                                                                                                                                                                                                                         |                                 |                              | P_trifoliata_00643_mRNA_6.1     |
| GF0049976 | 0                            | 0                         | 1                            | Hypothetical protein (1)                                         |                                                                                                                                                                                                                                                                                                                                                                                                                                                                                                                                                                                                                                                       |                                                                                                                                                                                                                                         |                                 |                              | P_trifoliata_00643_mRNA_4.1     |
| GF0049975 | 0                            | 0                         | 1                            | Hypothetical protein (1)                                         | transmembrane transport [GO:0055085 biological_process] (1)                                                                                                                                                                                                                                                                                                                                                                                                                                                                                                                                                                                           | Oligopeptide transporter, OPT superfamily [IPR004813] (1)                                                                                                                                                                               |                                 |                              | P_trifoliata_00643_mRNA_3.1     |
| GF0049974 | 0                            | 0                         | 1                            | Hypothetical protein (1)                                         |                                                                                                                                                                                                                                                                                                                                                                                                                                                                                                                                                                                                                                                       |                                                                                                                                                                                                                                         |                                 |                              | P_trifoliata_00643_mRNA_1.1     |
| GF0049973 | 0                            | 0                         | 1                            | Hypothetical protein (1)                                         | protein binding [GO:0005515 molecular_function] (1)                                                                                                                                                                                                                                                                                                                                                                                                                                                                                                                                                                                                   | Transposase, MuDR, plant [IPR004332] (1); F-box domain [IPR001810] (1)                                                                                                                                                                  |                                 |                              | P_trifoliata_00641_mRNA_8.1     |
| GF0049972 | 0                            | 0                         | 1                            | Hypothetical protein (1)                                         |                                                                                                                                                                                                                                                                                                                                                                                                                                                                                                                                                                                                                                                       |                                                                                                                                                                                                                                         |                                 |                              | P_trifoliata_00641_mRNA_4.1     |
| GF0049971 | 0                            | 0                         | 1                            | Hypothetical protein (1)                                         | protein binding [GO:0005515 molecular_function] (1)                                                                                                                                                                                                                                                                                                                                                                                                                                                                                                                                                                                                   | Leucine-rich repeat domain, L domain-like [IPR032675] (1); Leucine-rich repeat [IPR016140] (1)                                                                                                                                          |                                 |                              | P_trifoliata_00641_mRNA_2.1     |
| GF0049970 | 0                            | 0                         | 1                            | Hypothetical protein (1)                                         |                                                                                                                                                                                                                                                                                                                                                                                                                                                                                                                                                                                                                                                       |                                                                                                                                                                                                                                         |                                 |                              | P_trifoliata_00641_mRNA_14.1    |
| GF0049969 | 0                            | 0                         | 1                            | Hypothetical protein (1)                                         | carbohydrate metabolic process [GO:0005975 biological_process] (1); polygalacturonase activity [GO:0004650 molecular_function] (1)                                                                                                                                                                                                                                                                                                                                                                                                                                                                                                                    | Pectin lyase fold/virulence factor [IPR011050] (1); Pectin lyase fold [IPR012344] (1); Glycoside hydrolase, family 28 [IPR000743] (1)                                                                                                   |                                 |                              | P_trifoliata_00641_mRNA_10.1    |
| GF0049968 | 0                            | 0                         | 1                            | Hypothetical protein (1)                                         | protein binding [GO:0005515 molecular_function] (1)                                                                                                                                                                                                                                                                                                                                                                                                                                                                                                                                                                                                   | Leucine-rich repeat-containing N-terminal, plant-type [IPR013210] (1); Leucine-rich repeat [IPR001611] (1); Leucine-rich repeat domain, L domain-like [IPR032675] (1)                                                                   |                                 |                              | P_trifoliata_00641_mRNA_1.1     |
| GF0049967 | 0                            | 0                         | 1                            | Hypothetical protein (1)                                         |                                                                                                                                                                                                                                                                                                                                                                                                                                                                                                                                                                                                                                                       |                                                                                                                                                                                                                                         |                                 |                              | P_trifoliata_00640_mRNA_9.1     |
| GF0049966 | 0                            | 0                         | 1                            | Hypothetical protein (1)                                         |                                                                                                                                                                                                                                                                                                                                                                                                                                                                                                                                                                                                                                                       |                                                                                                                                                                                                                                         |                                 |                              | P_trifoliata_00640_mRNA_8.1     |
| GF0049965 | 0                            | 0                         | 1                            | Hypothetical protein (1)                                         |                                                                                                                                                                                                                                                                                                                                                                                                                                                                                                                                                                                                                                                       |                                                                                                                                                                                                                                         |                                 |                              | P_trifoliata_00640_mRNA_7.1     |
| GF0049964 | 0                            | 0                         | 1                            | Hypothetical protein (1)                                         |                                                                                                                                                                                                                                                                                                                                                                                                                                                                                                                                                                                                                                                       |                                                                                                                                                                                                                                         |                                 |                              | P_trifoliata_00640_mRNA_6.1     |
| GF0049963 | 0                            | 0                         | 1                            | Hypothetical protein (1)                                         |                                                                                                                                                                                                                                                                                                                                                                                                                                                                                                                                                                                                                                                       |                                                                                                                                                                                                                                         |                                 |                              | P_trifoliata_00640_mRNA_5.1     |
| GF0049962 | 0                            | 0                         | 1                            | Hypothetical protein (1)                                         |                                                                                                                                                                                                                                                                                                                                                                                                                                                                                                                                                                                                                                                       |                                                                                                                                                                                                                                         |                                 |                              | P_trifoliata_00640_mRNA_3.1     |
| GF0049961 | 0                            | 0                         | 1                            | Hypothetical protein (1)                                         |                                                                                                                                                                                                                                                                                                                                                                                                                                                                                                                                                                                                                                                       |                                                                                                                                                                                                                                         |                                 |                              | P_trifoliata_00640_mRNA_2.1     |
| GF0049960 | 0                            | 0                         | 1                            | Hypothetical protein (1)                                         |                                                                                                                                                                                                                                                                                                                                                                                                                                                                                                                                                                                                                                                       |                                                                                                                                                                                                                                         |                                 |                              | P_trifoliata_00640_mRNA_18.1    |
| GF0049959 | 0                            | 0                         | 1                            | Hypothetical protein (1)                                         |                                                                                                                                                                                                                                                                                                                                                                                                                                                                                                                                                                                                                                                       |                                                                                                                                                                                                                                         |                                 |                              | P_trifoliata_00640_mRNA_16.1    |
| GF0049958 | 0                            | 0                         | 1                            | Hypothetical protein (1)                                         |                                                                                                                                                                                                                                                                                                                                                                                                                                                                                                                                                                                                                                                       |                                                                                                                                                                                                                                         |                                 |                              | P_trifoliata_00640_mRNA_15.1    |
| GF0049957 | 0                            | 0                         | 1                            | Hypothetical protein (1)                                         |                                                                                                                                                                                                                                                                                                                                                                                                                                                                                                                                                                                                                                                       |                                                                                                                                                                                                                                         |                                 |                              | P_trifoliata_00640_mRNA_14.1    |
| GF0049956 | 0                            | 0                         | 1                            | Hypothetical protein (1)                                         |                                                                                                                                                                                                                                                                                                                                                                                                                                                                                                                                                                                                                                                       |                                                                                                                                                                                                                                         |                                 |                              | P_trifoliata_00640_mRNA_1.1     |
| GF0049955 | 0                            | 0                         | 1                            | Fatty acyl-CoA reductase 1 (1)                                   | fatty acyl-CoA reductase (alcohol-forming) activity [GO:0008019 molecular_function] (1)                                                                                                                                                                                                                                                                                                                                                                                                                                                                                                                                                               | Fatty acyl-CoA reductase [IPR020055] (1); Male sterility, NAD-binding [IPR013120] (1); NAD(P)-binding domain [IPR016040] (1)                                                                                                            |                                 |                              | P_trifoliata_00639_mRNA_5.1     |
| GF0049954 | 0                            | 0                         | 1                            | Antiporter/ drug transporter (1)                                 |                                                                                                                                                                                                                                                                                                                                                                                                                                                                                                                                                                                                                                                       |                                                                                                                                                                                                                                         |                                 |                              | P_trifoliata_00639_mRNA_3.1     |
| GF0049953 | 0                            | 0                         | 1                            | Putative wall-associated receptor kinase like 16 (1)             | ATP binding [GO:0005524 molecular_function] (1); protein kinase activity [GO:0004672 molecular_function] (1); protein phosphorylation [GO:0006468 biological_process] (1); protein dimerization activity [GO:0046983 molecular_function] (1); DNA binding [GO:0003677 molecular_function] (1)                                                                                                                                                                                                                                                                                                                                                         | Serine/threonine/tyrosine-protein kinase catalytic domain [IPR001245] (1); Protein kinase domain [IPR000719] (1); Protein kinase-like domain [IPR011009] (1)                                                                            |                                 |                              | P_trifoliata_00638_mRNA_9.1     |
| GF0049952 | 0                            | 0                         | 1                            | Hypothetical protein (1)                                         |                                                                                                                                                                                                                                                                                                                                                                                                                                                                                                                                                                                                                                                       |                                                                                                                                                                                                                                         |                                 |                              | P_trifoliata_00638_mRNA_6.1     |
| GF0049951 | 0                            | 0                         | 1                            | Putative RNA-directed DNA polymerase (Reverse transcriptase) (1) |                                                                                                                                                                                                                                                                                                                                                                                                                                                                                                                                                                                                                                                       |                                                                                                                                                                                                                                         |                                 |                              | P_trifoliata_00637_mRNA_5.1     |
| GF0049950 | 0                            | 0                         | 1                            | Hypothetical protein (1)                                         |                                                                                                                                                                                                                                                                                                                                                                                                                                                                                                                                                                                                                                                       |                                                                                                                                                                                                                                         |                                 |                              | P_trifoliata_00637_mRNA_3.1     |
| GF0049949 | 0                            | 0                         | 1                            | Hypothetical protein (1)                                         |                                                                                                                                                                                                                                                                                                                                                                                                                                                                                                                                                                                                                                                       |                                                                                                                                                                                                                                         |                                 |                              | P_trifoliata_00637_mRNA_1.1     |
| GF0049948 | 0                            | 0                         | 1                            | Hypothetical protein (1)                                         |                                                                                                                                                                                                                                                                                                                                                                                                                                                                                                                                                                                                                                                       |                                                                                                                                                                                                                                         |                                 |                              | P_trifoliata_00636_mRNA_8.1     |
| GF0049947 | 0                            | 0                         | 1                            | Hypothetical protein (1)                                         |                                                                                                                                                                                                                                                                                                                                                                                                                                                                                                                                                                                                                                                       |                                                                                                                                                                                                                                         |                                 |                              | P_trifoliata_00635_mRNA_6.1     |
| GF0049946 | 0                            | 0                         | 1                            | Hypothetical protein (1)                                         |                                                                                                                                                                                                                                                                                                                                                                                                                                                                                                                                                                                                                                                       |                                                                                                                                                                                                                                         |                                 |                              | P_trifoliata_00635_mRNA_5.1     |
| GF0049945 | 0                            | 0                         | 1                            | Hypothetical protein (1)                                         |                                                                                                                                                                                                                                                                                                                                                                                                                                                                                                                                                                                                                                                       |                                                                                                                                                                                                                                         |                                 |                              | P_trifoliata_00635_mRNA_3.1     |
| GF0049944 | 0                            | 0                         | 1                            | Inositol monophosphatase (1)                                     | phosphatidylinositol phosphorylation [GO:0046854 biological_process] (1)                                                                                                                                                                                                                                                                                                                                                                                                                                                                                                                                                                              | Inositol monophosphatase [IPR000760] (1); Inositol monophosphatase, metal-binding site [IPR020583] (1)                                                                                                                                  |                                 |                              | P_trifoliata_00635_mRNA_13.1    |
| GF0049943 | 0                            | 0                         | 1                            | Hypothetical protein (1)                                         | proteolysis [GO:0008008 biological_process] (1); peptidase activity [GO:0005233 molecular_function] (1); attachment of GPI anchor to protein [GO:0010255 biological_process] (1); GPI-anchor transamidase activity [GO:0005923 molecular_function] (1); GPI-anchor transamidase complex [GO:0042765 cellular_component] (1); oxidoreductase activity, acting on the aldehyde or oxo group of donors, NAD or NADP as acceptor [GO:0016620 molecular_function] (1); metabolic process [GO:0008152 biological_process] (1); oxidoreductase activity [GO:0016491 molecular_function] (1); oxidation-reduction process [GO:0055114 biological_process] (1) |                                                                                                                                                                                                                                         |                                 |                              | P_trifoliata_00635_mRNA_11.1    |
| GF0049942 | 0                            | 0                         | 1                            | Hypothetical protein (1)                                         |                                                                                                                                                                                                                                                                                                                                                                                                                                                                                                                                                                                                                                                       |                                                                                                                                                                                                                                         |                                 |                              | P_trifoliata_00635_mRNA_1.1     |
| GF0049941 | 0                            | 0                         | 1                            | Aldehyde dehydrogenase (1)                                       |                                                                                                                                                                                                                                                                                                                                                                                                                                                                                                                                                                                                                                                       |                                                                                                                                                                                                                                         |                                 |                              | P_trifoliata_00634_mRNA_1.1     |
| GF0049940 | 0                            | 0                         | 1                            | Hypothetical protein (1)                                         |                                                                                                                                                                                                                                                                                                                                                                                                                                                                                                                                                                                                                                                       |                                                                                                                                                                                                                                         |                                 |                              | P_trifoliata_00633_mRNA_7.1     |
| GF0049939 | 0                            | 0                         | 1                            | Hypothetical protein (1)                                         |                                                                                                                                                                                                                                                                                                                                                                                                                                                                                                                                                                                                                                                       |                                                                                                                                                                                                                                         |                                 |                              | P_trifoliata_00633_mRNA_4.1     |
| GF0049938 | 0                            | 0                         | 1                            | (+)-delta-caldesin synthase isozyme C2 (1)                       | magnesium ion binding [GO:0000287 molecular_function] (1); lyase activity [GO:0016829 molecular_function] (1); terpene synthase activity [GO:0010333 molecular_function] (1); metabolic process [GO:0008152 biological_process] (1)                                                                                                                                                                                                                                                                                                                                                                                                                   | Terpene synthase, metal-binding domain [IPR05630] (1); Terpene synthase, N-terminal domain [IPR001906] (1); Terpenoid cyclases/protein prenyltransferase alpha-alpha toroid [IPR008930] (1); Isoprenoid synthase domain [IPR008949] (1) |                                 |                              | P_trifoliata_00633_mRNA_3.1     |
| GF0049937 | 0                            | 0                         | 1                            | (-)-germanene D synthase (1)                                     | magnesium ion binding [GO:0000287 molecular_function] (1); lyase activity [GO:0016829 molecular_function] (1); terpene synthase activity [GO:0010333 molecular_function] (1)                                                                                                                                                                                                                                                                                                                                                                                                                                                                          | Terpene synthase, metal-binding domain [IPR05630] (1); Isoprenoid synthase domain [IPR008949] (1)                                                                                                                                       |                                 |                              | P_trifoliata_00633_mRNA_2.1     |
| GF0049936 | 0                            | 0                         | 1                            | Hypothetical protein (1)                                         |                                                                                                                                                                                                                                                                                                                                                                                                                                                                                                                                                                                                                                                       |                                                                                                                                                                                                                                         |                                 |                              | P_trifoliata_00633_mRNA_15.1    |
| GF0049935 | 0                            | 0                         | 1                            | Hypothetical protein (1)                                         |                                                                                                                                                                                                                                                                                                                                                                                                                                                                                                                                                                                                                                                       |                                                                                                                                                                                                                                         |                                 |                              | P_trifoliata_00633_mRNA_14.1    |
| GF0049934 | 0                            | 0                         | 1                            | Hypothetical protein (1)                                         |                                                                                                                                                                                                                                                                                                                                                                                                                                                                                                                                                                                                                                                       |                                                                                                                                                                                                                                         |                                 |                              | P_trifoliata_00633_mRNA_12.1    |
| GF0049933 | 0                            | 0                         | 1                            | Hypothetical protein (1)                                         | nucleotide binding [GO:0000166 molecular_function] (1)                                                                                                                                                                                                                                                                                                                                                                                                                                                                                                                                                                                                | Nucleotide-binding alpha-beta plait domain [IPR012677] (1); Regulator of nonsense-mediated decay, UPF3 [IPR05120] (1)                                                                                                                   |                                 |                              | P_trifoliata_00633_mRNA_10.1    |
| GF0049932 | 0                            | 0                         | 1                            | Hypothetical protein (1)                                         |                                                                                                                                                                                                                                                                                                                                                                                                                                                                                                                                                                                                                                                       |                                                                                                                                                                                                                                         |                                 |                              | P_trifoliata_00633_mRNA_1.1     |
| GF0049931 | 0                            | 0                         | 1                            | Hypothetical protein (1)                                         |                                                                                                                                                                                                                                                                                                                                                                                                                                                                                                                                                                                                                                                       |                                                                                                                                                                                                                                         |                                 |                              | P_trifoliata_00632_mRNA_1.1     |
| GF0049930 | 0                            | 0                         | 1                            | Hypothetical protein (1)                                         |                                                                                                                                                                                                                                                                                                                                                                                                                                                                                                                                                                                                                                                       |                                                                                                                                                                                                                                         |                                 |                              | P_trifoliata_00631_mRNA_9.1     |
| GF0049929 | 0                            | 0                         | 1                            | Putative disease resistance protein RGA3 (1)                     | ADP binding [GO:0043531 molecular_function] (1)                                                                                                                                                                                                                                                                                                                                                                                                                                                                                                                                                                                                       | Leucine-rich repeat domain, L domain-like [IPR032675] (1); NB-ARC [IPR002182] (1)                                                                                                                                                       |                                 |                              | P_trifoliata_00631_mRNA_4.1     |
| GF0049928 | 0                            | 0                         | 1                            | Hypothetical protein (1)                                         |                                                                                                                                                                                                                                                                                                                                                                                                                                                                                                                                                                                                                                                       |                                                                                                                                                                                                                                         |                                 |                              | P_trifoliata_00631_mRNA_14.1    |
| GF0049927 | 0                            | 0                         | 1                            | Hypothetical protein (1)                                         |                                                                                                                                                                                                                                                                                                                                                                                                                                                                                                                                                                                                                                                       |                                                                                                                                                                                                                                         |                                 |                              | P_trifoliata_00630_mRNA_3.1     |
| GF0049926 | 0                            | 0                         | 1                            | Hypothetical protein (1)                                         |                                                                                                                                                                                                                                                                                                                                                                                                                                                                                                                                                                                                                                                       |                                                                                                                                                                                                                                         |                                 |                              | P_trifoliata_00630_mRNA_1.1     |
| GF0049925 | 0                            | 0                         | 1                            | Hypothetical protein (1)                                         | protein binding [GO:0005515 molecular_function] (1)                                                                                                                                                                                                                                                                                                                                                                                                                                                                                                                                                                                                   | Tetratricopeptide-like helical domain [IPR011990] (1)                                                                                                                                                                                   |                                 |                              | P_trifoliata_00629_mRNA_15.1    |
| GF0049924 | 0                            | 0                         | 1                            | Plasma membrane ATPase (1)                                       | integral component of membrane [GO:0016021 cellular_component] (1); metal ion binding [GO:0046872 molecular_function] (1); nucleotide binding [GO:0000166 molecular_function] (1)                                                                                                                                                                                                                                                                                                                                                                                                                                                                     | P-type ATPase, cytoplasmic domain N [IPR023299] (1); P-type ATPase, transmembrane domain [IPR023298] (1); P-type ATPase [IPR001757] (1); HAD-like domain [IPR023214] (1); P-type ATPase, A domain [IPR0008250] (1)                      |                                 |                              | P_trifoliata_00628_mRNA_3.1     |
| GF0049923 | 0                            | 0                         | 1                            | Hypothetical protein (1)                                         |                                                                                                                                                                                                                                                                                                                                                                                                                                                                                                                                                                                                                                                       |                                                                                                                                                                                                                                         |                                 |                              | P_trifoliata_00628_mRNA_2.1     |
| GF0049922 | 0                            | 0                         | 1                            | Hypothetical protein (1)                                         |                                                                                                                                                                                                                                                                                                                                                                                                                                                                                                                                                                                                                                                       |                                                                                                                                                                                                                                         |                                 |                              | P_trifoliata_00628_mRNA_1.1     |
| GF0049921 | 0                            | 0                         | 1                            | UDP-glucosyltransferase 76F1 (1)                                 | transferase activity, transferring hexosyl groups [GO:0016758 molecular_function] (1); metabolic process [GO:0008152 biological_process] (1)                                                                                                                                                                                                                                                                                                                                                                                                                                                                                                          | UDP-glucosyltransferase [IPR002213] (1)                                                                                                                                                                                                 |                                 |                              | P_trifoliata_00627_mRNA_9.1     |
| GF0049920 | 0                            | 0                         | 1                            | Hypothetical protein (1)                                         |                                                                                                                                                                                                                                                                                                                                                                                                                                                                                                                                                                                                                                                       |                                                                                                                                                                                                                                         |                                 |                              | P_trifoliata_00627_mRNA_7.1     |



| ID        | Num. in <i>C. clementiae</i> | Num. in <i>C. canthii</i> | Num. in <i>P. trifoliata</i> | Note                                                                  | GO                                                                                                                                                                                                                                                                                                                | InterPro                                                                                                                                                                                                                                                   | Members in <i>C. clementiae</i> | Members in <i>C. canthii</i> | Members in <i>P. trifoliata</i> |
|-----------|------------------------------|---------------------------|------------------------------|-----------------------------------------------------------------------|-------------------------------------------------------------------------------------------------------------------------------------------------------------------------------------------------------------------------------------------------------------------------------------------------------------------|------------------------------------------------------------------------------------------------------------------------------------------------------------------------------------------------------------------------------------------------------------|---------------------------------|------------------------------|---------------------------------|
| GF0049919 | 0                            | 0                         | 1                            | Hypothetical protein (1)                                              | oxidoreductase activity, acting on paired donors, with incorporation or reduction of molecular oxygen [GO:0016705 molecular_function] (1); oxidation-reduction process [GO:005114 biological_process] (1); heme binding [GO:0020037 molecular_function] (1); iron ion binding [GO:0005506 molecular_function] (1) | Cytochrome P450 [IPR001128] (1)                                                                                                                                                                                                                            | -                               | -                            | P_trifoliata_00627_mRNA_4,1     |
| GF0049918 | 0                            | 0                         | 1                            | Hypothetical protein (1)                                              |                                                                                                                                                                                                                                                                                                                   |                                                                                                                                                                                                                                                            |                                 |                              | P_trifoliata_00627_mRNA_2,1     |
| GF0049917 | 0                            | 0                         | 1                            | Hypothetical protein (1)                                              |                                                                                                                                                                                                                                                                                                                   |                                                                                                                                                                                                                                                            |                                 |                              | P_trifoliata_00627_mRNA_1,1     |
| GF0049916 | 0                            | 0                         | 1                            | Putative disease resistance protein RGIA4 (1)                         |                                                                                                                                                                                                                                                                                                                   | Leucine-rich repeat domain, L domain-like [IPR032675] (1)                                                                                                                                                                                                  |                                 |                              | P_trifoliata_00626_mRNA_5,1     |
| GF0049915 | 0                            | 0                         | 1                            | Hypothetical protein (1)                                              |                                                                                                                                                                                                                                                                                                                   |                                                                                                                                                                                                                                                            |                                 |                              | P_trifoliata_00626_mRNA_4,1     |
| GF0049914 | 0                            | 0                         | 1                            | Pectinesterase inhibitor (1)                                          | enzyme inhibitor activity [GO:0004857 molecular_function] (1)                                                                                                                                                                                                                                                     | Pectinesterase inhibitor domain [IPR06501] (1)                                                                                                                                                                                                             |                                 |                              | P_trifoliata_00626_mRNA_3,1     |
| GF0049913 | 0                            | 0                         | 1                            | Hypothetical protein (1)                                              |                                                                                                                                                                                                                                                                                                                   |                                                                                                                                                                                                                                                            |                                 |                              | P_trifoliata_00625_mRNA_8,1     |
| GF0049912 | 0                            | 0                         | 1                            | Hypothetical protein (1)                                              |                                                                                                                                                                                                                                                                                                                   |                                                                                                                                                                                                                                                            |                                 |                              | P_trifoliata_00625_mRNA_6,1     |
| GF0049911 | 0                            | 0                         | 1                            | Hypothetical protein (1)                                              |                                                                                                                                                                                                                                                                                                                   |                                                                                                                                                                                                                                                            |                                 |                              | P_trifoliata_00625_mRNA_4,1     |
| GF0049910 | 0                            | 0                         | 1                            | Hypothetical protein (1)                                              |                                                                                                                                                                                                                                                                                                                   |                                                                                                                                                                                                                                                            |                                 |                              | P_trifoliata_00625_mRNA_3,1     |
| GF0049909 | 0                            | 0                         | 1                            | Hypothetical protein (1)                                              |                                                                                                                                                                                                                                                                                                                   |                                                                                                                                                                                                                                                            |                                 |                              | P_trifoliata_00625_mRNA_2,1     |
| GF0049908 | 0                            | 0                         | 1                            | Hypothetical protein (1)                                              |                                                                                                                                                                                                                                                                                                                   |                                                                                                                                                                                                                                                            |                                 |                              | P_trifoliata_00625_mRNA_15,1    |
| GF0049907 | 0                            | 0                         | 1                            | Hypothetical protein (1)                                              |                                                                                                                                                                                                                                                                                                                   | Ribosomal protein L18eL15P [IPR021131] (1)                                                                                                                                                                                                                 |                                 |                              | P_trifoliata_00625_mRNA_12,1    |
| GF0049906 | 0                            | 0                         | 1                            | Hypothetical protein (1)                                              |                                                                                                                                                                                                                                                                                                                   | Transposase-associated domain [IPR029480] (1)                                                                                                                                                                                                              |                                 |                              | P_trifoliata_00625_mRNA_11,1    |
| GF0049905 | 0                            | 0                         | 1                            | Hypothetical protein (1)                                              |                                                                                                                                                                                                                                                                                                                   |                                                                                                                                                                                                                                                            |                                 |                              | P_trifoliata_00624_mRNA_9,1     |
| GF0049904 | 0                            | 0                         | 1                            | Hypothetical protein (1)                                              | polysaccharide binding [GO:0030247 molecular_function] (1)                                                                                                                                                                                                                                                        | Wall-associated receptor kinase, galacturonin-binding domain [IPR025287] (1)                                                                                                                                                                               |                                 |                              | P_trifoliata_00624_mRNA_8,1     |
| GF0049903 | 0                            | 0                         | 1                            | Calmodulin binding protein, putative (1)                              | calmodulin binding [GO:0005516 molecular_function] (1); response to stress [GO:0006950 biological_process] (1)                                                                                                                                                                                                    | CALMODULIN-BINDING PROTEIN60 [IPR012416] (1)                                                                                                                                                                                                               |                                 |                              | P_trifoliata_00624_mRNA_7,1     |
| GF0049902 | 0                            | 0                         | 1                            | Hypothetical protein (1)                                              |                                                                                                                                                                                                                                                                                                                   |                                                                                                                                                                                                                                                            |                                 |                              | P_trifoliata_00624_mRNA_15,1    |
| GF0049901 | 0                            | 0                         | 1                            | Secoterpene synthase (1)                                              | metabolic process [GO:0008152 biological_process] (1); lyase activity [GO:0016829 molecular_function] (1); terpene synthase activity [GO:0010333 molecular_function] (1); magnesium ion binding [GO:0000287 molecular_function] (1)                                                                               | Isoprenoid synthase domain [IPR008949] (1); Terpene synthase, metal-binding domain [IPR005630] (1); Terpene synthase, N-terminal domain [IPR019061] (1); Terpenoid cyclases/protein prenyltransferase alpha-alpha toroid [IPR008930] (1)                   |                                 |                              | P_trifoliata_00624_mRNA_14,1    |
| GF0049900 | 0                            | 0                         | 1                            | Hypothetical protein (1)                                              | nicotin acid binding [GO:0003676 molecular_function] (1)                                                                                                                                                                                                                                                          | Ribonuclease-H-like domain [IPR012337] (1)                                                                                                                                                                                                                 |                                 |                              | P_trifoliata_00623_mRNA_7,1     |
| GF0048999 | 0                            | 0                         | 1                            | Hypothetical protein (1)                                              |                                                                                                                                                                                                                                                                                                                   |                                                                                                                                                                                                                                                            |                                 |                              | P_trifoliata_00623_mRNA_6,1     |
| GF0048998 | 0                            | 0                         | 1                            | Hypothetical protein (1)                                              |                                                                                                                                                                                                                                                                                                                   |                                                                                                                                                                                                                                                            |                                 |                              | P_trifoliata_00623_mRNA_5,1     |
| GF0048997 | 0                            | 0                         | 1                            | Hypothetical protein (1)                                              |                                                                                                                                                                                                                                                                                                                   | Leucine-rich repeat domain, L domain-like [IPR032675] (1)                                                                                                                                                                                                  |                                 |                              | P_trifoliata_00623_mRNA_4,1     |
| GF0048996 | 0                            | 0                         | 1                            | Flavonoid 3'-monooxygenase (1)                                        | heme binding [GO:0020037 molecular_function] (1); iron ion binding [GO:0005506 molecular_function] (1); oxidoreductase activity, acting on paired donors, with incorporation or reduction of molecular oxygen [GO:0016705 molecular_function] (1); oxidation-reduction process [GO:005114 biological_process] (1) | Cytochrome P450, conserved site [IPR017972] (1); Cytochrome P450, E-class, group 1 [IPR024011] (1); Cytochrome P450 [IPR001128] (1)                                                                                                                        |                                 |                              | P_trifoliata_00623_mRNA_21,1    |
| GF0048995 | 0                            | 0                         | 1                            | Hypothetical protein (1)                                              | iron ion binding [GO:0005506 molecular_function] (1); heme binding [GO:0020037 molecular_function] (1); oxidation-reduction process [GO:005114 biological_process] (1); oxidoreductase activity, acting on paired donors, with incorporation or reduction of molecular oxygen [GO:0016705 molecular_function] (1) | Cytochrome P450 [IPR001128] (1)                                                                                                                                                                                                                            |                                 |                              | P_trifoliata_00623_mRNA_20,1    |
| GF0048994 | 0                            | 0                         | 1                            | Cytochrome P450, family 706, subfamily A, polypeptide 6, putative (1) | oxidoreductase activity, acting on paired donors, with incorporation or reduction of molecular oxygen [GO:0016705 molecular_function] (1); oxidation-reduction process [GO:005114 biological_process] (1); heme binding [GO:0020037 molecular_function] (1); iron ion binding [GO:0005506 molecular_function] (1) | Cytochrome P450 [IPR001128] (1); Cytochrome P450, E-class, group 1 [IPR024011] (1); Cytochrome P450, conserved site [IPR017972] (1)                                                                                                                        |                                 |                              | P_trifoliata_00623_mRNA_18,1    |
| GF0048993 | 0                            | 0                         | 1                            | Cytochrome P450 family protein (1)                                    | oxidoreductase activity, acting on paired donors, with incorporation or reduction of molecular oxygen [GO:0016705 molecular_function] (1); iron ion binding [GO:0005506 molecular_function] (1); heme binding [GO:0020037 molecular_function] (1)                                                                 | Cytochrome P450 [IPR001128] (1)                                                                                                                                                                                                                            |                                 |                              | P_trifoliata_00623_mRNA_17,1    |
| GF0048992 | 0                            | 0                         | 1                            | Hypothetical protein (1)                                              | oxidation-reduction process [GO:005114 biological_process] (1); oxidoreductase activity, acting on paired donors, with incorporation or reduction of molecular oxygen [GO:0016705 molecular_function] (1); heme binding [GO:0020037 molecular_function] (1); iron ion binding [GO:0005506 molecular_function] (1) | Cytochrome P450 [IPR001128] (1); Cytochrome P450, E-class, group 1 [IPR024011] (1); Cytochrome P450, conserved site [IPR017972] (1)                                                                                                                        |                                 |                              | P_trifoliata_00623_mRNA_13,1    |
| GF0048991 | 0                            | 0                         | 1                            | Cytochrome P450 (1)                                                   | oxidoreductase activity, acting on paired donors, with incorporation or reduction of molecular oxygen [GO:0016705 molecular_function] (1); heme binding [GO:0020037 molecular_function] (1); iron ion binding [GO:0005506 molecular_function] (1)                                                                 | Cytochrome P450 [IPR001128] (1); Cytochrome P450, E-class, group 1 [IPR024011] (1); Cytochrome P450, conserved site [IPR017972] (1)                                                                                                                        |                                 |                              | P_trifoliata_00622_mRNA_15,1    |
| GF0048990 | 0                            | 0                         | 1                            | Hypothetical protein (1)                                              |                                                                                                                                                                                                                                                                                                                   | Gag-polypeptide of LTR copia-type [IPR029472] (1)                                                                                                                                                                                                          |                                 |                              | P_trifoliata_00622_mRNA_12,1    |
| GF0048989 | 0                            | 0                         | 1                            | Hypothetical protein (1)                                              |                                                                                                                                                                                                                                                                                                                   |                                                                                                                                                                                                                                                            |                                 |                              | P_trifoliata_00622_mRNA_11,1    |
| GF0048988 | 0                            | 0                         | 1                            | Hypothetical protein (1)                                              | protein binding [GO:0005515 molecular_function] (1)                                                                                                                                                                                                                                                               | UBX domain [IPR010121] (1); Ubiquitin-related domain [IPR029071] (1)                                                                                                                                                                                       |                                 |                              | P_trifoliata_00622_mRNA_1,1     |
| GF0048987 | 0                            | 0                         | 1                            | Hypothetical protein (1)                                              | membrane [GO:0016020 cellular_component] (1)                                                                                                                                                                                                                                                                      | Bile acid-sodium symporter/serineal resistance protein AexI [IPR026257] (1); Isopenicillin N synthase-like [IPR027443] (1)                                                                                                                                 |                                 |                              | P_trifoliata_00620_mRNA_6,1     |
| GF0048986 | 0                            | 0                         | 1                            | Hypothetical protein (1)                                              |                                                                                                                                                                                                                                                                                                                   |                                                                                                                                                                                                                                                            |                                 |                              | P_trifoliata_00620_mRNA_2,1     |
| GF0048985 | 0                            | 0                         | 1                            | Hypothetical protein (1)                                              |                                                                                                                                                                                                                                                                                                                   |                                                                                                                                                                                                                                                            |                                 |                              | P_trifoliata_00620_mRNA_10,1    |
| GF0048984 | 0                            | 0                         | 1                            | Hypothetical protein (1)                                              |                                                                                                                                                                                                                                                                                                                   |                                                                                                                                                                                                                                                            |                                 |                              | P_trifoliata_00620_mRNA_1,1     |
| GF0048983 | 0                            | 0                         | 1                            | Hypothetical protein (1)                                              | DNA binding [GO:0003677 molecular_function] (1); transcription factor activity, sequence-specific DNA binding [GO:0003700 molecular_function] (1); regulation of transcription, DNA-templated [GO:0006355 biological_process] (1)                                                                                 | DNA-binding domain [IPR016177] (1); AP2/ERF domain [IPR014711] (1)                                                                                                                                                                                         |                                 |                              | P_trifoliata_00619_mRNA_9,1     |
| GF0048982 | 0                            | 0                         | 1                            | Hypothetical protein (1)                                              |                                                                                                                                                                                                                                                                                                                   |                                                                                                                                                                                                                                                            |                                 |                              | P_trifoliata_00619_mRNA_19,1    |
| GF0048981 | 0                            | 0                         | 1                            | Hypothetical protein (1)                                              | protein serine/threonine kinase activity [GO:0004674 molecular_function] (1); protein kinase activity [GO:0004672 molecular_function] (1); protein phosphorylation [GO:0006468 biological_process] (1); ATP binding [GO:0005524 molecular_function] (1)                                                           | Protein kinase domain [IPR000719] (1); Protein kinase-like domain [IPR011009] (1); S-locus receptor kinase, C-terminal [IPR018201] (1); Serine-threonine/tyrosine-protein kinase catalytic domain [IPR012451] (1); Bulb-type lectin domain [IPR001480] (1) |                                 |                              | P_trifoliata_00619_mRNA_15,1    |
| GF0048980 | 0                            | 0                         | 1                            | Hypothetical protein (1)                                              |                                                                                                                                                                                                                                                                                                                   |                                                                                                                                                                                                                                                            |                                 |                              | P_trifoliata_00619_mRNA_12,1    |
| GF0048979 | 0                            | 0                         | 1                            | Glutathione S-transferase tau 7, putative (1)                         | protein binding [GO:0005515 molecular_function] (1)                                                                                                                                                                                                                                                               | Glutathione S-transferase, N-terminal [IPR004045] (1); Glutathione S-transferase, C-terminal-like [IPR010987] (1); Thioredoxin-like fold [IPR012336] (1)                                                                                                   |                                 |                              | P_trifoliata_00618_mRNA_9,1     |
| GF0048978 | 0                            | 0                         | 1                            | Tau class glutathione S-transferase (1)                               | protein binding [GO:0005515 molecular_function] (1)                                                                                                                                                                                                                                                               | Glutathione S-transferase, C-terminal-like [IPR010987] (1); Glutathione S-transferase, N-terminal [IPR004045] (1); Glutathione S-transferase, C-terminal [IPR004046] (1); Thioredoxin-like fold [IPR012336] (1)                                            |                                 |                              | P_trifoliata_00618_mRNA_6,1     |
| GF0048977 | 0                            | 0                         | 1                            | Tau class glutathione S-transferase (1)                               | protein binding [GO:0005515 molecular_function] (1)                                                                                                                                                                                                                                                               | Thioredoxin-like fold [IPR012336] (1); Glutathione S-transferase, C-terminal [IPR004046] (1); Glutathione S-transferase, C-terminal-like [IPR010987] (1); Glutathione S-transferase, N-terminal [IPR004045] (1)                                            |                                 |                              | P_trifoliata_00618_mRNA_5,1     |
| GF0048976 | 0                            | 0                         | 1                            | Hypothetical protein (1)                                              | serpin-type endopeptidase activity [GO:0001199 molecular_function] (1); proteolysis [GO:0006508 biological_process] (1)                                                                                                                                                                                           | Aspartic peptidase A1 family [IPR014611] (1); Peptidase family A1 domain [IPR033121] (1); Aspartic peptidase domain [IPR021109] (1)                                                                                                                        |                                 |                              | P_trifoliata_00618_mRNA_3,1     |
| GF0048975 | 0                            | 0                         | 1                            | Hypothetical protein (1)                                              |                                                                                                                                                                                                                                                                                                                   |                                                                                                                                                                                                                                                            |                                 |                              | P_trifoliata_00618_mRNA_17,1    |
| GF0048974 | 0                            | 0                         | 1                            | Hypothetical protein (1)                                              |                                                                                                                                                                                                                                                                                                                   |                                                                                                                                                                                                                                                            |                                 |                              | P_trifoliata_00618_mRNA_16,1    |
| GF0048973 | 0                            | 0                         | 1                            | Hypothetical protein (1)                                              |                                                                                                                                                                                                                                                                                                                   |                                                                                                                                                                                                                                                            |                                 |                              | P_trifoliata_00618_mRNA_1,1     |

| ID        | Num. in <i>C. clementiae</i> | Num. in <i>C. canthii</i> | Num. in <i>P. trifoliata</i> | Note                                                                        | GO                                                                                                                                                                                                                                                                                                                | InterPro                                                                                                                                                                                                                                 | Members in <i>C. clementiae</i> | Members in <i>C. canthii</i> | Members in <i>P. trifoliata</i> |
|-----------|------------------------------|---------------------------|------------------------------|-----------------------------------------------------------------------------|-------------------------------------------------------------------------------------------------------------------------------------------------------------------------------------------------------------------------------------------------------------------------------------------------------------------|------------------------------------------------------------------------------------------------------------------------------------------------------------------------------------------------------------------------------------------|---------------------------------|------------------------------|---------------------------------|
| GF0049872 | 0                            | 0                         | 1                            | Hypothetical protein (1)                                                    | metallocarboxypeptidase activity [GO:000181 molecular_function] (1); zinc ion binding [GO:0008270 molecular_function] (1); proteolysis [GO:0006508 biological_process] (1)                                                                                                                                        | Peptidase M14, carboxypeptidase A [IPR000834] (1)                                                                                                                                                                                        | -                               | -                            | P_trifoliata_00617_mRNA_7,1     |
| GF0049871 | 0                            | 0                         | 1                            | Hypothetical protein (1)                                                    |                                                                                                                                                                                                                                                                                                                   | DNA-binding pseudobarrel domain [IPR01530] (1)                                                                                                                                                                                           | -                               | -                            | P_trifoliata_00617_mRNA_5,1     |
| GF0049870 | 0                            | 0                         | 1                            | Hypothetical protein (1)                                                    | mitochondrial respiratory chain complex III assembly [GO:0034551 biological_process] (1)                                                                                                                                                                                                                          | Mitochondrial chaperone BCS1 plant AAA A1 Pases [IPR027243] (1); AAA-type A1 Pases, N-terminal domain [IPR025753] (1)                                                                                                                    | -                               | -                            | P_trifoliata_00617_mRNA_1,1     |
| GF0049869 | 0                            | 0                         | 1                            | Hypothetical protein (1)                                                    |                                                                                                                                                                                                                                                                                                                   |                                                                                                                                                                                                                                          | -                               | -                            | P_trifoliata_00616_mRNA_5,1     |
| GF0049868 | 0                            | 0                         | 1                            | Hypothetical protein (1)                                                    |                                                                                                                                                                                                                                                                                                                   |                                                                                                                                                                                                                                          | -                               | -                            | P_trifoliata_00616_mRNA_2,1     |
| GF0049867 | 0                            | 0                         | 1                            | Hypothetical protein (1)                                                    |                                                                                                                                                                                                                                                                                                                   |                                                                                                                                                                                                                                          | -                               | -                            | P_trifoliata_00616_mRNA_10,1    |
| GF0049866 | 0                            | 0                         | 1                            | Hypothetical protein (1)                                                    |                                                                                                                                                                                                                                                                                                                   |                                                                                                                                                                                                                                          | -                               | -                            | P_trifoliata_00616_mRNA_1,1     |
| GF0049865 | 0                            | 0                         | 1                            | Hypothetical protein (1)                                                    |                                                                                                                                                                                                                                                                                                                   |                                                                                                                                                                                                                                          | -                               | -                            | P_trifoliata_00615_mRNA_9,1     |
| GF0049864 | 0                            | 0                         | 1                            | Hypothetical protein (1)                                                    |                                                                                                                                                                                                                                                                                                                   | Retrotansposon gag domain [IPR005162] (1)                                                                                                                                                                                                | -                               | -                            | P_trifoliata_00615_mRNA_2,1     |
| GF0049863 | 0                            | 0                         | 1                            | Hypothetical protein (1)                                                    |                                                                                                                                                                                                                                                                                                                   |                                                                                                                                                                                                                                          | -                               | -                            | P_trifoliata_00615_mRNA_18,1    |
| GF0049862 | 0                            | 0                         | 1                            | Hypothetical protein (1)                                                    |                                                                                                                                                                                                                                                                                                                   | Retroviral aspartyl protease [IPR013242] (1)                                                                                                                                                                                             | -                               | -                            | P_trifoliata_00615_mRNA_15,1    |
| GF0049861 | 0                            | 0                         | 1                            | Cytochrome P450 82A4 (1)                                                    | oxidation-reduction process [GO:005114 biological_process] (1); oxidoreductase activity, acting on paired donors, with incorporation or reduction of molecular oxygen [GO:0016705 molecular_function] (1); heme binding [GO:0020037 molecular_function] (1); iron ion binding [GO:0005506 molecular_function] (1) | Cytochrome P450, conserved site [IPR017972] (1); Cytochrome P450, E-class, group 1 [IPR024012] (1); Cytochrome P450 [IPR001128] (1)                                                                                                      | -                               | -                            | P_trifoliata_00615_mRNA_11,1    |
| GF0049860 | 0                            | 0                         | 1                            | Hypothetical protein (1)                                                    |                                                                                                                                                                                                                                                                                                                   |                                                                                                                                                                                                                                          | -                               | -                            | P_trifoliata_00615_mRNA_10,1    |
| GF0049859 | 0                            | 0                         | 1                            | Hypothetical protein (1)                                                    |                                                                                                                                                                                                                                                                                                                   |                                                                                                                                                                                                                                          | -                               | -                            | P_trifoliata_00614_mRNA_9,1     |
| GF0049858 | 0                            | 0                         | 1                            | Disease resistance RPM1-like protein (1)                                    |                                                                                                                                                                                                                                                                                                                   | Leucine-rich repeat domain, L domain-like [IPR032675] (1)                                                                                                                                                                                | -                               | -                            | P_trifoliata_00614_mRNA_3,1     |
| GF0049857 | 0                            | 0                         | 1                            | H/ACA ribonucleoprotein complex subunit 2-like protein (1)                  | nucleolus [GO:0005730 cellular_component] (1); RNA binding [GO:0001723 molecular_function] (1)                                                                                                                                                                                                                    | H/ACA ribonucleoprotein complex, subunit Nhp2, eukaryote [IPR002415] (1); Ribosomal protein L7Ae1,2bc S12e-Gad445 [IPR004038] (1); 50S ribosomal protein L30e-like [IPR029064] (1)                                                       | -                               | -                            | P_trifoliata_00614_mRNA_26,1    |
| GF0049856 | 0                            | 0                         | 1                            | Hypothetical protein (1)                                                    |                                                                                                                                                                                                                                                                                                                   |                                                                                                                                                                                                                                          | -                               | -                            | P_trifoliata_00614_mRNA_17,1    |
| GF0049855 | 0                            | 0                         | 1                            | Hypothetical protein (1)                                                    |                                                                                                                                                                                                                                                                                                                   |                                                                                                                                                                                                                                          | -                               | -                            | P_trifoliata_00614_mRNA_13,1    |
| GF0049854 | 0                            | 0                         | 1                            | Hypothetical protein (1)                                                    | cellulose biosynthetic process [GO:0030244 biological_process] (1); cellulose synthase (UDP-forming) activity [GO:0016760 molecular_function] (1); membrane [GO:0016020 cellular_component] (1)                                                                                                                   | Cellulose synthase [IPR005150] (1)                                                                                                                                                                                                       | -                               | -                            | P_trifoliata_00614_mRNA_11,1    |
| GF0049853 | 0                            | 0                         | 1                            | Cellulose synthase-like CSLG, family GT2 (1)                                | membrane [GO:0016020 cellular_component] (1); cellulose synthase (UDP-forming) activity [GO:0016760 molecular_function] (1); cellulose biosynthetic process [GO:005244 biological_process] (1)                                                                                                                    | Nucleotide-diphospho-sugar transferases [IPR029044] (1); Cellulose synthase [IPR005150] (1)                                                                                                                                              | -                               | -                            | P_trifoliata_00614_mRNA_10,1    |
| GF0049852 | 0                            | 0                         | 1                            | Hypothetical protein (1)                                                    |                                                                                                                                                                                                                                                                                                                   | Reverse transcriptase zinc-binding domain [IPR029060] (1)                                                                                                                                                                                | -                               | -                            | P_trifoliata_00614_mRNA_1,1     |
| GF0049851 | 0                            | 0                         | 1                            | Transcription factor bHLH35 (1)                                             | protein dimerization activity [GO:0046983 molecular_function] (1)                                                                                                                                                                                                                                                 | Myo-type, basic helix-loop-helix (bHLH) domain [IPR011598] (1); Isoprenoid synthase domain [IPR008949] (1)                                                                                                                               | -                               | -                            | P_trifoliata_00613_mRNA_4,1     |
| GF0049850 | 0                            | 0                         | 1                            | Hypothetical protein (1)                                                    |                                                                                                                                                                                                                                                                                                                   |                                                                                                                                                                                                                                          | -                               | -                            | P_trifoliata_00613_mRNA_3,1     |
| GF0049849 | 0                            | 0                         | 1                            | Hypothetical protein (1)                                                    |                                                                                                                                                                                                                                                                                                                   |                                                                                                                                                                                                                                          | -                               | -                            | P_trifoliata_00613_mRNA_21,1    |
| GF0049848 | 0                            | 0                         | 1                            | Hypothetical protein (1)                                                    | metal ion binding [GO:0046872 molecular_function] (1)                                                                                                                                                                                                                                                             | Zinc finger, C2H2 [IPR007087] (1)                                                                                                                                                                                                        | -                               | -                            | P_trifoliata_00613_mRNA_20,1    |
| GF0049847 | 0                            | 0                         | 1                            | Hypothetical protein (1)                                                    | terpene synthase activity [GO:0010333 molecular_function] (1); lyase activity [GO:0016829 molecular_function] (1); magnesium ion binding [GO:0000287 molecular_function] (1)                                                                                                                                      | Isoprenoid synthase domain [IPR008949] (1); Terpene synthase, metal-binding domain [IPR005630] (1)                                                                                                                                       | -                               | -                            | P_trifoliata_00613_mRNA_2,1     |
| GF0049846 | 0                            | 0                         | 1                            | Hypothetical protein (1)                                                    |                                                                                                                                                                                                                                                                                                                   |                                                                                                                                                                                                                                          | -                               | -                            | P_trifoliata_00612_mRNA_21,1    |
| GF0049845 | 0                            | 0                         | 1                            | Hypothetical protein (1)                                                    |                                                                                                                                                                                                                                                                                                                   |                                                                                                                                                                                                                                          | -                               | -                            | P_trifoliata_00612_mRNA_20,1    |
| GF0049844 | 0                            | 0                         | 1                            | Hypothetical protein (1)                                                    |                                                                                                                                                                                                                                                                                                                   |                                                                                                                                                                                                                                          | -                               | -                            | P_trifoliata_00612_mRNA_19,1    |
| GF0049843 | 0                            | 0                         | 1                            | Hypothetical protein (1)                                                    |                                                                                                                                                                                                                                                                                                                   |                                                                                                                                                                                                                                          | -                               | -                            | P_trifoliata_00612_mRNA_18,1    |
| GF0049842 | 0                            | 0                         | 1                            | Hypothetical protein (1)                                                    |                                                                                                                                                                                                                                                                                                                   |                                                                                                                                                                                                                                          | -                               | -                            | P_trifoliata_00612_mRNA_16,1    |
| GF0049841 | 0                            | 0                         | 1                            | Hypothetical protein (1)                                                    | zinc ion binding [GO:0008270 molecular_function] (1); nucleic acid binding [GO:0003676 molecular_function] (1)                                                                                                                                                                                                    | Zinc finger, CCHC-type [IPR01878] (1)                                                                                                                                                                                                    | -                               | -                            | P_trifoliata_00612_mRNA_13,1    |
| GF0049840 | 0                            | 0                         | 1                            | Hypothetical protein (1)                                                    |                                                                                                                                                                                                                                                                                                                   |                                                                                                                                                                                                                                          | -                               | -                            | P_trifoliata_00612_mRNA_11,1    |
| GF0049839 | 0                            | 0                         | 1                            | Hypothetical protein (1)                                                    |                                                                                                                                                                                                                                                                                                                   |                                                                                                                                                                                                                                          | -                               | -                            | P_trifoliata_00612_mRNA_1,1     |
| GF0049838 | 0                            | 0                         | 1                            | Hypothetical protein (1)                                                    | microtubule [GO:0005874 cellular_component] (1); structural constituent of cytoskeleton [GO:005200 molecular_function] (1); GTP binding [GO:0005525 molecular_function] (1); microtubule-based process [GO:0007017 biological_process] (1)                                                                        | Beta tubulin [IPR002453] (1); Glyoxal oxidase, N-terminal [IPR009800] (1); Tubulin [IPR000217] (1); Tubulin-PaZ, C-terminal [IPR008280] (1); Tubulin, C-terminal [IPR025123] (1)                                                         | -                               | -                            | P_trifoliata_00611_mRNA_9,1     |
| GF0049837 | 0                            | 0                         | 1                            | Hypothetical protein (1)                                                    |                                                                                                                                                                                                                                                                                                                   |                                                                                                                                                                                                                                          | -                               | -                            | P_trifoliata_00611_mRNA_3,1     |
| GF0049836 | 0                            | 0                         | 1                            | Hypothetical protein (1)                                                    |                                                                                                                                                                                                                                                                                                                   |                                                                                                                                                                                                                                          | -                               | -                            | P_trifoliata_00611_mRNA_2,1     |
| GF0049835 | 0                            | 0                         | 1                            | Strictosidine synthase family protein (1)                                   | biosynthetic process [GO:0009058 biological_process] (1); strictosidine synthase activity [GO:0016844 molecular_function] (1)                                                                                                                                                                                     | Strictosidine synthase [IPR00441] (1); Strictosidine synthase, conserved region [IPR018119] (1); Six-bladed beta propeller, TolB-like [IPR011042] (1)                                                                                    | -                               | -                            | P_trifoliata_00611_mRNA_13,1    |
| GF0049834 | 0                            | 0                         | 1                            | Hypothetical protein (1)                                                    |                                                                                                                                                                                                                                                                                                                   | Endonuclease/exonuclease/phosphatase [IPR005135] (1)                                                                                                                                                                                     | -                               | -                            | P_trifoliata_00610_mRNA_2,1     |
| GF0049833 | 0                            | 0                         | 1                            | Hypothetical protein (1)                                                    |                                                                                                                                                                                                                                                                                                                   |                                                                                                                                                                                                                                          | -                               | -                            | P_trifoliata_00609_mRNA_8,1     |
| GF0049832 | 0                            | 0                         | 1                            | Hypothetical protein (1)                                                    |                                                                                                                                                                                                                                                                                                                   |                                                                                                                                                                                                                                          | -                               | -                            | P_trifoliata_00609_mRNA_13,1    |
| GF0049831 | 0                            | 0                         | 1                            | Hypothetical protein (1)                                                    |                                                                                                                                                                                                                                                                                                                   | Leucine-rich repeat domain, L domain-like [IPR032675] (1)                                                                                                                                                                                | -                               | -                            | P_trifoliata_00609_mRNA_12,1    |
| GF0049830 | 0                            | 0                         | 1                            | LRR receptor-like kinase (1)                                                | protein binding [GO:0005515 molecular_function] (1)                                                                                                                                                                                                                                                               | Leucine-rich repeat [IPR001611] (1); Leucine-rich repeat domain, L domain-like [IPR032675] (1)                                                                                                                                           | -                               | -                            | P_trifoliata_00609_mRNA_11,1    |
| GF0049829 | 0                            | 0                         | 1                            | Hypothetical protein (1)                                                    |                                                                                                                                                                                                                                                                                                                   |                                                                                                                                                                                                                                          | -                               | -                            | P_trifoliata_00609_mRNA_10,1    |
| GF0049828 | 0                            | 0                         | 1                            | Hypothetical protein (1)                                                    |                                                                                                                                                                                                                                                                                                                   |                                                                                                                                                                                                                                          | -                               | -                            | P_trifoliata_00609_mRNA_1,1     |
| GF0049827 | 0                            | 0                         | 1                            | Hypothetical protein (1)                                                    |                                                                                                                                                                                                                                                                                                                   |                                                                                                                                                                                                                                          | -                               | -                            | P_trifoliata_00608_mRNA_7,1     |
| GF0049826 | 0                            | 0                         | 1                            | Hypothetical protein (1)                                                    |                                                                                                                                                                                                                                                                                                                   |                                                                                                                                                                                                                                          | -                               | -                            | P_trifoliata_00608_mRNA_15,1    |
| GF0049825 | 0                            | 0                         | 1                            | Hypothetical protein (1)                                                    |                                                                                                                                                                                                                                                                                                                   | Leucine-rich repeat domain, L domain-like [IPR032675] (1)                                                                                                                                                                                | -                               | -                            | P_trifoliata_00608_mRNA_13,1    |
| GF0049824 | 0                            | 0                         | 1                            | Hypothetical protein (1)                                                    |                                                                                                                                                                                                                                                                                                                   |                                                                                                                                                                                                                                          | -                               | -                            | P_trifoliata_00608_mRNA_11,1    |
| GF0049823 | 0                            | 0                         | 1                            | Hypothetical protein (1)                                                    |                                                                                                                                                                                                                                                                                                                   |                                                                                                                                                                                                                                          | -                               | -                            | P_trifoliata_00608_mRNA_10,1    |
| GF0049822 | 0                            | 0                         | 1                            | Limonene synthase (1)                                                       | lyase activity [GO:0016829 molecular_function] (1); terpene synthase activity [GO:0010333 molecular_function] (1); magnesium ion binding [GO:0000287 molecular_function] (1); metabolic process [GO:0008152 biological_process] (1)                                                                               | Isoprenoid synthase domain [IPR008949] (1); Terpene synthase, N-terminal domain [IPR001906] (1); Terpene synthase, metal-binding domain [IPR005630] (1); Terpenoid cyclases/protein prenyltransferase alpha-alpha teroid [IPR008930] (1) | -                               | -                            | P_trifoliata_00607_mRNA_9,1     |
| GF0049821 | 0                            | 0                         | 1                            | Hypothetical protein (1)                                                    |                                                                                                                                                                                                                                                                                                                   |                                                                                                                                                                                                                                          | -                               | -                            | P_trifoliata_00607_mRNA_7,1     |
| GF0049820 | 0                            | 0                         | 1                            | C2 domain-containing protein / GRAM domain-containing protein isoform 4 (1) | protein binding [GO:0005515 molecular_function] (1)                                                                                                                                                                                                                                                               | C2 domain [IPR000008] (1)                                                                                                                                                                                                                | -                               | -                            | P_trifoliata_00607_mRNA_6,1     |
| GF0049819 | 0                            | 0                         | 1                            | Hypothetical protein (1)                                                    |                                                                                                                                                                                                                                                                                                                   |                                                                                                                                                                                                                                          | -                               | -                            | P_trifoliata_00607_mRNA_4,1     |
| GF0049818 | 0                            | 0                         | 1                            | Hypothetical protein (1)                                                    | polyamine biosynthetic process [GO:0006596 biological_process] (1); catalytic activity [GO:0003824 molecular_function] (1)                                                                                                                                                                                        | PLP-binding barrel [IPR029066] (1); Ornithine decarboxylase [IPR002433] (1); One-Carboxy-Arg decarboxylase 2, N-terminal [IPR022644] (1)                                                                                                 | -                               | -                            | P_trifoliata_00607_mRNA_2,1     |
| GF0049817 | 0                            | 0                         | 1                            | Hypothetical protein (1)                                                    | protein binding [GO:0005515 molecular_function] (1)                                                                                                                                                                                                                                                               | Kelch-type beta propeller [IPR015915] (1)                                                                                                                                                                                                | -                               | -                            | P_trifoliata_00607_mRNA_13,1    |
| GF0049816 | 0                            | 0                         | 1                            | Hypothetical protein (1)                                                    |                                                                                                                                                                                                                                                                                                                   |                                                                                                                                                                                                                                          | -                               | -                            | P_trifoliata_00607_mRNA_1,1     |
| GF0049815 | 0                            | 0                         | 1                            | Hypothetical protein (1)                                                    |                                                                                                                                                                                                                                                                                                                   |                                                                                                                                                                                                                                          | -                               | -                            | P_trifoliata_00606_mRNA_9,1     |
| GF0049814 | 0                            | 0                         | 1                            | Hypothetical protein (1)                                                    |                                                                                                                                                                                                                                                                                                                   | Chromo domain-like [IPR016197] (1); Chromo domain [IPR023780] (1); LOG family [IPR031100] (1)                                                                                                                                            | -                               | -                            | P_trifoliata_00606_mRNA_2,1     |
| GF0049813 | 0                            | 0                         | 1                            | Hypothetical protein (1)                                                    |                                                                                                                                                                                                                                                                                                                   |                                                                                                                                                                                                                                          | -                               | -                            | P_trifoliata_00606_mRNA_14,1    |
| GF0049812 | 0                            | 0                         | 1                            | Hypothetical protein (1)                                                    |                                                                                                                                                                                                                                                                                                                   |                                                                                                                                                                                                                                          | -                               | -                            | P_trifoliata_00606_mRNA_1,1     |
| GF0049811 | 0                            | 0                         | 1                            | Mitochondrial ribosomal protein S14 (1)                                     | structural constituent of ribosome [GO:0003735 molecular_function] (1); translation [GO:0006412 biological_process] (1); intracellular ribosome [GO:0005840 cellular_component] (1)                                                                                                                               | Ribosomal protein S14, conserved site [IPR018271] (1); Ribosomal protein S14 [IPR001209] (1)                                                                                                                                             | -                               | -                            | P_trifoliata_00605_mRNA_21,1    |
| GF0049810 | 0                            | 0                         | 1                            | Hypothetical protein (1)                                                    | DNA binding [GO:0003677 molecular_function] (1)                                                                                                                                                                                                                                                                   | SANT/Myb domain [IPR001005] (1); Homeodomain-like [IPR009057] (1); Myb-like domain [IPR017877] (1)                                                                                                                                       | -                               | -                            | P_trifoliata_00605_mRNA_16,1    |
| GF0049809 | 0                            | 0                         | 1                            | Hypothetical protein (1)                                                    |                                                                                                                                                                                                                                                                                                                   |                                                                                                                                                                                                                                          | -                               | -                            | P_trifoliata_00605_mRNA_11,1    |
| GF0049808 | 0                            | 0                         | 1                            | Hypothetical protein (1)                                                    |                                                                                                                                                                                                                                                                                                                   | Transposase, MuDR, plant [IPR004332] (1)                                                                                                                                                                                                 | -                               | -                            | P_trifoliata_00604_mRNA_20,1    |
| GF0049807 | 0                            | 0                         | 1                            | Hypothetical protein (1)                                                    |                                                                                                                                                                                                                                                                                                                   |                                                                                                                                                                                                                                          | -                               | -                            | P_trifoliata_00604_mRNA_2,1     |

| ID        | Num. in <i>C. clementiae</i> | Num. in <i>C. autohii</i> | Num. in <i>P. trifoliata</i> | Note                                               | GO                                                                                                                                                                                             | InterPro                                                                                                                                                                                                                | Members in <i>C. clementiae</i> | Members in <i>C. autohii</i> | Members in <i>P. trifoliata</i> |
|-----------|------------------------------|---------------------------|------------------------------|----------------------------------------------------|------------------------------------------------------------------------------------------------------------------------------------------------------------------------------------------------|-------------------------------------------------------------------------------------------------------------------------------------------------------------------------------------------------------------------------|---------------------------------|------------------------------|---------------------------------|
| GF0049806 | 0                            | 0                         | 0                            | 1 Hypothetical protein (1)                         |                                                                                                                                                                                                |                                                                                                                                                                                                                         |                                 |                              | P_trifoliata_06004_mRNA_18.1    |
| GF0049805 | 0                            | 0                         | 0                            | 1 Putative peptidase C48 domain family protein (1) | cysteine-type peptidase activity [GO:000224 molecular_function] (1); proteolysis [GO:0005008 biological_process] (1)                                                                           | Ulp1 protease family, C-terminal catalytic domain [IPRO03653] (1)                                                                                                                                                       |                                 |                              | P_trifoliata_06004_mRNA_16.1    |
| GF0049804 | 0                            | 0                         | 0                            | 1 Lipid transfer protein (1)                       |                                                                                                                                                                                                | Bifunctional inhibitor/plant lipid transfer protein/seed storage helical domain [IPRO16140] (1)                                                                                                                         |                                 |                              | P_trifoliata_06004_mRNA_12.1    |
| GF0049803 | 0                            | 0                         | 0                            | 1 Hypothetical protein (1)                         |                                                                                                                                                                                                |                                                                                                                                                                                                                         |                                 |                              | P_trifoliata_06003_mRNA_3.1     |
| GF0049802 | 0                            | 0                         | 0                            | 1 Hypothetical protein (1)                         |                                                                                                                                                                                                |                                                                                                                                                                                                                         |                                 |                              | P_trifoliata_06003_mRNA_18.1    |
| GF0049801 | 0                            | 0                         | 0                            | 1 Hypothetical protein (1)                         |                                                                                                                                                                                                |                                                                                                                                                                                                                         |                                 |                              | P_trifoliata_06003_mRNA_16.1    |
| GF0049800 | 0                            | 0                         | 0                            | 1 Pumilio-family RNA-binding repeat protein (1)    | binding [GO:0005488 molecular_function] (1); RNA binding [GO:0003723 molecular_function] (1)                                                                                                   | Pumilio homology domain [IPRO3133] (1); Armadillo-type fold [IPRO16024] (1); Armadillo-like helical [IPRO11989] (1); Pumilio RNA-binding repeat [IPRO01313] (1)                                                         |                                 |                              | P_trifoliata_06002_mRNA_6.1     |
| GF0049799 | 0                            | 0                         | 0                            | 1 Hypothetical protein (1)                         |                                                                                                                                                                                                |                                                                                                                                                                                                                         |                                 |                              | P_trifoliata_06002_mRNA_20.1    |
| GF0049798 | 0                            | 0                         | 0                            | 1 Hypothetical protein (1)                         |                                                                                                                                                                                                |                                                                                                                                                                                                                         |                                 |                              | P_trifoliata_06001_mRNA_8.1     |
| GF0049797 | 0                            | 0                         | 0                            | 1 Hypothetical protein (1)                         |                                                                                                                                                                                                |                                                                                                                                                                                                                         |                                 |                              | P_trifoliata_06001_mRNA_6.1     |
| GF0049796 | 0                            | 0                         | 0                            | 1 Hypothetical protein (1)                         |                                                                                                                                                                                                | Protein of unknown function DUF247, plant [IPRO04188] (1)                                                                                                                                                               |                                 |                              | P_trifoliata_06001_mRNA_5.1     |
| GF0049795 | 0                            | 0                         | 0                            | 1 Serine/threonine-protein kinase fray2 (1)        | ATP binding [GO:0005524 molecular_function] (1); protein phosphorylation [GO:0006468 biological_process] (1); protein kinase activity [GO:0004672 molecular_function] (1)                      | Protein kinase domain [IPRO00719] (1); Protein kinase-like domain [IPRO11009] (1); Protein kinase, ATP binding site [IPRO17441] (1); Serine/threonine/dual specificity protein kinase, catalytic domain [IPRO02290] (1) |                                 |                              | P_trifoliata_06001_mRNA_4.1     |
| GF0049794 | 0                            | 0                         | 0                            | 1 Hypothetical protein (1)                         |                                                                                                                                                                                                |                                                                                                                                                                                                                         |                                 |                              | P_trifoliata_06001_mRNA_16.1    |
| GF0049793 | 0                            | 0                         | 0                            | 1 Hypothetical protein (1)                         |                                                                                                                                                                                                |                                                                                                                                                                                                                         |                                 |                              | P_trifoliata_06001_mRNA_14.1    |
| GF0049792 | 0                            | 0                         | 0                            | 1 Cellulose synthase-like protein E6 (1)           | membrane [GO:0016020 cellular_component] (1); cellulose synthase (UDP-forming) activity [GO:0016760 molecular_function] (1); cellulose biosynthetic process [GO:003244 biological_process] (1) | Cellulose synthase [IPRO05150] (1)                                                                                                                                                                                      |                                 |                              | P_trifoliata_06001_mRNA_13.1    |
| GF0049791 | 0                            | 0                         | 0                            | 1 Hypothetical protein (1)                         |                                                                                                                                                                                                |                                                                                                                                                                                                                         |                                 |                              | P_trifoliata_06001_mRNA_12.1    |
| GF0049790 | 0                            | 0                         | 0                            | 1 Hypothetical protein (1)                         |                                                                                                                                                                                                |                                                                                                                                                                                                                         |                                 |                              | P_trifoliata_06000_mRNA_8.1     |
| GF0049789 | 0                            | 0                         | 0                            | 1 Hypothetical protein (1)                         |                                                                                                                                                                                                |                                                                                                                                                                                                                         |                                 |                              | P_trifoliata_06000_mRNA_4.1     |
| GF0049788 | 0                            | 0                         | 0                            | 1 Hypothetical protein (1)                         |                                                                                                                                                                                                |                                                                                                                                                                                                                         |                                 |                              | P_trifoliata_06000_mRNA_3.1     |
| GF0049787 | 0                            | 0                         | 0                            | 1 Hypothetical protein (1)                         | protein binding [GO:0005515 molecular_function] (1)                                                                                                                                            | Cytokinin riboside 5'-monophosphate phosphoribosyltransferase LOG [IPRO05269] (1); UBX domain [IPRO01012] (1); Ubiquitin-related domain [IPRO29071] (1); LOG family [IPRO31100] (1)                                     |                                 |                              | P_trifoliata_06000_mRNA_12.1    |
| GF0049786 | 0                            | 0                         | 0                            | 1 Defensin (1)                                     | defense response [GO:0006952 biological_process] (1)                                                                                                                                           | Kaottin, scorpion toxin-like [IPRO03614] (1); Gamma Purothionin [IPRO08177] (1); Gamma-thionin [IPRO08176] (1)                                                                                                          |                                 |                              | P_trifoliata_06000_mRNA_10.1    |
| GF0049785 | 0                            | 0                         | 0                            | 1 Hypothetical protein (1)                         |                                                                                                                                                                                                |                                                                                                                                                                                                                         |                                 |                              | P_trifoliata_05999_mRNA_9.1     |
| GF0049784 | 0                            | 0                         | 0                            | 1 Hypothetical protein (1)                         |                                                                                                                                                                                                |                                                                                                                                                                                                                         |                                 |                              | P_trifoliata_05999_mRNA_8.1     |
| GF0049783 | 0                            | 0                         | 0                            | 1 Hypothetical protein (1)                         |                                                                                                                                                                                                |                                                                                                                                                                                                                         |                                 |                              | P_trifoliata_05999_mRNA_7.1     |
| GF0049782 | 0                            | 0                         | 0                            | 1 Hypothetical protein (1)                         |                                                                                                                                                                                                |                                                                                                                                                                                                                         |                                 |                              | P_trifoliata_05999_mRNA_6.1     |
| GF0049781 | 0                            | 0                         | 0                            | 1 Hypothetical protein (1)                         |                                                                                                                                                                                                |                                                                                                                                                                                                                         |                                 |                              | P_trifoliata_05999_mRNA_17.1    |
| GF0049780 | 0                            | 0                         | 0                            | 1 Hypothetical protein (1)                         |                                                                                                                                                                                                | Reverse transcriptase domain [IPRO00477] (1)                                                                                                                                                                            |                                 |                              | P_trifoliata_05999_mRNA_14.1    |
| GF0049779 | 0                            | 0                         | 0                            | 1 Hypothetical protein (1)                         |                                                                                                                                                                                                |                                                                                                                                                                                                                         |                                 |                              | P_trifoliata_05999_mRNA_12.1    |
| GF0049778 | 0                            | 0                         | 0                            | 1 Hypothetical protein (1)                         |                                                                                                                                                                                                | DA-1/Plp1 [IPRO02818] (1); Class 1 glutamine amidotransferase-like [IPRO29662] (1)                                                                                                                                      |                                 |                              | P_trifoliata_05999_mRNA_10.1    |
| GF0049777 | 0                            | 0                         | 0                            | 1 Hypothetical protein (1)                         |                                                                                                                                                                                                |                                                                                                                                                                                                                         |                                 |                              | P_trifoliata_05998_mRNA_2.1     |
| GF0049776 | 0                            | 0                         | 0                            | 1 Hypothetical protein (1)                         |                                                                                                                                                                                                | Protein of unknown function DUF761, plant [IPRO04800] (1); Domain of unknown function DUF4408 [IPRO25520] (1)                                                                                                           |                                 |                              | P_trifoliata_05997_mRNA_8.1     |
| GF0049775 | 0                            | 0                         | 0                            | 1 Hypothetical protein (1)                         | DNA damage checkpoint [GO:0000077 biological_process] (1); checkpoint clamp complex [GO:0030896 cellular_component] (1); DNA repair [GO:0006291 biological_process] (1)                        | Checkpoint protein Hus1/Mec3 [IPRO07150] (1)                                                                                                                                                                            |                                 |                              | P_trifoliata_05997_mRNA_6.1     |
| GF0049774 | 0                            | 0                         | 0                            | 1 Disease resistance protein family (1)            | ADP binding [GO:0044531 molecular_function] (1)                                                                                                                                                | NB-ARC [IPRO02182] (1); Leucine-rich repeat domain, L domain-like [IPRO32675] (1)                                                                                                                                       |                                 |                              | P_trifoliata_05997_mRNA_4.1     |
| GF0049773 | 0                            | 0                         | 0                            | 1 Disease resistance RPS5-like protein (1)         | ADP binding [GO:0044531 molecular_function] (1)                                                                                                                                                | NB-ARC [IPRO02182] (1); Leucine-rich repeat domain, L domain-like [IPRO32675] (1)                                                                                                                                       |                                 |                              | P_trifoliata_05997_mRNA_3.1     |
| GF0049772 | 0                            | 0                         | 0                            | 1 HUS1 checkpoint protein (1)                      | checkpoint clamp complex [GO:0030896 cellular_component] (1); DNA damage checkpoint [GO:0000077 biological_process] (1); DNA repair [GO:0006291 biological_process] (1)                        | Checkpoint protein Hus1/Mec3 [IPRO07150] (1)                                                                                                                                                                            |                                 |                              | P_trifoliata_05997_mRNA_2.1     |
| GF0049771 | 0                            | 0                         | 0                            | 1 Hypothetical protein (1)                         |                                                                                                                                                                                                |                                                                                                                                                                                                                         |                                 |                              | P_trifoliata_05997_mRNA_15.1    |
| GF0049770 | 0                            | 0                         | 0                            | 1 Hypothetical protein (1)                         | DNA repair [GO:0006281 biological_process] (1); DNA damage checkpoint [GO:0000077 biological_process] (1); checkpoint clamp complex [GO:0030896 cellular_component] (1)                        | Checkpoint protein Hus1/Mec3 [IPRO07150] (1)                                                                                                                                                                            |                                 |                              | P_trifoliata_05997_mRNA_13.1    |
| GF0049769 | 0                            | 0                         | 0                            | 1 Disease resistance protein RPS2 (1)              | ADP binding [GO:0044531 molecular_function] (1); protein binding [GO:0005515 molecular_function] (1)                                                                                           | Leucine-rich repeat [IPRO01611] (1); NB-ARC [IPRO02182] (1); Leucine-rich repeat domain, L domain-like [IPRO32675] (1)                                                                                                  |                                 |                              | P_trifoliata_05997_mRNA_11.1    |
| GF0049768 | 0                            | 0                         | 0                            | 1 Disease resistance protein family (1)            |                                                                                                                                                                                                | Leucine-rich repeat domain, L domain-like [IPRO32675] (1)                                                                                                                                                               |                                 |                              | P_trifoliata_05997_mRNA_1.1     |
| GF0049767 | 0                            | 0                         | 0                            | 1 Hypothetical protein (1)                         |                                                                                                                                                                                                |                                                                                                                                                                                                                         |                                 |                              | P_trifoliata_05996_mRNA_9.1     |
| GF0049766 | 0                            | 0                         | 0                            | 1 Hypothetical protein (1)                         |                                                                                                                                                                                                |                                                                                                                                                                                                                         |                                 |                              | P_trifoliata_05996_mRNA_7.1     |
| GF0049765 | 0                            | 0                         | 0                            | 1 Hypothetical protein (1)                         |                                                                                                                                                                                                |                                                                                                                                                                                                                         |                                 |                              | P_trifoliata_05996_mRNA_6.1     |
| GF0049764 | 0                            | 0                         | 0                            | 1 Hypothetical protein (1)                         |                                                                                                                                                                                                |                                                                                                                                                                                                                         |                                 |                              | P_trifoliata_05996_mRNA_4.1     |
| GF0049763 | 0                            | 0                         | 0                            | 1 Hypothetical protein (1)                         |                                                                                                                                                                                                |                                                                                                                                                                                                                         |                                 |                              | P_trifoliata_05996_mRNA_10.1    |
| GF0049762 | 0                            | 0                         | 0                            | 1 Putative aspartic protease (1)                   | proteolysis [GO:0006508 biological_process] (1); aspartic-type endopeptidase activity [GO:0004190 molecular_function] (1)                                                                      | Xylanase inhibitor, N-terminal [IPRO32861] (1); Aspartic peptidase A1 family [IPRO01461] (1); Aspartic peptidase domain [IPRO21109] (1); Peptidase family A1 domain [IPRO33121] (1)                                     |                                 |                              | P_trifoliata_05996_mRNA_1.1     |
| GF0049761 | 0                            | 0                         | 0                            | 1 Hypothetical protein (1)                         |                                                                                                                                                                                                |                                                                                                                                                                                                                         |                                 |                              | P_trifoliata_05995_mRNA_8.1     |
| GF0049760 | 0                            | 0                         | 0                            | 1 Hypothetical protein (1)                         |                                                                                                                                                                                                |                                                                                                                                                                                                                         |                                 |                              | P_trifoliata_05995_mRNA_7.1     |
| GF0049759 | 0                            | 0                         | 0                            | 1 Hypothetical protein (1)                         |                                                                                                                                                                                                |                                                                                                                                                                                                                         |                                 |                              | P_trifoliata_05995_mRNA_6.1     |
| GF0049758 | 0                            | 0                         | 0                            | 1 Hypothetical protein (1)                         |                                                                                                                                                                                                |                                                                                                                                                                                                                         |                                 |                              | P_trifoliata_05995_mRNA_4.1     |
| GF0049757 | 0                            | 0                         | 0                            | 1 Hypothetical protein (1)                         |                                                                                                                                                                                                |                                                                                                                                                                                                                         |                                 |                              | P_trifoliata_05995_mRNA_26.1    |
| GF0049756 | 0                            | 0                         | 0                            | 1 Hypothetical protein (1)                         | peptidyl-prolyl cis-trans isomerase activity [GO:0003755 molecular_function] (1); protein folding [GO:0006457 biological_process] (1)                                                          | Cyclophilin-type peptidyl-prolyl cis-trans isomerase [IPRO24936] (1)                                                                                                                                                    |                                 |                              | P_trifoliata_05995_mRNA_23.1    |
| GF0049755 | 0                            | 0                         | 0                            | 1 Hypothetical protein (1)                         | peptidyl-prolyl cis-trans isomerase activity [GO:0003755 molecular_function] (1); protein folding [GO:0006457 biological_process] (1)                                                          | Cyclophilin-like domain [IPRO29000] (1); Cyclophilin-type peptidyl-prolyl cis-trans isomerase [IPRO24936] (1)                                                                                                           |                                 |                              | P_trifoliata_05995_mRNA_22.1    |
| GF0049754 | 0                            | 0                         | 0                            | 1 Hypothetical protein (1)                         |                                                                                                                                                                                                |                                                                                                                                                                                                                         |                                 |                              | P_trifoliata_05995_mRNA_20.1    |
| GF0049753 | 0                            | 0                         | 0                            | 1 Hypothetical protein (1)                         |                                                                                                                                                                                                |                                                                                                                                                                                                                         |                                 |                              | P_trifoliata_05995_mRNA_18.1    |
| GF0049752 | 0                            | 0                         | 0                            | 1 Hypothetical protein (1)                         |                                                                                                                                                                                                |                                                                                                                                                                                                                         |                                 |                              | P_trifoliata_05995_mRNA_16.1    |
| GF0049751 | 0                            | 0                         | 0                            | 1 Hypothetical protein (1)                         |                                                                                                                                                                                                |                                                                                                                                                                                                                         |                                 |                              | P_trifoliata_05995_mRNA_15.1    |
| GF0049750 | 0                            | 0                         | 0                            | 1 Hypothetical protein (1)                         |                                                                                                                                                                                                |                                                                                                                                                                                                                         |                                 |                              | P_trifoliata_05995_mRNA_14.1    |
| GF0049749 | 0                            | 0                         | 0                            | 1 Hypothetical protein (1)                         |                                                                                                                                                                                                |                                                                                                                                                                                                                         |                                 |                              | P_trifoliata_05995_mRNA_13.1    |
| GF0049748 | 0                            | 0                         | 0                            | 1 Hypothetical protein (1)                         |                                                                                                                                                                                                |                                                                                                                                                                                                                         |                                 |                              | P_trifoliata_05995_mRNA_11.1    |
| GF0049747 | 0                            | 0                         | 0                            | 1 Hypothetical protein (1)                         |                                                                                                                                                                                                |                                                                                                                                                                                                                         |                                 |                              | P_trifoliata_05994_mRNA_9.1     |
| GF0049746 | 0                            | 0                         | 0                            | 1 Hypothetical protein (1)                         |                                                                                                                                                                                                |                                                                                                                                                                                                                         |                                 |                              | P_trifoliata_05994_mRNA_6.1     |
| GF0049745 | 0                            | 0                         | 0                            | 1 Hypothetical protein (1)                         |                                                                                                                                                                                                |                                                                                                                                                                                                                         |                                 |                              | P_trifoliata_05994_mRNA_5.1     |
| GF0049744 | 0                            | 0                         | 0                            | 1 Hypothetical protein (1)                         |                                                                                                                                                                                                | Transposase, MdDR, plant [IPRO04332] (1)                                                                                                                                                                                |                                 |                              | P_trifoliata_05994_mRNA_2.1     |
| GF0049743 | 0                            | 0                         | 0                            | 1 Hypothetical protein (1)                         |                                                                                                                                                                                                |                                                                                                                                                                                                                         |                                 |                              | P_trifoliata_05994_mRNA_16.1    |
| GF0049742 | 0                            | 0                         | 0                            | 1 Hypothetical protein (1)                         |                                                                                                                                                                                                |                                                                                                                                                                                                                         |                                 |                              | P_trifoliata_05994_mRNA_15.1    |
| GF0049741 | 0                            | 0                         | 0                            | 1 Hypothetical protein (1)                         |                                                                                                                                                                                                | Leucine-rich repeat domain, L domain-like [IPRO32675] (1)                                                                                                                                                               |                                 |                              | P_trifoliata_05994_mRNA_13.1    |
| GF0049740 | 0                            | 0                         | 0                            | 1 Hypothetical protein (1)                         |                                                                                                                                                                                                | Leucine-rich repeat domain, L domain-like [IPRO32675] (1)                                                                                                                                                               |                                 |                              | P_trifoliata_05994_mRNA_12.1    |
| GF0049739 | 0                            | 0                         | 0                            | 1 Hypothetical protein (1)                         |                                                                                                                                                                                                |                                                                                                                                                                                                                         |                                 |                              | P_trifoliata_05993_mRNA_6.1     |
| GF0049738 | 0                            | 0                         | 0                            | 1 Hypothetical protein (1)                         | magnesium ion binding [GO:0000287 molecular_function] (1)                                                                                                                                      | Subunit, C-terminal [IPRO06885] (1)                                                                                                                                                                                     |                                 |                              | P_trifoliata_05993_mRNA_22.1    |
| GF0049737 | 0                            | 0                         | 0                            | 1 Hypothetical protein (1)                         |                                                                                                                                                                                                |                                                                                                                                                                                                                         |                                 |                              | P_trifoliata_05993_mRNA_2.1     |
| GF0049736 | 0                            | 0                         | 0                            | 1 Hypothetical protein (1)                         |                                                                                                                                                                                                |                                                                                                                                                                                                                         |                                 |                              | P_trifoliata_05993_mRNA_14.1    |
| GF0049735 | 0                            | 0                         | 0                            | 1 Hypothetical protein (1)                         |                                                                                                                                                                                                |                                                                                                                                                                                                                         |                                 |                              | P_trifoliata_05993_mRNA_11.1    |
| GF0049734 | 0                            | 0                         | 0                            | 1 Hypothetical protein (1)                         |                                                                                                                                                                                                |                                                                                                                                                                                                                         |                                 |                              | P_trifoliata_05992_mRNA_17.1    |
| GF0049733 | 0                            | 0                         | 0                            | 1 Hypothetical protein (1)                         |                                                                                                                                                                                                |                                                                                                                                                                                                                         |                                 |                              | P_trifoliata_05992_mRNA_14.1    |
| GF0049732 | 0                            | 0                         | 0                            | 1 Hypothetical protein (1)                         |                                                                                                                                                                                                |                                                                                                                                                                                                                         |                                 |                              | P_trifoliata_05992_mRNA_13.1    |

| ID        | Num. in <i>C. clementiae</i> | Num. in <i>C. canthii</i> | Num. in <i>P. trifoliata</i> | Note                                                             | GO                                                                                                                                                                                                                                                                                                                      | InterPro                                                                                                                                                                                                                                                                                                                                         | Members in <i>C. clementiae</i> | Members in <i>C. canthii</i> | Members in <i>P. trifoliata</i> |
|-----------|------------------------------|---------------------------|------------------------------|------------------------------------------------------------------|-------------------------------------------------------------------------------------------------------------------------------------------------------------------------------------------------------------------------------------------------------------------------------------------------------------------------|--------------------------------------------------------------------------------------------------------------------------------------------------------------------------------------------------------------------------------------------------------------------------------------------------------------------------------------------------|---------------------------------|------------------------------|---------------------------------|
| GF0049731 | 0                            | 0                         | 0                            | 1 Hypothetical protein (1)                                       |                                                                                                                                                                                                                                                                                                                         |                                                                                                                                                                                                                                                                                                                                                  | -                               | -                            | P_trifoliata_00592_mRNA_11.1    |
| GF0049730 | 0                            | 0                         | 0                            | 1 Hypothetical protein (1)                                       |                                                                                                                                                                                                                                                                                                                         |                                                                                                                                                                                                                                                                                                                                                  | -                               | -                            | P_trifoliata_00592_mRNA_10.1    |
| GF0049729 | 0                            | 0                         | 0                            | 1 Hypothetical protein (1)                                       |                                                                                                                                                                                                                                                                                                                         |                                                                                                                                                                                                                                                                                                                                                  | -                               | -                            | P_trifoliata_00592_mRNA_1.1     |
| GF0049728 | 0                            | 0                         | 0                            | 1 Hypothetical protein (1)                                       |                                                                                                                                                                                                                                                                                                                         |                                                                                                                                                                                                                                                                                                                                                  | -                               | -                            | P_trifoliata_00591_mRNA_9.1     |
| GF0049727 | 0                            | 0                         | 0                            | 1 Hypothetical protein (1)                                       |                                                                                                                                                                                                                                                                                                                         |                                                                                                                                                                                                                                                                                                                                                  | -                               | -                            | P_trifoliata_00591_mRNA_6.1     |
| GF0049726 | 0                            | 0                         | 0                            | 1 Hypothetical protein (1)                                       |                                                                                                                                                                                                                                                                                                                         |                                                                                                                                                                                                                                                                                                                                                  | -                               | -                            | P_trifoliata_00591_mRNA_4.1     |
| GF0049725 | 0                            | 0                         | 0                            | 1 Hypothetical protein (1)                                       |                                                                                                                                                                                                                                                                                                                         |                                                                                                                                                                                                                                                                                                                                                  | -                               | -                            | P_trifoliata_00591_mRNA_2.1     |
| GF0049724 | 0                            | 0                         | 0                            | 1 Hypothetical protein (1)                                       |                                                                                                                                                                                                                                                                                                                         |                                                                                                                                                                                                                                                                                                                                                  | -                               | -                            | P_trifoliata_00591_mRNA_13.1    |
| GF0049723 | 0                            | 0                         | 0                            | 1 Hypothetical protein (1)                                       |                                                                                                                                                                                                                                                                                                                         |                                                                                                                                                                                                                                                                                                                                                  | -                               | -                            | P_trifoliata_00590_mRNA_8.1     |
| GF0049722 | 0                            | 0                         | 0                            | 1 Hypothetical protein (1)                                       |                                                                                                                                                                                                                                                                                                                         | Leucine-rich repeat-containing N-terminal, plant-type [IPR013210] (1)                                                                                                                                                                                                                                                                            | -                               | -                            | P_trifoliata_00590_mRNA_6.1     |
| GF0049721 | 0                            | 0                         | 0                            | 1 Hypothetical protein (1)                                       |                                                                                                                                                                                                                                                                                                                         |                                                                                                                                                                                                                                                                                                                                                  | -                               | -                            | P_trifoliata_00590_mRNA_22.1    |
| GF0049720 | 0                            | 0                         | 0                            | 1 NAC domain protein (1)                                         | DNA binding [GO:0003677 molecular_function] (1); regulation of transcription, DNA-templated [GO:0006355 biological_process] (1)                                                                                                                                                                                         | NAC domain [IPR034441] (1)                                                                                                                                                                                                                                                                                                                       | -                               | -                            | P_trifoliata_00590_mRNA_21.1    |
| GF0049719 | 0                            | 0                         | 0                            | 1 Hypothetical protein (1)                                       |                                                                                                                                                                                                                                                                                                                         |                                                                                                                                                                                                                                                                                                                                                  | -                               | -                            | P_trifoliata_00590_mRNA_19.1    |
| GF0049718 | 0                            | 0                         | 0                            | 1 Hypothetical protein (1)                                       | protein binding [GO:0005515 molecular_function] (1)                                                                                                                                                                                                                                                                     | Ankyrin repeat-containing domain [IPR020683] (1); Ankyrin repeat [IPR02110] (1)                                                                                                                                                                                                                                                                  | -                               | -                            | P_trifoliata_00590_mRNA_17.1    |
| GF0049717 | 0                            | 0                         | 0                            | 1 Hypothetical protein (1)                                       |                                                                                                                                                                                                                                                                                                                         | Transmembrane protein 135 [IPR026749] (1)                                                                                                                                                                                                                                                                                                        | -                               | -                            | P_trifoliata_00590_mRNA_16.1    |
| GF0049716 | 0                            | 0                         | 0                            | 1 60S ribosomal protein L6 (1)                                   | ribosome [GO:0005840 cellular_component] (1); structural constituent of ribosome [GO:0003735 molecular_function] (1); translation [GO:0006412 biological_process] (1); intracellular [GO:0005622 cellular_component] (1)                                                                                                | Ribosomal protein L2 domain 2 [IPR014722] (1); 60S ribosomal protein L6E [IPR00915] (1); Ribosomal protein L6, N-terminal [IPR005568] (1); Translation protein S63-like domain [IPR008991] (1)                                                                                                                                                   | -                               | -                            | P_trifoliata_00590_mRNA_11.1    |
| GF0049715 | 0                            | 0                         | 0                            | 1 Hypothetical protein (1)                                       |                                                                                                                                                                                                                                                                                                                         |                                                                                                                                                                                                                                                                                                                                                  | -                               | -                            | P_trifoliata_00590_mRNA_1.1     |
| GF0049714 | 0                            | 0                         | 0                            | 1 Cytochrome P450 (1)                                            | heme binding [GO:0020037 molecular_function] (1); iron ion binding [GO:0005506 molecular_function] (1); oxidoreductase activity, acting on paired donors, with incorporation or reduction of molecular oxygen [GO:0016705 molecular_function] (1); oxidation-reduction process [GO:0055114 biological_process] (1)      | Cytochrome P450 [IPR001128] (1); Cytochrome P450, E-class, group 1 [IPR002401] (1)                                                                                                                                                                                                                                                               | -                               | -                            | P_trifoliata_00589_mRNA_7.1     |
| GF0049713 | 0                            | 0                         | 0                            | 1 Hypothetical protein (1)                                       |                                                                                                                                                                                                                                                                                                                         |                                                                                                                                                                                                                                                                                                                                                  | -                               | -                            | P_trifoliata_00589_mRNA_14.1    |
| GF0049712 | 0                            | 0                         | 0                            | 1 Hypothetical protein (1)                                       |                                                                                                                                                                                                                                                                                                                         |                                                                                                                                                                                                                                                                                                                                                  | -                               | -                            | P_trifoliata_00589_mRNA_10.1    |
| GF0049711 | 0                            | 0                         | 0                            | 1 Putative sodium-dependent transporter yocS (1)                 | membrane [GO:0016020 cellular_component] (1)                                                                                                                                                                                                                                                                            | Bile acid/sodium symporter/arsenical resistance protein_Acr3 [IPR002657] (1)                                                                                                                                                                                                                                                                     | -                               | -                            | P_trifoliata_00588_mRNA_2.1     |
| GF0049710 | 0                            | 0                         | 0                            | 1 Hypothetical protein (1)                                       |                                                                                                                                                                                                                                                                                                                         | Domain of unknown function DUF1117 [IPR010543] (1)                                                                                                                                                                                                                                                                                               | -                               | -                            | P_trifoliata_00588_mRNA_14.1    |
| GF0049709 | 0                            | 0                         | 0                            | 1 Chaperone DnaJ (1)                                             | unfolded protein binding [GO:0051082 molecular_function] (1); heat shock protein binding [GO:0031072 molecular_function] (1)                                                                                                                                                                                            | Heat shock protein DnaJ, cysteine-rich domain [IPR001305] (1)                                                                                                                                                                                                                                                                                    | -                               | -                            | P_trifoliata_00588_mRNA_13.1    |
| GF0049708 | 0                            | 0                         | 0                            | 1 NAD(P)-binding Rossmann-fold superfamily protein isoform 2 (1) |                                                                                                                                                                                                                                                                                                                         | NAD(P)-binding domain [IPR016404] (1)                                                                                                                                                                                                                                                                                                            | -                               | -                            | P_trifoliata_00588_mRNA_1.1     |
| GF0049707 | 0                            | 0                         | 0                            | 1 Hypothetical protein (1)                                       |                                                                                                                                                                                                                                                                                                                         |                                                                                                                                                                                                                                                                                                                                                  | -                               | -                            | P_trifoliata_00587_mRNA_8.1     |
| GF0049706 | 0                            | 0                         | 0                            | 1 Hypothetical protein (1)                                       |                                                                                                                                                                                                                                                                                                                         |                                                                                                                                                                                                                                                                                                                                                  | -                               | -                            | P_trifoliata_00587_mRNA_3.1     |
| GF0049705 | 0                            | 0                         | 0                            | 1 Hypothetical protein (1)                                       |                                                                                                                                                                                                                                                                                                                         | Protein of unknown function DUF247, plant [IPR041581] (1)                                                                                                                                                                                                                                                                                        | -                               | -                            | P_trifoliata_00587_mRNA_18.1    |
| GF0049704 | 0                            | 0                         | 0                            | 1 Hypothetical protein (1)                                       |                                                                                                                                                                                                                                                                                                                         |                                                                                                                                                                                                                                                                                                                                                  | -                               | -                            | P_trifoliata_00586_mRNA_9.1     |
| GF0049703 | 0                            | 0                         | 0                            | 1 Hypothetical protein (1)                                       | catalytic activity [GO:0003824 molecular_function] (1)                                                                                                                                                                                                                                                                  | Pyridoxal phosphate-dependent transferase, major region, subdomain 2 [IPR015423] (1)                                                                                                                                                                                                                                                             | -                               | -                            | P_trifoliata_00586_mRNA_8.1     |
| GF0049702 | 0                            | 0                         | 0                            | 1 Tyrosine transaminase (1)                                      | cellular amino acid metabolic process [GO:0006520 biological_process] (1); catalytic activity [GO:0003824 molecular_function] (1); biosynthetic process [GO:0009058 biological_process] (1); transaminase activity [GO:0008043 molecular_function] (1); pyridoxal phosphate binding [GO:0030170 molecular_function] (1) | Pyridoxal phosphate-dependent transferase, major region, subdomain 1 [IPR015421] (1); Aminotransferase, class I class I [IPR048399] (1); Pyridoxal phosphate-dependent transferase, major region, subdomain 2 [IPR015422] (1); Tyrosine/nicotinamide aminotransferase [IPR005958] (1); Pyridoxal phosphate-dependent transferase [IPR015424] (1) | -                               | -                            | P_trifoliata_00586_mRNA_7.1     |
| GF0049701 | 0                            | 0                         | 0                            | 1 Hypothetical protein (1)                                       |                                                                                                                                                                                                                                                                                                                         |                                                                                                                                                                                                                                                                                                                                                  | -                               | -                            | P_trifoliata_00586_mRNA_5.1     |
| GF0049700 | 0                            | 0                         | 0                            | 1 Hypothetical protein (1)                                       |                                                                                                                                                                                                                                                                                                                         |                                                                                                                                                                                                                                                                                                                                                  | -                               | -                            | P_trifoliata_00586_mRNA_3.1     |
| GF0049699 | 0                            | 0                         | 0                            | 1 Hypothetical protein (1)                                       |                                                                                                                                                                                                                                                                                                                         |                                                                                                                                                                                                                                                                                                                                                  | -                               | -                            | P_trifoliata_00586_mRNA_20.1    |
| GF0049698 | 0                            | 0                         | 0                            | 1 Hypothetical protein (1)                                       |                                                                                                                                                                                                                                                                                                                         |                                                                                                                                                                                                                                                                                                                                                  | -                               | -                            | P_trifoliata_00586_mRNA_2.1     |
| GF0049697 | 0                            | 0                         | 0                            | 1 Hypothetical protein (1)                                       |                                                                                                                                                                                                                                                                                                                         |                                                                                                                                                                                                                                                                                                                                                  | -                               | -                            | P_trifoliata_00586_mRNA_19.1    |
| GF0049696 | 0                            | 0                         | 0                            | 1 Hypothetical protein (1)                                       |                                                                                                                                                                                                                                                                                                                         |                                                                                                                                                                                                                                                                                                                                                  | -                               | -                            | P_trifoliata_00586_mRNA_18.1    |
| GF0049695 | 0                            | 0                         | 0                            | 1 Hypothetical protein (1)                                       |                                                                                                                                                                                                                                                                                                                         |                                                                                                                                                                                                                                                                                                                                                  | -                               | -                            | P_trifoliata_00586_mRNA_17.1    |
| GF0049694 | 0                            | 0                         | 0                            | 1 Hypothetical protein (1)                                       |                                                                                                                                                                                                                                                                                                                         |                                                                                                                                                                                                                                                                                                                                                  | -                               | -                            | P_trifoliata_00586_mRNA_16.1    |
| GF0049693 | 0                            | 0                         | 0                            | 1 Hypothetical protein (1)                                       | protein binding [GO:0005515 molecular_function] (1); signal transduction [GO:0007165 biological_process] (1)                                                                                                                                                                                                            | Leucine-rich repeat domain, L domain-like [IPR02675] (1); Toll/interferon-1 receptor homology (TIR) domain [IPR001057] (1); Leucine-rich repeat 3 [IPR011713] (1)                                                                                                                                                                                | -                               | -                            | P_trifoliata_00586_mRNA_15.1    |
| GF0049692 | 0                            | 0                         | 0                            | 1 Hypothetical protein (1)                                       | zinc ion binding [GO:0008270 molecular_function] (1); nucleic acid binding [GO:0003676 molecular_function] (1)                                                                                                                                                                                                          | Zinc finger, CCHC-type [IPR001878] (1)                                                                                                                                                                                                                                                                                                           | -                               | -                            | P_trifoliata_00586_mRNA_14.1    |
| GF0049691 | 0                            | 0                         | 0                            | 1 Hypothetical protein (1)                                       |                                                                                                                                                                                                                                                                                                                         |                                                                                                                                                                                                                                                                                                                                                  | -                               | -                            | P_trifoliata_00586_mRNA_13.1    |
| GF0049690 | 0                            | 0                         | 0                            | 1 Hypothetical protein (1)                                       |                                                                                                                                                                                                                                                                                                                         |                                                                                                                                                                                                                                                                                                                                                  | -                               | -                            | P_trifoliata_00585_mRNA_4.1     |
| GF0049689 | 0                            | 0                         | 0                            | 1 Hypothetical protein (1)                                       |                                                                                                                                                                                                                                                                                                                         | Terpenoid cyclases/protein prenyltransferase alpha-alpha toroid [IPR008930] (1)                                                                                                                                                                                                                                                                  | -                               | -                            | P_trifoliata_00585_mRNA_2.1     |
| GF0049688 | 0                            | 0                         | 0                            | 1 Hypothetical protein (1)                                       |                                                                                                                                                                                                                                                                                                                         |                                                                                                                                                                                                                                                                                                                                                  | -                               | -                            | P_trifoliata_00585_mRNA_13.1    |
| GF0049687 | 0                            | 0                         | 0                            | 1 Hypothetical protein (1)                                       |                                                                                                                                                                                                                                                                                                                         |                                                                                                                                                                                                                                                                                                                                                  | -                               | -                            | P_trifoliata_00585_mRNA_12.1    |
| GF0049686 | 0                            | 0                         | 0                            | 1 Hypothetical protein (1)                                       |                                                                                                                                                                                                                                                                                                                         | Reverse transcriptase zinc-binding domain [IPR026960] (1)                                                                                                                                                                                                                                                                                        | -                               | -                            | P_trifoliata_00585_mRNA_1.1     |
| GF0049685 | 0                            | 0                         | 0                            | 1 Hypothetical protein (1)                                       |                                                                                                                                                                                                                                                                                                                         |                                                                                                                                                                                                                                                                                                                                                  | -                               | -                            | P_trifoliata_00584_mRNA_4.1     |
| GF0049684 | 0                            | 0                         | 0                            | 1 Hypothetical protein (1)                                       |                                                                                                                                                                                                                                                                                                                         | Viral movement protein [IPR028919] (1)                                                                                                                                                                                                                                                                                                           | -                               | -                            | P_trifoliata_00584_mRNA_2.1     |
| GF0049683 | 0                            | 0                         | 0                            | 1 Hypothetical protein (1)                                       |                                                                                                                                                                                                                                                                                                                         |                                                                                                                                                                                                                                                                                                                                                  | -                               | -                            | P_trifoliata_00583_mRNA_9.1     |
| GF0049682 | 0                            | 0                         | 0                            | 1 Hypothetical protein (1)                                       |                                                                                                                                                                                                                                                                                                                         |                                                                                                                                                                                                                                                                                                                                                  | -                               | -                            | P_trifoliata_00583_mRNA_8.1     |
| GF0049681 | 0                            | 0                         | 0                            | 1 Hypothetical protein (1)                                       |                                                                                                                                                                                                                                                                                                                         |                                                                                                                                                                                                                                                                                                                                                  | -                               | -                            | P_trifoliata_00583_mRNA_6.1     |
| GF0049680 | 0                            | 0                         | 0                            | 1 Hypothetical protein (1)                                       | proteolysis [GO:0006508 biological_process] (1); cysteine-type peptidase activity [GO:0008234 molecular_function] (1)                                                                                                                                                                                                   | Upl1 protease family, C-terminal catalytic domain [IPR003653] (1)                                                                                                                                                                                                                                                                                | -                               | -                            | P_trifoliata_00583_mRNA_16.1    |
| GF0049679 | 0                            | 0                         | 0                            | 1 Hypothetical protein (1)                                       |                                                                                                                                                                                                                                                                                                                         |                                                                                                                                                                                                                                                                                                                                                  | -                               | -                            | P_trifoliata_00583_mRNA_11.1    |
| GF0049678 | 0                            | 0                         | 0                            | 1 Hypothetical protein (1)                                       |                                                                                                                                                                                                                                                                                                                         |                                                                                                                                                                                                                                                                                                                                                  | -                               | -                            | P_trifoliata_00582_mRNA_8.1     |
| GF0049677 | 0                            | 0                         | 0                            | 1 Hypothetical protein (1)                                       |                                                                                                                                                                                                                                                                                                                         |                                                                                                                                                                                                                                                                                                                                                  | -                               | -                            | P_trifoliata_00582_mRNA_7.1     |
| GF0049676 | 0                            | 0                         | 0                            | 1 Hypothetical protein (1)                                       |                                                                                                                                                                                                                                                                                                                         |                                                                                                                                                                                                                                                                                                                                                  | -                               | -                            | P_trifoliata_00582_mRNA_10.1    |
| GF0049675 | 0                            | 0                         | 0                            | 1 Hypothetical protein (1)                                       |                                                                                                                                                                                                                                                                                                                         |                                                                                                                                                                                                                                                                                                                                                  | -                               | -                            | P_trifoliata_00582_mRNA_1.1     |
| GF0049674 | 0                            | 0                         | 0                            | 1 Voltage-gated potassium channel beta subunit (1)               |                                                                                                                                                                                                                                                                                                                         | NADP-dependent oxidoreductase domain [IPR025210] (1); Aldoketo reductase/potassium channel subunit beta [IPR001395] (1)                                                                                                                                                                                                                          | -                               | -                            | P_trifoliata_00581_mRNA_8.1     |
| GF0049673 | 0                            | 0                         | 0                            | 1 Hypothetical protein (1)                                       |                                                                                                                                                                                                                                                                                                                         |                                                                                                                                                                                                                                                                                                                                                  | -                               | -                            | P_trifoliata_00581_mRNA_17.1    |
| GF0049672 | 0                            | 0                         | 0                            | 1 Hypothetical protein (1)                                       |                                                                                                                                                                                                                                                                                                                         | Reverse transcriptase domain [IPR000477] (1)                                                                                                                                                                                                                                                                                                     | -                               | -                            | P_trifoliata_00581_mRNA_16.1    |
| GF0049671 | 0                            | 0                         | 0                            | 1 Hypothetical protein (1)                                       |                                                                                                                                                                                                                                                                                                                         |                                                                                                                                                                                                                                                                                                                                                  | -                               | -                            | P_trifoliata_00581_mRNA_14.1    |
| GF0049670 | 0                            | 0                         | 0                            | 1 Hypothetical protein (1)                                       |                                                                                                                                                                                                                                                                                                                         |                                                                                                                                                                                                                                                                                                                                                  | -                               | -                            | P_trifoliata_00580_mRNA_4.1     |
| GF0049669 | 0                            | 0                         | 0                            | 1 Hypothetical protein (1)                                       |                                                                                                                                                                                                                                                                                                                         |                                                                                                                                                                                                                                                                                                                                                  | -                               | -                            | P_trifoliata_00580_mRNA_20.1    |
| GF0049668 | 0                            | 0                         | 0                            | 1 Hypothetical protein (1)                                       |                                                                                                                                                                                                                                                                                                                         | MULE transposase domain [IPR018289] (1)                                                                                                                                                                                                                                                                                                          | -                               | -                            | P_trifoliata_00580_mRNA_19.1    |
| GF0049667 | 0                            | 0                         | 0                            | 1 Cytokinin riboside 5'-monophosphate phosphoribohydrolase (1)   |                                                                                                                                                                                                                                                                                                                         | LOG family [IPR031100] (1)                                                                                                                                                                                                                                                                                                                       | -                               | -                            | P_trifoliata_00580_mRNA_18.1    |
| GF0049666 | 0                            | 0                         | 0                            | 1 Hypothetical protein (1)                                       |                                                                                                                                                                                                                                                                                                                         |                                                                                                                                                                                                                                                                                                                                                  | -                               | -                            | P_trifoliata_00580_mRNA_17.1    |
| GF0049665 | 0                            | 0                         | 0                            | 1 Hypothetical protein (1)                                       |                                                                                                                                                                                                                                                                                                                         |                                                                                                                                                                                                                                                                                                                                                  | -                               | -                            | P_trifoliata_00580_mRNA_16.1    |
| GF0049664 | 0                            | 0                         | 0                            | 1 Hypothetical protein (1)                                       |                                                                                                                                                                                                                                                                                                                         |                                                                                                                                                                                                                                                                                                                                                  | -                               | -                            | P_trifoliata_00580_mRNA_13.1    |
| GF0049663 | 0                            | 0                         | 0                            | 1 Hypothetical protein (1)                                       |                                                                                                                                                                                                                                                                                                                         |                                                                                                                                                                                                                                                                                                                                                  | -                               | -                            | P_trifoliata_00580_mRNA_11.1    |
| GF0049662 | 0                            | 0                         | 0                            | 1 Hypothetical protein (1)                                       |                                                                                                                                                                                                                                                                                                                         |                                                                                                                                                                                                                                                                                                                                                  | -                               | -                            | P_trifoliata_00580_mRNA_10.1    |
| GF0049661 | 0                            | 0                         | 0                            | 1 Hypothetical protein (1)                                       |                                                                                                                                                                                                                                                                                                                         |                                                                                                                                                                                                                                                                                                                                                  | -                               | -                            | P_trifoliata_00579_mRNA_6.1     |
| GF0049660 | 0                            | 0                         | 0                            | 1 Hypothetical protein (1)                                       |                                                                                                                                                                                                                                                                                                                         |                                                                                                                                                                                                                                                                                                                                                  | -                               | -                            | P_trifoliata_00579_mRNA_5.1     |
| GF0049659 | 0                            | 0                         | 0                            | 1 Hypothetical protein (1)                                       | protein kinase activity [GO:0004672 molecular_function] (1); protein phosphorylation [GO:0006468 biological_process] (1); ATP binding [GO:0005524 molecular_function] (1)                                                                                                                                               | Serine/threonine/dual specificity protein kinase, catalytic domain [IPR002290] (1); Protein kinase-like domain [IPR011009] (1); Protein kinase domain [IPR000709] (1)                                                                                                                                                                            | -                               | -                            | P_trifoliata_00579_mRNA_3.1     |
| GF0049658 | 0                            | 0                         | 0                            | 1 Hypothetical protein (1)                                       |                                                                                                                                                                                                                                                                                                                         | Protein kinase-like domain [IPR011009] (1)                                                                                                                                                                                                                                                                                                       | -                               | -                            | P_trifoliata_00579_mRNA_2.1     |
| GF0049657 | 0                            | 0                         | 0                            | 1 Hypothetical protein (1)                                       |                                                                                                                                                                                                                                                                                                                         |                                                                                                                                                                                                                                                                                                                                                  | -                               | -                            | P_trifoliata_00579_mRNA_11.1    |
| GF0049656 | 0                            | 0                         | 0                            | 1 UGT protein (1)                                                | metabolic process [GO:0008152 biological_process] (1); transferase activity, transferring hexosyl groups [GO:0016758 molecular_function] (1)                                                                                                                                                                            | UDP-glucuronosyl/UDP-glucosyltransferase [IPR002213] (1)                                                                                                                                                                                                                                                                                         | -                               | -                            | P_trifoliata_00579_mRNA_10.1    |
| GF0049655 | 0                            | 0                         | 0                            | 1 Hypothetical protein (1)                                       |                                                                                                                                                                                                                                                                                                                         |                                                                                                                                                                                                                                                                                                                                                  | -                               | -                            | P_trifoliata_00579_mRNA_1.1     |

| ID        | Num. in <i>C. clementiae</i> | Num. in <i>C. unshii</i> | Num. in <i>P. trifoliata</i> | Note                                                        | GO                                                                                                                                                                                                                                                                                                                                                                                                                                                                                                                     | InterPro                                                                                                                                                                                                                                                                                                                                                         | Members in <i>C. clementiae</i> | Members in <i>C. unshii</i> | Members in <i>P. trifoliata</i> |
|-----------|------------------------------|--------------------------|------------------------------|-------------------------------------------------------------|------------------------------------------------------------------------------------------------------------------------------------------------------------------------------------------------------------------------------------------------------------------------------------------------------------------------------------------------------------------------------------------------------------------------------------------------------------------------------------------------------------------------|------------------------------------------------------------------------------------------------------------------------------------------------------------------------------------------------------------------------------------------------------------------------------------------------------------------------------------------------------------------|---------------------------------|-----------------------------|---------------------------------|
| GF0049654 | 0                            | 0                        | 1                            | Hypothetical protein (1)                                    |                                                                                                                                                                                                                                                                                                                                                                                                                                                                                                                        | Domain of unknown function DUF4283 [IPR025558] (1)                                                                                                                                                                                                                                                                                                               | -                               | -                           | P_trifoliata_00578_mRNA_8,1     |
| GF0049653 | 0                            | 0                        | 1                            | Hypothetical protein (1)                                    |                                                                                                                                                                                                                                                                                                                                                                                                                                                                                                                        |                                                                                                                                                                                                                                                                                                                                                                  | -                               | -                           | P_trifoliata_00578_mRNA_4,1     |
| GF0049652 | 0                            | 0                        | 1                            | Hypothetical protein (1)                                    |                                                                                                                                                                                                                                                                                                                                                                                                                                                                                                                        | Pentatricopeptide repeat [IPR020885] (1)                                                                                                                                                                                                                                                                                                                         | -                               | -                           | P_trifoliata_00578_mRNA_14,1    |
| GF0049651 | 0                            | 0                        | 1                            | Hypothetical protein (1)                                    |                                                                                                                                                                                                                                                                                                                                                                                                                                                                                                                        | Alpha/Beta hydrolase fold [IPR029058] (1)                                                                                                                                                                                                                                                                                                                        | -                               | -                           | P_trifoliata_00578_mRNA_10,1    |
| GF0049650 | 0                            | 0                        | 1                            | Probable pectinesterase 49 (1)                              | cell wall modification [GO:0042545 biological_process] (1); cell wall [GO:0005618 cellular_component] (1); pectinesterase activity [GO:00030599 molecular_function] (1)                                                                                                                                                                                                                                                                                                                                                | Pectinesterase, catalytic [IPR000070] (1); Pectin lyase fold [IPR012334] (1); Pectin lyase fold/virulence factor [IPR011050] (1)                                                                                                                                                                                                                                 | -                               | -                           | P_trifoliata_00578_mRNA_1,1     |
| GF0049649 | 0                            | 0                        | 1                            | Hypothetical protein (1)                                    |                                                                                                                                                                                                                                                                                                                                                                                                                                                                                                                        |                                                                                                                                                                                                                                                                                                                                                                  | -                               | -                           | P_trifoliata_00577_mRNA_26,1    |
| GF0049648 | 0                            | 0                        | 1                            | Hypothetical protein (1)                                    |                                                                                                                                                                                                                                                                                                                                                                                                                                                                                                                        |                                                                                                                                                                                                                                                                                                                                                                  | -                               | -                           | P_trifoliata_00577_mRNA_25,1    |
| GF0049647 | 0                            | 0                        | 1                            | Hypothetical protein (1)                                    |                                                                                                                                                                                                                                                                                                                                                                                                                                                                                                                        | Reverse transcriptase, RNA-dependent DNA polymerase [IPR013103] (1)                                                                                                                                                                                                                                                                                              | -                               | -                           | P_trifoliata_00577_mRNA_24,1    |
| GF0049646 | 0                            | 0                        | 1                            | Hypothetical protein (1)                                    |                                                                                                                                                                                                                                                                                                                                                                                                                                                                                                                        |                                                                                                                                                                                                                                                                                                                                                                  | -                               | -                           | P_trifoliata_00577_mRNA_23,1    |
| GF0049645 | 0                            | 0                        | 1                            | Hypothetical protein (1)                                    |                                                                                                                                                                                                                                                                                                                                                                                                                                                                                                                        |                                                                                                                                                                                                                                                                                                                                                                  | -                               | -                           | P_trifoliata_00577_mRNA_22,1    |
| GF0049644 | 0                            | 0                        | 1                            | Hypothetical protein (1)                                    | DNA binding [GO:0003677 molecular_function] (1)                                                                                                                                                                                                                                                                                                                                                                                                                                                                        | Homeodomain-like [IPR009057] (1)                                                                                                                                                                                                                                                                                                                                 | -                               | -                           | P_trifoliata_00577_mRNA_12,1    |
| GF0049643 | 0                            | 0                        | 1                            | Hypothetical protein (1)                                    |                                                                                                                                                                                                                                                                                                                                                                                                                                                                                                                        |                                                                                                                                                                                                                                                                                                                                                                  | -                               | -                           | P_trifoliata_00577_mRNA_1,1     |
| GF0049642 | 0                            | 0                        | 1                            | Hypothetical protein (1)                                    |                                                                                                                                                                                                                                                                                                                                                                                                                                                                                                                        |                                                                                                                                                                                                                                                                                                                                                                  | -                               | -                           | P_trifoliata_00576_mRNA_7,1     |
| GF0049641 | 0                            | 0                        | 1                            | Hypothetical protein (1)                                    |                                                                                                                                                                                                                                                                                                                                                                                                                                                                                                                        |                                                                                                                                                                                                                                                                                                                                                                  | -                               | -                           | P_trifoliata_00576_mRNA_4,1     |
| GF0049640 | 0                            | 0                        | 1                            | Hypothetical protein (1)                                    |                                                                                                                                                                                                                                                                                                                                                                                                                                                                                                                        |                                                                                                                                                                                                                                                                                                                                                                  | -                               | -                           | P_trifoliata_00576_mRNA_14,1    |
| GF0049639 | 0                            | 0                        | 1                            | Hypothetical protein (1)                                    |                                                                                                                                                                                                                                                                                                                                                                                                                                                                                                                        | Domain of unknown function DUF4219 [IPR025314] (1)                                                                                                                                                                                                                                                                                                               | -                               | -                           | P_trifoliata_00576_mRNA_13,1    |
| GF0049638 | 0                            | 0                        | 1                            | Hypothetical protein (1)                                    |                                                                                                                                                                                                                                                                                                                                                                                                                                                                                                                        |                                                                                                                                                                                                                                                                                                                                                                  | -                               | -                           | P_trifoliata_00575_mRNA_8,1     |
| GF0049637 | 0                            | 0                        | 1                            | Hypothetical protein (1)                                    | integral component of membrane [GO:0016021 cellular_component] (1); heme binding [GO:0020037 molecular_function] (1); iron ion binding [GO:0005506 molecular_function] (1); electron carrier activity [GO:0000965 molecular_function] (1); cytochrome oxidase activity [GO:0004129 molecular_function] (1); aerobic respiration [GO:0000960 biological_process] (1); oxidation-reduction process [GO:0055114 biological_process] (1)                                                                                   | Cytochrome c oxidase subunit I [IPR008853] (1); Cytochrome c oxidase, subunit I domain [IPR023616] (1)                                                                                                                                                                                                                                                           | -                               | -                           | P_trifoliata_00575_mRNA_7,1     |
| GF0049636 | 0                            | 0                        | 1                            | Hypothetical protein (1)                                    |                                                                                                                                                                                                                                                                                                                                                                                                                                                                                                                        |                                                                                                                                                                                                                                                                                                                                                                  | -                               | -                           | P_trifoliata_00575_mRNA_6,1     |
| GF0049635 | 0                            | 0                        | 1                            | Hypothetical protein (1)                                    |                                                                                                                                                                                                                                                                                                                                                                                                                                                                                                                        |                                                                                                                                                                                                                                                                                                                                                                  | -                               | -                           | P_trifoliata_00575_mRNA_5,1     |
| GF0049634 | 0                            | 0                        | 1                            | Hypothetical protein (1)                                    |                                                                                                                                                                                                                                                                                                                                                                                                                                                                                                                        |                                                                                                                                                                                                                                                                                                                                                                  | -                               | -                           | P_trifoliata_00575_mRNA_20,1    |
| GF0049633 | 0                            | 0                        | 1                            | Hypothetical protein (1)                                    |                                                                                                                                                                                                                                                                                                                                                                                                                                                                                                                        |                                                                                                                                                                                                                                                                                                                                                                  | -                               | -                           | P_trifoliata_00575_mRNA_18,1    |
| GF0049632 | 0                            | 0                        | 1                            | Hypothetical protein (1)                                    |                                                                                                                                                                                                                                                                                                                                                                                                                                                                                                                        |                                                                                                                                                                                                                                                                                                                                                                  | -                               | -                           | P_trifoliata_00575_mRNA_15,1    |
| GF0049631 | 0                            | 0                        | 1                            | Hypothetical protein (1)                                    |                                                                                                                                                                                                                                                                                                                                                                                                                                                                                                                        |                                                                                                                                                                                                                                                                                                                                                                  | -                               | -                           | P_trifoliata_00575_mRNA_14,1    |
| GF0049630 | 0                            | 0                        | 1                            | Hypothetical protein (1)                                    |                                                                                                                                                                                                                                                                                                                                                                                                                                                                                                                        |                                                                                                                                                                                                                                                                                                                                                                  | -                               | -                           | P_trifoliata_00575_mRNA_1,1     |
| GF0049629 | 0                            | 0                        | 1                            | 50S ribosomal protein L18, chloroplast (1)                  | structural constituent of ribosome [GO:0007375 molecular_function] (1); translation [GO:0006412 biological_process] (1); intracellular [GO:0005622 cellular_component] (1); ribosome [GO:0005840 cellular_component] (1)                                                                                                                                                                                                                                                                                               | Ribosomal protein L18, bacterial-type [IPR004389] (1); Ribosomal protein L18.L5 [IPR005484] (1)                                                                                                                                                                                                                                                                  | -                               | -                           | P_trifoliata_00574_mRNA_8,1     |
| GF0049628 | 0                            | 0                        | 1                            | Hypothetical protein (1)                                    |                                                                                                                                                                                                                                                                                                                                                                                                                                                                                                                        |                                                                                                                                                                                                                                                                                                                                                                  | -                               | -                           | P_trifoliata_00574_mRNA_4,1     |
| GF0049627 | 0                            | 0                        | 1                            | NAC domain-containing protein 7 (1)                         | regulation of transcription, DNA-templated [GO:0006355 biological_process] (1); DNA binding [GO:0003677 molecular_function] (1)                                                                                                                                                                                                                                                                                                                                                                                        | NAC domain [IPR003441] (1)                                                                                                                                                                                                                                                                                                                                       | -                               | -                           | P_trifoliata_00574_mRNA_13,1    |
| GF0049626 | 0                            | 0                        | 1                            | Hypothetical protein (1)                                    |                                                                                                                                                                                                                                                                                                                                                                                                                                                                                                                        |                                                                                                                                                                                                                                                                                                                                                                  | -                               | -                           | P_trifoliata_00574_mRNA_12,1    |
| GF0049625 | 0                            | 0                        | 1                            | Hypothetical protein (1)                                    |                                                                                                                                                                                                                                                                                                                                                                                                                                                                                                                        |                                                                                                                                                                                                                                                                                                                                                                  | -                               | -                           | P_trifoliata_00574_mRNA_11,1    |
| GF0049624 | 0                            | 0                        | 1                            | Hypothetical protein (1)                                    |                                                                                                                                                                                                                                                                                                                                                                                                                                                                                                                        |                                                                                                                                                                                                                                                                                                                                                                  | -                               | -                           | P_trifoliata_00573_mRNA_9,1     |
| GF0049623 | 0                            | 0                        | 1                            | Hypothetical protein (1)                                    |                                                                                                                                                                                                                                                                                                                                                                                                                                                                                                                        |                                                                                                                                                                                                                                                                                                                                                                  | -                               | -                           | P_trifoliata_00573_mRNA_2,1     |
| GF0049622 | 0                            | 0                        | 1                            | Hypothetical protein (1)                                    | Positive RNA-directed DNA polymerase (1)                                                                                                                                                                                                                                                                                                                                                                                                                                                                               |                                                                                                                                                                                                                                                                                                                                                                  | -                               | -                           | P_trifoliata_00573_mRNA_16,1    |
| GF0049621 | 0                            | 0                        | 1                            | Hypothetical protein (1)                                    |                                                                                                                                                                                                                                                                                                                                                                                                                                                                                                                        |                                                                                                                                                                                                                                                                                                                                                                  | -                               | -                           | P_trifoliata_00573_mRNA_13,1    |
| GF0049620 | 0                            | 0                        | 1                            | Hypothetical protein (1)                                    |                                                                                                                                                                                                                                                                                                                                                                                                                                                                                                                        |                                                                                                                                                                                                                                                                                                                                                                  | -                               | -                           | P_trifoliata_00572_mRNA_9,1     |
| GF0049619 | 0                            | 0                        | 1                            | Hypothetical protein (1)                                    |                                                                                                                                                                                                                                                                                                                                                                                                                                                                                                                        |                                                                                                                                                                                                                                                                                                                                                                  | -                               | -                           | P_trifoliata_00572_mRNA_8,1     |
| GF0049618 | 0                            | 0                        | 1                            | Hypothetical protein (1)                                    |                                                                                                                                                                                                                                                                                                                                                                                                                                                                                                                        |                                                                                                                                                                                                                                                                                                                                                                  | -                               | -                           | P_trifoliata_00572_mRNA_6,1     |
| GF0049617 | 0                            | 0                        | 1                            | Hypothetical protein (1)                                    |                                                                                                                                                                                                                                                                                                                                                                                                                                                                                                                        |                                                                                                                                                                                                                                                                                                                                                                  | -                               | -                           | P_trifoliata_00572_mRNA_3,1     |
| GF0049616 | 0                            | 0                        | 1                            | Hexaprenylidiphosphate methyltransferase, mitochondrial (1) | 2-polypropyl-6-methoxy-1,4-benzoquinone methyltransferase activity [GO:0008425 molecular_function] (1); translation [GO:0006412 biological_process] (1); ubiquinone biosynthetic process [GO:0006744 biological_process] (1)                                                                                                                                                                                                                                                                                           | Ubiquinone biosynthesis O-methyltransferase [IPR010233] (1); S-adenosyl-L-methionine-dependent methyltransferase [IPR029063] (1)                                                                                                                                                                                                                                 | -                               | -                           | P_trifoliata_00571_mRNA_6,1     |
| GF0049615 | 0                            | 0                        | 1                            | Hypothetical protein (1)                                    |                                                                                                                                                                                                                                                                                                                                                                                                                                                                                                                        |                                                                                                                                                                                                                                                                                                                                                                  | -                               | -                           | P_trifoliata_00570_mRNA_7,1     |
| GF0049614 | 0                            | 0                        | 1                            | Hypothetical protein (1)                                    |                                                                                                                                                                                                                                                                                                                                                                                                                                                                                                                        |                                                                                                                                                                                                                                                                                                                                                                  | -                               | -                           | P_trifoliata_00570_mRNA_5,1     |
| GF0049613 | 0                            | 0                        | 1                            | Hypothetical protein (1)                                    |                                                                                                                                                                                                                                                                                                                                                                                                                                                                                                                        |                                                                                                                                                                                                                                                                                                                                                                  | -                               | -                           | P_trifoliata_00570_mRNA_3,1     |
| GF0049612 | 0                            | 0                        | 1                            | Hypothetical protein (1)                                    |                                                                                                                                                                                                                                                                                                                                                                                                                                                                                                                        |                                                                                                                                                                                                                                                                                                                                                                  | -                               | -                           | P_trifoliata_00570_mRNA_17,1    |
| GF0049611 | 0                            | 0                        | 1                            | Hypothetical protein (1)                                    |                                                                                                                                                                                                                                                                                                                                                                                                                                                                                                                        |                                                                                                                                                                                                                                                                                                                                                                  | -                               | -                           | P_trifoliata_00570_mRNA_16,1    |
| GF0049610 | 0                            | 0                        | 1                            | Hypothetical protein (1)                                    |                                                                                                                                                                                                                                                                                                                                                                                                                                                                                                                        | Transposase, MuDR, plant [IPR004332] (1)                                                                                                                                                                                                                                                                                                                         | -                               | -                           | P_trifoliata_00570_mRNA_1,1     |
| GF0049609 | 0                            | 0                        | 1                            | Hypothetical protein (1)                                    | regulation of transcription, DNA-templated [GO:0006355 biological_process] (1)                                                                                                                                                                                                                                                                                                                                                                                                                                         | FHY3/FAR1 family [IPR031052] (1)                                                                                                                                                                                                                                                                                                                                 | -                               | -                           | P_trifoliata_00569_mRNA_5,1     |
| GF0049608 | 0                            | 0                        | 1                            | Hypothetical protein (1)                                    |                                                                                                                                                                                                                                                                                                                                                                                                                                                                                                                        | Lysosomal cystine transporter [IPR005282] (1)                                                                                                                                                                                                                                                                                                                    | -                               | -                           | P_trifoliata_00569_mRNA_3,1     |
| GF0049607 | 0                            | 0                        | 1                            | Hypothetical protein (1)                                    |                                                                                                                                                                                                                                                                                                                                                                                                                                                                                                                        |                                                                                                                                                                                                                                                                                                                                                                  | -                               | -                           | P_trifoliata_00569_mRNA_18,1    |
| GF0049606 | 0                            | 0                        | 1                            | Hypothetical protein (1)                                    | zinc ion binding [GO:0008270 molecular_function] (1)                                                                                                                                                                                                                                                                                                                                                                                                                                                                   | Zinc finger, PMZ-type [IPR006564] (1); Zinc finger, SWIM-type [IPR007527] (1)                                                                                                                                                                                                                                                                                    | -                               | -                           | P_trifoliata_00569_mRNA_14,1    |
| GF0049605 | 0                            | 0                        | 1                            | Hypothetical protein (1)                                    |                                                                                                                                                                                                                                                                                                                                                                                                                                                                                                                        |                                                                                                                                                                                                                                                                                                                                                                  | -                               | -                           | P_trifoliata_00568_mRNA_5,1     |
| GF0049604 | 0                            | 0                        | 1                            | Hypothetical protein (1)                                    |                                                                                                                                                                                                                                                                                                                                                                                                                                                                                                                        |                                                                                                                                                                                                                                                                                                                                                                  | -                               | -                           | P_trifoliata_00568_mRNA_16,1    |
| GF0049603 | 0                            | 0                        | 1                            | Hypothetical protein (1)                                    |                                                                                                                                                                                                                                                                                                                                                                                                                                                                                                                        |                                                                                                                                                                                                                                                                                                                                                                  | -                               | -                           | P_trifoliata_00568_mRNA_13,1    |
| GF0049602 | 0                            | 0                        | 1                            | Hypothetical protein (1)                                    |                                                                                                                                                                                                                                                                                                                                                                                                                                                                                                                        |                                                                                                                                                                                                                                                                                                                                                                  | -                               | -                           | P_trifoliata_00568_mRNA_11,1    |
| GF0049601 | 0                            | 0                        | 1                            | Hypothetical protein (1)                                    |                                                                                                                                                                                                                                                                                                                                                                                                                                                                                                                        |                                                                                                                                                                                                                                                                                                                                                                  | -                               | -                           | P_trifoliata_00567_mRNA_3,1     |
| GF0049600 | 0                            | 0                        | 1                            | Hypothetical protein (1)                                    | rRNA processing [GO:0006364 biological_process] (1); methyltransferase activity [GO:0008168 molecular_function] (1); RNA binding [GO:0001723 molecular_function] (1); rRNA processing [GO:0008033 biological_process] (1)                                                                                                                                                                                                                                                                                              | Fibrillarin [IPR009092] (1); S-adenosyl-L-methionine-dependent methyltransferase [IPR029063] (1)                                                                                                                                                                                                                                                                 | -                               | -                           | P_trifoliata_00567_mRNA_22,1    |
| GF0049599 | 0                            | 0                        | 1                            | Hypothetical protein (1)                                    |                                                                                                                                                                                                                                                                                                                                                                                                                                                                                                                        | P-loop containing nucleoside triphosphate hydrolase [IPR027417] (1)                                                                                                                                                                                                                                                                                              | -                               | -                           | P_trifoliata_00567_mRNA_2,1     |
| GF0049598 | 0                            | 0                        | 1                            | Hypothetical protein (1)                                    |                                                                                                                                                                                                                                                                                                                                                                                                                                                                                                                        |                                                                                                                                                                                                                                                                                                                                                                  | -                               | -                           | P_trifoliata_00567_mRNA_1,1     |
| GF0049597 | 0                            | 0                        | 1                            | Ras-related protein RAB11c (1)                              | small GTPase mediated signal transduction [GO:0007264 biological_process] (1); membrane [GO:0016020 cellular_component] (1); structural constituent of ribosome [GO:0007375 molecular_function] (1); signal transduction [GO:0007165 biological_process] (1); intracellular [GO:0005622 cellular_component] (1); translation [GO:0006412 biological_process] (1); GTP binding [GO:0005255 molecular_function] (1); ribosome [GO:0005840 cellular_component] (1); protein transport [GO:0015031 biological_process] (1) | Small GTPase superfamily, Rab type [IPR003579] (1); Ribosomal protein S8 [IPR006060] (1); Small GTPase superfamily, Rho type [IPR003578] (1); Small GTP-binding protein domain [IPR005225] (1); Small GTPase superfamily [IPR01806] (1); P-loop containing nucleoside triphosphate hydrolase [IPR027417] (1); Small GTPase superfamily, Ras type [IPR020849] (1) | -                               | -                           | P_trifoliata_00566_mRNA_15,1    |
| GF0049596 | 0                            | 0                        | 1                            | Hypothetical protein (1)                                    |                                                                                                                                                                                                                                                                                                                                                                                                                                                                                                                        |                                                                                                                                                                                                                                                                                                                                                                  | -                               | -                           | P_trifoliata_00566_mRNA_13,1    |
| GF0049595 | 0                            | 0                        | 1                            | Hypothetical protein (1)                                    |                                                                                                                                                                                                                                                                                                                                                                                                                                                                                                                        |                                                                                                                                                                                                                                                                                                                                                                  | -                               | -                           | P_trifoliata_00565_mRNA_7,1     |
| GF0049594 | 0                            | 0                        | 1                            | Hypothetical protein (1)                                    |                                                                                                                                                                                                                                                                                                                                                                                                                                                                                                                        |                                                                                                                                                                                                                                                                                                                                                                  | -                               | -                           | P_trifoliata_00565_mRNA_6,1     |
| GF0049593 | 0                            | 0                        | 1                            | Hypothetical protein (1)                                    |                                                                                                                                                                                                                                                                                                                                                                                                                                                                                                                        |                                                                                                                                                                                                                                                                                                                                                                  | -                               | -                           | P_trifoliata_00565_mRNA_5,1     |
| GF0049592 | 0                            | 0                        | 1                            | Hypothetical protein (1)                                    |                                                                                                                                                                                                                                                                                                                                                                                                                                                                                                                        |                                                                                                                                                                                                                                                                                                                                                                  | -                               | -                           | P_trifoliata_00565_mRNA_4,1     |
| GF0049591 | 0                            | 0                        | 1                            | Hypothetical protein (1)                                    |                                                                                                                                                                                                                                                                                                                                                                                                                                                                                                                        |                                                                                                                                                                                                                                                                                                                                                                  | -                               | -                           | P_trifoliata_00565_mRNA_3,1     |
| GF0049590 | 0                            | 0                        | 1                            | Alpha-amylase type B isozyme (1)                            | catalytic activity [GO:0003824 molecular_function] (1); carbohydrate metabolic process [GO:0005975 biological_process] (1); alpha-amylase activity [GO:0004556 molecular_function] (1); calcium ion binding [GO:0005509 molecular_function] (1)                                                                                                                                                                                                                                                                        | Glycoside hydrolase superfamily [IPR017853] (1); Glycoside hydrolase, family 13 [IPR015902] (1); Glycosyl hydrolase, family 13, all-beta [IPR013780] (1); Glycoside hydrolase, catalytic domain [IPR013781] (1); Alpha-amylase, C-terminal beta-sheet [IPR012850] (1)                                                                                            | -                               | -                           | P_trifoliata_00564_mRNA_8,1     |
| GF0049589 | 0                            | 0                        | 1                            | Hypothetical protein (1)                                    |                                                                                                                                                                                                                                                                                                                                                                                                                                                                                                                        | MULE transposase domain [IPR018289] (1); Transposase, MuDR, plant [IPR004332] (1)                                                                                                                                                                                                                                                                                | -                               | -                           | P_trifoliata_00564_mRNA_3,1     |
| GF0049588 | 0                            | 0                        | 1                            | Hypothetical protein (1)                                    | cysteine-type peptidase activity [GO:0008234 molecular_function] (1); proteolysis [GO:0006508 biological_process] (1)                                                                                                                                                                                                                                                                                                                                                                                                  | Cysteine peptidase, cysteine active site [IPR000169] (1); Peptidase C1A [IPR013125] (1); Calhepsin propeptide inhibitor domain [IPR013201] (1); Peptidase C1A, papain C-terminal [IPR006668] (1)                                                                                                                                                                 | -                               | -                           | P_trifoliata_00564_mRNA_17,1    |
| GF0049587 | 0                            | 0                        | 1                            | Hypothetical protein (1)                                    |                                                                                                                                                                                                                                                                                                                                                                                                                                                                                                                        |                                                                                                                                                                                                                                                                                                                                                                  | -                               | -                           | P_trifoliata_00564_mRNA_11,1    |

| ID        | Num. in <i>C. clementiae</i> | Num. in <i>C. canthii</i> | Num. in <i>P. trifoliatum</i> | Note                                          | GO                                                                                                                                                                                                                                                                                                                                                             | InterPro                                                                                                                                                                                                                                                                                                                                                                                                   | Members in <i>C. clementiae</i> | Members in <i>C. canthii</i> | Members in <i>P. trifoliatum</i> |
|-----------|------------------------------|---------------------------|-------------------------------|-----------------------------------------------|----------------------------------------------------------------------------------------------------------------------------------------------------------------------------------------------------------------------------------------------------------------------------------------------------------------------------------------------------------------|------------------------------------------------------------------------------------------------------------------------------------------------------------------------------------------------------------------------------------------------------------------------------------------------------------------------------------------------------------------------------------------------------------|---------------------------------|------------------------------|----------------------------------|
| GF0049586 | 0                            | 0                         | 1                             | Ferredoxin-dependent glutamate synthase 2 (1) | catalytic activity [GO:0003824 molecular_function] (1); nitrogen compound metabolic process [GO:0006807 biological_process] (1); oxidation-reduction process [GO:005114 biological_process] (1); glutamate synthase activity [GO:0015930 molecular_function] (1)                                                                                               | Glutamine amidotransferase type 2 domain [IPR017932] (1); Glutamate synthase, central-N [IPR006982] (1); Nucleophilic aminohydrolases, N-terminal [IPR029055] (1); Aldolase-type TIM barrel [IPR013785] (1)                                                                                                                                                                                                | -                               | -                            | P_trifoliata_00563_mRNA_8,1      |
| GF0049585 | 0                            | 0                         | 1                             | Hypothetical protein (1)                      | oxidation-reduction process [GO:005114 biological_process] (1); glutamate synthase activity [GO:0015930 molecular_function] (1); glutamate biosynthetic process [GO:0006537 biological_process] (1); catalytic activity [GO:0003824 molecular_function] (1); oxidoreductase activity, acting on the CH-SH2 group of donors [GO:0016638 molecular_function] (1) | Glutamate synthase domain [IPR02932] (1); Aldolase-type TIM barrel [IPR013785] (1)                                                                                                                                                                                                                                                                                                                         | -                               | -                            | P_trifoliata_00563_mRNA_7,1      |
| GF0049584 | 0                            | 0                         | 1                             | Hypothetical protein (1)                      |                                                                                                                                                                                                                                                                                                                                                                | GAG pre-integrase domain [IPR025724] (1)                                                                                                                                                                                                                                                                                                                                                                   | -                               | -                            | P_trifoliata_00563_mRNA_4,1      |
| GF0049583 | 0                            | 0                         | 1                             | Hypothetical protein (1)                      |                                                                                                                                                                                                                                                                                                                                                                |                                                                                                                                                                                                                                                                                                                                                                                                            | -                               | -                            | P_trifoliata_00563_mRNA_3,1      |
| GF0049582 | 0                            | 0                         | 1                             | Hypothetical protein (1)                      |                                                                                                                                                                                                                                                                                                                                                                |                                                                                                                                                                                                                                                                                                                                                                                                            | -                               | -                            | P_trifoliata_00563_mRNA_16,1     |
| GF0049581 | 0                            | 0                         | 1                             | Hypothetical protein (1)                      |                                                                                                                                                                                                                                                                                                                                                                |                                                                                                                                                                                                                                                                                                                                                                                                            | -                               | -                            | P_trifoliata_00563_mRNA_15,1     |
| GF0049580 | 0                            | 0                         | 1                             | Hypothetical protein (1)                      |                                                                                                                                                                                                                                                                                                                                                                |                                                                                                                                                                                                                                                                                                                                                                                                            | -                               | -                            | P_trifoliata_00562_mRNA_27,1     |
| GF0049579 | 0                            | 0                         | 1                             | Hypothetical protein (1)                      | aspartic-type endopeptidase activity [GO:0004190 molecular_function] (1); proteolysis [GO:0006508 biological_process] (1)                                                                                                                                                                                                                                      | Aspartic peptidase, active site [IPR001969] (1)                                                                                                                                                                                                                                                                                                                                                            | -                               | -                            | P_trifoliata_00562_mRNA_25,1     |
| GF0049578 | 0                            | 0                         | 1                             | Hypothetical protein (1)                      |                                                                                                                                                                                                                                                                                                                                                                |                                                                                                                                                                                                                                                                                                                                                                                                            | -                               | -                            | P_trifoliata_00562_mRNA_24,1     |
| GF0049577 | 0                            | 0                         | 1                             | Hypothetical protein (1)                      |                                                                                                                                                                                                                                                                                                                                                                |                                                                                                                                                                                                                                                                                                                                                                                                            | -                               | -                            | P_trifoliata_00562_mRNA_22,1     |
| GF0049576 | 0                            | 0                         | 1                             | Hypothetical protein (1)                      |                                                                                                                                                                                                                                                                                                                                                                |                                                                                                                                                                                                                                                                                                                                                                                                            | -                               | -                            | P_trifoliata_00562_mRNA_21,1     |
| GF0049575 | 0                            | 0                         | 1                             | Hypothetical protein (1)                      |                                                                                                                                                                                                                                                                                                                                                                |                                                                                                                                                                                                                                                                                                                                                                                                            | -                               | -                            | P_trifoliata_00562_mRNA_20,1     |
| GF0049574 | 0                            | 0                         | 1                             | Hypothetical protein (1)                      |                                                                                                                                                                                                                                                                                                                                                                |                                                                                                                                                                                                                                                                                                                                                                                                            | -                               | -                            | P_trifoliata_00562_mRNA_19,1     |
| GF0049573 | 0                            | 0                         | 1                             | Hypothetical protein (1)                      |                                                                                                                                                                                                                                                                                                                                                                |                                                                                                                                                                                                                                                                                                                                                                                                            | -                               | -                            | P_trifoliata_00562_mRNA_10,1     |
| GF0049572 | 0                            | 0                         | 1                             | Hypothetical protein (1)                      |                                                                                                                                                                                                                                                                                                                                                                |                                                                                                                                                                                                                                                                                                                                                                                                            | -                               | -                            | P_trifoliata_00562_mRNA_1,1      |
| GF0049571 | 0                            | 0                         | 1                             | Hypothetical leucine rich repeat protein (1)  | protein binding [GO:0005515 molecular_function] (1)                                                                                                                                                                                                                                                                                                            | Leucine-rich repeat [IPR001611] (1); Leucine-rich repeat, typical subtype [IPR003591] (1); Leucine-rich repeat domain, L domain-like [IPR032675] (1)                                                                                                                                                                                                                                                       | -                               | -                            | P_trifoliata_00561_mRNA_21,1     |
| GF0049570 | 0                            | 0                         | 1                             | Hypothetical protein (1)                      |                                                                                                                                                                                                                                                                                                                                                                | Leucine-rich repeat domain, L domain-like [IPR032675] (1)                                                                                                                                                                                                                                                                                                                                                  | -                               | -                            | P_trifoliata_00561_mRNA_20,1     |
| GF0049569 | 0                            | 0                         | 1                             | Hypothetical protein (1)                      | zinc ion binding [GO:0008270 molecular_function] (1); nucleic acid binding [GO:0000376 molecular_function] (1)                                                                                                                                                                                                                                                 | Zinc finger, CCHC-type [IPR001878] (1)                                                                                                                                                                                                                                                                                                                                                                     | -                               | -                            | P_trifoliata_00561_mRNA_18,1     |
| GF0049568 | 0                            | 0                         | 1                             | LRR receptor-like kinase family protein (1)   | protein binding [GO:0005515 molecular_function] (1)                                                                                                                                                                                                                                                                                                            | Leucine-rich repeat [IPR001611] (1); Leucine-rich repeat domain, L domain-like [IPR032675] (1); Leucine-rich repeat, typical subtype [IPR003591] (1)                                                                                                                                                                                                                                                       | -                               | -                            | P_trifoliata_00561_mRNA_16,1     |
| GF0049567 | 0                            | 0                         | 1                             | Hypothetical protein (1)                      |                                                                                                                                                                                                                                                                                                                                                                |                                                                                                                                                                                                                                                                                                                                                                                                            | -                               | -                            | P_trifoliata_00561_mRNA_10,1     |
| GF0049566 | 0                            | 0                         | 1                             | Hypothetical protein (1)                      |                                                                                                                                                                                                                                                                                                                                                                |                                                                                                                                                                                                                                                                                                                                                                                                            | -                               | -                            | P_trifoliata_00560_mRNA_6,1      |
| GF0049565 | 0                            | 0                         | 1                             | Hypothetical protein (1)                      |                                                                                                                                                                                                                                                                                                                                                                |                                                                                                                                                                                                                                                                                                                                                                                                            | -                               | -                            | P_trifoliata_00560_mRNA_5,1      |
| GF0049564 | 0                            | 0                         | 1                             | Hypothetical protein (1)                      | protein dimerization activity [GO:0046983 molecular_function] (1); nucleic acid binding [GO:0000376 molecular_function] (1); DNA binding [GO:0000677 molecular_function] (1)                                                                                                                                                                                   | Zinc finger, BED-type [IPR003656] (1); Ribonuclease H-like domain [IPR012337] (1); HAT, C-terminal dimerisation domain [IPR008906] (1)                                                                                                                                                                                                                                                                     | -                               | -                            | P_trifoliata_00560_mRNA_4,1      |
| GF0049563 | 0                            | 0                         | 1                             | Hypothetical protein (1)                      |                                                                                                                                                                                                                                                                                                                                                                |                                                                                                                                                                                                                                                                                                                                                                                                            | -                               | -                            | P_trifoliata_00560_mRNA_3,1      |
| GF0049562 | 0                            | 0                         | 1                             | Hypothetical protein (1)                      |                                                                                                                                                                                                                                                                                                                                                                |                                                                                                                                                                                                                                                                                                                                                                                                            | -                               | -                            | P_trifoliata_00560_mRNA_2,1      |
| GF0049561 | 0                            | 0                         | 1                             | Hypothetical protein (1)                      |                                                                                                                                                                                                                                                                                                                                                                | Transposase, MuDR, plant [IPR004332] (1)                                                                                                                                                                                                                                                                                                                                                                   | -                               | -                            | P_trifoliata_00559_mRNA_3,1      |
| GF0049560 | 0                            | 0                         | 1                             | Hypothetical protein (1)                      |                                                                                                                                                                                                                                                                                                                                                                |                                                                                                                                                                                                                                                                                                                                                                                                            | -                               | -                            | P_trifoliata_00559_mRNA_2,1      |
| GF0049559 | 0                            | 0                         | 1                             | Calcium-dependent protein kinase 16 (1)       | calcium ion binding [GO:0005509 molecular_function] (1); ATP binding [GO:0005524 molecular_function] (1); protein kinase activity [GO:0004672 molecular_function] (1); protein phosphorylation [GO:0006468 biological_process] (1)                                                                                                                             | Protein kinase-like domain [IPR011009] (1); EF-hand domain pair [IPR011992] (1); Protein kinase domain [IPR000719] (1); EF-Hand_L calcium-binding site [IPR018247] (1); Serine/threonine protein kinase, active site [IPR008271] (1); Protein kinase, ATP binding site [IPR017441] (1); EF-hand domain [IPR002048] (1); Serine/threonine/dual specificity protein kinase, catalytic domain [IPR002290] (1) | -                               | -                            | P_trifoliata_00559_mRNA_10,1     |
| GF0049558 | 0                            | 0                         | 1                             | Hypothetical protein (1)                      |                                                                                                                                                                                                                                                                                                                                                                |                                                                                                                                                                                                                                                                                                                                                                                                            | -                               | -                            | P_trifoliata_00558_mRNA_6,1      |
| GF0049557 | 0                            | 0                         | 1                             | Hypothetical protein (1)                      |                                                                                                                                                                                                                                                                                                                                                                |                                                                                                                                                                                                                                                                                                                                                                                                            | -                               | -                            | P_trifoliata_00558_mRNA_2,1      |
| GF0049556 | 0                            | 0                         | 1                             | Hypothetical protein (1)                      |                                                                                                                                                                                                                                                                                                                                                                |                                                                                                                                                                                                                                                                                                                                                                                                            | -                               | -                            | P_trifoliata_00558_mRNA_14,1     |
| GF0049555 | 0                            | 0                         | 1                             | Hypothetical protein (1)                      |                                                                                                                                                                                                                                                                                                                                                                |                                                                                                                                                                                                                                                                                                                                                                                                            | -                               | -                            | P_trifoliata_00558_mRNA_1,1      |
| GF0049554 | 0                            | 0                         | 1                             | Hypothetical protein (1)                      |                                                                                                                                                                                                                                                                                                                                                                |                                                                                                                                                                                                                                                                                                                                                                                                            | -                               | -                            | P_trifoliata_00557_mRNA_5,1      |
| GF0049553 | 0                            | 0                         | 1                             | Hypothetical protein (1)                      | carbohydrate metabolic process [GO:0005975 biological_process] (1); hydrolase activity, hydrolyzing O-glycosyl compounds [GO:0004253 molecular_function] (1)                                                                                                                                                                                                   | Glycoside hydrolase superfamily [IPR017853] (1); Glycoside hydrolase family 17 [IPR004900] (1); Glycoside hydrolase, catalytic domain [IPR013781] (1)                                                                                                                                                                                                                                                      | -                               | -                            | P_trifoliata_00557_mRNA_4,1      |
| GF0049552 | 0                            | 0                         | 1                             | Hypothetical protein (1)                      | nucleotide binding [GO:0000166 molecular_function] (1); nucleic acid binding [GO:0000376 molecular_function] (1)                                                                                                                                                                                                                                               | RNA recognition motif domain [IPR000504] (1); Nucleotide-binding alpha-beta plant domain [IPR012677] (1)                                                                                                                                                                                                                                                                                                   | -                               | -                            | P_trifoliata_00557_mRNA_19,1     |
| GF0049551 | 0                            | 0                         | 1                             | Hypothetical protein (1)                      |                                                                                                                                                                                                                                                                                                                                                                |                                                                                                                                                                                                                                                                                                                                                                                                            | -                               | -                            | P_trifoliata_00557_mRNA_18,1     |
| GF0049550 | 0                            | 0                         | 1                             | Hypothetical protein (1)                      |                                                                                                                                                                                                                                                                                                                                                                |                                                                                                                                                                                                                                                                                                                                                                                                            | -                               | -                            | P_trifoliata_00557_mRNA_17,1     |
| GF0049549 | 0                            | 0                         | 1                             | Hypothetical protein (1)                      |                                                                                                                                                                                                                                                                                                                                                                |                                                                                                                                                                                                                                                                                                                                                                                                            | -                               | -                            | P_trifoliata_00557_mRNA_16,1     |
| GF0049548 | 0                            | 0                         | 1                             | Hypothetical protein (1)                      |                                                                                                                                                                                                                                                                                                                                                                |                                                                                                                                                                                                                                                                                                                                                                                                            | -                               | -                            | P_trifoliata_00557_mRNA_15,1     |
| GF0049547 | 0                            | 0                         | 1                             | Hypothetical protein (1)                      |                                                                                                                                                                                                                                                                                                                                                                |                                                                                                                                                                                                                                                                                                                                                                                                            | -                               | -                            | P_trifoliata_00557_mRNA_14,1     |
| GF0049546 | 0                            | 0                         | 1                             | Hypothetical protein (1)                      |                                                                                                                                                                                                                                                                                                                                                                |                                                                                                                                                                                                                                                                                                                                                                                                            | -                               | -                            | P_trifoliata_00557_mRNA_12,1     |
| GF0049545 | 0                            | 0                         | 1                             | Hypothetical protein (1)                      |                                                                                                                                                                                                                                                                                                                                                                |                                                                                                                                                                                                                                                                                                                                                                                                            | -                               | -                            | P_trifoliata_00557_mRNA_10,1     |
| GF0049544 | 0                            | 0                         | 1                             | Hypothetical protein (1)                      |                                                                                                                                                                                                                                                                                                                                                                |                                                                                                                                                                                                                                                                                                                                                                                                            | -                               | -                            | P_trifoliata_00557_mRNA_1,1      |
| GF0049543 | 0                            | 0                         | 1                             | Hypothetical protein (1)                      | polygalacturonate 4- $\alpha$ -galacturonosyltransferase activity [GO:0047262 molecular_function] (1)                                                                                                                                                                                                                                                          | Plant galacturonosyltransferase GAUT [IPR029993] (1)                                                                                                                                                                                                                                                                                                                                                       | -                               | -                            | P_trifoliata_00556_mRNA_9,1      |
| GF0049542 | 0                            | 0                         | 1                             | Hypothetical protein (1)                      |                                                                                                                                                                                                                                                                                                                                                                |                                                                                                                                                                                                                                                                                                                                                                                                            | -                               | -                            | P_trifoliata_00556_mRNA_7,1      |
| GF0049541 | 0                            | 0                         | 1                             | Hypothetical protein (1)                      |                                                                                                                                                                                                                                                                                                                                                                |                                                                                                                                                                                                                                                                                                                                                                                                            | -                               | -                            | P_trifoliata_00556_mRNA_5,1      |
| GF0049540 | 0                            | 0                         | 1                             | Hypothetical protein (1)                      |                                                                                                                                                                                                                                                                                                                                                                |                                                                                                                                                                                                                                                                                                                                                                                                            | -                               | -                            | P_trifoliata_00556_mRNA_2,1      |
| GF0049539 | 0                            | 0                         | 1                             | Hypothetical protein (1)                      |                                                                                                                                                                                                                                                                                                                                                                |                                                                                                                                                                                                                                                                                                                                                                                                            | -                               | -                            | P_trifoliata_00556_mRNA_1,1      |
| GF0049538 | 0                            | 0                         | 1                             | Hypothetical protein (1)                      |                                                                                                                                                                                                                                                                                                                                                                |                                                                                                                                                                                                                                                                                                                                                                                                            | -                               | -                            | P_trifoliata_00555_mRNA_2,1      |
| GF0049537 | 0                            | 0                         | 1                             | Hypothetical protein (1)                      |                                                                                                                                                                                                                                                                                                                                                                |                                                                                                                                                                                                                                                                                                                                                                                                            | -                               | -                            | P_trifoliata_00555_mRNA_19,1     |
| GF0049536 | 0                            | 0                         | 1                             | Hypothetical protein (1)                      |                                                                                                                                                                                                                                                                                                                                                                | Alpha crystallin/Hsp20 domain [IPR002068] (1); HSP20-like chaperone [IPR008978] (1)                                                                                                                                                                                                                                                                                                                        | -                               | -                            | P_trifoliata_00555_mRNA_17,1     |
| GF0049535 | 0                            | 0                         | 1                             | Hypothetical protein (1)                      |                                                                                                                                                                                                                                                                                                                                                                |                                                                                                                                                                                                                                                                                                                                                                                                            | -                               | -                            | P_trifoliata_00555_mRNA_1,1      |
| GF0049534 | 0                            | 0                         | 1                             | Hypothetical protein (1)                      |                                                                                                                                                                                                                                                                                                                                                                |                                                                                                                                                                                                                                                                                                                                                                                                            | -                               | -                            | P_trifoliata_00554_mRNA_18,1     |
| GF0049533 | 0                            | 0                         | 1                             | Hypothetical protein (1)                      |                                                                                                                                                                                                                                                                                                                                                                | SGNH hydrolase-type esterase domain [IPR013830] (1)                                                                                                                                                                                                                                                                                                                                                        | -                               | -                            | P_trifoliata_00554_mRNA_13,1     |
| GF0049532 | 0                            | 0                         | 1                             | Hypothetical protein (1)                      |                                                                                                                                                                                                                                                                                                                                                                |                                                                                                                                                                                                                                                                                                                                                                                                            | -                               | -                            | P_trifoliata_00553_mRNA_7,1      |
| GF0049531 | 0                            | 0                         | 1                             | Hypothetical protein (1)                      |                                                                                                                                                                                                                                                                                                                                                                |                                                                                                                                                                                                                                                                                                                                                                                                            | -                               | -                            | P_trifoliata_00553_mRNA_5,1      |
| GF0049530 | 0                            | 0                         | 1                             | Hypothetical protein (1)                      |                                                                                                                                                                                                                                                                                                                                                                |                                                                                                                                                                                                                                                                                                                                                                                                            | -                               | -                            | P_trifoliata_00553_mRNA_3,1      |
| GF0049529 | 0                            | 0                         | 1                             | Hypothetical protein (1)                      |                                                                                                                                                                                                                                                                                                                                                                |                                                                                                                                                                                                                                                                                                                                                                                                            | -                               | -                            | P_trifoliata_00553_mRNA_2,1      |
| GF0049528 | 0                            | 0                         | 1                             | Hypothetical protein (1)                      |                                                                                                                                                                                                                                                                                                                                                                |                                                                                                                                                                                                                                                                                                                                                                                                            | -                               | -                            | P_trifoliata_00553_mRNA_17,1     |
| GF0049527 | 0                            | 0                         | 1                             | Hypothetical protein (1)                      |                                                                                                                                                                                                                                                                                                                                                                |                                                                                                                                                                                                                                                                                                                                                                                                            | -                               | -                            | P_trifoliata_00553_mRNA_1,1      |
| GF0049526 | 0                            | 0                         | 1                             | Egg cell-secreted protein 1.3 (1)             |                                                                                                                                                                                                                                                                                                                                                                | Prolamins-like domain [IPR008502] (1)                                                                                                                                                                                                                                                                                                                                                                      | -                               | -                            | P_trifoliata_00552_mRNA_7,1      |
| GF0049525 | 0                            | 0                         | 1                             | Hypothetical protein (1)                      |                                                                                                                                                                                                                                                                                                                                                                |                                                                                                                                                                                                                                                                                                                                                                                                            | -                               | -                            | P_trifoliata_00552_mRNA_4,1      |
| GF0049524 | 0                            | 0                         | 1                             | Hypothetical protein (1)                      |                                                                                                                                                                                                                                                                                                                                                                |                                                                                                                                                                                                                                                                                                                                                                                                            | -                               | -                            | P_trifoliata_00552_mRNA_16,1     |
| GF0049523 | 0                            | 0                         | 1                             | Hypothetical protein (1)                      |                                                                                                                                                                                                                                                                                                                                                                | NADH dehydrogenase [ubiquinone] (complex I), alpha subcomplex, subunit 2 [IPR016464] (1); Thioredoxin-like fold [IPR012336] (1)                                                                                                                                                                                                                                                                            | -                               | -                            | P_trifoliata_00551_mRNA_9,1      |
| GF0049522 | 0                            | 0                         | 1                             | Hypothetical protein (1)                      | translation release factor activity, codon specific [GO:0016149 molecular_function] (1); cytoplasm [GO:0005737 cellular_component] (1); translational termination [GO:0006615 biological_process] (1)                                                                                                                                                          | 50S ribosomal protein L30c-like [IPR029064] (1); Peptide chain release factor eRF1ARF1 [IPR004403] (1); eRF1 domain 3 [IPR005142] (1)                                                                                                                                                                                                                                                                      | -                               | -                            | P_trifoliata_00551_mRNA_8,1      |
| GF0049521 | 0                            | 0                         | 1                             | Hypothetical protein (1)                      |                                                                                                                                                                                                                                                                                                                                                                |                                                                                                                                                                                                                                                                                                                                                                                                            | -                               | -                            | P_trifoliata_00551_mRNA_7,1      |
| GF0049520 | 0                            | 0                         | 1                             | Hypothetical protein (1)                      |                                                                                                                                                                                                                                                                                                                                                                |                                                                                                                                                                                                                                                                                                                                                                                                            | -                               | -                            | P_trifoliata_00551_mRNA_2,1      |
| GF0049519 | 0                            | 0                         | 1                             | Hypothetical protein (1)                      |                                                                                                                                                                                                                                                                                                                                                                |                                                                                                                                                                                                                                                                                                                                                                                                            | -                               | -                            | P_trifoliata_00551_mRNA_14,1     |
| GF0049518 | 0                            | 0                         | 1                             | Hypothetical protein (1)                      | zinc ion binding [GO:0008270 molecular_function] (1)                                                                                                                                                                                                                                                                                                           | Zinc finger, GRF-type [IPR010666] (1)                                                                                                                                                                                                                                                                                                                                                                      | -                               | -                            | P_trifoliata_00551_mRNA_10,1     |
| GF0049517 | 0                            | 0                         | 1                             | Hypothetical protein (1)                      |                                                                                                                                                                                                                                                                                                                                                                |                                                                                                                                                                                                                                                                                                                                                                                                            | -                               | -                            | P_trifoliata_00551_mRNA_1,1      |
| GF0049516 | 0                            | 0                         | 1                             | Hypothetical protein (1)                      |                                                                                                                                                                                                                                                                                                                                                                |                                                                                                                                                                                                                                                                                                                                                                                                            | -                               | -                            | P_trifoliata_00550_mRNA_9,1      |
| GF0049515 | 0                            | 0                         | 1                             | Hypothetical protein (1)                      | zinc ion binding [GO:0008270 molecular_function] (1); nucleic acid binding [GO:0000376 molecular_function] (1)                                                                                                                                                                                                                                                 | Zinc finger, CCHC-type [IPR001878] (1)                                                                                                                                                                                                                                                                                                                                                                     | -                               | -                            | P_trifoliata_00550_mRNA_7,1      |
| GF0049514 | 0                            | 0                         | 1                             | Hypothetical protein (1)                      |                                                                                                                                                                                                                                                                                                                                                                |                                                                                                                                                                                                                                                                                                                                                                                                            | -                               | -                            | P_trifoliata_00550_mRNA_6,1      |
| GF0049513 | 0                            | 0                         | 1                             | Hypothetical protein (1)                      |                                                                                                                                                                                                                                                                                                                                                                |                                                                                                                                                                                                                                                                                                                                                                                                            | -                               | -                            | P_trifoliata_00550_mRNA_4,1      |

| ID        | Num. in <i>C. clementiae</i> | Num. in <i>C. canihii</i> | Num. in <i>P. trifoliata</i> | Note                                                           | GO                                                                                                                                                                                                                                                                                                                                                | InterPro                                                                                                                                                                                                                              | Members in <i>C. clementiae</i> | Members in <i>C. canihii</i> | Members in <i>P. trifoliata</i> |                              |
|-----------|------------------------------|---------------------------|------------------------------|----------------------------------------------------------------|---------------------------------------------------------------------------------------------------------------------------------------------------------------------------------------------------------------------------------------------------------------------------------------------------------------------------------------------------|---------------------------------------------------------------------------------------------------------------------------------------------------------------------------------------------------------------------------------------|---------------------------------|------------------------------|---------------------------------|------------------------------|
| GF0049512 | 0                            | 0                         | 1                            | Hypothetical protein (1)                                       |                                                                                                                                                                                                                                                                                                                                                   |                                                                                                                                                                                                                                       |                                 |                              | P_trifoliata_00550_mRNA_11.1    |                              |
| GF0049511 | 0                            | 0                         | 1                            | Hypothetical protein (1)                                       |                                                                                                                                                                                                                                                                                                                                                   |                                                                                                                                                                                                                                       |                                 |                              | P_trifoliata_00549_mRNA_9.1     |                              |
| GF0049510 | 0                            | 0                         | 1                            | Hypothetical protein (1)                                       |                                                                                                                                                                                                                                                                                                                                                   |                                                                                                                                                                                                                                       |                                 |                              | P_trifoliata_00549_mRNA_8.1     |                              |
| GF0049509 | 0                            | 0                         | 1                            | Hypothetical protein (1)                                       |                                                                                                                                                                                                                                                                                                                                                   |                                                                                                                                                                                                                                       |                                 |                              | P_trifoliata_00549_mRNA_11.1    |                              |
| GF0049508 | 0                            | 0                         | 1                            | Hypothetical protein (1)                                       |                                                                                                                                                                                                                                                                                                                                                   |                                                                                                                                                                                                                                       |                                 |                              | P_trifoliata_00549_mRNA_10.1    |                              |
| GF0049507 | 0                            | 0                         | 1                            | 3-ketoacyl-CoA synthase 4 (1)                                  | fatty acid biosynthetic process [GO:0006633 biological_process] (1); transferase activity, transferring acyl groups other than amino-acyl groups [GO:0016747 molecular_function] (1); catalytic activity [GO:0003824 molecular_function] (1); metabolic process [GO:0008152 biological_process] (1); membrane [GO:0016020 cellular_component] (1) | Very-long-chain 3-ketoacyl-CoA synthase [IPRO12382] (1); Thioase-like [IPRO16039] (1); 3-Oxoacyl[acyl-carrier-protein (ACP)] synthase III, C-terminal [IPRO13747] (1); FAEI-Type III polyketide synthase-like protein [IPRO13601] (1) |                                 |                              | P_trifoliata_00548_mRNA_17.1    |                              |
| GF0049506 | 0                            | 0                         | 1                            | Hypothetical protein (1)                                       |                                                                                                                                                                                                                                                                                                                                                   |                                                                                                                                                                                                                                       |                                 |                              |                                 | P_trifoliata_00548_mRNA_16.1 |
| GF0049505 | 0                            | 0                         | 1                            | 37 kDa inner envelope membrane protein, chloroplast (1)        | metabolic process [GO:0008152 biological_process] (1); methyltransferase activity [GO:0008168 molecular_function] (1); methylation [GO:0032259 biological_process] (1)                                                                                                                                                                            | Methyltransferase type 11 [IPRO13216] (1); S-adenosyl-L-methionine-dependent methyltransferase [IPRO29063] (1); SAM-binding methyltransferase MFBQ/MBSQ [IPRO3164] (1)                                                                |                                 |                              | P_trifoliata_00548_mRNA_1.1     |                              |
| GF0049504 | 0                            | 0                         | 1                            | Hypothetical protein (1)                                       |                                                                                                                                                                                                                                                                                                                                                   |                                                                                                                                                                                                                                       |                                 |                              |                                 | P_trifoliata_00547_mRNA_9.1  |
| GF0049503 | 0                            | 0                         | 1                            | Hypothetical protein (1)                                       | ADP binding [GO:0043531 molecular_function] (1)                                                                                                                                                                                                                                                                                                   | Leucine-rich repeat domain, L domain-like [IPRO32675] (1); NB-ARC [IPRO02182] (1); P-loop containing nucleoside triphosphate hydrolase [IPRO27417] (1)                                                                                |                                 |                              |                                 | P_trifoliata_00547_mRNA_7.1  |
| GF0049502 | 0                            | 0                         | 1                            | Hypothetical protein (1)                                       |                                                                                                                                                                                                                                                                                                                                                   |                                                                                                                                                                                                                                       |                                 |                              |                                 | P_trifoliata_00547_mRNA_12.1 |
| GF0049501 | 0                            | 0                         | 1                            | Hypothetical protein (1)                                       |                                                                                                                                                                                                                                                                                                                                                   |                                                                                                                                                                                                                                       |                                 |                              |                                 | P_trifoliata_00547_mRNA_1.1  |
| GF0049500 | 0                            | 0                         | 1                            | Hypothetical protein (1)                                       | phospholipid biosynthetic process [GO:000654 biological_process] (1); phosphotransferase activity, for other substituted phosphate groups [GO:0016780 molecular_function] (1); membrane [GO:0016020 cellular_component] (1)                                                                                                                       | CDP alcohol phosphatidyltransferase [IPRO0462] (1)                                                                                                                                                                                    |                                 |                              |                                 | P_trifoliata_00546_mRNA_7.1  |
| GF0049499 | 0                            | 0                         | 1                            | Hypothetical protein (1)                                       |                                                                                                                                                                                                                                                                                                                                                   |                                                                                                                                                                                                                                       |                                 |                              |                                 | P_trifoliata_00546_mRNA_3.1  |
| GF0049498 | 0                            | 0                         | 1                            | Hypothetical protein (1)                                       |                                                                                                                                                                                                                                                                                                                                                   |                                                                                                                                                                                                                                       |                                 |                              |                                 | P_trifoliata_00546_mRNA_2.1  |
| GF0049497 | 0                            | 0                         | 1                            | Hypothetical protein (1)                                       |                                                                                                                                                                                                                                                                                                                                                   |                                                                                                                                                                                                                                       |                                 |                              |                                 | P_trifoliata_00546_mRNA_17.1 |
| GF0049496 | 0                            | 0                         | 1                            | Hypothetical protein (1)                                       |                                                                                                                                                                                                                                                                                                                                                   |                                                                                                                                                                                                                                       |                                 |                              |                                 | P_trifoliata_00546_mRNA_10.1 |
| GF0049495 | 0                            | 0                         | 1                            | Hypothetical protein (1)                                       |                                                                                                                                                                                                                                                                                                                                                   |                                                                                                                                                                                                                                       |                                 |                              |                                 | P_trifoliata_00546_mRNA_1.1  |
| GF0049494 | 0                            | 0                         | 1                            | Hypothetical protein (1)                                       |                                                                                                                                                                                                                                                                                                                                                   |                                                                                                                                                                                                                                       |                                 |                              |                                 | P_trifoliata_00545_mRNA_8.1  |
| GF0049493 | 0                            | 0                         | 1                            | Hypothetical protein (1)                                       |                                                                                                                                                                                                                                                                                                                                                   |                                                                                                                                                                                                                                       |                                 |                              |                                 | P_trifoliata_00545_mRNA_19.1 |
| GF0049492 | 0                            | 0                         | 1                            | Hypothetical protein (1)                                       |                                                                                                                                                                                                                                                                                                                                                   |                                                                                                                                                                                                                                       |                                 |                              |                                 | P_trifoliata_00545_mRNA_13.1 |
| GF0049491 | 0                            | 0                         | 1                            | Hypothetical protein (1)                                       |                                                                                                                                                                                                                                                                                                                                                   |                                                                                                                                                                                                                                       |                                 |                              |                                 | P_trifoliata_00545_mRNA_12.1 |
| GF0049490 | 0                            | 0                         | 1                            | Hypothetical protein (1)                                       |                                                                                                                                                                                                                                                                                                                                                   |                                                                                                                                                                                                                                       |                                 |                              |                                 | P_trifoliata_00545_mRNA_11.1 |
| GF0049489 | 0                            | 0                         | 1                            | Hypothetical protein (1)                                       |                                                                                                                                                                                                                                                                                                                                                   |                                                                                                                                                                                                                                       |                                 |                              |                                 | P_trifoliata_00545_mRNA_10.1 |
| GF0049488 | 0                            | 0                         | 1                            | Hypothetical protein (1)                                       | metabolic process [GO:0008152 biological_process] (1); catalytic activity [GO:0003824 molecular_function] (1); trisphosphate isomerase activity [GO:0004807 molecular_function] (1)                                                                                                                                                               | Triosephosphate isomerase [IPRO000652] (1); Aldolase-type TIM barrel [IPRO13785] (1)                                                                                                                                                  |                                 |                              |                                 | P_trifoliata_00544_mRNA_9.1  |
| GF0049487 | 0                            | 0                         | 1                            | Hypothetical protein (1)                                       | proteolysis [GO:0006508 biological_process] (1); cysteine-type peptidase activity [GO:0008234 molecular_function] (1)                                                                                                                                                                                                                             | Transposon, En/Spm-like [IPRO04242] (1); Ulp1 protease family, C-terminal catalytic domain [IPRO3653] (1)                                                                                                                             |                                 |                              |                                 | P_trifoliata_00544_mRNA_8.1  |
| GF0049486 | 0                            | 0                         | 1                            | Disease resistance protein (TR-NBS-LRR class) (1)              | protein binding [GO:0005515 molecular_function] (1); ADP binding [GO:0045531 molecular_function] (1); signal transduction [GO:0007165 biological_process] (1)                                                                                                                                                                                     | Leucine-rich repeat domain, L domain-like [IPRO32675] (1); Toll/interleukin-1 receptor homology (TIR) domain [IPRO00157] (1); NB-ARC [IPRO002182] (1); P-loop containing nucleoside triphosphate hydrolase [IPRO27417] (1)            |                                 |                              |                                 | P_trifoliata_00544_mRNA_7.1  |
| GF0049485 | 0                            | 0                         | 1                            | SH3 domain-containing protein 2 (1)                            | protein binding [GO:0005515 molecular_function] (1)                                                                                                                                                                                                                                                                                               | SH3 domain [IPRO01452] (1)                                                                                                                                                                                                            |                                 |                              |                                 | P_trifoliata_00544_mRNA_4.1  |
| GF0049484 | 0                            | 0                         | 1                            | Hypothetical protein (1)                                       |                                                                                                                                                                                                                                                                                                                                                   |                                                                                                                                                                                                                                       |                                 |                              |                                 | P_trifoliata_00543_mRNA_21.1 |
| GF0049483 | 0                            | 0                         | 1                            | Cyclin-dependent serine/threonine protein kinase isoform 1 (1) | protein phosphorylation [GO:0006468 biological_process] (1); protein kinase activity [GO:0004672 molecular_function] (1); ATP binding [GO:0005524 molecular_function] (1)                                                                                                                                                                         | Protein kinase-like domain [IPRO11009] (1); Protein kinase domain [IPRO000719] (1); Protein kinase, ATP binding site [IPRO17441] (1)                                                                                                  |                                 |                              |                                 | P_trifoliata_00543_mRNA_14.1 |
| GF0049482 | 0                            | 0                         | 1                            | Hypothetical protein (1)                                       |                                                                                                                                                                                                                                                                                                                                                   |                                                                                                                                                                                                                                       |                                 |                              |                                 | P_trifoliata_00542_mRNA_3.1  |
| GF0049481 | 0                            | 0                         | 1                            | LRR receptor-like serine/threonine-protein kinase GSO1 (1)     | protein binding [GO:0005515 molecular_function] (1)                                                                                                                                                                                                                                                                                               | Leucine-rich repeat domain, L domain-like [IPRO32675] (1); Leucine-rich repeat, typical subtype [IPRO03591] (1); Leucine-rich repeat-containing N-terminal, plant-type [IPRO13210] (1); Leucine-rich repeat [IPRO01611] (1)           |                                 |                              |                                 | P_trifoliata_00542_mRNA_14.1 |
| GF0049480 | 0                            | 0                         | 1                            | Hypothetical protein (1)                                       |                                                                                                                                                                                                                                                                                                                                                   |                                                                                                                                                                                                                                       |                                 |                              |                                 | P_trifoliata_00542_mRNA_10.1 |
| GF0049479 | 0                            | 0                         | 1                            | Hypothetical protein (1)                                       |                                                                                                                                                                                                                                                                                                                                                   |                                                                                                                                                                                                                                       |                                 |                              |                                 | P_trifoliata_00542_mRNA_1.1  |
| GF0049478 | 0                            | 0                         | 1                            | Hypothetical protein (1)                                       |                                                                                                                                                                                                                                                                                                                                                   |                                                                                                                                                                                                                                       |                                 |                              |                                 | P_trifoliata_00541_mRNA_9.1  |
| GF0049477 | 0                            | 0                         | 1                            | Thioredoxin-dependent peroxidase 2 (1)                         | oxidoreductase activity [GO:0016491 molecular_function] (1)                                                                                                                                                                                                                                                                                       | Peptidase M20, dimerisation domain [IPRO11650] (1); Thioredoxin-like fold [IPRO12336] (1); Redoxin [IPRO13740] (1)                                                                                                                    |                                 |                              |                                 | P_trifoliata_00541_mRNA_7.1  |
| GF0049476 | 0                            | 0                         | 1                            | Hypothetical protein (1)                                       | nucleic acid binding [GO:0003676 molecular_function] (1)                                                                                                                                                                                                                                                                                          | DNA-RNA-binding protein Alba-like [IPRO02775] (1)                                                                                                                                                                                     |                                 |                              |                                 | P_trifoliata_00541_mRNA_6.1  |
| GF0049475 | 0                            | 0                         | 1                            | Ankyrin repeat plant-like protein (1)                          | protein binding [GO:0005515 molecular_function] (1)                                                                                                                                                                                                                                                                                               | Ankyrin repeat-containing domain [IPRO20685] (1); PGG domain [IPRO26961] (1); Ankyrin repeat [IPRO02110] (1)                                                                                                                          |                                 |                              |                                 | P_trifoliata_00541_mRNA_4.1  |
| GF0049474 | 0                            | 0                         | 1                            | Hypothetical protein (1)                                       | protein binding [GO:0005515 molecular_function] (1)                                                                                                                                                                                                                                                                                               | PGG domain [IPRO26961] (1); Ankyrin repeat-containing domain [IPRO20683] (1); Domain of unknown function DUF1985 [IPRO15410] (1); Ankyrin repeat [IPRO02110] (1)                                                                      |                                 |                              |                                 | P_trifoliata_00541_mRNA_2.1  |
| GF0049473 | 0                            | 0                         | 1                            | Hypothetical protein (1)                                       | protein binding [GO:0005515 molecular_function] (1)                                                                                                                                                                                                                                                                                               | Ankyrin repeat-containing domain [IPRO20683] (1); Ankyrin repeat [IPRO02110] (1)                                                                                                                                                      |                                 |                              |                                 | P_trifoliata_00541_mRNA_1.1  |
| GF0049472 | 0                            | 0                         | 1                            | Hypothetical protein (1)                                       |                                                                                                                                                                                                                                                                                                                                                   | Transposon, En/Spm-like [IPRO04242] (1)                                                                                                                                                                                               |                                 |                              |                                 | P_trifoliata_00540_mRNA_7.1  |
| GF0049471 | 0                            | 0                         | 1                            | Shikimate kinase (1)                                           |                                                                                                                                                                                                                                                                                                                                                   | Shikimate kinase/gluconokinase [IPRO13322] (1); P-loop containing nucleoside triphosphate hydrolase [IPRO27417] (1)                                                                                                                   |                                 |                              |                                 | P_trifoliata_00540_mRNA_6.1  |
| GF0049470 | 0                            | 0                         | 1                            | Hypothetical protein (1)                                       |                                                                                                                                                                                                                                                                                                                                                   |                                                                                                                                                                                                                                       |                                 |                              |                                 | P_trifoliata_00540_mRNA_3.1  |
| GF0049469 | 0                            | 0                         | 1                            | Hypothetical protein (1)                                       |                                                                                                                                                                                                                                                                                                                                                   | Chromo domain-like [IPRO16197] (1); Chromo domain [IPRO25780] (1)                                                                                                                                                                     |                                 |                              |                                 | P_trifoliata_00540_mRNA_11.1 |
| GF0049468 | 0                            | 0                         | 1                            | Hypothetical protein (1)                                       |                                                                                                                                                                                                                                                                                                                                                   |                                                                                                                                                                                                                                       |                                 |                              |                                 | P_trifoliata_00539_mRNA_9.1  |
| GF0049467 | 0                            | 0                         | 1                            | Hypothetical protein (1)                                       |                                                                                                                                                                                                                                                                                                                                                   |                                                                                                                                                                                                                                       |                                 |                              |                                 | P_trifoliata_00539_mRNA_2.1  |
| GF0049466 | 0                            | 0                         | 1                            | Hypothetical protein (1)                                       |                                                                                                                                                                                                                                                                                                                                                   |                                                                                                                                                                                                                                       |                                 |                              |                                 | P_trifoliata_00539_mRNA_12.1 |
| GF0049465 | 0                            | 0                         | 1                            | Hypothetical protein (1)                                       |                                                                                                                                                                                                                                                                                                                                                   |                                                                                                                                                                                                                                       |                                 |                              |                                 | P_trifoliata_00539_mRNA_1.1  |
| GF0049464 | 0                            | 0                         | 1                            | Hypothetical protein (1)                                       |                                                                                                                                                                                                                                                                                                                                                   |                                                                                                                                                                                                                                       |                                 |                              |                                 | P_trifoliata_00538_mRNA_7.1  |
| GF0049463 | 0                            | 0                         | 1                            | Hypothetical protein (1)                                       |                                                                                                                                                                                                                                                                                                                                                   |                                                                                                                                                                                                                                       |                                 |                              |                                 | P_trifoliata_00538_mRNA_20.1 |
| GF0049462 | 0                            | 0                         | 1                            | Hypothetical protein (1)                                       |                                                                                                                                                                                                                                                                                                                                                   |                                                                                                                                                                                                                                       |                                 |                              |                                 | P_trifoliata_00538_mRNA_2.1  |
| GF0049461 | 0                            | 0                         | 1                            | Hypothetical protein (1)                                       |                                                                                                                                                                                                                                                                                                                                                   |                                                                                                                                                                                                                                       |                                 |                              |                                 | P_trifoliata_00538_mRNA_19.1 |
| GF0049460 | 0                            | 0                         | 1                            | Hypothetical protein (1)                                       |                                                                                                                                                                                                                                                                                                                                                   |                                                                                                                                                                                                                                       |                                 |                              |                                 | P_trifoliata_00538_mRNA_18.1 |
| GF0049459 | 0                            | 0                         | 1                            | Hypothetical protein (1)                                       |                                                                                                                                                                                                                                                                                                                                                   |                                                                                                                                                                                                                                       |                                 |                              |                                 | P_trifoliata_00538_mRNA_1.1  |
| GF0049458 | 0                            | 0                         | 1                            | Hypothetical protein (1)                                       |                                                                                                                                                                                                                                                                                                                                                   |                                                                                                                                                                                                                                       |                                 |                              |                                 | P_trifoliata_00537_mRNA_8.1  |
| GF0049457 | 0                            | 0                         | 1                            | Hypothetical protein (1)                                       |                                                                                                                                                                                                                                                                                                                                                   |                                                                                                                                                                                                                                       |                                 |                              |                                 | P_trifoliata_00537_mRNA_5.1  |
| GF0049456 | 0                            | 0                         | 1                            | Hypothetical protein (1)                                       | nucleic acid binding [GO:0003676 molecular_function] (1); zinc ion binding [GO:0008270 molecular_function] (1)                                                                                                                                                                                                                                    | Zinc finger, CCHC-type [IPRO1878] (1)                                                                                                                                                                                                 |                                 |                              |                                 | P_trifoliata_00537_mRNA_3.1  |
| GF0049455 | 0                            | 0                         | 1                            | Hypothetical protein (1)                                       |                                                                                                                                                                                                                                                                                                                                                   |                                                                                                                                                                                                                                       |                                 |                              |                                 | P_trifoliata_00537_mRNA_20.1 |
| GF0049454 | 0                            | 0                         | 1                            | Hypothetical protein (1)                                       |                                                                                                                                                                                                                                                                                                                                                   |                                                                                                                                                                                                                                       |                                 |                              |                                 | P_trifoliata_00537_mRNA_14.1 |
| GF0049453 | 0                            | 0                         | 1                            | Hypothetical protein (1)                                       |                                                                                                                                                                                                                                                                                                                                                   |                                                                                                                                                                                                                                       |                                 |                              |                                 | P_trifoliata_00537_mRNA_13.1 |
| GF0049452 | 0                            | 0                         | 1                            | Hypothetical protein (1)                                       |                                                                                                                                                                                                                                                                                                                                                   | Transposon, En/Spm-like [IPRO04242] (1)                                                                                                                                                                                               |                                 |                              |                                 | P_trifoliata_00537_mRNA_12.1 |
| GF0049451 | 0                            | 0                         | 1                            | Hypothetical protein (1)                                       |                                                                                                                                                                                                                                                                                                                                                   |                                                                                                                                                                                                                                       |                                 |                              |                                 | P_trifoliata_00537_mRNA_11.1 |
| GF0049450 | 0                            | 0                         | 1                            | Hypothetical protein (1)                                       |                                                                                                                                                                                                                                                                                                                                                   |                                                                                                                                                                                                                                       |                                 |                              |                                 | P_trifoliata_00537_mRNA_10.1 |
| GF0049449 | 0                            | 0                         | 1                            | Hypothetical protein (1)                                       |                                                                                                                                                                                                                                                                                                                                                   |                                                                                                                                                                                                                                       |                                 |                              |                                 | P_trifoliata_00536_mRNA_8.1  |
| GF0049448 | 0                            | 0                         | 1                            | Hypothetical protein (1)                                       |                                                                                                                                                                                                                                                                                                                                                   |                                                                                                                                                                                                                                       |                                 |                              |                                 | P_trifoliata_00536_mRNA_6.1  |
| GF0049447 | 0                            | 0                         | 1                            | Hypothetical protein (1)                                       |                                                                                                                                                                                                                                                                                                                                                   |                                                                                                                                                                                                                                       |                                 |                              |                                 | P_trifoliata_00536_mRNA_10.1 |
| GF0049446 | 0                            | 0                         | 1                            | Hypothetical protein (1)                                       |                                                                                                                                                                                                                                                                                                                                                   |                                                                                                                                                                                                                                       |                                 |                              |                                 | P_trifoliata_00536_mRNA_1.1  |
| GF0049445 | 0                            | 0                         | 1                            | Hypothetical protein (1)                                       | transporter activity [GO:0005215 molecular_function] (1); transport [GO:0006810 biological_process] (1); membrane [GO:0016020 cellular_component] (1)                                                                                                                                                                                             | Proton-dependent oligopeptide transporter family [IPRO0109] (1)                                                                                                                                                                       |                                 |                              |                                 | P_trifoliata_00535_mRNA_9.1  |
| GF0049444 | 0                            | 0                         | 1                            | Hypothetical protein (1)                                       | transporter activity [GO:0005215 molecular_function] (1); membrane [GO:0016020 cellular_component] (1); transport [GO:0006810 biological_process] (1); membrane [GO:0016020 cellular_component] (1); transporter activity [GO:0005215 molecular_function] (1)                                                                                     | Proton-dependent oligopeptide transporter family [IPRO0109] (1)                                                                                                                                                                       |                                 |                              |                                 | P_trifoliata_00535_mRNA_6.1  |

| ID        | Num. in <i>C. clementiae</i> | Num. in <i>C. canihii</i> | Num. in <i>P. trifoliata</i> | Note                                                     | GO                                                                                                                                                                                                                                                                                                                 | InterPro                                                                                                                                                                                                        | Members in <i>C. clementiae</i> | Members in <i>C. canihii</i> | Members in <i>P. trifoliata</i> |
|-----------|------------------------------|---------------------------|------------------------------|----------------------------------------------------------|--------------------------------------------------------------------------------------------------------------------------------------------------------------------------------------------------------------------------------------------------------------------------------------------------------------------|-----------------------------------------------------------------------------------------------------------------------------------------------------------------------------------------------------------------|---------------------------------|------------------------------|---------------------------------|
| GF0049443 | 0                            | 0                         | 1                            | Tau class glutathione S-transferase (1)                  | protein binding [GO:0005515 molecular_function] (1)                                                                                                                                                                                                                                                                | Glutathione S-transferase, C-terminal-like [IPRO10987] (1); Glutathione S-transferase, N-terminal [IPRO04045] (1); Thioredoxin-like fold [IPRO12336] (1); Glutathione S-transferase, C-terminal [IPRO04046] (1) | -                               | -                            | P_trifoliata_00535_mRNA_4,1     |
| GF0049442 | 0                            | 0                         | 1                            | Hypothetical protein (1)                                 | -                                                                                                                                                                                                                                                                                                                  | -                                                                                                                                                                                                               | -                               | -                            | P_trifoliata_00535_mRNA_23,1    |
| GF0049441 | 0                            | 0                         | 1                            | Hypothetical protein (1)                                 | -                                                                                                                                                                                                                                                                                                                  | -                                                                                                                                                                                                               | -                               | -                            | P_trifoliata_00534_mRNA_6,1     |
| GF0049440 | 0                            | 0                         | 1                            | Transcription factor bHLH61 (1)                          | protein dimerization activity [GO:0046983 molecular_function] (1)                                                                                                                                                                                                                                                  | Myc-type, basic helix-loop-helix (bHLH) domain [IPRO1598] (1)                                                                                                                                                   | -                               | -                            | P_trifoliata_00534_mRNA_29,1    |
| GF0049439 | 0                            | 0                         | 1                            | Hypothetical protein (1)                                 | -                                                                                                                                                                                                                                                                                                                  | Domain of unknown function DUF4283 [IPRO25558] (1)                                                                                                                                                              | -                               | -                            | P_trifoliata_00533_mRNA_2,1     |
| GF0049438 | 0                            | 0                         | 1                            | Hypothetical protein (1)                                 | -                                                                                                                                                                                                                                                                                                                  | -                                                                                                                                                                                                               | -                               | -                            | P_trifoliata_00533_mRNA_16,1    |
| GF0049437 | 0                            | 0                         | 1                            | Hypothetical protein (1)                                 | -                                                                                                                                                                                                                                                                                                                  | Reverse transcriptase, RNA-dependent DNA polymerase [IPRO13103] (1)                                                                                                                                             | -                               | -                            | P_trifoliata_00533_mRNA_15,1    |
| GF0049436 | 0                            | 0                         | 1                            | Hypothetical protein (1)                                 | -                                                                                                                                                                                                                                                                                                                  | -                                                                                                                                                                                                               | -                               | -                            | P_trifoliata_00533_mRNA_14,1    |
| GF0049435 | 0                            | 0                         | 1                            | Hypothetical protein (1)                                 | DNA binding [GO:0003677 molecular_function] (1)                                                                                                                                                                                                                                                                    | DNA-binding pseudobarrel domain [IPRO15300] (1); B3 DNA binding domain [IPRO03340] (1)                                                                                                                          | -                               | -                            | P_trifoliata_00533_mRNA_10,1    |
| GF0049434 | 0                            | 0                         | 1                            | Hypothetical protein (1)                                 | -                                                                                                                                                                                                                                                                                                                  | -                                                                                                                                                                                                               | -                               | -                            | P_trifoliata_00532_mRNA_6,1     |
| GF0049433 | 0                            | 0                         | 1                            | Hypothetical protein (1)                                 | -                                                                                                                                                                                                                                                                                                                  | -                                                                                                                                                                                                               | -                               | -                            | P_trifoliata_00532_mRNA_5,1     |
| GF0049432 | 0                            | 0                         | 1                            | Hypothetical protein (1)                                 | -                                                                                                                                                                                                                                                                                                                  | -                                                                                                                                                                                                               | -                               | -                            | P_trifoliata_00532_mRNA_19,1    |
| GF0049431 | 0                            | 0                         | 1                            | Lambda class glutathione S-transferase (1)               | protein binding [GO:0005515 molecular_function] (1)                                                                                                                                                                                                                                                                | Thioredoxin-like fold [IPRO12336] (1); Glutathione S-transferase, C-terminal-like [IPRO10987] (1); Glutathione S-transferase, N-terminal [IPRO04045] (1)                                                        | -                               | -                            | P_trifoliata_00532_mRNA_15,1    |
| GF0049430 | 0                            | 0                         | 1                            | Pentatricopeptide repeat-containing protein A2g37320 (1) | -                                                                                                                                                                                                                                                                                                                  | Pentatricopeptide repeat [IPRO2885] (1)                                                                                                                                                                         | -                               | -                            | P_trifoliata_00532_mRNA_1,1     |
| GF0049429 | 0                            | 0                         | 1                            | Hypothetical protein (1)                                 | -                                                                                                                                                                                                                                                                                                                  | -                                                                                                                                                                                                               | -                               | -                            | P_trifoliata_00531_mRNA_6,1     |
| GF0049428 | 0                            | 0                         | 1                            | Hypothetical protein (1)                                 | -                                                                                                                                                                                                                                                                                                                  | -                                                                                                                                                                                                               | -                               | -                            | P_trifoliata_00531_mRNA_4,1     |
| GF0049427 | 0                            | 0                         | 1                            | Hypothetical protein (1)                                 | -                                                                                                                                                                                                                                                                                                                  | -                                                                                                                                                                                                               | -                               | -                            | P_trifoliata_00531_mRNA_25,1    |
| GF0049426 | 0                            | 0                         | 1                            | Hypothetical protein (1)                                 | -                                                                                                                                                                                                                                                                                                                  | -                                                                                                                                                                                                               | -                               | -                            | P_trifoliata_00531_mRNA_21,1    |
| GF0049425 | 0                            | 0                         | 1                            | Hypothetical protein (1)                                 | -                                                                                                                                                                                                                                                                                                                  | Isopenicillin N synthase-like [IPRO27443] (1); Non-haem dioxygenase N-terminal domain [IPRO26992] (1)                                                                                                           | -                               | -                            | P_trifoliata_00531_mRNA_20,1    |
| GF0049424 | 0                            | 0                         | 1                            | SENESCENCE-RELATED GENE1 family protein (1)              | oxidation-reduction process [GO:0055114 biological_process] (1); oxidoreductase activity [GO:0016491 molecular_function] (1)                                                                                                                                                                                       | Oxoglutarate/iron-dependent dioxygenase [IPRO05121] (1); Non-haem dioxygenase N-terminal domain [IPRO26992] (1); Isopenicillin N synthase-like [IPRO27443] (1)                                                  | -                               | -                            | P_trifoliata_00531_mRNA_19,1    |
| GF0049423 | 0                            | 0                         | 1                            | Hypothetical protein (1)                                 | -                                                                                                                                                                                                                                                                                                                  | -                                                                                                                                                                                                               | -                               | -                            | P_trifoliata_00531_mRNA_17,1    |
| GF0049422 | 0                            | 0                         | 1                            | Hypothetical protein (1)                                 | -                                                                                                                                                                                                                                                                                                                  | -                                                                                                                                                                                                               | -                               | -                            | P_trifoliata_00531_mRNA_13,1    |
| GF0049421 | 0                            | 0                         | 1                            | Hypothetical protein (1)                                 | DNA binding [GO:0003677 molecular_function] (1); protein dimerization activity [GO:0046983 molecular_function] (1)                                                                                                                                                                                                 | Transcription factor, MADS-box [IPRO02100] (1)                                                                                                                                                                  | -                               | -                            | P_trifoliata_00531_mRNA_11,1    |
| GF0049420 | 0                            | 0                         | 1                            | Hypothetical protein (1)                                 | -                                                                                                                                                                                                                                                                                                                  | -                                                                                                                                                                                                               | -                               | -                            | P_trifoliata_00531_mRNA_1,1     |
| GF0049419 | 0                            | 0                         | 1                            | Phytoene desaturase (1)                                  | oxidoreductase activity [GO:0016491 molecular_function] (1); oxidation-reduction process [GO:0055114 biological_process] (1); carotene 7,8-desaturase activity [GO:0016719 molecular_function] (1); carotenoid biosynthetic process [GO:0016117 biological_process] (1)                                            | Zeta-carotene desaturase [IPRO14103] (1); Leucine-rich repeat domain, L domain-like [IPRO32575] (1); Amine oxidase [IPRO02937] (1); FAD/NAD(P)-binding domain [IPRO23753] (1)                                   | -                               | -                            | P_trifoliata_00530_mRNA_6,1     |
| GF0049418 | 0                            | 0                         | 1                            | Hypothetical protein (1)                                 | -                                                                                                                                                                                                                                                                                                                  | Domain of unknown function DUF4283 [IPRO25558] (1); Endonuclease/exonuclease/phosphatase [IPRO05135] (1)                                                                                                        | -                               | -                            | P_trifoliata_00530_mRNA_17,1    |
| GF0049417 | 0                            | 0                         | 1                            | DUF674 family protein (1)                                | -                                                                                                                                                                                                                                                                                                                  | Protein of unknown function DUF674 [IPRO07750] (1)                                                                                                                                                              | -                               | -                            | P_trifoliata_00529_mRNA_16,1    |
| GF0049416 | 0                            | 0                         | 1                            | Hypothetical protein (1)                                 | -                                                                                                                                                                                                                                                                                                                  | -                                                                                                                                                                                                               | -                               | -                            | P_trifoliata_00528_mRNA_6,1     |
| GF0049415 | 0                            | 0                         | 1                            | Hypothetical protein (1)                                 | -                                                                                                                                                                                                                                                                                                                  | -                                                                                                                                                                                                               | -                               | -                            | P_trifoliata_00528_mRNA_2,1     |
| GF0049414 | 0                            | 0                         | 1                            | Hypothetical protein (1)                                 | -                                                                                                                                                                                                                                                                                                                  | -                                                                                                                                                                                                               | -                               | -                            | P_trifoliata_00528_mRNA_12,1    |
| GF0049413 | 0                            | 0                         | 1                            | Hypothetical protein (1)                                 | -                                                                                                                                                                                                                                                                                                                  | -                                                                                                                                                                                                               | -                               | -                            | P_trifoliata_00528_mRNA_11,1    |
| GF0049412 | 0                            | 0                         | 1                            | Hypothetical protein (1)                                 | -                                                                                                                                                                                                                                                                                                                  | -                                                                                                                                                                                                               | -                               | -                            | P_trifoliata_00528_mRNA_10,1    |
| GF0049411 | 0                            | 0                         | 1                            | Hypothetical protein (1)                                 | -                                                                                                                                                                                                                                                                                                                  | -                                                                                                                                                                                                               | -                               | -                            | P_trifoliata_00527_mRNA_7,1     |
| GF0049410 | 0                            | 0                         | 1                            | Hypothetical protein (1)                                 | -                                                                                                                                                                                                                                                                                                                  | -                                                                                                                                                                                                               | -                               | -                            | P_trifoliata_00527_mRNA_5,1     |
| GF0049409 | 0                            | 0                         | 1                            | Hypothetical protein (1)                                 | nucleic acid binding [GO:0003676 molecular_function] (1)                                                                                                                                                                                                                                                           | Ribonuclease H-like domain [IPRO12337] (1)                                                                                                                                                                      | -                               | -                            | P_trifoliata_00527_mRNA_3,1     |
| GF0049408 | 0                            | 0                         | 1                            | Hypothetical protein (1)                                 | -                                                                                                                                                                                                                                                                                                                  | -                                                                                                                                                                                                               | -                               | -                            | P_trifoliata_00527_mRNA_19,1    |
| GF0049407 | 0                            | 0                         | 1                            | Hypothetical protein (1)                                 | -                                                                                                                                                                                                                                                                                                                  | -                                                                                                                                                                                                               | -                               | -                            | P_trifoliata_00527_mRNA_18,1    |
| GF0049406 | 0                            | 0                         | 1                            | Hypothetical protein (1)                                 | -                                                                                                                                                                                                                                                                                                                  | -                                                                                                                                                                                                               | -                               | -                            | P_trifoliata_00527_mRNA_17,1    |
| GF0049405 | 0                            | 0                         | 1                            | Hypothetical protein (1)                                 | -                                                                                                                                                                                                                                                                                                                  | -                                                                                                                                                                                                               | -                               | -                            | P_trifoliata_00527_mRNA_15,1    |
| GF0049404 | 0                            | 0                         | 1                            | Hypothetical protein (1)                                 | diacylglycerol O-acyltransferase activity [GO:0004144 molecular_function] (1)                                                                                                                                                                                                                                      | O-acyltransferase WSD1, C-terminal [IPRO09721] (1)                                                                                                                                                              | -                               | -                            | P_trifoliata_00527_mRNA_12,1    |
| GF0049403 | 0                            | 0                         | 1                            | Calmodulin (1)                                           | calcium ion binding [GO:0005509 molecular_function] (1)                                                                                                                                                                                                                                                            | EF-Hand 1, calcium-binding site [IPRO18247] (1); EF-hand domain [IPRO2048] (1); EF-hand domain pair [IPRO11995] (1)                                                                                             | -                               | -                            | P_trifoliata_00527_mRNA_1,1     |
| GF0049402 | 0                            | 0                         | 1                            | Hypothetical protein (1)                                 | -                                                                                                                                                                                                                                                                                                                  | -                                                                                                                                                                                                               | -                               | -                            | P_trifoliata_00526_mRNA_5,1     |
| GF0049401 | 0                            | 0                         | 1                            | Hypothetical protein (1)                                 | -                                                                                                                                                                                                                                                                                                                  | -                                                                                                                                                                                                               | -                               | -                            | P_trifoliata_00526_mRNA_4,1     |
| GF0049400 | 0                            | 0                         | 1                            | Terpene cyclase/mutase family member (1)                 | -                                                                                                                                                                                                                                                                                                                  | Squalene cyclase, C-terminal [IPRO12096] (1); Squalene cyclase, N-terminal [IPRO2697] (1); Terpenoid cyclases/protein prenyltransferase alpha-alpha toroid [IPRO08930] (1)                                      | -                               | -                            | P_trifoliata_00526_mRNA_2,1     |
| GF0049399 | 0                            | 0                         | 1                            | Hypothetical protein (1)                                 | -                                                                                                                                                                                                                                                                                                                  | -                                                                                                                                                                                                               | -                               | -                            | P_trifoliata_00526_mRNA_1,1     |
| GF0049398 | 0                            | 0                         | 1                            | Hypothetical protein (1)                                 | -                                                                                                                                                                                                                                                                                                                  | -                                                                                                                                                                                                               | -                               | -                            | P_trifoliata_00525_mRNA_7,1     |
| GF0049397 | 0                            | 0                         | 1                            | MADS-box transcription factor 50 (1)                     | DNA binding [GO:0003677 molecular_function] (1); protein dimerization activity [GO:0046983 molecular_function] (1)                                                                                                                                                                                                 | Transcription factor, MADS-box [IPRO02100] (1)                                                                                                                                                                  | -                               | -                            | P_trifoliata_00525_mRNA_18,1    |
| GF0049396 | 0                            | 0                         | 1                            | Hypothetical protein (1)                                 | -                                                                                                                                                                                                                                                                                                                  | -                                                                                                                                                                                                               | -                               | -                            | P_trifoliata_00525_mRNA_13,1    |
| GF0049395 | 0                            | 0                         | 1                            | Ce-nbs-lrr resistance protein, putative isoform 1 (1)    | -                                                                                                                                                                                                                                                                                                                  | Leucine-rich repeat domain, L domain-like [IPRO32675] (1)                                                                                                                                                       | -                               | -                            | P_trifoliata_00525_mRNA_1,1     |
| GF0049394 | 0                            | 0                         | 1                            | Hypothetical protein (1)                                 | ATP binding [GO:0005524 molecular_function] (1); protein phosphorylation [GO:0006468 biological_process] (1); protein kinase activity [GO:0004672 molecular_function] (1)                                                                                                                                          | Protein kinase domain [IPRO00719] (1); Reverse transcriptase domain [IPRO0477] (1); Protein kinase-like domain [IPRO11099] (1); Serine/threonine/tyrosine-protein kinase catalytic domain [IPRO01245] (1)       | -                               | -                            | P_trifoliata_00524_mRNA_27,1    |
| GF0049393 | 0                            | 0                         | 1                            | Hypothetical protein (1)                                 | -                                                                                                                                                                                                                                                                                                                  | -                                                                                                                                                                                                               | -                               | -                            | P_trifoliata_00524_mRNA_24,1    |
| GF0049392 | 0                            | 0                         | 1                            | Cytochrome P450 76C1 (1)                                 | iron ion binding [GO:0005506 molecular_function] (1); heme binding [GO:0020037 molecular_function] (1); oxidoreductase activity, acting on paired donors, with incorporation or reduction of molecular oxygen [GO:0016705 molecular_function] (1); oxidation-reduction process [GO:0055114 biological_process] (1) | Cytochrome P450, F-class, group 1 [IPRO02401] (1); Cytochrome P450, conserved site [IPRO11972] (1); Cytochrome P450 [IPRO01128] (1)                                                                             | -                               | -                            | P_trifoliata_00524_mRNA_20,1    |
| GF0049391 | 0                            | 0                         | 1                            | Hypothetical protein (1)                                 | structural constituent of ribosome [GO:0003735 molecular_function] (1); translation [GO:0006412 biological_process] (1); intracellular [GO:0005622 cellular_component] (1); ribosome [GO:0005840 cellular_component] (1)                                                                                           | Ribosomal protein S8e [IPRO01047] (1); Ribosomal protein S8e/ribosomal biogenesis NSA2 [IPRO22309] (1)                                                                                                          | -                               | -                            | P_trifoliata_00524_mRNA_1,1     |
| GF0049390 | 0                            | 0                         | 1                            | Hypothetical protein (1)                                 | -                                                                                                                                                                                                                                                                                                                  | -                                                                                                                                                                                                               | -                               | -                            | P_trifoliata_00523_mRNA_7,1     |
| GF0049389 | 0                            | 0                         | 1                            | Hypothetical protein (1)                                 | -                                                                                                                                                                                                                                                                                                                  | -                                                                                                                                                                                                               | -                               | -                            | P_trifoliata_00523_mRNA_4,1     |
| GF0049388 | 0                            | 0                         | 1                            | Hypothetical protein (1)                                 | -                                                                                                                                                                                                                                                                                                                  | -                                                                                                                                                                                                               | -                               | -                            | P_trifoliata_00523_mRNA_25,1    |
| GF0049387 | 0                            | 0                         | 1                            | Hypothetical protein (1)                                 | -                                                                                                                                                                                                                                                                                                                  | -                                                                                                                                                                                                               | -                               | -                            | P_trifoliata_00523_mRNA_24,1    |
| GF0049386 | 0                            | 0                         | 1                            | Hypothetical protein (1)                                 | -                                                                                                                                                                                                                                                                                                                  | -                                                                                                                                                                                                               | -                               | -                            | P_trifoliata_00523_mRNA_20,1    |
| GF0049385 | 0                            | 0                         | 1                            | Disease resistance protein (1)                           | -                                                                                                                                                                                                                                                                                                                  | -                                                                                                                                                                                                               | -                               | -                            | P_trifoliata_00523_mRNA_2,1     |
| GF0049384 | 0                            | 0                         | 1                            | Hypothetical protein (1)                                 | checkpoint clamp complex [GO:0030896 cellular_component] (1); DNA damage checkpoint [GO:0000077 biological_process] (1); DNA repair [GO:0006281 biological_process] (1)                                                                                                                                            | Checkpoint protein Hus1/Mec3 [IPRO07150] (1)                                                                                                                                                                    | -                               | -                            | P_trifoliata_00523_mRNA_15,1    |
| GF0049383 | 0                            | 0                         | 1                            | Hypothetical protein (1)                                 | DNA repair [GO:0006281 biological_process] (1); checkpoint clamp complex [GO:0030896 cellular_component] (1); DNA damage checkpoint [GO:0000077 biological_process] (1)                                                                                                                                            | Checkpoint protein Hus1/Mec3 [IPRO07150] (1)                                                                                                                                                                    | -                               | -                            | P_trifoliata_00523_mRNA_11,1    |
| GF0049382 | 0                            | 0                         | 1                            | Hypothetical protein (1)                                 | DNA damage checkpoint [GO:0000077 biological_process] (1); checkpoint clamp complex [GO:0030896 cellular_component] (1); DNA repair [GO:0006281 biological_process] (1)                                                                                                                                            | Checkpoint protein Hus1/Mec3 [IPRO07150] (1)                                                                                                                                                                    | -                               | -                            | P_trifoliata_00523_mRNA_10,1    |
| GF0049381 | 0                            | 0                         | 1                            | Hypothetical protein (1)                                 | -                                                                                                                                                                                                                                                                                                                  | -                                                                                                                                                                                                               | -                               | -                            | P_trifoliata_00522_mRNA_9,1     |
| GF0049380 | 0                            | 0                         | 1                            | Hypothetical protein (1)                                 | transferase activity, transferring hexosyl group [GO:0016358 molecular_function] (1)                                                                                                                                                                                                                               | Glycosyl transferase, family 28, C-terminal [IPRO07235] (1)                                                                                                                                                     | -                               | -                            | P_trifoliata_00522_mRNA_16,1    |
| GF0049379 | 0                            | 0                         | 1                            | Alpha/beta fold hydrolase (1)                            | -                                                                                                                                                                                                                                                                                                                  | Alpha/Beta hydrolase fold [IPRO29058] (1)                                                                                                                                                                       | -                               | -                            | P_trifoliata_00522_mRNA_15,1    |



| ID        | Num. in <i>C. clementiae</i> | Num. in <i>C. unshii</i> | Num. in <i>P. trifoliata</i> | Note                                                                     | GO                                                                                                                                                                                                                                | InterPro                                                                                                                                                                                                                | Members in <i>C. clementiae</i> | Members in <i>C. unshii</i> | Members in <i>P. trifoliata</i> |
|-----------|------------------------------|--------------------------|------------------------------|--------------------------------------------------------------------------|-----------------------------------------------------------------------------------------------------------------------------------------------------------------------------------------------------------------------------------|-------------------------------------------------------------------------------------------------------------------------------------------------------------------------------------------------------------------------|---------------------------------|-----------------------------|---------------------------------|
| GF0049378 | 0                            | 0                        | 1                            | Hypothetical protein (1)                                                 |                                                                                                                                                                                                                                   |                                                                                                                                                                                                                         |                                 |                             | P_trifoliata_00522_mRNA_14.1    |
| GF0049377 | 0                            | 0                        | 1                            | Hypothetical protein (1)                                                 |                                                                                                                                                                                                                                   |                                                                                                                                                                                                                         |                                 |                             | P_trifoliata_00522_mRNA_13.1    |
| GF0049376 | 0                            | 0                        | 1                            | Hypothetical protein (1)                                                 |                                                                                                                                                                                                                                   |                                                                                                                                                                                                                         |                                 |                             | P_trifoliata_00522_mRNA_11.1    |
| GF0049375 | 0                            | 0                        | 1                            | Hypothetical protein (1)                                                 |                                                                                                                                                                                                                                   |                                                                                                                                                                                                                         |                                 |                             | P_trifoliata_00522_mRNA_1.1     |
| GF0049374 | 0                            | 0                        | 1                            | 2-oxoacid dehydrogenases acyltransferase (1)                             | metabolic process [GO:0008152 biological_process] (1); transferase activity, transferring acyl groups [GO:0016746 molecular_function] (1)                                                                                         | 2-oxoacid dehydrogenase acyltransferase, catalytic domain [PRO01078] (1); Chloroacetyl acyltransferase-like domain [PRO23213] (1)                                                                                       |                                 |                             | P_trifoliata_00521_mRNA_9.1     |
| GF0049373 | 0                            | 0                        | 1                            | Hypothetical protein (1)                                                 |                                                                                                                                                                                                                                   |                                                                                                                                                                                                                         |                                 |                             | P_trifoliata_00521_mRNA_8.1     |
| GF0049372 | 0                            | 0                        | 1                            | Hypothetical protein (1)                                                 |                                                                                                                                                                                                                                   |                                                                                                                                                                                                                         |                                 |                             | P_trifoliata_00521_mRNA_6.1     |
| GF0049371 | 0                            | 0                        | 1                            | Hypothetical protein (1)                                                 |                                                                                                                                                                                                                                   |                                                                                                                                                                                                                         |                                 |                             | P_trifoliata_00521_mRNA_5.1     |
| GF0049370 | 0                            | 0                        | 1                            | Hypothetical protein (1)                                                 |                                                                                                                                                                                                                                   |                                                                                                                                                                                                                         |                                 |                             | P_trifoliata_00521_mRNA_4.1     |
| GF0049369 | 0                            | 0                        | 1                            | Hypothetical protein (1)                                                 |                                                                                                                                                                                                                                   |                                                                                                                                                                                                                         |                                 |                             | P_trifoliata_00521_mRNA_3.1     |
| GF0049368 | 0                            | 0                        | 1                            | Hypothetical protein (1)                                                 |                                                                                                                                                                                                                                   |                                                                                                                                                                                                                         |                                 |                             | P_trifoliata_00521_mRNA_16.1    |
| GF0049367 | 0                            | 0                        | 1                            | Hypothetical protein (1)                                                 |                                                                                                                                                                                                                                   |                                                                                                                                                                                                                         |                                 |                             | P_trifoliata_00521_mRNA_14.1    |
| GF0049366 | 0                            | 0                        | 1                            | Mavicyanin (1)                                                           | electron carrier activity [GO:0009055 molecular_function] (1)                                                                                                                                                                     | Cupredoxin [PRO008972] (1); Phycocyanin domain [PRO00245] (1)                                                                                                                                                           |                                 |                             | P_trifoliata_00521_mRNA_12.1    |
| GF0049365 | 0                            | 0                        | 1                            | Hypothetical protein (1)                                                 | aspartic-type endopeptidase activity [GO:0004190 molecular_function] (1); proteolysis [GO:0006508 biological_process] (1)                                                                                                         | Aspartic peptidase A1 family [PRO01461] (1); Xylanase inhibitor, C-terminal [PRO32799] (1); Aspartic peptidase, active site [PRO01969] (1); Aspartic peptidase domain [PRO21109] (1)                                    |                                 |                             | P_trifoliata_00521_mRNA_11.1    |
| GF0049364 | 0                            | 0                        | 1                            | Hypothetical protein (1)                                                 |                                                                                                                                                                                                                                   |                                                                                                                                                                                                                         |                                 |                             | P_trifoliata_00519_mRNA_8.1     |
| GF0049363 | 0                            | 0                        | 1                            | Hypothetical protein (1)                                                 |                                                                                                                                                                                                                                   |                                                                                                                                                                                                                         |                                 |                             | P_trifoliata_00519_mRNA_5.1     |
| GF0049362 | 0                            | 0                        | 1                            | Hypothetical protein (1)                                                 |                                                                                                                                                                                                                                   |                                                                                                                                                                                                                         |                                 |                             | P_trifoliata_00519_mRNA_4.1     |
| GF0049361 | 0                            | 0                        | 1                            | Hypothetical protein (1)                                                 |                                                                                                                                                                                                                                   |                                                                                                                                                                                                                         |                                 |                             | P_trifoliata_00519_mRNA_3.1     |
| GF0049360 | 0                            | 0                        | 1                            | Hypothetical protein (1)                                                 |                                                                                                                                                                                                                                   |                                                                                                                                                                                                                         |                                 |                             | P_trifoliata_00519_mRNA_19.1    |
| GF0049359 | 0                            | 0                        | 1                            | Hypothetical protein (1)                                                 |                                                                                                                                                                                                                                   |                                                                                                                                                                                                                         |                                 |                             | P_trifoliata_00519_mRNA_18.1    |
| GF0049358 | 0                            | 0                        | 1                            | Hypothetical protein (1)                                                 |                                                                                                                                                                                                                                   |                                                                                                                                                                                                                         |                                 |                             | P_trifoliata_00519_mRNA_11.1    |
| GF0049357 | 0                            | 0                        | 1                            | CDNA clone:J023027G01, full insert sequence (1)                          |                                                                                                                                                                                                                                   | Rossmann-like alpha/beta/alpha sandwich fold [PRO14729] (1); Transposase, MutDR, plant [PRO04332] (1); RNA synthetase class I, catalytic domain [PRO32678] (1); Cysteine-RNA synthetase/mycothiol ligase [PRO25909] (1) |                                 |                             | P_trifoliata_00518_mRNA_3.1     |
| GF0049356 | 0                            | 0                        | 1                            | Hypothetical protein (1)                                                 |                                                                                                                                                                                                                                   |                                                                                                                                                                                                                         |                                 |                             | P_trifoliata_00518_mRNA_2.1     |
| GF0049355 | 0                            | 0                        | 1                            | AtpA (1)                                                                 |                                                                                                                                                                                                                                   |                                                                                                                                                                                                                         |                                 |                             | P_trifoliata_00518_mRNA_19.1    |
| GF0049354 | 0                            | 0                        | 1                            | Hypothetical protein (1)                                                 |                                                                                                                                                                                                                                   |                                                                                                                                                                                                                         |                                 |                             | P_trifoliata_00518_mRNA_15.1    |
| GF0049353 | 0                            | 0                        | 1                            | Hypothetical protein (1)                                                 |                                                                                                                                                                                                                                   |                                                                                                                                                                                                                         |                                 |                             | P_trifoliata_00516_mRNA_9.1     |
| GF0049352 | 0                            | 0                        | 1                            | Hypothetical protein (1)                                                 | DNA binding [GO:0003677 molecular_function] (1); transcription factor activity, sequence-specific DNA binding [GO:0003700 molecular_function] (1); regulation of transcription, DNA-templated [GO:0006355 biological_process] (1) | AP2/ERF domain [PRO01471] (1); DNA-binding domain [PRO16177] (1); Frigida-like [PRO12474] (1)                                                                                                                           |                                 |                             | P_trifoliata_00516_mRNA_19.1    |
| GF0049351 | 0                            | 0                        | 1                            | DUF4283 domain protein (1)                                               |                                                                                                                                                                                                                                   | Domain of unknown function DUF4283 [PRO25558] (1)                                                                                                                                                                       |                                 |                             | P_trifoliata_00516_mRNA_14.1    |
| GF0049350 | 0                            | 0                        | 1                            | Ribonuclease H-like superfamily protein (1)                              |                                                                                                                                                                                                                                   | Reverse transcriptase zinc-binding domain [PRO26960] (1)                                                                                                                                                                |                                 |                             | P_trifoliata_00516_mRNA_13.1    |
| GF0049349 | 0                            | 0                        | 1                            | Hypothetical protein (1)                                                 |                                                                                                                                                                                                                                   |                                                                                                                                                                                                                         |                                 |                             | P_trifoliata_00515_mRNA_9.1     |
| GF0049348 | 0                            | 0                        | 1                            | Ribonuclease H (1)                                                       | RNA-DNA hybrid ribonuclease activity [GO:0004523 molecular_function] (1); nucleic acid binding [GO:0003676 molecular_function] (1)                                                                                                | Ribonuclease H domain [PRO02156] (1); Ribonuclease H-like domain [PRO12337] (1)                                                                                                                                         |                                 |                             | P_trifoliata_00515_mRNA_8.1     |
| GF0049347 | 0                            | 0                        | 1                            | Hypothetical protein (1)                                                 |                                                                                                                                                                                                                                   |                                                                                                                                                                                                                         |                                 |                             | P_trifoliata_00515_mRNA_7.1     |
| GF0049346 | 0                            | 0                        | 1                            | Hypothetical protein (1)                                                 |                                                                                                                                                                                                                                   |                                                                                                                                                                                                                         |                                 |                             | P_trifoliata_00515_mRNA_4.1     |
| GF0049345 | 0                            | 0                        | 1                            | Hypothetical protein (1)                                                 |                                                                                                                                                                                                                                   |                                                                                                                                                                                                                         |                                 |                             | P_trifoliata_00514_mRNA_3.1     |
| GF0049344 | 0                            | 0                        | 1                            | Hypothetical protein (1)                                                 |                                                                                                                                                                                                                                   |                                                                                                                                                                                                                         |                                 |                             | P_trifoliata_00514_mRNA_2.1     |
| GF0049343 | 0                            | 0                        | 1                            | Hypothetical protein (1)                                                 |                                                                                                                                                                                                                                   |                                                                                                                                                                                                                         |                                 |                             | P_trifoliata_00514_mRNA_1.1     |
| GF0049342 | 0                            | 0                        | 1                            | Hypothetical protein (1)                                                 |                                                                                                                                                                                                                                   |                                                                                                                                                                                                                         |                                 |                             | P_trifoliata_00513_mRNA_6.1     |
| GF0049341 | 0                            | 0                        | 1                            | Hypothetical protein (1)                                                 |                                                                                                                                                                                                                                   |                                                                                                                                                                                                                         |                                 |                             | P_trifoliata_00513_mRNA_2.1     |
| GF0049340 | 0                            | 0                        | 1                            | Hypothetical protein (1)                                                 |                                                                                                                                                                                                                                   |                                                                                                                                                                                                                         |                                 |                             | P_trifoliata_00513_mRNA_2.1     |
| GF0049339 | 0                            | 0                        | 1                            | Transposon protein, putative, unclassified, expressed (1)                | regulation of transcription, DNA-templated [GO:0006355 biological_process] (1)                                                                                                                                                    | MULE transposase domain [PRO182809] (1); FHY3/FAR1 family [PRO31052] (1)                                                                                                                                                |                                 |                             | P_trifoliata_00513_mRNA_20.1    |
| GF0049338 | 0                            | 0                        | 1                            | Hypothetical protein (1)                                                 |                                                                                                                                                                                                                                   |                                                                                                                                                                                                                         |                                 |                             | P_trifoliata_00513_mRNA_19.1    |
| GF0049337 | 0                            | 0                        | 1                            | Hypothetical protein (1)                                                 |                                                                                                                                                                                                                                   |                                                                                                                                                                                                                         |                                 |                             | P_trifoliata_00513_mRNA_1.1     |
| GF0049336 | 0                            | 0                        | 1                            | Hypothetical protein (1)                                                 |                                                                                                                                                                                                                                   | Protein of unknown function DUF616 [PRO06852] (1)                                                                                                                                                                       |                                 |                             | P_trifoliata_00512_mRNA_8.1     |
| GF0049335 | 0                            | 0                        | 1                            | Hypothetical protein (1)                                                 |                                                                                                                                                                                                                                   |                                                                                                                                                                                                                         |                                 |                             | P_trifoliata_00512_mRNA_24.1    |
| GF0049334 | 0                            | 0                        | 1                            | Hypothetical protein (1)                                                 |                                                                                                                                                                                                                                   | Glutathione S-transferase, C-terminal [PRO04045] (1); Glutathione S-transferase, C-terminal-like [PRO10987] (1)                                                                                                         |                                 |                             | P_trifoliata_00512_mRNA_22.1    |
| GF0049333 | 0                            | 0                        | 1                            | Glutathione transferase (1)                                              | protein binding [GO:0005515 molecular_function] (1)                                                                                                                                                                               | Thioredoxin-like fold [PRO12336] (1); Glutathione S-transferase, N-terminal [PRO04045] (1); Glutathione S-transferase, C-terminal-like [PRO10987] (1)                                                                   |                                 |                             | P_trifoliata_00512_mRNA_21.1    |
| GF0049332 | 0                            | 0                        | 1                            | Glutathione transferase (1)                                              | protein binding [GO:0005515 molecular_function] (1)                                                                                                                                                                               | Thioredoxin-like fold [PRO12336] (1); Glutathione S-transferase, N-terminal [PRO04045] (1); Glutathione S-transferase, C-terminal-like [PRO10987] (1)                                                                   |                                 |                             | P_trifoliata_00512_mRNA_20.1    |
| GF0049331 | 0                            | 0                        | 1                            | Hypothetical protein (1)                                                 | nucleic acid binding [GO:0003676 molecular_function] (1)                                                                                                                                                                          | Ribonuclease H-like domain [PRO12337] (1)                                                                                                                                                                               |                                 |                             | P_trifoliata_00511_mRNA_7.1     |
| GF0049330 | 0                            | 0                        | 1                            | Hypothetical protein (1)                                                 | catalytic activity [GO:0003824 molecular_function] (1); transaminase activity [GO:0008483 molecular_function] (1); pyridoxal phosphate binding [GO:0001070 molecular_function] (1)                                                | Pyridoxal phosphate-dependent transferase [PRO15424] (1); Aminotransferase class-II [PRO05814] (1); Pyridoxal phosphate-dependent transferase, major region, subdomain 2 [PRO15422] (1)                                 |                                 |                             | P_trifoliata_00511_mRNA_5.1     |
| GF0049329 | 0                            | 0                        | 1                            | Hypothetical protein (1)                                                 |                                                                                                                                                                                                                                   |                                                                                                                                                                                                                         |                                 |                             | P_trifoliata_00511_mRNA_4.1     |
| GF0049328 | 0                            | 0                        | 1                            | Hypothetical protein (1)                                                 |                                                                                                                                                                                                                                   |                                                                                                                                                                                                                         |                                 |                             | P_trifoliata_00511_mRNA_2.1     |
| GF0049327 | 0                            | 0                        | 1                            | Hypothetical protein (1)                                                 |                                                                                                                                                                                                                                   |                                                                                                                                                                                                                         |                                 |                             | P_trifoliata_00510_mRNA_8.1     |
| GF0049326 | 0                            | 0                        | 1                            | Hypothetical protein (1)                                                 |                                                                                                                                                                                                                                   |                                                                                                                                                                                                                         |                                 |                             | P_trifoliata_00509_mRNA_9.1     |
| GF0049325 | 0                            | 0                        | 1                            | Hypothetical protein (1)                                                 |                                                                                                                                                                                                                                   |                                                                                                                                                                                                                         |                                 |                             | P_trifoliata_00509_mRNA_7.1     |
| GF0049324 | 0                            | 0                        | 1                            | Hypothetical protein (1)                                                 |                                                                                                                                                                                                                                   |                                                                                                                                                                                                                         |                                 |                             | P_trifoliata_00509_mRNA_6.1     |
| GF0049323 | 0                            | 0                        | 1                            | Hypothetical protein (1)                                                 |                                                                                                                                                                                                                                   |                                                                                                                                                                                                                         |                                 |                             | P_trifoliata_00509_mRNA_5.1     |
| GF0049322 | 0                            | 0                        | 1                            | Hypothetical protein (1)                                                 |                                                                                                                                                                                                                                   |                                                                                                                                                                                                                         |                                 |                             | P_trifoliata_00509_mRNA_4.1     |
| GF0049321 | 0                            | 0                        | 1                            | Hypothetical protein (1)                                                 |                                                                                                                                                                                                                                   | Domain of unknown function DUF4283 [PRO25558] (1)                                                                                                                                                                       |                                 |                             | P_trifoliata_00509_mRNA_3.1     |
| GF0049320 | 0                            | 0                        | 1                            | Hypothetical protein (1)                                                 |                                                                                                                                                                                                                                   |                                                                                                                                                                                                                         |                                 |                             | P_trifoliata_00509_mRNA_2.1     |
| GF0049319 | 0                            | 0                        | 1                            | Polynucleotidyl transferase, ribonuclease H-like superfamily protein (1) | nucleic acid binding [GO:0003676 molecular_function] (1)                                                                                                                                                                          | Ribonuclease H-like domain [PRO12337] (1); Reverse transcriptase zinc-binding domain [PRO26960] (1)                                                                                                                     |                                 |                             | P_trifoliata_00509_mRNA_17.1    |
| GF0049318 | 0                            | 0                        | 1                            | Hypothetical protein (1)                                                 |                                                                                                                                                                                                                                   |                                                                                                                                                                                                                         |                                 |                             | P_trifoliata_00509_mRNA_11.1    |
| GF0049317 | 0                            | 0                        | 1                            | Hypothetical protein (1)                                                 |                                                                                                                                                                                                                                   |                                                                                                                                                                                                                         |                                 |                             | P_trifoliata_00508_mRNA_8.1     |
| GF0049316 | 0                            | 0                        | 1                            | Hypothetical protein (1)                                                 |                                                                                                                                                                                                                                   |                                                                                                                                                                                                                         |                                 |                             | P_trifoliata_00508_mRNA_5.1     |
| GF0049315 | 0                            | 0                        | 1                            | Hypothetical protein (1)                                                 |                                                                                                                                                                                                                                   |                                                                                                                                                                                                                         |                                 |                             | P_trifoliata_00508_mRNA_4.1     |
| GF0049314 | 0                            | 0                        | 1                            | Hypothetical protein (1)                                                 |                                                                                                                                                                                                                                   |                                                                                                                                                                                                                         |                                 |                             | P_trifoliata_00508_mRNA_14.1    |
| GF0049313 | 0                            | 0                        | 1                            | Hypothetical protein (1)                                                 | aspartic-type endopeptidase activity [GO:0004190 molecular_function] (1); proteolysis [GO:0006508 biological_process] (1)                                                                                                         | Aspartic peptidase, active site [PRO01969] (1)                                                                                                                                                                          |                                 |                             | P_trifoliata_00508_mRNA_13.1    |
| GF0049312 | 0                            | 0                        | 1                            | Hypothetical protein (1)                                                 |                                                                                                                                                                                                                                   |                                                                                                                                                                                                                         |                                 |                             | P_trifoliata_00508_mRNA_12.1    |
| GF0049311 | 0                            | 0                        | 1                            | Hypothetical protein (1)                                                 |                                                                                                                                                                                                                                   | Thaumatin [PRO01938] (1)                                                                                                                                                                                                |                                 |                             | P_trifoliata_00507_mRNA_4.1     |
| GF0049310 | 0                            | 0                        | 1                            | Hypothetical protein (1)                                                 |                                                                                                                                                                                                                                   |                                                                                                                                                                                                                         |                                 |                             | P_trifoliata_00507_mRNA_3.1     |
| GF0049309 | 0                            | 0                        | 1                            | Hypothetical protein (1)                                                 | RNA binding [GO:0003723 molecular_function] (1)                                                                                                                                                                                   | YTH domain [PRO07275] (1)                                                                                                                                                                                               |                                 |                             | P_trifoliata_00507_mRNA_2.1     |
| GF0049308 | 0                            | 0                        | 1                            | GATA transcription factor 9 (1)                                          |                                                                                                                                                                                                                                   |                                                                                                                                                                                                                         |                                 |                             | P_trifoliata_00507_mRNA_14.1    |
| GF0049307 | 0                            | 0                        | 1                            | Hypothetical protein (1)                                                 |                                                                                                                                                                                                                                   |                                                                                                                                                                                                                         |                                 |                             | P_trifoliata_00507_mRNA_1.1     |
| GF0049306 | 0                            | 0                        | 1                            | Hypothetical protein (1)                                                 |                                                                                                                                                                                                                                   |                                                                                                                                                                                                                         |                                 |                             | P_trifoliata_00505_mRNA_13.1    |
| GF0049305 | 0                            | 0                        | 1                            | Hypothetical protein (1)                                                 |                                                                                                                                                                                                                                   |                                                                                                                                                                                                                         |                                 |                             | P_trifoliata_00505_mRNA_1.1     |
| GF0049304 | 0                            | 0                        | 1                            | Hypothetical protein (1)                                                 |                                                                                                                                                                                                                                   | Viral movement protein [PRO28919] (1)                                                                                                                                                                                   |                                 |                             | P_trifoliata_00504_mRNA_9.1     |
| GF0049303 | 0                            | 0                        | 1                            | Hypothetical protein (1)                                                 |                                                                                                                                                                                                                                   |                                                                                                                                                                                                                         |                                 |                             | P_trifoliata_00504_mRNA_8.1     |
| GF0049302 | 0                            | 0                        | 1                            | Hypothetical protein (1)                                                 |                                                                                                                                                                                                                                   |                                                                                                                                                                                                                         |                                 |                             | P_trifoliata_00504_mRNA_7.1     |
| GF0049301 | 0                            | 0                        | 1                            | Hypothetical protein (1)                                                 | zinc ion binding [GO:0008270 molecular_function] (1); nucleic acid binding [GO:0003676 molecular_function] (1)                                                                                                                    | Zinc finger, CCHC-type [PRO01878] (1)                                                                                                                                                                                   |                                 |                             | P_trifoliata_00504_mRNA_6.1     |
| GF0049300 | 0                            | 0                        | 1                            | Hypothetical protein (1)                                                 |                                                                                                                                                                                                                                   |                                                                                                                                                                                                                         |                                 |                             | P_trifoliata_00504_mRNA_4.1     |
| GF0049299 | 0                            | 0                        | 1                            | Hypothetical protein (1)                                                 |                                                                                                                                                                                                                                   |                                                                                                                                                                                                                         |                                 |                             | P_trifoliata_00504_mRNA_3.1     |
| GF0049298 | 0                            | 0                        | 1                            | Hypothetical protein (1)                                                 |                                                                                                                                                                                                                                   |                                                                                                                                                                                                                         |                                 |                             | P_trifoliata_00504_mRNA_18.1    |
| GF0049297 | 0                            | 0                        | 1                            | Hypothetical protein (1)                                                 |                                                                                                                                                                                                                                   | Probable transposase, Pita/Ea/Spm, plant [PRO04252] (1)                                                                                                                                                                 |                                 |                             | P_trifoliata_00504_mRNA_17.1    |
| GF0049296 | 0                            | 0                        | 1                            | Hypothetical protein (1)                                                 |                                                                                                                                                                                                                                   |                                                                                                                                                                                                                         |                                 |                             | P_trifoliata_00504_mRNA_16.1    |

| ID        | Num. in <i>C. clementiae</i> | Num. in <i>C. canthii</i> | Num. in <i>P. trifoliata</i> | Note                                                                 | GO                                                                                                                                                                                                                       | InterPro                                                                                                                                                                                                                                                                                                                                  | Members in <i>C. clementiae</i> | Members in <i>C. canthii</i> | Members in <i>P. trifoliata</i> |
|-----------|------------------------------|---------------------------|------------------------------|----------------------------------------------------------------------|--------------------------------------------------------------------------------------------------------------------------------------------------------------------------------------------------------------------------|-------------------------------------------------------------------------------------------------------------------------------------------------------------------------------------------------------------------------------------------------------------------------------------------------------------------------------------------|---------------------------------|------------------------------|---------------------------------|
| GF0049295 | 0                            | 0                         | 1                            | Hypothetical protein (1)                                             |                                                                                                                                                                                                                          |                                                                                                                                                                                                                                                                                                                                           |                                 |                              | P_trifoliata_00504_mRNA_10.1    |
| GF0049294 | 0                            | 0                         | 1                            | Hypothetical protein (1)                                             |                                                                                                                                                                                                                          |                                                                                                                                                                                                                                                                                                                                           |                                 |                              | P_trifoliata_00504_mRNA_1.1     |
| GF0049293 | 0                            | 0                         | 1                            | Gag protease polyprotein (1)                                         |                                                                                                                                                                                                                          | Viral movement protein [IPRO28919] (1); Retroviral asparyl protease [IPRO13242] (1); Retrotransposon gag domain [IPRO05162] (1)                                                                                                                                                                                                           |                                 |                              | P_trifoliata_00503_mRNA_9.1     |
| GF0049292 | 0                            | 0                         | 1                            | Hypothetical protein (1)                                             |                                                                                                                                                                                                                          |                                                                                                                                                                                                                                                                                                                                           |                                 |                              | P_trifoliata_00503_mRNA_6.1     |
| GF0049291 | 0                            | 0                         | 1                            | Hypothetical protein (1)                                             |                                                                                                                                                                                                                          |                                                                                                                                                                                                                                                                                                                                           |                                 |                              | P_trifoliata_00503_mRNA_5.1     |
| GF0049290 | 0                            | 0                         | 1                            | Hypothetical protein (1)                                             | protein dimerization activity [GO:004983 molecular_function] (1); nucleic acid binding [GO:0003676 molecular_function] (1)                                                                                               | Ribonuclease H-like domain [IPRO12337] (1); HAT, C-terminal dimerization domain [IPRO08906] (1)                                                                                                                                                                                                                                           |                                 |                              | P_trifoliata_00503_mRNA_12.1    |
| GF0049289 | 0                            | 0                         | 1                            | Hypothetical protein (1)                                             |                                                                                                                                                                                                                          |                                                                                                                                                                                                                                                                                                                                           |                                 |                              | P_trifoliata_00503_mRNA_11.1    |
| GF0049288 | 0                            | 0                         | 1                            | Hypothetical protein (1)                                             |                                                                                                                                                                                                                          |                                                                                                                                                                                                                                                                                                                                           |                                 |                              | P_trifoliata_00503_mRNA_10.1    |
| GF0049287 | 0                            | 0                         | 1                            | 50S ribosomal protein L1 (1)                                         | RNA binding [GO:0003723 molecular_function] (1)                                                                                                                                                                          | Ribosomal protein L1-like [IPRO23674] (1); Ribosomal protein L1, 3-layer alpha-beta-sandwich [IPRO16095] (1); Ribosomal protein L1, 2-layer alpha-beta-sandwich [IPRO16094] (1); Ribosomal protein L1/ribosomal biogenesis protein [IPRO28364] (1)                                                                                        |                                 |                              | P_trifoliata_00502_mRNA_33.1    |
| GF0049286 | 0                            | 0                         | 1                            | Hypothetical protein (1)                                             |                                                                                                                                                                                                                          |                                                                                                                                                                                                                                                                                                                                           |                                 |                              | P_trifoliata_00502_mRNA_27.1    |
| GF0049285 | 0                            | 0                         | 1                            | Selenoprotein K (1)                                                  |                                                                                                                                                                                                                          | Selenoprotein Sdk/ScK [IPRO24491] (1)                                                                                                                                                                                                                                                                                                     |                                 |                              | P_trifoliata_00502_mRNA_13.1    |
| GF0049284 | 0                            | 0                         | 1                            | Hypothetical protein (1)                                             |                                                                                                                                                                                                                          |                                                                                                                                                                                                                                                                                                                                           |                                 |                              | P_trifoliata_00501_mRNA_4.1     |
| GF0049283 | 0                            | 0                         | 1                            | Hypothetical protein (1)                                             |                                                                                                                                                                                                                          |                                                                                                                                                                                                                                                                                                                                           |                                 |                              | P_trifoliata_00501_mRNA_27.1    |
| GF0049282 | 0                            | 0                         | 1                            | Hypothetical protein (1)                                             |                                                                                                                                                                                                                          |                                                                                                                                                                                                                                                                                                                                           |                                 |                              | P_trifoliata_00501_mRNA_26.1    |
| GF0049281 | 0                            | 0                         | 1                            | Hypothetical protein (1)                                             |                                                                                                                                                                                                                          |                                                                                                                                                                                                                                                                                                                                           |                                 |                              | P_trifoliata_00501_mRNA_1.1     |
| GF0049280 | 0                            | 0                         | 1                            | Hypothetical protein (1)                                             | structural constituent of ribosome [GO:0003735 molecular_function] (1); intracellular [GO:0005622 cellular_component] (1); translation [GO:0006412 biological_process] (1); ribosome [GO:0005840 cellular_component] (1) | Ribosomal protein L34Ae [IPRO08195] (1); Protein of unknown function DUF1666 [IPRO12870] (1)                                                                                                                                                                                                                                              |                                 |                              | P_trifoliata_00500_mRNA_4.1     |
| GF0049279 | 0                            | 0                         | 1                            | Receptor-like kinase plant (1)                                       | protein phosphorylation [GO:0006468 biological_process] (1); protein kinase activity [GO:0004872 molecular_function] (1); ATP binding [GO:0005524 molecular_function] (1)                                                | Serine/threonine/tyrosine-protein kinase catalytic domain [IPRO1245] (1); Protein kinase, ATP binding site [IPRO17441] (1); Serine/threonine-protein kinase, active site [IPRO08271] (1); Concavallin A-like lectin-glycosylase domain [IPRO13320] (1); Protein kinase-like domain [IPRO11009] (1); Protein kinase domain [IPRO00719] (1) |                                 |                              | P_trifoliata_00500_mRNA_20.1    |
| GF0049278 | 0                            | 0                         | 1                            | Hypothetical protein (1)                                             |                                                                                                                                                                                                                          |                                                                                                                                                                                                                                                                                                                                           |                                 |                              | P_trifoliata_00499_mRNA_9.1     |
| GF0049277 | 0                            | 0                         | 1                            | Hypothetical protein (1)                                             | nucleic acid binding [GO:0003676 molecular_function] (1)                                                                                                                                                                 | Ribonuclease H-like domain [IPRO12337] (1)                                                                                                                                                                                                                                                                                                |                                 |                              | P_trifoliata_00499_mRNA_7.1     |
| GF0049276 | 0                            | 0                         | 1                            | Hypothetical protein (1)                                             |                                                                                                                                                                                                                          |                                                                                                                                                                                                                                                                                                                                           |                                 |                              | P_trifoliata_00499_mRNA_5.1     |
| GF0049275 | 0                            | 0                         | 1                            | Hypothetical protein (1)                                             |                                                                                                                                                                                                                          |                                                                                                                                                                                                                                                                                                                                           |                                 |                              | P_trifoliata_00499_mRNA_4.1     |
| GF0049274 | 0                            | 0                         | 1                            | Hypothetical protein (1)                                             |                                                                                                                                                                                                                          |                                                                                                                                                                                                                                                                                                                                           |                                 |                              | P_trifoliata_00499_mRNA_3.1     |
| GF0049273 | 0                            | 0                         | 1                            | Hypothetical protein (1)                                             |                                                                                                                                                                                                                          |                                                                                                                                                                                                                                                                                                                                           |                                 |                              | P_trifoliata_00499_mRNA_2.1     |
| GF0049272 | 0                            | 0                         | 1                            | Hypothetical protein (1)                                             |                                                                                                                                                                                                                          |                                                                                                                                                                                                                                                                                                                                           |                                 |                              | P_trifoliata_00499_mRNA_11.1    |
| GF0049271 | 0                            | 0                         | 1                            | Hypothetical protein (1)                                             |                                                                                                                                                                                                                          |                                                                                                                                                                                                                                                                                                                                           |                                 |                              | P_trifoliata_00499_mRNA_10.1    |
| GF0049270 | 0                            | 0                         | 1                            | Hypothetical protein (1)                                             |                                                                                                                                                                                                                          |                                                                                                                                                                                                                                                                                                                                           |                                 |                              | P_trifoliata_00498_mRNA_7.1     |
| GF0049269 | 0                            | 0                         | 1                            | Hypothetical protein (1)                                             |                                                                                                                                                                                                                          |                                                                                                                                                                                                                                                                                                                                           |                                 |                              | P_trifoliata_00498_mRNA_6.1     |
| GF0049268 | 0                            | 0                         | 1                            | Hypothetical protein (1)                                             |                                                                                                                                                                                                                          |                                                                                                                                                                                                                                                                                                                                           |                                 |                              | P_trifoliata_00498_mRNA_5.1     |
| GF0049267 | 0                            | 0                         | 1                            | Hypothetical protein (1)                                             |                                                                                                                                                                                                                          |                                                                                                                                                                                                                                                                                                                                           |                                 |                              | P_trifoliata_00498_mRNA_4.1     |
| GF0049266 | 0                            | 0                         | 1                            | Hypothetical protein (1)                                             |                                                                                                                                                                                                                          |                                                                                                                                                                                                                                                                                                                                           |                                 |                              | P_trifoliata_00498_mRNA_18.1    |
| GF0049265 | 0                            | 0                         | 1                            | Hypothetical protein (1)                                             |                                                                                                                                                                                                                          |                                                                                                                                                                                                                                                                                                                                           |                                 |                              | P_trifoliata_00498_mRNA_14.1    |
| GF0049264 | 0                            | 0                         | 1                            | Hypothetical protein (1)                                             |                                                                                                                                                                                                                          |                                                                                                                                                                                                                                                                                                                                           |                                 |                              | P_trifoliata_00498_mRNA_11.1    |
| GF0049263 | 0                            | 0                         | 1                            | Hypothetical protein (1)                                             |                                                                                                                                                                                                                          |                                                                                                                                                                                                                                                                                                                                           |                                 |                              | P_trifoliata_00498_mRNA_10.1    |
| GF0049262 | 0                            | 0                         | 1                            | Hypothetical protein (1)                                             |                                                                                                                                                                                                                          |                                                                                                                                                                                                                                                                                                                                           |                                 |                              | P_trifoliata_00497_mRNA_9.1     |
| GF0049261 | 0                            | 0                         | 1                            | Hypothetical protein (1)                                             |                                                                                                                                                                                                                          | Reverse transcriptase, RNA-dependent DNA polymerase [IPRO13103] (1)                                                                                                                                                                                                                                                                       |                                 |                              | P_trifoliata_00497_mRNA_3.1     |
| GF0049260 | 0                            | 0                         | 1                            | Hypothetical protein (1)                                             |                                                                                                                                                                                                                          | Gag-polyprotein of LTR copia-type [IPRO29472] (1)                                                                                                                                                                                                                                                                                         |                                 |                              | P_trifoliata_00497_mRNA_2.1     |
| GF0049259 | 0                            | 0                         | 1                            | Hypothetical protein (1)                                             |                                                                                                                                                                                                                          | Endonuclease/coumestrol-phosphatase [IPRO05135] (1)                                                                                                                                                                                                                                                                                       |                                 |                              | P_trifoliata_00497_mRNA_16.1    |
| GF0049258 | 0                            | 0                         | 1                            | Disease resistance protein (1)                                       | ADP binding [GO:004531 molecular_function] (1)                                                                                                                                                                           | P-loop containing nucleoside triphosphate hydrolase [IPRO27417] (1); AAA+ ATPase domain [IPRO03593] (1); NB-ARC [IPRO02182] (1)                                                                                                                                                                                                           |                                 |                              | P_trifoliata_00497_mRNA_14.1    |
| GF0049257 | 0                            | 0                         | 1                            | Hypothetical protein (1)                                             |                                                                                                                                                                                                                          |                                                                                                                                                                                                                                                                                                                                           |                                 |                              | P_trifoliata_00497_mRNA_1.1     |
| GF0049256 | 0                            | 0                         | 1                            | Hypothetical protein (1)                                             |                                                                                                                                                                                                                          |                                                                                                                                                                                                                                                                                                                                           |                                 |                              | P_trifoliata_00496_mRNA_8.1     |
| GF0049255 | 0                            | 0                         | 1                            | Hypothetical protein (1)                                             |                                                                                                                                                                                                                          |                                                                                                                                                                                                                                                                                                                                           |                                 |                              | P_trifoliata_00496_mRNA_5.1     |
| GF0049254 | 0                            | 0                         | 1                            | Hypothetical protein (1)                                             |                                                                                                                                                                                                                          |                                                                                                                                                                                                                                                                                                                                           |                                 |                              | P_trifoliata_00496_mRNA_4.1     |
| GF0049253 | 0                            | 0                         | 1                            | Hypothetical protein (1)                                             |                                                                                                                                                                                                                          |                                                                                                                                                                                                                                                                                                                                           |                                 |                              | P_trifoliata_00496_mRNA_18.1    |
| GF0049252 | 0                            | 0                         | 1                            | Hypothetical protein (1)                                             |                                                                                                                                                                                                                          |                                                                                                                                                                                                                                                                                                                                           |                                 |                              | P_trifoliata_00496_mRNA_17.1    |
| GF0049251 | 0                            | 0                         | 1                            | Cytokinin riboside 5'-monophosphate phosphoribohydrolase (1)         |                                                                                                                                                                                                                          | LOG family [IPRO3100] (1)                                                                                                                                                                                                                                                                                                                 |                                 |                              | P_trifoliata_00496_mRNA_16.1    |
| GF0049250 | 0                            | 0                         | 1                            | Hypothetical protein (1)                                             |                                                                                                                                                                                                                          |                                                                                                                                                                                                                                                                                                                                           |                                 |                              | P_trifoliata_00496_mRNA_15.1    |
| GF0049249 | 0                            | 0                         | 1                            | Leucine-rich repeat, typical subtype (1)                             |                                                                                                                                                                                                                          | Leucine-rich repeat domain, L domain-like [IPRO32675] (1)                                                                                                                                                                                                                                                                                 |                                 |                              | P_trifoliata_00496_mRNA_13.1    |
| GF0049248 | 0                            | 0                         | 1                            | Hypothetical protein (1)                                             |                                                                                                                                                                                                                          |                                                                                                                                                                                                                                                                                                                                           |                                 |                              | P_trifoliata_00496_mRNA_12.1    |
| GF0049247 | 0                            | 0                         | 1                            | Hypothetical protein (1)                                             |                                                                                                                                                                                                                          |                                                                                                                                                                                                                                                                                                                                           |                                 |                              | P_trifoliata_00496_mRNA_10.1    |
| GF0049246 | 0                            | 0                         | 1                            | Hypothetical protein (1)                                             |                                                                                                                                                                                                                          |                                                                                                                                                                                                                                                                                                                                           |                                 |                              | P_trifoliata_00495_mRNA_5.1     |
| GF0049245 | 0                            | 0                         | 1                            | Hypothetical protein (1)                                             | protein binding [GO:0005515 molecular_function] (1)                                                                                                                                                                      | Leucine-rich repeat domain, L domain-like [IPRO32675] (1); Leucine-rich repeat [IPRO1611] (1)                                                                                                                                                                                                                                             |                                 |                              | P_trifoliata_00495_mRNA_16.1    |
| GF0049244 | 0                            | 0                         | 1                            | Hypothetical protein (1)                                             | ATP binding [GO:0005524 molecular_function] (1)                                                                                                                                                                          | P-loop containing nucleoside triphosphate hydrolase [IPRO27417] (1); ATPase, AAA-type, core [IPRO03959] (1); AAA+ ATPase domain [IPRO03593] (1)                                                                                                                                                                                           |                                 |                              | P_trifoliata_00494_mRNA_6.1     |
| GF0049243 | 0                            | 0                         | 1                            | Hypothetical protein (1)                                             |                                                                                                                                                                                                                          |                                                                                                                                                                                                                                                                                                                                           |                                 |                              | P_trifoliata_00494_mRNA_5.1     |
| GF0049242 | 0                            | 0                         | 1                            | Hypothetical protein (1)                                             |                                                                                                                                                                                                                          | Amino acid transporter, transmembrane domain [IPRO15071] (1); FAR1 DNA binding domain [IPRO04330] (1)                                                                                                                                                                                                                                     |                                 |                              | P_trifoliata_00494_mRNA_24.1    |
| GF0049241 | 0                            | 0                         | 1                            | Hypothetical protein (1)                                             | protein binding [GO:0005515 molecular_function] (1)                                                                                                                                                                      | Sec3 domain [IPRO04179] (1); C2 domain [IPRO06080] (1); Immunoglobulin E-set [IPRO14756] (1)                                                                                                                                                                                                                                              |                                 |                              | P_trifoliata_00494_mRNA_2.1     |
| GF0049240 | 0                            | 0                         | 1                            | Uridine diphosphate glycosyltransferase 74E2, putative isoform 1 (1) | biological_process [GO:0008152 metabolic_process] (1); transferase activity, transferring hexosyl groups [GO:0016758 molecular_function] (1)                                                                             | UDP-glucuronosyl/UDP-glucosyltransferase [IPRO02213] (1)                                                                                                                                                                                                                                                                                  |                                 |                              | P_trifoliata_00494_mRNA_15.1    |
| GF0049239 | 0                            | 0                         | 1                            | Hypothetical protein (1)                                             |                                                                                                                                                                                                                          |                                                                                                                                                                                                                                                                                                                                           |                                 |                              | P_trifoliata_00494_mRNA_1.1     |
| GF0049238 | 0                            | 0                         | 1                            | Hypothetical protein (1)                                             |                                                                                                                                                                                                                          |                                                                                                                                                                                                                                                                                                                                           |                                 |                              | P_trifoliata_00493_mRNA_9.1     |
| GF0049237 | 0                            | 0                         | 1                            | Hypothetical protein (1)                                             |                                                                                                                                                                                                                          | Leucine-rich repeat domain, L domain-like [IPRO32675] (1)                                                                                                                                                                                                                                                                                 |                                 |                              | P_trifoliata_00493_mRNA_8.1     |
| GF0049236 | 0                            | 0                         | 1                            | Hypothetical leucine rich repeat protein (1)                         | protein binding [GO:0005515 molecular_function] (1)                                                                                                                                                                      | Leucine-rich repeat, typical subtype [IPRO03591] (1); Leucine-rich repeat domain, L domain-like [IPRO32675] (1); Leucine-rich repeat [IPRO1611] (1)                                                                                                                                                                                       |                                 |                              | P_trifoliata_00493_mRNA_3.1     |
| GF0049235 | 0                            | 0                         | 1                            | Hypothetical protein (1)                                             |                                                                                                                                                                                                                          |                                                                                                                                                                                                                                                                                                                                           |                                 |                              | P_trifoliata_00493_mRNA_2.1     |
| GF0049234 | 0                            | 0                         | 1                            | Hypothetical protein (1)                                             |                                                                                                                                                                                                                          |                                                                                                                                                                                                                                                                                                                                           |                                 |                              | P_trifoliata_00493_mRNA_17.1    |
| GF0049233 | 0                            | 0                         | 1                            | Hypothetical protein (1)                                             |                                                                                                                                                                                                                          |                                                                                                                                                                                                                                                                                                                                           |                                 |                              | P_trifoliata_00493_mRNA_16.1    |
| GF0049232 | 0                            | 0                         | 1                            | Hypothetical protein (1)                                             | DNA binding [GO:0003677 molecular_function] (1)                                                                                                                                                                          | Zinc finger, BED-type [IPRO03656] (1)                                                                                                                                                                                                                                                                                                     |                                 |                              | P_trifoliata_00493_mRNA_12.1    |
| GF0049231 | 0                            | 0                         | 1                            | Hypothetical protein (1)                                             |                                                                                                                                                                                                                          | Retrotransposon gag domain [IPRO05162] (1)                                                                                                                                                                                                                                                                                                |                                 |                              | P_trifoliata_00492_mRNA_4.1     |
| GF0049230 | 0                            | 0                         | 1                            | Hypothetical protein (1)                                             |                                                                                                                                                                                                                          |                                                                                                                                                                                                                                                                                                                                           |                                 |                              | P_trifoliata_00492_mRNA_20.1    |
| GF0049229 | 0                            | 0                         | 1                            | Hypothetical protein (1)                                             |                                                                                                                                                                                                                          |                                                                                                                                                                                                                                                                                                                                           |                                 |                              | P_trifoliata_00492_mRNA_18.1    |
| GF0049228 | 0                            | 0                         | 1                            | Mutator-like transposase (1)                                         |                                                                                                                                                                                                                          | Transposase, MuDR, plant [IPRO04332] (1); MULE transposase domain [IPRO18289] (1)                                                                                                                                                                                                                                                         |                                 |                              | P_trifoliata_00492_mRNA_17.1    |
| GF0049227 | 0                            | 0                         | 1                            | Hypothetical protein (1)                                             |                                                                                                                                                                                                                          |                                                                                                                                                                                                                                                                                                                                           |                                 |                              | P_trifoliata_00492_mRNA_16.1    |
| GF0049226 | 0                            | 0                         | 1                            | Hypothetical protein (1)                                             | nucleic acid binding [GO:0003676 molecular_function] (1)                                                                                                                                                                 | Ribonuclease H-like domain [IPRO12337] (1)                                                                                                                                                                                                                                                                                                |                                 |                              | P_trifoliata_00492_mRNA_1.1     |
| GF0049225 | 0                            | 0                         | 1                            | Lipid phosphate phosphatase-like protein (1)                         |                                                                                                                                                                                                                          | Lipid phosphate phosphatase, plant [IPRO23683] (1); Phosphatidic acid phosphatase type 2/haloperoxidase [IPRO00326] (1)                                                                                                                                                                                                                   |                                 |                              | P_trifoliata_00491_mRNA_24.1    |
| GF0049224 | 0                            | 0                         | 1                            | Hypothetical protein (1)                                             | protein dimerization activity [GO:004983 molecular_function] (1)                                                                                                                                                         | Myo-type, basic helix-loop-helix (bHLH) domain [IPRO11598] (1)                                                                                                                                                                                                                                                                            |                                 |                              | P_trifoliata_00491_mRNA_15.1    |
| GF0049223 | 0                            | 0                         | 1                            | Hypothetical protein (1)                                             |                                                                                                                                                                                                                          |                                                                                                                                                                                                                                                                                                                                           |                                 |                              | P_trifoliata_00491_mRNA_14.1    |
| GF0049222 | 0                            | 0                         | 1                            | Retrotransposon protein, putative, Ty1-copia subclass (1)            | nucleic acid binding [GO:0003676 molecular_function] (1)                                                                                                                                                                 | GAG-pre-integrase domain [IPRO25724] (1); Ribonuclease H-like domain [IPRO12337] (1)                                                                                                                                                                                                                                                      |                                 |                              | P_trifoliata_00490_mRNA_6.1     |
| GF0049221 | 0                            | 0                         | 1                            | Hypothetical protein (1)                                             |                                                                                                                                                                                                                          |                                                                                                                                                                                                                                                                                                                                           |                                 |                              | P_trifoliata_00490_mRNA_4.1     |
| GF0049220 | 0                            | 0                         | 1                            | General transcription factor-like zinc finger protein, putative (1)  |                                                                                                                                                                                                                          |                                                                                                                                                                                                                                                                                                                                           |                                 |                              | P_trifoliata_00490_mRNA_3.1     |
| GF0049219 | 0                            | 0                         | 1                            | Hypothetical protein (1)                                             |                                                                                                                                                                                                                          |                                                                                                                                                                                                                                                                                                                                           |                                 |                              | P_trifoliata_00490_mRNA_21.1    |
| GF0049218 | 0                            | 0                         | 1                            | Hypothetical protein (1)                                             |                                                                                                                                                                                                                          |                                                                                                                                                                                                                                                                                                                                           |                                 |                              | P_trifoliata_00490_mRNA_20.1    |

| ID        | Num. in <i>C. clementiae</i> | Num. in <i>C. uniohii</i> | Num. in <i>P. trifoliata</i> | Note                                                              | GO                                                                                                                                                                                                                                                                                                                                                                                                                                                   | InterPro                                                                                                                                                                                                                                                                                                                                                                       | Members in <i>C. clementiae</i> | Members in <i>C. uniohii</i> | Members in <i>P. trifoliata</i> |
|-----------|------------------------------|---------------------------|------------------------------|-------------------------------------------------------------------|------------------------------------------------------------------------------------------------------------------------------------------------------------------------------------------------------------------------------------------------------------------------------------------------------------------------------------------------------------------------------------------------------------------------------------------------------|--------------------------------------------------------------------------------------------------------------------------------------------------------------------------------------------------------------------------------------------------------------------------------------------------------------------------------------------------------------------------------|---------------------------------|------------------------------|---------------------------------|
| GF0049217 | 0                            | 0                         | 1                            | Hypothetical protein (1)                                          |                                                                                                                                                                                                                                                                                                                                                                                                                                                      | Domain of unknown function DUF4371 [IPR025398] (1)                                                                                                                                                                                                                                                                                                                             | -                               | -                            | P_trifoliata_00490_mRNA_18.1    |
| GF0049216 | 0                            | 0                         | 1                            | Hypothetical protein (1)                                          |                                                                                                                                                                                                                                                                                                                                                                                                                                                      |                                                                                                                                                                                                                                                                                                                                                                                | -                               | -                            | P_trifoliata_00490_mRNA_17.1    |
| GF0049215 | 0                            | 0                         | 1                            | Hypothetical protein (1)                                          |                                                                                                                                                                                                                                                                                                                                                                                                                                                      |                                                                                                                                                                                                                                                                                                                                                                                | -                               | -                            | P_trifoliata_00490_mRNA_14.1    |
| GF0049214 | 0                            | 0                         | 1                            | Hypothetical protein (1)                                          |                                                                                                                                                                                                                                                                                                                                                                                                                                                      |                                                                                                                                                                                                                                                                                                                                                                                | -                               | -                            | P_trifoliata_00490_mRNA_11.1    |
| GF0049213 | 0                            | 0                         | 1                            | WD repeat domain phosphoinositide-interacting 3 (1)               | protein binding [GO:0005515 molecular_function] (1); intracellular [GO:0005840 cellular_component] (1); structural constituent of ribosome [GO:0003735 molecular_function] (1); intracellular [GO:0005622 cellular_component] (1); translation [GO:0006412 biological_process] (1)                                                                                                                                                                   | WD40-repeat-containing domain [IPR017986] (1); WD40/YVTN repeat-like-containing domain [IPR015943] (1)                                                                                                                                                                                                                                                                         | -                               | -                            | P_trifoliata_00489_mRNA_20.1    |
| GF0049212 | 0                            | 0                         | 1                            | 60S ribosomal protein L10 (1)                                     |                                                                                                                                                                                                                                                                                                                                                                                                                                                      | Ribosomal protein L10eL16 [IPR016101] (1); Ribosomal protein L10e, conserved site [IPR018255] (1)                                                                                                                                                                                                                                                                              | -                               | -                            | P_trifoliata_00489_mRNA_16.1    |
| GF0049211 | 0                            | 0                         | 1                            | Hypothetical protein (1)                                          |                                                                                                                                                                                                                                                                                                                                                                                                                                                      |                                                                                                                                                                                                                                                                                                                                                                                | -                               | -                            | P_trifoliata_00489_mRNA_13.1    |
| GF0049210 | 0                            | 0                         | 1                            | Hypothetical protein (1)                                          |                                                                                                                                                                                                                                                                                                                                                                                                                                                      |                                                                                                                                                                                                                                                                                                                                                                                | -                               | -                            | P_trifoliata_00489_mRNA_12.1    |
| GF0049209 | 0                            | 0                         | 1                            | Hypothetical protein (1)                                          |                                                                                                                                                                                                                                                                                                                                                                                                                                                      |                                                                                                                                                                                                                                                                                                                                                                                | -                               | -                            | P_trifoliata_00489_mRNA_1.1     |
| GF0049208 | 0                            | 0                         | 1                            | Hypothetical protein (1)                                          |                                                                                                                                                                                                                                                                                                                                                                                                                                                      |                                                                                                                                                                                                                                                                                                                                                                                | -                               | -                            | P_trifoliata_00488_mRNA_9.1     |
| GF0049207 | 0                            | 0                         | 1                            | Hypothetical protein (1)                                          |                                                                                                                                                                                                                                                                                                                                                                                                                                                      |                                                                                                                                                                                                                                                                                                                                                                                | -                               | -                            | P_trifoliata_00488_mRNA_8.1     |
| GF0049206 | 0                            | 0                         | 1                            | Carbon catabolite repressor-like protein (1)                      |                                                                                                                                                                                                                                                                                                                                                                                                                                                      | Endonuclease/exonuclease/phosphatase [IPR005135] (1)                                                                                                                                                                                                                                                                                                                           | -                               | -                            | P_trifoliata_00488_mRNA_4.1     |
| GF0049205 | 0                            | 0                         | 1                            | Hypothetical protein (1)                                          |                                                                                                                                                                                                                                                                                                                                                                                                                                                      |                                                                                                                                                                                                                                                                                                                                                                                | -                               | -                            | P_trifoliata_00488_mRNA_27.1    |
| GF0049204 | 0                            | 0                         | 1                            | Hypothetical protein (1)                                          |                                                                                                                                                                                                                                                                                                                                                                                                                                                      |                                                                                                                                                                                                                                                                                                                                                                                | -                               | -                            | P_trifoliata_00488_mRNA_26.1    |
| GF0049203 | 0                            | 0                         | 1                            | LRR receptor-like serine/threonine-protein kinase GSO1 (1)        | polyamine binding [GO:0019808 molecular_function] (1); protein binding [GO:0005515 molecular_function] (1); periplasmic space [GO:0042597 cellular_component] (1); polyamine transport [GO:0015846 biological_process] (1)                                                                                                                                                                                                                           | Leucine-rich repeat [IPR001611] (1); Leucine-rich repeat-containing N-terminal, plant-type [IPR013210] (1); Leucine-rich repeat domain, L domain-like [IPR032675] (1); Leucine-rich repeat, typical subtype [IPR003591] (1); Bacterial periplasmic spermidine/putrescine-binding protein [IPR001188] (1)                                                                       | -                               | -                            | P_trifoliata_00488_mRNA_24.1    |
| GF0049202 | 0                            | 0                         | 1                            | Hypothetical protein (1)                                          |                                                                                                                                                                                                                                                                                                                                                                                                                                                      |                                                                                                                                                                                                                                                                                                                                                                                | -                               | -                            | P_trifoliata_00488_mRNA_20.1    |
| GF0049201 | 0                            | 0                         | 1                            | Hypothetical protein (1)                                          |                                                                                                                                                                                                                                                                                                                                                                                                                                                      |                                                                                                                                                                                                                                                                                                                                                                                | -                               | -                            | P_trifoliata_00488_mRNA_2.1     |
| GF0049200 | 0                            | 0                         | 1                            | Hypothetical protein (1)                                          |                                                                                                                                                                                                                                                                                                                                                                                                                                                      |                                                                                                                                                                                                                                                                                                                                                                                | -                               | -                            | P_trifoliata_00487_mRNA_12.1    |
| GF0049199 | 0                            | 0                         | 1                            | Hypothetical protein (1)                                          |                                                                                                                                                                                                                                                                                                                                                                                                                                                      | Iron hydrogenase, large subunit, C-terminal [IPR004108] (1); Iron hydrogenase [IPR009016] (1)                                                                                                                                                                                                                                                                                  | -                               | -                            | P_trifoliata_00487_mRNA_10.1    |
| GF0049198 | 0                            | 0                         | 1                            | Disease resistance protein (CC-NBS-LRR class) family protein (1)  | ADP binding [GO:0043531 molecular_function] (1)                                                                                                                                                                                                                                                                                                                                                                                                      | Leucine-rich repeat domain, L domain-like [IPR032675] (1); P-loop containing nucleoside triphosphate hydrolase [IPR027417] (1); NB-ARC [IPR002182] (1)                                                                                                                                                                                                                         | -                               | -                            | P_trifoliata_00487_mRNA_1.1     |
| GF0049197 | 0                            | 0                         | 1                            | Hypothetical protein (1)                                          |                                                                                                                                                                                                                                                                                                                                                                                                                                                      |                                                                                                                                                                                                                                                                                                                                                                                | -                               | -                            | P_trifoliata_00486_mRNA_9.1     |
| GF0049196 | 0                            | 0                         | 1                            | Hypothetical protein (1)                                          |                                                                                                                                                                                                                                                                                                                                                                                                                                                      | Domain of unknown function DUF632 [IPR006867] (1)                                                                                                                                                                                                                                                                                                                              | -                               | -                            | P_trifoliata_00486_mRNA_8.1     |
| GF0049195 | 0                            | 0                         | 1                            | Hypothetical protein (1)                                          | zinc ion binding [GO:0008270 molecular_function] (1); hydrolase activity [GO:0016787 molecular_function] (1); metabolic process [GO:0008152 biological_process] (1)                                                                                                                                                                                                                                                                                  | Zinc finger, PMZ-type [IPR006564] (1); Zinc finger, SWIM-type [IPR007527] (1)                                                                                                                                                                                                                                                                                                  | -                               | -                            | P_trifoliata_00486_mRNA_7.1     |
| GF0049194 | 0                            | 0                         | 1                            | Hypothetical protein (1)                                          |                                                                                                                                                                                                                                                                                                                                                                                                                                                      | Alpha/Beta hydrolase fold [IPR029058] (1); Alpha/Beta hydrolase fold-3 [IPR013094] (1)                                                                                                                                                                                                                                                                                         | -                               | -                            | P_trifoliata_00486_mRNA_5.1     |
| GF0049193 | 0                            | 0                         | 1                            | Hypothetical protein (1)                                          |                                                                                                                                                                                                                                                                                                                                                                                                                                                      |                                                                                                                                                                                                                                                                                                                                                                                | -                               | -                            | P_trifoliata_00486_mRNA_3.1     |
| GF0049192 | 0                            | 0                         | 1                            | Hypothetical protein (1)                                          |                                                                                                                                                                                                                                                                                                                                                                                                                                                      |                                                                                                                                                                                                                                                                                                                                                                                | -                               | -                            | P_trifoliata_00486_mRNA_24.1    |
| GF0049191 | 0                            | 0                         | 1                            | FAR1 DNA-binding domain protein (1)                               | regulation of transcription, DNA-templated [GO:0006355 biological_process] (1); proteolysis [GO:0006508 biological_process] (1); serine-type carboxypeptidase activity [GO:0044185 molecular_function] (1)                                                                                                                                                                                                                                           | FHY3/FAR1 family [IPR031052] (1); FAR1 DNA binding domain [IPR004330] (1)                                                                                                                                                                                                                                                                                                      | -                               | -                            | P_trifoliata_00486_mRNA_19.1    |
| GF0049190 | 0                            | 0                         | 1                            | Carboxypeptidase (1)                                              | metabolic process [GO:0008152 biological_process] (1); transport [GO:0006810 biological_process] (1); integral component of membrane [GO:0016021 cellular_component] (1); hydrolase activity [GO:0016787 molecular_function] (1); ATP binding [GO:0005524 molecular_function] (1); transmembrane transport [GO:0050805 biological_process] (1); ATPase activity, coupled to transmembrane movement of substances [GO:0042626 molecular_function] (1) | Peptidase S10, serine carboxypeptidase [IPR01563] (1); Alpha/Beta hydrolase fold [IPR029058] (1)                                                                                                                                                                                                                                                                               | -                               | -                            | P_trifoliata_00486_mRNA_16.1    |
| GF0049189 | 0                            | 0                         | 1                            | Hypothetical protein (1)                                          |                                                                                                                                                                                                                                                                                                                                                                                                                                                      | Alpha/Beta hydrolase fold [IPR029058] (1); ABC transporter type 1, transmembrane domain [IPR015277] (1); Alpha/beta hydrolase fold-3 [IPR013094] (1)                                                                                                                                                                                                                           | -                               | -                            | P_trifoliata_00486_mRNA_13.1    |
| GF0049188 | 0                            | 0                         | 1                            | CXE carboxylesterase (1)                                          | hydrolase activity [GO:0016787 molecular_function] (1); metabolic process [GO:0008152 biological_process] (1)                                                                                                                                                                                                                                                                                                                                        | Alpha/Beta hydrolase fold [IPR029058] (1); Alpha/beta hydrolase fold-3 [IPR013094] (1)                                                                                                                                                                                                                                                                                         | -                               | -                            | P_trifoliata_00486_mRNA_10.1    |
| GF0049187 | 0                            | 0                         | 1                            | Vinoreline synthase (1)                                           | transferase activity, transferring acyl groups other than amino-acyl groups [GO:0016747 molecular_function] (1)                                                                                                                                                                                                                                                                                                                                      | Transferase [IPR003480] (1); Chloramphenicol acetyltransferase-like domain [IPR023213] (1)                                                                                                                                                                                                                                                                                     | -                               | -                            | P_trifoliata_00486_mRNA_1.1     |
| GF0049186 | 0                            | 0                         | 1                            | Hypothetical protein (1)                                          | DNA binding [GO:0003677 molecular_function] (1); regulation of transcription, DNA-templated [GO:0006355 biological_process] (1)                                                                                                                                                                                                                                                                                                                      | NAC domain [IPR003441] (1)                                                                                                                                                                                                                                                                                                                                                     | -                               | -                            | P_trifoliata_00485_mRNA_9.1     |
| GF0049185 | 0                            | 0                         | 1                            | Hypothetical protein (1)                                          |                                                                                                                                                                                                                                                                                                                                                                                                                                                      |                                                                                                                                                                                                                                                                                                                                                                                | -                               | -                            | P_trifoliata_00485_mRNA_8.1     |
| GF0049184 | 0                            | 0                         | 1                            | Hypothetical protein (1)                                          |                                                                                                                                                                                                                                                                                                                                                                                                                                                      |                                                                                                                                                                                                                                                                                                                                                                                | -                               | -                            | P_trifoliata_00485_mRNA_25.1    |
| GF0049183 | 0                            | 0                         | 1                            | Non-LTR retroelement reverse transcriptase-like protein (1)       | nucleic acid binding [GO:0003676 molecular_function] (1)                                                                                                                                                                                                                                                                                                                                                                                             | Ribonuclease H-like domain [IPR012337] (1)                                                                                                                                                                                                                                                                                                                                     | -                               | -                            | P_trifoliata_00485_mRNA_24.1    |
| GF0049182 | 0                            | 0                         | 1                            | Hypothetical protein (1)                                          |                                                                                                                                                                                                                                                                                                                                                                                                                                                      |                                                                                                                                                                                                                                                                                                                                                                                | -                               | -                            | P_trifoliata_00485_mRNA_23.1    |
| GF0049181 | 0                            | 0                         | 1                            | Hypothetical protein (1)                                          |                                                                                                                                                                                                                                                                                                                                                                                                                                                      |                                                                                                                                                                                                                                                                                                                                                                                | -                               | -                            | P_trifoliata_00485_mRNA_22.1    |
| GF0049180 | 0                            | 0                         | 1                            | Hypothetical protein (1)                                          |                                                                                                                                                                                                                                                                                                                                                                                                                                                      |                                                                                                                                                                                                                                                                                                                                                                                | -                               | -                            | P_trifoliata_00485_mRNA_12.1    |
| GF0049179 | 0                            | 0                         | 1                            | Non-LTR retroelement reverse transcriptase-like (1)               | RNA-DNA hybrid ribonuclease activity [GO:0004523 molecular_function] (1); nucleic acid binding [GO:0003676 molecular_function] (1)                                                                                                                                                                                                                                                                                                                   | Ribonuclease H-like domain [IPR012337] (1); Reverse transcriptase zinc-binding domain [IPR026960] (1); Ribonuclease H domain [IPR002156] (1)                                                                                                                                                                                                                                   | -                               | -                            | P_trifoliata_00485_mRNA_1.1     |
| GF0049178 | 0                            | 0                         | 1                            | Hypothetical protein (1)                                          |                                                                                                                                                                                                                                                                                                                                                                                                                                                      |                                                                                                                                                                                                                                                                                                                                                                                | -                               | -                            | P_trifoliata_00484_mRNA_8.1     |
| GF0049177 | 0                            | 0                         | 1                            | Hypothetical protein (1)                                          |                                                                                                                                                                                                                                                                                                                                                                                                                                                      |                                                                                                                                                                                                                                                                                                                                                                                | -                               | -                            | P_trifoliata_00483_mRNA_8.1     |
| GF0049176 | 0                            | 0                         | 1                            | Ribonuclease H protein (1)                                        | nucleic acid binding [GO:0003676 molecular_function] (1); RNA-DNA hybrid ribonuclease activity [GO:0004523 molecular_function] (1)                                                                                                                                                                                                                                                                                                                   | Ribonuclease H domain [IPR002156] (1); Ribonuclease H-like domain [IPR012337] (1)                                                                                                                                                                                                                                                                                              | -                               | -                            | P_trifoliata_00483_mRNA_4.1     |
| GF0049175 | 0                            | 0                         | 1                            | Hypothetical protein (1)                                          |                                                                                                                                                                                                                                                                                                                                                                                                                                                      |                                                                                                                                                                                                                                                                                                                                                                                | -                               | -                            | P_trifoliata_00483_mRNA_3.1     |
| GF0049174 | 0                            | 0                         | 1                            | Hypothetical protein (1)                                          |                                                                                                                                                                                                                                                                                                                                                                                                                                                      |                                                                                                                                                                                                                                                                                                                                                                                | -                               | -                            | P_trifoliata_00483_mRNA_27.1    |
| GF0049173 | 0                            | 0                         | 1                            | Hypothetical protein (1)                                          |                                                                                                                                                                                                                                                                                                                                                                                                                                                      |                                                                                                                                                                                                                                                                                                                                                                                | -                               | -                            | P_trifoliata_00483_mRNA_25.1    |
| GF0049172 | 0                            | 0                         | 1                            | Hypothetical protein (1)                                          |                                                                                                                                                                                                                                                                                                                                                                                                                                                      |                                                                                                                                                                                                                                                                                                                                                                                | -                               | -                            | P_trifoliata_00483_mRNA_24.1    |
| GF0049171 | 0                            | 0                         | 1                            | Hypothetical protein (1)                                          |                                                                                                                                                                                                                                                                                                                                                                                                                                                      |                                                                                                                                                                                                                                                                                                                                                                                | -                               | -                            | P_trifoliata_00483_mRNA_23.1    |
| GF0049170 | 0                            | 0                         | 1                            | Hypothetical protein (1)                                          |                                                                                                                                                                                                                                                                                                                                                                                                                                                      |                                                                                                                                                                                                                                                                                                                                                                                | -                               | -                            | P_trifoliata_00483_mRNA_22.1    |
| GF0049169 | 0                            | 0                         | 1                            | Hypothetical protein (1)                                          |                                                                                                                                                                                                                                                                                                                                                                                                                                                      |                                                                                                                                                                                                                                                                                                                                                                                | -                               | -                            | P_trifoliata_00483_mRNA_20.1    |
| GF0049168 | 0                            | 0                         | 1                            | Hypothetical protein (1)                                          |                                                                                                                                                                                                                                                                                                                                                                                                                                                      |                                                                                                                                                                                                                                                                                                                                                                                | -                               | -                            | P_trifoliata_00483_mRNA_2.1     |
| GF0049167 | 0                            | 0                         | 1                            | Hypothetical protein (1)                                          |                                                                                                                                                                                                                                                                                                                                                                                                                                                      |                                                                                                                                                                                                                                                                                                                                                                                | -                               | -                            | P_trifoliata_00483_mRNA_18.1    |
| GF0049166 | 0                            | 0                         | 1                            | Hypothetical protein (1)                                          |                                                                                                                                                                                                                                                                                                                                                                                                                                                      |                                                                                                                                                                                                                                                                                                                                                                                | -                               | -                            | P_trifoliata_00483_mRNA_15.1    |
| GF0049165 | 0                            | 0                         | 1                            | Hypothetical protein (1)                                          |                                                                                                                                                                                                                                                                                                                                                                                                                                                      |                                                                                                                                                                                                                                                                                                                                                                                | -                               | -                            | P_trifoliata_00483_mRNA_1.1     |
| GF0049164 | 0                            | 0                         | 1                            | Hypothetical protein (1)                                          |                                                                                                                                                                                                                                                                                                                                                                                                                                                      |                                                                                                                                                                                                                                                                                                                                                                                | -                               | -                            | P_trifoliata_00482_mRNA_8.1     |
| GF0049163 | 0                            | 0                         | 1                            | G-type lectin S receptor-like serine/threonine-protein kinase (1) | ATP binding [GO:0005524 molecular_function] (1); protein kinase activity [GO:0004702 molecular_function] (1); protein phosphorylation [GO:0006468 biological_process] (1)                                                                                                                                                                                                                                                                            | Serine/threonine-protein kinase, active site [IPR008271] (1); Serine/threonine/dual specificity protein kinase, catalytic domain [IPR002290] (1); Serine/threonine/tyrosine-protein kinase catalytic domain [IPR001245] (1); Protein kinase domain [IPR000719] (1); Protein kinase-like domain [IPR011009] (1); Concansavalin A-like lectin/glycosylase domain [IPR013320] (1) | -                               | -                            | P_trifoliata_00482_mRNA_22.1    |
| GF0049162 | 0                            | 0                         | 1                            | Hypothetical protein (1)                                          |                                                                                                                                                                                                                                                                                                                                                                                                                                                      |                                                                                                                                                                                                                                                                                                                                                                                | -                               | -                            | P_trifoliata_00482_mRNA_20.1    |
| GF0049161 | 0                            | 0                         | 1                            | Hypothetical protein (1)                                          | nucleic acid binding [GO:0003676 molecular_function] (1)                                                                                                                                                                                                                                                                                                                                                                                             | Ribonuclease H-like domain [IPR012337] (1)                                                                                                                                                                                                                                                                                                                                     | -                               | -                            | P_trifoliata_00482_mRNA_19.1    |
| GF0049160 | 0                            | 0                         | 1                            | Hypothetical protein (1)                                          |                                                                                                                                                                                                                                                                                                                                                                                                                                                      |                                                                                                                                                                                                                                                                                                                                                                                | -                               | -                            | P_trifoliata_00482_mRNA_18.1    |
| GF0049159 | 0                            | 0                         | 1                            | LRR receptor-like serine/threonine-protein kinase ERL2 (1)        | protein binding [GO:0005515 molecular_function] (1)                                                                                                                                                                                                                                                                                                                                                                                                  | Leucine-rich repeat-containing N-terminal, plant-type [IPR013210] (1); Leucine-rich repeat [IPR001611] (1); Leucine-rich repeat, typical subtype [IPR003591] (1); Leucine-rich repeat domain, L domain-like [IPR032675] (1)                                                                                                                                                    | -                               | -                            | P_trifoliata_00482_mRNA_17.1    |
| GF0049158 | 0                            | 0                         | 1                            | Hypothetical protein (1)                                          | carbohydrate metabolic process [GO:0009975 biological_process] (1)                                                                                                                                                                                                                                                                                                                                                                                   | Glycoside hydrolase superfamily [IPR017853] (1); Glycoside hydrolase, catalytic domain [IPR013781] (1)                                                                                                                                                                                                                                                                         | -                               | -                            | P_trifoliata_00482_mRNA_11.1    |
| GF0049157 | 0                            | 0                         | 1                            | Hypothetical protein (1)                                          |                                                                                                                                                                                                                                                                                                                                                                                                                                                      |                                                                                                                                                                                                                                                                                                                                                                                | -                               | -                            | P_trifoliata_00481_mRNA_9.1     |
| GF0049156 | 0                            | 0                         | 1                            | Hypothetical protein (1)                                          | protein kinase activity [GO:0004672 molecular_function] (1); protein phosphorylation [GO:0006468 biological_process] (1); ATP binding [GO:0005524 molecular_function] (1)                                                                                                                                                                                                                                                                            | Protein kinase-like domain [IPR011009] (1); Protein kinase domain [IPR000719] (1)                                                                                                                                                                                                                                                                                              | -                               | -                            | P_trifoliata_00481_mRNA_25.1    |

| ID        | Num. in <i>C. clementiae</i> | Num. in <i>C. canthii</i> | Num. in <i>P. trifoliata</i> | Note                                                               | GO                                                                                                                                                                                                                                   | InterPro                                                                                                                                                                                                                                                                                                                                                                                                                                                                             | Members in <i>C. clementiae</i> | Members in <i>C. canthii</i> | Members in <i>P. trifoliata</i> |
|-----------|------------------------------|---------------------------|------------------------------|--------------------------------------------------------------------|--------------------------------------------------------------------------------------------------------------------------------------------------------------------------------------------------------------------------------------|--------------------------------------------------------------------------------------------------------------------------------------------------------------------------------------------------------------------------------------------------------------------------------------------------------------------------------------------------------------------------------------------------------------------------------------------------------------------------------------|---------------------------------|------------------------------|---------------------------------|
| GF0049155 | 0                            | 0                         | 1                            | G-type lectin S-receptor-like serine/threonine-protein kinase RLK1 | protein phosphorylation [GO:0006468 biological_process] (1); recognition of pollen [GO:0048544 biological_process] (1); protein kinase activity [GO:0004672 molecular_function] (1); ATP binding [GO:0005524 molecular_function] (1) | Protein kinase, ATP binding site [IPR017441] (1); S-locus glycoprotein domain [IPR000851] (1); Bulb-type lectin domain [IPR001480] (1); Protein kinase domain [IPR000719] (1); Protein kinase-like domain [IPR011009] (1); Concavalin A-like lectin/glucanase domain [IPR013320] (1)                                                                                                                                                                                                 | -                               | -                            | P_trifoliata_00481_mRNA_23.1    |
| GF0049154 | 0                            | 0                         | 1                            | Hypothetical protein (1)                                           | transporter activity [GO:0005215 molecular_function] (1); membrane [GO:0016020 cellular_component] (1); transport [GO:0006810 biological_process] (1)                                                                                | Proton-dependent oligopeptide transporter family [IPR000109] (1)                                                                                                                                                                                                                                                                                                                                                                                                                     | -                               | -                            | P_trifoliata_00481_mRNA_16.1    |
| GF0049153 | 0                            | 0                         | 1                            | Hypothetical protein (1)                                           | RNA-DNA hybrid ribonuclease activity [GO:0004523 molecular_function] (1); nucleic acid binding [GO:0003676 molecular_function] (1)                                                                                                   | Ribonuclease H domain [IPR002156] (1); Reverse transcriptase zinc-binding domain [IPR029960] (1); Domain of unknown function DUF4283 [IPR025558] (1); Ribonuclease H-like domain [IPR012337] (1)                                                                                                                                                                                                                                                                                     | -                               | -                            | P_trifoliata_00481_mRNA_15.1    |
| GF0049152 | 0                            | 0                         | 1                            | Hypothetical protein (1)                                           |                                                                                                                                                                                                                                      |                                                                                                                                                                                                                                                                                                                                                                                                                                                                                      | -                               | -                            | P_trifoliata_00481_mRNA_14.1    |
| GF0049151 | 0                            | 0                         | 1                            | Hypothetical protein (1)                                           |                                                                                                                                                                                                                                      |                                                                                                                                                                                                                                                                                                                                                                                                                                                                                      | -                               | -                            | P_trifoliata_00481_mRNA_13.1    |
| GF0049150 | 0                            | 0                         | 1                            | Hypothetical protein (1)                                           |                                                                                                                                                                                                                                      |                                                                                                                                                                                                                                                                                                                                                                                                                                                                                      | -                               | -                            | P_trifoliata_00481_mRNA_11.1    |
| GF0049149 | 0                            | 0                         | 1                            | Hypothetical protein (1)                                           |                                                                                                                                                                                                                                      |                                                                                                                                                                                                                                                                                                                                                                                                                                                                                      | -                               | -                            | P_trifoliata_00480_mRNA_9.1     |
| GF0049148 | 0                            | 0                         | 1                            | Hypothetical protein (1)                                           | ADP binding [GO:0043531 molecular_function] (1)                                                                                                                                                                                      | P-loop containing nucleoside triphosphate hydrolase [IPR027417] (1); NB-ARC [IPR021822] (1)                                                                                                                                                                                                                                                                                                                                                                                          | -                               | -                            | P_trifoliata_00480_mRNA_7.1     |
| GF0049147 | 0                            | 0                         | 1                            | Hypothetical protein (1)                                           |                                                                                                                                                                                                                                      | Pre-miRNA 3'-end-processing endonuclease polyadenylation factor C-term [IPR021718] (1)                                                                                                                                                                                                                                                                                                                                                                                               | -                               | -                            | P_trifoliata_00480_mRNA_3.1     |
| GF0049146 | 0                            | 0                         | 1                            | Hypothetical protein (1)                                           |                                                                                                                                                                                                                                      |                                                                                                                                                                                                                                                                                                                                                                                                                                                                                      | -                               | -                            | P_trifoliata_00480_mRNA_22.1    |
| GF0049145 | 0                            | 0                         | 1                            | Hypothetical protein (1)                                           |                                                                                                                                                                                                                                      |                                                                                                                                                                                                                                                                                                                                                                                                                                                                                      | -                               | -                            | P_trifoliata_00480_mRNA_21.1    |
| GF0049144 | 0                            | 0                         | 1                            | Hypothetical protein (1)                                           | nucleic acid binding [GO:0003676 molecular_function] (1)                                                                                                                                                                             | Ribonuclease H-like domain [IPR012337] (1)                                                                                                                                                                                                                                                                                                                                                                                                                                           | -                               | -                            | P_trifoliata_00480_mRNA_20.1    |
| GF0049143 | 0                            | 0                         | 1                            | Hypothetical protein (1)                                           |                                                                                                                                                                                                                                      |                                                                                                                                                                                                                                                                                                                                                                                                                                                                                      | -                               | -                            | P_trifoliata_00480_mRNA_19.1    |
| GF0049142 | 0                            | 0                         | 1                            | Hypothetical protein (1)                                           |                                                                                                                                                                                                                                      |                                                                                                                                                                                                                                                                                                                                                                                                                                                                                      | -                               | -                            | P_trifoliata_00480_mRNA_18.1    |
| GF0049141 | 0                            | 0                         | 1                            | Hypothetical protein (1)                                           |                                                                                                                                                                                                                                      |                                                                                                                                                                                                                                                                                                                                                                                                                                                                                      | -                               | -                            | P_trifoliata_00480_mRNA_10.1    |
| GF0049140 | 0                            | 0                         | 1                            | Hypothetical protein (1)                                           |                                                                                                                                                                                                                                      |                                                                                                                                                                                                                                                                                                                                                                                                                                                                                      | -                               | -                            | P_trifoliata_00479_mRNA_9.1     |
| GF0049139 | 0                            | 0                         | 1                            | Hypothetical protein (1)                                           | recognition of pollen [GO:0048544 biological_process] (1)                                                                                                                                                                            | S-locus glycoprotein domain [IPR000851] (1); Bulb-type lectin domain [IPR001480] (1)                                                                                                                                                                                                                                                                                                                                                                                                 | -                               | -                            | P_trifoliata_00479_mRNA_3.1     |
| GF0049138 | 0                            | 0                         | 1                            | Hypothetical protein (1)                                           |                                                                                                                                                                                                                                      | Bulb-type lectin domain [IPR001480] (1)                                                                                                                                                                                                                                                                                                                                                                                                                                              | -                               | -                            | P_trifoliata_00479_mRNA_2.1     |
| GF0049137 | 0                            | 0                         | 1                            | family protein (1)                                                 |                                                                                                                                                                                                                                      | Pentatricopeptide repeat [IPR002885] (1)                                                                                                                                                                                                                                                                                                                                                                                                                                             | -                               | -                            | P_trifoliata_00479_mRNA_18.1    |
| GF0049136 | 0                            | 0                         | 1                            | Hypothetical protein (1)                                           |                                                                                                                                                                                                                                      |                                                                                                                                                                                                                                                                                                                                                                                                                                                                                      | -                               | -                            | P_trifoliata_00479_mRNA_12.1    |
| GF0049135 | 0                            | 0                         | 1                            | S-type anion channel SLAH1                                         | transmembrane transport [GO:0050805 biological_process] (1); integral component of membrane [GO:0016021 cellular_component] (1)                                                                                                      | Voltage-dependent anion channel [IPR004695] (1)                                                                                                                                                                                                                                                                                                                                                                                                                                      | -                               | -                            | P_trifoliata_00478_mRNA_8.1     |
| GF0049134 | 0                            | 0                         | 1                            | BRASSINOSTEROID INSENSITIVE 1, putative, expressed (1)             | protein binding [GO:0005515 molecular_function] (1)                                                                                                                                                                                  | Leucine-rich repeat [IPR001611] (1); Leucine-rich repeat domain, L domain-like [IPR032675] (1)                                                                                                                                                                                                                                                                                                                                                                                       | -                               | -                            | P_trifoliata_00478_mRNA_5.1     |
| GF0049133 | 0                            | 0                         | 1                            | Hypothetical protein (1)                                           |                                                                                                                                                                                                                                      |                                                                                                                                                                                                                                                                                                                                                                                                                                                                                      | -                               | -                            | P_trifoliata_00478_mRNA_4.1     |
| GF0049132 | 0                            | 0                         | 1                            | Hypothetical protein (1)                                           |                                                                                                                                                                                                                                      |                                                                                                                                                                                                                                                                                                                                                                                                                                                                                      | -                               | -                            | P_trifoliata_00478_mRNA_27.1    |
| GF0049131 | 0                            | 0                         | 1                            | Hypothetical protein (1)                                           |                                                                                                                                                                                                                                      |                                                                                                                                                                                                                                                                                                                                                                                                                                                                                      | -                               | -                            | P_trifoliata_00478_mRNA_11.1    |
| GF0049130 | 0                            | 0                         | 1                            | Hypothetical protein (1)                                           |                                                                                                                                                                                                                                      |                                                                                                                                                                                                                                                                                                                                                                                                                                                                                      | -                               | -                            | P_trifoliata_00477_mRNA_6.1     |
| GF0049129 | 0                            | 0                         | 1                            | Hypothetical protein (1)                                           |                                                                                                                                                                                                                                      | NAD(P)-binding domain [IPR016040] (1)                                                                                                                                                                                                                                                                                                                                                                                                                                                | -                               | -                            | P_trifoliata_00477_mRNA_5.1     |
| GF0049128 | 0                            | 0                         | 1                            | Hypothetical protein (1)                                           |                                                                                                                                                                                                                                      |                                                                                                                                                                                                                                                                                                                                                                                                                                                                                      | -                               | -                            | P_trifoliata_00477_mRNA_25.1    |
| GF0049127 | 0                            | 0                         | 1                            | Hypothetical protein (1)                                           |                                                                                                                                                                                                                                      |                                                                                                                                                                                                                                                                                                                                                                                                                                                                                      | -                               | -                            | P_trifoliata_00477_mRNA_23.1    |
| GF0049126 | 0                            | 0                         | 1                            | Hypothetical protein (1)                                           |                                                                                                                                                                                                                                      |                                                                                                                                                                                                                                                                                                                                                                                                                                                                                      | -                               | -                            | P_trifoliata_00477_mRNA_21.1    |
| GF0049125 | 0                            | 0                         | 1                            | Hypothetical protein (1)                                           |                                                                                                                                                                                                                                      | Zinc knuckle CX2CX4HX4C [IPR025836] (1)                                                                                                                                                                                                                                                                                                                                                                                                                                              | -                               | -                            | P_trifoliata_00477_mRNA_20.1    |
| GF0049124 | 0                            | 0                         | 1                            | Hypothetical protein (1)                                           |                                                                                                                                                                                                                                      | Reverse transcriptase, RNA-dependent DNA polymerase [IPR013103] (1)                                                                                                                                                                                                                                                                                                                                                                                                                  | -                               | -                            | P_trifoliata_00477_mRNA_19.1    |
| GF0049123 | 0                            | 0                         | 1                            | Hypothetical protein (1)                                           |                                                                                                                                                                                                                                      |                                                                                                                                                                                                                                                                                                                                                                                                                                                                                      | -                               | -                            | P_trifoliata_00477_mRNA_15.1    |
| GF0049122 | 0                            | 0                         | 1                            | Cytokinin riboside 5'-monophosphate phosphoribohydrolase (1)       |                                                                                                                                                                                                                                      |                                                                                                                                                                                                                                                                                                                                                                                                                                                                                      | -                               | -                            | P_trifoliata_00477_mRNA_13.1    |
| GF0049121 | 0                            | 0                         | 1                            | Hypothetical protein (1)                                           |                                                                                                                                                                                                                                      |                                                                                                                                                                                                                                                                                                                                                                                                                                                                                      | -                               | -                            | P_trifoliata_00477_mRNA_12.1    |
| GF0049120 | 0                            | 0                         | 1                            | Hypothetical protein (1)                                           |                                                                                                                                                                                                                                      |                                                                                                                                                                                                                                                                                                                                                                                                                                                                                      | -                               | -                            | P_trifoliata_00476_mRNA_8.1     |
| GF0049119 | 0                            | 0                         | 1                            | Hypothetical protein (1)                                           |                                                                                                                                                                                                                                      |                                                                                                                                                                                                                                                                                                                                                                                                                                                                                      | -                               | -                            | P_trifoliata_00476_mRNA_7.1     |
| GF0049118 | 0                            | 0                         | 1                            | Hypothetical protein (1)                                           |                                                                                                                                                                                                                                      |                                                                                                                                                                                                                                                                                                                                                                                                                                                                                      | -                               | -                            | P_trifoliata_00476_mRNA_5.1     |
| GF0049117 | 0                            | 0                         | 1                            | Hypothetical protein (1)                                           | catalytic activity [GO:0003824 molecular_function] (1)                                                                                                                                                                               | Pyridoxal phosphate-dependent transferase, major region, subdomain 1 [IPR015421] (1); Alpha crystallin/Hsp20 domain [IPR002068] (1); HSP20-like chaperone [IPR008978] (1); Pyridoxal phosphate-dependent transferase [IPR015424] (1)                                                                                                                                                                                                                                                 | -                               | -                            | P_trifoliata_00476_mRNA_4.1     |
| GF0049116 | 0                            | 0                         | 1                            | Hypothetical protein (1)                                           |                                                                                                                                                                                                                                      |                                                                                                                                                                                                                                                                                                                                                                                                                                                                                      | -                               | -                            | P_trifoliata_00476_mRNA_23.1    |
| GF0049115 | 0                            | 0                         | 1                            | Hypothetical protein (1)                                           |                                                                                                                                                                                                                                      |                                                                                                                                                                                                                                                                                                                                                                                                                                                                                      | -                               | -                            | P_trifoliata_00476_mRNA_15.1    |
| GF0049114 | 0                            | 0                         | 1                            | Hypothetical protein (1)                                           |                                                                                                                                                                                                                                      |                                                                                                                                                                                                                                                                                                                                                                                                                                                                                      | -                               | -                            | P_trifoliata_00476_mRNA_13.1    |
| GF0049113 | 0                            | 0                         | 1                            | Hypothetical protein (1)                                           |                                                                                                                                                                                                                                      |                                                                                                                                                                                                                                                                                                                                                                                                                                                                                      | -                               | -                            | P_trifoliata_00475_mRNA_8.1     |
| GF0049112 | 0                            | 0                         | 1                            | Monosaccharide transport protein (1)                               |                                                                                                                                                                                                                                      |                                                                                                                                                                                                                                                                                                                                                                                                                                                                                      | -                               | -                            | P_trifoliata_00475_mRNA_7.1     |
| GF0049111 | 0                            | 0                         | 1                            | Hypothetical protein (1)                                           | ATP binding [GO:0005524 molecular_function] (1); protein phosphorylation [GO:0006468 biological_process] (1); protein kinase activity [GO:0004672 molecular_function] (1)                                                            | Protein kinase domain [IPR000719] (1); Protein kinase-like domain [IPR011009] (1); Maltotriose carbohydrate-binding domain [IPR024788] (1); Concavalin A-like lectin/glucanase domain [IPR013320] (1); Serine/threonine-protein kinase, active site [IPR008271] (1); Protein kinase, ATP binding site [IPR017441] (1); Serine/threonine/dual specificity protein kinase, catalytic domain [IPR002290] (1); Serine/threonine/tyrosine-protein kinase catalytic domain [IPR001245] (1) | -                               | -                            | P_trifoliata_00475_mRNA_3.1     |
| GF0049110 | 0                            | 0                         | 1                            | Hypothetical protein (1)                                           |                                                                                                                                                                                                                                      |                                                                                                                                                                                                                                                                                                                                                                                                                                                                                      | -                               | -                            | P_trifoliata_00475_mRNA_19.1    |
| GF0049109 | 0                            | 0                         | 1                            | Hypothetical protein (1)                                           |                                                                                                                                                                                                                                      | FBD domain [IPR006566] (1)                                                                                                                                                                                                                                                                                                                                                                                                                                                           | -                               | -                            | P_trifoliata_00475_mRNA_15.1    |
| GF0049108 | 0                            | 0                         | 1                            | Hypothetical protein (1)                                           |                                                                                                                                                                                                                                      |                                                                                                                                                                                                                                                                                                                                                                                                                                                                                      | -                               | -                            | P_trifoliata_00475_mRNA_11.1    |
| GF0049107 | 0                            | 0                         | 1                            | Hypothetical protein (1)                                           |                                                                                                                                                                                                                                      |                                                                                                                                                                                                                                                                                                                                                                                                                                                                                      | -                               | -                            | P_trifoliata_00475_mRNA_1.1     |
| GF0049106 | 0                            | 0                         | 1                            | Hypothetical protein (1)                                           | DNA integration [GO:0015074 biological_process] (1); nucleic acid binding [GO:0003676 molecular_function] (1)                                                                                                                        | Ribonuclease H-like domain [IPR012337] (1); Integrase, catalytic core [IPR001584] (1)                                                                                                                                                                                                                                                                                                                                                                                                | -                               | -                            | P_trifoliata_00474_mRNA_22.1    |
| GF0049105 | 0                            | 0                         | 1                            | Hypothetical protein (1)                                           | catalytic activity [GO:0003824 molecular_function] (1)                                                                                                                                                                               | L-Asparatase-like [IPR008948] (1); Phenylalanine ammonia-lyase, shielding domain [IPR023144] (1)                                                                                                                                                                                                                                                                                                                                                                                     | -                               | -                            | P_trifoliata_00474_mRNA_15.1    |
| GF0049104 | 0                            | 0                         | 1                            | Hypothetical protein (1)                                           |                                                                                                                                                                                                                                      |                                                                                                                                                                                                                                                                                                                                                                                                                                                                                      | -                               | -                            | P_trifoliata_00474_mRNA_12.1    |
| GF0049103 | 0                            | 0                         | 1                            | OTU domain-containing (1)                                          |                                                                                                                                                                                                                                      | OTU domain [IPR003223] (1)                                                                                                                                                                                                                                                                                                                                                                                                                                                           | -                               | -                            | P_trifoliata_00474_mRNA_1.1     |
| GF0049102 | 0                            | 0                         | 1                            | Hypothetical protein (1)                                           |                                                                                                                                                                                                                                      |                                                                                                                                                                                                                                                                                                                                                                                                                                                                                      | -                               | -                            | P_trifoliata_00473_mRNA_4.1     |
| GF0049101 | 0                            | 0                         | 1                            | Translationaly-controlled tumor protein homolog (1)                |                                                                                                                                                                                                                                      | Translationaly controlled tumour protein, conserved site [IPR018103] (1); Msi4-like [IPR011057] (1); Translationaly controlled tumour protein [IPR018105] (1); Msi4/translationaly controlled tumour-associated TCTP [IPR01323] (1)                                                                                                                                                                                                                                                  | -                               | -                            | P_trifoliata_00473_mRNA_23.1    |
| GF0049100 | 0                            | 0                         | 1                            | Hypothetical protein (1)                                           |                                                                                                                                                                                                                                      |                                                                                                                                                                                                                                                                                                                                                                                                                                                                                      | -                               | -                            | P_trifoliata_00473_mRNA_10.1    |
| GF0049099 | 0                            | 0                         | 1                            | Hypothetical protein (1)                                           |                                                                                                                                                                                                                                      |                                                                                                                                                                                                                                                                                                                                                                                                                                                                                      | -                               | -                            | P_trifoliata_00472_mRNA_9.1     |
| GF0049098 | 0                            | 0                         | 1                            | Hypothetical protein (1)                                           |                                                                                                                                                                                                                                      |                                                                                                                                                                                                                                                                                                                                                                                                                                                                                      | -                               | -                            | P_trifoliata_00472_mRNA_8.1     |
| GF0049097 | 0                            | 0                         | 1                            | Kinase domain protein (1)                                          |                                                                                                                                                                                                                                      |                                                                                                                                                                                                                                                                                                                                                                                                                                                                                      | -                               | -                            | P_trifoliata_00472_mRNA_7.1     |
| GF0049096 | 0                            | 0                         | 1                            | Hypothetical protein (1)                                           |                                                                                                                                                                                                                                      |                                                                                                                                                                                                                                                                                                                                                                                                                                                                                      | -                               | -                            | P_trifoliata_00472_mRNA_6.1     |
| GF0049095 | 0                            | 0                         | 1                            | Hypothetical protein (1)                                           |                                                                                                                                                                                                                                      |                                                                                                                                                                                                                                                                                                                                                                                                                                                                                      | -                               | -                            | P_trifoliata_00472_mRNA_4.1     |
| GF0049094 | 0                            | 0                         | 1                            | Hypothetical protein (1)                                           |                                                                                                                                                                                                                                      |                                                                                                                                                                                                                                                                                                                                                                                                                                                                                      | -                               | -                            | P_trifoliata_00472_mRNA_30.1    |
| GF0049093 | 0                            | 0                         | 1                            | Hypothetical protein (1)                                           |                                                                                                                                                                                                                                      |                                                                                                                                                                                                                                                                                                                                                                                                                                                                                      | -                               | -                            | P_trifoliata_00472_mRNA_29.1    |
| GF0049092 | 0                            | 0                         | 1                            | Hypothetical protein (1)                                           |                                                                                                                                                                                                                                      |                                                                                                                                                                                                                                                                                                                                                                                                                                                                                      | -                               | -                            | P_trifoliata_00472_mRNA_28.1    |
| GF0049091 | 0                            | 0                         | 1                            | Hypothetical protein (1)                                           |                                                                                                                                                                                                                                      |                                                                                                                                                                                                                                                                                                                                                                                                                                                                                      | -                               | -                            | P_trifoliata_00472_mRNA_26.1    |
| GF0049090 | 0                            | 0                         | 1                            | Hypothetical protein (1)                                           |                                                                                                                                                                                                                                      |                                                                                                                                                                                                                                                                                                                                                                                                                                                                                      | -                               | -                            | P_trifoliata_00472_mRNA_25.1    |
| GF0049089 | 0                            | 0                         | 1                            | Hypothetical protein (1)                                           |                                                                                                                                                                                                                                      |                                                                                                                                                                                                                                                                                                                                                                                                                                                                                      | -                               | -                            | P_trifoliata_00472_mRNA_22.1    |
| GF0049088 | 0                            | 0                         | 1                            | Hypothetical protein (1)                                           |                                                                                                                                                                                                                                      |                                                                                                                                                                                                                                                                                                                                                                                                                                                                                      | -                               | -                            | P_trifoliata_00472_mRNA_21.1    |
| GF0049087 | 0                            | 0                         | 1                            | Hypothetical protein (1)                                           |                                                                                                                                                                                                                                      |                                                                                                                                                                                                                                                                                                                                                                                                                                                                                      | -                               | -                            | P_trifoliata_00472_mRNA_20.1    |
| GF0049086 | 0                            | 0                         | 1                            | Hypothetical protein (1)                                           |                                                                                                                                                                                                                                      |                                                                                                                                                                                                                                                                                                                                                                                                                                                                                      | -                               | -                            | P_trifoliata_00472_mRNA_19.1    |
| GF0049085 | 0                            | 0                         | 1                            | Hypothetical protein (1)                                           |                                                                                                                                                                                                                                      |                                                                                                                                                                                                                                                                                                                                                                                                                                                                                      | -                               | -                            | P_trifoliata_00472_mRNA_17.1    |
| GF0049084 | 0                            | 0                         | 1                            | Hypothetical protein (1)                                           |                                                                                                                                                                                                                                      |                                                                                                                                                                                                                                                                                                                                                                                                                                                                                      | -                               | -                            | P_trifoliata_00472_mRNA_15.1    |
| GF0049083 | 0                            | 0                         | 1                            | Hypothetical protein (1)                                           |                                                                                                                                                                                                                                      |                                                                                                                                                                                                                                                                                                                                                                                                                                                                                      | -                               | -                            | P_trifoliata_00472_mRNA_10.1    |
| GF0049082 | 0                            | 0                         | 1                            | Hypothetical protein (1)                                           |                                                                                                                                                                                                                                      |                                                                                                                                                                                                                                                                                                                                                                                                                                                                                      | -                               | -                            | P_trifoliata_00472_mRNA_1.1     |
| GF0049081 | 0                            | 0                         | 1                            | Hypothetical protein (1)                                           |                                                                                                                                                                                                                                      |                                                                                                                                                                                                                                                                                                                                                                                                                                                                                      | -                               | -                            | P_trifoliata_00471_mRNA_2.1     |
| GF0049080 | 0                            | 0                         | 1                            | Hypothetical protein (1)                                           |                                                                                                                                                                                                                                      |                                                                                                                                                                                                                                                                                                                                                                                                                                                                                      | -                               | -                            | P_trifoliata_00471_mRNA_16.1    |
| GF0049079 | 0                            | 0                         | 1                            | Hypothetical protein (1)                                           |                                                                                                                                                                                                                                      |                                                                                                                                                                                                                                                                                                                                                                                                                                                                                      | -                               | -                            | P_trifoliata_00471_mRNA_12.1    |
| GF0049078 | 0                            | 0                         | 1                            | Hypothetical protein (1)                                           |                                                                                                                                                                                                                                      |                                                                                                                                                                                                                                                                                                                                                                                                                                                                                      | -                               | -                            | P_trifoliata_00471_mRNA_1.1     |
| GF0049077 | 0                            | 0                         | 1                            | Maternal effect embryo arrest protein (1)                          |                                                                                                                                                                                                                                      |                                                                                                                                                                                                                                                                                                                                                                                                                                                                                      | -                               | -                            | P_trifoliata_00470_mRNA_7.1     |

| ID        | Num. in <i>C. clementiae</i> | Num. in <i>C. canihii</i> | Num. in <i>P. trifoliata</i> | Note                                                                           | GO                                                                                                                                                                                                                                                                                                                                                                                                                                                                                                                                                                                                                                                                                                                                                                                                                                                                                                                                                                                                                                                                                                                                                                                                                                                                                           | InterPro                                                                                                                                                                                                                                                                              | Members in <i>C. clementiae</i>                                                                                                                                                                                                                                                                                                                                                                                                                                                                                                                                                                       | Members in <i>C. canihii</i> | Members in <i>P. trifoliata</i> |                              |
|-----------|------------------------------|---------------------------|------------------------------|--------------------------------------------------------------------------------|----------------------------------------------------------------------------------------------------------------------------------------------------------------------------------------------------------------------------------------------------------------------------------------------------------------------------------------------------------------------------------------------------------------------------------------------------------------------------------------------------------------------------------------------------------------------------------------------------------------------------------------------------------------------------------------------------------------------------------------------------------------------------------------------------------------------------------------------------------------------------------------------------------------------------------------------------------------------------------------------------------------------------------------------------------------------------------------------------------------------------------------------------------------------------------------------------------------------------------------------------------------------------------------------|---------------------------------------------------------------------------------------------------------------------------------------------------------------------------------------------------------------------------------------------------------------------------------------|-------------------------------------------------------------------------------------------------------------------------------------------------------------------------------------------------------------------------------------------------------------------------------------------------------------------------------------------------------------------------------------------------------------------------------------------------------------------------------------------------------------------------------------------------------------------------------------------------------|------------------------------|---------------------------------|------------------------------|
| GF0049076 | 0                            | 0                         | 1                            | Hypothetical protein (1)                                                       |                                                                                                                                                                                                                                                                                                                                                                                                                                                                                                                                                                                                                                                                                                                                                                                                                                                                                                                                                                                                                                                                                                                                                                                                                                                                                              |                                                                                                                                                                                                                                                                                       | -                                                                                                                                                                                                                                                                                                                                                                                                                                                                                                                                                                                                     | -                            | P_trifoliata_00470_mRNA_26.1    |                              |
| GF0049075 | 0                            | 0                         | 1                            | Hypothetical protein (1)                                                       |                                                                                                                                                                                                                                                                                                                                                                                                                                                                                                                                                                                                                                                                                                                                                                                                                                                                                                                                                                                                                                                                                                                                                                                                                                                                                              |                                                                                                                                                                                                                                                                                       | -                                                                                                                                                                                                                                                                                                                                                                                                                                                                                                                                                                                                     | -                            | P_trifoliata_00470_mRNA_25.1    |                              |
| GF0049074 | 0                            | 0                         | 1                            | Hypothetical protein (1)                                                       |                                                                                                                                                                                                                                                                                                                                                                                                                                                                                                                                                                                                                                                                                                                                                                                                                                                                                                                                                                                                                                                                                                                                                                                                                                                                                              |                                                                                                                                                                                                                                                                                       | -                                                                                                                                                                                                                                                                                                                                                                                                                                                                                                                                                                                                     | -                            | P_trifoliata_00470_mRNA_16.1    |                              |
| GF0049073 | 0                            | 0                         | 1                            | General transcription factor 2-related zinc finger protein (1)                 | nucleic acid binding [GO:0003676 molecular_function] (1)                                                                                                                                                                                                                                                                                                                                                                                                                                                                                                                                                                                                                                                                                                                                                                                                                                                                                                                                                                                                                                                                                                                                                                                                                                     | Domain of unknown function DUF4371 [IPR025398] (1); Ribonuclease H-like domain [IPR012337] (1)                                                                                                                                                                                        | -                                                                                                                                                                                                                                                                                                                                                                                                                                                                                                                                                                                                     | -                            | P_trifoliata_00470_mRNA_15.1    |                              |
| GF0049072 | 0                            | 0                         | 1                            | Hypothetical protein (1)                                                       |                                                                                                                                                                                                                                                                                                                                                                                                                                                                                                                                                                                                                                                                                                                                                                                                                                                                                                                                                                                                                                                                                                                                                                                                                                                                                              |                                                                                                                                                                                                                                                                                       | -                                                                                                                                                                                                                                                                                                                                                                                                                                                                                                                                                                                                     | -                            | P_trifoliata_00469_mRNA_26.1    |                              |
| GF0049071 | 0                            | 0                         | 1                            | Mitochondrial import inner membrane translocase subunit TIM14 (1)              |                                                                                                                                                                                                                                                                                                                                                                                                                                                                                                                                                                                                                                                                                                                                                                                                                                                                                                                                                                                                                                                                                                                                                                                                                                                                                              | DnaJ domain [IPR01623] (1)                                                                                                                                                                                                                                                            | -                                                                                                                                                                                                                                                                                                                                                                                                                                                                                                                                                                                                     | -                            | P_trifoliata_00469_mRNA_21.1    |                              |
| GF0049070 | 0                            | 0                         | 1                            | Hypothetical protein (1)                                                       |                                                                                                                                                                                                                                                                                                                                                                                                                                                                                                                                                                                                                                                                                                                                                                                                                                                                                                                                                                                                                                                                                                                                                                                                                                                                                              | Winged helix-turn-helix DNA-binding domain [IPR011911] (1)                                                                                                                                                                                                                            | -                                                                                                                                                                                                                                                                                                                                                                                                                                                                                                                                                                                                     | -                            | P_trifoliata_00469_mRNA_18.1    |                              |
| GF0049069 | 0                            | 0                         | 1                            | Hypothetical protein (1)                                                       | protein binding [GO:0005515 molecular_function] (1)                                                                                                                                                                                                                                                                                                                                                                                                                                                                                                                                                                                                                                                                                                                                                                                                                                                                                                                                                                                                                                                                                                                                                                                                                                          | Leucine-rich repeat domain, L domain-like [IPR032675] (1); Leucine-rich repeat [IPR00161] (1)                                                                                                                                                                                         | -                                                                                                                                                                                                                                                                                                                                                                                                                                                                                                                                                                                                     | -                            | P_trifoliata_00469_mRNA_17.1    |                              |
| GF0049068 | 0                            | 0                         | 1                            | Hypothetical protein (1)                                                       |                                                                                                                                                                                                                                                                                                                                                                                                                                                                                                                                                                                                                                                                                                                                                                                                                                                                                                                                                                                                                                                                                                                                                                                                                                                                                              |                                                                                                                                                                                                                                                                                       | -                                                                                                                                                                                                                                                                                                                                                                                                                                                                                                                                                                                                     | -                            | P_trifoliata_00469_mRNA_11.1    |                              |
| GF0049067 | 0                            | 0                         | 1                            | Heat shock cognate 70 kDa protein 2 (1)                                        |                                                                                                                                                                                                                                                                                                                                                                                                                                                                                                                                                                                                                                                                                                                                                                                                                                                                                                                                                                                                                                                                                                                                                                                                                                                                                              | Heat shock protein 70 family [IPR013126] (1); Heat shock protein 70kD, C-terminal domain [IPR029048] (1)                                                                                                                                                                              | -                                                                                                                                                                                                                                                                                                                                                                                                                                                                                                                                                                                                     | -                            | P_trifoliata_00468_mRNA_9.1     |                              |
| GF0049066 | 0                            | 0                         | 1                            | Hypothetical protein (1)                                                       | nucleic acid binding [GO:0003676 molecular_function] (1); membrane [GO:0016020 cellular_component] (1); transmembrane transporter activity [GO:0022857 molecular_function] (1); integral component of membrane [GO:0016021 cellular_component] (1)                                                                                                                                                                                                                                                                                                                                                                                                                                                                                                                                                                                                                                                                                                                                                                                                                                                                                                                                                                                                                                           | Ribonuclease H-like domain [IPR012337] (1); Domain of unknown function DUF4371 [IPR025398] (1); EamA domain [IPR000620] (1); WAT1-related protein [IPR030184] (1)                                                                                                                     | -                                                                                                                                                                                                                                                                                                                                                                                                                                                                                                                                                                                                     | -                            | P_trifoliata_00468_mRNA_25.1    |                              |
| GF0049065 | 0                            | 0                         | 1                            | Egg cell-secreted protein 1.4 (1)                                              | structural constituent of ribosome [GO:0003735 molecular_function] (1); signal transduction [GO:0007145 biological_process] (1); intracellular [GO:0005622 cellular_component] (1); intracellular protein transport [GO:0006886 biological_process] (1); translation [GO:0006412 biological_process] (1); GTP binding [GO:0005225 molecular_function] (1); nucleocytoplasmic transport [GO:0006913 biological_process] (1); small GTPase mediated signal transduction [GO:0007264 biological_process] (1); membrane [GO:0016020 cellular_component] (1); transmembrane transporter activity [GO:0022857 molecular_function] (1); thiamine pyrophosphate binding [GO:0030976 molecular_function] (1); oxoglutarate dehydrogenase (succinyl-transfering) activity [GO:0004591 molecular_function] (1); protein transport [GO:0015031 biological_process] (1); oxidation-reduction process [GO:0005114 biological_process] (1); ribosome [GO:0005840 cellular_component] (1); DNA topoisomerase type II (ATP-hydrolyzing) activity [GO:0003918 molecular_function] (1); DNA metabolic process [GO:0006259 biological_process] (1); DNA binding [GO:0005677 molecular_function] (1); DNA topological change [GO:0006265 biological_process] (1); ATP binding [GO:0005524 molecular_function] (1) | Proslamin-like domain [IPR008502] (1)                                                                                                                                                                                                                                                 | Small GTPase superfamily [IPR001806] (1); P-loop containing nucleoside triphosphate hydrolase [IPR027417] (1); Ribosomal protein S8 [IPR000630] (1); Small GTPase superfamily, Rho type [IPR003759] (1); Small GTPase superfamily, ARF type [IPR024156] (1); Ran GTPase [IPR020204] (1); Transketolase-like, pyrimidine-binding domain [IPR005475] (1); Multifunctional 2-oxoglutarate metabolism enzyme, C-terminal [IPR031717] (1); Thiamin diphosphate-binding fold [IPR029061] (1); Small GTPase superfamily, Ras type [IPR020848] (1); 2-oxoglutarate dehydrogenase E1 component [IPR011603] (1) | -                            | -                               | P_trifoliata_00468_mRNA_22.1 |
| GF0049064 | 0                            | 0                         | 1                            | Oxoglutarate dehydrogenase (succinyl-transfering), E1 component, variant 5 (1) |                                                                                                                                                                                                                                                                                                                                                                                                                                                                                                                                                                                                                                                                                                                                                                                                                                                                                                                                                                                                                                                                                                                                                                                                                                                                                              |                                                                                                                                                                                                                                                                                       | -                                                                                                                                                                                                                                                                                                                                                                                                                                                                                                                                                                                                     | -                            | P_trifoliata_00468_mRNA_22.1    |                              |
| GF0049063 | 0                            | 0                         | 1                            | Hypothetical protein (1)                                                       |                                                                                                                                                                                                                                                                                                                                                                                                                                                                                                                                                                                                                                                                                                                                                                                                                                                                                                                                                                                                                                                                                                                                                                                                                                                                                              | IK3 [IPR006849] (1); DNA topoisomerase, type IIa-like domain [IPR013760] (1); DNA topoisomerase, type IIA, subunit AC-terminal [IPR02305] (1); DNA topoisomerase, type IIA, subunit A' C-terminal, alpha-beta [IPR013758] (1)                                                         | -                                                                                                                                                                                                                                                                                                                                                                                                                                                                                                                                                                                                     | -                            | P_trifoliata_00468_mRNA_20.1    |                              |
| GF0049062 | 0                            | 0                         | 1                            | Hypothetical protein (1)                                                       |                                                                                                                                                                                                                                                                                                                                                                                                                                                                                                                                                                                                                                                                                                                                                                                                                                                                                                                                                                                                                                                                                                                                                                                                                                                                                              |                                                                                                                                                                                                                                                                                       | -                                                                                                                                                                                                                                                                                                                                                                                                                                                                                                                                                                                                     | -                            | P_trifoliata_00467_mRNA_24.1    |                              |
| GF0049061 | 0                            | 0                         | 1                            | Hypothetical protein (1)                                                       |                                                                                                                                                                                                                                                                                                                                                                                                                                                                                                                                                                                                                                                                                                                                                                                                                                                                                                                                                                                                                                                                                                                                                                                                                                                                                              |                                                                                                                                                                                                                                                                                       | -                                                                                                                                                                                                                                                                                                                                                                                                                                                                                                                                                                                                     | -                            | P_trifoliata_00467_mRNA_2.1     |                              |
| GF0049060 | 0                            | 0                         | 1                            | Hypothetical protein (1)                                                       |                                                                                                                                                                                                                                                                                                                                                                                                                                                                                                                                                                                                                                                                                                                                                                                                                                                                                                                                                                                                                                                                                                                                                                                                                                                                                              |                                                                                                                                                                                                                                                                                       | -                                                                                                                                                                                                                                                                                                                                                                                                                                                                                                                                                                                                     | -                            | P_trifoliata_00467_mRNA_19.1    |                              |
| GF0049059 | 0                            | 0                         | 1                            | Hypothetical protein (1)                                                       |                                                                                                                                                                                                                                                                                                                                                                                                                                                                                                                                                                                                                                                                                                                                                                                                                                                                                                                                                                                                                                                                                                                                                                                                                                                                                              |                                                                                                                                                                                                                                                                                       | -                                                                                                                                                                                                                                                                                                                                                                                                                                                                                                                                                                                                     | -                            | P_trifoliata_00466_mRNA_12.1    |                              |
| GF0049058 | 0                            | 0                         | 1                            | Hypothetical protein (1)                                                       |                                                                                                                                                                                                                                                                                                                                                                                                                                                                                                                                                                                                                                                                                                                                                                                                                                                                                                                                                                                                                                                                                                                                                                                                                                                                                              |                                                                                                                                                                                                                                                                                       | -                                                                                                                                                                                                                                                                                                                                                                                                                                                                                                                                                                                                     | -                            | P_trifoliata_00465_mRNA_8.1     |                              |
| GF0049057 | 0                            | 0                         | 1                            | Hypothetical protein (1)                                                       | zinc ion binding [GO:0008270 molecular_function] (1); nucleic acid binding [GO:0003676 molecular_function] (1)                                                                                                                                                                                                                                                                                                                                                                                                                                                                                                                                                                                                                                                                                                                                                                                                                                                                                                                                                                                                                                                                                                                                                                               | Domain of unknown function DUF4283 [IPR025558] (1); Zinc knuckle CX2CX4HXAC [IPR025836] (1); Zinc finger, CCHC-type [IPR001878] (1)                                                                                                                                                   | -                                                                                                                                                                                                                                                                                                                                                                                                                                                                                                                                                                                                     | -                            | P_trifoliata_00465_mRNA_7.1     |                              |
| GF0049056 | 0                            | 0                         | 1                            | Hypothetical protein (1)                                                       |                                                                                                                                                                                                                                                                                                                                                                                                                                                                                                                                                                                                                                                                                                                                                                                                                                                                                                                                                                                                                                                                                                                                                                                                                                                                                              | Viral movement protein [IPR028919] (1)                                                                                                                                                                                                                                                | -                                                                                                                                                                                                                                                                                                                                                                                                                                                                                                                                                                                                     | -                            | P_trifoliata_00465_mRNA_6.1     |                              |
| GF0049055 | 0                            | 0                         | 1                            | Hypothetical protein (1)                                                       |                                                                                                                                                                                                                                                                                                                                                                                                                                                                                                                                                                                                                                                                                                                                                                                                                                                                                                                                                                                                                                                                                                                                                                                                                                                                                              |                                                                                                                                                                                                                                                                                       | -                                                                                                                                                                                                                                                                                                                                                                                                                                                                                                                                                                                                     | -                            | P_trifoliata_00465_mRNA_2.1     |                              |
| GF0049054 | 0                            | 0                         | 1                            | Hypothetical protein (1)                                                       |                                                                                                                                                                                                                                                                                                                                                                                                                                                                                                                                                                                                                                                                                                                                                                                                                                                                                                                                                                                                                                                                                                                                                                                                                                                                                              |                                                                                                                                                                                                                                                                                       | -                                                                                                                                                                                                                                                                                                                                                                                                                                                                                                                                                                                                     | -                            | P_trifoliata_00465_mRNA_14.1    |                              |
| GF0049053 | 0                            | 0                         | 1                            | Hypothetical protein (1)                                                       |                                                                                                                                                                                                                                                                                                                                                                                                                                                                                                                                                                                                                                                                                                                                                                                                                                                                                                                                                                                                                                                                                                                                                                                                                                                                                              |                                                                                                                                                                                                                                                                                       | -                                                                                                                                                                                                                                                                                                                                                                                                                                                                                                                                                                                                     | -                            | P_trifoliata_00465_mRNA_12.1    |                              |
| GF0049052 | 0                            | 0                         | 1                            | NADH dehydrogenase subunit 9 (1)                                               | oxidation-reduction process [GO:005114 biological_process] (1); NADH dehydrogenase (ubiquinone) activity [GO:0008137 molecular_function] (1); oxidoreductase activity, acting on NAD(P)H [GO:0016651 molecular_function] (1)                                                                                                                                                                                                                                                                                                                                                                                                                                                                                                                                                                                                                                                                                                                                                                                                                                                                                                                                                                                                                                                                 | NADH:ubiquinone oxidoreductase, 308Da subunit, conserved site [IPR00396] (1); NADH dehydrogenase, subunit C [IPR00218] (1); NADH:ubiquinone oxidoreductase, 308Da subunit [IPR01268] (1)                                                                                              | -                                                                                                                                                                                                                                                                                                                                                                                                                                                                                                                                                                                                     | -                            | P_trifoliata_00464_mRNA_9.1     |                              |
| GF0049051 | 0                            | 0                         | 1                            | Hypothetical protein (1)                                                       |                                                                                                                                                                                                                                                                                                                                                                                                                                                                                                                                                                                                                                                                                                                                                                                                                                                                                                                                                                                                                                                                                                                                                                                                                                                                                              |                                                                                                                                                                                                                                                                                       | -                                                                                                                                                                                                                                                                                                                                                                                                                                                                                                                                                                                                     | -                            | P_trifoliata_00464_mRNA_7.1     |                              |
| GF0049050 | 0                            | 0                         | 1                            | Hypothetical protein (1)                                                       |                                                                                                                                                                                                                                                                                                                                                                                                                                                                                                                                                                                                                                                                                                                                                                                                                                                                                                                                                                                                                                                                                                                                                                                                                                                                                              |                                                                                                                                                                                                                                                                                       | -                                                                                                                                                                                                                                                                                                                                                                                                                                                                                                                                                                                                     | -                            | P_trifoliata_00464_mRNA_5.1     |                              |
| GF0049049 | 0                            | 0                         | 1                            | Hypothetical protein (1)                                                       |                                                                                                                                                                                                                                                                                                                                                                                                                                                                                                                                                                                                                                                                                                                                                                                                                                                                                                                                                                                                                                                                                                                                                                                                                                                                                              |                                                                                                                                                                                                                                                                                       | -                                                                                                                                                                                                                                                                                                                                                                                                                                                                                                                                                                                                     | -                            | P_trifoliata_00464_mRNA_3.1     |                              |
| GF0049048 | 0                            | 0                         | 1                            | Hypothetical protein (1)                                                       |                                                                                                                                                                                                                                                                                                                                                                                                                                                                                                                                                                                                                                                                                                                                                                                                                                                                                                                                                                                                                                                                                                                                                                                                                                                                                              |                                                                                                                                                                                                                                                                                       | -                                                                                                                                                                                                                                                                                                                                                                                                                                                                                                                                                                                                     | -                            | P_trifoliata_00464_mRNA_28.1    |                              |
| GF0049047 | 0                            | 0                         | 1                            | Actin (1)                                                                      |                                                                                                                                                                                                                                                                                                                                                                                                                                                                                                                                                                                                                                                                                                                                                                                                                                                                                                                                                                                                                                                                                                                                                                                                                                                                                              | Actin family [IPR004000] (1)                                                                                                                                                                                                                                                          | -                                                                                                                                                                                                                                                                                                                                                                                                                                                                                                                                                                                                     | -                            | P_trifoliata_00464_mRNA_23.1    |                              |
| GF0049046 | 0                            | 0                         | 1                            | Hypothetical protein (1)                                                       |                                                                                                                                                                                                                                                                                                                                                                                                                                                                                                                                                                                                                                                                                                                                                                                                                                                                                                                                                                                                                                                                                                                                                                                                                                                                                              |                                                                                                                                                                                                                                                                                       | -                                                                                                                                                                                                                                                                                                                                                                                                                                                                                                                                                                                                     | -                            | P_trifoliata_00464_mRNA_19.1    |                              |
| GF0049045 | 0                            | 0                         | 1                            | Hypothetical protein (1)                                                       |                                                                                                                                                                                                                                                                                                                                                                                                                                                                                                                                                                                                                                                                                                                                                                                                                                                                                                                                                                                                                                                                                                                                                                                                                                                                                              |                                                                                                                                                                                                                                                                                       | -                                                                                                                                                                                                                                                                                                                                                                                                                                                                                                                                                                                                     | -                            | P_trifoliata_00464_mRNA_15.1    |                              |
| GF0049044 | 0                            | 0                         | 1                            | Hypothetical protein (1)                                                       |                                                                                                                                                                                                                                                                                                                                                                                                                                                                                                                                                                                                                                                                                                                                                                                                                                                                                                                                                                                                                                                                                                                                                                                                                                                                                              |                                                                                                                                                                                                                                                                                       | -                                                                                                                                                                                                                                                                                                                                                                                                                                                                                                                                                                                                     | -                            | P_trifoliata_00464_mRNA_13.1    |                              |
| GF0049043 | 0                            | 0                         | 1                            | Hypothetical protein (1)                                                       |                                                                                                                                                                                                                                                                                                                                                                                                                                                                                                                                                                                                                                                                                                                                                                                                                                                                                                                                                                                                                                                                                                                                                                                                                                                                                              |                                                                                                                                                                                                                                                                                       | -                                                                                                                                                                                                                                                                                                                                                                                                                                                                                                                                                                                                     | -                            | P_trifoliata_00464_mRNA_12.1    |                              |
| GF0049042 | 0                            | 0                         | 1                            | Hypothetical protein (1)                                                       |                                                                                                                                                                                                                                                                                                                                                                                                                                                                                                                                                                                                                                                                                                                                                                                                                                                                                                                                                                                                                                                                                                                                                                                                                                                                                              |                                                                                                                                                                                                                                                                                       | -                                                                                                                                                                                                                                                                                                                                                                                                                                                                                                                                                                                                     | -                            | P_trifoliata_00464_mRNA_11.1    |                              |
| GF0049041 | 0                            | 0                         | 1                            | Hypothetical protein (1)                                                       |                                                                                                                                                                                                                                                                                                                                                                                                                                                                                                                                                                                                                                                                                                                                                                                                                                                                                                                                                                                                                                                                                                                                                                                                                                                                                              |                                                                                                                                                                                                                                                                                       | -                                                                                                                                                                                                                                                                                                                                                                                                                                                                                                                                                                                                     | -                            | P_trifoliata_00464_mRNA_10.1    |                              |
| GF0049040 | 0                            | 0                         | 1                            | Hypothetical protein (1)                                                       |                                                                                                                                                                                                                                                                                                                                                                                                                                                                                                                                                                                                                                                                                                                                                                                                                                                                                                                                                                                                                                                                                                                                                                                                                                                                                              |                                                                                                                                                                                                                                                                                       | -                                                                                                                                                                                                                                                                                                                                                                                                                                                                                                                                                                                                     | -                            | P_trifoliata_00463_mRNA_4.1     |                              |
| GF0049039 | 0                            | 0                         | 1                            | Hypothetical protein (1)                                                       |                                                                                                                                                                                                                                                                                                                                                                                                                                                                                                                                                                                                                                                                                                                                                                                                                                                                                                                                                                                                                                                                                                                                                                                                                                                                                              |                                                                                                                                                                                                                                                                                       | -                                                                                                                                                                                                                                                                                                                                                                                                                                                                                                                                                                                                     | -                            | P_trifoliata_00463_mRNA_3.1     |                              |
| GF0049038 | 0                            | 0                         | 1                            | Ankyrin repeat family protein (1)                                              |                                                                                                                                                                                                                                                                                                                                                                                                                                                                                                                                                                                                                                                                                                                                                                                                                                                                                                                                                                                                                                                                                                                                                                                                                                                                                              | Ankyrin repeat-containing domain [IPR00651] (1); POG domain [IPR026961] (1)                                                                                                                                                                                                           | -                                                                                                                                                                                                                                                                                                                                                                                                                                                                                                                                                                                                     | -                            | P_trifoliata_00463_mRNA_29.1    |                              |
| GF0049037 | 0                            | 0                         | 1                            | Hypothetical protein (1)                                                       |                                                                                                                                                                                                                                                                                                                                                                                                                                                                                                                                                                                                                                                                                                                                                                                                                                                                                                                                                                                                                                                                                                                                                                                                                                                                                              |                                                                                                                                                                                                                                                                                       | -                                                                                                                                                                                                                                                                                                                                                                                                                                                                                                                                                                                                     | -                            | P_trifoliata_00463_mRNA_28.1    |                              |
| GF0049036 | 0                            | 0                         | 1                            | Hypothetical protein (1)                                                       |                                                                                                                                                                                                                                                                                                                                                                                                                                                                                                                                                                                                                                                                                                                                                                                                                                                                                                                                                                                                                                                                                                                                                                                                                                                                                              | Nucleoporin, Nup133/Nup155-like, N-terminal [IPR014908] (1)                                                                                                                                                                                                                           | -                                                                                                                                                                                                                                                                                                                                                                                                                                                                                                                                                                                                     | -                            | P_trifoliata_00463_mRNA_27.1    |                              |
| GF0049035 | 0                            | 0                         | 1                            | Hypothetical protein (1)                                                       |                                                                                                                                                                                                                                                                                                                                                                                                                                                                                                                                                                                                                                                                                                                                                                                                                                                                                                                                                                                                                                                                                                                                                                                                                                                                                              |                                                                                                                                                                                                                                                                                       | -                                                                                                                                                                                                                                                                                                                                                                                                                                                                                                                                                                                                     | -                            | P_trifoliata_00463_mRNA_2.1     |                              |
| GF0049034 | 0                            | 0                         | 1                            | Lipoygenase (1)                                                                | metal ion binding [GO:0046872 molecular_function] (1); oxidoreductase activity, acting on single donors with incorporation of molecular oxygen, incorporation of two atoms of oxygen [GO:0016702 molecular_function] (1); oxidoreductase activity [GO:0016491 molecular_function] (1); oxidation-reduction process [GO:005114 biological_process] (1)                                                                                                                                                                                                                                                                                                                                                                                                                                                                                                                                                                                                                                                                                                                                                                                                                                                                                                                                        | Lipoygenase, plant [IPR001246] (1); Lipoygenase [IPR000907] (1); Lipoygenase, domain 3 [IPR027433] (1); Lipoygenase, C-terminal [IPR013819] (1)                                                                                                                                       | -                                                                                                                                                                                                                                                                                                                                                                                                                                                                                                                                                                                                     | -                            | P_trifoliata_00463_mRNA_13.1    |                              |
| GF0049033 | 0                            | 0                         | 1                            | Hypothetical protein (1)                                                       |                                                                                                                                                                                                                                                                                                                                                                                                                                                                                                                                                                                                                                                                                                                                                                                                                                                                                                                                                                                                                                                                                                                                                                                                                                                                                              | Domain of unknown function DUF4283 [IPR025558] (1); Zinc knuckle CX2CX4HXAC [IPR025836] (1)                                                                                                                                                                                           | -                                                                                                                                                                                                                                                                                                                                                                                                                                                                                                                                                                                                     | -                            | P_trifoliata_00462_mRNA_7.1     |                              |
| GF0049032 | 0                            | 0                         | 1                            | Hypothetical protein (1)                                                       |                                                                                                                                                                                                                                                                                                                                                                                                                                                                                                                                                                                                                                                                                                                                                                                                                                                                                                                                                                                                                                                                                                                                                                                                                                                                                              |                                                                                                                                                                                                                                                                                       | -                                                                                                                                                                                                                                                                                                                                                                                                                                                                                                                                                                                                     | -                            | P_trifoliata_00462_mRNA_6.1     |                              |
| GF0049031 | 0                            | 0                         | 1                            | Male germ cell-associated kinase (1)                                           | protein kinase activity [GO:0004672 molecular_function] (1); protein phosphorylation [GO:0006468 biological_process] (1); ATP binding [GO:0005524 molecular_function] (1); oxidoreductase activity [GO:0016491 molecular_function] (1); oxidation-reduction process [GO:005114 biological_process] (1); carboxylic acid metabolic process [GO:0019752 biological_process] (1); oxidoreductase activity, acting on the C1a-OH group of donors, NAD or NADP as acceptor [GO:0016616 molecular_function] (1); carbohydrate metabolic process [GO:0005975 biological_process] (1); catalytic activity [GO:0003824 molecular_function] (1)                                                                                                                                                                                                                                                                                                                                                                                                                                                                                                                                                                                                                                                        | Protein kinase domain [IPR000719] (1); Protein kinase-like domain [IPR011009] (1); Serine/threonine/dual specificity protein kinase, catalytic domain [IPR02290] (1)                                                                                                                  | -                                                                                                                                                                                                                                                                                                                                                                                                                                                                                                                                                                                                     | -                            | P_trifoliata_00462_mRNA_3.1     |                              |
| GF0049030 | 0                            | 0                         | 1                            | L-lactate dehydrogenase A (1)                                                  |                                                                                                                                                                                                                                                                                                                                                                                                                                                                                                                                                                                                                                                                                                                                                                                                                                                                                                                                                                                                                                                                                                                                                                                                                                                                                              | L-lactate/malate dehydrogenase [IPR001557] (1); NAD(P)-binding domain [IPR016040] (1); Lactate dehydrogenase:glycose hydrolase, family 4, C-terminal [IPR015955] (1); Lactate/malate dehydrogenase, N-terminal [IPR001236] (1)                                                        | -                                                                                                                                                                                                                                                                                                                                                                                                                                                                                                                                                                                                     | -                            | P_trifoliata_00462_mRNA_25.1    |                              |
| GF0049029 | 0                            | 0                         | 1                            | Hypothetical protein (1)                                                       |                                                                                                                                                                                                                                                                                                                                                                                                                                                                                                                                                                                                                                                                                                                                                                                                                                                                                                                                                                                                                                                                                                                                                                                                                                                                                              |                                                                                                                                                                                                                                                                                       | -                                                                                                                                                                                                                                                                                                                                                                                                                                                                                                                                                                                                     | -                            | P_trifoliata_00462_mRNA_23.1    |                              |
| GF0049028 | 0                            | 0                         | 1                            | Hypothetical protein (1)                                                       |                                                                                                                                                                                                                                                                                                                                                                                                                                                                                                                                                                                                                                                                                                                                                                                                                                                                                                                                                                                                                                                                                                                                                                                                                                                                                              |                                                                                                                                                                                                                                                                                       | -                                                                                                                                                                                                                                                                                                                                                                                                                                                                                                                                                                                                     | -                            | P_trifoliata_00462_mRNA_14.1    |                              |
| GF0049027 | 0                            | 0                         | 1                            | Hypothetical protein (1)                                                       |                                                                                                                                                                                                                                                                                                                                                                                                                                                                                                                                                                                                                                                                                                                                                                                                                                                                                                                                                                                                                                                                                                                                                                                                                                                                                              |                                                                                                                                                                                                                                                                                       | -                                                                                                                                                                                                                                                                                                                                                                                                                                                                                                                                                                                                     | -                            | P_trifoliata_00462_mRNA_12.1    |                              |
| GF0049026 | 0                            | 0                         | 1                            | Cdf division control protein 2 homolog (1)                                     | protein phosphorylation [GO:0006468 biological_process] (1); protein kinase activity [GO:0004672 molecular_function] (1); ATP binding [GO:0005524 molecular_function] (1)                                                                                                                                                                                                                                                                                                                                                                                                                                                                                                                                                                                                                                                                                                                                                                                                                                                                                                                                                                                                                                                                                                                    | Serine/threonine/dual specificity protein kinase, catalytic domain [IPR02290] (1); Serine/threonine-protein kinase, active site [IPR008271] (1); Protein kinase, ATP binding site [IPR017441] (1); Protein kinase domain [IPR0000719] (1); Protein kinase-like domain [IPR011009] (1) | -                                                                                                                                                                                                                                                                                                                                                                                                                                                                                                                                                                                                     | -                            | P_trifoliata_00462_mRNA_10.1    |                              |
| GF0049025 | 0                            | 0                         | 1                            | Hypothetical protein (1)                                                       |                                                                                                                                                                                                                                                                                                                                                                                                                                                                                                                                                                                                                                                                                                                                                                                                                                                                                                                                                                                                                                                                                                                                                                                                                                                                                              |                                                                                                                                                                                                                                                                                       | -                                                                                                                                                                                                                                                                                                                                                                                                                                                                                                                                                                                                     | -                            | P_trifoliata_00461_mRNA_9.1     |                              |

| ID        | Num. in <i>C. clementiae</i> | Num. in <i>C. autohii</i> | Num. in <i>P. trifoliata</i> | Note                                                               | GO                                                                                                                                                                                                                      | InterPro                                                                                                                                                                                                                                                                                                                    | Members in <i>C. clementiae</i> | Members in <i>C. autohii</i> | Members in <i>P. trifoliata</i> |
|-----------|------------------------------|---------------------------|------------------------------|--------------------------------------------------------------------|-------------------------------------------------------------------------------------------------------------------------------------------------------------------------------------------------------------------------|-----------------------------------------------------------------------------------------------------------------------------------------------------------------------------------------------------------------------------------------------------------------------------------------------------------------------------|---------------------------------|------------------------------|---------------------------------|
| GF0049024 | 0                            | 0                         | 1                            | Hypothetical protein (1)                                           |                                                                                                                                                                                                                         |                                                                                                                                                                                                                                                                                                                             | -                               | -                            | P_trifoliata_00461_mRNA_8,1     |
| GF0049023 | 0                            | 0                         | 1                            | Hypothetical protein (1)                                           |                                                                                                                                                                                                                         |                                                                                                                                                                                                                                                                                                                             | -                               | -                            | P_trifoliata_00461_mRNA_17,1    |
| GF0049022 | 0                            | 0                         | 1                            | Hypothetical protein (1)                                           |                                                                                                                                                                                                                         |                                                                                                                                                                                                                                                                                                                             | -                               | -                            | P_trifoliata_00461_mRNA_15,1    |
| GF0049021 | 0                            | 0                         | 1                            | Hypothetical protein (1)                                           |                                                                                                                                                                                                                         |                                                                                                                                                                                                                                                                                                                             | -                               | -                            | P_trifoliata_00461_mRNA_14,1    |
| GF0049020 | 0                            | 0                         | 1                            | Hypothetical protein (1)                                           |                                                                                                                                                                                                                         |                                                                                                                                                                                                                                                                                                                             | -                               | -                            | P_trifoliata_00461_mRNA_13,1    |
| GF0049019 | 0                            | 0                         | 1                            | Hypothetical protein (1)                                           |                                                                                                                                                                                                                         |                                                                                                                                                                                                                                                                                                                             | -                               | -                            | P_trifoliata_00461_mRNA_11,1    |
| GF0049018 | 0                            | 0                         | 1                            | Hypothetical protein (1)                                           |                                                                                                                                                                                                                         |                                                                                                                                                                                                                                                                                                                             | -                               | -                            | P_trifoliata_00461_mRNA_1,1     |
| GF0049017 | 0                            | 0                         | 1                            | Hypothetical protein (1)                                           |                                                                                                                                                                                                                         |                                                                                                                                                                                                                                                                                                                             | -                               | -                            | P_trifoliata_00460_mRNA_5,1     |
| GF0049016 | 0                            | 0                         | 1                            | Hypothetical protein (1)                                           |                                                                                                                                                                                                                         |                                                                                                                                                                                                                                                                                                                             | -                               | -                            | P_trifoliata_00460_mRNA_4,1     |
| GF0049015 | 0                            | 0                         | 1                            | Hypothetical protein (1)                                           |                                                                                                                                                                                                                         |                                                                                                                                                                                                                                                                                                                             | -                               | -                            | P_trifoliata_00460_mRNA_19,1    |
| GF0049014 | 0                            | 0                         | 1                            | Hypothetical protein (1)                                           |                                                                                                                                                                                                                         |                                                                                                                                                                                                                                                                                                                             | -                               | -                            | P_trifoliata_00460_mRNA_13,1    |
| GF0049013 | 0                            | 0                         | 1                            | Hypothetical protein (1)                                           |                                                                                                                                                                                                                         |                                                                                                                                                                                                                                                                                                                             | -                               | -                            | P_trifoliata_00460_mRNA_12,1    |
| GF0049012 | 0                            | 0                         | 1                            | Hypothetical protein (1)                                           |                                                                                                                                                                                                                         |                                                                                                                                                                                                                                                                                                                             | -                               | -                            | P_trifoliata_00460_mRNA_10,1    |
| GF0049011 | 0                            | 0                         | 1                            | Hypothetical protein (1)                                           |                                                                                                                                                                                                                         |                                                                                                                                                                                                                                                                                                                             | -                               | -                            | P_trifoliata_00460_mRNA_1,1     |
| GF0049010 | 0                            | 0                         | 1                            | Hypothetical protein (1)                                           |                                                                                                                                                                                                                         |                                                                                                                                                                                                                                                                                                                             | -                               | -                            | P_trifoliata_00459_mRNA_9,1     |
| GF0049009 | 0                            | 0                         | 1                            | Hypothetical protein (1)                                           |                                                                                                                                                                                                                         |                                                                                                                                                                                                                                                                                                                             | -                               | -                            | P_trifoliata_00459_mRNA_7,1     |
| GF0049008 | 0                            | 0                         | 1                            | Hypothetical protein (1)                                           |                                                                                                                                                                                                                         |                                                                                                                                                                                                                                                                                                                             | -                               | -                            | P_trifoliata_00459_mRNA_12,1    |
| GF0049007 | 0                            | 0                         | 1                            | Hypothetical protein (1)                                           |                                                                                                                                                                                                                         |                                                                                                                                                                                                                                                                                                                             | -                               | -                            | P_trifoliata_00458_mRNA_31,1    |
| GF0049006 | 0                            | 0                         | 1                            | Hypothetical protein (1)                                           |                                                                                                                                                                                                                         |                                                                                                                                                                                                                                                                                                                             | -                               | -                            | P_trifoliata_00458_mRNA_27,1    |
| GF0049005 | 0                            | 0                         | 1                            | Hypothetical protein (1)                                           |                                                                                                                                                                                                                         |                                                                                                                                                                                                                                                                                                                             | -                               | -                            | P_trifoliata_00458_mRNA_26,1    |
| GF0049004 | 0                            | 0                         | 1                            | Hypothetical protein (1)                                           |                                                                                                                                                                                                                         | Domain of unknown function DUF4283 [IPRO2558] (1)                                                                                                                                                                                                                                                                           | -                               | -                            | P_trifoliata_00458_mRNA_25,1    |
| GF0049003 | 0                            | 0                         | 1                            | Hypothetical protein (1)                                           |                                                                                                                                                                                                                         |                                                                                                                                                                                                                                                                                                                             | -                               | -                            | P_trifoliata_00458_mRNA_24,1    |
| GF0049002 | 0                            | 0                         | 1                            | Hypothetical protein (1)                                           |                                                                                                                                                                                                                         |                                                                                                                                                                                                                                                                                                                             | -                               | -                            | P_trifoliata_00458_mRNA_22,1    |
| GF0049001 | 0                            | 0                         | 1                            | Hypothetical protein (1)                                           |                                                                                                                                                                                                                         |                                                                                                                                                                                                                                                                                                                             | -                               | -                            | P_trifoliata_00458_mRNA_21,1    |
| GF0049000 | 0                            | 0                         | 1                            | Hypothetical protein (1)                                           |                                                                                                                                                                                                                         |                                                                                                                                                                                                                                                                                                                             | -                               | -                            | P_trifoliata_00458_mRNA_19,1    |
| GF0048999 | 0                            | 0                         | 1                            | Hypothetical protein (1)                                           | oxidoreductase activity [GO:0016491]<br>molecular_function (1); metabolic process [GO:0008152]<br>biological_process (1)                                                                                                | NAD(P)-binding domain [IPRO16640] (1); Glucose/ribitol dehydrogenase [IPRO2347] (1); Short-chain dehydrogenase/reductase SDR [IPRO2198] (1)                                                                                                                                                                                 | -                               | -                            | P_trifoliata_00458_mRNA_18,1    |
| GF0048998 | 0                            | 0                         | 1                            | Hypothetical protein (1)                                           |                                                                                                                                                                                                                         |                                                                                                                                                                                                                                                                                                                             | -                               | -                            | P_trifoliata_00457_mRNA_7,1     |
| GF0048997 | 0                            | 0                         | 1                            | Hypothetical protein (1)                                           |                                                                                                                                                                                                                         |                                                                                                                                                                                                                                                                                                                             | -                               | -                            | P_trifoliata_00457_mRNA_6,1     |
| GF0048996 | 0                            | 0                         | 1                            | Hypothetical protein (1)                                           |                                                                                                                                                                                                                         |                                                                                                                                                                                                                                                                                                                             | -                               | -                            | P_trifoliata_00457_mRNA_5,1     |
| GF0048995 | 0                            | 0                         | 1                            | Hypothetical protein (1)                                           |                                                                                                                                                                                                                         | P-loop containing nucleoside triphosphate hydrolase [IPRO27417] (1)                                                                                                                                                                                                                                                         | -                               | -                            | P_trifoliata_00457_mRNA_3,1     |
| GF0048994 | 0                            | 0                         | 1                            | Hypothetical protein (1)                                           | nucleus [GO:0005634]<br>cellular_component (1); ribosome biogenesis [GO:0042254]<br>biological_process (1)                                                                                                              | P-loop containing nucleoside triphosphate hydrolase [IPRO27417] (1); AARF3CN [IPRO12948] (1)                                                                                                                                                                                                                                | -                               | -                            | P_trifoliata_00457_mRNA_19,1    |
| GF0048993 | 0                            | 0                         | 1                            | RNA-directed DNA polymerase (Reverse transcriptase) (1)            |                                                                                                                                                                                                                         | Reverse transcriptase domain [IPRO00477] (1)                                                                                                                                                                                                                                                                                | -                               | -                            | P_trifoliata_00457_mRNA_18,1    |
| GF0048992 | 0                            | 0                         | 1                            | Hypothetical protein (1)                                           |                                                                                                                                                                                                                         |                                                                                                                                                                                                                                                                                                                             | -                               | -                            | P_trifoliata_00457_mRNA_16,1    |
| GF0048991 | 0                            | 0                         | 1                            | Hypothetical protein (1)                                           |                                                                                                                                                                                                                         |                                                                                                                                                                                                                                                                                                                             | -                               | -                            | P_trifoliata_00457_mRNA_15,1    |
| GF0048990 | 0                            | 0                         | 1                            | Hypothetical protein (1)                                           |                                                                                                                                                                                                                         |                                                                                                                                                                                                                                                                                                                             | -                               | -                            | P_trifoliata_00457_mRNA_14,1    |
| GF0048989 | 0                            | 0                         | 1                            | Hypothetical protein (1)                                           |                                                                                                                                                                                                                         | Domain of unknown function DUF4283 [IPRO2558] (1); Endonuclease/exonuclease/phosphatase [IPRO05135] (1)                                                                                                                                                                                                                     | -                               | -                            | P_trifoliata_00457_mRNA_12,1    |
| GF0048988 | 0                            | 0                         | 1                            | Hypothetical protein (1)                                           |                                                                                                                                                                                                                         |                                                                                                                                                                                                                                                                                                                             | -                               | -                            | P_trifoliata_00457_mRNA_10,1    |
| GF0048987 | 0                            | 0                         | 1                            | Hypothetical protein (1)                                           |                                                                                                                                                                                                                         | P-loop containing nucleoside triphosphate hydrolase [IPRO27417] (1)                                                                                                                                                                                                                                                         | -                               | -                            | P_trifoliata_00457_mRNA_1,1     |
| GF0048986 | 0                            | 0                         | 1                            | GlaA (1)                                                           | hydrolase activity, hydrolyzing O-glycosyl compounds [GO:0004553]<br>molecular_function (1); carbohydrate metabolic process [GO:0005975]<br>biological_process (1)                                                      | Glycoside hydrolase, family 3, N-terminal [IPRO01764] (1); Glycoside hydrolase family 3 [IPRO26892] (1); Glycoside hydrolase superfamily [IPRO17853] (1)                                                                                                                                                                    | -                               | -                            | P_trifoliata_00456_mRNA_9,1     |
| GF0048985 | 0                            | 0                         | 1                            | Hypothetical protein (1)                                           | nucleic acid binding [GO:0003676]<br>molecular_function (1)                                                                                                                                                             | Ribonuclease-H-like domain [IPRO12337] (1)                                                                                                                                                                                                                                                                                  | -                               | -                            | P_trifoliata_00456_mRNA_8,1     |
| GF0048984 | 0                            | 0                         | 1                            | Hypothetical protein (1)                                           |                                                                                                                                                                                                                         |                                                                                                                                                                                                                                                                                                                             | -                               | -                            | P_trifoliata_00456_mRNA_7,1     |
| GF0048983 | 0                            | 0                         | 1                            | Hypothetical protein (1)                                           |                                                                                                                                                                                                                         |                                                                                                                                                                                                                                                                                                                             | -                               | -                            | P_trifoliata_00456_mRNA_6,1     |
| GF0048982 | 0                            | 0                         | 1                            | Hypothetical protein (1)                                           |                                                                                                                                                                                                                         |                                                                                                                                                                                                                                                                                                                             | -                               | -                            | P_trifoliata_00456_mRNA_5,1     |
| GF0048981 | 0                            | 0                         | 1                            | LRR receptor-like kinase (1)                                       | protein binding [GO:0005515]<br>molecular_function (1)                                                                                                                                                                  | Leucine-rich repeat [IPRO01611] (1); Leucine-rich repeat-containing N-terminal, plant-type [IPRO13210] (1); Leucine-rich repeat domain, L domain-like [IPRO32675] (1); Leucine-rich repeat, typical subtype [IPRO03591] (1)                                                                                                 | -                               | -                            | P_trifoliata_00456_mRNA_22,1    |
| GF0048980 | 0                            | 0                         | 1                            | Hypothetical protein (1)                                           |                                                                                                                                                                                                                         |                                                                                                                                                                                                                                                                                                                             | -                               | -                            | P_trifoliata_00456_mRNA_2,1     |
| GF0048979 | 0                            | 0                         | 1                            | Glycosyl hydrolase 9B1 isoform 2 (1)                               | hydrolase activity, hydrolyzing O-glycosyl compounds [GO:0004553]<br>molecular_function (1); catalytic activity [GO:0003824 molecular_function] (1); carbohydrate metabolic process [GO:0005975 biological_process] (1) | Glycoside hydrolase family 9 [IPRO01701] (1); Six-hairpin glycosidase [IPRO12341] (1); Six-hairpin glycosidase-like [IPRO08928] (1)                                                                                                                                                                                         | -                               | -                            | P_trifoliata_00456_mRNA_19,1    |
| GF0048978 | 0                            | 0                         | 1                            | Sucrose 6F-phosphate phosphohydrolase family protein isoform 3 (1) | sucrose biosynthetic process [GO:0005986 biological_process] (1); sucrose 6F-phosphate phosphatase activity [GO:0005907 molecular_function] (1); magnesium ion binding [GO:0000287 molecular_function] (1)              | HAD-sugarfamily hydrolase, subfamily IIB [IPRO06379] (1); Sucrose-6-phosphate phosphohydrolase, C-terminal [IPRO13679] (1); Sucrose-phosphate synthase [IPRO06380] (1); Sucrose phosphatase, plant/cyanobacteria [IPRO12847] (1); HAD-like domain [IPRO3214] (1); Leucine-rich repeat domain, L domain-like [IPRO32675] (1) | -                               | -                            | P_trifoliata_00456_mRNA_18,1    |
| GF0048977 | 0                            | 0                         | 1                            | Hypothetical protein (1)                                           |                                                                                                                                                                                                                         | MULE transposase domain [IPRO18289] (1)                                                                                                                                                                                                                                                                                     | -                               | -                            | P_trifoliata_00456_mRNA_17,1    |
| GF0048976 | 0                            | 0                         | 1                            | Hypothetical protein (1)                                           |                                                                                                                                                                                                                         | Endonuclease/exonuclease/phosphatase [IPRO05135] (1)                                                                                                                                                                                                                                                                        | -                               | -                            | P_trifoliata_00456_mRNA_12,1    |
| GF0048975 | 0                            | 0                         | 1                            | Glycosyl hydrolase family protein isoform (1)                      | carbohydrate metabolic process [GO:0005975 biological_process] (1); hydrolase activity, hydrolyzing O-glycosyl compounds [GO:0004553 molecular_function] (1)                                                            | Glycoside hydrolase, family 3, N-terminal [IPRO01764] (1); Glycoside hydrolase family 3 [IPRO26892] (1); Glycoside hydrolase family 3 C-terminal domain [IPRO02772] (1); Glycoside hydrolase superfamily [IPRO17853] (1)                                                                                                    | -                               | -                            | P_trifoliata_00456_mRNA_10,1    |
| GF0048974 | 0                            | 0                         | 1                            | Hypothetical protein (1)                                           | nucleic acid binding [GO:0003676]<br>molecular_function (1)                                                                                                                                                             | Ribonuclease-H-like domain [IPRO12337] (1)                                                                                                                                                                                                                                                                                  | -                               | -                            | P_trifoliata_00455_mRNA_8,1     |
| GF0048973 | 0                            | 0                         | 1                            | Hypothetical protein (1)                                           |                                                                                                                                                                                                                         |                                                                                                                                                                                                                                                                                                                             | -                               | -                            | P_trifoliata_00455_mRNA_5,1     |
| GF0048972 | 0                            | 0                         | 1                            | Hypothetical protein (1)                                           |                                                                                                                                                                                                                         |                                                                                                                                                                                                                                                                                                                             | -                               | -                            | P_trifoliata_00455_mRNA_3,1     |
| GF0048971 | 0                            | 0                         | 1                            | Hypothetical protein (1)                                           |                                                                                                                                                                                                                         |                                                                                                                                                                                                                                                                                                                             | -                               | -                            | P_trifoliata_00455_mRNA_22,1    |
| GF0048970 | 0                            | 0                         | 1                            | Hypothetical protein (1)                                           |                                                                                                                                                                                                                         |                                                                                                                                                                                                                                                                                                                             | -                               | -                            | P_trifoliata_00455_mRNA_1,1     |
| GF0048969 | 0                            | 0                         | 1                            | Hypothetical protein (1)                                           |                                                                                                                                                                                                                         | Transposon, En/Spm-like [IPRO04242] (1); Transposase-associated domain [IPRO29480] (1)                                                                                                                                                                                                                                      | -                               | -                            | P_trifoliata_00454_mRNA_8,1     |
| GF0048968 | 0                            | 0                         | 1                            | Hypothetical protein (1)                                           |                                                                                                                                                                                                                         |                                                                                                                                                                                                                                                                                                                             | -                               | -                            | P_trifoliata_00454_mRNA_4,1     |
| GF0048967 | 0                            | 0                         | 1                            | Hypothetical protein (1)                                           |                                                                                                                                                                                                                         |                                                                                                                                                                                                                                                                                                                             | -                               | -                            | P_trifoliata_00454_mRNA_3,1     |
| GF0048966 | 0                            | 0                         | 1                            | Hypothetical protein (1)                                           | DNA binding [GO:0003677]<br>molecular_function (1)                                                                                                                                                                      | Zinc finger, BED-type [IPRO03656] (1)                                                                                                                                                                                                                                                                                       | -                               | -                            | P_trifoliata_00454_mRNA_20,1    |
| GF0048965 | 0                            | 0                         | 1                            | Hypothetical protein (1)                                           |                                                                                                                                                                                                                         |                                                                                                                                                                                                                                                                                                                             | -                               | -                            | P_trifoliata_00454_mRNA_14,1    |
| GF0048964 | 0                            | 0                         | 1                            | Hypothetical protein (1)                                           |                                                                                                                                                                                                                         |                                                                                                                                                                                                                                                                                                                             | -                               | -                            | P_trifoliata_00454_mRNA_11,1    |
| GF0048963 | 0                            | 0                         | 1                            | Hypothetical protein (1)                                           |                                                                                                                                                                                                                         |                                                                                                                                                                                                                                                                                                                             | -                               | -                            | P_trifoliata_00454_mRNA_10,1    |
| GF0048962 | 0                            | 0                         | 1                            | Hypothetical leucine rich repeat protein (1)                       | protein binding [GO:0005515]<br>molecular_function (1)                                                                                                                                                                  | Leucine-rich repeat [IPRO01611] (1); Leucine-rich repeat domain, L domain-like [IPRO32675] (1)                                                                                                                                                                                                                              | -                               | -                            | P_trifoliata_00453_mRNA_8,1     |
| GF0048961 | 0                            | 0                         | 1                            | Hypothetical protein (1)                                           |                                                                                                                                                                                                                         | Nucleoporin, Nup133/Nup155-like, N-terminal [IPRO14908] (1)                                                                                                                                                                                                                                                                 | -                               | -                            | P_trifoliata_00453_mRNA_6,1     |
| GF0048960 | 0                            | 0                         | 1                            | Hypothetical protein (1)                                           |                                                                                                                                                                                                                         |                                                                                                                                                                                                                                                                                                                             | -                               | -                            | P_trifoliata_00453_mRNA_4,1     |
| GF0048959 | 0                            | 0                         | 1                            | Hypothetical protein (1)                                           |                                                                                                                                                                                                                         | Endonuclease/exonuclease/phosphatase [IPRO05135] (1)                                                                                                                                                                                                                                                                        | -                               | -                            | P_trifoliata_00453_mRNA_21,1    |
| GF0048958 | 0                            | 0                         | 1                            | Hypothetical protein (1)                                           |                                                                                                                                                                                                                         |                                                                                                                                                                                                                                                                                                                             | -                               | -                            | P_trifoliata_00453_mRNA_20,1    |
| GF0048957 | 0                            | 0                         | 1                            | Hypothetical protein (1)                                           |                                                                                                                                                                                                                         |                                                                                                                                                                                                                                                                                                                             | -                               | -                            | P_trifoliata_00453_mRNA_19,1    |
| GF0048956 | 0                            | 0                         | 1                            | Hypothetical protein (1)                                           |                                                                                                                                                                                                                         |                                                                                                                                                                                                                                                                                                                             | -                               | -                            | P_trifoliata_00453_mRNA_18,1    |
| GF0048955 | 0                            | 0                         | 1                            | Hypothetical protein (1)                                           |                                                                                                                                                                                                                         |                                                                                                                                                                                                                                                                                                                             | -                               | -                            | P_trifoliata_00453_mRNA_17,1    |
| GF0048954 | 0                            | 0                         | 1                            | Hypothetical protein (1)                                           |                                                                                                                                                                                                                         | Leucine-rich repeat domain, L domain-like [IPRO32675] (1)                                                                                                                                                                                                                                                                   | -                               | -                            | P_trifoliata_00453_mRNA_12,1    |
| GF0048953 | 0                            | 0                         | 1                            | Nudix hydrolase 20, chloroplastic (1)                              | hydrolase activity [GO:0016787]<br>molecular_function (1)                                                                                                                                                               | NUDX hydrolase domain-like [IPRO15797] (1); NUDIX hydrolase domain [IPRO0686] (1); Domain of unknown function DUF4743 [IPRO1804] (1)                                                                                                                                                                                        | -                               | -                            | P_trifoliata_00452_mRNA_7,1     |
| GF0048952 | 0                            | 0                         | 1                            | Hypothetical protein (1)                                           | hydro-lyase activity [GO:0016836]<br>molecular_function (1)                                                                                                                                                             | CiP/ectonuclein-like domain [IPRO29045] (1); Enoyl-CoA hydratase/isomerase, HIBYL-CoA-II type [IPRO22259] (1); Alpha/Beta hydrolase fold [IPRO29058] (1); Alpha/Beta hydrolase fold-I [IPRO00073] (1)                                                                                                                       | -                               | -                            | P_trifoliata_00452_mRNA_6,1     |
| GF0048951 | 0                            | 0                         | 1                            | Hypothetical protein (1)                                           |                                                                                                                                                                                                                         |                                                                                                                                                                                                                                                                                                                             | -                               | -                            | P_trifoliata_00452_mRNA_22,1    |
| GF0048950 | 0                            | 0                         | 1                            | Hypothetical protein (1)                                           |                                                                                                                                                                                                                         |                                                                                                                                                                                                                                                                                                                             | -                               | -                            | P_trifoliata_00452_mRNA_21,1    |
| GF0048949 | 0                            | 0                         | 1                            | Hypothetical protein (1)                                           |                                                                                                                                                                                                                         | Viral movement protein [IPRO28919] (1)                                                                                                                                                                                                                                                                                      | -                               | -                            | P_trifoliata_00452_mRNA_19,1    |
| GF0048948 | 0                            | 0                         | 1                            | Cytokinin riboside 5'-monophosphate phosphohydrolase (1)           |                                                                                                                                                                                                                         |                                                                                                                                                                                                                                                                                                                             | -                               | -                            | P_trifoliata_00452_mRNA_18,1    |
| GF0048947 | 0                            | 0                         | 1                            | Hypothetical protein (1)                                           |                                                                                                                                                                                                                         |                                                                                                                                                                                                                                                                                                                             | -                               | -                            | P_trifoliata_00452_mRNA_14,1    |
| GF0048946 | 0                            | 0                         | 1                            | Hypothetical protein (1)                                           |                                                                                                                                                                                                                         |                                                                                                                                                                                                                                                                                                                             | -                               | -                            | P_trifoliata_00451_mRNA_8,1     |

| ID        | Num. in <i>C. clementiae</i> | Num. in <i>C. canthii</i> | Num. in <i>P. trifoliata</i> | Note                                                   | GO                                                                                                                                                                                                                                                                                                               | InterPro                                                                                                                                                                                                                                      | Members in <i>C. clementiae</i> | Members in <i>C. canthii</i> | Members in <i>P. trifoliata</i> |
|-----------|------------------------------|---------------------------|------------------------------|--------------------------------------------------------|------------------------------------------------------------------------------------------------------------------------------------------------------------------------------------------------------------------------------------------------------------------------------------------------------------------|-----------------------------------------------------------------------------------------------------------------------------------------------------------------------------------------------------------------------------------------------|---------------------------------|------------------------------|---------------------------------|
| GF0048945 | 0                            | 0                         | 1                            | 1 Amine oxidase (flavin-containing) (1)                | primary amine oxidase activity [GO:0008131 molecular_function] (1); oxidation-reduction process [GO:005114 biological_process] (1); copper ion binding [GO:0005507 molecular_function] (1); quinone binding [GO:0048038 molecular_function] (1); amine metabolic process [GO:0009308 biological_process] (1)     | Copper amine oxidase, N2-terminal [IPR015800] (1); Copper amine oxidase [IPR00269] (1); Copper amine oxidase, N-terminal [IPR016182] (1); Copper amine oxidase, N3-terminal [IPR015802] (1)                                                   | -                               | -                            | P_trifoliata_00451_mRNA_6,1     |
| GF0048944 | 0                            | 0                         | 1                            | 1 Amine oxidase (flavin-containing) (1)                | oxidation-reduction process [GO:0048038 molecular_function] (1); copper ion binding [GO:0005507 molecular_function] (1); primary amine oxidase activity [GO:0008131 molecular_function] (1)                                                                                                                      | Copper amine oxidase [IPR000269] (1); Copper amine oxidase, C-terminal [IPR015798] (1)                                                                                                                                                        | -                               | -                            | P_trifoliata_00451_mRNA_5,1     |
| GF0048943 | 0                            | 0                         | 1                            | 1 Amine oxidase (flavin-containing) (1)                | amine metabolic process [GO:0009308 biological_process] (1); quinone binding [GO:0048038 molecular_function] (1); copper ion binding [GO:0005507 molecular_function] (1); oxidation-reduction process [GO:005114 biological_process] (1); primary amine oxidase activity [GO:0008131 molecular_function] (1)     | Copper amine oxidase, N2-terminal [IPR015800] (1); Copper amine oxidase [IPR00269] (1); Copper amine oxidase, N-terminal [IPR016182] (1); Copper amine oxidase, C-terminal [IPR015798] (1); Copper amine oxidase, N3-terminal [IPR015802] (1) | -                               | -                            | P_trifoliata_00451_mRNA_4,1     |
| GF0048942 | 0                            | 0                         | 1                            | 1 Hypothetical protein (1)                             |                                                                                                                                                                                                                                                                                                                  |                                                                                                                                                                                                                                               |                                 |                              | P_trifoliata_00451_mRNA_22,1    |
| GF0048941 | 0                            | 0                         | 1                            | 1 Calreticulin (1)                                     | endoplasmic reticulum [GO:0005783 cellular_component] (1); calcium ion binding [GO:0005509 molecular_function] (1); protein binding [GO:0005515 molecular_function] (1); unfolded protein binding [GO:0051082 molecular_function] (1); protein folding [GO:0006457 biological_process] (1)                       | Calreticulin/calnexin, P domain [IPR09033] (1); Calreticulin/calnexin [IPR001580] (1); Calreticulin [IPR009169] (1); Calreticulin/calnexin, conserved site [IPR018124] (1); Concavallin A-like lectin/glycanase domain [IPR013320] (1)        | -                               | -                            | P_trifoliata_00451_mRNA_19,1    |
| GF0048940 | 0                            | 0                         | 1                            | 1 Hypothetical protein (1)                             |                                                                                                                                                                                                                                                                                                                  |                                                                                                                                                                                                                                               |                                 |                              | P_trifoliata_00451_mRNA_18,1    |
| GF0048939 | 0                            | 0                         | 1                            | 1 Amine oxidase (flavin-containing) (1)                | amine metabolic process [GO:0009308 biological_process] (1); oxidation-reduction process [GO:005114 biological_process] (1); copper ion binding [GO:0005507 molecular_function] (1); quinone binding [GO:0048038 molecular_function] (1); primary amine oxidase activity [GO:0008131 molecular_function] (1)     | Copper amine oxidase [IPR000269] (1); Copper amine oxidase, C-terminal [IPR015798] (1)                                                                                                                                                        | -                               | -                            | P_trifoliata_00451_mRNA_1,1     |
| GF0048938 | 0                            | 0                         | 1                            | 1 Hypothetical protein (1)                             |                                                                                                                                                                                                                                                                                                                  |                                                                                                                                                                                                                                               |                                 |                              | P_trifoliata_00450_mRNA_38,1    |
| GF0048937 | 0                            | 0                         | 1                            | 1 Hypothetical protein (1)                             |                                                                                                                                                                                                                                                                                                                  |                                                                                                                                                                                                                                               |                                 |                              | P_trifoliata_00450_mRNA_35,1    |
| GF0048936 | 0                            | 0                         | 1                            | 1 Hypothetical protein (1)                             |                                                                                                                                                                                                                                                                                                                  |                                                                                                                                                                                                                                               |                                 |                              | P_trifoliata_00450_mRNA_34,1    |
| GF0048935 | 0                            | 0                         | 1                            | 1 Hypothetical protein (1)                             |                                                                                                                                                                                                                                                                                                                  |                                                                                                                                                                                                                                               |                                 |                              | P_trifoliata_00450_mRNA_33,1    |
| GF0048934 | 0                            | 0                         | 1                            | 1 Hypothetical protein (1)                             |                                                                                                                                                                                                                                                                                                                  |                                                                                                                                                                                                                                               |                                 |                              | P_trifoliata_00450_mRNA_29,1    |
| GF0048933 | 0                            | 0                         | 1                            | 1 Hypothetical protein (1)                             |                                                                                                                                                                                                                                                                                                                  |                                                                                                                                                                                                                                               |                                 |                              | P_trifoliata_00450_mRNA_27,1    |
| GF0048932 | 0                            | 0                         | 1                            | 1 Hypothetical protein (1)                             |                                                                                                                                                                                                                                                                                                                  |                                                                                                                                                                                                                                               |                                 |                              | P_trifoliata_00450_mRNA_26,1    |
| GF0048931 | 0                            | 0                         | 1                            | 1 Hypothetical protein (1)                             |                                                                                                                                                                                                                                                                                                                  |                                                                                                                                                                                                                                               |                                 |                              | P_trifoliata_00450_mRNA_21,1    |
| GF0048930 | 0                            | 0                         | 1                            | 1 Hypothetical protein (1)                             |                                                                                                                                                                                                                                                                                                                  |                                                                                                                                                                                                                                               |                                 |                              | P_trifoliata_00450_mRNA_17,1    |
| GF0048929 | 0                            | 0                         | 1                            | 1 Hypothetical protein (1)                             |                                                                                                                                                                                                                                                                                                                  |                                                                                                                                                                                                                                               |                                 |                              | P_trifoliata_00450_mRNA_15,1    |
| GF0048928 | 0                            | 0                         | 1                            | 1 Hypothetical protein (1)                             |                                                                                                                                                                                                                                                                                                                  |                                                                                                                                                                                                                                               |                                 |                              | P_trifoliata_00450_mRNA_14,1    |
| GF0048927 | 0                            | 0                         | 1                            | 1 Hypothetical protein (1)                             |                                                                                                                                                                                                                                                                                                                  |                                                                                                                                                                                                                                               |                                 |                              | P_trifoliata_00450_mRNA_13,1    |
| GF0048926 | 0                            | 0                         | 1                            | 1 Hypothetical protein (1)                             |                                                                                                                                                                                                                                                                                                                  | LOG family [IPR031100] (1)                                                                                                                                                                                                                    |                                 |                              | P_trifoliata_00450_mRNA_12,1    |
| GF0048925 | 0                            | 0                         | 1                            | 1 Hypothetical protein (1)                             | protein kinase activity [GO:0004672 molecular_function] (1); protein phosphorylation [GO:0006468 biological_process] (1); ATP binding [GO:0005524 molecular_function] (1)                                                                                                                                        | Serine/threonine dual specificity protein kinase, catalytic domain [IPR002290] (1); Serine/threonine-protein kinase, active site [IPR008271] (1); Protein kinase-like domain [IPR01009] (1); Protein kinase domain [IPR000739] (1)            |                                 |                              | P_trifoliata_00450_mRNA_10,1    |
| GF0048924 | 0                            | 0                         | 1                            | 1 Hypothetical protein (1)                             |                                                                                                                                                                                                                                                                                                                  |                                                                                                                                                                                                                                               |                                 |                              | P_trifoliata_00449_mRNA_22,1    |
| GF0048923 | 0                            | 0                         | 1                            | 1 Hypothetical protein (1)                             |                                                                                                                                                                                                                                                                                                                  |                                                                                                                                                                                                                                               |                                 |                              | P_trifoliata_00449_mRNA_18,1    |
| GF0048922 | 0                            | 0                         | 1                            | 1 Hypothetical protein (1)                             |                                                                                                                                                                                                                                                                                                                  | Uncharacterised protein family, basic secretory protein [IPR007541] (1)                                                                                                                                                                       |                                 |                              | P_trifoliata_00449_mRNA_14,1    |
| GF0048921 | 0                            | 0                         | 1                            | 1 Hypothetical protein (1)                             |                                                                                                                                                                                                                                                                                                                  | Uncharacterised protein family UFP0061 [IPR003846] (1)                                                                                                                                                                                        |                                 |                              | P_trifoliata_00448_mRNA_8,1     |
| GF0048920 | 0                            | 0                         | 1                            | 1 Hypothetical protein (1)                             |                                                                                                                                                                                                                                                                                                                  |                                                                                                                                                                                                                                               |                                 |                              | P_trifoliata_00448_mRNA_7,1     |
| GF0048919 | 0                            | 0                         | 1                            | 1 Hypothetical protein (1)                             |                                                                                                                                                                                                                                                                                                                  |                                                                                                                                                                                                                                               |                                 |                              | P_trifoliata_00448_mRNA_6,1     |
| GF0048918 | 0                            | 0                         | 1                            | 1 Hypothetical protein (1)                             |                                                                                                                                                                                                                                                                                                                  |                                                                                                                                                                                                                                               |                                 |                              | P_trifoliata_00448_mRNA_5,1     |
| GF0048917 | 0                            | 0                         | 1                            | 1 Hypothetical protein (1)                             |                                                                                                                                                                                                                                                                                                                  |                                                                                                                                                                                                                                               |                                 |                              | P_trifoliata_00448_mRNA_4,1     |
| GF0048916 | 0                            | 0                         | 1                            | 1 Hypothetical protein (1)                             |                                                                                                                                                                                                                                                                                                                  |                                                                                                                                                                                                                                               |                                 |                              | P_trifoliata_00448_mRNA_3,1     |
| GF0048915 | 0                            | 0                         | 1                            | 1 Hypothetical protein (1)                             | ADP binding [GO:0043531 molecular_function] (1)                                                                                                                                                                                                                                                                  | P-loop containing nucleoside triphosphate hydrolase [IPR027417] (1); NB-ARC [IPR002182] (1)                                                                                                                                                   |                                 |                              | P_trifoliata_00448_mRNA_25,1    |
| GF0048914 | 0                            | 0                         | 1                            | 1 Hypothetical protein (1)                             |                                                                                                                                                                                                                                                                                                                  | Leucine-rich repeat domain, L domain-like [IPR032675] (1)                                                                                                                                                                                     |                                 |                              | P_trifoliata_00448_mRNA_24,1    |
| GF0048913 | 0                            | 0                         | 1                            | 1 Hypothetical protein (1)                             |                                                                                                                                                                                                                                                                                                                  |                                                                                                                                                                                                                                               |                                 |                              | P_trifoliata_00448_mRNA_17,1    |
| GF0048912 | 0                            | 0                         | 1                            | 1 Hypothetical protein (1)                             | nucleic acid binding [GO:0003676 molecular_function] (1)                                                                                                                                                                                                                                                         | Ribonuclease H-like domain [IPR012377] (1)                                                                                                                                                                                                    |                                 |                              | P_trifoliata_00448_mRNA_1,1     |
| GF0048911 | 0                            | 0                         | 1                            | 1 Hypothetical protein (1)                             |                                                                                                                                                                                                                                                                                                                  | Leucine-rich repeat domain, L domain-like [IPR032675] (1)                                                                                                                                                                                     |                                 |                              | P_trifoliata_00447_mRNA_8,1     |
| GF0048910 | 0                            | 0                         | 1                            | 1 Hypothetical protein (1)                             |                                                                                                                                                                                                                                                                                                                  |                                                                                                                                                                                                                                               |                                 |                              | P_trifoliata_00447_mRNA_7,1     |
| GF0048909 | 0                            | 0                         | 1                            | 1 Mutator-like transposase (1)                         | zinc ion binding [GO:0008270 molecular_function] (1)                                                                                                                                                                                                                                                             | MULE transposase domain [IPR018289] (1); Zinc finger, PMZ-type [IPR006564] (1); Transposase, MuDR, plant [IPR004332] (1); Zinc finger, SWIM-type [IPR007527] (1)                                                                              |                                 |                              | P_trifoliata_00447_mRNA_6,1     |
| GF0048908 | 0                            | 0                         | 1                            | 1 Hypothetical protein (1)                             |                                                                                                                                                                                                                                                                                                                  | S-adenosyl-L-methionine-dependent methyltransferase [IPR029631] (1)                                                                                                                                                                           |                                 |                              | P_trifoliata_00447_mRNA_5,1     |
| GF0048907 | 0                            | 0                         | 1                            | 1 Hypothetical protein (1)                             |                                                                                                                                                                                                                                                                                                                  |                                                                                                                                                                                                                                               |                                 |                              | P_trifoliata_00447_mRNA_4,1     |
| GF0048906 | 0                            | 0                         | 1                            | 1 Hypothetical protein (1)                             |                                                                                                                                                                                                                                                                                                                  |                                                                                                                                                                                                                                               |                                 |                              | P_trifoliata_00447_mRNA_20,1    |
| GF0048905 | 0                            | 0                         | 1                            | 1 Hypothetical protein (1)                             |                                                                                                                                                                                                                                                                                                                  |                                                                                                                                                                                                                                               |                                 |                              | P_trifoliata_00446_mRNA_9,1     |
| GF0048904 | 0                            | 0                         | 1                            | 1 Hypothetical protein (1)                             |                                                                                                                                                                                                                                                                                                                  |                                                                                                                                                                                                                                               |                                 |                              | P_trifoliata_00446_mRNA_7,1     |
| GF0048903 | 0                            | 0                         | 1                            | 1 Hypothetical protein (1)                             |                                                                                                                                                                                                                                                                                                                  |                                                                                                                                                                                                                                               |                                 |                              | P_trifoliata_00446_mRNA_5,1     |
| GF0048902 | 0                            | 0                         | 1                            | 1 Hypothetical protein (1)                             |                                                                                                                                                                                                                                                                                                                  |                                                                                                                                                                                                                                               |                                 |                              | P_trifoliata_00446_mRNA_31,1    |
| GF0048901 | 0                            | 0                         | 1                            | 1 Hypothetical protein (1)                             |                                                                                                                                                                                                                                                                                                                  |                                                                                                                                                                                                                                               |                                 |                              | P_trifoliata_00446_mRNA_3,1     |
| GF0048900 | 0                            | 0                         | 1                            | 1 Hypothetical protein (1)                             |                                                                                                                                                                                                                                                                                                                  |                                                                                                                                                                                                                                               |                                 |                              | P_trifoliata_00446_mRNA_2,1     |
| GF0048899 | 0                            | 0                         | 1                            | 1 Hypothetical protein (1)                             |                                                                                                                                                                                                                                                                                                                  |                                                                                                                                                                                                                                               |                                 |                              | P_trifoliata_00446_mRNA_14,1    |
| GF0048898 | 0                            | 0                         | 1                            | 1 Hypothetical protein (1)                             |                                                                                                                                                                                                                                                                                                                  |                                                                                                                                                                                                                                               |                                 |                              | P_trifoliata_00446_mRNA_13,1    |
| GF0048897 | 0                            | 0                         | 1                            | 1 Hypothetical protein (1)                             |                                                                                                                                                                                                                                                                                                                  |                                                                                                                                                                                                                                               |                                 |                              | P_trifoliata_00446_mRNA_12,1    |
| GF0048896 | 0                            | 0                         | 1                            | 1 Hypothetical protein (1)                             |                                                                                                                                                                                                                                                                                                                  |                                                                                                                                                                                                                                               |                                 |                              | P_trifoliata_00446_mRNA_10,1    |
| GF0048895 | 0                            | 0                         | 1                            | 1 Hypothetical protein (1)                             |                                                                                                                                                                                                                                                                                                                  |                                                                                                                                                                                                                                               |                                 |                              | P_trifoliata_00446_mRNA_1,1     |
| GF0048894 | 0                            | 0                         | 1                            | 1 Hypothetical protein (1)                             | protein binding [GO:0005515 molecular_function] (1)                                                                                                                                                                                                                                                              | Ankyrin repeat [IPR002110] (1); Ankyrin repeat-containing domain [IPR020683] (1)                                                                                                                                                              |                                 |                              | P_trifoliata_00445_mRNA_9,1     |
| GF0048893 | 0                            | 0                         | 1                            | 1 Hypothetical protein (1)                             |                                                                                                                                                                                                                                                                                                                  |                                                                                                                                                                                                                                               |                                 |                              | P_trifoliata_00445_mRNA_7,1     |
| GF0048892 | 0                            | 0                         | 1                            | 1 Hypothetical protein (1)                             |                                                                                                                                                                                                                                                                                                                  | Reverse transcriptase, RNA-dependent DNA polymerase [IPR013103] (1)                                                                                                                                                                           |                                 |                              | P_trifoliata_00445_mRNA_5,1     |
| GF0048891 | 0                            | 0                         | 1                            | 1 Hypothetical protein (1)                             |                                                                                                                                                                                                                                                                                                                  |                                                                                                                                                                                                                                               |                                 |                              | P_trifoliata_00445_mRNA_27,1    |
| GF0048890 | 0                            | 0                         | 1                            | 1 Hypothetical protein (1)                             |                                                                                                                                                                                                                                                                                                                  |                                                                                                                                                                                                                                               |                                 |                              | P_trifoliata_00445_mRNA_26,1    |
| GF0048889 | 0                            | 0                         | 1                            | 1 Hypothetical protein (1)                             |                                                                                                                                                                                                                                                                                                                  |                                                                                                                                                                                                                                               |                                 |                              | P_trifoliata_00445_mRNA_25,1    |
| GF0048888 | 0                            | 0                         | 1                            | 1 Putative serine protease 45-like (1)                 |                                                                                                                                                                                                                                                                                                                  | Protein of unknown function DUF538 [IPR007493] (1)                                                                                                                                                                                            |                                 |                              | P_trifoliata_00445_mRNA_24,1    |
| GF0048887 | 0                            | 0                         | 1                            | 1 Hypothetical protein (1)                             |                                                                                                                                                                                                                                                                                                                  |                                                                                                                                                                                                                                               |                                 |                              | P_trifoliata_00445_mRNA_18,1    |
| GF0048886 | 0                            | 0                         | 1                            | 1 Hypothetical protein (1)                             |                                                                                                                                                                                                                                                                                                                  | Retroransposon gag domain [IPR005162] (1)                                                                                                                                                                                                     |                                 |                              | P_trifoliata_00445_mRNA_16,1    |
| GF0048885 | 0                            | 0                         | 1                            | 1 NADP-dependent alkaline double bond reductase P2 (1) | oxidation-reduction process [GO:005114 biological_process] (1); oxidoreductase activity [GO:0016991 molecular_function] (1); zinc ion binding [GO:0008270 molecular_function] (1)                                                                                                                                | NAD(P)-binding domain [IPR016040] (1); GroE-like [IPR011032] (1); Alcohol dehydrogenase superfamily, zinc-type [IPR020851] (1); Alcohol dehydrogenase, C-terminal [IPR013149] (1)                                                             |                                 |                              | P_trifoliata_00445_mRNA_14,1    |
| GF0048884 | 0                            | 0                         | 1                            | 1 Hypothetical protein (1)                             |                                                                                                                                                                                                                                                                                                                  | Endonuclease/exonuclease/phosphatase [IPR005135] (1)                                                                                                                                                                                          |                                 |                              | P_trifoliata_00445_mRNA_13,1    |
| GF0048883 | 0                            | 0                         | 1                            | 1 Hypothetical protein (1)                             |                                                                                                                                                                                                                                                                                                                  |                                                                                                                                                                                                                                               |                                 |                              | P_trifoliata_00444_mRNA_21,1    |
| GF0048882 | 0                            | 0                         | 1                            | 1 Flavonoid 3'-monooxygenase (1)                       | oxidoreductase activity, acting on paired donors, with incorporation or reduction of molecular oxygen [GO:0016705 molecular_function] (1); oxidation-reduction process [GO:005114 biological_process] (1); heme binding [GO:000037 molecular_function] (1); iron ion binding [GO:0005506 molecular_function] (1) | Cytochrome P450 [IPR01128] (1); Cytochrome P450, conserved site [IPR017972] (1); Cytochrome P450, E-class, group 1 [IPR02401] (1)                                                                                                             |                                 |                              | P_trifoliata_00444_mRNA_20,1    |

| ID        | Num. in <i>C. clementiae</i> | Num. in <i>C. canthii</i> | Num. in <i>P. trifoliata</i> | Note                                                      | GO                                                                                                                                                                                                                                                                                                                                    | InterPro                                                                                                                                                                                                                                                                                                             | Members in <i>C. clementiae</i> | Members in <i>C. canthii</i> | Members in <i>P. trifoliata</i> |
|-----------|------------------------------|---------------------------|------------------------------|-----------------------------------------------------------|---------------------------------------------------------------------------------------------------------------------------------------------------------------------------------------------------------------------------------------------------------------------------------------------------------------------------------------|----------------------------------------------------------------------------------------------------------------------------------------------------------------------------------------------------------------------------------------------------------------------------------------------------------------------|---------------------------------|------------------------------|---------------------------------|
| GF0048881 | 0                            | 0                         | 1                            | Hypothetical protein (1)                                  | iron ion binding [GO:0005506 molecular_function] (1); heme binding [GO:0020037 molecular_function] (1); oxidoreductase activity, acting on paired donors, with incorporation or reduction of molecular oxygen [GO:0016705 molecular_function] (1); oxidation-reduction process [GO:005514 biological_process] (1)                     | Cytochrome P450 [IPRO01128] (1)                                                                                                                                                                                                                                                                                      | -                               | -                            | P_trifoliata_00444_mRNA_19.1    |
| GF0048880 | 0                            | 0                         | 1                            | GAG1A1 protein (1)                                        |                                                                                                                                                                                                                                                                                                                                       |                                                                                                                                                                                                                                                                                                                      |                                 |                              | P_trifoliata_00444_mRNA_14.1    |
| GF0048879 | 0                            | 0                         | 1                            | Hypothetical protein (1)                                  | nucleic acid binding [GO:0003676 molecular_function] (1)                                                                                                                                                                                                                                                                              | Ribonuclease H-like domain [IPRO12337] (1)                                                                                                                                                                                                                                                                           | -                               | -                            | P_trifoliata_00444_mRNA_12.1    |
| GF0048878 | 0                            | 0                         | 1                            | Hypothetical protein (1)                                  | heme binding [GO:0020037 molecular_function] (1); iron ion binding [GO:0005506 molecular_function] (1); oxidoreductase activity, acting on paired donors, with incorporation or reduction of molecular oxygen [GO:0016705 molecular_function] (1); oxidation-reduction process [GO:005514 biological_process] (1)                     | Cytochrome P450 [IPRO01128] (1)                                                                                                                                                                                                                                                                                      | -                               | -                            | P_trifoliata_00444_mRNA_1.1     |
| GF0048877 | 0                            | 0                         | 1                            | Cytochrome P450 93A1 (1)                                  | heme binding [GO:0020037 molecular_function] (1); iron ion binding [GO:0005506 molecular_function] (1); oxidation-reduction process [GO:005514 biological_process] (1); oxidoreductase activity, acting on paired donors, with incorporation or reduction of molecular oxygen [GO:0016705 molecular_function] (1)                     | Cytochrome P450, E-class, group I [IPRO02401] (1); Cytochrome P450, conserved site [IPRO17972] (1); Cytochrome P450 [IPRO01128] (1)                                                                                                                                                                                  | -                               | -                            | P_trifoliata_00443_mRNA_9.1     |
| GF0048876 | 0                            | 0                         | 1                            | Hypothetical protein (1)                                  | oxidoreductase activity, acting on paired donors, with incorporation or reduction of molecular oxygen [GO:0016705 molecular_function] (1); oxidation-reduction process [GO:005514 biological_process] (1); iron ion binding [GO:0005506 molecular_function] (1); heme binding [GO:0020037 molecular_function] (1)                     | Cytochrome P450 [IPRO01128] (1); Cytochrome P450, E-class, group I [IPRO02401] (1)                                                                                                                                                                                                                                   | -                               | -                            | P_trifoliata_00443_mRNA_8.1     |
| GF0048875 | 0                            | 0                         | 1                            | Cytochrome P450 family protein (1)                        | oxidoreductase activity, acting on paired donors, with incorporation or reduction of molecular oxygen [GO:0016705 molecular_function] (1); oxidation-reduction process [GO:005514 biological_process] (1); iron ion binding [GO:0005506 molecular_function] (1); heme binding [GO:0020037 molecular_function] (1)                     | Cytochrome P450 [IPRO01128] (1); Cytochrome P450, E-class, group I [IPRO02401] (1)                                                                                                                                                                                                                                   | -                               | -                            | P_trifoliata_00443_mRNA_7.1     |
| GF0048874 | 0                            | 0                         | 1                            | Hypothetical protein (1)                                  | U2AF [GO:0089701 cellular_component] (1); metal ion binding [GO:0046872 molecular_function] (1); mRNA splicing via spliceosome [GO:0000398 biological_process] (1); RNA binding [GO:0001723 molecular_function] (1); nucleotide binding [GO:0001666 molecular_function] (1); nucleic acid binding [GO:0003676 molecular_function] (1) | RNA recognition motif domain, eukaryote [IPRO03954] (1); U2 auxiliary factor small subunit [IPRO09145] (1); RNA recognition motif domain [IPRO09061] (1); Zinc finger, CCHC-type [IPRO00571] (1); Nucleotide-binding alpha-beta plat domain [IPRO12677] (1)                                                          | -                               | -                            | P_trifoliata_00443_mRNA_4.1     |
| GF0048873 | 0                            | 0                         | 1                            | Hypothetical protein (1)                                  |                                                                                                                                                                                                                                                                                                                                       |                                                                                                                                                                                                                                                                                                                      |                                 |                              | P_trifoliata_00443_mRNA_3.1     |
| GF0048872 | 0                            | 0                         | 1                            | Hypothetical protein (1)                                  |                                                                                                                                                                                                                                                                                                                                       |                                                                                                                                                                                                                                                                                                                      |                                 |                              | P_trifoliata_00443_mRNA_26.1    |
| GF0048871 | 0                            | 0                         | 1                            | Hypothetical protein (1)                                  |                                                                                                                                                                                                                                                                                                                                       |                                                                                                                                                                                                                                                                                                                      |                                 |                              | P_trifoliata_00443_mRNA_25.1    |
| GF0048870 | 0                            | 0                         | 1                            | AAA domain protein (1)                                    |                                                                                                                                                                                                                                                                                                                                       | P-loop containing nucleoside triphosphate hydrolase [IPRO27417] (1)                                                                                                                                                                                                                                                  |                                 |                              | P_trifoliata_00443_mRNA_24.1    |
| GF0048869 | 0                            | 0                         | 1                            | Hypothetical protein (1)                                  | calmodulin binding [GO:0005516 molecular_function] (1)                                                                                                                                                                                                                                                                                | Calcium-binding P-type ATPase, N-terminal autoinhibitory domain [IPRO24750] (1)                                                                                                                                                                                                                                      |                                 |                              | P_trifoliata_00443_mRNA_2.1     |
| GF0048868 | 0                            | 0                         | 1                            | Licodione synthase (1)                                    | heme binding [GO:0020037 molecular_function] (1); iron ion binding [GO:0005506 molecular_function] (1); oxidoreductase activity, acting on paired donors, with incorporation or reduction of molecular oxygen [GO:0016705 molecular_function] (1); oxidation-reduction process [GO:005514 biological_process] (1)                     | Cytochrome P450 [IPRO01128] (1)                                                                                                                                                                                                                                                                                      | -                               | -                            | P_trifoliata_00443_mRNA_11.1    |
| GF0048867 | 0                            | 0                         | 1                            | Hypothetical protein (1)                                  | ATP binding [GO:0005524 molecular_function] (1); protein kinase activity [GO:000472 molecular_function] (1); protein phosphorylation [GO:0006468 biological_process] (1); calmodulin binding [GO:0005516 molecular_function] (1)                                                                                                      | Serine/threonine/dual specificity protein kinase, catalytic domain [IPRO02290] (1); Serine/threonine-protein kinase, active site [IPRO08271] (1); Calcium-binding P-type ATPase, N-terminal autoinhibitory domain [IPRO24750] (1); Protein kinase-like domain [IPRO11009] (1); Protein kinase domain [IPRO00719] (1) |                                 |                              | P_trifoliata_00443_mRNA_1.1     |
| GF0048866 | 0                            | 0                         | 1                            | Hypothetical protein (1)                                  |                                                                                                                                                                                                                                                                                                                                       | Reverse transcriptase zinc-binding domain [IPRO29600] (1)                                                                                                                                                                                                                                                            |                                 |                              | P_trifoliata_00442_mRNA_9.1     |
| GF0048865 | 0                            | 0                         | 1                            | Hypothetical protein (1)                                  |                                                                                                                                                                                                                                                                                                                                       |                                                                                                                                                                                                                                                                                                                      |                                 |                              | P_trifoliata_00442_mRNA_7.1     |
| GF0048864 | 0                            | 0                         | 1                            | Hypothetical protein (1)                                  |                                                                                                                                                                                                                                                                                                                                       |                                                                                                                                                                                                                                                                                                                      |                                 |                              | P_trifoliata_00442_mRNA_5.1     |
| GF0048863 | 0                            | 0                         | 1                            | Hypothetical protein (1)                                  |                                                                                                                                                                                                                                                                                                                                       |                                                                                                                                                                                                                                                                                                                      |                                 |                              | P_trifoliata_00442_mRNA_2.1     |
| GF0048862 | 0                            | 0                         | 1                            | Hypothetical protein (1)                                  |                                                                                                                                                                                                                                                                                                                                       |                                                                                                                                                                                                                                                                                                                      |                                 |                              | P_trifoliata_00442_mRNA_19.1    |
| GF0048861 | 0                            | 0                         | 1                            | Hypothetical protein (1)                                  |                                                                                                                                                                                                                                                                                                                                       | Reverse transcriptase, RNA-dependent DNA polymerase [IPRO13103] (1)                                                                                                                                                                                                                                                  |                                 |                              | P_trifoliata_00442_mRNA_18.1    |
| GF0048860 | 0                            | 0                         | 1                            | Hypothetical protein (1)                                  |                                                                                                                                                                                                                                                                                                                                       |                                                                                                                                                                                                                                                                                                                      |                                 |                              | P_trifoliata_00442_mRNA_17.1    |
| GF0048859 | 0                            | 0                         | 1                            | Hypothetical protein (1)                                  |                                                                                                                                                                                                                                                                                                                                       |                                                                                                                                                                                                                                                                                                                      |                                 |                              | P_trifoliata_00442_mRNA_15.1    |
| GF0048858 | 0                            | 0                         | 1                            | Hypothetical protein (1)                                  |                                                                                                                                                                                                                                                                                                                                       |                                                                                                                                                                                                                                                                                                                      |                                 |                              | P_trifoliata_00442_mRNA_11.1    |
| GF0048857 | 0                            | 0                         | 1                            | Hypothetical protein (1)                                  |                                                                                                                                                                                                                                                                                                                                       |                                                                                                                                                                                                                                                                                                                      |                                 |                              | P_trifoliata_00441_mRNA_2.1     |
| GF0048856 | 0                            | 0                         | 1                            | Hypothetical protein (1)                                  | proteolysis [GO:0006508 biological_process] (1); serine-type endopeptidase activity [GO:0004252 molecular_function] (1)                                                                                                                                                                                                               | Peptidase S8/S53 domain [IPRO00209] (1); Peptidase S8, subtilisin-related [IPRO15500] (1)                                                                                                                                                                                                                            |                                 |                              | P_trifoliata_00441_mRNA_18.1    |
| GF0048855 | 0                            | 0                         | 1                            | Hypothetical protein (1)                                  |                                                                                                                                                                                                                                                                                                                                       |                                                                                                                                                                                                                                                                                                                      |                                 |                              | P_trifoliata_00441_mRNA_17.1    |
| GF0048854 | 0                            | 0                         | 1                            | Hypothetical protein (1)                                  |                                                                                                                                                                                                                                                                                                                                       |                                                                                                                                                                                                                                                                                                                      |                                 |                              | P_trifoliata_00441_mRNA_1.1     |
| GF0048853 | 0                            | 0                         | 1                            | Hypothetical protein (1)                                  |                                                                                                                                                                                                                                                                                                                                       |                                                                                                                                                                                                                                                                                                                      |                                 |                              | P_trifoliata_00440_mRNA_8.1     |
| GF0048852 | 0                            | 0                         | 1                            | Hypothetical protein (1)                                  |                                                                                                                                                                                                                                                                                                                                       |                                                                                                                                                                                                                                                                                                                      |                                 |                              | P_trifoliata_00440_mRNA_6.1     |
| GF0048851 | 0                            | 0                         | 1                            | Hypothetical protein (1)                                  |                                                                                                                                                                                                                                                                                                                                       |                                                                                                                                                                                                                                                                                                                      |                                 |                              | P_trifoliata_00440_mRNA_4.1     |
| GF0048850 | 0                            | 0                         | 1                            | Hypothetical protein (1)                                  |                                                                                                                                                                                                                                                                                                                                       |                                                                                                                                                                                                                                                                                                                      |                                 |                              | P_trifoliata_00440_mRNA_31.1    |
| GF0048849 | 0                            | 0                         | 1                            | Ubiquitin-protein ligase, PUB12 (1)                       | binding [GO:0005488 molecular_function] (1); protein ubiquitination [GO:0016567 biological_process] (1); ubiquitin-protein transferase activity [GO:0004842 molecular_function] (1)                                                                                                                                                   | Armadillo-like helix [IPRO11989] (1); Zinc finger, RING FYVE/PHD-type [IPRO13083] (1); U-box domain [IPRO01613] (1); Armadillo-type fold [IPRO16024] (1)                                                                                                                                                             |                                 |                              | P_trifoliata_00440_mRNA_30.1    |
| GF0048848 | 0                            | 0                         | 1                            | Ankyrin repeat family protein, putative (1)               | protein binding [GO:0005515 molecular_function] (1)                                                                                                                                                                                                                                                                                   | Ankyrin repeat-containing domain [IPRO20683] (1); Ankyrin repeat [IPRO02110] (1)                                                                                                                                                                                                                                     |                                 |                              | P_trifoliata_00440_mRNA_2.1     |
| GF0048847 | 0                            | 0                         | 1                            | Hypothetical protein (1)                                  |                                                                                                                                                                                                                                                                                                                                       |                                                                                                                                                                                                                                                                                                                      |                                 |                              | P_trifoliata_00440_mRNA_12.1    |
| GF0048846 | 0                            | 0                         | 1                            | Hypothetical protein (1)                                  | protein binding [GO:0005515 molecular_function] (1)                                                                                                                                                                                                                                                                                   | Ankyrin repeat-containing domain [IPRO20683] (1); Ankyrin repeat [IPRO02110] (1); Ankyrin repeat [IPRO02110] (1); PLAG domain [IPRO29961] (1); Ankyrin repeat-containing domain [IPRO20683] (1)                                                                                                                      |                                 |                              | P_trifoliata_00440_mRNA_1.1     |
| GF0048845 | 0                            | 0                         | 1                            | Ankyrin repeat family protein, putative (1)               | protein binding [GO:0005515 molecular_function] (1)                                                                                                                                                                                                                                                                                   | Integrase, catalytic core [IPRO01584] (1); Ribonuclease H-like domain [IPRO12337] (1); Viral movement protein [IPRO28919] (1)                                                                                                                                                                                        |                                 |                              | P_trifoliata_00439_mRNA_9.1     |
| GF0048844 | 0                            | 0                         | 1                            | Hypothetical protein (1)                                  | DNA integration [GO:0015074 biological_process] (1); nucleic acid binding [GO:0003676 molecular_function] (1)                                                                                                                                                                                                                         |                                                                                                                                                                                                                                                                                                                      |                                 |                              | P_trifoliata_00439_mRNA_5.1     |
| GF0048842 | 0                            | 0                         | 1                            | Hypothetical protein (1)                                  | aspartic-type endopeptidase activity [GO:0004190 molecular_function] (1); proteolysis [GO:0006508 biological_process] (1)                                                                                                                                                                                                             | Aspartic peptidase, active site [IPRO01969] (1); Peptidase A2A, retrovirus, catalytic [IPRO01995] (1)                                                                                                                                                                                                                |                                 |                              | P_trifoliata_00439_mRNA_36.1    |
| GF0048841 | 0                            | 0                         | 1                            | Hypothetical protein (1)                                  |                                                                                                                                                                                                                                                                                                                                       |                                                                                                                                                                                                                                                                                                                      |                                 |                              | P_trifoliata_00439_mRNA_35.1    |
| GF0048840 | 0                            | 0                         | 1                            | Hypothetical protein (1)                                  |                                                                                                                                                                                                                                                                                                                                       |                                                                                                                                                                                                                                                                                                                      |                                 |                              | P_trifoliata_00439_mRNA_32.1    |
| GF0048839 | 0                            | 0                         | 1                            | Hypothetical protein (1)                                  |                                                                                                                                                                                                                                                                                                                                       |                                                                                                                                                                                                                                                                                                                      |                                 |                              | P_trifoliata_00439_mRNA_30.1    |
| GF0048838 | 0                            | 0                         | 1                            | Hypothetical protein (1)                                  |                                                                                                                                                                                                                                                                                                                                       |                                                                                                                                                                                                                                                                                                                      |                                 |                              | P_trifoliata_00439_mRNA_29.1    |
| GF0048837 | 0                            | 0                         | 1                            | Hypothetical protein (1)                                  |                                                                                                                                                                                                                                                                                                                                       |                                                                                                                                                                                                                                                                                                                      |                                 |                              | P_trifoliata_00439_mRNA_27.1    |
| GF0048836 | 0                            | 0                         | 1                            | Hypothetical protein (1)                                  | nucleic acid binding [GO:0003676 molecular_function] (1); DNA integration [GO:0015074 biological_process] (1)                                                                                                                                                                                                                         | Integrase, catalytic core [IPRO01584] (1); Ribonuclease H-like domain [IPRO12337] (1)                                                                                                                                                                                                                                |                                 |                              | P_trifoliata_00439_mRNA_26.1    |
| GF0048835 | 0                            | 0                         | 1                            | Hypothetical protein (1)                                  |                                                                                                                                                                                                                                                                                                                                       |                                                                                                                                                                                                                                                                                                                      |                                 |                              | P_trifoliata_00439_mRNA_25.1    |
| GF0048834 | 0                            | 0                         | 1                            | Hypothetical protein (1)                                  |                                                                                                                                                                                                                                                                                                                                       |                                                                                                                                                                                                                                                                                                                      |                                 |                              | P_trifoliata_00439_mRNA_24.1    |
| GF0048833 | 0                            | 0                         | 1                            | Hypothetical protein (1)                                  |                                                                                                                                                                                                                                                                                                                                       |                                                                                                                                                                                                                                                                                                                      |                                 |                              | P_trifoliata_00439_mRNA_23.1    |
| GF0048832 | 0                            | 0                         | 1                            | Hypothetical protein (1)                                  |                                                                                                                                                                                                                                                                                                                                       |                                                                                                                                                                                                                                                                                                                      |                                 |                              | P_trifoliata_00439_mRNA_15.1    |
| GF0048831 | 0                            | 0                         | 1                            | Hypothetical protein (1)                                  |                                                                                                                                                                                                                                                                                                                                       |                                                                                                                                                                                                                                                                                                                      |                                 |                              | P_trifoliata_00439_mRNA_14.1    |
| GF0048830 | 0                            | 0                         | 1                            | Hypothetical protein (1)                                  | nucleic acid binding [GO:0003676 molecular_function] (1); nucleotide binding [GO:0001666 molecular_function] (1)                                                                                                                                                                                                                      | Nucleotide-binding alpha-beta plat domain [IPRO12677] (1); RNA recognition motif domain [IPRO00504] (1)                                                                                                                                                                                                              |                                 |                              | P_trifoliata_00438_mRNA_9.1     |
| GF0048829 | 0                            | 0                         | 1                            | Hypothetical protein (1)                                  |                                                                                                                                                                                                                                                                                                                                       |                                                                                                                                                                                                                                                                                                                      |                                 |                              | P_trifoliata_00438_mRNA_6.1     |
| GF0048828 | 0                            | 0                         | 1                            | Leucine-rich repeat (LRR) family protein (1)              |                                                                                                                                                                                                                                                                                                                                       |                                                                                                                                                                                                                                                                                                                      |                                 |                              | P_trifoliata_00438_mRNA_5.1     |
| GF0048827 | 0                            | 0                         | 1                            | Hypothetical protein (1)                                  |                                                                                                                                                                                                                                                                                                                                       |                                                                                                                                                                                                                                                                                                                      |                                 |                              | P_trifoliata_00438_mRNA_24.1    |
| GF0048826 | 0                            | 0                         | 1                            | Acyl-CoA N-acyltransferases (NAT) superfamily protein (1) | N-acetyltransferase activity [GO:0008080 molecular_function] (1)                                                                                                                                                                                                                                                                      | Acyl-CoA N-acyltransferase [IPRO16181] (1); GNAT domain [IPRO01882] (1)                                                                                                                                                                                                                                              |                                 |                              | P_trifoliata_00438_mRNA_21.1    |



| ID        | Num. in <i>C. celeratae</i> | Num. in <i>C. canthii</i> | Num. in <i>P. trifoliata</i> | Note                                                     | GO                                                                                                                                                                                                                                                                                                                         | InterPro                                                                                                                                                                                                                                                                                                                                                                                                                                                                                                                                                                                                                 | Members in <i>C. celeratae</i> | Members in <i>C. canthii</i> | Members in <i>P. trifoliata</i> |
|-----------|-----------------------------|---------------------------|------------------------------|----------------------------------------------------------|----------------------------------------------------------------------------------------------------------------------------------------------------------------------------------------------------------------------------------------------------------------------------------------------------------------------------|--------------------------------------------------------------------------------------------------------------------------------------------------------------------------------------------------------------------------------------------------------------------------------------------------------------------------------------------------------------------------------------------------------------------------------------------------------------------------------------------------------------------------------------------------------------------------------------------------------------------------|--------------------------------|------------------------------|---------------------------------|
| GF0048825 | 0                           | 0                         | 1                            | Transcriptionally-controlled tumour protein homolog (1)  |                                                                                                                                                                                                                                                                                                                            | Mos4-like [IPR011057] (1);<br>Transcriptionally controlled tumour protein, conserved site [IPR018103] (1);<br>Transcriptionally controlled tumour protein [IPR018105] (1); Mos4-transcriptionally controlled tumour-associated TCTP [IPR011323] (1)                                                                                                                                                                                                                                                                                                                                                                      | -                              | -                            | P_trifoliata_00438_mRNA_2,1     |
| GF0048824 | 0                           | 0                         | 1                            | Hypothetical protein (1)                                 |                                                                                                                                                                                                                                                                                                                            |                                                                                                                                                                                                                                                                                                                                                                                                                                                                                                                                                                                                                          | -                              | -                            | P_trifoliata_00438_mRNA_18,1    |
| GF0048823 | 0                           | 0                         | 1                            | Hypothetical protein (1)                                 |                                                                                                                                                                                                                                                                                                                            |                                                                                                                                                                                                                                                                                                                                                                                                                                                                                                                                                                                                                          | -                              | -                            | P_trifoliata_00438_mRNA_17,1    |
| GF0048822 | 0                           | 0                         | 1                            | Beta-hexosaminidase subunit B2 (1)                       | beta-N-acetylhexosaminidase activity [GO:0004563 molecular_function] (1);<br>hydrolase activity, hydrolyzing O-glycosyl compounds [GO:0004553 molecular_function] (1);<br>carbohydrate metabolic process [GO:0005975 biological_process] (1)                                                                               | Glycoside hydrolase, catalytic domain [IPR013781] (1);<br>Chitinase/beta-hexosaminidase domain 2-like [IPR029018] (1);<br>Glycoside hydrolase superfamily [IPR017853] (1);<br>Beta-hexosaminidase [IPR025705] (1);<br>Glycoside hydrolase family 20, catalytic domain [IPR015883] (1);<br>Beta-hexosaminidase, eukaryotic type, N-terminal [IPR029019] (1)                                                                                                                                                                                                                                                               | -                              | -                            | P_trifoliata_00438_mRNA_12,1    |
| GF0048821 | 0                           | 0                         | 1                            | Hypothetical protein (1)                                 |                                                                                                                                                                                                                                                                                                                            |                                                                                                                                                                                                                                                                                                                                                                                                                                                                                                                                                                                                                          | -                              | -                            | P_trifoliata_00438_mRNA_11,1    |
| GF0048820 | 0                           | 0                         | 1                            | Hypothetical protein (1)                                 |                                                                                                                                                                                                                                                                                                                            | Mos4-like [IPR011057] (1);<br>Transcriptionally controlled tumour protein, conserved site [IPR018103] (1);<br>Mos4/transcriptionally controlled tumour-associated TCTP [IPR011323] (1);<br>Transcriptionally controlled tumour protein [IPR018105] (1)                                                                                                                                                                                                                                                                                                                                                                   | -                              | -                            | P_trifoliata_00438_mRNA_1,1     |
| GF0048819 | 0                           | 0                         | 1                            | Hypothetical protein (1)                                 |                                                                                                                                                                                                                                                                                                                            |                                                                                                                                                                                                                                                                                                                                                                                                                                                                                                                                                                                                                          | -                              | -                            | P_trifoliata_00437_mRNA_9,1     |
| GF0048818 | 0                           | 0                         | 1                            | Putative AC9 transposase (1)                             | nucleic acid binding [GO:0003676 molecular_function] (1);<br>protein dimerization activity [GO:0046983 molecular_function] (1)                                                                                                                                                                                             | HAT, C-terminal dimerisation domain [IPR008906] (1);<br>Ribonuclease H-like domain [IPR012337] (1)                                                                                                                                                                                                                                                                                                                                                                                                                                                                                                                       | -                              | -                            | P_trifoliata_00437_mRNA_8,1     |
| GF0048817 | 0                           | 0                         | 1                            | Hypothetical protein (1)                                 |                                                                                                                                                                                                                                                                                                                            |                                                                                                                                                                                                                                                                                                                                                                                                                                                                                                                                                                                                                          | -                              | -                            | P_trifoliata_00437_mRNA_6,1     |
| GF0048816 | 0                           | 0                         | 1                            | Hypothetical protein (1)                                 | nucleotide binding [GO:0000166 molecular_function] (1)                                                                                                                                                                                                                                                                     | P-type ATPase, cytoplasmic domain N [IPR025299] (1);<br>HAD-like domain [IPR023214] (1)                                                                                                                                                                                                                                                                                                                                                                                                                                                                                                                                  | -                              | -                            | P_trifoliata_00437_mRNA_3,1     |
| GF0048815 | 0                           | 0                         | 1                            | Caffeic acid O-methyltransferase (1)                     | O-methyltransferase activity [GO:0008171 molecular_function] (1);<br>methyltransferase activity [GO:0008168 molecular_function] (1)                                                                                                                                                                                        | O-methyltransferase, family 2 [IPR01077] (1);<br>O-methyltransferase COMT-type [IPR016461] (1);<br>5-adenosyl-L-methionine-dependent methyltransferase [IPR029063] (1)                                                                                                                                                                                                                                                                                                                                                                                                                                                   | -                              | -                            | P_trifoliata_00437_mRNA_24,1    |
| GF0048814 | 0                           | 0                         | 1                            | Hypothetical protein (1)                                 |                                                                                                                                                                                                                                                                                                                            |                                                                                                                                                                                                                                                                                                                                                                                                                                                                                                                                                                                                                          | -                              | -                            | P_trifoliata_00437_mRNA_20,1    |
| GF0048813 | 0                           | 0                         | 1                            | Hypothetical protein (1)                                 |                                                                                                                                                                                                                                                                                                                            | P-type ATPase, transmembrane domain [IPR023298] (1);<br>Calcium-transporting P-type ATPase, C-terminal [IPR006068] (1)                                                                                                                                                                                                                                                                                                                                                                                                                                                                                                   | -                              | -                            | P_trifoliata_00437_mRNA_2,1     |
| GF0048812 | 0                           | 0                         | 1                            | Hypothetical protein (1)                                 |                                                                                                                                                                                                                                                                                                                            |                                                                                                                                                                                                                                                                                                                                                                                                                                                                                                                                                                                                                          | -                              | -                            | P_trifoliata_00437_mRNA_18,1    |
| GF0048811 | 0                           | 0                         | 1                            | Hypothetical protein (1)                                 |                                                                                                                                                                                                                                                                                                                            |                                                                                                                                                                                                                                                                                                                                                                                                                                                                                                                                                                                                                          | -                              | -                            | P_trifoliata_00437_mRNA_16,1    |
| GF0048810 | 0                           | 0                         | 1                            | Hypothetical protein (1)                                 |                                                                                                                                                                                                                                                                                                                            |                                                                                                                                                                                                                                                                                                                                                                                                                                                                                                                                                                                                                          | -                              | -                            | P_trifoliata_00437_mRNA_15,1    |
| GF0048809 | 0                           | 0                         | 1                            | Hypothetical protein (1)                                 |                                                                                                                                                                                                                                                                                                                            |                                                                                                                                                                                                                                                                                                                                                                                                                                                                                                                                                                                                                          | -                              | -                            | P_trifoliata_00437_mRNA_14,1    |
| GF0048808 | 0                           | 0                         | 1                            | DEAD-box ATP-dependent RNA helicase 20 (1)               | nucleic acid binding [GO:0003676 molecular_function] (1);<br>ATP binding [GO:0005524 molecular_function] (1)                                                                                                                                                                                                               | Helicase, C-terminal [IPR001650] (1);<br>ATP-dependent RNA helicase DEAD-box, conserved site [IPR000629] (1);<br>P-loop containing nucleoside triphosphate hydrolase [IPR027417] (1);<br>DEAD/DEAH box helicase domain [IPR011545] (1);<br>RNA helicase, DEAD-box type, Q motif [IPR014014] (1);<br>Helicase superfamily 1/2, ATP-binding domain [IPR014001] (1)                                                                                                                                                                                                                                                         | -                              | -                            | P_trifoliata_00437_mRNA_1,1     |
| GF0048807 | 0                           | 0                         | 1                            | Hypothetical protein (1)                                 |                                                                                                                                                                                                                                                                                                                            |                                                                                                                                                                                                                                                                                                                                                                                                                                                                                                                                                                                                                          | -                              | -                            | P_trifoliata_00436_mRNA_36,1    |
| GF0048806 | 0                           | 0                         | 1                            | Hypothetical protein (1)                                 |                                                                                                                                                                                                                                                                                                                            |                                                                                                                                                                                                                                                                                                                                                                                                                                                                                                                                                                                                                          | -                              | -                            | P_trifoliata_00436_mRNA_33,1    |
| GF0048805 | 0                           | 0                         | 1                            | UPF0481 protein (1)                                      |                                                                                                                                                                                                                                                                                                                            | Protein of unknown function DUF247, plant [IPR004158] (1)                                                                                                                                                                                                                                                                                                                                                                                                                                                                                                                                                                | -                              | -                            | P_trifoliata_00436_mRNA_30,1    |
| GF0048804 | 0                           | 0                         | 1                            | Hypothetical protein (1)                                 | transcription factor TFIIID complex [GO:0005669 cellular_component] (1);<br>transcription initiation from RNA polymerase II promoter [GO:0006367 biological_process] (1)                                                                                                                                                   | TAF155 protein, conserved region [IPR006751] (1)                                                                                                                                                                                                                                                                                                                                                                                                                                                                                                                                                                         | -                              | -                            | P_trifoliata_00436_mRNA_3,1     |
| GF0048803 | 0                           | 0                         | 1                            | Hypothetical protein (1)                                 |                                                                                                                                                                                                                                                                                                                            | Protein of unknown function DUF247, plant [IPR004158] (1)                                                                                                                                                                                                                                                                                                                                                                                                                                                                                                                                                                | -                              | -                            | P_trifoliata_00436_mRNA_29,1    |
| GF0048802 | 0                           | 0                         | 1                            | HAT dimerisation domain-containing protein, putative (1) |                                                                                                                                                                                                                                                                                                                            |                                                                                                                                                                                                                                                                                                                                                                                                                                                                                                                                                                                                                          | -                              | -                            | P_trifoliata_00436_mRNA_25,1    |
| GF0048801 | 0                           | 0                         | 1                            | Hypothetical protein (1)                                 |                                                                                                                                                                                                                                                                                                                            |                                                                                                                                                                                                                                                                                                                                                                                                                                                                                                                                                                                                                          | -                              | -                            | P_trifoliata_00436_mRNA_22,1    |
| GF0048800 | 0                           | 0                         | 1                            | Hypothetical protein (1)                                 |                                                                                                                                                                                                                                                                                                                            |                                                                                                                                                                                                                                                                                                                                                                                                                                                                                                                                                                                                                          | -                              | -                            | P_trifoliata_00436_mRNA_21,1    |
| GF0048799 | 0                           | 0                         | 1                            | DUF247 domain protein (1)                                |                                                                                                                                                                                                                                                                                                                            | Protein of unknown function DUF247, plant [IPR004158] (1)                                                                                                                                                                                                                                                                                                                                                                                                                                                                                                                                                                | -                              | -                            | P_trifoliata_00436_mRNA_18,1    |
| GF0048798 | 0                           | 0                         | 1                            | UPF0481 protein (1)                                      |                                                                                                                                                                                                                                                                                                                            | Protein of unknown function DUF247, plant [IPR004158] (1)                                                                                                                                                                                                                                                                                                                                                                                                                                                                                                                                                                | -                              | -                            | P_trifoliata_00436_mRNA_17,1    |
| GF0048797 | 0                           | 0                         | 1                            | Hypothetical protein (1)                                 |                                                                                                                                                                                                                                                                                                                            | Protein of unknown function DUF247, plant [IPR004158] (1)                                                                                                                                                                                                                                                                                                                                                                                                                                                                                                                                                                | -                              | -                            | P_trifoliata_00436_mRNA_12,1    |
| GF0048796 | 0                           | 0                         | 1                            | DUF247 domain protein (1)                                |                                                                                                                                                                                                                                                                                                                            | Protein of unknown function DUF247, plant [IPR004158] (1)                                                                                                                                                                                                                                                                                                                                                                                                                                                                                                                                                                | -                              | -                            | P_trifoliata_00436_mRNA_11,1    |
| GF0048795 | 0                           | 0                         | 1                            | Hypothetical protein (1)                                 | oxidoreductase activity, acting on paired donors, with incorporation or reduction of molecular oxygen [GO:0016705 molecular_function] (1);<br>oxidation-reduction process [GO:0055114 biological_process] (1);<br>heme binding [GO:000037 molecular_function] (1);<br>iron ion binding [GO:0005506 molecular_function] (1) | Cytochrome P450, E-class, group I [IPR002401] (1);<br>Cytochrome P450 [IPR001128] (1)                                                                                                                                                                                                                                                                                                                                                                                                                                                                                                                                    | -                              | -                            | P_trifoliata_00435_mRNA_6,1     |
| GF0048794 | 0                           | 0                         | 1                            | Hypothetical protein (1)                                 |                                                                                                                                                                                                                                                                                                                            |                                                                                                                                                                                                                                                                                                                                                                                                                                                                                                                                                                                                                          | -                              | -                            | P_trifoliata_00435_mRNA_4,1     |
| GF0048793 | 0                           | 0                         | 1                            | Miraculin (1)                                            | endopeptidase inhibitor activity [GO:0004866 molecular_function] (1)                                                                                                                                                                                                                                                       | Kunitz inhibitor ST1-like [IPR011065] (1);<br>Proteinase inhibitor I3, Kunitz legume [IPR002160] (1)                                                                                                                                                                                                                                                                                                                                                                                                                                                                                                                     | -                              | -                            | P_trifoliata_00435_mRNA_3,1     |
| GF0048792 | 0                           | 0                         | 1                            | Hypothetical protein (1)                                 |                                                                                                                                                                                                                                                                                                                            | Domain of unknown function DUF676, lipase-like [IPR007511] (1);<br>Alpha/Beta hydrolase fold [IPR029058] (1)                                                                                                                                                                                                                                                                                                                                                                                                                                                                                                             | -                              | -                            | P_trifoliata_00435_mRNA_16,1    |
| GF0048791 | 0                           | 0                         | 1                            | Hypothetical protein (1)                                 | glycolytic process [GO:0006096 biological_process] (1);<br>6-phosphofructokinase activity [GO:0003872 molecular_function] (1);<br>protein binding [GO:0005515 molecular_function] (1)                                                                                                                                      | Phosphofructokinase domain [IPR000203] (1);<br>Askryn repeat-containing domain [IPR026831] (1);<br>Domain of unknown function DUF676, lipase-like [IPR007511] (1);<br>Askryn repeat [IPR002110] (1);<br>Alpha/Beta hydrolase fold [IPR029058] (1)                                                                                                                                                                                                                                                                                                                                                                        | -                              | -                            | P_trifoliata_00435_mRNA_15,1    |
| GF0048790 | 0                           | 0                         | 1                            | CDNA clone:J02302E20, full insert sequence (1)           |                                                                                                                                                                                                                                                                                                                            |                                                                                                                                                                                                                                                                                                                                                                                                                                                                                                                                                                                                                          | -                              | -                            | P_trifoliata_00435_mRNA_14,1    |
| GF0048789 | 0                           | 0                         | 1                            | Hypothetical protein (1)                                 | heme binding [GO:000037 molecular_function] (1);<br>iron ion binding [GO:0005506 molecular_function] (1);<br>oxidation-reduction process [GO:0055114 biological_process] (1);<br>oxidoreductase activity, acting on paired donors, with incorporation or reduction of molecular oxygen [GO:0016705 molecular_function] (1) | Cytochrome P450 [IPR001128] (1)                                                                                                                                                                                                                                                                                                                                                                                                                                                                                                                                                                                          | -                              | -                            | P_trifoliata_00435_mRNA_12,1    |
| GF0048788 | 0                           | 0                         | 1                            | Hypothetical protein (1)                                 |                                                                                                                                                                                                                                                                                                                            |                                                                                                                                                                                                                                                                                                                                                                                                                                                                                                                                                                                                                          | -                              | -                            | P_trifoliata_00435_mRNA_11,1    |
| GF0048787 | 0                           | 0                         | 1                            | Exocyst component seck, putative (1)                     |                                                                                                                                                                                                                                                                                                                            |                                                                                                                                                                                                                                                                                                                                                                                                                                                                                                                                                                                                                          | -                              | -                            | P_trifoliata_00434_mRNA_8,1     |
| GF0048786 | 0                           | 0                         | 1                            | Hypothetical protein (1)                                 |                                                                                                                                                                                                                                                                                                                            |                                                                                                                                                                                                                                                                                                                                                                                                                                                                                                                                                                                                                          | -                              | -                            | P_trifoliata_00434_mRNA_6,1     |
| GF0048785 | 0                           | 0                         | 1                            | Hypothetical protein (1)                                 |                                                                                                                                                                                                                                                                                                                            |                                                                                                                                                                                                                                                                                                                                                                                                                                                                                                                                                                                                                          | -                              | -                            | P_trifoliata_00434_mRNA_31,1    |
| GF0048784 | 0                           | 0                         | 1                            | Hypothetical protein (1)                                 |                                                                                                                                                                                                                                                                                                                            |                                                                                                                                                                                                                                                                                                                                                                                                                                                                                                                                                                                                                          | -                              | -                            | P_trifoliata_00434_mRNA_26,1    |
| GF0048783 | 0                           | 0                         | 1                            | Hypothetical protein (1)                                 |                                                                                                                                                                                                                                                                                                                            |                                                                                                                                                                                                                                                                                                                                                                                                                                                                                                                                                                                                                          | -                              | -                            | P_trifoliata_00434_mRNA_25,1    |
| GF0048782 | 0                           | 0                         | 1                            | Hypothetical protein (1)                                 | protein binding [GO:0005515 molecular_function] (1);<br>signal transduction [GO:0007165 biological_process] (1)                                                                                                                                                                                                            | P-loop containing nucleoside triphosphate hydrolase [IPR027417] (1);<br>Toll interleukin-1 receptor homology (THR) domain [IPR000157] (1)                                                                                                                                                                                                                                                                                                                                                                                                                                                                                | -                              | -                            | P_trifoliata_00434_mRNA_22,1    |
| GF0048781 | 0                           | 0                         | 1                            | Hypothetical protein (1)                                 |                                                                                                                                                                                                                                                                                                                            |                                                                                                                                                                                                                                                                                                                                                                                                                                                                                                                                                                                                                          | -                              | -                            | P_trifoliata_00434_mRNA_21,1    |
| GF0048780 | 0                           | 0                         | 1                            | TMV resistance protein N-like protein 5 (1)              | ADP binding [GO:0043531 molecular_function] (1)                                                                                                                                                                                                                                                                            | Winged helix-turn-helix DNA-binding domain [IPR011991] (1);<br>P-loop containing nucleoside triphosphate hydrolase [IPR027417] (1);<br>NB-ARC [IPR002182] (1)                                                                                                                                                                                                                                                                                                                                                                                                                                                            | -                              | -                            | P_trifoliata_00434_mRNA_19,1    |
| GF0048779 | 0                           | 0                         | 1                            | LRR receptor-like kinase family protein (1)              | protein binding [GO:0005515 molecular_function] (1);<br>protein phosphorylation [GO:0006468 biological_process] (1);<br>protein kinase activity [GO:0004672 molecular_function] (1);<br>ATP binding [GO:0005524 molecular_function] (1)                                                                                    | Protein kinase domain [IPR0000719] (1);<br>Concanavalin A-like lectin/glucanase domain [IPR013320] (1);<br>Leucine-rich repeat domain, L domain-like [IPR032675] (1);<br>Protein kinase-like domain [IPR011099] (1);<br>Leucine-rich repeat, typical subtype [IPR003591] (1);<br>Serine/threonine/dual specificity protein kinase, catalytic domain [IPR002290] (1);<br>Leucine-rich repeat-containing N-terminal, plant-type [IPR013210] (1);<br>Protein kinase, ATP binding site [IPR017441] (1);<br>Leucine-rich repeat [IPR016111] (1);<br>Serine/threonine/tyrosine-protein kinase catalytic domain [IPR001245] (1) | -                              | -                            | P_trifoliata_00434_mRNA_16,1    |
| GF0048778 | 0                           | 0                         | 1                            | Hypothetical protein (1)                                 |                                                                                                                                                                                                                                                                                                                            |                                                                                                                                                                                                                                                                                                                                                                                                                                                                                                                                                                                                                          | -                              | -                            | P_trifoliata_00433_mRNA_8,1     |
| GF0048777 | 0                           | 0                         | 1                            | Hypothetical protein (1)                                 |                                                                                                                                                                                                                                                                                                                            |                                                                                                                                                                                                                                                                                                                                                                                                                                                                                                                                                                                                                          | -                              | -                            | P_trifoliata_00433_mRNA_7,1     |

| ID        | Num. in <i>C. clementiae</i> | Num. in <i>C. umbilo</i> | Num. in <i>P. trifoliata</i> | Note                                                         | GO                                                                                                                                                                                                                                                                                                                                                                                        | InterPro                                                                                                                                                                   | Members in <i>C. clementiae</i> | Members in <i>C. umbilo</i> | Members in <i>P. trifoliata</i> |
|-----------|------------------------------|--------------------------|------------------------------|--------------------------------------------------------------|-------------------------------------------------------------------------------------------------------------------------------------------------------------------------------------------------------------------------------------------------------------------------------------------------------------------------------------------------------------------------------------------|----------------------------------------------------------------------------------------------------------------------------------------------------------------------------|---------------------------------|-----------------------------|---------------------------------|
| GF0048776 | 0                            | 0                        | 1                            | Hypothetical protein (1)                                     | nucleic acid binding [GO:0003676 molecular_function] (1); zinc ion binding [GO:0008270 molecular_function] (1)                                                                                                                                                                                                                                                                            | Zinc finger, CCHC-type [IPR001878] (1)                                                                                                                                     | -                               | -                           | P_trifoliata_00433_mRNA_2,1     |
| GF0048775 | 0                            | 0                        | 1                            | Hypothetical protein (1)                                     |                                                                                                                                                                                                                                                                                                                                                                                           | Transposon, En/Spm-like [IPR004242] (1)                                                                                                                                    | -                               | -                           | P_trifoliata_00433_mRNA_15,1    |
| GF0048774 | 0                            | 0                        | 1                            | Hypothetical protein (1)                                     | zinc ion binding [GO:0008270 molecular_function] (1); nucleic acid binding [GO:0003676 molecular_function] (1)                                                                                                                                                                                                                                                                            | Zinc finger, CCHC-type [IPR001878] (1)                                                                                                                                     | -                               | -                           | P_trifoliata_00433_mRNA_13,1    |
| GF0048773 | 0                            | 0                        | 1                            | Hypothetical protein (1)                                     |                                                                                                                                                                                                                                                                                                                                                                                           |                                                                                                                                                                            | -                               | -                           | P_trifoliata_00432_mRNA_7,1     |
| GF0048772 | 0                            | 0                        | 1                            | Hypothetical protein (1)                                     |                                                                                                                                                                                                                                                                                                                                                                                           |                                                                                                                                                                            | -                               | -                           | P_trifoliata_00432_mRNA_5,1     |
| GF0048771 | 0                            | 0                        | 1                            | Hypothetical protein (1)                                     |                                                                                                                                                                                                                                                                                                                                                                                           |                                                                                                                                                                            | -                               | -                           | P_trifoliata_00432_mRNA_4,1     |
| GF0048770 | 0                            | 0                        | 1                            | Hypothetical protein (1)                                     |                                                                                                                                                                                                                                                                                                                                                                                           | Plant disease resistance response protein [IPR004265] (1)                                                                                                                  | -                               | -                           | P_trifoliata_00432_mRNA_29,1    |
| GF0048769 | 0                            | 0                        | 1                            | Hypothetical protein (1)                                     |                                                                                                                                                                                                                                                                                                                                                                                           |                                                                                                                                                                            | -                               | -                           | P_trifoliata_00432_mRNA_24,1    |
| GF0048768 | 0                            | 0                        | 1                            | Hypothetical protein (1)                                     |                                                                                                                                                                                                                                                                                                                                                                                           |                                                                                                                                                                            | -                               | -                           | P_trifoliata_00432_mRNA_22,1    |
| GF0048767 | 0                            | 0                        | 1                            | Hypothetical protein (1)                                     |                                                                                                                                                                                                                                                                                                                                                                                           |                                                                                                                                                                            | -                               | -                           | P_trifoliata_00432_mRNA_21,1    |
| GF0048766 | 0                            | 0                        | 1                            | Hypothetical protein (1)                                     |                                                                                                                                                                                                                                                                                                                                                                                           |                                                                                                                                                                            | -                               | -                           | P_trifoliata_00432_mRNA_19,1    |
| GF0048765 | 0                            | 0                        | 1                            | Hypothetical protein (1)                                     |                                                                                                                                                                                                                                                                                                                                                                                           | Viral movement protein [IPR028919] (1)                                                                                                                                     | -                               | -                           | P_trifoliata_00432_mRNA_17,1    |
| GF0048764 | 0                            | 0                        | 1                            | Hypothetical protein (1)                                     |                                                                                                                                                                                                                                                                                                                                                                                           |                                                                                                                                                                            | -                               | -                           | P_trifoliata_00432_mRNA_16,1    |
| GF0048763 | 0                            | 0                        | 1                            | Hypothetical protein (1)                                     |                                                                                                                                                                                                                                                                                                                                                                                           |                                                                                                                                                                            | -                               | -                           | P_trifoliata_00432_mRNA_15,1    |
| GF0048762 | 0                            | 0                        | 1                            | Hypothetical protein (1)                                     |                                                                                                                                                                                                                                                                                                                                                                                           |                                                                                                                                                                            | -                               | -                           | P_trifoliata_00432_mRNA_13,1    |
| GF0048761 | 0                            | 0                        | 1                            | Hypothetical protein (1)                                     |                                                                                                                                                                                                                                                                                                                                                                                           |                                                                                                                                                                            | -                               | -                           | P_trifoliata_00432_mRNA_12,1    |
| GF0048760 | 0                            | 0                        | 1                            | Hypothetical protein (1)                                     |                                                                                                                                                                                                                                                                                                                                                                                           |                                                                                                                                                                            | -                               | -                           | P_trifoliata_00431_mRNA_9,1     |
| GF0048759 | 0                            | 0                        | 1                            | Hypothetical protein (1)                                     |                                                                                                                                                                                                                                                                                                                                                                                           |                                                                                                                                                                            | -                               | -                           | P_trifoliata_00431_mRNA_35,1    |
| GF0048758 | 0                            | 0                        | 1                            | Hypothetical protein (1)                                     |                                                                                                                                                                                                                                                                                                                                                                                           | Aminotransferase-like, plant mobile domain [IPR019557] (1); Protein of unknown function DUF716 (TFEM45) [IPR006904] (1)                                                    | -                               | -                           | P_trifoliata_00431_mRNA_30,1    |
| GF0048757 | 0                            | 0                        | 1                            | Cytochrome P450 716B1 (1)                                    | iron ion binding [GO:0005506 molecular_function] (1); heme binding [GO:0020037 molecular_function] (1); oxidation-reduction process [GO:005514 biological_process] (1); oxidoreductase activity, acting on paired donors, with incorporation or reduction of molecular oxygen [GO:0016705 molecular_function] (1)                                                                         | Cytochrome P450 [IPR001128] (1)                                                                                                                                            | -                               | -                           | P_trifoliata_00431_mRNA_23,1    |
| GF0048756 | 0                            | 0                        | 1                            | Hypothetical protein (1)                                     |                                                                                                                                                                                                                                                                                                                                                                                           |                                                                                                                                                                            | -                               | -                           | P_trifoliata_00431_mRNA_22,1    |
| GF0048755 | 0                            | 0                        | 1                            | Hypothetical protein (1)                                     |                                                                                                                                                                                                                                                                                                                                                                                           |                                                                                                                                                                            | -                               | -                           | P_trifoliata_00431_mRNA_14,1    |
| GF0048754 | 0                            | 0                        | 1                            | Hypothetical protein (1)                                     |                                                                                                                                                                                                                                                                                                                                                                                           |                                                                                                                                                                            | -                               | -                           | P_trifoliata_00431_mRNA_13,1    |
| GF0048753 | 0                            | 0                        | 1                            | Cytokinin riboside 5'-monophosphate phosphoribohydrolase (1) |                                                                                                                                                                                                                                                                                                                                                                                           |                                                                                                                                                                            | -                               | -                           | P_trifoliata_00431_mRNA_11,1    |
| GF0048752 | 0                            | 0                        | 1                            | Hypothetical protein (1)                                     |                                                                                                                                                                                                                                                                                                                                                                                           |                                                                                                                                                                            | -                               | -                           | P_trifoliata_00431_mRNA_1,1     |
| GF0048751 | 0                            | 0                        | 1                            | Hypothetical protein (1)                                     |                                                                                                                                                                                                                                                                                                                                                                                           |                                                                                                                                                                            | -                               | -                           | P_trifoliata_00430_mRNA_8,1     |
| GF0048750 | 0                            | 0                        | 1                            | Hypothetical protein (1)                                     | nucleoside diphosphate phosphorylation [GO:0006165 biological_process] (1); UTP biosynthetic process [GO:0006228 biological_process] (1); CTP biosynthetic process [GO:0006241 biological_process] (1); nucleoside diphosphate kinase activity [GO:0004550 molecular_function] (1); GTP biosynthetic process [GO:0006183 biological_process] (1)                                          | Nucleoside diphosphate kinase [IPR001564] (1)                                                                                                                              | -                               | -                           | P_trifoliata_00430_mRNA_7,1     |
| GF0048749 | 0                            | 0                        | 1                            | Hypothetical protein (1)                                     |                                                                                                                                                                                                                                                                                                                                                                                           |                                                                                                                                                                            | -                               | -                           | P_trifoliata_00430_mRNA_6,1     |
| GF0048748 | 0                            | 0                        | 1                            | Hypothetical protein (1)                                     |                                                                                                                                                                                                                                                                                                                                                                                           |                                                                                                                                                                            | -                               | -                           | P_trifoliata_00430_mRNA_4,1     |
| GF0048747 | 0                            | 0                        | 1                            | Hypothetical protein (1)                                     |                                                                                                                                                                                                                                                                                                                                                                                           | Leucine-rich repeat domain, L domain-like [IPR032675] (1)                                                                                                                  | -                               | -                           | P_trifoliata_00430_mRNA_21,1    |
| GF0048746 | 0                            | 0                        | 1                            | Hypothetical protein (1)                                     |                                                                                                                                                                                                                                                                                                                                                                                           | Leucine-rich repeat domain, L domain-like [IPR032675] (1)                                                                                                                  | -                               | -                           | P_trifoliata_00430_mRNA_20,1    |
| GF0048745 | 0                            | 0                        | 1                            | Hypothetical protein (1)                                     |                                                                                                                                                                                                                                                                                                                                                                                           | Leucine-rich repeat domain, L domain-like [IPR032675] (1)                                                                                                                  | -                               | -                           | P_trifoliata_00430_mRNA_17,1    |
| GF0048744 | 0                            | 0                        | 1                            | Hypothetical protein (1)                                     | L-ascorbic acid binding [GO:0031418 molecular_function] (1); oxidation-reduction process [GO:005514 biological_process] (1); oxidoreductase activity [GO:0016491 molecular_function] (1); oxidoreductase activity, acting on paired donors, with incorporation or reduction of molecular oxygen [GO:0016705 molecular_function] (1); iron ion binding [GO:0005506 molecular_function] (1) | Prolyl 4-hydroxylase, alpha subunit [IPR006620] (1); HAD-like domain [IPR023214] (1); SRAK domain [IPR003582] (1); Oxophthalate/iron-dependent dioxygenase [IPR005123] (1) | -                               | -                           | P_trifoliata_00430_mRNA_1,1     |
| GF0048743 | 0                            | 0                        | 1                            | Hypothetical protein (1)                                     |                                                                                                                                                                                                                                                                                                                                                                                           |                                                                                                                                                                            | -                               | -                           | P_trifoliata_00429_mRNA_5,1     |
| GF0048742 | 0                            | 0                        | 1                            | Hypothetical protein (1)                                     |                                                                                                                                                                                                                                                                                                                                                                                           |                                                                                                                                                                            | -                               | -                           | P_trifoliata_00429_mRNA_4,1     |
| GF0048741 | 0                            | 0                        | 1                            | Hypothetical protein (1)                                     |                                                                                                                                                                                                                                                                                                                                                                                           |                                                                                                                                                                            | -                               | -                           | P_trifoliata_00429_mRNA_3,1     |
| GF0048740 | 0                            | 0                        | 1                            | Hypothetical protein (1)                                     | zinc ion binding [GO:0008270 molecular_function] (1); nucleic acid binding [GO:0003676 molecular_function] (1)                                                                                                                                                                                                                                                                            | Reverse transcriptase zinc-binding domain [IPR020960] (1); Zinc knuckle CX2CX4HXAC [IPR025836] (1); Zinc finger, CCHC-type [IPR001878] (1)                                 | -                               | -                           | P_trifoliata_00429_mRNA_24,1    |
| GF0048739 | 0                            | 0                        | 1                            | Cytochrome P450 83B1 (1)                                     | oxidation-reduction process [GO:005514 biological_process] (1); oxidoreductase activity, acting on paired donors, with incorporation or reduction of molecular oxygen [GO:0016705 molecular_function] (1); heme binding [GO:0020037 molecular_function] (1); iron ion binding [GO:0005506 molecular_function] (1)                                                                         | Cytochrome P450 [IPR001128] (1); Cytochrome P450, E-class, group 1 [IPR002401] (1)                                                                                         | -                               | -                           | P_trifoliata_00429_mRNA_22,1    |
| GF0048738 | 0                            | 0                        | 1                            | Hypothetical protein (1)                                     |                                                                                                                                                                                                                                                                                                                                                                                           |                                                                                                                                                                            | -                               | -                           | P_trifoliata_00429_mRNA_21,1    |
| GF0048737 | 0                            | 0                        | 1                            | Hypothetical protein (1)                                     |                                                                                                                                                                                                                                                                                                                                                                                           |                                                                                                                                                                            | -                               | -                           | P_trifoliata_00429_mRNA_2,1     |
| GF0048736 | 0                            | 0                        | 1                            | Hypothetical protein (1)                                     |                                                                                                                                                                                                                                                                                                                                                                                           |                                                                                                                                                                            | -                               | -                           | P_trifoliata_00429_mRNA_18,1    |
| GF0048735 | 0                            | 0                        | 1                            | Hypothetical protein (1)                                     |                                                                                                                                                                                                                                                                                                                                                                                           |                                                                                                                                                                            | -                               | -                           | P_trifoliata_00428_mRNA_9,1     |
| GF0048734 | 0                            | 0                        | 1                            | Hypothetical protein (1)                                     |                                                                                                                                                                                                                                                                                                                                                                                           |                                                                                                                                                                            | -                               | -                           | P_trifoliata_00428_mRNA_32,1    |
| GF0048733 | 0                            | 0                        | 1                            | Hypothetical protein (1)                                     |                                                                                                                                                                                                                                                                                                                                                                                           |                                                                                                                                                                            | -                               | -                           | P_trifoliata_00428_mRNA_31,1    |
| GF0048732 | 0                            | 0                        | 1                            | Hypothetical protein (1)                                     |                                                                                                                                                                                                                                                                                                                                                                                           |                                                                                                                                                                            | -                               | -                           | P_trifoliata_00428_mRNA_3,1     |
| GF0048731 | 0                            | 0                        | 1                            | Translation initiation factor IF-2, putative (1)             |                                                                                                                                                                                                                                                                                                                                                                                           | Protein of unknown function DUF674 [IPR007750] (1)                                                                                                                         | -                               | -                           | P_trifoliata_00428_mRNA_25,1    |
| GF0048730 | 0                            | 0                        | 1                            | Hypothetical protein (1)                                     |                                                                                                                                                                                                                                                                                                                                                                                           |                                                                                                                                                                            | -                               | -                           | P_trifoliata_00428_mRNA_13,1    |
| GF0048729 | 0                            | 0                        | 1                            | Hypothetical protein (1)                                     |                                                                                                                                                                                                                                                                                                                                                                                           |                                                                                                                                                                            | -                               | -                           | P_trifoliata_00427_mRNA_26,1    |
| GF0048728 | 0                            | 0                        | 1                            | Hypothetical protein (1)                                     |                                                                                                                                                                                                                                                                                                                                                                                           | Leucine-rich repeat domain, L domain-like [IPR032675] (1)                                                                                                                  | -                               | -                           | P_trifoliata_00427_mRNA_2,1     |
| GF0048727 | 0                            | 0                        | 1                            | Hypothetical protein (1)                                     |                                                                                                                                                                                                                                                                                                                                                                                           |                                                                                                                                                                            | -                               | -                           | P_trifoliata_00427_mRNA_18,1    |
| GF0048726 | 0                            | 0                        | 1                            | Hypothetical protein (1)                                     |                                                                                                                                                                                                                                                                                                                                                                                           |                                                                                                                                                                            | -                               | -                           | P_trifoliata_00427_mRNA_15,1    |
| GF0048725 | 0                            | 0                        | 1                            | Hypothetical protein (1)                                     |                                                                                                                                                                                                                                                                                                                                                                                           |                                                                                                                                                                            | -                               | -                           | P_trifoliata_00427_mRNA_14,1    |
| GF0048724 | 0                            | 0                        | 1                            | Hypothetical protein (1)                                     |                                                                                                                                                                                                                                                                                                                                                                                           |                                                                                                                                                                            | -                               | -                           | P_trifoliata_00427_mRNA_12,1    |
| GF0048723 | 0                            | 0                        | 1                            | Hypothetical protein (1)                                     |                                                                                                                                                                                                                                                                                                                                                                                           |                                                                                                                                                                            | -                               | -                           | P_trifoliata_00426_mRNA_9,1     |
| GF0048722 | 0                            | 0                        | 1                            | Hypothetical protein (1)                                     | nucleic acid binding [GO:0003676 molecular_function] (1)                                                                                                                                                                                                                                                                                                                                  | Aspartic peptidase domain [IPR021099] (1); Ribonuclease H-like domain [IPR012337] (1)                                                                                      | -                               | -                           | P_trifoliata_00426_mRNA_7,1     |
| GF0048721 | 0                            | 0                        | 1                            | Hypothetical protein (1)                                     |                                                                                                                                                                                                                                                                                                                                                                                           |                                                                                                                                                                            | -                               | -                           | P_trifoliata_00426_mRNA_5,1     |
| GF0048720 | 0                            | 0                        | 1                            | Hypothetical protein (1)                                     |                                                                                                                                                                                                                                                                                                                                                                                           |                                                                                                                                                                            | -                               | -                           | P_trifoliata_00426_mRNA_1,1     |
| GF0048719 | 0                            | 0                        | 1                            | Hypothetical protein (1)                                     |                                                                                                                                                                                                                                                                                                                                                                                           |                                                                                                                                                                            | -                               | -                           | P_trifoliata_00425_mRNA_9,1     |
| GF0048718 | 0                            | 0                        | 1                            | Hypothetical protein (1)                                     |                                                                                                                                                                                                                                                                                                                                                                                           |                                                                                                                                                                            | -                               | -                           | P_trifoliata_00425_mRNA_6,1     |
| GF0048717 | 0                            | 0                        | 1                            | Hypothetical protein (1)                                     |                                                                                                                                                                                                                                                                                                                                                                                           |                                                                                                                                                                            | -                               | -                           | P_trifoliata_00425_mRNA_5,1     |
| GF0048716 | 0                            | 0                        | 1                            | Hypothetical protein (1)                                     |                                                                                                                                                                                                                                                                                                                                                                                           |                                                                                                                                                                            | -                               | -                           | P_trifoliata_00425_mRNA_23,1    |
| GF0048715 | 0                            | 0                        | 1                            | Hypothetical protein (1)                                     |                                                                                                                                                                                                                                                                                                                                                                                           |                                                                                                                                                                            | -                               | -                           | P_trifoliata_00425_mRNA_22,1    |
| GF0048714 | 0                            | 0                        | 1                            | Hypothetical protein (1)                                     |                                                                                                                                                                                                                                                                                                                                                                                           | Pentatricopeptide repeat [IPR002885] (1)                                                                                                                                   | -                               | -                           | P_trifoliata_00425_mRNA_21,1    |
| GF0048713 | 0                            | 0                        | 1                            | Hypothetical protein (1)                                     |                                                                                                                                                                                                                                                                                                                                                                                           |                                                                                                                                                                            | -                               | -                           | P_trifoliata_00425_mRNA_16,1    |
| GF0048712 | 0                            | 0                        | 1                            | Hypothetical protein (1)                                     |                                                                                                                                                                                                                                                                                                                                                                                           |                                                                                                                                                                            | -                               | -                           | P_trifoliata_00425_mRNA_10,1    |
| GF0048711 | 0                            | 0                        | 1                            | Cytochrome P450 716B1 (1)                                    | heme binding [GO:0020037 molecular_function] (1); iron ion binding [GO:0005506 molecular_function] (1); oxidation-reduction process [GO:005514 biological_process] (1); oxidoreductase activity, acting on paired donors, with incorporation or reduction of molecular oxygen [GO:0016705 molecular_function] (1)                                                                         | Cytochrome P450, conserved site [IPR017972] (1); Cytochrome P450, E-class, group 1 [IPR002401] (1); Cytochrome P450 [IPR001128] (1)                                        | -                               | -                           | P_trifoliata_00425_mRNA_1,1     |
| GF0048710 | 0                            | 0                        | 1                            | Hypothetical protein (1)                                     |                                                                                                                                                                                                                                                                                                                                                                                           |                                                                                                                                                                            | -                               | -                           | P_trifoliata_00424_mRNA_21,1    |
| GF0048709 | 0                            | 0                        | 1                            | GRAM domain protein/ABA-responsive-like protein (1)          |                                                                                                                                                                                                                                                                                                                                                                                           | GRAM domain [IPR004182] (1)                                                                                                                                                | -                               | -                           | P_trifoliata_00424_mRNA_14,1    |
| GF0048708 | 0                            | 0                        | 1                            | Hypothetical protein (1)                                     |                                                                                                                                                                                                                                                                                                                                                                                           |                                                                                                                                                                            | -                               | -                           | P_trifoliata_00424_mRNA_1,1     |
| GF0048707 | 0                            | 0                        | 1                            | Hypothetical protein (1)                                     |                                                                                                                                                                                                                                                                                                                                                                                           |                                                                                                                                                                            | -                               | -                           | P_trifoliata_00423_mRNA_9,1     |
| GF0048706 | 0                            | 0                        | 1                            | Hypothetical protein (1)                                     |                                                                                                                                                                                                                                                                                                                                                                                           |                                                                                                                                                                            | -                               | -                           | P_trifoliata_00423_mRNA_8,1     |
| GF0048705 | 0                            | 0                        | 1                            | Hypothetical protein (1)                                     |                                                                                                                                                                                                                                                                                                                                                                                           |                                                                                                                                                                            | -                               | -                           | P_trifoliata_00423_mRNA_7,1     |
| GF0048704 | 0                            | 0                        | 1                            | Hypothetical protein (1)                                     |                                                                                                                                                                                                                                                                                                                                                                                           |                                                                                                                                                                            | -                               | -                           | P_trifoliata_00423_mRNA_6,1     |
| GF0048703 | 0                            | 0                        | 1                            | Hypothetical protein (1)                                     |                                                                                                                                                                                                                                                                                                                                                                                           | SAP domain [IPR003034] (1)                                                                                                                                                 | -                               | -                           | P_trifoliata_00423_mRNA_33,1    |
| GF0048702 | 0                            | 0                        | 1                            | CD2 antigen cytoplasmic tail-binding 2 (1)                   |                                                                                                                                                                                                                                                                                                                                                                                           | EF-Hand 1, calcium-binding site [IPR018247] (1)                                                                                                                            | -                               | -                           | P_trifoliata_00423_mRNA_3,1     |
| GF0048701 | 0                            | 0                        | 1                            | Hypothetical protein (1)                                     |                                                                                                                                                                                                                                                                                                                                                                                           |                                                                                                                                                                            | -                               | -                           | P_trifoliata_00423_mRNA_28,1    |

| ID        | Num. in <i>C. clementiae</i> | Num. in <i>C. canihii</i> | Num. in <i>P. trifoliata</i> | Note                                                              | GO                                                                                                                                                                                                                | InterPro                                                                                                                                                    | Members in <i>C. clementiae</i> | Members in <i>C. canihii</i> | Members in <i>P. trifoliata</i> |
|-----------|------------------------------|---------------------------|------------------------------|-------------------------------------------------------------------|-------------------------------------------------------------------------------------------------------------------------------------------------------------------------------------------------------------------|-------------------------------------------------------------------------------------------------------------------------------------------------------------|---------------------------------|------------------------------|---------------------------------|
| GF0048700 | 0                            | 0                         | 1                            | Putative disease resistance protein RGA1 (1)                      |                                                                                                                                                                                                                   |                                                                                                                                                             |                                 |                              | P_trifoliata_00423_mRNA_27.1    |
| GF0048699 | 0                            | 0                         | 1                            | Hypothetical protein (1)                                          |                                                                                                                                                                                                                   |                                                                                                                                                             |                                 |                              | P_trifoliata_00423_mRNA_26.1    |
| GF0048698 | 0                            | 0                         | 1                            | Hypothetical protein (1)                                          |                                                                                                                                                                                                                   | Leucine-rich repeat domain, L domain-like [IPR032675] (1)                                                                                                   |                                 |                              | P_trifoliata_00423_mRNA_21.1    |
| GF0048697 | 0                            | 0                         | 1                            | Hypothetical protein (1)                                          | oxidation-reduction process [GO:005114 biological_process] (1); oxidoreductase activity [GO:0016491 molecular_function] (1)                                                                                       | Multicopper oxidase, type 1 [IPR01117] (1); Cupredoxin [IPR008972] (1)                                                                                      |                                 |                              | P_trifoliata_00423_mRNA_14.1    |
| GF0048696 | 0                            | 0                         | 1                            | Hypothetical protein (1)                                          |                                                                                                                                                                                                                   |                                                                                                                                                             |                                 |                              | P_trifoliata_00423_mRNA_11.1    |
| GF0048695 | 0                            | 0                         | 1                            | Hypothetical protein (1)                                          |                                                                                                                                                                                                                   |                                                                                                                                                             |                                 |                              | P_trifoliata_00423_mRNA_10.1    |
| GF0048694 | 0                            | 0                         | 1                            | Hypothetical protein (1)                                          | copper ion binding [GO:0005507 molecular_function] (1); oxidoreductase activity [GO:0016491 molecular_function] (1); oxidation-reduction process [GO:005114 biological_process] (1)                               | Multicopper oxidases, conserved site [IPR033138] (1); Multicopper oxidase, type 2 [IPR011706] (1); Cupredoxin [IPR008972] (1)                               |                                 |                              | P_trifoliata_00423_mRNA_1.1     |
| GF0048693 | 0                            | 0                         | 1                            | Hypothetical protein (1)                                          |                                                                                                                                                                                                                   |                                                                                                                                                             |                                 |                              | P_trifoliata_00422_mRNA_7.1     |
| GF0048692 | 0                            | 0                         | 1                            | Hypothetical protein (1)                                          |                                                                                                                                                                                                                   |                                                                                                                                                             |                                 |                              | P_trifoliata_00422_mRNA_33.1    |
| GF0048691 | 0                            | 0                         | 1                            | Hypothetical protein (1)                                          |                                                                                                                                                                                                                   |                                                                                                                                                             |                                 |                              | P_trifoliata_00422_mRNA_30.1    |
| GF0048690 | 0                            | 0                         | 1                            | Hypothetical protein (1)                                          |                                                                                                                                                                                                                   |                                                                                                                                                             |                                 |                              | P_trifoliata_00421_mRNA_9.1     |
| GF0048689 | 0                            | 0                         | 1                            | Hypothetical protein (1)                                          |                                                                                                                                                                                                                   |                                                                                                                                                             |                                 |                              | P_trifoliata_00421_mRNA_7.1     |
| GF0048688 | 0                            | 0                         | 1                            | Hypothetical protein (1)                                          |                                                                                                                                                                                                                   |                                                                                                                                                             |                                 |                              | P_trifoliata_00421_mRNA_5.1     |
| GF0048687 | 0                            | 0                         | 1                            | Hypothetical protein (1)                                          |                                                                                                                                                                                                                   |                                                                                                                                                             |                                 |                              | P_trifoliata_00421_mRNA_3.1     |
| GF0048686 | 0                            | 0                         | 1                            | Hypothetical protein (1)                                          | oxidation-reduction process [GO:005114 biological_process] (1); oxidoreductase activity [GO:0016491 molecular_function] (1)                                                                                       | Non-haem oxygenase N-terminal domain [IPR026992] (1); Isopenicillin N synthase-like [IPR027443] (1); Oxooglutarate-iron-dependent oxygenase [IPR005123] (1) |                                 |                              | P_trifoliata_00421_mRNA_23.1    |
| GF0048685 | 0                            | 0                         | 1                            | Hypothetical protein (1)                                          |                                                                                                                                                                                                                   |                                                                                                                                                             |                                 |                              | P_trifoliata_00421_mRNA_22.1    |
| GF0048684 | 0                            | 0                         | 1                            | Hypothetical protein (1)                                          |                                                                                                                                                                                                                   |                                                                                                                                                             |                                 |                              | P_trifoliata_00421_mRNA_12.1    |
| GF0048683 | 0                            | 0                         | 1                            | Hypothetical protein (1)                                          |                                                                                                                                                                                                                   | Reverse transcriptase zinc-binding domain [IPR026960] (1)                                                                                                   |                                 |                              | P_trifoliata_00420_mRNA_9.1     |
| GF0048682 | 0                            | 0                         | 1                            | Hypothetical protein (1)                                          |                                                                                                                                                                                                                   |                                                                                                                                                             |                                 |                              | P_trifoliata_00420_mRNA_7.1     |
| GF0048681 | 0                            | 0                         | 1                            | Mitochondrial import inner membrane translocase subunit TIM14 (1) |                                                                                                                                                                                                                   | DnaJ domain [IPR016123] (1)                                                                                                                                 |                                 |                              | P_trifoliata_00420_mRNA_5.1     |
| GF0048680 | 0                            | 0                         | 1                            | Hypothetical protein (1)                                          |                                                                                                                                                                                                                   | Leucine-rich repeat domain, L domain-like [IPR032675] (1)                                                                                                   |                                 |                              | P_trifoliata_00420_mRNA_4.1     |
| GF0048679 | 0                            | 0                         | 1                            | Hypothetical protein (1)                                          |                                                                                                                                                                                                                   |                                                                                                                                                             |                                 |                              | P_trifoliata_00420_mRNA_25.1    |
| GF0048678 | 0                            | 0                         | 1                            | Hypothetical protein (1)                                          |                                                                                                                                                                                                                   |                                                                                                                                                             |                                 |                              | P_trifoliata_00420_mRNA_24.1    |
| GF0048677 | 0                            | 0                         | 1                            | Hypothetical protein (1)                                          |                                                                                                                                                                                                                   |                                                                                                                                                             |                                 |                              | P_trifoliata_00420_mRNA_22.1    |
| GF0048676 | 0                            | 0                         | 1                            | Hypothetical protein (1)                                          |                                                                                                                                                                                                                   |                                                                                                                                                             |                                 |                              | P_trifoliata_00420_mRNA_20.1    |
| GF0048675 | 0                            | 0                         | 1                            | Hypothetical protein (1)                                          |                                                                                                                                                                                                                   | Leucine-rich repeat domain, L domain-like [IPR032675] (1)                                                                                                   |                                 |                              | P_trifoliata_00420_mRNA_2.1     |
| GF0048674 | 0                            | 0                         | 1                            | Hypothetical protein (1)                                          |                                                                                                                                                                                                                   |                                                                                                                                                             |                                 |                              | P_trifoliata_00420_mRNA_18.1    |
| GF0048673 | 0                            | 0                         | 1                            | Hypothetical protein (1)                                          |                                                                                                                                                                                                                   |                                                                                                                                                             |                                 |                              | P_trifoliata_00420_mRNA_17.1    |
| GF0048672 | 0                            | 0                         | 1                            | Hypothetical protein (1)                                          |                                                                                                                                                                                                                   | Transposase, MuDR, plant [IPR004332] (1)                                                                                                                    |                                 |                              | P_trifoliata_00420_mRNA_12.1    |
| GF0048671 | 0                            | 0                         | 1                            | Hypothetical protein (1)                                          |                                                                                                                                                                                                                   |                                                                                                                                                             |                                 |                              | P_trifoliata_00420_mRNA_10.1    |
| GF0048670 | 0                            | 0                         | 1                            | Hypothetical protein (1)                                          | integral component of membrane [GO:0016021 cellular_component] (1); transmembrane transporter activity [GO:0022857 molecular_function] (1); membrane [GO:0016020 cellular_component] (1)                          | Protein kinase-like domain [IPR011009] (1); EernA domain [IPR006020] (1); WAT1-related protein [IPR030184] (1)                                              |                                 |                              | P_trifoliata_00419_mRNA_9.1     |
| GF0048669 | 0                            | 0                         | 1                            | Hypothetical protein (1)                                          |                                                                                                                                                                                                                   |                                                                                                                                                             |                                 |                              | P_trifoliata_00419_mRNA_8.1     |
| GF0048668 | 0                            | 0                         | 1                            | Hypothetical protein (1)                                          |                                                                                                                                                                                                                   |                                                                                                                                                             |                                 |                              | P_trifoliata_00419_mRNA_7.1     |
| GF0048667 | 0                            | 0                         | 1                            | Hypothetical protein (1)                                          |                                                                                                                                                                                                                   | Leucine-rich repeat domain, L domain-like [IPR032675] (1)                                                                                                   |                                 |                              | P_trifoliata_00419_mRNA_46.1    |
| GF0048666 | 0                            | 0                         | 1                            | Hypothetical protein (1)                                          |                                                                                                                                                                                                                   | Leucine-rich repeat domain, L domain-like [IPR032675] (1)                                                                                                   |                                 |                              | P_trifoliata_00419_mRNA_45.1    |
| GF0048665 | 0                            | 0                         | 1                            | Hypothetical protein (1)                                          |                                                                                                                                                                                                                   |                                                                                                                                                             |                                 |                              | P_trifoliata_00419_mRNA_43.1    |
| GF0048664 | 0                            | 0                         | 1                            | Hypothetical protein (1)                                          |                                                                                                                                                                                                                   |                                                                                                                                                             |                                 |                              | P_trifoliata_00419_mRNA_42.1    |
| GF0048663 | 0                            | 0                         | 1                            | DUF2921 family protein (1)                                        |                                                                                                                                                                                                                   | Protein of unknown function DUF2921 [IPR021319] (1); Reverse transcriptase, RNA-dependent DNA polymerase [IPR013105] (1)                                    |                                 |                              | P_trifoliata_00419_mRNA_40.1    |
| GF0048662 | 0                            | 0                         | 1                            | Hypothetical protein (1)                                          |                                                                                                                                                                                                                   |                                                                                                                                                             |                                 |                              | P_trifoliata_00419_mRNA_4.1     |
| GF0048661 | 0                            | 0                         | 1                            | Hypothetical protein (1)                                          |                                                                                                                                                                                                                   |                                                                                                                                                             |                                 |                              | P_trifoliata_00419_mRNA_39.1    |
| GF0048660 | 0                            | 0                         | 1                            | Hypothetical protein (1)                                          |                                                                                                                                                                                                                   |                                                                                                                                                             |                                 |                              | P_trifoliata_00419_mRNA_35.1    |
| GF0048659 | 0                            | 0                         | 1                            | Hypothetical protein (1)                                          |                                                                                                                                                                                                                   |                                                                                                                                                             |                                 |                              | P_trifoliata_00419_mRNA_31.1    |
| GF0048658 | 0                            | 0                         | 1                            | Hypothetical protein (1)                                          |                                                                                                                                                                                                                   |                                                                                                                                                             |                                 |                              | P_trifoliata_00419_mRNA_30.1    |
| GF0048657 | 0                            | 0                         | 1                            | Hypothetical protein (1)                                          |                                                                                                                                                                                                                   |                                                                                                                                                             |                                 |                              | P_trifoliata_00419_mRNA_3.1     |
| GF0048656 | 0                            | 0                         | 1                            | Hypothetical protein (1)                                          |                                                                                                                                                                                                                   |                                                                                                                                                             |                                 |                              | P_trifoliata_00419_mRNA_27.1    |
| GF0048655 | 0                            | 0                         | 1                            | Hypothetical protein (1)                                          |                                                                                                                                                                                                                   |                                                                                                                                                             |                                 |                              | P_trifoliata_00419_mRNA_26.1    |
| GF0048654 | 0                            | 0                         | 1                            | Hypothetical protein (1)                                          |                                                                                                                                                                                                                   |                                                                                                                                                             |                                 |                              | P_trifoliata_00419_mRNA_25.1    |
| GF0048653 | 0                            | 0                         | 1                            | Hypothetical protein (1)                                          |                                                                                                                                                                                                                   |                                                                                                                                                             |                                 |                              | P_trifoliata_00419_mRNA_24.1    |
| GF0048652 | 0                            | 0                         | 1                            | Hypothetical protein (1)                                          |                                                                                                                                                                                                                   |                                                                                                                                                             |                                 |                              | P_trifoliata_00419_mRNA_2.1     |
| GF0048651 | 0                            | 0                         | 1                            | Hypothetical protein (1)                                          |                                                                                                                                                                                                                   |                                                                                                                                                             |                                 |                              | P_trifoliata_00419_mRNA_19.1    |
| GF0048650 | 0                            | 0                         | 1                            | Hypothetical protein (1)                                          |                                                                                                                                                                                                                   |                                                                                                                                                             |                                 |                              | P_trifoliata_00419_mRNA_16.1    |
| GF0048649 | 0                            | 0                         | 1                            | Hypothetical protein (1)                                          |                                                                                                                                                                                                                   |                                                                                                                                                             |                                 |                              | P_trifoliata_00419_mRNA_15.1    |
| GF0048648 | 0                            | 0                         | 1                            | Hypothetical protein (1)                                          |                                                                                                                                                                                                                   |                                                                                                                                                             |                                 |                              | P_trifoliata_00419_mRNA_14.1    |
| GF0048647 | 0                            | 0                         | 1                            | Hypothetical protein (1)                                          |                                                                                                                                                                                                                   |                                                                                                                                                             |                                 |                              | P_trifoliata_00419_mRNA_12.1    |
| GF0048646 | 0                            | 0                         | 1                            | Hypothetical protein (1)                                          |                                                                                                                                                                                                                   | Viral movement protein [IPR028919] (1)                                                                                                                      |                                 |                              | P_trifoliata_00419_mRNA_11.1    |
| GF0048645 | 0                            | 0                         | 1                            | Hypothetical protein (1)                                          |                                                                                                                                                                                                                   |                                                                                                                                                             |                                 |                              | P_trifoliata_00418_mRNA_18.1    |
| GF0048644 | 0                            | 0                         | 1                            | Hypothetical protein (1)                                          |                                                                                                                                                                                                                   |                                                                                                                                                             |                                 |                              | P_trifoliata_00418_mRNA_13.1    |
| GF0048643 | 0                            | 0                         | 1                            | Hypothetical protein (1)                                          |                                                                                                                                                                                                                   |                                                                                                                                                             |                                 |                              | P_trifoliata_00418_mRNA_10.1    |
| GF0048642 | 0                            | 0                         | 1                            | Hypothetical protein (1)                                          |                                                                                                                                                                                                                   |                                                                                                                                                             |                                 |                              | P_trifoliata_00418_mRNA_1.1     |
| GF0048641 | 0                            | 0                         | 1                            | Galactosyltransferase family protein (1)                          | galactosyltransferase activity [GO:0008378 molecular_function] (1); membrane [GO:0016020 cellular_component] (1); protein glycosylation [GO:0006486 biological_process] (1)                                       | Domain of unknown function DUF4094 [IPR023298] (1); Glycosyl transferase, family 31 [IPR026259] (1)                                                         |                                 |                              | P_trifoliata_00417_mRNA_18.1    |
| GF0048640 | 0                            | 0                         | 1                            | Putative non-LTR retroelement reverse transcriptase (1)           |                                                                                                                                                                                                                   | Reverse transcriptase domain [IPR000477] (1)                                                                                                                |                                 |                              | P_trifoliata_00416_mRNA_9.1     |
| GF0048639 | 0                            | 0                         | 1                            | Hypothetical protein (1)                                          | zinc ion binding [GO:0008270 molecular_function] (1); nucleic acid binding [GO:0003676 molecular_function] (1)                                                                                                    | Zinc finger, CCHC-type [IPR001878] (1); Zinc knuckle CX3CX4HX4C [IPR025836] (1)                                                                             |                                 |                              | P_trifoliata_00416_mRNA_8.1     |
| GF0048638 | 0                            | 0                         | 1                            | Hypothetical protein (1)                                          |                                                                                                                                                                                                                   |                                                                                                                                                             |                                 |                              | P_trifoliata_00416_mRNA_7.1     |
| GF0048637 | 0                            | 0                         | 1                            | Putative Leucine Rich Repeat Protein (1)                          | protein binding [GO:0005515 molecular_function] (1)                                                                                                                                                               | Leucine-rich repeat domain, L domain-like [IPR032675] (1); Leucine-rich repeat [IPR001611] (1)                                                              |                                 |                              | P_trifoliata_00416_mRNA_6.1     |
| GF0048636 | 0                            | 0                         | 1                            | U3 small molecular RNA-associated protein 18 homolog (1)          | protein binding [GO:0005515 molecular_function] (1)                                                                                                                                                               | WD40/YVTN repeat-like-containing domain [IPR015943] (1); WD40-repeat-containing domain [IPR017986] (1); WD40 repeat [IPR001680] (1)                         |                                 |                              | P_trifoliata_00416_mRNA_25.1    |
| GF0048635 | 0                            | 0                         | 1                            | Hypothetical protein (1)                                          | nucleic acid binding [GO:0003676 molecular_function] (1); nucleoside binding [GO:0000166 molecular_function] (1)                                                                                                  | RNA recognition motif domain [IPR000504] (1); Nucleoside-binding alpha-beta plant domain [IPR012677] (1)                                                    |                                 |                              | P_trifoliata_00416_mRNA_23.1    |
| GF0048634 | 0                            | 0                         | 1                            | Hypothetical protein (1)                                          |                                                                                                                                                                                                                   |                                                                                                                                                             |                                 |                              | P_trifoliata_00416_mRNA_21.1    |
| GF0048633 | 0                            | 0                         | 1                            | Hypothetical protein (1)                                          |                                                                                                                                                                                                                   |                                                                                                                                                             |                                 |                              | P_trifoliata_00416_mRNA_12.1    |
| GF0048632 | 0                            | 0                         | 1                            | Hypothetical protein (1)                                          |                                                                                                                                                                                                                   |                                                                                                                                                             |                                 |                              | P_trifoliata_00416_mRNA_1.1     |
| GF0048631 | 0                            | 0                         | 1                            | Hypothetical protein (1)                                          |                                                                                                                                                                                                                   |                                                                                                                                                             |                                 |                              | P_trifoliata_00415_mRNA_9.1     |
| GF0048630 | 0                            | 0                         | 1                            | Hypothetical protein (1)                                          |                                                                                                                                                                                                                   |                                                                                                                                                             |                                 |                              | P_trifoliata_00415_mRNA_4.1     |
| GF0048629 | 0                            | 0                         | 1                            | Hypothetical protein (1)                                          |                                                                                                                                                                                                                   |                                                                                                                                                             |                                 |                              | P_trifoliata_00415_mRNA_30.1    |
| GF0048628 | 0                            | 0                         | 1                            | Hypothetical protein (1)                                          |                                                                                                                                                                                                                   |                                                                                                                                                             |                                 |                              | P_trifoliata_00415_mRNA_29.1    |
| GF0048627 | 0                            | 0                         | 1                            | Hypothetical protein (1)                                          |                                                                                                                                                                                                                   |                                                                                                                                                             |                                 |                              | P_trifoliata_00415_mRNA_28.1    |
| GF0048626 | 0                            | 0                         | 1                            | Hypothetical protein (1)                                          |                                                                                                                                                                                                                   |                                                                                                                                                             |                                 |                              | P_trifoliata_00415_mRNA_25.1    |
| GF0048625 | 0                            | 0                         | 1                            | Hypothetical protein (1)                                          |                                                                                                                                                                                                                   |                                                                                                                                                             |                                 |                              | P_trifoliata_00415_mRNA_24.1    |
| GF0048624 | 0                            | 0                         | 1                            | Hypothetical protein (1)                                          |                                                                                                                                                                                                                   |                                                                                                                                                             |                                 |                              | P_trifoliata_00415_mRNA_19.1    |
| GF0048623 | 0                            | 0                         | 1                            | Hypothetical protein (1)                                          |                                                                                                                                                                                                                   |                                                                                                                                                             |                                 |                              | P_trifoliata_00415_mRNA_12.1    |
| GF0048622 | 0                            | 0                         | 1                            | Hypothetical protein (1)                                          |                                                                                                                                                                                                                   |                                                                                                                                                             |                                 |                              | P_trifoliata_00415_mRNA_11.1    |
| GF0048621 | 0                            | 0                         | 1                            | Hypothetical protein (1)                                          |                                                                                                                                                                                                                   |                                                                                                                                                             |                                 |                              | P_trifoliata_00415_mRNA_1.1     |
| GF0048620 | 0                            | 0                         | 1                            | Hypothetical protein (1)                                          |                                                                                                                                                                                                                   |                                                                                                                                                             |                                 |                              | P_trifoliata_00414_mRNA_4.1     |
| GF0048619 | 0                            | 0                         | 1                            | Hypothetical protein (1)                                          |                                                                                                                                                                                                                   |                                                                                                                                                             |                                 |                              | P_trifoliata_00414_mRNA_3.1     |
| GF0048618 | 0                            | 0                         | 1                            | Oligopeptide transporter 4 (1)                                    | nucleoside-containing compound metabolic process [GO:0006139 biological_process] (1); methyltransferase activity [GO:0008168 molecular_function] (1); transmembrane transport [GO:0055085 biological_process] (1) | Oligopeptide transporter, OPT superfamily [IPR008813] (1); S-adenosyl-L-methionine-dependent methyltransferase [IPR020631] (1); MT-A70-like [IPR007757] (1) |                                 |                              | P_trifoliata_00414_mRNA_20.1    |
| GF0048617 | 0                            | 0                         | 1                            | Hypothetical protein (1)                                          |                                                                                                                                                                                                                   |                                                                                                                                                             |                                 |                              | P_trifoliata_00413_mRNA_8.1     |
| GF0048616 | 0                            | 0                         | 1                            | Hypothetical protein (1)                                          |                                                                                                                                                                                                                   | Myo-inositol-1-phosphate synthase, GAPDH-like [IPR013021] (1)                                                                                               |                                 |                              | P_trifoliata_00413_mRNA_3.1     |
| GF0048615 | 0                            | 0                         | 1                            | Hypothetical protein (1)                                          |                                                                                                                                                                                                                   | Peptidic repeat [IPR020885] (1)                                                                                                                             |                                 |                              | P_trifoliata_00413_mRNA_19.1    |
| GF0048614 | 0                            | 0                         | 1                            | Hypothetical protein (1)                                          |                                                                                                                                                                                                                   |                                                                                                                                                             |                                 |                              | P_trifoliata_00413_mRNA_13.1    |

| ID        | Num. in <i>C. clementiae</i> | Num. in <i>C. autohii</i> | Num. in <i>P. trifoliata</i> | Note                                                                       | GO                                                                                                                                                                                                                                                                                                                                                                                                                                                                                                    | InterPro                                                                                                                                                                                                                                                                                                                                                                                                                                                                                                                                                       | Members in <i>C. clementiae</i> | Members in <i>C. autohii</i> | Members in <i>P. trifoliata</i> |
|-----------|------------------------------|---------------------------|------------------------------|----------------------------------------------------------------------------|-------------------------------------------------------------------------------------------------------------------------------------------------------------------------------------------------------------------------------------------------------------------------------------------------------------------------------------------------------------------------------------------------------------------------------------------------------------------------------------------------------|----------------------------------------------------------------------------------------------------------------------------------------------------------------------------------------------------------------------------------------------------------------------------------------------------------------------------------------------------------------------------------------------------------------------------------------------------------------------------------------------------------------------------------------------------------------|---------------------------------|------------------------------|---------------------------------|
| GF0048613 | 0                            | 0                         | 0                            | 1 Hypothetical protein (1)                                                 |                                                                                                                                                                                                                                                                                                                                                                                                                                                                                                       | Transposase-associated domain [IPRO29480] (1)                                                                                                                                                                                                                                                                                                                                                                                                                                                                                                                  | -                               | -                            | P_trifoliata_00413_mRNA_12,1    |
| GF0048612 | 0                            | 0                         | 0                            | 1 Hypothetical protein (1)                                                 |                                                                                                                                                                                                                                                                                                                                                                                                                                                                                                       |                                                                                                                                                                                                                                                                                                                                                                                                                                                                                                                                                                | -                               | -                            | P_trifoliata_00412_mRNA_6,1     |
| GF0048611 | 0                            | 0                         | 0                            | 1 Hypothetical protein (1)                                                 |                                                                                                                                                                                                                                                                                                                                                                                                                                                                                                       |                                                                                                                                                                                                                                                                                                                                                                                                                                                                                                                                                                | -                               | -                            | P_trifoliata_00412_mRNA_4,1     |
| GF0048610 | 0                            | 0                         | 0                            | 1 Hypothetical protein (1)                                                 |                                                                                                                                                                                                                                                                                                                                                                                                                                                                                                       |                                                                                                                                                                                                                                                                                                                                                                                                                                                                                                                                                                | -                               | -                            | P_trifoliata_00412_mRNA_3,1     |
| GF0048609 | 0                            | 0                         | 0                            | 1 Cell division control protein 2 homolog (1)                              | ATP binding [GO:0005524 molecular_function] (1); protein phosphorylation [GO:0006468 biological_process] (1); protein kinase activity [GO:0004672 molecular_function] (1)                                                                                                                                                                                                                                                                                                                             | Protein kinase-like domain [IPRO11009] (1); Protein kinase domain [IPRO00719] (1)                                                                                                                                                                                                                                                                                                                                                                                                                                                                              | -                               | -                            | P_trifoliata_00412_mRNA_24,1    |
| GF0048608 | 0                            | 0                         | 0                            | 1 Hypothetical protein (1)                                                 |                                                                                                                                                                                                                                                                                                                                                                                                                                                                                                       | Aspartic peptidase domain [IPRO21109] (1)                                                                                                                                                                                                                                                                                                                                                                                                                                                                                                                      | -                               | -                            | P_trifoliata_00412_mRNA_2,1     |
| GF0048607 | 0                            | 0                         | 0                            | 1 Hypothetical protein (1)                                                 |                                                                                                                                                                                                                                                                                                                                                                                                                                                                                                       |                                                                                                                                                                                                                                                                                                                                                                                                                                                                                                                                                                | -                               | -                            | P_trifoliata_00412_mRNA_19,1    |
| GF0048606 | 0                            | 0                         | 0                            | 1 Hypothetical protein (1)                                                 |                                                                                                                                                                                                                                                                                                                                                                                                                                                                                                       |                                                                                                                                                                                                                                                                                                                                                                                                                                                                                                                                                                | -                               | -                            | P_trifoliata_00412_mRNA_17,1    |
| GF0048605 | 0                            | 0                         | 0                            | 1 Hypothetical protein (1)                                                 | protein binding [GO:0005515 molecular_function] (1)                                                                                                                                                                                                                                                                                                                                                                                                                                                   | Ankyrin repeat-containing domain [IPRO20683] (1); Ankyrin repeat [IPRO02110] (1)                                                                                                                                                                                                                                                                                                                                                                                                                                                                               | -                               | -                            | P_trifoliata_00411_mRNA_8,1     |
| GF0048604 | 0                            | 0                         | 0                            | 1 Hypothetical protein (1)                                                 |                                                                                                                                                                                                                                                                                                                                                                                                                                                                                                       | PGG domain [IPRO20961] (1)                                                                                                                                                                                                                                                                                                                                                                                                                                                                                                                                     | -                               | -                            | P_trifoliata_00411_mRNA_5,1     |
| GF0048603 | 0                            | 0                         | 0                            | 1 Hypothetical protein (1)                                                 |                                                                                                                                                                                                                                                                                                                                                                                                                                                                                                       |                                                                                                                                                                                                                                                                                                                                                                                                                                                                                                                                                                | -                               | -                            | P_trifoliata_00411_mRNA_3,1     |
| GF0048602 | 0                            | 0                         | 0                            | 1 Hypothetical protein (1)                                                 | DNA repair [GO:0006281 biological_process] (1); endonuclease activity [GO:0004519 molecular_function] (1); nucleus [GO:0005634 cellular_component] (1); damaged DNA binding [GO:0003684 molecular_function] (1)                                                                                                                                                                                                                                                                                       | ERCC1/RAD10/SWT10 family [IPRO04579] (1); Restriction endonuclease type II-like [IPRO11335] (1)                                                                                                                                                                                                                                                                                                                                                                                                                                                                | -                               | -                            | P_trifoliata_00411_mRNA_25,1    |
| GF0048601 | 0                            | 0                         | 0                            | 1 Hypothetical protein (1)                                                 |                                                                                                                                                                                                                                                                                                                                                                                                                                                                                                       |                                                                                                                                                                                                                                                                                                                                                                                                                                                                                                                                                                | -                               | -                            | P_trifoliata_00411_mRNA_24,1    |
| GF0048600 | 0                            | 0                         | 0                            | 1 Hypothetical protein (1)                                                 |                                                                                                                                                                                                                                                                                                                                                                                                                                                                                                       |                                                                                                                                                                                                                                                                                                                                                                                                                                                                                                                                                                | -                               | -                            | P_trifoliata_00411_mRNA_23,1    |
| GF0048599 | 0                            | 0                         | 0                            | 1 Hypothetical protein (1)                                                 |                                                                                                                                                                                                                                                                                                                                                                                                                                                                                                       |                                                                                                                                                                                                                                                                                                                                                                                                                                                                                                                                                                | -                               | -                            | P_trifoliata_00411_mRNA_21,1    |
| GF0048598 | 0                            | 0                         | 0                            | 1 Ankyrin repeat protein-like (1)                                          | protein binding [GO:0005515 molecular_function] (1)                                                                                                                                                                                                                                                                                                                                                                                                                                                   | Ankyrin repeat-containing domain [IPRO20683] (1); Ankyrin repeat [IPRO02110] (1)                                                                                                                                                                                                                                                                                                                                                                                                                                                                               | -                               | -                            | P_trifoliata_00411_mRNA_2,1     |
| GF0048597 | 0                            | 0                         | 0                            | 1 SWIB complex BAF60b domain-containing protein (1)                        | DNA binding [GO:0003677 molecular_function] (1); protein binding [GO:0005515 molecular_function] (1)                                                                                                                                                                                                                                                                                                                                                                                                  | SWIB/MDM2 domain [IPRO03121] (1); SWIB domain [IPRO19835] (1); DEK, C-terminal [IPRO14876] (1); Homeodomain-like [IPRO09057] (1)                                                                                                                                                                                                                                                                                                                                                                                                                               | -                               | -                            | P_trifoliata_00411_mRNA_17,1    |
| GF0048596 | 0                            | 0                         | 0                            | 1 Hypothetical protein (1)                                                 |                                                                                                                                                                                                                                                                                                                                                                                                                                                                                                       |                                                                                                                                                                                                                                                                                                                                                                                                                                                                                                                                                                | -                               | -                            | P_trifoliata_00411_mRNA_12,1    |
| GF0048595 | 0                            | 0                         | 0                            | 1 Hypothetical protein (1)                                                 |                                                                                                                                                                                                                                                                                                                                                                                                                                                                                                       |                                                                                                                                                                                                                                                                                                                                                                                                                                                                                                                                                                | -                               | -                            | P_trifoliata_00410_mRNA_9,1     |
| GF0048594 | 0                            | 0                         | 0                            | 1 Hypothetical protein (1)                                                 |                                                                                                                                                                                                                                                                                                                                                                                                                                                                                                       |                                                                                                                                                                                                                                                                                                                                                                                                                                                                                                                                                                | -                               | -                            | P_trifoliata_00410_mRNA_7,1     |
| GF0048593 | 0                            | 0                         | 0                            | 1 Hypothetical protein (1)                                                 |                                                                                                                                                                                                                                                                                                                                                                                                                                                                                                       |                                                                                                                                                                                                                                                                                                                                                                                                                                                                                                                                                                | -                               | -                            | P_trifoliata_00410_mRNA_6,1     |
| GF0048592 | 0                            | 0                         | 0                            | 1 Hypothetical protein (1)                                                 |                                                                                                                                                                                                                                                                                                                                                                                                                                                                                                       |                                                                                                                                                                                                                                                                                                                                                                                                                                                                                                                                                                | -                               | -                            | P_trifoliata_00410_mRNA_0,1     |
| GF0048591 | 0                            | 0                         | 0                            | 1 Hypothetical protein (1)                                                 |                                                                                                                                                                                                                                                                                                                                                                                                                                                                                                       |                                                                                                                                                                                                                                                                                                                                                                                                                                                                                                                                                                | -                               | -                            | P_trifoliata_00410_mRNA_34,1    |
| GF0048590 | 0                            | 0                         | 0                            | 1 Hypothetical protein (1)                                                 |                                                                                                                                                                                                                                                                                                                                                                                                                                                                                                       |                                                                                                                                                                                                                                                                                                                                                                                                                                                                                                                                                                | -                               | -                            | P_trifoliata_00410_mRNA_32,1    |
| GF0048589 | 0                            | 0                         | 0                            | 1 Hypothetical protein (1)                                                 |                                                                                                                                                                                                                                                                                                                                                                                                                                                                                                       |                                                                                                                                                                                                                                                                                                                                                                                                                                                                                                                                                                | -                               | -                            | P_trifoliata_00410_mRNA_31,1    |
| GF0048588 | 0                            | 0                         | 0                            | 1 Hypothetical protein (1)                                                 |                                                                                                                                                                                                                                                                                                                                                                                                                                                                                                       |                                                                                                                                                                                                                                                                                                                                                                                                                                                                                                                                                                | -                               | -                            | P_trifoliata_00410_mRNA_30,1    |
| GF0048587 | 0                            | 0                         | 0                            | 1 Hypothetical protein (1)                                                 |                                                                                                                                                                                                                                                                                                                                                                                                                                                                                                       |                                                                                                                                                                                                                                                                                                                                                                                                                                                                                                                                                                | -                               | -                            | P_trifoliata_00410_mRNA_28,1    |
| GF0048586 | 0                            | 0                         | 0                            | 1 Hypothetical protein (1)                                                 |                                                                                                                                                                                                                                                                                                                                                                                                                                                                                                       |                                                                                                                                                                                                                                                                                                                                                                                                                                                                                                                                                                | -                               | -                            | P_trifoliata_00410_mRNA_25,1    |
| GF0048585 | 0                            | 0                         | 0                            | 1 Hypothetical protein (1)                                                 |                                                                                                                                                                                                                                                                                                                                                                                                                                                                                                       |                                                                                                                                                                                                                                                                                                                                                                                                                                                                                                                                                                | -                               | -                            | P_trifoliata_00410_mRNA_24,1    |
| GF0048584 | 0                            | 0                         | 0                            | 1 Hypothetical protein (1)                                                 |                                                                                                                                                                                                                                                                                                                                                                                                                                                                                                       |                                                                                                                                                                                                                                                                                                                                                                                                                                                                                                                                                                | -                               | -                            | P_trifoliata_00410_mRNA_19,1    |
| GF0048583 | 0                            | 0                         | 0                            | 1 Hypothetical protein (1)                                                 |                                                                                                                                                                                                                                                                                                                                                                                                                                                                                                       |                                                                                                                                                                                                                                                                                                                                                                                                                                                                                                                                                                | -                               | -                            | P_trifoliata_00410_mRNA_17,1    |
| GF0048582 | 0                            | 0                         | 0                            | 1 Hypothetical protein (1)                                                 |                                                                                                                                                                                                                                                                                                                                                                                                                                                                                                       |                                                                                                                                                                                                                                                                                                                                                                                                                                                                                                                                                                | -                               | -                            | P_trifoliata_00410_mRNA_16,1    |
| GF0048581 | 0                            | 0                         | 0                            | 1 Hypothetical protein (1)                                                 |                                                                                                                                                                                                                                                                                                                                                                                                                                                                                                       |                                                                                                                                                                                                                                                                                                                                                                                                                                                                                                                                                                | -                               | -                            | P_trifoliata_00410_mRNA_11,1    |
| GF0048580 | 0                            | 0                         | 0                            | 1 Hypothetical protein (1)                                                 |                                                                                                                                                                                                                                                                                                                                                                                                                                                                                                       |                                                                                                                                                                                                                                                                                                                                                                                                                                                                                                                                                                | -                               | -                            | P_trifoliata_00410_mRNA_10,1    |
| GF0048579 | 0                            | 0                         | 0                            | 1 Hypothetical protein (1)                                                 |                                                                                                                                                                                                                                                                                                                                                                                                                                                                                                       | Domain of unknown function DUF4216 [IPRO25312] (1)                                                                                                                                                                                                                                                                                                                                                                                                                                                                                                             | -                               | -                            | P_trifoliata_00409_mRNA_1,1     |
| GF0048578 | 0                            | 0                         | 0                            | 1 Hypothetical protein (1)                                                 |                                                                                                                                                                                                                                                                                                                                                                                                                                                                                                       |                                                                                                                                                                                                                                                                                                                                                                                                                                                                                                                                                                | -                               | -                            | P_trifoliata_00409_mRNA_9,1     |
| GF0048577 | 0                            | 0                         | 0                            | 1 Hypothetical protein (1)                                                 | proteolysis [GO:0006508 biological_process] (1); cysteine-type peptidase activity [GO:0008234 molecular_function] (1)                                                                                                                                                                                                                                                                                                                                                                                 | Ulp1 protease family, C-terminal catalytic domain [IPRO03653] (1)                                                                                                                                                                                                                                                                                                                                                                                                                                                                                              | -                               | -                            | P_trifoliata_00409_mRNA_8,1     |
| GF0048576 | 0                            | 0                         | 0                            | 1 Hypothetical protein (1)                                                 |                                                                                                                                                                                                                                                                                                                                                                                                                                                                                                       | Reverse transcriptase, RNA-dependent DNA polymerase [IPRO13103] (1)                                                                                                                                                                                                                                                                                                                                                                                                                                                                                            | -                               | -                            | P_trifoliata_00409_mRNA_6,1     |
| GF0048575 | 0                            | 0                         | 0                            | 1 Hypothetical protein (1)                                                 |                                                                                                                                                                                                                                                                                                                                                                                                                                                                                                       |                                                                                                                                                                                                                                                                                                                                                                                                                                                                                                                                                                | -                               | -                            | P_trifoliata_00409_mRNA_5,1     |
| GF0048574 | 0                            | 0                         | 0                            | 1 Hypothetical protein (1)                                                 |                                                                                                                                                                                                                                                                                                                                                                                                                                                                                                       |                                                                                                                                                                                                                                                                                                                                                                                                                                                                                                                                                                | -                               | -                            | P_trifoliata_00409_mRNA_4,1     |
| GF0048573 | 0                            | 0                         | 0                            | 1 (-)-germanene D synthase (1)                                             | metabolic process [GO:0008152 biological_process] (1); terpene synthase activity [GO:0010323 molecular_function] (1); lyase activity [GO:0016829 molecular_function] (1); magnesium ion binding [GO:0000287 molecular_function] (1)                                                                                                                                                                                                                                                                   | Terpene synthase, N-terminal domain [IPRO01906] (1); Terpene synthase, metal-binding domain [IPRO05630] (1); Terpenoid cyclase/protein prenyltransferase alpha-alpha toroid [IPRO08930] (1); Isoprenoid synthase domain [IPRO08949] (1)                                                                                                                                                                                                                                                                                                                        | -                               | -                            | P_trifoliata_00409_mRNA_20,1    |
| GF0048572 | 0                            | 0                         | 0                            | 1 Hypothetical protein (1)                                                 |                                                                                                                                                                                                                                                                                                                                                                                                                                                                                                       |                                                                                                                                                                                                                                                                                                                                                                                                                                                                                                                                                                | -                               | -                            | P_trifoliata_00409_mRNA_19,1    |
| GF0048571 | 0                            | 0                         | 0                            | 1 Hypothetical protein (1)                                                 |                                                                                                                                                                                                                                                                                                                                                                                                                                                                                                       |                                                                                                                                                                                                                                                                                                                                                                                                                                                                                                                                                                | -                               | -                            | P_trifoliata_00409_mRNA_16,1    |
| GF0048570 | 0                            | 0                         | 0                            | 1 Hypothetical protein (1)                                                 |                                                                                                                                                                                                                                                                                                                                                                                                                                                                                                       |                                                                                                                                                                                                                                                                                                                                                                                                                                                                                                                                                                | -                               | -                            | P_trifoliata_00409_mRNA_12,1    |
| GF0048569 | 0                            | 0                         | 0                            | 1 Hypothetical protein (1)                                                 |                                                                                                                                                                                                                                                                                                                                                                                                                                                                                                       |                                                                                                                                                                                                                                                                                                                                                                                                                                                                                                                                                                | -                               | -                            | P_trifoliata_00409_mRNA_11,1    |
| GF0048568 | 0                            | 0                         | 0                            | 1 Hypothetical protein (1)                                                 |                                                                                                                                                                                                                                                                                                                                                                                                                                                                                                       | Domain of unknown function DUF4219 [IPRO25314] (1)                                                                                                                                                                                                                                                                                                                                                                                                                                                                                                             | -                               | -                            | P_trifoliata_00408_mRNA_8,1     |
| GF0048567 | 0                            | 0                         | 0                            | 1 Hypothetical protein (1)                                                 |                                                                                                                                                                                                                                                                                                                                                                                                                                                                                                       |                                                                                                                                                                                                                                                                                                                                                                                                                                                                                                                                                                | -                               | -                            | P_trifoliata_00408_mRNA_7,1     |
| GF0048566 | 0                            | 0                         | 0                            | 1 LRR receptor-like serine/threonine-protein kinase EFR (1)                | protein binding [GO:0005515 molecular_function] (1)                                                                                                                                                                                                                                                                                                                                                                                                                                                   | Leucine-rich repeat domain, L domain-like [IPRO32675] (1); Leucine-rich repeat, typical subtype [IPRO03591] (1); Leucine-rich repeat [IPRO01611] (1); Leucine-rich repeat-containing N-terminal, plant-type [IPRO13210] (1)                                                                                                                                                                                                                                                                                                                                    | -                               | -                            | P_trifoliata_00408_mRNA_2,1     |
| GF0048565 | 0                            | 0                         | 0                            | 1 Hypothetical protein (1)                                                 | cytoplasm [GO:0005737 cellular_component] (1); oxidoreductase activity [GO:0016491 molecular_function] (1); oxidation-reduction process [GO:005114 biological_process] (1); ATP binding [GO:0005524 molecular_function] (1); protein phosphorylation [GO:0006468 biological_process] (1); protein kinase activity [GO:0004672 molecular_function] (1); thoredoxin-disulfide reductase activity [GO:000479 molecular_function] (1); removal of superoxide radicals [GO:0019430 biological_process] (1) | Pyridine nucleotide-disulphide oxidoreductase, class-II [IPRO00103] (1); Pyridine nucleotide-disulphide oxidoreductase, class-II, active site [IPRO08253] (1); Protein kinase-like domain [IPRO11009] (1); Protein kinase domain [IPRO00719] (1); FAD/NAD(P)-binding domain [IPRO23753] (1); Serine/threonine/tyrosine-protein kinase catalytic domain [IPRO1245] (1); Serine/threonine/dual specificity protein kinase, catalytic domain [IPRO02290] (1); Thioredoxin reductase [IPRO05982] (1); Serine/threonine-protein kinase, active site [IPRO08271] (1) | -                               | -                            | P_trifoliata_00408_mRNA_15,1    |
| GF0048564 | 0                            | 0                         | 0                            | 1 Hypothetical protein (1)                                                 |                                                                                                                                                                                                                                                                                                                                                                                                                                                                                                       |                                                                                                                                                                                                                                                                                                                                                                                                                                                                                                                                                                | -                               | -                            | P_trifoliata_00407_mRNA_9,1     |
| GF0048563 | 0                            | 0                         | 0                            | 1 Hypothetical protein (1)                                                 |                                                                                                                                                                                                                                                                                                                                                                                                                                                                                                       |                                                                                                                                                                                                                                                                                                                                                                                                                                                                                                                                                                | -                               | -                            | P_trifoliata_00407_mRNA_6,1     |
| GF0048562 | 0                            | 0                         | 0                            | 1 Hypothetical protein (1)                                                 |                                                                                                                                                                                                                                                                                                                                                                                                                                                                                                       |                                                                                                                                                                                                                                                                                                                                                                                                                                                                                                                                                                | -                               | -                            | P_trifoliata_00407_mRNA_5,1     |
| GF0048561 | 0                            | 0                         | 0                            | 1 Hypothetical protein (1)                                                 |                                                                                                                                                                                                                                                                                                                                                                                                                                                                                                       |                                                                                                                                                                                                                                                                                                                                                                                                                                                                                                                                                                | -                               | -                            | P_trifoliata_00407_mRNA_4,1     |
| GF0048560 | 0                            | 0                         | 0                            | 1 Hypothetical protein (1)                                                 |                                                                                                                                                                                                                                                                                                                                                                                                                                                                                                       |                                                                                                                                                                                                                                                                                                                                                                                                                                                                                                                                                                | -                               | -                            | P_trifoliata_00407_mRNA_20,1    |
| GF0048559 | 0                            | 0                         | 0                            | 1 Hypothetical protein (1)                                                 |                                                                                                                                                                                                                                                                                                                                                                                                                                                                                                       |                                                                                                                                                                                                                                                                                                                                                                                                                                                                                                                                                                | -                               | -                            | P_trifoliata_00407_mRNA_2,1     |
| GF0048558 | 0                            | 0                         | 0                            | 1 Hypothetical protein (1)                                                 |                                                                                                                                                                                                                                                                                                                                                                                                                                                                                                       |                                                                                                                                                                                                                                                                                                                                                                                                                                                                                                                                                                | -                               | -                            | P_trifoliata_00407_mRNA_17,1    |
| GF0048557 | 0                            | 0                         | 0                            | 1 Hypothetical protein (1)                                                 |                                                                                                                                                                                                                                                                                                                                                                                                                                                                                                       |                                                                                                                                                                                                                                                                                                                                                                                                                                                                                                                                                                | -                               | -                            | P_trifoliata_00407_mRNA_14,1    |
| GF0048556 | 0                            | 0                         | 0                            | 1 LRR receptor-like kinase (1)                                             | protein binding [GO:0005515 molecular_function] (1)                                                                                                                                                                                                                                                                                                                                                                                                                                                   | Leucine-rich repeat domain, L domain-like [IPRO32675] (1)                                                                                                                                                                                                                                                                                                                                                                                                                                                                                                      | -                               | -                            | P_trifoliata_00406_mRNA_5,1     |
| GF0048555 | 0                            | 0                         | 0                            | 1 Hypothetical protein (1)                                                 |                                                                                                                                                                                                                                                                                                                                                                                                                                                                                                       | Chloramphenicol acetyltransferase-like domain [IPRO23213] (1)                                                                                                                                                                                                                                                                                                                                                                                                                                                                                                  | -                               | -                            | P_trifoliata_00406_mRNA_29,1    |
| GF0048554 | 0                            | 0                         | 0                            | 1 F-box protein At5g2280 (1)                                               | protein binding [GO:0005515 molecular_function] (1)                                                                                                                                                                                                                                                                                                                                                                                                                                                   | F-box domain [IPRO01810] (1)                                                                                                                                                                                                                                                                                                                                                                                                                                                                                                                                   | -                               | -                            | P_trifoliata_00406_mRNA_22,1    |
| GF0048553 | 0                            | 0                         | 0                            | 1 LRR receptor-like kinase (1)                                             |                                                                                                                                                                                                                                                                                                                                                                                                                                                                                                       | Leucine-rich repeat domain, L domain-like [IPRO32675] (1)                                                                                                                                                                                                                                                                                                                                                                                                                                                                                                      | -                               | -                            | P_trifoliata_00406_mRNA_2,1     |
| GF0048552 | 0                            | 0                         | 0                            | 1 Anthocyanidin 5,3-O-glucosyltransferase (1)                              | transferase activity, transferring hexosyl groups [GO:0016758 molecular_function] (1); metabolic process [GO:0008152 biological_process] (1)                                                                                                                                                                                                                                                                                                                                                          | UDP-glucuronosyl/UDP-glucosyltransferase [IPRO02213] (1)                                                                                                                                                                                                                                                                                                                                                                                                                                                                                                       | -                               | -                            | P_trifoliata_00406_mRNA_16,1    |
| GF0048551 | 0                            | 0                         | 0                            | 1 Anthocyanidin 5,3-O-glucosyltransferase (1)                              | transferase activity, transferring hexosyl groups [GO:0016758 molecular_function] (1); metabolic process [GO:0008152 biological_process] (1)                                                                                                                                                                                                                                                                                                                                                          | UDP-glucuronosyl/UDP-glucosyltransferase [IPRO02213] (1)                                                                                                                                                                                                                                                                                                                                                                                                                                                                                                       | -                               | -                            | P_trifoliata_00406_mRNA_15,1    |
| GF0048550 | 0                            | 0                         | 0                            | 1 Hypothetical protein (1)                                                 |                                                                                                                                                                                                                                                                                                                                                                                                                                                                                                       | Leucine-rich repeat domain, L domain-like [IPRO32675] (1)                                                                                                                                                                                                                                                                                                                                                                                                                                                                                                      | -                               | -                            | P_trifoliata_00406_mRNA_1,1     |
| GF0048549 | 0                            | 0                         | 0                            | 1 Hypothetical protein (1)                                                 |                                                                                                                                                                                                                                                                                                                                                                                                                                                                                                       |                                                                                                                                                                                                                                                                                                                                                                                                                                                                                                                                                                | -                               | -                            | P_trifoliata_00405_mRNA_18,1    |
| GF0048548 | 0                            | 0                         | 0                            | 1 Hypothetical protein (1)                                                 |                                                                                                                                                                                                                                                                                                                                                                                                                                                                                                       |                                                                                                                                                                                                                                                                                                                                                                                                                                                                                                                                                                | -                               | -                            | P_trifoliata_00405_mRNA_17,1    |
| GF0048547 | 0                            | 0                         | 0                            | 1 Hypothetical protein (1)                                                 |                                                                                                                                                                                                                                                                                                                                                                                                                                                                                                       |                                                                                                                                                                                                                                                                                                                                                                                                                                                                                                                                                                | -                               | -                            | P_trifoliata_00403_mRNA_7,1     |
| GF0048546 | 0                            | 0                         | 0                            | 1 Hypothetical protein (1)                                                 |                                                                                                                                                                                                                                                                                                                                                                                                                                                                                                       |                                                                                                                                                                                                                                                                                                                                                                                                                                                                                                                                                                | -                               | -                            | P_trifoliata_00403_mRNA_6,1     |
| GF0048545 | 0                            | 0                         | 0                            | 1 NADH dehydrogenase [ubiquinone] iron-sulfur protein 6, mitochondrial (1) |                                                                                                                                                                                                                                                                                                                                                                                                                                                                                                       | Zinc finger, CHCC-type [IPRO19401] (1)                                                                                                                                                                                                                                                                                                                                                                                                                                                                                                                         | -                               | -                            | P_trifoliata_00403_mRNA_3,1     |
| GF0048544 | 0                            | 0                         | 0                            | 1 Hypothetical protein (1)                                                 |                                                                                                                                                                                                                                                                                                                                                                                                                                                                                                       |                                                                                                                                                                                                                                                                                                                                                                                                                                                                                                                                                                | -                               | -                            | P_trifoliata_00403_mRNA_25,1    |
| GF0048543 | 0                            | 0                         | 0                            | 1 Hypothetical protein (1)                                                 |                                                                                                                                                                                                                                                                                                                                                                                                                                                                                                       |                                                                                                                                                                                                                                                                                                                                                                                                                                                                                                                                                                | -                               | -                            | P_trifoliata_00403_mRNA_24,1    |
| GF0048542 | 0                            | 0                         | 0                            | 1 Hypothetical protein (1)                                                 |                                                                                                                                                                                                                                                                                                                                                                                                                                                                                                       |                                                                                                                                                                                                                                                                                                                                                                                                                                                                                                                                                                | -                               | -                            | P_trifoliata_00403_mRNA_23,1    |
| GF0048541 | 0                            | 0                         | 0                            | 1 Hypothetical protein (1)                                                 |                                                                                                                                                                                                                                                                                                                                                                                                                                                                                                       |                                                                                                                                                                                                                                                                                                                                                                                                                                                                                                                                                                | -                               | -                            | P_trifoliata_00403_mRNA_22,1    |
| GF0048540 | 0                            | 0                         | 0                            | 1 Hypothetical protein (1)                                                 |                                                                                                                                                                                                                                                                                                                                                                                                                                                                                                       |                                                                                                                                                                                                                                                                                                                                                                                                                                                                                                                                                                | -                               | -                            | P_trifoliata_00403_mRNA_21,1    |
| GF0048539 | 0                            | 0                         | 0                            | 1 Hypothetical protein (1)                                                 |                                                                                                                                                                                                                                                                                                                                                                                                                                                                                                       |                                                                                                                                                                                                                                                                                                                                                                                                                                                                                                                                                                | -                               | -                            | P_trifoliata_00403_mRNA_20,1    |

| ID        | Num. in <i>C. clementiae</i> | Num. in <i>C. canthii</i> | Num. in <i>P. trifoliata</i> | Note                                                                            | GO                                                                                                                                                                                                                                                                                                                                                                                        | InterPro                                                                                                                                                                                                                                                                                                                                                                                                                 | Members in <i>C. clementiae</i> | Members in <i>C. canthii</i> | Members in <i>P. trifoliata</i> |
|-----------|------------------------------|---------------------------|------------------------------|---------------------------------------------------------------------------------|-------------------------------------------------------------------------------------------------------------------------------------------------------------------------------------------------------------------------------------------------------------------------------------------------------------------------------------------------------------------------------------------|--------------------------------------------------------------------------------------------------------------------------------------------------------------------------------------------------------------------------------------------------------------------------------------------------------------------------------------------------------------------------------------------------------------------------|---------------------------------|------------------------------|---------------------------------|
| GF0048538 | 0                            | 0                         | 0                            | 1 Hypothetical protein (1)                                                      | ATP binding [GO:000524 molecular_function] (1)                                                                                                                                                                                                                                                                                                                                            | ATPase, AAA-type, core [IPR003959] (1); P-loop containing nucleoside triphosphate hydrolase [IPR027417] (1)                                                                                                                                                                                                                                                                                                              | -                               | -                            | P_trifoliata_00403_mRNA_2,1     |
| GF0048537 | 0                            | 0                         | 0                            | 1 Hypothetical protein (1)                                                      |                                                                                                                                                                                                                                                                                                                                                                                           |                                                                                                                                                                                                                                                                                                                                                                                                                          | -                               | -                            | P_trifoliata_00403_mRNA_19,1    |
| GF0048536 | 0                            | 0                         | 0                            | 1 Non-LTR retrotransposon reverse transcriptase (1)                             |                                                                                                                                                                                                                                                                                                                                                                                           | Reverse transcriptase zinc-binding domain [IPR026960] (1)                                                                                                                                                                                                                                                                                                                                                                | -                               | -                            | P_trifoliata_00403_mRNA_15,1    |
| GF0048535 | 0                            | 0                         | 0                            | 1 Hypothetical protein (1)                                                      |                                                                                                                                                                                                                                                                                                                                                                                           |                                                                                                                                                                                                                                                                                                                                                                                                                          | -                               | -                            | P_trifoliata_00403_mRNA_14,1    |
| GF0048534 | 0                            | 0                         | 0                            | 1 Hypothetical protein (1)                                                      |                                                                                                                                                                                                                                                                                                                                                                                           |                                                                                                                                                                                                                                                                                                                                                                                                                          | -                               | -                            | P_trifoliata_00403_mRNA_13,1    |
| GF0048533 | 0                            | 0                         | 0                            | 1 Hypothetical protein (1)                                                      |                                                                                                                                                                                                                                                                                                                                                                                           |                                                                                                                                                                                                                                                                                                                                                                                                                          | -                               | -                            | P_trifoliata_00403_mRNA_12,1    |
| GF0048532 | 0                            | 0                         | 0                            | 1 Hypothetical protein (1)                                                      |                                                                                                                                                                                                                                                                                                                                                                                           |                                                                                                                                                                                                                                                                                                                                                                                                                          | -                               | -                            | P_trifoliata_00403_mRNA_10,1    |
| GF0048531 | 0                            | 0                         | 0                            | 1 Hypothetical protein (1)                                                      | iron ion binding [GO:0005506 molecular_function] (1); heme binding [GO:0020037 molecular_function] (1); oxidation-reduction process [GO:005114 biological_process] (1); oxidoreductase activity, acting on paired donors, with incorporation or reduction of molecular oxygen [GO:0016705 molecular_function] (1)                                                                         | Cytochrome P450 [IPR001128] (1)                                                                                                                                                                                                                                                                                                                                                                                          | -                               | -                            | P_trifoliata_00402_mRNA_9,1     |
| GF0048530 | 0                            | 0                         | 0                            | 1 Hypothetical protein (1)                                                      | oxidoreductase activity, acting on paired donors, with incorporation or reduction of molecular oxygen [GO:0016705 molecular_function] (1); oxidation-reduction process [GO:005114 biological_process] (1); iron ion binding [GO:0005506 molecular_function] (1); heme binding [GO:0020037 molecular_function] (1)                                                                         | Cytochrome P450 [IPR001128] (1)                                                                                                                                                                                                                                                                                                                                                                                          | -                               | -                            | P_trifoliata_00402_mRNA_5,1     |
| GF0048529 | 0                            | 0                         | 0                            | 1 Hypothetical protein (1)                                                      |                                                                                                                                                                                                                                                                                                                                                                                           | Protein of unknown function DUF594 [IPR007658] (1)                                                                                                                                                                                                                                                                                                                                                                       | -                               | -                            | P_trifoliata_00402_mRNA_27,1    |
| GF0048528 | 0                            | 0                         | 0                            | 1 Hypothetical protein (1)                                                      |                                                                                                                                                                                                                                                                                                                                                                                           |                                                                                                                                                                                                                                                                                                                                                                                                                          | -                               | -                            | P_trifoliata_00402_mRNA_25,1    |
| GF0048527 | 0                            | 0                         | 0                            | 1 Hypothetical protein (1)                                                      |                                                                                                                                                                                                                                                                                                                                                                                           |                                                                                                                                                                                                                                                                                                                                                                                                                          | -                               | -                            | P_trifoliata_00402_mRNA_2,1     |
| GF0048526 | 0                            | 0                         | 0                            | 1 Hypothetical protein (1)                                                      |                                                                                                                                                                                                                                                                                                                                                                                           |                                                                                                                                                                                                                                                                                                                                                                                                                          | -                               | -                            | P_trifoliata_00402_mRNA_10,1    |
| GF0048525 | 0                            | 0                         | 0                            | 1 Hypothetical protein (1)                                                      |                                                                                                                                                                                                                                                                                                                                                                                           |                                                                                                                                                                                                                                                                                                                                                                                                                          | -                               | -                            | P_trifoliata_00402_mRNA_1,1     |
| GF0048524 | 0                            | 0                         | 0                            | 1 L-aldol 2-dehydrogenase (1)                                                   | oxidoreductase activity [GO:0016491 molecular_function] (1); oxidation-reduction process [GO:005114 biological_process] (1); zinc ion binding [GO:0008270 molecular_function] (1)                                                                                                                                                                                                         | NAD(P)-binding domain [IPR016040] (1); GroES-like [IPR011032] (1); Alcohol dehydrogenase superfamily, zinc-type [IPR02085] (1); Alcohol dehydrogenase, N-terminal [IPR013154] (1); Alcohol dehydrogenase, zinc-type, conserved site [IPR002328] (1); Alcohol dehydrogenase, C-terminal [IPR013199] (1)                                                                                                                   | -                               | -                            | P_trifoliata_00401_mRNA_5,1     |
| GF0048523 | 0                            | 0                         | 0                            | 1 Hypothetical protein (1)                                                      | oxidation-reduction process [GO:005114 biological_process] (1); oxidoreductase activity [GO:0016491 molecular_function] (1); zinc ion binding [GO:0008270 molecular_function] (1)                                                                                                                                                                                                         | Alcohol dehydrogenase, zinc-type, conserved site [IPR002328] (1); Alcohol dehydrogenase, N-terminal [IPR013154] (1); Alcohol dehydrogenase superfamily, zinc-type [IPR02085] (1); GroES-like [IPR011032] (1)                                                                                                                                                                                                             | -                               | -                            | P_trifoliata_00401_mRNA_4,1     |
| GF0048522 | 0                            | 0                         | 0                            | 1 Hypothetical protein (1)                                                      |                                                                                                                                                                                                                                                                                                                                                                                           |                                                                                                                                                                                                                                                                                                                                                                                                                          | -                               | -                            | P_trifoliata_00401_mRNA_22,1    |
| GF0048521 | 0                            | 0                         | 0                            | 1 Hypothetical protein (1)                                                      | catalytic activity [GO:0003824 molecular_function] (1)                                                                                                                                                                                                                                                                                                                                    | L-Asparagine-like [IPR008948] (1); Phenylalanine ammonia-lyase, shielding domain [IPR023144] (1); Aromatic amino acid lyase [IPR001106] (1)                                                                                                                                                                                                                                                                              | -                               | -                            | P_trifoliata_00401_mRNA_20,1    |
| GF0048520 | 0                            | 0                         | 0                            | 1 Hypothetical protein (1)                                                      |                                                                                                                                                                                                                                                                                                                                                                                           |                                                                                                                                                                                                                                                                                                                                                                                                                          | -                               | -                            | P_trifoliata_00401_mRNA_2,1     |
| GF0048519 | 0                            | 0                         | 0                            | 1 Hypothetical protein (1)                                                      |                                                                                                                                                                                                                                                                                                                                                                                           |                                                                                                                                                                                                                                                                                                                                                                                                                          | -                               | -                            | P_trifoliata_00401_mRNA_17,1    |
| GF0048518 | 0                            | 0                         | 0                            | 2-oxoglutarate and Fe(II)-dependent oxygenase superfamily protein isoform 1 (1) | iron ion binding [GO:0005506 molecular_function] (1); L-ascorbic acid binding [GO:0031418 molecular_function] (1); oxidation-reduction process [GO:005114 biological_process] (1); oxidoreductase activity [GO:0016491 molecular_function] (1); oxidoreductase activity, acting on paired donors, with incorporation or reduction of molecular oxygen [GO:0016705 molecular_function] (1) | Prolyl 4-hydroxylase, alpha subunit [IPR006620] (1); Oxooglutarate/iron-dependent dioxygenase [IPR005123] (1)                                                                                                                                                                                                                                                                                                            | -                               | -                            | P_trifoliata_00401_mRNA_16,1    |
| GF0048517 | 0                            | 0                         | 0                            | 1 Hypothetical protein (1)                                                      | isoprenoid biosynthetic process [GO:0008299 biological_process] (1); metabolic process [GO:0008152 biological_process] (1); catalytic activity [GO:0003824 molecular_function] (1); hydroxymethylglutaryl-CoA synthase activity [GO:0004422 molecular_function] (1)                                                                                                                       | Hydroxymethylglutaryl-coenzyme A synthase, N-terminal [IPR015238] (1); Transcription factor, TCP [IPR005333] (1); Thiolasin-like [IPR016039] (1); Transcription factor TCP subgroup [IPR017887] (1); Hydroxymethylglutaryl-coenzyme A synthase C-terminal domain [IPR013746] (1); Hydroxymethylglutaryl-coenzyme A synthase, active site [IPR000590] (1); Hydroxymethylglutaryl-CoA synthase, eukaryotic [IPR010122] (1) | -                               | -                            | P_trifoliata_00401_mRNA_14,1    |
| GF0048516 | 0                            | 0                         | 0                            | 1 Hypothetical protein (1)                                                      |                                                                                                                                                                                                                                                                                                                                                                                           |                                                                                                                                                                                                                                                                                                                                                                                                                          | -                               | -                            | P_trifoliata_00401_mRNA_1,1     |
| GF0048515 | 0                            | 0                         | 0                            | 1 Hypothetical protein (1)                                                      |                                                                                                                                                                                                                                                                                                                                                                                           |                                                                                                                                                                                                                                                                                                                                                                                                                          | -                               | -                            | P_trifoliata_00400_mRNA_8,1     |
| GF0048514 | 0                            | 0                         | 0                            | 1 Hypothetical protein (1)                                                      |                                                                                                                                                                                                                                                                                                                                                                                           | Domain of unknown function DUF4219 [IPR025314] (1)                                                                                                                                                                                                                                                                                                                                                                       | -                               | -                            | P_trifoliata_00400_mRNA_7,1     |
| GF0048513 | 0                            | 0                         | 0                            | 1 Hypothetical protein (1)                                                      |                                                                                                                                                                                                                                                                                                                                                                                           |                                                                                                                                                                                                                                                                                                                                                                                                                          | -                               | -                            | P_trifoliata_00400_mRNA_3,1     |
| GF0048512 | 0                            | 0                         | 0                            | 1 Hypothetical protein (1)                                                      |                                                                                                                                                                                                                                                                                                                                                                                           |                                                                                                                                                                                                                                                                                                                                                                                                                          | -                               | -                            | P_trifoliata_00400_mRNA_11,1    |
| GF0048511 | 0                            | 0                         | 0                            | 1 Hypothetical protein (1)                                                      |                                                                                                                                                                                                                                                                                                                                                                                           |                                                                                                                                                                                                                                                                                                                                                                                                                          | -                               | -                            | P_trifoliata_00399_mRNA_9,1     |
| GF0048510 | 0                            | 0                         | 0                            | 1 Hypothetical protein (1)                                                      |                                                                                                                                                                                                                                                                                                                                                                                           |                                                                                                                                                                                                                                                                                                                                                                                                                          | -                               | -                            | P_trifoliata_00399_mRNA_8,1     |
| GF0048509 | 0                            | 0                         | 0                            | 1 Hypothetical protein (1)                                                      |                                                                                                                                                                                                                                                                                                                                                                                           |                                                                                                                                                                                                                                                                                                                                                                                                                          | -                               | -                            | P_trifoliata_00399_mRNA_6,1     |
| GF0048508 | 0                            | 0                         | 0                            | 1 Hypothetical protein (1)                                                      |                                                                                                                                                                                                                                                                                                                                                                                           |                                                                                                                                                                                                                                                                                                                                                                                                                          | -                               | -                            | P_trifoliata_00399_mRNA_5,1     |
| GF0048507 | 0                            | 0                         | 0                            | 1 Hypothetical protein (1)                                                      |                                                                                                                                                                                                                                                                                                                                                                                           |                                                                                                                                                                                                                                                                                                                                                                                                                          | -                               | -                            | P_trifoliata_00399_mRNA_4,1     |
| GF0048506 | 0                            | 0                         | 0                            | 1 Hypothetical protein (1)                                                      |                                                                                                                                                                                                                                                                                                                                                                                           |                                                                                                                                                                                                                                                                                                                                                                                                                          | -                               | -                            | P_trifoliata_00399_mRNA_30,1    |
| GF0048505 | 0                            | 0                         | 0                            | 1 Hypothetical protein (1)                                                      |                                                                                                                                                                                                                                                                                                                                                                                           |                                                                                                                                                                                                                                                                                                                                                                                                                          | -                               | -                            | P_trifoliata_00399_mRNA_3,1     |
| GF0048504 | 0                            | 0                         | 0                            | 1 Hypothetical protein (1)                                                      |                                                                                                                                                                                                                                                                                                                                                                                           |                                                                                                                                                                                                                                                                                                                                                                                                                          | -                               | -                            | P_trifoliata_00399_mRNA_29,1    |
| GF0048503 | 0                            | 0                         | 0                            | 1 Hypothetical protein (1)                                                      |                                                                                                                                                                                                                                                                                                                                                                                           |                                                                                                                                                                                                                                                                                                                                                                                                                          | -                               | -                            | P_trifoliata_00399_mRNA_28,1    |
| GF0048502 | 0                            | 0                         | 0                            | 1 Hypothetical protein (1)                                                      |                                                                                                                                                                                                                                                                                                                                                                                           |                                                                                                                                                                                                                                                                                                                                                                                                                          | -                               | -                            | P_trifoliata_00399_mRNA_27,1    |
| GF0048501 | 0                            | 0                         | 0                            | 1 Hypothetical protein (1)                                                      |                                                                                                                                                                                                                                                                                                                                                                                           |                                                                                                                                                                                                                                                                                                                                                                                                                          | -                               | -                            | P_trifoliata_00399_mRNA_24,1    |
| GF0048500 | 0                            | 0                         | 0                            | 1 Hypothetical protein (1)                                                      |                                                                                                                                                                                                                                                                                                                                                                                           |                                                                                                                                                                                                                                                                                                                                                                                                                          | -                               | -                            | P_trifoliata_00399_mRNA_23,1    |
| GF0048499 | 0                            | 0                         | 0                            | 1 Hypothetical protein (1)                                                      |                                                                                                                                                                                                                                                                                                                                                                                           |                                                                                                                                                                                                                                                                                                                                                                                                                          | -                               | -                            | P_trifoliata_00399_mRNA_22,1    |
| GF0048498 | 0                            | 0                         | 0                            | 1 Hypothetical protein (1)                                                      |                                                                                                                                                                                                                                                                                                                                                                                           |                                                                                                                                                                                                                                                                                                                                                                                                                          | -                               | -                            | P_trifoliata_00399_mRNA_21,1    |
| GF0048497 | 0                            | 0                         | 0                            | 1 Hypothetical protein (1)                                                      |                                                                                                                                                                                                                                                                                                                                                                                           |                                                                                                                                                                                                                                                                                                                                                                                                                          | -                               | -                            | P_trifoliata_00399_mRNA_20,1    |
| GF0048496 | 0                            | 0                         | 0                            | 1 Cysteine-rich RLK (Receptor-like kinase) protein (1)                          |                                                                                                                                                                                                                                                                                                                                                                                           | Gak2 homologous domain [IPR002902] (1)                                                                                                                                                                                                                                                                                                                                                                                   | -                               | -                            | P_trifoliata_00399_mRNA_2,1     |
| GF0048495 | 0                            | 0                         | 0                            | 1 Hypothetical protein (1)                                                      | nucleic acid binding [GO:0003676 molecular_function] (1); proteolysis [GO:0006508 biological_process] (1); zinc ion binding [GO:0008270 molecular_function] (1); aspartic-type endopeptidase activity [GO:0004190 molecular_function] (1)                                                                                                                                                 | Zinc finger, CCHC-type [IPR001878] (1); Peptidase A2A, retrovirus, catalytic [IPR001995] (1)                                                                                                                                                                                                                                                                                                                             | -                               | -                            | P_trifoliata_00399_mRNA_19,1    |
| GF0048494 | 0                            | 0                         | 0                            | 1 Hypothetical protein (1)                                                      |                                                                                                                                                                                                                                                                                                                                                                                           |                                                                                                                                                                                                                                                                                                                                                                                                                          | -                               | -                            | P_trifoliata_00399_mRNA_17,1    |
| GF0048493 | 0                            | 0                         | 0                            | 1 Hypothetical protein (1)                                                      |                                                                                                                                                                                                                                                                                                                                                                                           |                                                                                                                                                                                                                                                                                                                                                                                                                          | -                               | -                            | P_trifoliata_00399_mRNA_10,1    |
| GF0048492 | 0                            | 0                         | 0                            | 1 Hypothetical protein (1)                                                      |                                                                                                                                                                                                                                                                                                                                                                                           |                                                                                                                                                                                                                                                                                                                                                                                                                          | -                               | -                            | P_trifoliata_00398_mRNA_8,1     |
| GF0048491 | 0                            | 0                         | 0                            | 1 Hypothetical protein (1)                                                      | signal transduction [GO:0007165 biological_process] (1); protein binding [GO:0005515 molecular_function] (1)                                                                                                                                                                                                                                                                              | Toll/interleukin-1 receptor homology (TIR) domain [IPR000157] (1)                                                                                                                                                                                                                                                                                                                                                        | -                               | -                            | P_trifoliata_00398_mRNA_6,1     |
| GF0048490 | 0                            | 0                         | 0                            | 1 AT1G10290 protein (1)                                                         | GTP binding [GO:0005225 molecular_function] (1); GTPase activity [GO:0003924 molecular_function] (1)                                                                                                                                                                                                                                                                                      | Dynamin GTPase effector [IPR003130] (1); Dynamin superfamily [IPR022812] (1); PI1 domain-like [IPR011993] (1); GTPase effector domain [IPR020850] (1); Pleckstrin homology domain [IPR001849] (1)                                                                                                                                                                                                                        | -                               | -                            | P_trifoliata_00398_mRNA_5,1     |
| GF0048489 | 0                            | 0                         | 0                            | 1 Hypothetical protein (1)                                                      |                                                                                                                                                                                                                                                                                                                                                                                           | Retronanposon gap domain [IPR005162] (1)                                                                                                                                                                                                                                                                                                                                                                                 | -                               | -                            | P_trifoliata_00398_mRNA_19,1    |
| GF0048488 | 0                            | 0                         | 0                            | 1 Hypothetical protein (1)                                                      |                                                                                                                                                                                                                                                                                                                                                                                           |                                                                                                                                                                                                                                                                                                                                                                                                                          | -                               | -                            | P_trifoliata_00398_mRNA_16,1    |
| GF0048487 | 0                            | 0                         | 0                            | 1 Small chain of ribonucleotide reductase (1)                                   | deoxyribonucleoside diphosphate metabolic process [GO:0009186 biological_process] (1); oxidation-reduction process [GO:005114 biological_process] (1); oxidoreductase activity [GO:0016491 molecular_function] (1)                                                                                                                                                                        | Ribonucleotide reductase small subunit [IPR000358] (1); Ferritin-like superfamily [IPR009078] (1); Ribonucleotide reductase-related [IPR012448] (1)                                                                                                                                                                                                                                                                      | -                               | -                            | P_trifoliata_00398_mRNA_13,1    |
| GF0048486 | 0                            | 0                         | 0                            | 1 Hypothetical protein (1)                                                      |                                                                                                                                                                                                                                                                                                                                                                                           |                                                                                                                                                                                                                                                                                                                                                                                                                          | -                               | -                            | P_trifoliata_00398_mRNA_10,1    |
| GF0048485 | 0                            | 0                         | 0                            | 1 Hypothetical protein (1)                                                      |                                                                                                                                                                                                                                                                                                                                                                                           |                                                                                                                                                                                                                                                                                                                                                                                                                          | -                               | -                            | P_trifoliata_00398_mRNA_1,1     |
| GF0048484 | 0                            | 0                         | 0                            | 1 Hypothetical protein (1)                                                      | cysteine-type peptidase activity [GO:0008234 molecular_function] (1); proteolysis [GO:0006508 biological_process] (1)                                                                                                                                                                                                                                                                     | Ulp1 protease family, C-terminal catalytic domain [IPR003653] (1)                                                                                                                                                                                                                                                                                                                                                        | -                               | -                            | P_trifoliata_00397_mRNA_7,1     |
| GF0048483 | 0                            | 0                         | 0                            | 1 Hypothetical protein (1)                                                      |                                                                                                                                                                                                                                                                                                                                                                                           |                                                                                                                                                                                                                                                                                                                                                                                                                          | -                               | -                            | P_trifoliata_00397_mRNA_25,1    |
| GF0048482 | 0                            | 0                         | 0                            | 1 Hypothetical protein (1)                                                      |                                                                                                                                                                                                                                                                                                                                                                                           | Cell division protein Fuz2, C-terminal [IPR024757] (1); Tubulin Fuz2, 2-layer sandwich domain [IPR018316] (1); Tubulin/Fuz2, C-terminal [IPR008280] (1)                                                                                                                                                                                                                                                                  | -                               | -                            | P_trifoliata_00397_mRNA_21,1    |
| GF0048481 | 0                            | 0                         | 0                            | 1 Hypothetical protein (1)                                                      |                                                                                                                                                                                                                                                                                                                                                                                           |                                                                                                                                                                                                                                                                                                                                                                                                                          | -                               | -                            | P_trifoliata_00397_mRNA_2,1     |

| ID        | Num. in <i>C. clementiae</i> | Num. in <i>C. canthii</i> | Num. in <i>P. trifoliata</i> | Note                                                                  | GO                                                                                                                                                                                                                                                                                                                | InterPro                                                                                                                                                                                                                  | Members in <i>C. clementiae</i> | Members in <i>C. canthii</i> | Members in <i>P. trifoliata</i> |
|-----------|------------------------------|---------------------------|------------------------------|-----------------------------------------------------------------------|-------------------------------------------------------------------------------------------------------------------------------------------------------------------------------------------------------------------------------------------------------------------------------------------------------------------|---------------------------------------------------------------------------------------------------------------------------------------------------------------------------------------------------------------------------|---------------------------------|------------------------------|---------------------------------|
| GF0048480 | 0                            | 0                         | 1                            | NAC domain protein (1)                                                | DNA binding [GO:0003677 molecular_function] (1); regulation of transcription, DNA-templated [GO:0006355 biological_process] (1)                                                                                                                                                                                   | NAC domain [IPR003441] (1)                                                                                                                                                                                                | -                               | -                            | P_trifoliata_00397_miRNA_18.1   |
| GF0048479 | 0                            | 0                         | 1                            | Hypothetical protein (1)                                              |                                                                                                                                                                                                                                                                                                                   | Transposase, MuDR, plant [IPR004332] (1)                                                                                                                                                                                  | -                               | -                            | P_trifoliata_00397_miRNA_15.1   |
| GF0048478 | 0                            | 0                         | 1                            | Hypothetical protein (1)                                              |                                                                                                                                                                                                                                                                                                                   |                                                                                                                                                                                                                           | -                               | -                            | P_trifoliata_00397_miRNA_1.1    |
| GF0048477 | 0                            | 0                         | 1                            | Hypothetical protein (1)                                              |                                                                                                                                                                                                                                                                                                                   |                                                                                                                                                                                                                           | -                               | -                            | P_trifoliata_00396_miRNA_6.1    |
| GF0048476 | 0                            | 0                         | 1                            | Hypothetical protein (1)                                              | hydrolase activity [GO:0016787 molecular_function] (1)                                                                                                                                                                                                                                                            | Peptidase T2, asparaginase 2 [IPR00246] (1); Nucleophile aminoalcoholase, N-terminal [IPR02905] (1)                                                                                                                       | -                               | -                            | P_trifoliata_00396_miRNA_3.1    |
| GF0048475 | 0                            | 0                         | 1                            | Hypothetical protein (1)                                              |                                                                                                                                                                                                                                                                                                                   |                                                                                                                                                                                                                           | -                               | -                            | P_trifoliata_00396_miRNA_17.1   |
| GF0048474 | 0                            | 0                         | 1                            | Hypothetical protein (1)                                              |                                                                                                                                                                                                                                                                                                                   |                                                                                                                                                                                                                           | -                               | -                            | P_trifoliata_00396_miRNA_16.1   |
| GF0048473 | 0                            | 0                         | 1                            | Hypothetical protein (1)                                              | ATP binding [GO:0005524 molecular_function] (1); catalytic activity [GO:0003524 molecular_function] (1)                                                                                                                                                                                                           | ATP-grasp fold, ATP-dependent carboxylate-amine ligase-type [IPR001135] (1); ATP-grasp fold, subdomain 1 [IPR013815] (1)                                                                                                  | -                               | -                            | P_trifoliata_00396_miRNA_15.1   |
| GF0048472 | 0                            | 0                         | 1                            | Hypothetical protein (1)                                              |                                                                                                                                                                                                                                                                                                                   |                                                                                                                                                                                                                           | -                               | -                            | P_trifoliata_00396_miRNA_11.1   |
| GF0048471 | 0                            | 0                         | 1                            | Hypothetical protein (1)                                              |                                                                                                                                                                                                                                                                                                                   |                                                                                                                                                                                                                           | -                               | -                            | P_trifoliata_00395_miRNA_9.1    |
| GF0048470 | 0                            | 0                         | 1                            | Hypothetical protein (1)                                              |                                                                                                                                                                                                                                                                                                                   |                                                                                                                                                                                                                           | -                               | -                            | P_trifoliata_00395_miRNA_7.1    |
| GF0048469 | 0                            | 0                         | 1                            | Hypothetical protein (1)                                              |                                                                                                                                                                                                                                                                                                                   |                                                                                                                                                                                                                           | -                               | -                            | P_trifoliata_00395_miRNA_5.1    |
| GF0048468 | 0                            | 0                         | 1                            | Hypothetical protein (1)                                              |                                                                                                                                                                                                                                                                                                                   |                                                                                                                                                                                                                           | -                               | -                            | P_trifoliata_00395_miRNA_3.1    |
| GF0048467 | 0                            | 0                         | 1                            | Hypothetical protein (1)                                              |                                                                                                                                                                                                                                                                                                                   |                                                                                                                                                                                                                           | -                               | -                            | P_trifoliata_00395_miRNA_29.1   |
| GF0048466 | 0                            | 0                         | 1                            | Hypothetical protein (1)                                              |                                                                                                                                                                                                                                                                                                                   |                                                                                                                                                                                                                           | -                               | -                            | P_trifoliata_00395_miRNA_25.1   |
| GF0048465 | 0                            | 0                         | 1                            | Hypothetical protein (1)                                              |                                                                                                                                                                                                                                                                                                                   |                                                                                                                                                                                                                           | -                               | -                            | P_trifoliata_00395_miRNA_23.1   |
| GF0048464 | 0                            | 0                         | 1                            | Hypothetical protein (1)                                              |                                                                                                                                                                                                                                                                                                                   |                                                                                                                                                                                                                           | -                               | -                            | P_trifoliata_00395_miRNA_17.1   |
| GF0048463 | 0                            | 0                         | 1                            | Hypothetical protein (1)                                              |                                                                                                                                                                                                                                                                                                                   |                                                                                                                                                                                                                           | -                               | -                            | P_trifoliata_00395_miRNA_16.1   |
| GF0048462 | 0                            | 0                         | 1                            | Tyrosine-sulfated glycopeptide receptor 1                             | protein binding [GO:0005515 molecular_function] (1)                                                                                                                                                                                                                                                               | Leucine-rich repeat [IPR01611] (1); Leucine-rich repeat domain, L domain-like [IPR02675] (1); Leucine-rich repeat, typical subtype [IPR003591] (1)                                                                        | -                               | -                            | P_trifoliata_00393_miRNA_15.1   |
| GF0048461 | 0                            | 0                         | 1                            | Hypothetical protein (1)                                              |                                                                                                                                                                                                                                                                                                                   |                                                                                                                                                                                                                           | -                               | -                            | P_trifoliata_00393_miRNA_13.1   |
| GF0048460 | 0                            | 0                         | 1                            | Hypothetical protein (1)                                              |                                                                                                                                                                                                                                                                                                                   |                                                                                                                                                                                                                           | -                               | -                            | P_trifoliata_00393_miRNA_1.1    |
| GF0048459 | 0                            | 0                         | 1                            | Hypothetical protein (1)                                              |                                                                                                                                                                                                                                                                                                                   |                                                                                                                                                                                                                           | -                               | -                            | P_trifoliata_00392_miRNA_6.1    |
| GF0048458 | 0                            | 0                         | 1                            | Hypothetical protein (1)                                              |                                                                                                                                                                                                                                                                                                                   |                                                                                                                                                                                                                           | -                               | -                            | P_trifoliata_00392_miRNA_5.1    |
| GF0048457 | 0                            | 0                         | 1                            | Hypothetical protein (1)                                              | methyltransferase activity [GO:0008168 molecular_function] (1)                                                                                                                                                                                                                                                    | SAM dependent carboxyl methyltransferase [IPR005299] (1); S-adenosyl-L-methionine-dependent methyltransferase [IPR029063] (1)                                                                                             | -                               | -                            | P_trifoliata_00392_miRNA_23.1   |
| GF0048456 | 0                            | 0                         | 1                            | S-adenosyl-L-methionine:carboxyl methyltransferase family protein (1) | methyltransferase activity [GO:0008168 molecular_function] (1)                                                                                                                                                                                                                                                    | S-adenosyl-L-methionine-dependent methyltransferase [IPR029063] (1); SAM dependent carboxyl methyltransferase [IPR005299] (1)                                                                                             | -                               | -                            | P_trifoliata_00392_miRNA_21.1   |
| GF0048455 | 0                            | 0                         | 1                            | Hypothetical protein (1)                                              |                                                                                                                                                                                                                                                                                                                   |                                                                                                                                                                                                                           | -                               | -                            | P_trifoliata_00392_miRNA_16.1   |
| GF0048454 | 0                            | 0                         | 1                            | Hypothetical protein (1)                                              |                                                                                                                                                                                                                                                                                                                   |                                                                                                                                                                                                                           | -                               | -                            | P_trifoliata_00392_miRNA_15.1   |
| GF0048453 | 0                            | 0                         | 1                            | Hypothetical protein (1)                                              |                                                                                                                                                                                                                                                                                                                   |                                                                                                                                                                                                                           | -                               | -                            | P_trifoliata_00392_miRNA_13.1   |
| GF0048452 | 0                            | 0                         | 1                            | Hypothetical protein (1)                                              |                                                                                                                                                                                                                                                                                                                   |                                                                                                                                                                                                                           | -                               | -                            | P_trifoliata_00392_miRNA_10.1   |
| GF0048451 | 0                            | 0                         | 1                            | UDP-glucosyltransferase 91C1 (1)                                      | metabolic process [GO:0008152 biological_process] (1); transferase activity, transferring hexosyl groups [GO:0016758 molecular_function] (1)                                                                                                                                                                      | P-loop containing nucleoside triphosphate hydrolase [IPR027417] (1); UDP-glucuronoyl/UDP-glucosyltransferase [IPR002213] (1)                                                                                              | -                               | -                            | P_trifoliata_00392_miRNA_1.1    |
| GF0048450 | 0                            | 0                         | 1                            | Hypothetical protein (1)                                              | transferase activity, transferring hexosyl groups [GO:0016758 molecular_function] (1); metabolic process [GO:0008152 biological_process] (1)                                                                                                                                                                      | UDP-glucuronoyl/UDP-glucosyltransferase [IPR002213] (1)                                                                                                                                                                   | -                               | -                            | P_trifoliata_00391_miRNA_28.1   |
| GF0048449 | 0                            | 0                         | 1                            | Hypothetical protein (1)                                              | iron ion binding [GO:0005506 molecular_function] (1); heme binding [GO:0020037 molecular_function] (1); oxidoreductase activity, acting on paired donors, with incorporation or reduction of molecular oxygen [GO:0016705 molecular_function] (1); oxidation-reduction process [GO:005514 biological_process] (1) | Cytochrome P450, E-class, group 1 [IPR002401] (1); Cytochrome P450 [IPR001128] (1)                                                                                                                                        | -                               | -                            | P_trifoliata_00391_miRNA_17.1   |
| GF0048448 | 0                            | 0                         | 1                            | Cytochrome P450 81D1 (1)                                              | transporter activity [GO:0005215 molecular_function] (1); transport [GO:0006810 biological_process] (1); membrane [GO:0016020 cellular_component] (1)                                                                                                                                                             | NRAMP family [IPR001046] (1)                                                                                                                                                                                              | -                               | -                            | P_trifoliata_00391_miRNA_10.1   |
| GF0048447 | 0                            | 0                         | 1                            | Metal transporter (1)                                                 | metabolic process [GO:0008152 biological_process] (1); transferase activity, transferring hexosyl groups [GO:0016758 molecular_function] (1)                                                                                                                                                                      | UDP-glucuronoyl/UDP-glucosyltransferase [IPR002213] (1)                                                                                                                                                                   | -                               | -                            | P_trifoliata_00391_miRNA_1.1    |
| GF0048446 | 0                            | 0                         | 1                            | Hypothetical protein (1)                                              |                                                                                                                                                                                                                                                                                                                   |                                                                                                                                                                                                                           | -                               | -                            | P_trifoliata_00390_miRNA_8.1    |
| GF0048445 | 0                            | 0                         | 1                            | Hypothetical protein (1)                                              |                                                                                                                                                                                                                                                                                                                   |                                                                                                                                                                                                                           | -                               | -                            | P_trifoliata_00390_miRNA_27.1   |
| GF0048444 | 0                            | 0                         | 1                            | Hypothetical protein (1)                                              |                                                                                                                                                                                                                                                                                                                   |                                                                                                                                                                                                                           | -                               | -                            | P_trifoliata_00390_miRNA_26.1   |
| GF0048443 | 0                            | 0                         | 1                            | Hypothetical protein (1)                                              |                                                                                                                                                                                                                                                                                                                   |                                                                                                                                                                                                                           | -                               | -                            | P_trifoliata_00390_miRNA_18.1   |
| GF0048442 | 0                            | 0                         | 1                            | Hypothetical protein (1)                                              |                                                                                                                                                                                                                                                                                                                   |                                                                                                                                                                                                                           | -                               | -                            | P_trifoliata_00390_miRNA_17.1   |
| GF0048441 | 0                            | 0                         | 1                            | Hypothetical protein (1)                                              |                                                                                                                                                                                                                                                                                                                   |                                                                                                                                                                                                                           | -                               | -                            | P_trifoliata_00390_miRNA_15.1   |
| GF0048440 | 0                            | 0                         | 1                            | Hypothetical protein (1)                                              |                                                                                                                                                                                                                                                                                                                   |                                                                                                                                                                                                                           | -                               | -                            | P_trifoliata_00390_miRNA_13.1   |
| GF0048439 | 0                            | 0                         | 1                            | Hypothetical protein (1)                                              |                                                                                                                                                                                                                                                                                                                   |                                                                                                                                                                                                                           | -                               | -                            | P_trifoliata_00390_miRNA_1.1    |
| GF0048438 | 0                            | 0                         | 1                            | Hypothetical protein (1)                                              | aspartic-type endopeptidase activity [GO:0004190 molecular_function] (1); proteolysis [GO:0006508 biological_process] (1)                                                                                                                                                                                         | Peptidase A2A, retrovirus, catalytic [IPR001995] (1)                                                                                                                                                                      | -                               | -                            | P_trifoliata_00390_miRNA_10.1   |
| GF0048437 | 0                            | 0                         | 1                            | Hypothetical protein (1)                                              |                                                                                                                                                                                                                                                                                                                   |                                                                                                                                                                                                                           | -                               | -                            | P_trifoliata_00389_miRNA_5.1    |
| GF0048436 | 0                            | 0                         | 1                            | Hypothetical protein (1)                                              | zinc ion binding [GO:0008270 molecular_function] (1); oxidation-reduction process [GO:005514 biological_process] (1); oxidoreductase activity [GO:0016491 molecular_function] (1)                                                                                                                                 | NAD(P)-binding domain [IPR016040] (1); GoxE-like [IPR011032] (1); Alcohol dehydrogenase superfamily, zinc-type [IPR002085] (1)                                                                                            | -                               | -                            | P_trifoliata_00389_miRNA_27.1   |
| GF0048435 | 0                            | 0                         | 1                            | Leucine-rich repeat receptor-like protein kinase FXL1 (1)             | protein binding [GO:0005515 molecular_function] (1)                                                                                                                                                                                                                                                               | Leucine-rich repeat domain, L domain-like [IPR032675] (1); Leucine-rich repeat-containing N-terminal, plant-type [IPR013210] (1); Leucine-rich repeat [IPR01611] (1)                                                      | -                               | -                            | P_trifoliata_00389_miRNA_26.1   |
| GF0048434 | 0                            | 0                         | 1                            | Glucan endo-1,3-beta-glucosidase 8 (1)                                | carbohydrate metabolic process [GO:0005975 biological_process] (1); hydrolase activity, hydrolyzing O-glycosyl compounds [GO:0004553 molecular_function] (1)                                                                                                                                                      | Glycoside hydrolase superfamily [IPR017853] (1); Glycoside hydrolase family 17 [IPR000490] (1); Glycoside hydrolase, catalytic domain [IPR013781] (1); X3 domain [IPR012946] (1)                                          | -                               | -                            | P_trifoliata_00389_miRNA_15.1   |
| GF0048433 | 0                            | 0                         | 1                            | Hypothetical protein (1)                                              | nucleic acid binding [GO:0003676 molecular_function] (1); protein dimerization activity [GO:0046983 molecular_function] (1)                                                                                                                                                                                       | HAT, C-terminal dimerisation domain [IPR008906] (1); Ribonuclease H-like domain [IPR012337] (1)                                                                                                                           | -                               | -                            | P_trifoliata_00389_miRNA_1.1    |
| GF0048432 | 0                            | 0                         | 1                            | Hypothetical protein (1)                                              |                                                                                                                                                                                                                                                                                                                   |                                                                                                                                                                                                                           | -                               | -                            | P_trifoliata_00388_miRNA_8.1    |
| GF0048431 | 0                            | 0                         | 1                            | Flowering locus T (1)                                                 |                                                                                                                                                                                                                                                                                                                   | Phosphatidylolethanolamine-binding protein PEBP [IPR008914] (1); Phosphatidylolethanolamine-binding, conserved site [IPR001858] (1)                                                                                       | -                               | -                            | P_trifoliata_00388_miRNA_30.1   |
| GF0048430 | 0                            | 0                         | 1                            | Hypothetical protein (1)                                              |                                                                                                                                                                                                                                                                                                                   |                                                                                                                                                                                                                           | -                               | -                            | P_trifoliata_00388_miRNA_16.1   |
| GF0048429 | 0                            | 0                         | 1                            | Hypothetical protein (1)                                              |                                                                                                                                                                                                                                                                                                                   |                                                                                                                                                                                                                           | -                               | -                            | P_trifoliata_00388_miRNA_12.1   |
| GF0048428 | 0                            | 0                         | 1                            | Hypothetical protein (1)                                              |                                                                                                                                                                                                                                                                                                                   |                                                                                                                                                                                                                           | -                               | -                            | P_trifoliata_00387_miRNA_7.1    |
| GF0048427 | 0                            | 0                         | 1                            | Hypothetical protein (1)                                              |                                                                                                                                                                                                                                                                                                                   |                                                                                                                                                                                                                           | -                               | -                            | P_trifoliata_00387_miRNA_6.1    |
| GF0048426 | 0                            | 0                         | 1                            | Retrotransposon protein, putative, Ty1-copia subclass (1)             | DNA integration [GO:0015074 biological_process] (1); nucleic acid binding [GO:0003676 molecular_function] (1)                                                                                                                                                                                                     | GAG-pre-integrase domain [IPR025724] (1); Integrase, catalytic core [IPR001584] (1); Ribonuclease H-like domain [IPR013371] (1)                                                                                           | -                               | -                            | P_trifoliata_00387_miRNA_22.1   |
| GF0048425 | 0                            | 0                         | 1                            | Hypothetical protein (1)                                              |                                                                                                                                                                                                                                                                                                                   |                                                                                                                                                                                                                           | -                               | -                            | P_trifoliata_00387_miRNA_15.1   |
| GF0048424 | 0                            | 0                         | 1                            | Hypothetical protein (1)                                              | regulation of transcription, DNA-templated [GO:0006355 biological_process] (1); nucleic acid binding [GO:0003676 molecular_function] (1)                                                                                                                                                                          | Carlavirus nucleic acid-binding protein [IPR002568] (1)                                                                                                                                                                   | -                               | -                            | P_trifoliata_00387_miRNA_1.1    |
| GF0048423 | 0                            | 0                         | 1                            | Hypothetical protein (1)                                              |                                                                                                                                                                                                                                                                                                                   |                                                                                                                                                                                                                           | -                               | -                            | P_trifoliata_00386_miRNA_8.1    |
| GF0048422 | 0                            | 0                         | 1                            | Hypothetical protein (1)                                              |                                                                                                                                                                                                                                                                                                                   |                                                                                                                                                                                                                           | -                               | -                            | P_trifoliata_00386_miRNA_6.1    |
| GF0048421 | 0                            | 0                         | 1                            | Ribonucleoside-diphosphate reductase, beta subunit (1)                | oxidation-reduction process [GO:0055114 biological_process] (1); oxidoreductase activity [GO:0016491 molecular_function] (1); deoxyribonucleoside diphosphate metabolic process [GO:0009186 biological_process] (1)                                                                                               | Ribonucleoside reductase small subunit, active site [IPR030475] (1); Ribonucleoside reductase, small subunit [IPR000358] (1); Ferritin-like superfamily [IPR009078] (1); Ribonucleoside reductase-related [IPR012348] (1) | -                               | -                            | P_trifoliata_00386_miRNA_5.1    |
| GF0048420 | 0                            | 0                         | 1                            | Hypothetical protein (1)                                              |                                                                                                                                                                                                                                                                                                                   |                                                                                                                                                                                                                           | -                               | -                            | P_trifoliata_00386_miRNA_3.1    |
| GF0048419 | 0                            | 0                         | 1                            | Hypothetical protein (1)                                              |                                                                                                                                                                                                                                                                                                                   |                                                                                                                                                                                                                           | -                               | -                            | P_trifoliata_00386_miRNA_21.1   |
| GF0048418 | 0                            | 0                         | 1                            | Hypothetical protein (1)                                              |                                                                                                                                                                                                                                                                                                                   |                                                                                                                                                                                                                           | -                               | -                            | P_trifoliata_00386_miRNA_12.1   |
| GF0048417 | 0                            | 0                         | 1                            | Hypothetical protein (1)                                              |                                                                                                                                                                                                                                                                                                                   |                                                                                                                                                                                                                           | -                               | -                            | P_trifoliata_00386_miRNA_11.1   |
| GF0048416 | 0                            | 0                         | 1                            | Hypothetical protein (1)                                              |                                                                                                                                                                                                                                                                                                                   |                                                                                                                                                                                                                           | -                               | -                            | P_trifoliata_00386_miRNA_1.1    |
| GF0048415 | 0                            | 0                         | 1                            | Hypothetical protein (1)                                              |                                                                                                                                                                                                                                                                                                                   | Retroransposon gag domain [IPR005162] (1)                                                                                                                                                                                 | -                               | -                            | P_trifoliata_00385_miRNA_7.1    |

| ID        | Num. in <i>C. clementiae</i> | Num. in <i>C. canihii</i> | Num. in <i>P. trifoliata</i> | Note                                                         | GO                                                                                                                                                                                                                                                                                                                                                                                                        | InterPro                                                                                                                                                                                                                                              | Members in <i>C. clementiae</i> | Members in <i>C. canihii</i> | Members in <i>P. trifoliata</i> |
|-----------|------------------------------|---------------------------|------------------------------|--------------------------------------------------------------|-----------------------------------------------------------------------------------------------------------------------------------------------------------------------------------------------------------------------------------------------------------------------------------------------------------------------------------------------------------------------------------------------------------|-------------------------------------------------------------------------------------------------------------------------------------------------------------------------------------------------------------------------------------------------------|---------------------------------|------------------------------|---------------------------------|
| GF0048414 | 0                            | 0                         | 1                            | Hypothetical protein (1)                                     | oxygen-reducing activity, acting on single donors with incorporation of molecular oxygen, incorporation of two atoms of oxygen [GO:0016702 molecular_function] (1); oxidation-reduction process [GO:0055114 biological_process] (1); metal ion binding [GO:0046772 molecular_function] (1)                                                                                                                | Lipoxygenase [IPR000907] (1); Lipoxygenase, C-terminal [IPR013819] (1)                                                                                                                                                                                | -                               | -                            | P_trifoliata_00385_mRNA_5.1     |
| GF0048413 | 0                            | 0                         | 1                            | Hypothetical protein (1)                                     | -                                                                                                                                                                                                                                                                                                                                                                                                         | -                                                                                                                                                                                                                                                     | -                               | -                            | P_trifoliata_00385_mRNA_26.1    |
| GF0048412 | 0                            | 0                         | 1                            | Hypothetical protein (1)                                     | -                                                                                                                                                                                                                                                                                                                                                                                                         | -                                                                                                                                                                                                                                                     | -                               | -                            | P_trifoliata_00385_mRNA_22.1    |
| GF0048411 | 0                            | 0                         | 1                            | Hypothetical protein (1)                                     | metal ion binding [GO:0046772 molecular_function] (1); oxidoreductase activity, acting on single donors with incorporation of molecular oxygen, incorporation of two atoms of oxygen [GO:0016702 molecular_function] (1); oxidation-reduction process [GO:0055114 biological_process] (1)                                                                                                                 | Lipoxygenase, C-terminal [IPR013819] (1); Lipoxygenase [IPR000907] (1)                                                                                                                                                                                | -                               | -                            | P_trifoliata_00385_mRNA_2.1     |
| GF0048410 | 0                            | 0                         | 1                            | Hypothetical protein (1)                                     | -                                                                                                                                                                                                                                                                                                                                                                                                         | -                                                                                                                                                                                                                                                     | -                               | -                            | P_trifoliata_00385_mRNA_19.1    |
| GF0048409 | 0                            | 0                         | 1                            | Oxidoreductase family, NAD-binding Rossmann fold protein (1) | oxidation-reduction process [GO:0055114 biological_process] (1); oxidoreductase activity [GO:0016491 molecular_function] (1); metabolic process [GO:0008152 biological_process] (1)                                                                                                                                                                                                                       | Oxidoreductase, N-terminal [IPR000683] (1); Oxidoreductase, C-terminal [IPR01404] (1); NAD(P)-binding domain [IPR016040] (1)                                                                                                                          | -                               | -                            | P_trifoliata_00385_mRNA_14.1    |
| GF0048408 | 0                            | 0                         | 1                            | Hypothetical protein (1)                                     | -                                                                                                                                                                                                                                                                                                                                                                                                         | -                                                                                                                                                                                                                                                     | -                               | -                            | P_trifoliata_00385_mRNA_13.1    |
| GF0048407 | 0                            | 0                         | 1                            | Hypothetical protein (1)                                     | -                                                                                                                                                                                                                                                                                                                                                                                                         | -                                                                                                                                                                                                                                                     | -                               | -                            | P_trifoliata_00385_mRNA_11.1    |
| GF0048406 | 0                            | 0                         | 1                            | Hypothetical protein (1)                                     | oxidation-reduction process [GO:0055114 biological_process] (1); oxidoreductase activity, acting on single donors with incorporation of molecular oxygen, incorporation of two atoms of oxygen [GO:0016702 molecular_function] (1); metal ion binding [GO:0046772 molecular_function] (1); protein binding [GO:0005515 molecular_function] (1)                                                            | PLAT/LHD domain [IPR001024] (1); Lipoxygenase [IPR000907] (1)                                                                                                                                                                                         | -                               | -                            | P_trifoliata_00385_mRNA_10.1    |
| GF0048405 | 0                            | 0                         | 1                            | Outer envelope protein of 80 kDa (1)                         | oxidation-reduction process [GO:0055114 biological_process] (1); oxidoreductase activity [GO:0016491 molecular_function] (1); metabolic process [GO:0008152 biological_process] (1)                                                                                                                                                                                                                       | Bacterial surface antigen (D15) [IPR00184] (1)                                                                                                                                                                                                        | -                               | -                            | P_trifoliata_00384_mRNA_6.1     |
| GF0048404 | 0                            | 0                         | 1                            | Hypothetical protein (1)                                     | -                                                                                                                                                                                                                                                                                                                                                                                                         | K homology domain-like, alpha/beta [IPR015946] (1); GTPase Dcr, C-terminal KH-domain-like [IPR023859] (1)                                                                                                                                             | -                               | -                            | P_trifoliata_00384_mRNA_24.1    |
| GF0048403 | 0                            | 0                         | 1                            | Hypothetical protein (1)                                     | oxidation-reduction process [GO:0055114 biological_process] (1); oxidoreductase activity [GO:0016491 molecular_function] (1); metabolic process [GO:0008152 biological_process] (1)                                                                                                                                                                                                                       | Aldehyde dehydrogenase N-terminal domain [IPR016162] (1); Aldehyde-ketone dehydrogenase [IPR016161] (1)                                                                                                                                               | -                               | -                            | P_trifoliata_00384_mRNA_22.1    |
| GF0048402 | 0                            | 0                         | 1                            | Hypothetical protein (1)                                     | -                                                                                                                                                                                                                                                                                                                                                                                                         | -                                                                                                                                                                                                                                                     | -                               | -                            | P_trifoliata_00384_mRNA_2.1     |
| GF0048401 | 0                            | 0                         | 1                            | Hypothetical protein (1)                                     | -                                                                                                                                                                                                                                                                                                                                                                                                         | -                                                                                                                                                                                                                                                     | -                               | -                            | P_trifoliata_00384_mRNA_16.1    |
| GF0048400 | 0                            | 0                         | 1                            | Extensin (1)                                                 | -                                                                                                                                                                                                                                                                                                                                                                                                         | -                                                                                                                                                                                                                                                     | -                               | -                            | P_trifoliata_00384_mRNA_15.1    |
| GF0048399 | 0                            | 0                         | 1                            | Hypothetical protein (1)                                     | -                                                                                                                                                                                                                                                                                                                                                                                                         | Ankyrin repeat-containing domain [IPR020683] (1)                                                                                                                                                                                                      | -                               | -                            | P_trifoliata_00384_mRNA_13.1    |
| GF0048398 | 0                            | 0                         | 1                            | Neurofilament heavy protein, putative (1)                    | -                                                                                                                                                                                                                                                                                                                                                                                                         | -                                                                                                                                                                                                                                                     | -                               | -                            | P_trifoliata_00384_mRNA_12.1    |
| GF0048397 | 0                            | 0                         | 1                            | Neurofilament heavy protein, putative (1)                    | -                                                                                                                                                                                                                                                                                                                                                                                                         | -                                                                                                                                                                                                                                                     | -                               | -                            | P_trifoliata_00384_mRNA_11.1    |
| GF0048396 | 0                            | 0                         | 1                            | Hypothetical protein (1)                                     | -                                                                                                                                                                                                                                                                                                                                                                                                         | -                                                                                                                                                                                                                                                     | -                               | -                            | P_trifoliata_00383_mRNA_25.1    |
| GF0048395 | 0                            | 0                         | 1                            | Hypothetical protein (1)                                     | -                                                                                                                                                                                                                                                                                                                                                                                                         | -                                                                                                                                                                                                                                                     | -                               | -                            | P_trifoliata_00383_mRNA_10.1    |
| GF0048394 | 0                            | 0                         | 1                            | Hypothetical protein (1)                                     | -                                                                                                                                                                                                                                                                                                                                                                                                         | -                                                                                                                                                                                                                                                     | -                               | -                            | P_trifoliata_00382_mRNA_7.1     |
| GF0048393 | 0                            | 0                         | 1                            | Hypothetical protein (1)                                     | -                                                                                                                                                                                                                                                                                                                                                                                                         | -                                                                                                                                                                                                                                                     | -                               | -                            | P_trifoliata_00382_mRNA_6.1     |
| GF0048392 | 0                            | 0                         | 1                            | Hypothetical protein (1)                                     | -                                                                                                                                                                                                                                                                                                                                                                                                         | -                                                                                                                                                                                                                                                     | -                               | -                            | P_trifoliata_00382_mRNA_4.1     |
| GF0048391 | 0                            | 0                         | 1                            | Hypothetical protein (1)                                     | -                                                                                                                                                                                                                                                                                                                                                                                                         | Retransposon gag domain [IPR005162] (1)                                                                                                                                                                                                               | -                               | -                            | P_trifoliata_00382_mRNA_27.1    |
| GF0048390 | 0                            | 0                         | 1                            | Hypothetical protein (1)                                     | -                                                                                                                                                                                                                                                                                                                                                                                                         | -                                                                                                                                                                                                                                                     | -                               | -                            | P_trifoliata_00382_mRNA_24.1    |
| GF0048389 | 0                            | 0                         | 1                            | Hypothetical protein (1)                                     | -                                                                                                                                                                                                                                                                                                                                                                                                         | Reverse transcriptase domain [IPR004077] (1)                                                                                                                                                                                                          | -                               | -                            | P_trifoliata_00382_mRNA_23.1    |
| GF0048388 | 0                            | 0                         | 1                            | Hypothetical protein (1)                                     | -                                                                                                                                                                                                                                                                                                                                                                                                         | -                                                                                                                                                                                                                                                     | -                               | -                            | P_trifoliata_00382_mRNA_21.1    |
| GF0048387 | 0                            | 0                         | 1                            | Hypothetical protein (1)                                     | nucleic acid binding [GO:0003676 molecular_function] (1)                                                                                                                                                                                                                                                                                                                                                  | Ribonuclease H-like domain [IPR012337] (1)                                                                                                                                                                                                            | -                               | -                            | P_trifoliata_00382_mRNA_20.1    |
| GF0048386 | 0                            | 0                         | 1                            | Hypothetical protein (1)                                     | -                                                                                                                                                                                                                                                                                                                                                                                                         | -                                                                                                                                                                                                                                                     | -                               | -                            | P_trifoliata_00382_mRNA_16.1    |
| GF0048385 | 0                            | 0                         | 1                            | Cytokinin riboside 5'-monophosphate phosphoribohydrolase (1) | -                                                                                                                                                                                                                                                                                                                                                                                                         | LOG family [IPR031100] (1)                                                                                                                                                                                                                            | -                               | -                            | P_trifoliata_00382_mRNA_15.1    |
| GF0048384 | 0                            | 0                         | 1                            | Glucan endo-1,3-beta-glucosidase 14 (1)                      | carbohydrate metabolic process [GO:0009975 biological_process] (1); hydrolase activity, hydrolyzing O-glycosyl compounds [GO:0004553 molecular_function] (1)                                                                                                                                                                                                                                              | Glycoside hydrolase superfamily [IPR017853] (1); Glycoside hydrolase family 17 [IPR004090] (1); Glycoside hydrolase, catalytic domain [IPR013781] (1)                                                                                                 | -                               | -                            | P_trifoliata_00382_mRNA_13.1    |
| GF0048383 | 0                            | 0                         | 1                            | Hypothetical protein (1)                                     | -                                                                                                                                                                                                                                                                                                                                                                                                         | XR domain [IPR012946] (1)                                                                                                                                                                                                                             | -                               | -                            | P_trifoliata_00382_mRNA_12.1    |
| GF0048382 | 0                            | 0                         | 1                            | Hypothetical protein (1)                                     | -                                                                                                                                                                                                                                                                                                                                                                                                         | -                                                                                                                                                                                                                                                     | -                               | -                            | P_trifoliata_00382_mRNA_1.1     |
| GF0048381 | 0                            | 0                         | 1                            | Hypothetical protein (1)                                     | -                                                                                                                                                                                                                                                                                                                                                                                                         | -                                                                                                                                                                                                                                                     | -                               | -                            | P_trifoliata_00381_mRNA_27.1    |
| GF0048380 | 0                            | 0                         | 1                            | Hypothetical protein (1)                                     | -                                                                                                                                                                                                                                                                                                                                                                                                         | -                                                                                                                                                                                                                                                     | -                               | -                            | P_trifoliata_00381_mRNA_25.1    |
| GF0048379 | 0                            | 0                         | 1                            | Cytokinin riboside 5'-monophosphate phosphoribohydrolase (1) | -                                                                                                                                                                                                                                                                                                                                                                                                         | LOG family [IPR031100] (1)                                                                                                                                                                                                                            | -                               | -                            | P_trifoliata_00381_mRNA_24.1    |
| GF0048378 | 0                            | 0                         | 1                            | Hypothetical protein (1)                                     | -                                                                                                                                                                                                                                                                                                                                                                                                         | -                                                                                                                                                                                                                                                     | -                               | -                            | P_trifoliata_00381_mRNA_21.1    |
| GF0048377 | 0                            | 0                         | 1                            | Hypothetical protein (1)                                     | -                                                                                                                                                                                                                                                                                                                                                                                                         | -                                                                                                                                                                                                                                                     | -                               | -                            | P_trifoliata_00381_mRNA_20.1    |
| GF0048376 | 0                            | 0                         | 1                            | Crossed neck protein / cell cycle protein, putative (1)      | protein binding [GO:0005515 molecular_function] (1); RNA processing [GO:0006396 biological_process] (1)                                                                                                                                                                                                                                                                                                   | Tetrapeptide-like helical domain [IPR011990] (1); HAT (Half-A-TPR) repeat [IPR003107] (1); Tetrapeptide repeat-containing domain [IPR013026] (1)                                                                                                      | -                               | -                            | P_trifoliata_00381_mRNA_16.1    |
| GF0048375 | 0                            | 0                         | 1                            | Hypothetical protein (1)                                     | proteolysis [GO:0006508 biological_process] (1); cysteine-type peptidase activity [GO:0008234 molecular_function] (1)                                                                                                                                                                                                                                                                                     | Ulp1 protease family, C-terminal catalytic domain [IPR003653] (1)                                                                                                                                                                                     | -                               | -                            | P_trifoliata_00380_mRNA_3.1     |
| GF0048374 | 0                            | 0                         | 1                            | Hexose carrier protein HEX6 (1)                              | transmembrane transport [GO:0055085 biological_process] (1); transporter activity [GO:0005215 molecular_function] (1); membrane [GO:0016020 cellular_component] (1); transmembrane transporter activity [GO:002857 molecular_function] (1); integral component of membrane [GO:0016021 cellular_component] (1); substrate-specific transmembrane transporter activity [GO:0022891 molecular_function] (1) | Sugar transporter, conserved site [IPR005829] (1); Major facilitator superfamily domain [IPR020846] (1); Major facilitator, sugar transporter-like [IPR005828] (1); Sugar/inositol transporter [IPR003663] (1)                                        | -                               | -                            | P_trifoliata_00380_mRNA_24.1    |
| GF0048373 | 0                            | 0                         | 1                            | Hypothetical protein (1)                                     | -                                                                                                                                                                                                                                                                                                                                                                                                         | Chromo/chromo shadow domain [IPR009553] (1); Chromo domain-like [IPR016197] (1)                                                                                                                                                                       | -                               | -                            | P_trifoliata_00380_mRNA_17.1    |
| GF0048372 | 0                            | 0                         | 1                            | Hypothetical protein (1)                                     | -                                                                                                                                                                                                                                                                                                                                                                                                         | -                                                                                                                                                                                                                                                     | -                               | -                            | P_trifoliata_00380_mRNA_15.1    |
| GF0048371 | 0                            | 0                         | 1                            | Hypothetical protein (1)                                     | protein binding [GO:0005515 molecular_function] (1)                                                                                                                                                                                                                                                                                                                                                       | Ankyrin repeat-containing domain [IPR020683] (1); Ankyrin repeat [IPR002110] (1)                                                                                                                                                                      | -                               | -                            | P_trifoliata_00380_mRNA_13.1    |
| GF0048370 | 0                            | 0                         | 1                            | Hypothetical protein (1)                                     | -                                                                                                                                                                                                                                                                                                                                                                                                         | -                                                                                                                                                                                                                                                     | -                               | -                            | P_trifoliata_00380_mRNA_10.1    |
| GF0048369 | 0                            | 0                         | 1                            | Hypothetical protein (1)                                     | -                                                                                                                                                                                                                                                                                                                                                                                                         | -                                                                                                                                                                                                                                                     | -                               | -                            | P_trifoliata_00380_mRNA_1.1     |
| GF0048368 | 0                            | 0                         | 1                            | Hypothetical protein (1)                                     | zinc ion binding [GO:0008270 molecular_function] (1); nucleic acid binding [GO:0003676 molecular_function] (1)                                                                                                                                                                                                                                                                                            | Zinc finger, CCHC-type [IPR018178] (1)                                                                                                                                                                                                                | -                               | -                            | P_trifoliata_00379_mRNA_4.1     |
| GF0048367 | 0                            | 0                         | 1                            | Hypothetical protein (1)                                     | -                                                                                                                                                                                                                                                                                                                                                                                                         | -                                                                                                                                                                                                                                                     | -                               | -                            | P_trifoliata_00379_mRNA_22.1    |
| GF0048366 | 0                            | 0                         | 1                            | Hypothetical protein (1)                                     | -                                                                                                                                                                                                                                                                                                                                                                                                         | -                                                                                                                                                                                                                                                     | -                               | -                            | P_trifoliata_00379_mRNA_17.1    |
| GF0048365 | 0                            | 0                         | 1                            | Hypothetical protein (1)                                     | -                                                                                                                                                                                                                                                                                                                                                                                                         | -                                                                                                                                                                                                                                                     | -                               | -                            | P_trifoliata_00379_mRNA_13.1    |
| GF0048364 | 0                            | 0                         | 1                            | Hypothetical protein (1)                                     | -                                                                                                                                                                                                                                                                                                                                                                                                         | -                                                                                                                                                                                                                                                     | -                               | -                            | P_trifoliata_00379_mRNA_12.1    |
| GF0048363 | 0                            | 0                         | 1                            | Hypothetical protein (1)                                     | -                                                                                                                                                                                                                                                                                                                                                                                                         | -                                                                                                                                                                                                                                                     | -                               | -                            | P_trifoliata_00378_mRNA_6.1     |
| GF0048362 | 0                            | 0                         | 1                            | SOUL heme-binding family protein (1)                         | -                                                                                                                                                                                                                                                                                                                                                                                                         | Regulatory factor, effector binding domain [IPR01256] (1); SOUL haem-binding protein [IPR006917] (1); NTF2-like domain [IPR02710] (1); Protein of unknown function DUF2558 [IPR018790] (1)                                                            | -                               | -                            | P_trifoliata_00378_mRNA_4.1     |
| GF0048361 | 0                            | 0                         | 1                            | DEAD box RNA helicase (1)                                    | ATP binding [GO:0005524 molecular_function] (1); nucleic acid binding [GO:0003676 molecular_function] (1)                                                                                                                                                                                                                                                                                                 | P-loop containing nucleoside triphosphate hydrolase [IPR027417] (1); ATP-dependent RNA helicase DEAD-box, conserved site [IPR000629] (1); DEAD/DEAH box helicase domain [IPR013485] (1); Helicase superfamily 1/2, ATP-binding domain [IPR014001] (1) | -                               | -                            | P_trifoliata_00378_mRNA_34.1    |
| GF0048360 | 0                            | 0                         | 1                            | Hypothetical protein (1)                                     | -                                                                                                                                                                                                                                                                                                                                                                                                         | -                                                                                                                                                                                                                                                     | -                               | -                            | P_trifoliata_00378_mRNA_33.1    |
| GF0048359 | 0                            | 0                         | 1                            | Hypothetical protein (1)                                     | -                                                                                                                                                                                                                                                                                                                                                                                                         | Endonuclease/consomease/phosphatase [IPR005135] (1)                                                                                                                                                                                                   | -                               | -                            | P_trifoliata_00378_mRNA_32.1    |
| GF0048358 | 0                            | 0                         | 1                            | Hypothetical protein (1)                                     | -                                                                                                                                                                                                                                                                                                                                                                                                         | -                                                                                                                                                                                                                                                     | -                               | -                            | P_trifoliata_00378_mRNA_30.1    |
| GF0048357 | 0                            | 0                         | 1                            | Hypothetical protein (1)                                     | -                                                                                                                                                                                                                                                                                                                                                                                                         | -                                                                                                                                                                                                                                                     | -                               | -                            | P_trifoliata_00378_mRNA_19.1    |
| GF0048356 | 0                            | 0                         | 1                            | Hypothetical protein (1)                                     | -                                                                                                                                                                                                                                                                                                                                                                                                         | Protein of unknown function DUF2921 [IPR021319] (1)                                                                                                                                                                                                   | -                               | -                            | P_trifoliata_00378_mRNA_18.1    |
| GF0048355 | 0                            | 0                         | 1                            | Hypothetical protein (1)                                     | -                                                                                                                                                                                                                                                                                                                                                                                                         | -                                                                                                                                                                                                                                                     | -                               | -                            | P_trifoliata_00378_mRNA_14.1    |
| GF0048354 | 0                            | 0                         | 1                            | Hypothetical protein (1)                                     | -                                                                                                                                                                                                                                                                                                                                                                                                         | -                                                                                                                                                                                                                                                     | -                               | -                            | P_trifoliata_00378_mRNA_13.1    |

| ID        | Num. in <i>C. clementiae</i> | Num. in <i>C. canihii</i> | Num. in <i>P. trifoliata</i> | Note                                                             | GO                                                                                                                                                                                                                                                                                                                                                         | InterPro                                                                                                                                                                                                                                                                             | Members in <i>C. clementiae</i> | Members in <i>C. canihii</i> | Members in <i>P. trifoliata</i> |
|-----------|------------------------------|---------------------------|------------------------------|------------------------------------------------------------------|------------------------------------------------------------------------------------------------------------------------------------------------------------------------------------------------------------------------------------------------------------------------------------------------------------------------------------------------------------|--------------------------------------------------------------------------------------------------------------------------------------------------------------------------------------------------------------------------------------------------------------------------------------|---------------------------------|------------------------------|---------------------------------|
| GF0048353 | 0                            | 0                         | 1                            | Hypothetical protein (1)                                         |                                                                                                                                                                                                                                                                                                                                                            |                                                                                                                                                                                                                                                                                      | -                               | -                            | P_trifoliata_00378_mRNA_12.1    |
| GF0048352 | 0                            | 0                         | 1                            | Transducin WD40 repeat-like superfamily protein isoform 1 (1)    | protein binding [GO:0005515 molecular_function] (1)                                                                                                                                                                                                                                                                                                        | WD40/YVTN repeat-like-containing domain [IPR015943] (1); WD40 repeat [IPR01688] (1); WD40-repeat-containing domain [IPR017986] (1)                                                                                                                                                   | -                               | -                            | P_trifoliata_00378_mRNA_1.1     |
| GF0048351 | 0                            | 0                         | 1                            | Hypothetical protein (1)                                         |                                                                                                                                                                                                                                                                                                                                                            |                                                                                                                                                                                                                                                                                      | -                               | -                            | P_trifoliata_00377_mRNA_9.1     |
| GF0048350 | 0                            | 0                         | 1                            | Hypothetical protein (1)                                         |                                                                                                                                                                                                                                                                                                                                                            |                                                                                                                                                                                                                                                                                      | -                               | -                            | P_trifoliata_00377_mRNA_5.1     |
| GF0048349 | 0                            | 0                         | 1                            | Hypothetical protein (1)                                         |                                                                                                                                                                                                                                                                                                                                                            |                                                                                                                                                                                                                                                                                      | -                               | -                            | P_trifoliata_00377_mRNA_3.1     |
| GF0048348 | 0                            | 0                         | 1                            | Type I proteinase inhibitor-like protein (1)                     | response to wounding [GO:0009611 biological_process] (1); serine-type endopeptidase inhibitor activity [GO:0044867 molecular_function] (1)                                                                                                                                                                                                                 | Proteinase inhibitor I13, potato inhibitor I [IPR000864] (1)                                                                                                                                                                                                                         | -                               | -                            | P_trifoliata_00377_mRNA_24.1    |
| GF0048347 | 0                            | 0                         | 1                            | Hypothetical protein (1)                                         |                                                                                                                                                                                                                                                                                                                                                            |                                                                                                                                                                                                                                                                                      | -                               | -                            | P_trifoliata_00377_mRNA_23.1    |
| GF0048346 | 0                            | 0                         | 1                            | Hypothetical protein (1)                                         |                                                                                                                                                                                                                                                                                                                                                            |                                                                                                                                                                                                                                                                                      | -                               | -                            | P_trifoliata_00377_mRNA_2.1     |
| GF0048345 | 0                            | 0                         | 1                            | Hypothetical protein (1)                                         |                                                                                                                                                                                                                                                                                                                                                            |                                                                                                                                                                                                                                                                                      | -                               | -                            | P_trifoliata_00377_mRNA_18.1    |
| GF0048344 | 0                            | 0                         | 1                            | Leucine-rich repeat (LRR) family protein (1)                     | protein binding [GO:0005515 molecular_function] (1)                                                                                                                                                                                                                                                                                                        | Leucine-rich repeat domain, L domain-like [IPR032675] (1); Leucine-rich repeat [IPR00161] (1)                                                                                                                                                                                        | -                               | -                            | P_trifoliata_00377_mRNA_17.1    |
| GF0048343 | 0                            | 0                         | 1                            | Hypothetical protein (1)                                         |                                                                                                                                                                                                                                                                                                                                                            |                                                                                                                                                                                                                                                                                      | -                               | -                            | P_trifoliata_00377_mRNA_13.1    |
| GF0048342 | 0                            | 0                         | 1                            | Hypothetical protein (1)                                         |                                                                                                                                                                                                                                                                                                                                                            |                                                                                                                                                                                                                                                                                      | -                               | -                            | P_trifoliata_00377_mRNA_12.1    |
| GF0048341 | 0                            | 0                         | 1                            | Hypothetical protein (1)                                         | protein binding [GO:0005515 molecular_function] (1)                                                                                                                                                                                                                                                                                                        | MATH/TRAF domain [IPR02083] (1); TRAF-like [IPR008974] (1)                                                                                                                                                                                                                           | -                               | -                            | P_trifoliata_00376_mRNA_6.1     |
| GF0048340 | 0                            | 0                         | 1                            | Translation elongation factor tu (1)                             |                                                                                                                                                                                                                                                                                                                                                            | Translation elongation factor EFTu/EFA, C-terminal [IPR004160] (1); Translation elongation factor EFA1/initiation factor IF2gamma, C-terminal [IPR009001] (1)                                                                                                                        | -                               | -                            | P_trifoliata_00376_mRNA_5.1     |
| GF0048339 | 0                            | 0                         | 1                            | Hypothetical protein (1)                                         |                                                                                                                                                                                                                                                                                                                                                            |                                                                                                                                                                                                                                                                                      | -                               | -                            | P_trifoliata_00376_mRNA_46.1    |
| GF0048338 | 0                            | 0                         | 1                            | Hypothetical protein (1)                                         |                                                                                                                                                                                                                                                                                                                                                            |                                                                                                                                                                                                                                                                                      | -                               | -                            | P_trifoliata_00376_mRNA_45.1    |
| GF0048337 | 0                            | 0                         | 1                            | Hypothetical protein (1)                                         |                                                                                                                                                                                                                                                                                                                                                            |                                                                                                                                                                                                                                                                                      | -                               | -                            | P_trifoliata_00376_mRNA_44.1    |
| GF0048336 | 0                            | 0                         | 1                            | Hypothetical protein (1)                                         |                                                                                                                                                                                                                                                                                                                                                            |                                                                                                                                                                                                                                                                                      | -                               | -                            | P_trifoliata_00376_mRNA_43.1    |
| GF0048335 | 0                            | 0                         | 1                            | Hypothetical protein (1)                                         |                                                                                                                                                                                                                                                                                                                                                            |                                                                                                                                                                                                                                                                                      | -                               | -                            | P_trifoliata_00376_mRNA_40.1    |
| GF0048334 | 0                            | 0                         | 1                            | Hypothetical protein (1)                                         | transmembrane transporter activity [GO:0022857 molecular_function] (1); integral component of membrane [GO:0016021 cellular_component] (1); transmembrane transport [GO:0050508 biological_process] (1)                                                                                                                                                    | Major facilitator superfamily domain [IPR020846] (1); Major facilitator, sugar transporter-like [IPR005826] (1)                                                                                                                                                                      | -                               | -                            | P_trifoliata_00376_mRNA_36.1    |
| GF0048333 | 0                            | 0                         | 1                            | Hypothetical protein (1)                                         |                                                                                                                                                                                                                                                                                                                                                            |                                                                                                                                                                                                                                                                                      | -                               | -                            | P_trifoliata_00376_mRNA_35.1    |
| GF0048332 | 0                            | 0                         | 1                            | Hypothetical protein (1)                                         |                                                                                                                                                                                                                                                                                                                                                            |                                                                                                                                                                                                                                                                                      | -                               | -                            | P_trifoliata_00376_mRNA_18.1    |
| GF0048331 | 0                            | 0                         | 1                            | Hypothetical protein (1)                                         |                                                                                                                                                                                                                                                                                                                                                            |                                                                                                                                                                                                                                                                                      | -                               | -                            | P_trifoliata_00376_mRNA_12.1    |
| GF0048330 | 0                            | 0                         | 1                            | Hypothetical protein (1)                                         |                                                                                                                                                                                                                                                                                                                                                            |                                                                                                                                                                                                                                                                                      | -                               | -                            | P_trifoliata_00375_mRNA_9.1     |
| GF0048329 | 0                            | 0                         | 1                            | Hypothetical protein (1)                                         |                                                                                                                                                                                                                                                                                                                                                            |                                                                                                                                                                                                                                                                                      | -                               | -                            | P_trifoliata_00375_mRNA_6.1     |
| GF0048328 | 0                            | 0                         | 1                            | Hypothetical protein (1)                                         |                                                                                                                                                                                                                                                                                                                                                            |                                                                                                                                                                                                                                                                                      | -                               | -                            | P_trifoliata_00375_mRNA_18.1    |
| GF0048327 | 0                            | 0                         | 1                            | Hypothetical protein (1)                                         |                                                                                                                                                                                                                                                                                                                                                            |                                                                                                                                                                                                                                                                                      | -                               | -                            | P_trifoliata_00375_mRNA_14.1    |
| GF0048326 | 0                            | 0                         | 1                            | Hypothetical protein (1)                                         |                                                                                                                                                                                                                                                                                                                                                            |                                                                                                                                                                                                                                                                                      | -                               | -                            | P_trifoliata_00375_mRNA_12.1    |
| GF0048325 | 0                            | 0                         | 1                            | Hypothetical protein (1)                                         |                                                                                                                                                                                                                                                                                                                                                            |                                                                                                                                                                                                                                                                                      | -                               | -                            | P_trifoliata_00374_mRNA_8.1     |
| GF0048324 | 0                            | 0                         | 1                            | Hypothetical protein (1)                                         |                                                                                                                                                                                                                                                                                                                                                            |                                                                                                                                                                                                                                                                                      | -                               | -                            | P_trifoliata_00374_mRNA_7.1     |
| GF0048323 | 0                            | 0                         | 1                            | Hypothetical protein (1)                                         |                                                                                                                                                                                                                                                                                                                                                            |                                                                                                                                                                                                                                                                                      | -                               | -                            | P_trifoliata_00374_mRNA_4.1     |
| GF0048322 | 0                            | 0                         | 1                            | Hypothetical protein (1)                                         |                                                                                                                                                                                                                                                                                                                                                            |                                                                                                                                                                                                                                                                                      | -                               | -                            | P_trifoliata_00374_mRNA_26.1    |
| GF0048321 | 0                            | 0                         | 1                            | Reticulene oxidase (1)                                           | oxidoreductase activity [GO:0016491 molecular_function] (1); oxidation-reduction process [GO:005514 biological_process] (1); flavin adenine dinucleotide binding [GO:0050660 molecular_function] (1); oxidoreductase activity, acting on CH-OH group of donors [GO:0016614 molecular_function] (1); catalytic activity [GO:0003824 molecular_function] (1) | FAD-binding, type 2 [IPR016166] (1); FAD linked oxidase, N-terminal [IPR006094] (1); CO dehydrogenase flavoprotein-like FAD-binding, subdomain 2 [IPR016169] (1)                                                                                                                     | -                               | -                            | P_trifoliata_00374_mRNA_25.1    |
| GF0048320 | 0                            | 0                         | 1                            | Hypothetical protein (1)                                         |                                                                                                                                                                                                                                                                                                                                                            |                                                                                                                                                                                                                                                                                      | -                               | -                            | P_trifoliata_00374_mRNA_24.1    |
| GF0048319 | 0                            | 0                         | 1                            | Hypothetical protein (1)                                         |                                                                                                                                                                                                                                                                                                                                                            |                                                                                                                                                                                                                                                                                      | -                               | -                            | P_trifoliata_00374_mRNA_22.1    |
| GF0048318 | 0                            | 0                         | 1                            | Hypothetical protein (1)                                         |                                                                                                                                                                                                                                                                                                                                                            |                                                                                                                                                                                                                                                                                      | -                               | -                            | P_trifoliata_00374_mRNA_17.1    |
| GF0048317 | 0                            | 0                         | 1                            | Hypothetical protein (1)                                         |                                                                                                                                                                                                                                                                                                                                                            |                                                                                                                                                                                                                                                                                      | -                               | -                            | P_trifoliata_00374_mRNA_15.1    |
| GF0048316 | 0                            | 0                         | 1                            | Hypothetical protein (1)                                         |                                                                                                                                                                                                                                                                                                                                                            |                                                                                                                                                                                                                                                                                      | -                               | -                            | P_trifoliata_00374_mRNA_14.1    |
| GF0048315 | 0                            | 0                         | 1                            | Hypothetical protein (1)                                         |                                                                                                                                                                                                                                                                                                                                                            |                                                                                                                                                                                                                                                                                      | -                               | -                            | P_trifoliata_00374_mRNA_10.1    |
| GF0048314 | 0                            | 0                         | 1                            | Hypothetical protein (1)                                         |                                                                                                                                                                                                                                                                                                                                                            | Pentatricopeptide repeat [IPR002885] (1)                                                                                                                                                                                                                                             | -                               | -                            | P_trifoliata_00373_mRNA_35.1    |
| GF0048313 | 0                            | 0                         | 1                            | Hypothetical protein (1)                                         |                                                                                                                                                                                                                                                                                                                                                            |                                                                                                                                                                                                                                                                                      | -                               | -                            | P_trifoliata_00373_mRNA_1.1     |
| GF0048312 | 0                            | 0                         | 1                            | Hypothetical protein (1)                                         |                                                                                                                                                                                                                                                                                                                                                            |                                                                                                                                                                                                                                                                                      | -                               | -                            | P_trifoliata_00372_mRNA_35.1    |
| GF0048311 | 0                            | 0                         | 1                            | Hypothetical protein (1)                                         |                                                                                                                                                                                                                                                                                                                                                            |                                                                                                                                                                                                                                                                                      | -                               | -                            | P_trifoliata_00372_mRNA_34.1    |
| GF0048310 | 0                            | 0                         | 1                            | Hypothetical protein (1)                                         | protein binding [GO:0005515 molecular_function] (1)                                                                                                                                                                                                                                                                                                        | Tetratricopeptide-like helical domain [IPR011990] (1)                                                                                                                                                                                                                                | -                               | -                            | P_trifoliata_00372_mRNA_33.1    |
| GF0048309 | 0                            | 0                         | 1                            | Hypothetical protein (1)                                         | integral component of membrane [GO:0016021 cellular_component] (1); transporter activity [GO:0005215 molecular_function] (1)                                                                                                                                                                                                                               | KHA domain [IPR021789] (1)                                                                                                                                                                                                                                                           | -                               | -                            | P_trifoliata_00372_mRNA_27.1    |
| GF0048308 | 0                            | 0                         | 1                            | Hypothetical protein (1)                                         |                                                                                                                                                                                                                                                                                                                                                            | Purine permease, plant [IPR030182] (1)                                                                                                                                                                                                                                               | -                               | -                            | P_trifoliata_00372_mRNA_2.1     |
| GF0048307 | 0                            | 0                         | 1                            | Hypothetical protein (1)                                         |                                                                                                                                                                                                                                                                                                                                                            |                                                                                                                                                                                                                                                                                      | -                               | -                            | P_trifoliata_00372_mRNA_17.1    |
| GF0048306 | 0                            | 0                         | 1                            | Leucine-rich repeat, typical subtype (1)                         | protein binding [GO:0005515 molecular_function] (1)                                                                                                                                                                                                                                                                                                        | Leucine-rich repeat domain, L domain-like [IPR032675] (1); Leucine-rich repeat [IPR00161] (1)                                                                                                                                                                                        | -                               | -                            | P_trifoliata_00371_mRNA_34.1    |
| GF0048305 | 0                            | 0                         | 1                            | Hypothetical protein (1)                                         |                                                                                                                                                                                                                                                                                                                                                            |                                                                                                                                                                                                                                                                                      | -                               | -                            | P_trifoliata_00371_mRNA_29.1    |
| GF0048304 | 0                            | 0                         | 1                            | Hypothetical protein (1)                                         |                                                                                                                                                                                                                                                                                                                                                            |                                                                                                                                                                                                                                                                                      | -                               | -                            | P_trifoliata_00371_mRNA_28.1    |
| GF0048303 | 0                            | 0                         | 1                            | 60S ribosomal protein L14 (1)                                    | ribosome [GO:0005840 cellular_component] (1); translation [GO:0006412 biological_process] (1); intracellular [GO:0005522 cellular_component] (1); structural constituent of ribosome [GO:0003735 molecular_function] (1)                                                                                                                                   | Translation protein S1E3-like domain [IPR008991] (1); Ribosomal protein L2 domain 2 [IPR014723] (1); Ribosomal protein L14 [IPR02784] (1)                                                                                                                                            | -                               | -                            | P_trifoliata_00371_mRNA_26.1    |
| GF0048302 | 0                            | 0                         | 1                            | Hypothetical protein (1)                                         |                                                                                                                                                                                                                                                                                                                                                            |                                                                                                                                                                                                                                                                                      | -                               | -                            | P_trifoliata_00371_mRNA_25.1    |
| GF0048301 | 0                            | 0                         | 1                            | Hypothetical protein (1)                                         |                                                                                                                                                                                                                                                                                                                                                            |                                                                                                                                                                                                                                                                                      | -                               | -                            | P_trifoliata_00371_mRNA_22.1    |
| GF0048300 | 0                            | 0                         | 1                            | Hypothetical protein (1)                                         |                                                                                                                                                                                                                                                                                                                                                            |                                                                                                                                                                                                                                                                                      | -                               | -                            | P_trifoliata_00371_mRNA_17.1    |
| GF0048299 | 0                            | 0                         | 1                            | Hypothetical protein (1)                                         |                                                                                                                                                                                                                                                                                                                                                            | Jas TPL-binding domain [IPR032308] (1)                                                                                                                                                                                                                                               | -                               | -                            | P_trifoliata_00371_mRNA_16.1    |
| GF0048298 | 0                            | 0                         | 1                            | Hypothetical protein (1)                                         |                                                                                                                                                                                                                                                                                                                                                            | Acyl-CoA N-acyltransferase [IPR016181] (1)                                                                                                                                                                                                                                           | -                               | -                            | P_trifoliata_00371_mRNA_15.1    |
| GF0048297 | 0                            | 0                         | 1                            | Hypothetical protein (1)                                         |                                                                                                                                                                                                                                                                                                                                                            |                                                                                                                                                                                                                                                                                      | -                               | -                            | P_trifoliata_00371_mRNA_14.1    |
| GF0048296 | 0                            | 0                         | 1                            | Pentatricopeptide repeat-containing protein, mitochondrial (1)   | protein binding [GO:0005515 molecular_function] (1)                                                                                                                                                                                                                                                                                                        | Pentatricopeptide repeat [IPR002885] (1); Tetratricopeptide-like helical domain [IPR011990] (1)                                                                                                                                                                                      | -                               | -                            | P_trifoliata_00371_mRNA_11.1    |
| GF0048295 | 0                            | 0                         | 1                            | Hypothetical protein (1)                                         |                                                                                                                                                                                                                                                                                                                                                            | Glutathione S-transferase, C-terminal-like [IPR010987] (1)                                                                                                                                                                                                                           | -                               | -                            | P_trifoliata_00370_mRNA_9.1     |
| GF0048294 | 0                            | 0                         | 1                            | Retrovirus-related P4 polyprotein from transposon TNT 1-94 (1)   |                                                                                                                                                                                                                                                                                                                                                            |                                                                                                                                                                                                                                                                                      | -                               | -                            | P_trifoliata_00370_mRNA_8.1     |
| GF0048293 | 0                            | 0                         | 1                            | Hypothetical protein (1)                                         |                                                                                                                                                                                                                                                                                                                                                            |                                                                                                                                                                                                                                                                                      | -                               | -                            | P_trifoliata_00370_mRNA_4.1     |
| GF0048292 | 0                            | 0                         | 1                            | Hypothetical protein (1)                                         |                                                                                                                                                                                                                                                                                                                                                            |                                                                                                                                                                                                                                                                                      | -                               | -                            | P_trifoliata_00370_mRNA_25.1    |
| GF0048291 | 0                            | 0                         | 1                            | Putative aspartic protease (1)                                   | proteolysis [GO:0006508 biological_process] (1); aspartic-type endopeptidase activity [GO:0004190 molecular_function] (1)                                                                                                                                                                                                                                  | Aspartic peptidase domain [IPR021109] (1); Peptidase family A1 domain [IPR033211] (1); Aspartic peptidase A1 family [IPR001461] (1); Xylanase inhibitor, C-terminal [IPR032799] (1); Xylanase inhibitor, N-terminal [IPR032861] (1); Aspartic peptidase, active site [IPR001969] (1) | -                               | -                            | P_trifoliata_00370_mRNA_17.1    |
| GF0048290 | 0                            | 0                         | 1                            | SLG-Sc and SLA-Sc genes and Melmoth retrotransposon sequence (1) |                                                                                                                                                                                                                                                                                                                                                            |                                                                                                                                                                                                                                                                                      | -                               | -                            | P_trifoliata_00370_mRNA_15.1    |
| GF0048289 | 0                            | 0                         | 1                            | TMV resistance protein N (1)                                     | ADP binding [GO:0043531 molecular_function] (1)                                                                                                                                                                                                                                                                                                            | NB-ARC [IPR002182] (1); P-loop containing nucleoside triphosphate hydrolase [IPR027417] (1)                                                                                                                                                                                          | -                               | -                            | P_trifoliata_00370_mRNA_12.1    |
| GF0048288 | 0                            | 0                         | 1                            | Hypothetical protein (1)                                         |                                                                                                                                                                                                                                                                                                                                                            |                                                                                                                                                                                                                                                                                      | -                               | -                            | P_trifoliata_00370_mRNA_1.1     |
| GF0048287 | 0                            | 0                         | 1                            | Glutaredoxin (1)                                                 | cell redox homeostasis [GO:004544 biological_process] (1); electron carrier activity [GO:0009055 molecular_function] (1); protein disulfide oxidoreductase activity [GO:0015035 molecular_function] (1)                                                                                                                                                    | Glutaredoxin, eukaryotic/viral [IPR011899] (1); Glutaredoxin [IPR002109] (1); Thioredoxin, conserved molecular function (1); Thioredoxin-like site [IPR017937] (1); Thioredoxin-like fold [IPR012336] (1); Glutaredoxin subgroup [IPR014025] (1)                                     | -                               | -                            | P_trifoliata_00369_mRNA_7.1     |
| GF0048286 | 0                            | 0                         | 1                            | Hypothetical protein (1)                                         | regulation of cyclin-dependent protein serine/threonine kinase activity [GO:000079 biological_process] (1); protein kinase binding [GO:0019901 molecular_function] (1)                                                                                                                                                                                     | Cyclin PH080-like [IPR013922] (1)                                                                                                                                                                                                                                                    | -                               | -                            | P_trifoliata_00369_mRNA_6.1     |
| GF0048285 | 0                            | 0                         | 1                            | Hypothetical protein (1)                                         |                                                                                                                                                                                                                                                                                                                                                            |                                                                                                                                                                                                                                                                                      | -                               | -                            | P_trifoliata_00369_mRNA_29.1    |
| GF0048284 | 0                            | 0                         | 1                            | Hypothetical protein (1)                                         |                                                                                                                                                                                                                                                                                                                                                            |                                                                                                                                                                                                                                                                                      | -                               | -                            | P_trifoliata_00369_mRNA_27.1    |
| GF0048283 | 0                            | 0                         | 1                            | Hypothetical protein (1)                                         |                                                                                                                                                                                                                                                                                                                                                            |                                                                                                                                                                                                                                                                                      | -                               | -                            | P_trifoliata_00369_mRNA_25.1    |
| GF0048282 | 0                            | 0                         | 1                            | Hypothetical protein (1)                                         |                                                                                                                                                                                                                                                                                                                                                            |                                                                                                                                                                                                                                                                                      | -                               | -                            | P_trifoliata_00369_mRNA_23.1    |
| GF0048281 | 0                            | 0                         | 1                            | Hypothetical protein (1)                                         |                                                                                                                                                                                                                                                                                                                                                            |                                                                                                                                                                                                                                                                                      | -                               | -                            | P_trifoliata_00369_mRNA_21.1    |
| GF0048280 | 0                            | 0                         | 1                            | Hypothetical protein (1)                                         |                                                                                                                                                                                                                                                                                                                                                            |                                                                                                                                                                                                                                                                                      | -                               | -                            | P_trifoliata_00369_mRNA_20.1    |
| GF0048279 | 0                            | 0                         | 1                            | Hypothetical protein (1)                                         |                                                                                                                                                                                                                                                                                                                                                            |                                                                                                                                                                                                                                                                                      | -                               | -                            | P_trifoliata_00369_mRNA_19.1    |
| GF0048278 | 0                            | 0                         | 1                            | Hypothetical protein (1)                                         |                                                                                                                                                                                                                                                                                                                                                            |                                                                                                                                                                                                                                                                                      | -                               | -                            | P_trifoliata_00369_mRNA_18.1    |
| GF0048277 | 0                            | 0                         | 1                            | Blue copper protein (1)                                          | electron carrier activity [GO:0009055 molecular_function] (1)                                                                                                                                                                                                                                                                                              | Phytocyanin domain [IPR003245] (1); Cupredoxin [IPR00972] (1)                                                                                                                                                                                                                        | -                               | -                            | P_trifoliata_00369_mRNA_16.1    |



| ID        | Num. in <i>C. clementiae</i> | Num. in <i>C. canihii</i> | Num. in <i>P. trifoliata</i> | Note                                                            | GO                                                                                                                                                                                                                                                                                                                                                                                                 | InterPro                                                                                                                                                                                                                               | Members in <i>C. clementiae</i> | Members in <i>C. canihii</i> | Members in <i>P. trifoliata</i> |
|-----------|------------------------------|---------------------------|------------------------------|-----------------------------------------------------------------|----------------------------------------------------------------------------------------------------------------------------------------------------------------------------------------------------------------------------------------------------------------------------------------------------------------------------------------------------------------------------------------------------|----------------------------------------------------------------------------------------------------------------------------------------------------------------------------------------------------------------------------------------|---------------------------------|------------------------------|---------------------------------|
| GF0048276 | 0                            | 0                         | 1                            | Hypothetical protein (1)                                        |                                                                                                                                                                                                                                                                                                                                                                                                    |                                                                                                                                                                                                                                        |                                 |                              | P_trifoliata_00368_mRNA_46.1    |
| GF0048275 | 0                            | 0                         | 1                            | Hypothetical protein (1)                                        |                                                                                                                                                                                                                                                                                                                                                                                                    |                                                                                                                                                                                                                                        |                                 |                              | P_trifoliata_00368_mRNA_41.1    |
| GF0048274 | 0                            | 0                         | 1                            | Hypothetical protein (1)                                        | steroid biosynthetic process<br>[GO:0006694 biological_process] (1);<br>methyltransferase activity [GO:0008168<br>molecular_function] (1)                                                                                                                                                                                                                                                          | S-adenosyl-L-methionine-dependent<br>methyltransferase [IPRO29083] (1);<br>SAM-dependent methyltransferase SMT-<br>type [IPRO3084] (1); Steroid<br>methyltransferase C-terminal<br>[IPRO13705] (1)                                     |                                 |                              | P_trifoliata_00368_mRNA_3.1     |
| GF0048273 | 0                            | 0                         | 1                            | Hypothetical protein (1)                                        |                                                                                                                                                                                                                                                                                                                                                                                                    |                                                                                                                                                                                                                                        |                                 |                              | P_trifoliata_00368_mRNA_16.1    |
| GF0048272 | 0                            | 0                         | 1                            | 60S ribosomal protein L31 (1)                                   | structural constituent of ribosome<br>[GO:0003735 molecular_function] (1);<br>translation [GO:0006412<br>biological_process] (1); intracellular<br>[GO:0005622 cellular_component] (1);<br>ribosome [GO:0005840<br>cellular_component] (1)                                                                                                                                                         | Ribosomal protein L31c, conserved site<br>[IPRO20052] (1); Ribosomal protein<br>L31c [IPRO00554] (1); Ribosomal<br>protein L31c domain [IPRO23621] (1)                                                                                 |                                 |                              | P_trifoliata_00368_mRNA_10.1    |
| GF0048271 | 0                            | 0                         | 1                            | Hypothetical protein (1)                                        |                                                                                                                                                                                                                                                                                                                                                                                                    | Domain of unknown function DUF4283<br>[IPRO25558] (1)                                                                                                                                                                                  |                                 |                              | P_trifoliata_00367_mRNA_5.1     |
| GF0048270 | 0                            | 0                         | 1                            | Hypothetical protein (1)                                        |                                                                                                                                                                                                                                                                                                                                                                                                    |                                                                                                                                                                                                                                        |                                 |                              | P_trifoliata_00367_mRNA_32.1    |
| GF0048269 | 0                            | 0                         | 1                            | Hypothetical protein (1)                                        |                                                                                                                                                                                                                                                                                                                                                                                                    |                                                                                                                                                                                                                                        |                                 |                              | P_trifoliata_00367_mRNA_29.1    |
| GF0048268 | 0                            | 0                         | 1                            | Hypothetical protein (1)                                        |                                                                                                                                                                                                                                                                                                                                                                                                    |                                                                                                                                                                                                                                        |                                 |                              | P_trifoliata_00367_mRNA_2.1     |
| GF0048267 | 0                            | 0                         | 1                            | Hypothetical protein (1)                                        |                                                                                                                                                                                                                                                                                                                                                                                                    |                                                                                                                                                                                                                                        |                                 |                              | P_trifoliata_00367_mRNA_1.1     |
| GF0048266 | 0                            | 0                         | 1                            | Hypothetical protein (1)                                        |                                                                                                                                                                                                                                                                                                                                                                                                    |                                                                                                                                                                                                                                        |                                 |                              | P_trifoliata_00366_mRNA_8.1     |
| GF0048265 | 0                            | 0                         | 1                            | Hypothetical protein (1)                                        |                                                                                                                                                                                                                                                                                                                                                                                                    |                                                                                                                                                                                                                                        |                                 |                              | P_trifoliata_00366_mRNA_7.1     |
| GF0048264 | 0                            | 0                         | 1                            | Hypothetical protein (1)                                        | aspartic-type endopeptidase activity<br>[GO:0004190 molecular_function] (1);<br>proteolysis [GO:0005608<br>biological_process] (1)                                                                                                                                                                                                                                                                 | Aspartic peptidase domain [IPRO21109]<br>(1); Aspartic peptidase, active site<br>[IPRO1969] (1)                                                                                                                                        |                                 |                              | P_trifoliata_00366_mRNA_6.1     |
| GF0048263 | 0                            | 0                         | 1                            | Hypothetical protein (1)                                        |                                                                                                                                                                                                                                                                                                                                                                                                    |                                                                                                                                                                                                                                        |                                 |                              | P_trifoliata_00366_mRNA_5.1     |
| GF0048262 | 0                            | 0                         | 1                            | Hypothetical protein (1)                                        |                                                                                                                                                                                                                                                                                                                                                                                                    | FAR1 DNA binding domain<br>[IPRO04330] (1)                                                                                                                                                                                             |                                 |                              | P_trifoliata_00366_mRNA_22.1    |
| GF0048261 | 0                            | 0                         | 1                            | Hypothetical protein (1)                                        |                                                                                                                                                                                                                                                                                                                                                                                                    |                                                                                                                                                                                                                                        |                                 |                              | P_trifoliata_00366_mRNA_2.1     |
| GF0048260 | 0                            | 0                         | 1                            | Cytochrome P450 family protein (1)                              | heme binding [GO:0020037<br>molecular_function] (1); iron ion binding<br>[GO:0005506 molecular_function] (1);<br>DNA binding [GO:0003677<br>molecular_function] (1); oxidoreductase<br>activity, acting on paired donors, with<br>incorporation or reduction of molecular<br>oxygen [GO:0016705<br>molecular_function] (1); oxidation-<br>reduction process [GO:0055114<br>biological_process] (1) | Aspartate carboxyltransferase<br>regulatory subunit, C-terminal<br>[IPRO20542] (1); Cytochrome P450<br>[IPRO01128] (1); Zinc finger, BED-type<br>[IPRO36565] (1)                                                                       |                                 |                              | P_trifoliata_00366_mRNA_12.1    |
| GF0048259 | 0                            | 0                         | 1                            | Hypothetical protein (1)                                        |                                                                                                                                                                                                                                                                                                                                                                                                    |                                                                                                                                                                                                                                        |                                 |                              | P_trifoliata_00366_mRNA_10.1    |
| GF0048258 | 0                            | 0                         | 1                            | Hypothetical protein (1)                                        |                                                                                                                                                                                                                                                                                                                                                                                                    |                                                                                                                                                                                                                                        |                                 |                              | P_trifoliata_00366_mRNA_1.1     |
| GF0048257 | 0                            | 0                         | 1                            | Hypothetical protein (1)                                        |                                                                                                                                                                                                                                                                                                                                                                                                    |                                                                                                                                                                                                                                        |                                 |                              | P_trifoliata_00365_mRNA_5.1     |
| GF0048256 | 0                            | 0                         | 1                            | Hypothetical protein (1)                                        |                                                                                                                                                                                                                                                                                                                                                                                                    |                                                                                                                                                                                                                                        |                                 |                              | P_trifoliata_00365_mRNA_45.1    |
| GF0048255 | 0                            | 0                         | 1                            | Hypothetical protein (1)                                        |                                                                                                                                                                                                                                                                                                                                                                                                    | Major facilitator superfamily domain<br>[IPRO20846] (1)                                                                                                                                                                                |                                 |                              | P_trifoliata_00365_mRNA_44.1    |
| GF0048254 | 0                            | 0                         | 1                            | Hypothetical protein (1)                                        |                                                                                                                                                                                                                                                                                                                                                                                                    | VQ [IPRO8889] (1)                                                                                                                                                                                                                      |                                 |                              | P_trifoliata_00365_mRNA_38.1    |
| GF0048253 | 0                            | 0                         | 1                            | Hypothetical protein (1)                                        |                                                                                                                                                                                                                                                                                                                                                                                                    |                                                                                                                                                                                                                                        |                                 |                              | P_trifoliata_00365_mRNA_27.1    |
| GF0048252 | 0                            | 0                         | 1                            | Hypothetical protein (1)                                        |                                                                                                                                                                                                                                                                                                                                                                                                    | Bull-type lectin domain [IPRO1480] (1)                                                                                                                                                                                                 |                                 |                              | P_trifoliata_00365_mRNA_26.1    |
| GF0048251 | 0                            | 0                         | 1                            | Hypothetical protein (1)                                        |                                                                                                                                                                                                                                                                                                                                                                                                    | Ankyrin repeat-containing domain<br>[IPRO20683] (1)                                                                                                                                                                                    |                                 |                              | P_trifoliata_00364_mRNA_35.1    |
| GF0048250 | 0                            | 0                         | 1                            | Hypothetical protein (1)                                        |                                                                                                                                                                                                                                                                                                                                                                                                    |                                                                                                                                                                                                                                        |                                 |                              | P_trifoliata_00364_mRNA_29.1    |
| GF0048249 | 0                            | 0                         | 1                            | Hypothetical protein (1)                                        |                                                                                                                                                                                                                                                                                                                                                                                                    |                                                                                                                                                                                                                                        |                                 |                              | P_trifoliata_00364_mRNA_28.1    |
| GF0048248 | 0                            | 0                         | 1                            | DNA repair and recombination protein<br>RAD54-like (1)          | ATP binding [GO:0005524<br>molecular_function] (1)                                                                                                                                                                                                                                                                                                                                                 | P-loop containing nucleoside<br>triphosphate hydrolase [IPRO27417] (1);<br>Helicase superfamily 1/2, ATP-binding<br>domain [IPRO14001] (1); SNF2-related,<br>N-terminal domain [IPRO0330] (1);<br>Helicase, C-terminal [IPRO01650] (1) |                                 |                              | P_trifoliata_00364_mRNA_27.1    |
| GF0048247 | 0                            | 0                         | 1                            | Hypothetical protein (1)                                        |                                                                                                                                                                                                                                                                                                                                                                                                    |                                                                                                                                                                                                                                        |                                 |                              | P_trifoliata_00364_mRNA_24.1    |
| GF0048246 | 0                            | 0                         | 1                            | Hypothetical protein (1)                                        |                                                                                                                                                                                                                                                                                                                                                                                                    | Leucine-rich repeat domain, L domain-<br>like [IPRO32675] (1)                                                                                                                                                                          |                                 |                              | P_trifoliata_00364_mRNA_23.1    |
| GF0048245 | 0                            | 0                         | 1                            | DEAD-box ATP-dependent RNA<br>helicase 19 (1)                   |                                                                                                                                                                                                                                                                                                                                                                                                    | Helicase, C-terminal [IPRO01650] (1); P-<br>loop containing nucleoside triphosphate<br>hydrolase [IPRO27417] (1)                                                                                                                       |                                 |                              | P_trifoliata_00364_mRNA_22.1    |
| GF0048244 | 0                            | 0                         | 1                            | Hypothetical protein (1)                                        |                                                                                                                                                                                                                                                                                                                                                                                                    |                                                                                                                                                                                                                                        |                                 |                              | P_trifoliata_00364_mRNA_2.1     |
| GF0048243 | 0                            | 0                         | 1                            | Glutaredoxin (GRX) family protein (1)                           | electron carrier activity [GO:0009055<br>molecular_function] (1); cell redox<br>homeostasis [GO:0045454<br>biological_process] (1); protein disulfide<br>oxidoreductase activity [GO:0015035<br>molecular_function] (1)                                                                                                                                                                            | Thioredoxin-like fold [IPRO12336] (1);<br>Glutaredoxin [IPRO2109] (1)                                                                                                                                                                  |                                 |                              | P_trifoliata_00364_mRNA_15.1    |
| GF0048242 | 0                            | 0                         | 1                            | Hypothetical protein (1)                                        |                                                                                                                                                                                                                                                                                                                                                                                                    |                                                                                                                                                                                                                                        |                                 |                              | P_trifoliata_00363_mRNA_35.1    |
| GF0048241 | 0                            | 0                         | 1                            | Hypothetical protein (1)                                        | oxidation-reduction process<br>[GO:0055114 biological_process] (1);<br>peroxidase activity [GO:0004601<br>molecular_function] (1); response to<br>oxidative stress [GO:0006979<br>biological_process] (1); heme binding<br>[GO:0020037 molecular_function] (1)                                                                                                                                     | Plant peroxidase [IPRO08231] (1); Haem<br>peroxidase, plant/fungal/bacterial<br>[IPRO02016] (1); Haem peroxidase<br>[IPRO10255] (1)                                                                                                    |                                 |                              | P_trifoliata_00363_mRNA_3.1     |
| GF0048240 | 0                            | 0                         | 1                            | Hypothetical protein (1)                                        | metallopeptidase activity [GO:0008237<br>molecular_function] (1)                                                                                                                                                                                                                                                                                                                                   | Metallopeptidase, catalytic domain<br>[IPRO24079] (1)                                                                                                                                                                                  |                                 |                              | P_trifoliata_00363_mRNA_13.1    |
| GF0048239 | 0                            | 0                         | 1                            | Hypothetical protein (1)                                        |                                                                                                                                                                                                                                                                                                                                                                                                    |                                                                                                                                                                                                                                        |                                 |                              | P_trifoliata_00363_mRNA_1.1     |
| GF0048238 | 0                            | 0                         | 1                            | Hypothetical protein (1)                                        |                                                                                                                                                                                                                                                                                                                                                                                                    | Zinc knuckle CX2CX4HX4C<br>[IPRO25836] (1)                                                                                                                                                                                             |                                 |                              | P_trifoliata_00362_mRNA_34.1    |
| GF0048237 | 0                            | 0                         | 1                            | Seed lectin (1)                                                 | carbohydrate binding [GO:0030246<br>molecular_function] (1)                                                                                                                                                                                                                                                                                                                                        | Legume lectin, beta chain, MmCa-<br>binding site [IPRO19825] (1);<br>Concanavalin A-like lectin/glucanase<br>domain [IPRO13320] (1); Legume lectin<br>domain [IPRO01220] (1)                                                           |                                 |                              | P_trifoliata_00362_mRNA_29.1    |
| GF0048236 | 0                            | 0                         | 1                            | Hypothetical protein (1)                                        |                                                                                                                                                                                                                                                                                                                                                                                                    |                                                                                                                                                                                                                                        |                                 |                              | P_trifoliata_00362_mRNA_28.1    |
| GF0048235 | 0                            | 0                         | 1                            | Hypothetical protein (1)                                        |                                                                                                                                                                                                                                                                                                                                                                                                    |                                                                                                                                                                                                                                        |                                 |                              | P_trifoliata_00362_mRNA_14.1    |
| GF0048234 | 0                            | 0                         | 1                            | Hypothetical protein (1)                                        |                                                                                                                                                                                                                                                                                                                                                                                                    |                                                                                                                                                                                                                                        |                                 |                              | P_trifoliata_00361_mRNA_30.1    |
| GF0048233 | 0                            | 0                         | 1                            | Hypothetical protein (1)                                        |                                                                                                                                                                                                                                                                                                                                                                                                    |                                                                                                                                                                                                                                        |                                 |                              | P_trifoliata_00361_mRNA_28.1    |
| GF0048232 | 0                            | 0                         | 1                            | Hypothetical protein (1)                                        | carbohydrate metabolic process<br>[GO:0005975 biological_process] (1);<br>polysaccharide catabolic process<br>[GO:0000272 biological_process] (1);<br>beta-amylase activity [GO:0016161<br>molecular_function] (1)                                                                                                                                                                                 | Glycoside hydrolase, family 14<br>[IPRO01554] (1); Glycoside hydrolase,<br>catalytic domain [IPRO13781] (1);<br>Glycoside hydrolase superfamily<br>[IPRO17853] (1)                                                                     |                                 |                              | P_trifoliata_00361_mRNA_24.1    |
| GF0048231 | 0                            | 0                         | 1                            | Hypothetical protein (1)                                        |                                                                                                                                                                                                                                                                                                                                                                                                    |                                                                                                                                                                                                                                        |                                 |                              | P_trifoliata_00361_mRNA_21.1    |
| GF0048230 | 0                            | 0                         | 1                            | Hypothetical protein (1)                                        |                                                                                                                                                                                                                                                                                                                                                                                                    |                                                                                                                                                                                                                                        |                                 |                              | P_trifoliata_00361_mRNA_2.1     |
| GF0048229 | 0                            | 0                         | 1                            | Hypothetical protein (1)                                        | nucleic acid binding [GO:0003676<br>molecular_function] (1)                                                                                                                                                                                                                                                                                                                                        | Ribonuclease H-like domain<br>[IPRO12337] (1)                                                                                                                                                                                          |                                 |                              | P_trifoliata_00361_mRNA_13.1    |
| GF0048228 | 0                            | 0                         | 1                            | Monosaccharide transport protein (1)                            |                                                                                                                                                                                                                                                                                                                                                                                                    | NB-ABC [IPRO02182] (1); Leucine-rich<br>repeat domain, L domain-like<br>[IPRO32675] (1)                                                                                                                                                |                                 |                              | P_trifoliata_00360_mRNA_9.1     |
| GF0048227 | 0                            | 0                         | 1                            | Putative disease resistance RPP8-like<br>protein 2 (1)          | ADP binding [GO:0043531<br>molecular_function] (1)                                                                                                                                                                                                                                                                                                                                                 |                                                                                                                                                                                                                                        |                                 |                              | P_trifoliata_00360_mRNA_4.1     |
| GF0048226 | 0                            | 0                         | 1                            | Hypothetical protein (1)                                        |                                                                                                                                                                                                                                                                                                                                                                                                    |                                                                                                                                                                                                                                        |                                 |                              | P_trifoliata_00360_mRNA_30.1    |
| GF0048225 | 0                            | 0                         | 1                            | Hypothetical protein (1)                                        |                                                                                                                                                                                                                                                                                                                                                                                                    |                                                                                                                                                                                                                                        |                                 |                              | P_trifoliata_00360_mRNA_23.1    |
| GF0048224 | 0                            | 0                         | 1                            | DUF936 family protein (1)                                       |                                                                                                                                                                                                                                                                                                                                                                                                    | Protein of unknown function DUF936,<br>plant [IPRO10341] (1)                                                                                                                                                                           |                                 |                              | P_trifoliata_00360_mRNA_17.1    |
| GF0048223 | 0                            | 0                         | 1                            | Hypothetical protein (1)                                        |                                                                                                                                                                                                                                                                                                                                                                                                    |                                                                                                                                                                                                                                        |                                 |                              | P_trifoliata_00360_mRNA_12.1    |
| GF0048222 | 0                            | 0                         | 1                            | Hypothetical protein (1)                                        | RNA binding [GO:0003723<br>molecular_function] (1)                                                                                                                                                                                                                                                                                                                                                 | RNA-binding, CRM domain<br>[IPRO01890] (1)                                                                                                                                                                                             |                                 |                              | P_trifoliata_00359_mRNA_9.1     |
| GF0048221 | 0                            | 0                         | 1                            | Hypothetical protein (1)                                        |                                                                                                                                                                                                                                                                                                                                                                                                    | Viral movement protein [IPRO28919] (1)                                                                                                                                                                                                 |                                 |                              | P_trifoliata_00359_mRNA_7.1     |
| GF0048220 | 0                            | 0                         | 1                            | Hypothetical protein (1)                                        |                                                                                                                                                                                                                                                                                                                                                                                                    |                                                                                                                                                                                                                                        |                                 |                              | P_trifoliata_00359_mRNA_6.1     |
| GF0048219 | 0                            | 0                         | 1                            | Hypothetical protein (1)                                        |                                                                                                                                                                                                                                                                                                                                                                                                    |                                                                                                                                                                                                                                        |                                 |                              | P_trifoliata_00359_mRNA_5.1     |
| GF0048218 | 0                            | 0                         | 1                            | Hypothetical protein (1)                                        |                                                                                                                                                                                                                                                                                                                                                                                                    | Leucine-rich repeat domain, L domain-<br>like [IPRO32675] (1)                                                                                                                                                                          |                                 |                              | P_trifoliata_00359_mRNA_37.1    |
| GF0048217 | 0                            | 0                         | 1                            | Putative disease resistance gene NBS-<br>LRR family protein (1) |                                                                                                                                                                                                                                                                                                                                                                                                    | Leucine-rich repeat domain, L domain-<br>like [IPRO32675] (1)                                                                                                                                                                          |                                 |                              | P_trifoliata_00359_mRNA_36.1    |
| GF0048216 | 0                            | 0                         | 1                            | Hypothetical protein (1)                                        |                                                                                                                                                                                                                                                                                                                                                                                                    |                                                                                                                                                                                                                                        |                                 |                              | P_trifoliata_00359_mRNA_35.1    |
| GF0048215 | 0                            | 0                         | 1                            | Putative disease resistance gene NBS-<br>LRR family protein (1) |                                                                                                                                                                                                                                                                                                                                                                                                    | Leucine-rich repeat domain, L domain-<br>like [IPRO32675] (1)                                                                                                                                                                          |                                 |                              | P_trifoliata_00359_mRNA_34.1    |
| GF0048214 | 0                            | 0                         | 1                            | Phosphoprotein phosphatase (1)                                  |                                                                                                                                                                                                                                                                                                                                                                                                    | Leucine-rich repeat domain, L domain-<br>like [IPRO32675] (1)                                                                                                                                                                          |                                 |                              | P_trifoliata_00359_mRNA_32.1    |
| GF0048213 | 0                            | 0                         | 1                            | NBS-LRR type disease resistance protein<br>(1)                  |                                                                                                                                                                                                                                                                                                                                                                                                    | P-loop containing nucleoside<br>triphosphate hydrolase [IPRO27417] (1)                                                                                                                                                                 |                                 |                              | P_trifoliata_00359_mRNA_30.1    |
| GF0048212 | 0                            | 0                         | 1                            | Putative disease resistance gene NBS-<br>LRR family protein (1) | ADP binding [GO:0043531<br>molecular_function] (1)                                                                                                                                                                                                                                                                                                                                                 | NB-ABC [IPRO02182] (1); P-loop<br>containing nucleoside triphosphate<br>hydrolase [IPRO27417] (1); Leucine-rich<br>repeat domain, L domain-like<br>[IPRO32675] (1)                                                                     |                                 |                              | P_trifoliata_00359_mRNA_29.1    |
| GF0048211 | 0                            | 0                         | 1                            | Hypothetical protein (1)                                        |                                                                                                                                                                                                                                                                                                                                                                                                    |                                                                                                                                                                                                                                        |                                 |                              | P_trifoliata_00359_mRNA_26.1    |
| GF0048210 | 0                            | 0                         | 1                            | Hypothetical protein (1)                                        |                                                                                                                                                                                                                                                                                                                                                                                                    |                                                                                                                                                                                                                                        |                                 |                              | P_trifoliata_00359_mRNA_24.1    |
| GF0048209 | 0                            | 0                         | 1                            | Hypothetical protein (1)                                        |                                                                                                                                                                                                                                                                                                                                                                                                    |                                                                                                                                                                                                                                        |                                 |                              | P_trifoliata_00359_mRNA_23.1    |
| GF0048208 | 0                            | 0                         | 1                            | Hypothetical protein (1)                                        | membrane [GO:0016020<br>cellular_component] (1)                                                                                                                                                                                                                                                                                                                                                    | ABC-2 type transporter [IPRO13525] (1)                                                                                                                                                                                                 |                                 |                              | P_trifoliata_00359_mRNA_21.1    |
| GF0048207 | 0                            | 0                         | 1                            | Hypothetical protein (1)                                        |                                                                                                                                                                                                                                                                                                                                                                                                    |                                                                                                                                                                                                                                        |                                 |                              | P_trifoliata_00359_mRNA_19.1    |
| GF0048206 | 0                            | 0                         | 1                            | Putative transposable element (1)                               |                                                                                                                                                                                                                                                                                                                                                                                                    | Domain of unknown function DUF4216<br>[IPRO25312] (1); Domain of unknown<br>function DUF4218 [IPRO25452] (1)                                                                                                                           |                                 |                              | P_trifoliata_00359_mRNA_18.1    |

| ID        | Num. in <i>C. clementiae</i> | Num. in <i>C. canihii</i> | Num. in <i>P. trifoliata</i> | Note                                                                    | GO                                                                                                                                                                                                                                                                                                                                                                                                                                                            | InterPro                                                                                                                                                                                                                                                                                                                                                                                                                                                                                                      | Members in <i>C. clementiae</i> | Members in <i>C. canihii</i> | Members in <i>P. trifoliata</i> |
|-----------|------------------------------|---------------------------|------------------------------|-------------------------------------------------------------------------|---------------------------------------------------------------------------------------------------------------------------------------------------------------------------------------------------------------------------------------------------------------------------------------------------------------------------------------------------------------------------------------------------------------------------------------------------------------|---------------------------------------------------------------------------------------------------------------------------------------------------------------------------------------------------------------------------------------------------------------------------------------------------------------------------------------------------------------------------------------------------------------------------------------------------------------------------------------------------------------|---------------------------------|------------------------------|---------------------------------|
| GF0048205 | 0                            | 0                         | 0                            | 1 Hypothetical protein (1)                                              |                                                                                                                                                                                                                                                                                                                                                                                                                                                               |                                                                                                                                                                                                                                                                                                                                                                                                                                                                                                               | -                               | -                            | P_trifoliata_00359_mRNA_17,1    |
| GF0048204 | 0                            | 0                         | 0                            | 1 Hypothetical protein (1)                                              |                                                                                                                                                                                                                                                                                                                                                                                                                                                               |                                                                                                                                                                                                                                                                                                                                                                                                                                                                                                               | -                               | -                            | P_trifoliata_00359_mRNA_15,1    |
| GF0048203 | 0                            | 0                         | 0                            | 1 Hypothetical protein (1)                                              |                                                                                                                                                                                                                                                                                                                                                                                                                                                               |                                                                                                                                                                                                                                                                                                                                                                                                                                                                                                               | -                               | -                            | P_trifoliata_00359_mRNA_14,1    |
| GF0048202 | 0                            | 0                         | 0                            | 1 Hypothetical protein (1)                                              |                                                                                                                                                                                                                                                                                                                                                                                                                                                               |                                                                                                                                                                                                                                                                                                                                                                                                                                                                                                               | -                               | -                            | P_trifoliata_00359_mRNA_11,1    |
| GF0048201 | 0                            | 0                         | 0                            | 1 Hypothetical protein (1)                                              |                                                                                                                                                                                                                                                                                                                                                                                                                                                               |                                                                                                                                                                                                                                                                                                                                                                                                                                                                                                               | -                               | -                            | P_trifoliata_00359_mRNA_1,1     |
| GF0048200 | 0                            | 0                         | 0                            | 1 Hypothetical protein (1)                                              |                                                                                                                                                                                                                                                                                                                                                                                                                                                               |                                                                                                                                                                                                                                                                                                                                                                                                                                                                                                               | -                               | -                            | P_trifoliata_00358_mRNA_6,1     |
| GF0048199 | 0                            | 0                         | 0                            | 1 NBS-LRR class resistance protein Fy1-Ryl1 (1)                         | ADP binding [GO:0043531 molecular_function] (1)                                                                                                                                                                                                                                                                                                                                                                                                               | NB-ARC [IPRO02182] (1); P-loop containing nucleoside triphosphate hydrolase [IPRO27417] (1)                                                                                                                                                                                                                                                                                                                                                                                                                   | -                               | -                            | P_trifoliata_00358_mRNA_5,1     |
| GF0048198 | 0                            | 0                         | 0                            | 1 Hypothetical protein (1)                                              |                                                                                                                                                                                                                                                                                                                                                                                                                                                               |                                                                                                                                                                                                                                                                                                                                                                                                                                                                                                               | -                               | -                            | P_trifoliata_00358_mRNA_4,1     |
| GF0048197 | 0                            | 0                         | 0                            | 1 Hypothetical protein (1)                                              |                                                                                                                                                                                                                                                                                                                                                                                                                                                               |                                                                                                                                                                                                                                                                                                                                                                                                                                                                                                               | -                               | -                            | P_trifoliata_00358_mRNA_39,1    |
| GF0048196 | 0                            | 0                         | 0                            | 1 Hypothetical protein (1)                                              |                                                                                                                                                                                                                                                                                                                                                                                                                                                               |                                                                                                                                                                                                                                                                                                                                                                                                                                                                                                               | -                               | -                            | P_trifoliata_00358_mRNA_36,1    |
| GF0048195 | 0                            | 0                         | 0                            | 1 Hypothetical protein (1)                                              |                                                                                                                                                                                                                                                                                                                                                                                                                                                               |                                                                                                                                                                                                                                                                                                                                                                                                                                                                                                               | -                               | -                            | P_trifoliata_00358_mRNA_34,1    |
| GF0048194 | 0                            | 0                         | 0                            | 1 Hypothetical protein (1)                                              |                                                                                                                                                                                                                                                                                                                                                                                                                                                               |                                                                                                                                                                                                                                                                                                                                                                                                                                                                                                               | -                               | -                            | P_trifoliata_00358_mRNA_33,1    |
| GF0048193 | 0                            | 0                         | 0                            | 1 Hypothetical protein (1)                                              |                                                                                                                                                                                                                                                                                                                                                                                                                                                               |                                                                                                                                                                                                                                                                                                                                                                                                                                                                                                               | -                               | -                            | P_trifoliata_00358_mRNA_31,1    |
| GF0048192 | 0                            | 0                         | 0                            | 1 Hypothetical protein (1)                                              |                                                                                                                                                                                                                                                                                                                                                                                                                                                               |                                                                                                                                                                                                                                                                                                                                                                                                                                                                                                               | -                               | -                            | P_trifoliata_00358_mRNA_30,1    |
| GF0048191 | 0                            | 0                         | 0                            | 1 Hypothetical protein (1)                                              |                                                                                                                                                                                                                                                                                                                                                                                                                                                               | Golgin subfamily A member 5 [IPRO19177] (1)                                                                                                                                                                                                                                                                                                                                                                                                                                                                   | -                               | -                            | P_trifoliata_00358_mRNA_3,1     |
| GF0048190 | 0                            | 0                         | 0                            | 1 Hypothetical protein (1)                                              |                                                                                                                                                                                                                                                                                                                                                                                                                                                               |                                                                                                                                                                                                                                                                                                                                                                                                                                                                                                               | -                               | -                            | P_trifoliata_00358_mRNA_29,1    |
| GF0048189 | 0                            | 0                         | 0                            | 1 Hypothetical protein (1)                                              |                                                                                                                                                                                                                                                                                                                                                                                                                                                               | NADH:quinone oxidoreductase/Mrp antiporter, membrane subunit [IPRO01750] (1)                                                                                                                                                                                                                                                                                                                                                                                                                                  | -                               | -                            | P_trifoliata_00358_mRNA_27,1    |
| GF0048188 | 0                            | 0                         | 0                            | 1 Hypothetical protein (1)                                              | proton-transporting ATP synthase complex, coupling factor F10 [GO:0045263 cellular_component] (1); proton-transporting two-sector ATPase complex, proton-transporting domain [GO:003177 cellular_component] (1); hydrogen ion transmembrane transporter activity [GO:0015078 molecular_function] (1); ATP hydrolysis coupled proton transport [GO:0015991 biological_process] (1); ATP synthesis coupled proton transport [GO:0015986 biological_process] (1) | NADH:quinone oxidoreductase/Mrp antiporter, membrane subunit [IPRO01750] (1); ATPase, F0 complex, subunit C, DCCD-binding site [IPRO02537] (1); ATPase, F0 complex, subunit C [IPRO0454] (1); V-ATPase proteolipid subunit C-like domain [IPRO02379] (1)                                                                                                                                                                                                                                                      | -                               | -                            | P_trifoliata_00358_mRNA_26,1    |
| GF0048187 | 0                            | 0                         | 0                            | 1 Hypothetical protein (1)                                              |                                                                                                                                                                                                                                                                                                                                                                                                                                                               |                                                                                                                                                                                                                                                                                                                                                                                                                                                                                                               | -                               | -                            | P_trifoliata_00358_mRNA_17,1    |
| GF0048186 | 0                            | 0                         | 0                            | 1 Hypothetical protein (1)                                              |                                                                                                                                                                                                                                                                                                                                                                                                                                                               |                                                                                                                                                                                                                                                                                                                                                                                                                                                                                                               | -                               | -                            | P_trifoliata_00358_mRNA_13,1    |
| GF0048185 | 0                            | 0                         | 0                            | 1 NBS-LRR class resistance protein Fy1-Ryl1 (1)                         | ADP binding [GO:0043531 molecular_function] (1)                                                                                                                                                                                                                                                                                                                                                                                                               | Leucine-rich repeat domain, L domain-like [IPRO32675] (1); NB-ARC [IPRO02182] (1); P-loop containing nucleoside triphosphate hydrolase [IPRO27417] (1)                                                                                                                                                                                                                                                                                                                                                        | -                               | -                            | P_trifoliata_00358_mRNA_12,1    |
| GF0048184 | 0                            | 0                         | 0                            | 1 Hypothetical protein (1)                                              | malate dehydrogenase (decarboxylating) (NADP+) activity [GO:0004471 molecular_function] (1); oxidation-reduction process [GO:0055114 biological_process] (1)                                                                                                                                                                                                                                                                                                  | Malic enzyme, N-terminal domain [IPRO12301] (1)                                                                                                                                                                                                                                                                                                                                                                                                                                                               | -                               | -                            | P_trifoliata_00358_mRNA_1,1     |
| GF0048183 | 0                            | 0                         | 0                            | 1 Hypothetical protein (1)                                              |                                                                                                                                                                                                                                                                                                                                                                                                                                                               |                                                                                                                                                                                                                                                                                                                                                                                                                                                                                                               | -                               | -                            | P_trifoliata_00357_mRNA_38,1    |
| GF0048182 | 0                            | 0                         | 0                            | 1 Hypothetical protein (1)                                              |                                                                                                                                                                                                                                                                                                                                                                                                                                                               |                                                                                                                                                                                                                                                                                                                                                                                                                                                                                                               | -                               | -                            | P_trifoliata_00357_mRNA_37,1    |
| GF0048181 | 0                            | 0                         | 0                            | 1 Hypothetical protein (1)                                              |                                                                                                                                                                                                                                                                                                                                                                                                                                                               |                                                                                                                                                                                                                                                                                                                                                                                                                                                                                                               | -                               | -                            | P_trifoliata_00357_mRNA_36,1    |
| GF0048180 | 0                            | 0                         | 0                            | 1 Hypothetical protein (1)                                              |                                                                                                                                                                                                                                                                                                                                                                                                                                                               |                                                                                                                                                                                                                                                                                                                                                                                                                                                                                                               | -                               | -                            | P_trifoliata_00357_mRNA_27,1    |
| GF0048179 | 0                            | 0                         | 0                            | 1 Hypothetical protein (1)                                              |                                                                                                                                                                                                                                                                                                                                                                                                                                                               |                                                                                                                                                                                                                                                                                                                                                                                                                                                                                                               | -                               | -                            | P_trifoliata_00357_mRNA_26,1    |
| GF0048178 | 0                            | 0                         | 0                            | 1 Hypothetical protein (1)                                              | nucleic acid binding [GO:0003676 molecular_function] (1)                                                                                                                                                                                                                                                                                                                                                                                                      | Ribonuclease H-like domain [IPRO12337] (1)                                                                                                                                                                                                                                                                                                                                                                                                                                                                    | -                               | -                            | P_trifoliata_00357_mRNA_23,1    |
| GF0048177 | 0                            | 0                         | 0                            | 1 Hypothetical protein (1)                                              |                                                                                                                                                                                                                                                                                                                                                                                                                                                               |                                                                                                                                                                                                                                                                                                                                                                                                                                                                                                               | -                               | -                            | P_trifoliata_00357_mRNA_22,1    |
| GF0048176 | 0                            | 0                         | 0                            | 1 Hypothetical protein (1)                                              |                                                                                                                                                                                                                                                                                                                                                                                                                                                               |                                                                                                                                                                                                                                                                                                                                                                                                                                                                                                               | -                               | -                            | P_trifoliata_00357_mRNA_21,1    |
| GF0048175 | 0                            | 0                         | 0                            | 1 Hypothetical protein (1)                                              |                                                                                                                                                                                                                                                                                                                                                                                                                                                               |                                                                                                                                                                                                                                                                                                                                                                                                                                                                                                               | -                               | -                            | P_trifoliata_00357_mRNA_19,1    |
| GF0048174 | 0                            | 0                         | 0                            | 1 Hypothetical protein (1)                                              |                                                                                                                                                                                                                                                                                                                                                                                                                                                               |                                                                                                                                                                                                                                                                                                                                                                                                                                                                                                               | -                               | -                            | P_trifoliata_00357_mRNA_18,1    |
| GF0048173 | 0                            | 0                         | 0                            | 1 Nucleoside diphosphate kinase (1)                                     | CTP biosynthetic process [GO:0006241 biological_process] (1); UTP biosynthetic process [GO:0006228 biological_process] (1); nucleoside diphosphate phosphorylation [GO:0006165 biological_process] (1); nucleoside diphosphate kinase activity [GO:0004550 molecular_function] (1); GTP biosynthetic process [GO:0006183 biological_process] (1)                                                                                                              | Nucleoside diphosphate kinase [IPRO01564] (1); Nucleoside diphosphate kinase, active site [IPRO23005] (1)                                                                                                                                                                                                                                                                                                                                                                                                     | -                               | -                            | P_trifoliata_00357_mRNA_14,1    |
| GF0048172 | 0                            | 0                         | 0                            | 1 Hypothetical protein (1)                                              |                                                                                                                                                                                                                                                                                                                                                                                                                                                               |                                                                                                                                                                                                                                                                                                                                                                                                                                                                                                               | -                               | -                            | P_trifoliata_00356_mRNA_26,1    |
| GF0048171 | 0                            | 0                         | 0                            | 1 Hypothetical protein (1)                                              | ADP binding [GO:0043531 molecular_function] (1)                                                                                                                                                                                                                                                                                                                                                                                                               | P-loop containing nucleoside triphosphate hydrolase [IPRO27417] (1); NB-ARC [IPRO02182] (1) SAM-dependent carbonyl methyltransferase [IPRO05299] (1); Zinc finger, CCHC-type [IPRO01878] (1); Zinc knuckle C2HC2/4HD2C [IPRO25836] (1); S-adenosyl-L-methionine-dependent methyltransferase [IPRO09063] (1); Ribonuclease H domain [IPRO02156] (1); Reverse transcriptase zinc-binding domain [IPRO26960] (1); Domain of unknown function DJF4283 [IPRO25558] (1); Ribonuclease H-like domain [IPRO17371] (1) | -                               | -                            | P_trifoliata_00356_mRNA_22,1    |
| GF0048170 | 0                            | 0                         | 0                            | 1 Non-LTR retroelement reverse transcriptase-like (1)                   | zinc ion binding [GO:0008270 molecular_function] (1); RNA-DNA hybrid ribonuclease activity [GO:0004523 molecular_function] (1); methyltransferase activity [GO:0008168 molecular_function] (1); nucleic acid binding [GO:0003676 molecular_function] (1)                                                                                                                                                                                                      | S-adenosyl-L-methionine-dependent methyltransferase [IPRO29063] (1); SAM-dependent carbonyl methyltransferase [IPRO05299] (1)                                                                                                                                                                                                                                                                                                                                                                                 | -                               | -                            | P_trifoliata_00356_mRNA_21,1    |
| GF0048169 | 0                            | 0                         | 0                            | 1 S-adenosyl-L-methionine:salicylic acid carboxyl methyltransferase (1) | methyltransferase activity [GO:0008168 molecular_function] (1)                                                                                                                                                                                                                                                                                                                                                                                                | S-adenosyl-L-methionine-dependent methyltransferase [IPRO29063] (1); SAM-dependent carbonyl methyltransferase [IPRO05299] (1)                                                                                                                                                                                                                                                                                                                                                                                 | -                               | -                            | P_trifoliata_00356_mRNA_20,1    |
| GF0048168 | 0                            | 0                         | 0                            | 1 Hypothetical protein (1)                                              |                                                                                                                                                                                                                                                                                                                                                                                                                                                               |                                                                                                                                                                                                                                                                                                                                                                                                                                                                                                               | -                               | -                            | P_trifoliata_00356_mRNA_18,1    |
| GF0048167 | 0                            | 0                         | 0                            | 1 Hypothetical protein (1)                                              |                                                                                                                                                                                                                                                                                                                                                                                                                                                               |                                                                                                                                                                                                                                                                                                                                                                                                                                                                                                               | -                               | -                            | P_trifoliata_00356_mRNA_17,1    |
| GF0048166 | 0                            | 0                         | 0                            | 1 Hypothetical protein (1)                                              |                                                                                                                                                                                                                                                                                                                                                                                                                                                               |                                                                                                                                                                                                                                                                                                                                                                                                                                                                                                               | -                               | -                            | P_trifoliata_00356_mRNA_14,1    |
| GF0048165 | 0                            | 0                         | 0                            | 1 Hypothetical protein (1)                                              | methyltransferase activity [GO:0008168 molecular_function] (1)                                                                                                                                                                                                                                                                                                                                                                                                | S-adenosyl-L-methionine-dependent methyltransferase [IPRO29063] (1); G-methyltransferase COMT-type [IPRO16461] (1)                                                                                                                                                                                                                                                                                                                                                                                            | -                               | -                            | P_trifoliata_00356_mRNA_13,1    |
| GF0048164 | 0                            | 0                         | 0                            | 1 Hypothetical protein (1)                                              | RNA-DNA hybrid ribonuclease activity [GO:0004523 molecular_function] (1); nucleic acid binding [GO:0003676 molecular_function] (1)                                                                                                                                                                                                                                                                                                                            | Ribonuclease H-like domain [IPRO12337] (1); Ribonuclease H domain [IPRO02156] (1)                                                                                                                                                                                                                                                                                                                                                                                                                             | -                               | -                            | P_trifoliata_00356_mRNA_10,1    |
| GF0048163 | 0                            | 0                         | 0                            | 1 Cytokinin riboside 5'-monophosphate phosphorylhydrolase (1)           |                                                                                                                                                                                                                                                                                                                                                                                                                                                               |                                                                                                                                                                                                                                                                                                                                                                                                                                                                                                               | -                               | -                            | P_trifoliata_00356_mRNA_1,1     |
| GF0048162 | 0                            | 0                         | 0                            | 1 Hypothetical protein (1)                                              |                                                                                                                                                                                                                                                                                                                                                                                                                                                               |                                                                                                                                                                                                                                                                                                                                                                                                                                                                                                               | -                               | -                            | P_trifoliata_00355_mRNA_9,1     |
| GF0048161 | 0                            | 0                         | 0                            | 1 Hypothetical protein (1)                                              |                                                                                                                                                                                                                                                                                                                                                                                                                                                               |                                                                                                                                                                                                                                                                                                                                                                                                                                                                                                               | -                               | -                            | P_trifoliata_00355_mRNA_2,1     |
| GF0048160 | 0                            | 0                         | 0                            | 1 Hypothetical protein (1)                                              |                                                                                                                                                                                                                                                                                                                                                                                                                                                               |                                                                                                                                                                                                                                                                                                                                                                                                                                                                                                               | -                               | -                            | P_trifoliata_00355_mRNA_19,1    |
| GF0048159 | 0                            | 0                         | 0                            | 1 Hypothetical protein (1)                                              |                                                                                                                                                                                                                                                                                                                                                                                                                                                               | Isopenicillin N synthase-like [IPRO27443] (1); Non-haem dioxygenase - N-terminal domain [IPRO26992] (1)                                                                                                                                                                                                                                                                                                                                                                                                       | -                               | -                            | P_trifoliata_00354_mRNA_9,1     |
| GF0048158 | 0                            | 0                         | 0                            | 1 Hypothetical protein (1)                                              |                                                                                                                                                                                                                                                                                                                                                                                                                                                               |                                                                                                                                                                                                                                                                                                                                                                                                                                                                                                               | -                               | -                            | P_trifoliata_00354_mRNA_8,1     |
| GF0048157 | 0                            | 0                         | 0                            | 1 Hypothetical protein (1)                                              | heme binding [GO:0020037 molecular_function] (1); response to oxidative stress [GO:0006979 biological_process] (1); oxidation-reduction process [GO:0055114 biological_process] (1); peroxidase activity [GO:0004601 molecular_function] (1)                                                                                                                                                                                                                  | Haem peroxidase [IPRO10255] (1); Haem peroxidase, plant/fungal/bacterial dependent [IPRO20163] (1); Plant peroxidase [IPRO08023] (1); Peroxidase, active site [IPRO19794] (1)                                                                                                                                                                                                                                                                                                                                 | -                               | -                            | P_trifoliata_00354_mRNA_6,1     |
| GF0048156 | 0                            | 0                         | 0                            | 1 Hypothetical protein (1)                                              |                                                                                                                                                                                                                                                                                                                                                                                                                                                               |                                                                                                                                                                                                                                                                                                                                                                                                                                                                                                               | -                               | -                            | P_trifoliata_00354_mRNA_32,1    |
| GF0048155 | 0                            | 0                         | 0                            | 1 Hypothetical protein (1)                                              |                                                                                                                                                                                                                                                                                                                                                                                                                                                               |                                                                                                                                                                                                                                                                                                                                                                                                                                                                                                               | -                               | -                            | P_trifoliata_00354_mRNA_28,1    |
| GF0048154 | 0                            | 0                         | 0                            | 1 Hypothetical protein (1)                                              |                                                                                                                                                                                                                                                                                                                                                                                                                                                               |                                                                                                                                                                                                                                                                                                                                                                                                                                                                                                               | -                               | -                            | P_trifoliata_00354_mRNA_27,1    |
| GF0048153 | 0                            | 0                         | 0                            | 1 Hypothetical protein (1)                                              |                                                                                                                                                                                                                                                                                                                                                                                                                                                               |                                                                                                                                                                                                                                                                                                                                                                                                                                                                                                               | -                               | -                            | P_trifoliata_00354_mRNA_24,1    |
| GF0048152 | 0                            | 0                         | 0                            | 1 Hypothetical protein (1)                                              |                                                                                                                                                                                                                                                                                                                                                                                                                                                               |                                                                                                                                                                                                                                                                                                                                                                                                                                                                                                               | -                               | -                            | P_trifoliata_00354_mRNA_23,1    |
| GF0048151 | 0                            | 0                         | 0                            | 1 Hypothetical protein (1)                                              |                                                                                                                                                                                                                                                                                                                                                                                                                                                               |                                                                                                                                                                                                                                                                                                                                                                                                                                                                                                               | -                               | -                            | P_trifoliata_00354_mRNA_14,1    |
| GF0048150 | 0                            | 0                         | 0                            | 1 Hypothetical protein (1)                                              |                                                                                                                                                                                                                                                                                                                                                                                                                                                               |                                                                                                                                                                                                                                                                                                                                                                                                                                                                                                               | -                               | -                            | P_trifoliata_00354_mRNA_1,1     |
| GF0048149 | 0                            | 0                         | 0                            | 1 Calcium-dependent protein kinase 29 (1)                               | ATP binding [GO:0005524 molecular_function] (1); protein kinase activity [GO:0004672 molecular_function] (1); protein phosphorylation [GO:0006468 biological_process] (1); calcium ion binding [GO:0005509 molecular_function] (1)                                                                                                                                                                                                                            | EF-hand domain pair [IPRO11992] (1); Protein kinase domain [IPRO00759] (1); Protein kinase-like domain [IPRO11009] (1); EF-hand domain [IPRO20488] (1); Serine/threonine/dual specificity protein kinase, catalytic domain [IPRO02290] (1)                                                                                                                                                                                                                                                                    | -                               | -                            | P_trifoliata_00353_mRNA_7,1     |
| GF0048148 | 0                            | 0                         | 0                            | 1 Hypothetical protein (1)                                              |                                                                                                                                                                                                                                                                                                                                                                                                                                                               |                                                                                                                                                                                                                                                                                                                                                                                                                                                                                                               | -                               | -                            | P_trifoliata_00353_mRNA_6,1     |
| GF0048147 | 0                            | 0                         | 0                            | 1 Hypothetical protein (1)                                              |                                                                                                                                                                                                                                                                                                                                                                                                                                                               |                                                                                                                                                                                                                                                                                                                                                                                                                                                                                                               | -                               | -                            | P_trifoliata_00353_mRNA_3,1     |
| GF0048146 | 0                            | 0                         | 0                            | 1 Hypothetical protein (1)                                              |                                                                                                                                                                                                                                                                                                                                                                                                                                                               |                                                                                                                                                                                                                                                                                                                                                                                                                                                                                                               | -                               | -                            | P_trifoliata_00353_mRNA_29,1    |
| GF0048145 | 0                            | 0                         | 0                            | 1 Hypothetical protein (1)                                              |                                                                                                                                                                                                                                                                                                                                                                                                                                                               |                                                                                                                                                                                                                                                                                                                                                                                                                                                                                                               | -                               | -                            | P_trifoliata_00353_mRNA_28,1    |
| GF0048144 | 0                            | 0                         | 0                            | 1 Hypothetical protein (1)                                              |                                                                                                                                                                                                                                                                                                                                                                                                                                                               |                                                                                                                                                                                                                                                                                                                                                                                                                                                                                                               | -                               | -                            | P_trifoliata_00353_mRNA_26,1    |
| GF0048143 | 0                            | 0                         | 0                            | 1 Hypothetical protein (1)                                              |                                                                                                                                                                                                                                                                                                                                                                                                                                                               |                                                                                                                                                                                                                                                                                                                                                                                                                                                                                                               | -                               | -                            | P_trifoliata_00353_mRNA_25,1    |
| GF0048142 | 0                            | 0                         | 0                            | 1 Hypothetical protein (1)                                              |                                                                                                                                                                                                                                                                                                                                                                                                                                                               |                                                                                                                                                                                                                                                                                                                                                                                                                                                                                                               | -                               | -                            | P_trifoliata_00353_mRNA_20,1    |

| ID        | Num. in <i>C. caryocarpus</i> | Num. in <i>C. umbellatus</i> | Num. in <i>P. trifoliatus</i> | Note                                                                     | GO                                                                                                                                                                                                                                                      | InterPro                                                                                                                                                                                                                                                                                                                                                 | Members in <i>C. caryocarpus</i> | Members in <i>C. umbellatus</i> | Members in <i>P. trifoliatus</i> |
|-----------|-------------------------------|------------------------------|-------------------------------|--------------------------------------------------------------------------|---------------------------------------------------------------------------------------------------------------------------------------------------------------------------------------------------------------------------------------------------------|----------------------------------------------------------------------------------------------------------------------------------------------------------------------------------------------------------------------------------------------------------------------------------------------------------------------------------------------------------|----------------------------------|---------------------------------|----------------------------------|
| GF0048141 | 0                             | 0                            | 1                             | G-type lectin S-receptor-like serine/threonine-protein kinase (1)        | ATP binding [GO:0005524 molecular_function] (1); protein kinase activity [GO:0004672 molecular_function] (1); protein serine/threonine kinase activity [GO:0004674 molecular_function] (1); protein phosphorylation [GO:0006468 biological_process] (1) | Serine-threonine/tyrosine-protein kinase catalytic domain [IPR01245] (1); S-locus receptor kinase, C-terminal [IPR021820] (1); Serine/threonine-protein kinase, active site [IPR008271] (1); Serine/threonine/tyrosine-protein kinase, catalytic domain [IPR00290] (1); Protein kinase-like domain [IPR011009] (1); Protein kinase domain [IPR00719] (1) | -                                | -                               | P_trifoliatus_00353_mRNA_19.1    |
| GF0048140 | 0                             | 0                            | 1                             | Hypothetical protein (1)                                                 | calcium ion binding [GO:0005509 molecular_function] (1)                                                                                                                                                                                                 | GAG-pre-integrase domain [IPR025724] (1)                                                                                                                                                                                                                                                                                                                 | -                                | -                               | P_trifoliatus_00353_mRNA_17.1    |
| GF0048139 | 0                             | 0                            | 1                             | Hypothetical protein (1)                                                 |                                                                                                                                                                                                                                                         | EF-hand domain [IPR02048] (1)                                                                                                                                                                                                                                                                                                                            | -                                | -                               | P_trifoliatus_00353_mRNA_11.1    |
| GF0048138 | 0                             | 0                            | 1                             | Hypothetical protein (1)                                                 |                                                                                                                                                                                                                                                         | Protein of unknown function DUF594 [IPR007658] (1)                                                                                                                                                                                                                                                                                                       | -                                | -                               | P_trifoliatus_00352_mRNA_9.1     |
| GF0048137 | 0                             | 0                            | 1                             | Hypothetical protein (1)                                                 |                                                                                                                                                                                                                                                         | Domain of unknown function DUF4220 [IPR02531] (1)                                                                                                                                                                                                                                                                                                        | -                                | -                               | P_trifoliatus_00352_mRNA_8.1     |
| GF0048136 | 0                             | 0                            | 1                             | Hypothetical protein (1)                                                 |                                                                                                                                                                                                                                                         | Leucine-rich repeat domain, L domain-like [IPR032675] (1); Leucine-rich repeat-containing N-terminal, plant-type [IPR013210] (1)                                                                                                                                                                                                                         | -                                | -                               | P_trifoliatus_00352_mRNA_6.1     |
| GF0048135 | 0                             | 0                            | 1                             | Hypothetical protein (1)                                                 | zinc ion binding [GO:0008270 molecular_function] (1); nucleic acid binding [GO:0003676 molecular_function] (1)                                                                                                                                          | Retrosposon gag domain [IPR005162] (1); Zinc finger, CCHC-type [IPR01878] (1)                                                                                                                                                                                                                                                                            | -                                | -                               | P_trifoliatus_00352_mRNA_4.1     |
| GF0048134 | 0                             | 0                            | 1                             | Hypothetical protein (1)                                                 |                                                                                                                                                                                                                                                         | Harbinger transposase-derived nuclease domain [IPR027806] (1)                                                                                                                                                                                                                                                                                            | -                                | -                               | P_trifoliatus_00352_mRNA_27.1    |
| GF0048133 | 0                             | 0                            | 1                             | Hypothetical protein (1)                                                 |                                                                                                                                                                                                                                                         |                                                                                                                                                                                                                                                                                                                                                          | -                                | -                               | P_trifoliatus_00352_mRNA_26.1    |
| GF0048132 | 0                             | 0                            | 1                             | Hypothetical protein (1)                                                 | zinc ion binding [GO:0008270 molecular_function] (1); nucleic acid binding [GO:0003676 molecular_function] (1)                                                                                                                                          | Zinc finger, CCHC-type [IPR01878] (1)                                                                                                                                                                                                                                                                                                                    | -                                | -                               | P_trifoliatus_00352_mRNA_25.1    |
| GF0048131 | 0                             | 0                            | 1                             | Limonene synthase (1)                                                    | metabolic process [GO:0008152 biological_process] (1); magnesium ion binding [GO:0000287 molecular_function] (1); lyase activity [GO:0016829 molecular_function] (1); terpene synthase activity [GO:0010333 molecular_function] (1)                     | Terpene synthase, N-terminal domain [IPR01906] (1); Terpene synthase, metal-binding domain [IPR005630] (1); Terpenoid cyclases/protein prenyltransferase alpha-alpha toroid [IPR008930] (1); Isoprenoid synthase domain [IPR00949] (1)                                                                                                                   | -                                | -                               | P_trifoliatus_00352_mRNA_22.1    |
| GF0048130 | 0                             | 0                            | 1                             | Hypothetical protein (1)                                                 |                                                                                                                                                                                                                                                         | Domain of unknown function DUF4220 [IPR02531] (1)                                                                                                                                                                                                                                                                                                        | -                                | -                               | P_trifoliatus_00352_mRNA_2.1     |
| GF0048129 | 0                             | 0                            | 1                             | Hypothetical protein (1)                                                 |                                                                                                                                                                                                                                                         |                                                                                                                                                                                                                                                                                                                                                          | -                                | -                               | P_trifoliatus_00352_mRNA_11.1    |
| GF0048128 | 0                             | 0                            | 1                             | Hypothetical protein (1)                                                 |                                                                                                                                                                                                                                                         |                                                                                                                                                                                                                                                                                                                                                          | -                                | -                               | P_trifoliatus_00351_mRNA_25.1    |
| GF0048127 | 0                             | 0                            | 1                             | Hypothetical protein (1)                                                 |                                                                                                                                                                                                                                                         |                                                                                                                                                                                                                                                                                                                                                          | -                                | -                               | P_trifoliatus_00351_mRNA_24.1    |
| GF0048126 | 0                             | 0                            | 1                             | Hypothetical protein (1)                                                 |                                                                                                                                                                                                                                                         |                                                                                                                                                                                                                                                                                                                                                          | -                                | -                               | P_trifoliatus_00351_mRNA_21.1    |
| GF0048125 | 0                             | 0                            | 1                             | Hypothetical protein (1)                                                 | oxidation-reduction process [GO:005114 biological_process] (1); oxidoreductase activity [GO:0016491 molecular_function] (1); copper ion binding [GO:0005507 molecular_function] (1)                                                                     | Multicopper oxidase, type 2 [IPR011706] (1); Cuprodoxin [IPR009972] (1)                                                                                                                                                                                                                                                                                  | -                                | -                               | P_trifoliatus_00351_mRNA_19.1    |
| GF0048124 | 0                             | 0                            | 1                             | Putative disease resistance protein RGA1 (1)                             | ADP binding [GO:0043531 molecular_function] (1)                                                                                                                                                                                                         | P-loop containing nucleoside triphosphate hydrolase [IPR027417] (1); NB-ARC [IPR002182] (1)                                                                                                                                                                                                                                                              | -                                | -                               | P_trifoliatus_00351_mRNA_12.1    |
| GF0048123 | 0                             | 0                            | 1                             | Putative disease resistance protein (1)                                  | inositol-3-phosphate synthase activity [GO:0004512 molecular_function] (1); isoprenoid biosynthetic process [GO:0006021 biological_process] (1); phospholipid biosynthetic process [GO:0006654 biological_process] (1)                                  | Leucine-rich repeat domain, L domain-like [IPR032675] (1); Myo-inositol-1-phosphate synthase [IPR00287] (1); NAD(P)-binding domain [IPR016940] (1)                                                                                                                                                                                                       | -                                | -                               | P_trifoliatus_00351_mRNA_11.1    |
| GF0048122 | 0                             | 0                            | 1                             | Hypothetical protein (1)                                                 |                                                                                                                                                                                                                                                         | Leucine-rich repeat domain, L domain-like [IPR032675] (1)                                                                                                                                                                                                                                                                                                | -                                | -                               | P_trifoliatus_00351_mRNA_10.1    |
| GF0048121 | 0                             | 0                            | 1                             | Hypothetical protein (1)                                                 |                                                                                                                                                                                                                                                         |                                                                                                                                                                                                                                                                                                                                                          | -                                | -                               | P_trifoliatus_00350_mRNA_8.1     |
| GF0048120 | 0                             | 0                            | 1                             | Carboxyesterase 18, putative (1)                                         | hydrolase activity [GO:0016787 molecular_function] (1); metabolic process [GO:0008152 biological_process] (1)                                                                                                                                           | Alpha/beta hydrolase fold-3 [IPR013094] (1); Alpha/beta hydrolase fold [IPR00955] (1)                                                                                                                                                                                                                                                                    | -                                | -                               | P_trifoliatus_00350_mRNA_7.1     |
| GF0048119 | 0                             | 0                            | 1                             | Hypothetical protein (1)                                                 | protein binding [GO:0005515 molecular_function] (1); ADP binding [GO:0043531 molecular_function] (1); signal transduction [GO:0007165 biological_process] (1)                                                                                           | Toll/interleukin-1 receptor homology (TIR) domain [IPR00157] (1); Leucine-rich repeat 3 [IPR011713] (1); P-loop containing nucleoside triphosphate hydrolase [IPR027417] (1); NB-ARC [IPR002182] (1)                                                                                                                                                     | -                                | -                               | P_trifoliatus_00350_mRNA_4.1     |
| GF0048118 | 0                             | 0                            | 1                             | Hypothetical protein (1)                                                 |                                                                                                                                                                                                                                                         |                                                                                                                                                                                                                                                                                                                                                          | -                                | -                               | P_trifoliatus_00350_mRNA_25.1    |
| GF0048117 | 0                             | 0                            | 1                             | Hypothetical protein (1)                                                 |                                                                                                                                                                                                                                                         |                                                                                                                                                                                                                                                                                                                                                          | -                                | -                               | P_trifoliatus_00350_mRNA_24.1    |
| GF0048116 | 0                             | 0                            | 1                             | Hypothetical protein (1)                                                 |                                                                                                                                                                                                                                                         | PH domain-like [IPR011993] (1); P-loop containing nucleoside triphosphate hydrolase [IPR027417] (1); Pleckstrin homology domain [IPR01849] (1); Dynamins superfamily [IPR022812] (1); Hexapeptide repeat [IPR001451] (1); Trimeric Lys-A-like [IPR011004] (1); Hexapeptide transferase, conserved site [IPR018357] (1)                                   | -                                | -                               | P_trifoliatus_00350_mRNA_2.1     |
| GF0048115 | 0                             | 0                            | 1                             | Serine acetyltransferase 4 (1)                                           | transferase activity [GO:0016740 molecular_function] (1)                                                                                                                                                                                                | Aspartic peptidase domain [IPR021109] (1)                                                                                                                                                                                                                                                                                                                | -                                | -                               | P_trifoliatus_00350_mRNA_18.1    |
| GF0048114 | 0                             | 0                            | 1                             | Hypothetical protein (1)                                                 |                                                                                                                                                                                                                                                         |                                                                                                                                                                                                                                                                                                                                                          | -                                | -                               | P_trifoliatus_00350_mRNA_17.1    |
| GF0048113 | 0                             | 0                            | 1                             | Hypothetical protein (1)                                                 |                                                                                                                                                                                                                                                         |                                                                                                                                                                                                                                                                                                                                                          | -                                | -                               | P_trifoliatus_00350_mRNA_15.1    |
| GF0048112 | 0                             | 0                            | 1                             | Hypothetical protein (1)                                                 |                                                                                                                                                                                                                                                         |                                                                                                                                                                                                                                                                                                                                                          | -                                | -                               | P_trifoliatus_00350_mRNA_14.1    |
| GF0048111 | 0                             | 0                            | 1                             | Hypothetical protein (1)                                                 |                                                                                                                                                                                                                                                         |                                                                                                                                                                                                                                                                                                                                                          | -                                | -                               | P_trifoliatus_00350_mRNA_13.1    |
| GF0048110 | 0                             | 0                            | 1                             | Hypothetical protein (1)                                                 | GTP binding [GO:0005525 molecular_function] (1); GTPase activity [GO:0003924 molecular_function] (1)                                                                                                                                                    | GTPase effector domain [IPR020850] (1); Dynamins superfamily [IPR003130] (1); Dynamins superfamily [IPR022812] (1)                                                                                                                                                                                                                                       | -                                | -                               | P_trifoliatus_00350_mRNA_1.1     |
| GF0048109 | 0                             | 0                            | 1                             | Hypothetical protein (1)                                                 |                                                                                                                                                                                                                                                         |                                                                                                                                                                                                                                                                                                                                                          | -                                | -                               | P_trifoliatus_00349_mRNA_9.1     |
| GF0048108 | 0                             | 0                            | 1                             | Hypothetical protein (1)                                                 |                                                                                                                                                                                                                                                         |                                                                                                                                                                                                                                                                                                                                                          | -                                | -                               | P_trifoliatus_00349_mRNA_6.1     |
| GF0048107 | 0                             | 0                            | 1                             | Hypothetical protein (1)                                                 |                                                                                                                                                                                                                                                         |                                                                                                                                                                                                                                                                                                                                                          | -                                | -                               | P_trifoliatus_00349_mRNA_4.1     |
| GF0048106 | 0                             | 0                            | 1                             | Hypothetical protein (1)                                                 | regulation of transcription, DNA-templated [GO:0006355 biological_process] (1); transcription factor activity, sequence-specific DNA binding [GO:0003700 molecular_function] (1); DNA binding [GO:0003677 molecular_function] (1)                       | AP2/ERF domain [IPR001471] (1); DNA-binding domain [IPR016177] (1)                                                                                                                                                                                                                                                                                       | -                                | -                               | P_trifoliatus_00349_mRNA_38.1    |
| GF0048105 | 0                             | 0                            | 1                             | Hypothetical protein (1)                                                 |                                                                                                                                                                                                                                                         |                                                                                                                                                                                                                                                                                                                                                          | -                                | -                               | P_trifoliatus_00349_mRNA_37.1    |
| GF0048104 | 0                             | 0                            | 1                             | Hypothetical protein (1)                                                 |                                                                                                                                                                                                                                                         |                                                                                                                                                                                                                                                                                                                                                          | -                                | -                               | P_trifoliatus_00349_mRNA_36.1    |
| GF0048103 | 0                             | 0                            | 1                             | Hypothetical protein (1)                                                 |                                                                                                                                                                                                                                                         |                                                                                                                                                                                                                                                                                                                                                          | -                                | -                               | P_trifoliatus_00349_mRNA_34.1    |
| GF0048102 | 0                             | 0                            | 1                             | Hypothetical protein (1)                                                 |                                                                                                                                                                                                                                                         |                                                                                                                                                                                                                                                                                                                                                          | -                                | -                               | P_trifoliatus_00349_mRNA_3.1     |
| GF0048101 | 0                             | 0                            | 1                             | Hypothetical protein (1)                                                 | proteolysis [GO:0006508 biological_process] (1); cysteine-type peptidase activity [GO:0008234 molecular_function] (1)                                                                                                                                   | Ulp1 protease family, C-terminal catalytic domain [IPR003653] (1)                                                                                                                                                                                                                                                                                        | -                                | -                               | P_trifoliatus_00349_mRNA_26.1    |
| GF0048100 | 0                             | 0                            | 1                             | Hypothetical protein (1)                                                 |                                                                                                                                                                                                                                                         | MULE transposase domain [IPR018289] (1); Transposase, Mu/DK, plant [IPR004332] (1)                                                                                                                                                                                                                                                                       | -                                | -                               | P_trifoliatus_00349_mRNA_24.1    |
| GF0048099 | 0                             | 0                            | 1                             | Hypothetical protein (1)                                                 |                                                                                                                                                                                                                                                         |                                                                                                                                                                                                                                                                                                                                                          | -                                | -                               | P_trifoliatus_00349_mRNA_23.1    |
| GF0048098 | 0                             | 0                            | 1                             | Hypothetical protein (1)                                                 |                                                                                                                                                                                                                                                         |                                                                                                                                                                                                                                                                                                                                                          | -                                | -                               | P_trifoliatus_00349_mRNA_21.1    |
| GF0048097 | 0                             | 0                            | 1                             | Hypothetical protein (1)                                                 |                                                                                                                                                                                                                                                         |                                                                                                                                                                                                                                                                                                                                                          | -                                | -                               | P_trifoliatus_00349_mRNA_2.1     |
| GF0048096 | 0                             | 0                            | 1                             | Hypothetical protein (1)                                                 |                                                                                                                                                                                                                                                         |                                                                                                                                                                                                                                                                                                                                                          | -                                | -                               | P_trifoliatus_00349_mRNA_18.1    |
| GF0048095 | 0                             | 0                            | 1                             | Hypothetical protein (1)                                                 |                                                                                                                                                                                                                                                         |                                                                                                                                                                                                                                                                                                                                                          | -                                | -                               | P_trifoliatus_00349_mRNA_17.1    |
| GF0048094 | 0                             | 0                            | 1                             | Hypothetical protein (1)                                                 |                                                                                                                                                                                                                                                         |                                                                                                                                                                                                                                                                                                                                                          | -                                | -                               | P_trifoliatus_00349_mRNA_16.1    |
| GF0048093 | 0                             | 0                            | 1                             | Hypothetical protein (1)                                                 |                                                                                                                                                                                                                                                         |                                                                                                                                                                                                                                                                                                                                                          | -                                | -                               | P_trifoliatus_00349_mRNA_15.1    |
| GF0048092 | 0                             | 0                            | 1                             | Hypothetical protein (1)                                                 | aspartic-type endopeptidase activity [GO:0004190 molecular_function] (1); proteolysis [GO:0006508 biological_process] (1)                                                                                                                               | Aspartic peptidase, active site [IPR01969] (1)                                                                                                                                                                                                                                                                                                           | -                                | -                               | P_trifoliatus_00349_mRNA_13.1    |
| GF0048091 | 0                             | 0                            | 1                             | Hypothetical protein (1)                                                 | nucleic acid binding [GO:0003676 molecular_function] (1); zinc ion binding [GO:0008270 molecular_function] (1)                                                                                                                                          | Zinc finger, CCHC-type [IPR01878] (1)                                                                                                                                                                                                                                                                                                                    | -                                | -                               | P_trifoliatus_00349_mRNA_11.1    |
| GF0048090 | 0                             | 0                            | 1                             | Hypothetical protein (1)                                                 |                                                                                                                                                                                                                                                         |                                                                                                                                                                                                                                                                                                                                                          | -                                | -                               | P_trifoliatus_00349_mRNA_10.1    |
| GF0048089 | 0                             | 0                            | 1                             | Regulator of chromosome condensation (RCC1) family protein isoform 2 (1) |                                                                                                                                                                                                                                                         | Regulator of chromosome condensation 1 beta-lactamase-inhibitor protein II [IPR009091] (1); Regulator of chromosome condensation, RCC1 [IPR004008] (1)                                                                                                                                                                                                   | -                                | -                               | P_trifoliatus_00349_mRNA_1.1     |
| GF0048088 | 0                             | 0                            | 1                             | Hypothetical protein (1)                                                 |                                                                                                                                                                                                                                                         |                                                                                                                                                                                                                                                                                                                                                          | -                                | -                               | P_trifoliatus_00348_mRNA_5.1     |
| GF0048087 | 0                             | 0                            | 1                             | Hypothetical protein (1)                                                 |                                                                                                                                                                                                                                                         |                                                                                                                                                                                                                                                                                                                                                          | -                                | -                               | P_trifoliatus_00348_mRNA_3.1     |
| GF0048086 | 0                             | 0                            | 1                             | Hypothetical protein (1)                                                 |                                                                                                                                                                                                                                                         | Retrosposon gag domain [IPR005162] (1)                                                                                                                                                                                                                                                                                                                   | -                                | -                               | P_trifoliatus_00348_mRNA_18.1    |
| GF0048085 | 0                             | 0                            | 1                             | Hypothetical protein (1)                                                 |                                                                                                                                                                                                                                                         | Vsp4 oligomerization, C-terminal [IPR01541] (1)                                                                                                                                                                                                                                                                                                          | -                                | -                               | P_trifoliatus_00348_mRNA_12.1    |
| GF0048084 | 0                             | 0                            | 1                             | Early nodulin-like protein 18 (1)                                        | electron carrier activity [GO:0009055 molecular_function] (1)                                                                                                                                                                                           | Phytoxyanin domain [IPR003245] (1); Cupredoxin [IPR008972] (1)                                                                                                                                                                                                                                                                                           | -                                | -                               | P_trifoliatus_00347_mRNA_37.1    |
| GF0048083 | 0                             | 0                            | 1                             | Hypothetical protein (1)                                                 |                                                                                                                                                                                                                                                         |                                                                                                                                                                                                                                                                                                                                                          | -                                | -                               | P_trifoliatus_00347_mRNA_29.1    |
| GF0048082 | 0                             | 0                            | 1                             | Hypothetical protein (1)                                                 |                                                                                                                                                                                                                                                         | Penetrating-peptide repeat [IPR002885] (1)                                                                                                                                                                                                                                                                                                               | -                                | -                               | P_trifoliatus_00347_mRNA_28.1    |
| GF0048081 | 0                             | 0                            | 1                             | Hypothetical protein (1)                                                 |                                                                                                                                                                                                                                                         | PPC domain [IPR005175] (1)                                                                                                                                                                                                                                                                                                                               | -                                | -                               | P_trifoliatus_00347_mRNA_12.1    |
| GF0048080 | 0                             | 0                            | 1                             | Hypothetical protein (1)                                                 | sequence-specific DNA binding [GO:0043565 molecular_function] (1)                                                                                                                                                                                       | Translin [IPR002848] (1); Translin, C-terminal [IPR016069] (1)                                                                                                                                                                                                                                                                                           | -                                | -                               | P_trifoliatus_00346_mRNA_9.1     |
| GF0048079 | 0                             | 0                            | 1                             | Hypothetical protein (1)                                                 |                                                                                                                                                                                                                                                         |                                                                                                                                                                                                                                                                                                                                                          | -                                | -                               | P_trifoliatus_00346_mRNA_32.1    |

| ID        | Num. in <i>C. clementiae</i> | Num. in <i>C. canihii</i> | Num. in <i>P. trifoliata</i> | Note                                                                 | GO                                                                                                                                                                                                                                                                                                                                                                                                                               | InterPro                                                                                                                                                                                                                                                                                                                               | Members in <i>C. clementiae</i> | Members in <i>C. canihii</i> | Members in <i>P. trifoliata</i> |
|-----------|------------------------------|---------------------------|------------------------------|----------------------------------------------------------------------|----------------------------------------------------------------------------------------------------------------------------------------------------------------------------------------------------------------------------------------------------------------------------------------------------------------------------------------------------------------------------------------------------------------------------------|----------------------------------------------------------------------------------------------------------------------------------------------------------------------------------------------------------------------------------------------------------------------------------------------------------------------------------------|---------------------------------|------------------------------|---------------------------------|
| GF0048078 | 0                            | 0                         | 1                            | Hypothetical protein (1)                                             |                                                                                                                                                                                                                                                                                                                                                                                                                                  |                                                                                                                                                                                                                                                                                                                                        | -                               | -                            | P_trifoliata_00346_mRNA_31.1    |
| GF0048077 | 0                            | 0                         | 1                            | Hypothetical protein (1)                                             |                                                                                                                                                                                                                                                                                                                                                                                                                                  |                                                                                                                                                                                                                                                                                                                                        | -                               | -                            | P_trifoliata_00346_mRNA_3.1     |
| GF0048076 | 0                            | 0                         | 1                            | Hypothetical protein (1)                                             |                                                                                                                                                                                                                                                                                                                                                                                                                                  |                                                                                                                                                                                                                                                                                                                                        | -                               | -                            | P_trifoliata_00346_mRNA_27.1    |
| GF0048075 | 0                            | 0                         | 1                            | Hypothetical protein (1)                                             |                                                                                                                                                                                                                                                                                                                                                                                                                                  |                                                                                                                                                                                                                                                                                                                                        | -                               | -                            | P_trifoliata_00346_mRNA_26.1    |
| GF0048074 | 0                            | 0                         | 1                            | Hypothetical protein (1)                                             |                                                                                                                                                                                                                                                                                                                                                                                                                                  | Transposon, En/Spm-like [IPR004242] (1)                                                                                                                                                                                                                                                                                                | -                               | -                            | P_trifoliata_00346_mRNA_23.1    |
| GF0048073 | 0                            | 0                         | 1                            | Protein LTV1 like (1)                                                |                                                                                                                                                                                                                                                                                                                                                                                                                                  | Low temperature viability protein [IPR007307] (1)                                                                                                                                                                                                                                                                                      | -                               | -                            | P_trifoliata_00346_mRNA_22.1    |
| GF0048072 | 0                            | 0                         | 1                            | Hypothetical protein (1)                                             |                                                                                                                                                                                                                                                                                                                                                                                                                                  |                                                                                                                                                                                                                                                                                                                                        | -                               | -                            | P_trifoliata_00346_mRNA_20.1    |
| GF0048071 | 0                            | 0                         | 1                            | Hypothetical protein (1)                                             |                                                                                                                                                                                                                                                                                                                                                                                                                                  |                                                                                                                                                                                                                                                                                                                                        | -                               | -                            | P_trifoliata_00346_mRNA_19.1    |
| GF0048070 | 0                            | 0                         | 1                            | Hypothetical protein (1)                                             |                                                                                                                                                                                                                                                                                                                                                                                                                                  |                                                                                                                                                                                                                                                                                                                                        | -                               | -                            | P_trifoliata_00346_mRNA_18.1    |
| GF0048069 | 0                            | 0                         | 1                            | Hypothetical protein (1)                                             |                                                                                                                                                                                                                                                                                                                                                                                                                                  |                                                                                                                                                                                                                                                                                                                                        | -                               | -                            | P_trifoliata_00346_mRNA_17.1    |
| GF0048068 | 0                            | 0                         | 1                            | Hypothetical protein (1)                                             |                                                                                                                                                                                                                                                                                                                                                                                                                                  |                                                                                                                                                                                                                                                                                                                                        | -                               | -                            | P_trifoliata_00346_mRNA_12.1    |
| GF0048067 | 0                            | 0                         | 1                            | Hypothetical protein (1)                                             |                                                                                                                                                                                                                                                                                                                                                                                                                                  |                                                                                                                                                                                                                                                                                                                                        | -                               | -                            | P_trifoliata_00345_mRNA_6.1     |
| GF0048066 | 0                            | 0                         | 1                            | Hypothetical protein (1)                                             |                                                                                                                                                                                                                                                                                                                                                                                                                                  |                                                                                                                                                                                                                                                                                                                                        | -                               | -                            | P_trifoliata_00345_mRNA_5.1     |
| GF0048065 | 0                            | 0                         | 1                            | Hypothetical protein (1)                                             |                                                                                                                                                                                                                                                                                                                                                                                                                                  |                                                                                                                                                                                                                                                                                                                                        | -                               | -                            | P_trifoliata_00345_mRNA_26.1    |
| GF0048064 | 0                            | 0                         | 1                            | Hypothetical protein (1)                                             |                                                                                                                                                                                                                                                                                                                                                                                                                                  |                                                                                                                                                                                                                                                                                                                                        | -                               | -                            | P_trifoliata_00345_mRNA_24.1    |
| GF0048063 | 0                            | 0                         | 1                            | Hypothetical protein (1)                                             |                                                                                                                                                                                                                                                                                                                                                                                                                                  |                                                                                                                                                                                                                                                                                                                                        | -                               | -                            | P_trifoliata_00345_mRNA_2.1     |
| GF0048062 | 0                            | 0                         | 1                            | Hypothetical protein (1)                                             |                                                                                                                                                                                                                                                                                                                                                                                                                                  | Chromo/chromo shadow domain [IPR009553] (1); Chromo domain [IPR023780] (1); Chromo domain-like [IPR016197] (1)                                                                                                                                                                                                                         | -                               | -                            | P_trifoliata_00345_mRNA_19.1    |
| GF0048061 | 0                            | 0                         | 1                            | Hypothetical protein (1)                                             |                                                                                                                                                                                                                                                                                                                                                                                                                                  |                                                                                                                                                                                                                                                                                                                                        | -                               | -                            | P_trifoliata_00345_mRNA_17.1    |
| GF0048060 | 0                            | 0                         | 1                            | Hypothetical protein (1)                                             |                                                                                                                                                                                                                                                                                                                                                                                                                                  |                                                                                                                                                                                                                                                                                                                                        | -                               | -                            | P_trifoliata_00345_mRNA_13.1    |
| GF0048059 | 0                            | 0                         | 1                            | Stearoyl-acyl carrier protein desaturase (1)                         | oxidation-reduction process [GO:005114 biological_process] (1); oxidoreductase activity [GO:001691 molecular_function] (1); acyl-[acyl-carrier-protein] desaturase activity [GO:0045300 molecular_function] (1); fatty acid biosynthetic process [GO:0006633 biological_process] (1); fatty acid metabolic process [GO:0006631 biological_process] (1)                                                                           | Ribonucleotide reductase-related [IPR012348] (1); Ferritin-like superfamily [IPR009781] (1); Fatty acid desaturase, type 2 [IPR005067] (1); Stearoyl-ACP desaturase, conserved site [IPR005803] (1)                                                                                                                                    | -                               | -                            | P_trifoliata_00345_mRNA_11.1    |
| GF0048058 | 0                            | 0                         | 1                            | Hypothetical protein (1)                                             |                                                                                                                                                                                                                                                                                                                                                                                                                                  |                                                                                                                                                                                                                                                                                                                                        | -                               | -                            | P_trifoliata_00344_mRNA_7.1     |
| GF0048057 | 0                            | 0                         | 1                            | Hypothetical protein (1)                                             |                                                                                                                                                                                                                                                                                                                                                                                                                                  | Pentatricopeptide repeat [IPR002885] (1)                                                                                                                                                                                                                                                                                               | -                               | -                            | P_trifoliata_00344_mRNA_30.1    |
| GF0048056 | 0                            | 0                         | 1                            | Hypothetical protein (1)                                             |                                                                                                                                                                                                                                                                                                                                                                                                                                  |                                                                                                                                                                                                                                                                                                                                        | -                               | -                            | P_trifoliata_00344_mRNA_29.1    |
| GF0048055 | 0                            | 0                         | 1                            | Hypothetical protein (1)                                             |                                                                                                                                                                                                                                                                                                                                                                                                                                  |                                                                                                                                                                                                                                                                                                                                        | -                               | -                            | P_trifoliata_00344_mRNA_28.1    |
| GF0048054 | 0                            | 0                         | 1                            | Hypothetical protein (1)                                             |                                                                                                                                                                                                                                                                                                                                                                                                                                  | Pentatricopeptide repeat [IPR002885] (1)                                                                                                                                                                                                                                                                                               | -                               | -                            | P_trifoliata_00344_mRNA_2.1     |
| GF0048053 | 0                            | 0                         | 1                            | Hypothetical protein (1)                                             | nucleic acid binding [GO:0003676 molecular_function] (1); protein dimerization activity [GO:0046983 molecular_function] (1); acid phosphatase activity [GO:0003093 molecular_function] (1); hydrolase activity [GO:0016787 molecular_function] (1); metal ion binding [GO:0046872 molecular_function] (1)                                                                                                                        | Purple acid phosphatase-like, N-terminal [IPR008963] (1); Calcineurin-like phosphoesterase domain, ap41 type [IPR004844] (1); HAT, C-terminal dimerization domain [IPR009096] (1); Metallo-dependent phosphatase-like [IPR020952] (1); Purple acid phosphatase, N-terminal [IPR015914] (1); Ribonuclease H-like domain [IPR012337] (1) | -                               | -                            | P_trifoliata_00344_mRNA_16.1    |
| GF0048052 | 0                            | 0                         | 1                            | Hypothetical protein (1)                                             |                                                                                                                                                                                                                                                                                                                                                                                                                                  |                                                                                                                                                                                                                                                                                                                                        | -                               | -                            | P_trifoliata_00344_mRNA_13.1    |
| GF0048051 | 0                            | 0                         | 1                            | Hypothetical protein (1)                                             |                                                                                                                                                                                                                                                                                                                                                                                                                                  |                                                                                                                                                                                                                                                                                                                                        | -                               | -                            | P_trifoliata_00344_mRNA_1.1     |
| GF0048050 | 0                            | 0                         | 1                            | Hypothetical protein (1)                                             |                                                                                                                                                                                                                                                                                                                                                                                                                                  |                                                                                                                                                                                                                                                                                                                                        | -                               | -                            | P_trifoliata_00343_mRNA_5.1     |
| GF0048049 | 0                            | 0                         | 1                            | Hypothetical protein (1)                                             | hydrolase activity, hydrolyzing O-glycosyl compounds [GO:0004553 molecular_function] (1); carbohydrate metabolic process [GO:0005975 biological_process] (1); electron transport chain [GO:0022900 biological_process] (1); iron-sulfur cluster binding [GO:0051536 molecular_function] (1); electron carrier activity [GO:0009055 molecular_function] (1); 2 iron, 2 sulfur cluster binding [GO:0051537 molecular_function] (1) | Glycoside hydrolase family 1 [IPR001360] (1); Glycoside hydrolase, catalytic domain [IPR013781] (1); Glycoside hydrolase superfamily [IPR017853] (1)                                                                                                                                                                                   | -                               | -                            | P_trifoliata_00343_mRNA_3.1     |
| GF0048048 | 0                            | 0                         | 1                            | Ferredoxin (1)                                                       |                                                                                                                                                                                                                                                                                                                                                                                                                                  | Ferredoxin [2Fe-2S] (1); 2Fe-2S ferredoxin, iron-sulfur binding site [IPR006055] (1); 2Fe-2S ferredoxin-type iron-sulfur binding domain [IPR001041] (1); Beta-grasp domain [IPR012675] (1); plant [IPR010241] (1)                                                                                                                      | -                               | -                            | P_trifoliata_00343_mRNA_29.1    |
| GF0048047 | 0                            | 0                         | 1                            | Hypothetical protein (1)                                             |                                                                                                                                                                                                                                                                                                                                                                                                                                  |                                                                                                                                                                                                                                                                                                                                        | -                               | -                            | P_trifoliata_00343_mRNA_22.1    |
| GF0048046 | 0                            | 0                         | 1                            | Hypothetical protein (1)                                             |                                                                                                                                                                                                                                                                                                                                                                                                                                  |                                                                                                                                                                                                                                                                                                                                        | -                               | -                            | P_trifoliata_00343_mRNA_2.1     |
| GF0048045 | 0                            | 0                         | 1                            | Hypothetical protein (1)                                             |                                                                                                                                                                                                                                                                                                                                                                                                                                  |                                                                                                                                                                                                                                                                                                                                        | -                               | -                            | P_trifoliata_00343_mRNA_13.1    |
| GF0048044 | 0                            | 0                         | 1                            | Hypothetical protein (1)                                             |                                                                                                                                                                                                                                                                                                                                                                                                                                  |                                                                                                                                                                                                                                                                                                                                        | -                               | -                            | P_trifoliata_00343_mRNA_12.1    |
| GF0048043 | 0                            | 0                         | 1                            | Hypothetical protein (1)                                             |                                                                                                                                                                                                                                                                                                                                                                                                                                  |                                                                                                                                                                                                                                                                                                                                        | -                               | -                            | P_trifoliata_00343_mRNA_11.1    |
| GF0048042 | 0                            | 0                         | 1                            | Hypothetical protein (1)                                             |                                                                                                                                                                                                                                                                                                                                                                                                                                  |                                                                                                                                                                                                                                                                                                                                        | -                               | -                            | P_trifoliata_00343_mRNA_10.1    |
| GF0048041 | 0                            | 0                         | 1                            | Peroxisomal biogenesis factor 11 family protein (1)                  | peroxisome fusion [GO:0016559 biological_process] (1); integral component of peroxisomal membrane [GO:0005779 cellular_component] (1); transmembrane transporter activity [GO:0022857 molecular_function] (1); integral component of membrane [GO:0016021 cellular_component] (1); transmembrane transport [GO:0055085 biological_process] (1); transporter activity [GO:0005215 molecular_function] (1)                         | Peroxisomal biogenesis factor 11 [IPR008733] (1)                                                                                                                                                                                                                                                                                       | -                               | -                            | P_trifoliata_00343_mRNA_1.1     |
| GF0048040 | 0                            | 0                         | 1                            | Hypothetical protein (1)                                             |                                                                                                                                                                                                                                                                                                                                                                                                                                  | Sugar transporter, conserved site [IPR005829] (1); Major facilitator superfamily domain [IPR020846] (1); Major facilitator, sugar transporter-like [IPR005828] (1)                                                                                                                                                                     | -                               | -                            | P_trifoliata_00342_mRNA_1.1     |
| GF0048039 | 0                            | 0                         | 1                            | Hypothetical protein (1)                                             | nucleic acid binding [GO:0003676 molecular_function] (1); zinc ion binding [GO:0008270 molecular_function] (1); GPI-anchor transamidase complex [GO:0042765 cellular_component] (1); GPI-anchor transamidase activity [GO:0003923 molecular_function] (1)                                                                                                                                                                        | Zinc finger, CCHC-type [IPR001878] (1)                                                                                                                                                                                                                                                                                                 | -                               | -                            | P_trifoliata_00341_mRNA_7.1     |
| GF0048038 | 0                            | 0                         | 1                            | GPI-anchor transamidase (1)                                          | attachment of GPI anchor to protein [GO:0016235 biological_process] (1); proteolysis [GO:0006908 biological_process] (1); peptidase activity [GO:0008233 molecular_function] (1); RNA binding [GO:0003723 molecular_function] (1); ribonuclease T2 activity [GO:0003997 molecular_function] (1)                                                                                                                                  | GPI-anchor transamidase [IPR028361] (1); Peptidase C13, legumain [IPR001096] (1)                                                                                                                                                                                                                                                       | -                               | -                            | P_trifoliata_00341_mRNA_3.1     |
| GF0048037 | 0                            | 0                         | 1                            | Hypothetical protein (1)                                             |                                                                                                                                                                                                                                                                                                                                                                                                                                  | Ribonuclease T2-like [IPR001568] (1)                                                                                                                                                                                                                                                                                                   | -                               | -                            | P_trifoliata_00341_mRNA_28.1    |
| GF0048036 | 0                            | 0                         | 1                            | Hypothetical protein (1)                                             |                                                                                                                                                                                                                                                                                                                                                                                                                                  |                                                                                                                                                                                                                                                                                                                                        | -                               | -                            | P_trifoliata_00341_mRNA_27.1    |
| GF0048035 | 0                            | 0                         | 1                            | Hypothetical protein (1)                                             |                                                                                                                                                                                                                                                                                                                                                                                                                                  | Reverse transcriptase domain [IPR006477] (1)                                                                                                                                                                                                                                                                                           | -                               | -                            | P_trifoliata_00341_mRNA_24.1    |
| GF0048034 | 0                            | 0                         | 1                            | Hypothetical protein (1)                                             |                                                                                                                                                                                                                                                                                                                                                                                                                                  |                                                                                                                                                                                                                                                                                                                                        | -                               | -                            | P_trifoliata_00341_mRNA_23.1    |
| GF0048033 | 0                            | 0                         | 1                            | Putative disease resistance gene NBS-LRR family protein (1)          | ADP binding [GO:0043531 molecular_function] (1)                                                                                                                                                                                                                                                                                                                                                                                  | NB-ARC [IPR002182] (1); P-loop containing nucleoside triphosphate hydrolase [IPR027417] (1); Leucine-rich repeat domain, L domain-like [IPR032675] (1)                                                                                                                                                                                 | -                               | -                            | P_trifoliata_00341_mRNA_22.1    |
| GF0048032 | 0                            | 0                         | 1                            | Hypothetical protein (1)                                             | ADP binding [GO:0043531 molecular_function] (1)                                                                                                                                                                                                                                                                                                                                                                                  | P-loop containing nucleoside triphosphate hydrolase [IPR027417] (1); NB-ARC [IPR002182] (1)                                                                                                                                                                                                                                            | -                               | -                            | P_trifoliata_00341_mRNA_21.1    |
| GF0048031 | 0                            | 0                         | 1                            | Putative disease resistance RGA1 (1)                                 | ADP binding [GO:0043531 molecular_function] (1)                                                                                                                                                                                                                                                                                                                                                                                  | Leucine-rich repeat domain, L domain-like [IPR032675] (1); NB-ARC [IPR002182] (1); P-loop containing nucleoside triphosphate hydrolase [IPR027417] (1)                                                                                                                                                                                 | -                               | -                            | P_trifoliata_00341_mRNA_20.1    |
| GF0048030 | 0                            | 0                         | 1                            | Hypothetical protein (1)                                             |                                                                                                                                                                                                                                                                                                                                                                                                                                  |                                                                                                                                                                                                                                                                                                                                        | -                               | -                            | P_trifoliata_00341_mRNA_19.1    |
| GF0048029 | 0                            | 0                         | 1                            | Hypothetical protein (1)                                             |                                                                                                                                                                                                                                                                                                                                                                                                                                  |                                                                                                                                                                                                                                                                                                                                        | -                               | -                            | P_trifoliata_00341_mRNA_18.1    |
| GF0048028 | 0                            | 0                         | 1                            | Hypothetical protein (1)                                             |                                                                                                                                                                                                                                                                                                                                                                                                                                  | Leucine-rich repeat domain, L domain-like [IPR032675] (1)                                                                                                                                                                                                                                                                              | -                               | -                            | P_trifoliata_00341_mRNA_15.1    |
| GF0048027 | 0                            | 0                         | 1                            | Hypothetical protein (1)                                             |                                                                                                                                                                                                                                                                                                                                                                                                                                  |                                                                                                                                                                                                                                                                                                                                        | -                               | -                            | P_trifoliata_00341_mRNA_14.1    |
| GF0048026 | 0                            | 0                         | 1                            | Hypothetical protein (1)                                             | zinc ion binding [GO:0008270 molecular_function] (1)                                                                                                                                                                                                                                                                                                                                                                             | Zinc finger, GRF-type [IPR010666] (1)                                                                                                                                                                                                                                                                                                  | -                               | -                            | P_trifoliata_00340_mRNA_4.1     |
| GF0048025 | 0                            | 0                         | 1                            | Hypothetical protein (1)                                             |                                                                                                                                                                                                                                                                                                                                                                                                                                  |                                                                                                                                                                                                                                                                                                                                        | -                               | -                            | P_trifoliata_00340_mRNA_12.1    |
| GF0048024 | 0                            | 0                         | 1                            | Hypothetical protein (1)                                             |                                                                                                                                                                                                                                                                                                                                                                                                                                  |                                                                                                                                                                                                                                                                                                                                        | -                               | -                            | P_trifoliata_00340_mRNA_1.1     |
| GF0048023 | 0                            | 0                         | 1                            | Hypothetical protein (1)                                             |                                                                                                                                                                                                                                                                                                                                                                                                                                  |                                                                                                                                                                                                                                                                                                                                        | -                               | -                            | P_trifoliata_00339_mRNA_4.1     |
| GF0048022 | 0                            | 0                         | 1                            | Hypothetical protein (1)                                             |                                                                                                                                                                                                                                                                                                                                                                                                                                  | Pyridoxal phosphate-dependent transferase [IPR015424] (1)                                                                                                                                                                                                                                                                              | -                               | -                            | P_trifoliata_00339_mRNA_36.1    |
| GF0048021 | 0                            | 0                         | 1                            | Hypothetical protein (1)                                             |                                                                                                                                                                                                                                                                                                                                                                                                                                  |                                                                                                                                                                                                                                                                                                                                        | -                               | -                            | P_trifoliata_00339_mRNA_35.1    |
| GF0048020 | 0                            | 0                         | 1                            | Hypothetical protein (1)                                             |                                                                                                                                                                                                                                                                                                                                                                                                                                  |                                                                                                                                                                                                                                                                                                                                        | -                               | -                            | P_trifoliata_00339_mRNA_33.1    |
| GF0048019 | 0                            | 0                         | 1                            | Hypothetical protein (1)                                             |                                                                                                                                                                                                                                                                                                                                                                                                                                  |                                                                                                                                                                                                                                                                                                                                        | -                               | -                            | P_trifoliata_00339_mRNA_32.1    |
| GF0048018 | 0                            | 0                         | 1                            | Hypothetical protein (1)                                             |                                                                                                                                                                                                                                                                                                                                                                                                                                  |                                                                                                                                                                                                                                                                                                                                        | -                               | -                            | P_trifoliata_00339_mRNA_30.1    |
| GF0048017 | 0                            | 0                         | 1                            | Hypothetical protein (1)                                             |                                                                                                                                                                                                                                                                                                                                                                                                                                  |                                                                                                                                                                                                                                                                                                                                        | -                               | -                            | P_trifoliata_00339_mRNA_23.1    |
| GF0048016 | 0                            | 0                         | 1                            | Hypothetical protein (1)                                             |                                                                                                                                                                                                                                                                                                                                                                                                                                  |                                                                                                                                                                                                                                                                                                                                        | -                               | -                            | P_trifoliata_00339_mRNA_22.1    |
| GF0048015 | 0                            | 0                         | 1                            | Hypothetical protein (1)                                             |                                                                                                                                                                                                                                                                                                                                                                                                                                  | Iso1-like splicing [IPR009360] (1)                                                                                                                                                                                                                                                                                                     | -                               | -                            | P_trifoliata_00339_mRNA_20.1    |
| GF0048014 | 0                            | 0                         | 1                            | Hypothetical protein (1)                                             |                                                                                                                                                                                                                                                                                                                                                                                                                                  |                                                                                                                                                                                                                                                                                                                                        | -                               | -                            | P_trifoliata_00339_mRNA_18.1    |
| GF0048013 | 0                            | 0                         | 1                            | Disease resistance family protein / LRR family protein, putative (1) | protein binding [GO:0005515 molecular_function] (1)                                                                                                                                                                                                                                                                                                                                                                              | Leucine-rich repeat domain, L domain-like [IPR032675] (1); Leucine-rich repeat, typical subtype [IPR035911] (1); Leucine-rich repeat-containing N-terminal, plant-type [IPR013210] (1); Leucine-rich repeat [IPR001611] (1)                                                                                                            | -                               | -                            | P_trifoliata_00339_mRNA_17.1    |
| GF0048012 | 0                            | 0                         | 1                            | Hypothetical protein (1)                                             |                                                                                                                                                                                                                                                                                                                                                                                                                                  |                                                                                                                                                                                                                                                                                                                                        | -                               | -                            | P_trifoliata_00339_mRNA_15.1    |
| GF0048011 | 0                            | 0                         | 1                            | Hypothetical protein (1)                                             |                                                                                                                                                                                                                                                                                                                                                                                                                                  |                                                                                                                                                                                                                                                                                                                                        | -                               | -                            | P_trifoliata_00339_mRNA_1.1     |

| ID        | Num. in <i>C. clementiae</i> | Num. in <i>C. canthii</i> | Num. in <i>F. rufifolius</i> | Note                                                        | GO                                                                                                                                                                                                                                                                                                                                                                                                          | InterPro                                                                                                                                                                                                                                                    | Members in <i>C. clementiae</i> | Members in <i>C. canthii</i> | Members in <i>F. rufifolius</i> |                              |
|-----------|------------------------------|---------------------------|------------------------------|-------------------------------------------------------------|-------------------------------------------------------------------------------------------------------------------------------------------------------------------------------------------------------------------------------------------------------------------------------------------------------------------------------------------------------------------------------------------------------------|-------------------------------------------------------------------------------------------------------------------------------------------------------------------------------------------------------------------------------------------------------------|---------------------------------|------------------------------|---------------------------------|------------------------------|
| GF0048010 | 0                            | 0                         | 0                            | 1 Hypothetical protein (1)                                  |                                                                                                                                                                                                                                                                                                                                                                                                             |                                                                                                                                                                                                                                                             |                                 |                              | P_trifoliata_00338_mRNA_6,1     |                              |
| GF0048009 | 0                            | 0                         | 0                            | 1 Hypothetical protein (1)                                  |                                                                                                                                                                                                                                                                                                                                                                                                             | Timeless protein [IPRO06906] (1)                                                                                                                                                                                                                            |                                 |                              | P_trifoliata_00338_mRNA_39,1    |                              |
| GF0048008 | 0                            | 0                         | 0                            | 1 Pyruvate kinase (1)                                       | magnesium ion binding [GO:0000287 molecular_function] (1); catalytic activity [GO:0003824 molecular_function] (1); potassium ion binding [GO:0030955 molecular_function] (1); pyruvate kinase activity [GO:0004743 molecular_function] (1); glycolytic process [GO:0006096 biological_process] (1); zinc ion binding [GO:0008270 molecular_function] (1); intracellular [GO:0005622 cellular_component] (1) | Pyruvate kinase, barrel [IPRO15793] (1); Pyruvate kinase, beta-barrel insert domain [IPRO15806] (1); Pyruvate kinase [IPRO101997] (1); Pyruvate kinase-like insert domain [IPRO110371] (1); Pyruvate/Phosphoenolpyruvate kinase-like domain [IPRO15813] (1) |                                 |                              | P_trifoliata_00338_mRNA_38,1    |                              |
| GF0048007 | 0                            | 0                         | 0                            | 1 Salt tolerance protein (1)                                |                                                                                                                                                                                                                                                                                                                                                                                                             | B-box-type zinc finger [IPRO00315] (1)                                                                                                                                                                                                                      |                                 |                              |                                 | P_trifoliata_00338_mRNA_35,1 |
| GF0048006 | 0                            | 0                         | 0                            | 1 Hypothetical protein (1)                                  |                                                                                                                                                                                                                                                                                                                                                                                                             |                                                                                                                                                                                                                                                             |                                 |                              |                                 | P_trifoliata_00338_mRNA_23,1 |
| GF0048005 | 0                            | 0                         | 0                            | 1 Hypothetical protein (1)                                  |                                                                                                                                                                                                                                                                                                                                                                                                             |                                                                                                                                                                                                                                                             |                                 |                              |                                 | P_trifoliata_00338_mRNA_19,1 |
| GF0048004 | 0                            | 0                         | 0                            | 1 Amino acid carrier 2 (1)                                  | amino acid transmembrane transport [GO:0003333 biological_process] (1); membrane [GO:0016020 cellular_component] (1); amino acid transmembrane transporter activity [GO:0015171 molecular_function] (1)                                                                                                                                                                                                     | Amino acid/polyamine transporter 1 [IPRO02293] (1)                                                                                                                                                                                                          |                                 |                              |                                 | P_trifoliata_00338_mRNA_12,1 |
| GF0048003 | 0                            | 0                         | 0                            | 1 Hypothetical protein (1)                                  |                                                                                                                                                                                                                                                                                                                                                                                                             | Isopenicillin N synthase-like [IPRO027443] (1)                                                                                                                                                                                                              |                                 |                              |                                 | P_trifoliata_00338_mRNA_1,1  |
| GF0048002 | 0                            | 0                         | 0                            | 1 Hypothetical protein (1)                                  | iron ion binding [GO:0005506 molecular_function] (1); heme binding [GO:0020037 molecular_function] (1); oxidation-reduction process [GO:005114 biological_process] (1); oxidoreductase activity, acting on paired donors, with incorporation or reduction of molecular oxygen [GO:0016705 molecular_function] (1)                                                                                           | Cytochrome P450 [IPRO01128] (1)                                                                                                                                                                                                                             |                                 |                              |                                 | P_trifoliata_00337_mRNA_23,1 |
| GF0048000 | 0                            | 0                         | 0                            | 1 Hypothetical protein (1)                                  | iron ion binding [GO:0005506 molecular_function] (1); heme binding [GO:0020037 molecular_function] (1); oxidation-reduction process [GO:005114 biological_process] (1); oxidoreductase activity, acting on paired donors, with incorporation or reduction of molecular oxygen [GO:0016705 molecular_function] (1)                                                                                           | Cytochrome P450 [IPRO01128] (1); Cytochrome P450, conserved site [IPRO17972] (1)                                                                                                                                                                            |                                 |                              |                                 | P_trifoliata_00337_mRNA_22,1 |
| GF0047999 | 0                            | 0                         | 0                            | 1 Hypothetical protein (1)                                  | ammonium transport [GO:0015696 biological_process] (1); membrane [GO:0016020 cellular_component] (1); ammonium transmembrane transport [GO:0072488 biological_process] (1); ammonium transmembrane transporter activity [GO:0008519 molecular_function] (1)                                                                                                                                                 | ClpP/crotonase-like domain [IPRO29045] (1)                                                                                                                                                                                                                  |                                 |                              |                                 | P_trifoliata_00336_mRNA_8,1  |
| GF0047998 | 0                            | 0                         | 0                            | 1 Ammonium transporter (1)                                  | ammonium transport [GO:0015696 biological_process] (1); membrane [GO:0016020 cellular_component] (1); ammonium transmembrane transport [GO:0072488 biological_process] (1); ammonium transmembrane transporter activity [GO:0008519 molecular_function] (1)                                                                                                                                                 | Ammonium/urea transporter [IPRO29020] (1); Ammonium transporter [IPRO29041] (1); Ammonium transporter [IPRO01905] (1)                                                                                                                                       |                                 |                              |                                 | P_trifoliata_00336_mRNA_7,1  |
| GF0047997 | 0                            | 0                         | 0                            | 1 Hypothetical protein (1)                                  |                                                                                                                                                                                                                                                                                                                                                                                                             |                                                                                                                                                                                                                                                             |                                 |                              |                                 | P_trifoliata_00336_mRNA_31,1 |
| GF0047996 | 0                            | 0                         | 0                            | 1 Hypothetical protein (1)                                  |                                                                                                                                                                                                                                                                                                                                                                                                             |                                                                                                                                                                                                                                                             |                                 |                              |                                 | P_trifoliata_00336_mRNA_3,1  |
| GF0047995 | 0                            | 0                         | 0                            | 1 Hypothetical protein (1)                                  |                                                                                                                                                                                                                                                                                                                                                                                                             |                                                                                                                                                                                                                                                             |                                 |                              |                                 | P_trifoliata_00336_mRNA_29,1 |
| GF0047994 | 0                            | 0                         | 0                            | 1 Hypothetical protein (1)                                  |                                                                                                                                                                                                                                                                                                                                                                                                             |                                                                                                                                                                                                                                                             |                                 |                              |                                 | P_trifoliata_00336_mRNA_27,1 |
| GF0047993 | 0                            | 0                         | 0                            | 1 Tau class glutathione S-transferase (1)                   | protein binding [GO:0005515 molecular_function] (1)                                                                                                                                                                                                                                                                                                                                                         | Glutathione S-transferase, C-terminal-like [IPRO10987] (1); Glutathione S-transferase, N-terminal [IPRO04045] (1); Thioredoxin-like fold [IPRO12336] (1)                                                                                                    |                                 |                              |                                 | P_trifoliata_00336_mRNA_26,1 |
| GF0047992 | 0                            | 0                         | 0                            | 1 LDLR chaperone MESD (1)                                   |                                                                                                                                                                                                                                                                                                                                                                                                             |                                                                                                                                                                                                                                                             |                                 |                              |                                 | P_trifoliata_00336_mRNA_20,1 |
| GF0047991 | 0                            | 0                         | 0                            | 1 Hypothetical protein (1)                                  |                                                                                                                                                                                                                                                                                                                                                                                                             |                                                                                                                                                                                                                                                             |                                 |                              |                                 | P_trifoliata_00336_mRNA_2,1  |
| GF0047990 | 0                            | 0                         | 0                            | 1 Hypothetical protein (1)                                  |                                                                                                                                                                                                                                                                                                                                                                                                             |                                                                                                                                                                                                                                                             |                                 |                              |                                 | P_trifoliata_00336_mRNA_19,1 |
| GF0047989 | 0                            | 0                         | 0                            | 1 Hypothetical protein (1)                                  | carbohydrate metabolic process [GO:0005975 biological_process] (1)                                                                                                                                                                                                                                                                                                                                          | Glycoside hydrolase, catalytic domain [IPRO13781] (1); Glycoside hydrolase superfamily [IPRO17853] (1)                                                                                                                                                      |                                 |                              |                                 | P_trifoliata_00336_mRNA_16,1 |
| GF0047988 | 0                            | 0                         | 0                            | 1 Hypothetical protein (1)                                  |                                                                                                                                                                                                                                                                                                                                                                                                             |                                                                                                                                                                                                                                                             |                                 |                              |                                 | P_trifoliata_00336_mRNA_15,1 |
| GF0047987 | 0                            | 0                         | 0                            | 1 Hypothetical protein (1)                                  |                                                                                                                                                                                                                                                                                                                                                                                                             |                                                                                                                                                                                                                                                             |                                 |                              |                                 | P_trifoliata_00336_mRNA_13,1 |
| GF0047986 | 0                            | 0                         | 0                            | 1 Hypothetical protein (1)                                  |                                                                                                                                                                                                                                                                                                                                                                                                             |                                                                                                                                                                                                                                                             |                                 |                              |                                 | P_trifoliata_00336_mRNA_12,1 |
| GF0047985 | 0                            | 0                         | 0                            | 1 Hypothetical protein (1)                                  |                                                                                                                                                                                                                                                                                                                                                                                                             |                                                                                                                                                                                                                                                             |                                 |                              |                                 | P_trifoliata_00336_mRNA_10,1 |
| GF0047984 | 0                            | 0                         | 0                            | 1 Hypothetical protein (1)                                  |                                                                                                                                                                                                                                                                                                                                                                                                             |                                                                                                                                                                                                                                                             |                                 |                              |                                 | P_trifoliata_00335_mRNA_9,1  |
| GF0047983 | 0                            | 0                         | 0                            | 1 Hypothetical protein (1)                                  |                                                                                                                                                                                                                                                                                                                                                                                                             |                                                                                                                                                                                                                                                             |                                 |                              |                                 | P_trifoliata_00335_mRNA_22,1 |
| GF0047982 | 0                            | 0                         | 0                            | 1 Hypothetical protein (1)                                  |                                                                                                                                                                                                                                                                                                                                                                                                             |                                                                                                                                                                                                                                                             |                                 |                              |                                 | P_trifoliata_00335_mRNA_2,1  |
| GF0047981 | 0                            | 0                         | 0                            | 1 Hypothetical protein (1)                                  |                                                                                                                                                                                                                                                                                                                                                                                                             |                                                                                                                                                                                                                                                             |                                 |                              |                                 | P_trifoliata_00335_mRNA_15,1 |
| GF0047980 | 0                            | 0                         | 0                            | 1 Hypothetical protein (1)                                  |                                                                                                                                                                                                                                                                                                                                                                                                             |                                                                                                                                                                                                                                                             |                                 |                              |                                 | P_trifoliata_00334_mRNA_9,1  |
| GF0047979 | 0                            | 0                         | 0                            | 1 Hypothetical protein (1)                                  |                                                                                                                                                                                                                                                                                                                                                                                                             |                                                                                                                                                                                                                                                             |                                 |                              |                                 | P_trifoliata_00334_mRNA_28,1 |
| GF0047978 | 0                            | 0                         | 0                            | 1 Hypothetical protein (1)                                  |                                                                                                                                                                                                                                                                                                                                                                                                             |                                                                                                                                                                                                                                                             |                                 |                              |                                 | P_trifoliata_00334_mRNA_20,1 |
| GF0047977 | 0                            | 0                         | 0                            | 1 Elongator complex protein 4 isoform 2 (1)                 | Elongator holoenzyme complex [GO:003588 cellular_component] (1)                                                                                                                                                                                                                                                                                                                                             | Elongator complex protein 4 [IPRO08728] (1); P-loop containing nucleoside triphosphate hydrolase [IPRO27417] (1)                                                                                                                                            |                                 |                              |                                 | P_trifoliata_00334_mRNA_2,1  |
| GF0047976 | 0                            | 0                         | 0                            | 1 Hypothetical protein (1)                                  |                                                                                                                                                                                                                                                                                                                                                                                                             |                                                                                                                                                                                                                                                             |                                 |                              |                                 | P_trifoliata_00334_mRNA_17,1 |
| GF0047975 | 0                            | 0                         | 0                            | 1 Hypothetical protein (1)                                  |                                                                                                                                                                                                                                                                                                                                                                                                             |                                                                                                                                                                                                                                                             |                                 |                              |                                 | P_trifoliata_00334_mRNA_16,1 |
| GF0047974 | 0                            | 0                         | 0                            | 1 Hypothetical protein (1)                                  |                                                                                                                                                                                                                                                                                                                                                                                                             |                                                                                                                                                                                                                                                             |                                 |                              |                                 | P_trifoliata_00334_mRNA_10,1 |
| GF0047973 | 0                            | 0                         | 0                            | 1 Hypothetical protein (1)                                  |                                                                                                                                                                                                                                                                                                                                                                                                             |                                                                                                                                                                                                                                                             |                                 |                              |                                 | P_trifoliata_00334_mRNA_1,1  |
| GF0047972 | 0                            | 0                         | 0                            | 1 Hypothetical protein (1)                                  | carbohydrate metabolic process [GO:0005975 biological_process] (1); polygalacturonase activity [GO:0004650 molecular_function] (1)                                                                                                                                                                                                                                                                          | Glycoside hydrolase, family 28 [IPRO08743] (1); Pectin lyase fold [IPRO12334] (1); Pectin lyase fold/violence factor [IPRO11050] (1)                                                                                                                        |                                 |                              |                                 | P_trifoliata_00333_mRNA_8,1  |
| GF0047971 | 0                            | 0                         | 0                            | 1 Hypothetical protein (1)                                  |                                                                                                                                                                                                                                                                                                                                                                                                             |                                                                                                                                                                                                                                                             |                                 |                              |                                 | P_trifoliata_00333_mRNA_5,1  |
| GF0047970 | 0                            | 0                         | 0                            | 1 Hypothetical protein (1)                                  |                                                                                                                                                                                                                                                                                                                                                                                                             |                                                                                                                                                                                                                                                             |                                 |                              |                                 | P_trifoliata_00333_mRNA_32,1 |
| GF0047969 | 0                            | 0                         | 0                            | 1 Hypothetical protein (1)                                  |                                                                                                                                                                                                                                                                                                                                                                                                             |                                                                                                                                                                                                                                                             |                                 |                              |                                 | P_trifoliata_00333_mRNA_30,1 |
| GF0047968 | 0                            | 0                         | 0                            | 1 Hypothetical protein (1)                                  |                                                                                                                                                                                                                                                                                                                                                                                                             |                                                                                                                                                                                                                                                             |                                 |                              |                                 | P_trifoliata_00333_mRNA_1,1  |
| GF0047967 | 0                            | 0                         | 0                            | 1 Hypothetical protein (1)                                  |                                                                                                                                                                                                                                                                                                                                                                                                             |                                                                                                                                                                                                                                                             |                                 |                              |                                 | P_trifoliata_00332_mRNA_9,1  |
| GF0047966 | 0                            | 0                         | 0                            | 1 Hypothetical protein (1)                                  |                                                                                                                                                                                                                                                                                                                                                                                                             |                                                                                                                                                                                                                                                             |                                 |                              |                                 | P_trifoliata_00332_mRNA_7,1  |
| GF0047965 | 0                            | 0                         | 0                            | 1 Hypothetical protein (1)                                  |                                                                                                                                                                                                                                                                                                                                                                                                             | Viral movement protein [IPRO28919] (1)                                                                                                                                                                                                                      |                                 |                              |                                 | P_trifoliata_00332_mRNA_5,1  |
| GF0047964 | 0                            | 0                         | 0                            | 1 Cytokinin riboside 5'-monophosphate phosphorhydrolase (1) |                                                                                                                                                                                                                                                                                                                                                                                                             | LOG family [IPRO31100] (1)                                                                                                                                                                                                                                  |                                 |                              |                                 | P_trifoliata_00332_mRNA_4,1  |
| GF0047963 | 0                            | 0                         | 0                            | 1 Hypothetical protein (1)                                  |                                                                                                                                                                                                                                                                                                                                                                                                             |                                                                                                                                                                                                                                                             |                                 |                              |                                 | P_trifoliata_00332_mRNA_2,1  |
| GF0047962 | 0                            | 0                         | 0                            | 1 Hypothetical protein (1)                                  |                                                                                                                                                                                                                                                                                                                                                                                                             |                                                                                                                                                                                                                                                             |                                 |                              |                                 | P_trifoliata_00332_mRNA_17,1 |
| GF0047961 | 0                            | 0                         | 0                            | 1 Hypothetical protein (1)                                  |                                                                                                                                                                                                                                                                                                                                                                                                             |                                                                                                                                                                                                                                                             |                                 |                              |                                 | P_trifoliata_00332_mRNA_15,1 |
| GF0047960 | 0                            | 0                         | 0                            | 1 Hypothetical protein (1)                                  |                                                                                                                                                                                                                                                                                                                                                                                                             | Cytokinin riboside 5'-monophosphate phosphorhydrolase LOG [IPRO05269] (1); LOG family [IPRO31100] (1)                                                                                                                                                       |                                 |                              |                                 | P_trifoliata_00332_mRNA_14,1 |
| GF0047959 | 0                            | 0                         | 0                            | 1 Hypothetical protein (1)                                  |                                                                                                                                                                                                                                                                                                                                                                                                             |                                                                                                                                                                                                                                                             |                                 |                              |                                 | P_trifoliata_00332_mRNA_13,1 |
| GF0047958 | 0                            | 0                         | 0                            | 1 Hypothetical protein (1)                                  |                                                                                                                                                                                                                                                                                                                                                                                                             |                                                                                                                                                                                                                                                             |                                 |                              |                                 | P_trifoliata_00332_mRNA_11,1 |
| GF0047957 | 0                            | 0                         | 0                            | 1 Hypothetical protein (1)                                  |                                                                                                                                                                                                                                                                                                                                                                                                             |                                                                                                                                                                                                                                                             |                                 |                              |                                 | P_trifoliata_00331_mRNA_9,1  |
| GF0047956 | 0                            | 0                         | 0                            | 1 Hypothetical protein (1)                                  |                                                                                                                                                                                                                                                                                                                                                                                                             |                                                                                                                                                                                                                                                             |                                 |                              |                                 | P_trifoliata_00331_mRNA_8,1  |
| GF0047955 | 0                            | 0                         | 0                            | 1 Hypothetical protein (1)                                  |                                                                                                                                                                                                                                                                                                                                                                                                             |                                                                                                                                                                                                                                                             |                                 |                              |                                 | P_trifoliata_00331_mRNA_34,1 |
| GF0047954 | 0                            | 0                         | 0                            | 1 Hypothetical protein (1)                                  | cysteine-type peptidase activity [GO:0008234 molecular_function] (1); proteolysis [GO:0006508 biological_process] (1)                                                                                                                                                                                                                                                                                       | Ulp1 protease family, C-terminal catalytic domain [IPRO03653] (1)                                                                                                                                                                                           |                                 |                              |                                 | P_trifoliata_00331_mRNA_31,1 |
| GF0047953 | 0                            | 0                         | 0                            | 1 Acylsugar acyltransferase 2 (1)                           | transferase activity, transferring acyl groups other than amino-acyl groups [GO:0016747 molecular_function] (1)                                                                                                                                                                                                                                                                                             | Transferase [IPRO03480] (1); Chloramphenicol acetyltransferase-like domain [IPRO23213] (1)                                                                                                                                                                  |                                 |                              |                                 | P_trifoliata_00331_mRNA_30,1 |
| GF0047952 | 0                            | 0                         | 0                            | 1 Hypothetical protein (1)                                  | protein binding [GO:0005515 molecular_function] (1)                                                                                                                                                                                                                                                                                                                                                         | Askyrin repeat-containing domain [IPRO20683] (1); Askyrin repeat [IPRO02110] (1)                                                                                                                                                                            |                                 |                              |                                 | P_trifoliata_00331_mRNA_23,1 |
| GF0047951 | 0                            | 0                         | 0                            | 1 Hypothetical protein (1)                                  |                                                                                                                                                                                                                                                                                                                                                                                                             | Reverse transcriptase domain [IPRO04077] (1)                                                                                                                                                                                                                |                                 |                              |                                 | P_trifoliata_00331_mRNA_13,1 |
| GF0047950 | 0                            | 0                         | 0                            | 1 Hypothetical protein (1)                                  |                                                                                                                                                                                                                                                                                                                                                                                                             |                                                                                                                                                                                                                                                             |                                 |                              |                                 | P_trifoliata_00331_mRNA_12,1 |
| GF0047949 | 0                            | 0                         | 0                            | 1 Hypothetical protein (1)                                  |                                                                                                                                                                                                                                                                                                                                                                                                             |                                                                                                                                                                                                                                                             |                                 |                              |                                 | P_trifoliata_00330_mRNA_4,1  |
| GF0047948 | 0                            | 0                         | 0                            | 1 Hypothetical protein (1)                                  |                                                                                                                                                                                                                                                                                                                                                                                                             |                                                                                                                                                                                                                                                             |                                 |                              |                                 | P_trifoliata_00330_mRNA_3,1  |
| GF0047947 | 0                            | 0                         | 0                            | 1 Protein AG1 (1)                                           | GTP binding [GO:0005525 molecular_function] (1)                                                                                                                                                                                                                                                                                                                                                             | AG1-type guanine nucleotide-binding (G) domain [IPRO06703] (1); P-loop containing nucleoside triphosphate hydrolase [IPRO27417] (1)                                                                                                                         |                                 |                              |                                 | P_trifoliata_00330_mRNA_23,1 |
| GF0047946 | 0                            | 0                         | 0                            | 1 Hypothetical protein (1)                                  |                                                                                                                                                                                                                                                                                                                                                                                                             |                                                                                                                                                                                                                                                             |                                 |                              |                                 | P_trifoliata_00330_mRNA_2,1  |
| GF0047945 | 0                            | 0                         | 0                            | 1 Hypothetical protein (1)                                  |                                                                                                                                                                                                                                                                                                                                                                                                             |                                                                                                                                                                                                                                                             |                                 |                              |                                 | P_trifoliata_00330_mRNA_14,1 |
| GF0047944 | 0                            | 0                         | 0                            | 1 Hypothetical protein (1)                                  |                                                                                                                                                                                                                                                                                                                                                                                                             |                                                                                                                                                                                                                                                             |                                 |                              |                                 | P_trifoliata_00330_mRNA_13,1 |
| GF0047943 | 0                            | 0                         | 0                            | 1 Pla (1)                                                   |                                                                                                                                                                                                                                                                                                                                                                                                             | Phloem protein 2-like [IPRO25886] (1)                                                                                                                                                                                                                       |                                 |                              |                                 | P_trifoliata_00330_mRNA_12,1 |
| GF0047942 | 0                            | 0                         | 0                            | 1 Protein Y1P (1)                                           | membrane [GO:0016020 cellular_component] (1)                                                                                                                                                                                                                                                                                                                                                                | Yip1 domain [IPRO06977] (1)                                                                                                                                                                                                                                 |                                 |                              |                                 | P_trifoliata_00330_mRNA_10,1 |
| GF0047941 | 0                            | 0                         | 0                            | 1 Hypothetical protein (1)                                  |                                                                                                                                                                                                                                                                                                                                                                                                             | Iron hydrogenase, large subunit, C-terminal [IPRO04108] (1); Iron hydrogenase [IPRO09016] (1); Iron hydrogenase, small subunit [IPRO03149] (1)                                                                                                              |                                 |                              |                                 | P_trifoliata_00329_mRNA_24,1 |
| GF0047940 | 0                            | 0                         | 0                            | 1 Hypothetical protein (1)                                  |                                                                                                                                                                                                                                                                                                                                                                                                             |                                                                                                                                                                                                                                                             |                                 |                              |                                 | P_trifoliata_00329_mRNA_22,1 |
| GF0047939 | 0                            | 0                         | 0                            | 1 Hypothetical protein (1)                                  |                                                                                                                                                                                                                                                                                                                                                                                                             |                                                                                                                                                                                                                                                             |                                 |                              |                                 | P_trifoliata_00329_mRNA_21,1 |
| GF0047938 | 0                            | 0                         | 0                            | 1 Hypothetical protein (1)                                  |                                                                                                                                                                                                                                                                                                                                                                                                             |                                                                                                                                                                                                                                                             |                                 |                              |                                 | P_trifoliata_00329_mRNA_2,1  |



| ID        | Num. in <i>C. caryocarpae</i> | Num. in <i>C. umbilo</i> | Num. in <i>P. trifoliata</i> | Note                                                                  | GO                                                                                                                                                                                                                                                                                                                                                                                                                                                                                                                                         | InterPro                                                                                                                                                                                                                                                                                                                                                     | Members in <i>C. caryocarpae</i> | Members in <i>C. umbilo</i> | Members in <i>P. trifoliata</i> |
|-----------|-------------------------------|--------------------------|------------------------------|-----------------------------------------------------------------------|--------------------------------------------------------------------------------------------------------------------------------------------------------------------------------------------------------------------------------------------------------------------------------------------------------------------------------------------------------------------------------------------------------------------------------------------------------------------------------------------------------------------------------------------|--------------------------------------------------------------------------------------------------------------------------------------------------------------------------------------------------------------------------------------------------------------------------------------------------------------------------------------------------------------|----------------------------------|-----------------------------|---------------------------------|
| GF0047885 | 0                             | 0                        | 1                            | Mavicyanin (1)                                                        | electron carrier activity [GO:0009055 molecular_function] (1)                                                                                                                                                                                                                                                                                                                                                                                                                                                                              | Cupredoxin [IPRO08972] (1); Blue (type 1) copper protein, binding site [IPRO28871] (1); Phytoeyanin domain [IPRO03245] (1)                                                                                                                                                                                                                                   | -                                | -                           | P_trifoliata_00324_miRNA_4,1    |
| GF0047884 | 0                             | 0                        | 1                            | Hypothetical protein (1)                                              |                                                                                                                                                                                                                                                                                                                                                                                                                                                                                                                                            |                                                                                                                                                                                                                                                                                                                                                              |                                  |                             | P_trifoliata_00324_miRNA_37,1   |
| GF0047883 | 0                             | 0                        | 1                            | 28 kDa heat-stable acid-stable phosphoprotein (1)                     |                                                                                                                                                                                                                                                                                                                                                                                                                                                                                                                                            | Casoin kinase substrate, phosphoprotein PF28 [IPRO19380] (1)                                                                                                                                                                                                                                                                                                 |                                  |                             | P_trifoliata_00324_miRNA_29,2   |
| GF0047882 | 0                             | 0                        | 1                            | Ras-related protein RABAI1 (1)                                        | signal transduction [GO:0007165 biological_process] (1); intracellular protein transport [GO:0006886 biological_process] (1); GTP binding [GO:0005525 molecular_function] (1); intracellular [GO:0005622 cellular_component] (1); nucleocytoplasmic transport [GO:0006913 biological_process] (1); small GTPase mediated signal transduction [GO:0007264 biological_process] (1); membrane [GO:0016020 cellular_component] (1); protein transport [GO:0015031 biological_process] (1); GTPase activity [GO:0005924 molecular_function] (1) | Small GTPase superfamily, Rho type [IPRO03578] (1); Small GTP-binding protein domain [IPRO05225] (1); P-loop containing nucleoside-triphosphate hydrolase [IPRO27417] (1); Small GTPase superfamily [IPRO1806] (1); Ran GTPase [IPRO02041] (1); Small GTPase superfamily, Rab type [IPRO03579] (1); Small GTPase superfamily, Ras type [IPRO02049] (1)       |                                  |                             | P_trifoliata_00324_miRNA_26,1   |
| GF0047881 | 0                             | 0                        | 1                            | Hypothetical protein (1)                                              | protein dimerization activity [GO:0040983 molecular_function] (1); nucleic acid binding [GO:0003676 molecular_function] (1)                                                                                                                                                                                                                                                                                                                                                                                                                | HAT, C-terminal dimerisation domain [IPRO08906] (1); Ribonuclease H-like domain [IPRO12337] (1)                                                                                                                                                                                                                                                              |                                  |                             | P_trifoliata_00324_miRNA_24,1   |
| GF0047880 | 0                             | 0                        | 1                            | Hypothetical protein (1)                                              |                                                                                                                                                                                                                                                                                                                                                                                                                                                                                                                                            | Retinotransposon gag domain [IPRO05162] (1)                                                                                                                                                                                                                                                                                                                  |                                  |                             | P_trifoliata_00324_miRNA_23,1   |
| GF0047879 | 0                             | 0                        | 1                            | Hypothetical protein (1)                                              |                                                                                                                                                                                                                                                                                                                                                                                                                                                                                                                                            |                                                                                                                                                                                                                                                                                                                                                              |                                  |                             | P_trifoliata_00324_miRNA_19,1   |
| GF0047878 | 0                             | 0                        | 1                            | Hypothetical protein (1)                                              |                                                                                                                                                                                                                                                                                                                                                                                                                                                                                                                                            |                                                                                                                                                                                                                                                                                                                                                              |                                  |                             | P_trifoliata_00324_miRNA_17,1   |
| GF0047877 | 0                             | 0                        | 1                            | Hypothetical protein (1)                                              |                                                                                                                                                                                                                                                                                                                                                                                                                                                                                                                                            |                                                                                                                                                                                                                                                                                                                                                              |                                  |                             | P_trifoliata_00324_miRNA_16,1   |
| GF0047876 | 0                             | 0                        | 1                            | Hypothetical protein (1)                                              | zinc ion binding [GO:0008270 molecular_function] (1)                                                                                                                                                                                                                                                                                                                                                                                                                                                                                       | Zinc finger, GRF-type [IPRO10666] (1)                                                                                                                                                                                                                                                                                                                        |                                  |                             | P_trifoliata_00324_miRNA_15,1   |
| GF0047875 | 0                             | 0                        | 1                            | Hypothetical protein (1)                                              |                                                                                                                                                                                                                                                                                                                                                                                                                                                                                                                                            |                                                                                                                                                                                                                                                                                                                                                              |                                  |                             | P_trifoliata_00324_miRNA_14,1   |
| GF0047874 | 0                             | 0                        | 1                            | Hypothetical protein (1)                                              |                                                                                                                                                                                                                                                                                                                                                                                                                                                                                                                                            |                                                                                                                                                                                                                                                                                                                                                              |                                  |                             | P_trifoliata_00324_miRNA_13,1   |
| GF0047873 | 0                             | 0                        | 1                            | Hypothetical protein (1)                                              |                                                                                                                                                                                                                                                                                                                                                                                                                                                                                                                                            |                                                                                                                                                                                                                                                                                                                                                              |                                  |                             | P_trifoliata_00324_miRNA_11,1   |
| GF0047872 | 0                             | 0                        | 1                            | Hypothetical protein (1)                                              |                                                                                                                                                                                                                                                                                                                                                                                                                                                                                                                                            |                                                                                                                                                                                                                                                                                                                                                              |                                  |                             | P_trifoliata_00323_miRNA_8,1    |
| GF0047871 | 0                             | 0                        | 1                            | Hypothetical protein (1)                                              |                                                                                                                                                                                                                                                                                                                                                                                                                                                                                                                                            | Gag-polypeptide of LTR copia-type [IPRO29472] (1)                                                                                                                                                                                                                                                                                                            |                                  |                             | P_trifoliata_00323_miRNA_6,1    |
| GF0047870 | 0                             | 0                        | 1                            | Hypothetical protein (1)                                              |                                                                                                                                                                                                                                                                                                                                                                                                                                                                                                                                            |                                                                                                                                                                                                                                                                                                                                                              |                                  |                             | P_trifoliata_00323_miRNA_5,1    |
| GF0047869 | 0                             | 0                        | 1                            | Hypothetical protein (1)                                              |                                                                                                                                                                                                                                                                                                                                                                                                                                                                                                                                            |                                                                                                                                                                                                                                                                                                                                                              |                                  |                             | P_trifoliata_00323_miRNA_4,1    |
| GF0047868 | 0                             | 0                        | 1                            | Hypothetical protein (1)                                              |                                                                                                                                                                                                                                                                                                                                                                                                                                                                                                                                            |                                                                                                                                                                                                                                                                                                                                                              |                                  |                             | P_trifoliata_00323_miRNA_3,1    |
| GF0047867 | 0                             | 0                        | 1                            | Hypothetical protein (1)                                              |                                                                                                                                                                                                                                                                                                                                                                                                                                                                                                                                            |                                                                                                                                                                                                                                                                                                                                                              |                                  |                             | P_trifoliata_00323_miRNA_29,1   |
| GF0047866 | 0                             | 0                        | 1                            | Hypothetical protein (1)                                              |                                                                                                                                                                                                                                                                                                                                                                                                                                                                                                                                            | SGNH hydrolase-type esterase domain [IPRO13830] (1)                                                                                                                                                                                                                                                                                                          |                                  |                             | P_trifoliata_00323_miRNA_28,1   |
| GF0047865 | 0                             | 0                        | 1                            | Hypothetical protein (1)                                              |                                                                                                                                                                                                                                                                                                                                                                                                                                                                                                                                            |                                                                                                                                                                                                                                                                                                                                                              |                                  |                             | P_trifoliata_00323_miRNA_22,1   |
| GF0047864 | 0                             | 0                        | 1                            | Hypothetical protein (1)                                              |                                                                                                                                                                                                                                                                                                                                                                                                                                                                                                                                            |                                                                                                                                                                                                                                                                                                                                                              |                                  |                             | P_trifoliata_00323_miRNA_20,1   |
| GF0047863 | 0                             | 0                        | 1                            | Hypothetical protein (1)                                              |                                                                                                                                                                                                                                                                                                                                                                                                                                                                                                                                            |                                                                                                                                                                                                                                                                                                                                                              |                                  |                             | P_trifoliata_00323_miRNA_15,1   |
| GF0047862 | 0                             | 0                        | 1                            | Hypothetical protein (1)                                              |                                                                                                                                                                                                                                                                                                                                                                                                                                                                                                                                            |                                                                                                                                                                                                                                                                                                                                                              |                                  |                             | P_trifoliata_00323_miRNA_14,1   |
| GF0047861 | 0                             | 0                        | 1                            | Hypothetical protein (1)                                              |                                                                                                                                                                                                                                                                                                                                                                                                                                                                                                                                            |                                                                                                                                                                                                                                                                                                                                                              |                                  |                             | P_trifoliata_00323_miRNA_10,1   |
| GF0047860 | 0                             | 0                        | 1                            | Caffeic acid O-methyltransferase (1)                                  | methyltransferase activity [GO:0008168 molecular_function] (1); O-methyltransferase activity [GO:0008171 molecular_function] (1); protein dimerization activity [GO:0040983 molecular_function] (1)                                                                                                                                                                                                                                                                                                                                        | S-adenosyl-L-methionine-dependent methyltransferase [IPRO29063] (1); O-methyltransferase, family 2 [IPRO1077] (1); Winged helix-trans helix DNA-binding domain [IPRO11991] (1); Plant methyltransferase dimerisation [IPRO12967] (1); O-methyltransferase COMT-type [IPRO16461] (1)                                                                          |                                  |                             | P_trifoliata_00323_miRNA_1,1    |
| GF0047859 | 0                             | 0                        | 1                            | Putative pre-mRNA-splicing factor ATP-dependent RNA helicase (1)      | ATP-dependent helicase activity [GO:0008026 molecular_function] (1); nucleic acid binding [GO:0003676 molecular_function] (1); ATP binding [GO:0005524 molecular_function] (1)                                                                                                                                                                                                                                                                                                                                                             | Helicase, C-terminal [IPRO01650] (1); Helicase superfamily 1/2, ATP-binding domain [IPRO14001] (1); DNA-RNA helicase, ATP-dependent, DEAD-box type, conserved site [IPRO2464] (1); P-loop containing nucleoside triphosphate hydrolase [IPRO127417] (1)                                                                                                      |                                  |                             | P_trifoliata_00322_miRNA_43,1   |
| GF0047858 | 0                             | 0                        | 1                            | Hypothetical protein (1)                                              |                                                                                                                                                                                                                                                                                                                                                                                                                                                                                                                                            | Receptor, ligand binding region [IPRO01828] (1); Periplasmic binding protein-like 1 [IPRO28082] (1)                                                                                                                                                                                                                                                          |                                  |                             | P_trifoliata_00322_miRNA_42,1   |
| GF0047857 | 0                             | 0                        | 1                            | Glutamate receptor (1)                                                | isotropic glutamate receptor activity [GO:0004970 molecular_function] (1); membrane [GO:0016020 cellular_component] (1)                                                                                                                                                                                                                                                                                                                                                                                                                    | Isotropic glutamate receptor [IPRO01320] (1); Solute-binding protein family 3 N-terminal domain of MiF [IPRO01638] (1)                                                                                                                                                                                                                                       |                                  |                             | P_trifoliata_00322_miRNA_41,1   |
| GF0047856 | 0                             | 0                        | 1                            | Hypothetical protein (1)                                              |                                                                                                                                                                                                                                                                                                                                                                                                                                                                                                                                            | Concanavalin A-like lectin/glucanase domain [IPRO13320] (1)                                                                                                                                                                                                                                                                                                  |                                  |                             | P_trifoliata_00322_miRNA_22,1   |
| GF0047855 | 0                             | 0                        | 1                            | Hypothetical protein (1)                                              |                                                                                                                                                                                                                                                                                                                                                                                                                                                                                                                                            | Pentatricopeptide repeat [IPRO02885] (1)                                                                                                                                                                                                                                                                                                                     |                                  |                             | P_trifoliata_00322_miRNA_12,1   |
| GF0047854 | 0                             | 0                        | 1                            | Hypothetical protein (1)                                              | transmembrane transport [GO:0055085 biological_process] (1); transporter activity [GO:0005315 molecular_function] (1); transmembrane transporter activity [GO:0022857 molecular_function] (1); membrane [GO:0016020 cellular_component] (1); integral component of membrane [GO:0016021 cellular_component] (1); substrate-specific transmembrane transporter activity [GO:0022891 molecular_function] (1)                                                                                                                                 | Major facilitator superfamily domain [IPRO20846] (1); Sugar transporter, conserved site [IPRO05829] (1); Sugar/inositol transporter [IPRO03463] (1); Major facilitator, sugar transporter-like [IPRO05828] (1)                                                                                                                                               |                                  |                             | P_trifoliata_00321_miRNA_5,1    |
| GF0047853 | 0                             | 0                        | 1                            | Hypothetical protein (1)                                              | transmembrane transport [GO:0055085 biological_process] (1); integral component of membrane [GO:0016021 cellular_component] (1); transmembrane transporter activity [GO:0022857 molecular_function] (1)                                                                                                                                                                                                                                                                                                                                    | Major facilitator, sugar transporter-like [IPRO05828] (1); Major facilitator superfamily domain [IPRO20846] (1); RNA-dependent RNA polymerase, mitoviral [IPRO08686] (1)                                                                                                                                                                                     |                                  |                             | P_trifoliata_00321_miRNA_4,1    |
| GF0047852 | 0                             | 0                        | 1                            | Hypothetical protein (1)                                              |                                                                                                                                                                                                                                                                                                                                                                                                                                                                                                                                            |                                                                                                                                                                                                                                                                                                                                                              |                                  |                             | P_trifoliata_00321_miRNA_33,1   |
| GF0047851 | 0                             | 0                        | 1                            | Hypothetical protein (1)                                              |                                                                                                                                                                                                                                                                                                                                                                                                                                                                                                                                            |                                                                                                                                                                                                                                                                                                                                                              |                                  |                             | P_trifoliata_00321_miRNA_31,1   |
| GF0047850 | 0                             | 0                        | 1                            | Hypothetical protein (1)                                              |                                                                                                                                                                                                                                                                                                                                                                                                                                                                                                                                            |                                                                                                                                                                                                                                                                                                                                                              |                                  |                             | P_trifoliata_00321_miRNA_26,1   |
| GF0047849 | 0                             | 0                        | 1                            | Hypothetical protein (1)                                              |                                                                                                                                                                                                                                                                                                                                                                                                                                                                                                                                            |                                                                                                                                                                                                                                                                                                                                                              |                                  |                             | P_trifoliata_00321_miRNA_22,1   |
| GF0047848 | 0                             | 0                        | 1                            | Hypothetical protein (1)                                              | extracellular region [GO:0005576 cellular_component] (1); sexual reproduction [GO:0019953 biological_process] (1)                                                                                                                                                                                                                                                                                                                                                                                                                          | Expansin, cellulose-binding-like domain [IPRO07117] (1); GroES-like [IPRO11032] (1); Major pollen allergen Lol p [IPRO05795] (1)                                                                                                                                                                                                                             |                                  |                             | P_trifoliata_00321_miRNA_17,1   |
| GF0047847 | 0                             | 0                        | 1                            | Hypothetical protein (1)                                              | extracellular region [GO:0005576 cellular_component] (1); sexual reproduction [GO:0019953 biological_process] (1)                                                                                                                                                                                                                                                                                                                                                                                                                          | Expansin-Lol p [IPRO07118] (1); Expansin, cellulose-binding-like domain [IPRO07117] (1); Isopenicillin N synthase-like [IPRO07443] (1); RfpA-like double-pipe beta-barrel domain [IPRO09009] (1); Expansin/pollen allergen, DP9B domain [IPRO07112] (1); Non-haem dioxygenase N-terminal domain [IPRO26992] (1); Major pollen allergen Lol p [IPRO05795] (1) |                                  |                             | P_trifoliata_00321_miRNA_16,1   |
| GF0047846 | 0                             | 0                        | 1                            | Hypothetical protein (1)                                              | transmembrane transport [GO:0055085 biological_process] (1); integral component of membrane [GO:0016021 cellular_component] (1); transmembrane transporter activity [GO:0022857 molecular_function] (1)                                                                                                                                                                                                                                                                                                                                    | Major facilitator, sugar transporter-like [IPRO05828] (1); Major facilitator superfamily domain [IPRO20846] (1)                                                                                                                                                                                                                                              |                                  |                             | P_trifoliata_00321_miRNA_12,1   |
| GF0047845 | 0                             | 0                        | 1                            | Hypothetical protein (1)                                              |                                                                                                                                                                                                                                                                                                                                                                                                                                                                                                                                            | RanC-like jelly roll fold [IPRO14710] (1); RanC-like cupin domain [IPRO11051] (1)                                                                                                                                                                                                                                                                            |                                  |                             | P_trifoliata_00320_miRNA_8,1    |
| GF0047844 | 0                             | 0                        | 1                            | Hypothetical protein (1)                                              |                                                                                                                                                                                                                                                                                                                                                                                                                                                                                                                                            |                                                                                                                                                                                                                                                                                                                                                              |                                  |                             | P_trifoliata_00320_miRNA_5,1    |
| GF0047843 | 0                             | 0                        | 1                            | Hypothetical protein (1)                                              |                                                                                                                                                                                                                                                                                                                                                                                                                                                                                                                                            |                                                                                                                                                                                                                                                                                                                                                              |                                  |                             | P_trifoliata_00320_miRNA_35,1   |
| GF0047842 | 0                             | 0                        | 1                            | Hypothetical protein (1)                                              |                                                                                                                                                                                                                                                                                                                                                                                                                                                                                                                                            |                                                                                                                                                                                                                                                                                                                                                              |                                  |                             | P_trifoliata_00320_miRNA_34,1   |
| GF0047841 | 0                             | 0                        | 1                            | LRR and NB-ARC domains-containing disease resistance-like protein (1) | ADP binding [GO:0043531 molecular_function] (1)                                                                                                                                                                                                                                                                                                                                                                                                                                                                                            | NB-ARC [IPRO2182] (1); AAA+ ATPase domain [IPRO03593] (1); P-loop containing nucleoside triphosphate hydrolase [IPRO27417] (1)                                                                                                                                                                                                                               |                                  |                             | P_trifoliata_00320_miRNA_20,1   |
| GF0047840 | 0                             | 0                        | 1                            | Hypothetical protein (1)                                              | DNA binding [GO:0003677 molecular_function] (1); regulation of transcription, DNA-templated [GO:0006355 biological_process] (1)                                                                                                                                                                                                                                                                                                                                                                                                            | NAC domain [IPRO03441] (1)                                                                                                                                                                                                                                                                                                                                   |                                  |                             | P_trifoliata_00320_miRNA_2,1    |
| GF0047839 | 0                             | 0                        | 1                            | Hypothetical protein (1)                                              |                                                                                                                                                                                                                                                                                                                                                                                                                                                                                                                                            |                                                                                                                                                                                                                                                                                                                                                              |                                  |                             | P_trifoliata_00320_miRNA_19,1   |
| GF0047838 | 0                             | 0                        | 1                            | Hypothetical protein (1)                                              |                                                                                                                                                                                                                                                                                                                                                                                                                                                                                                                                            |                                                                                                                                                                                                                                                                                                                                                              |                                  |                             | P_trifoliata_00320_miRNA_16,1   |
| GF0047837 | 0                             | 0                        | 1                            | Hypothetical protein (1)                                              |                                                                                                                                                                                                                                                                                                                                                                                                                                                                                                                                            | Domain of unknown function DUF4283 [IPRO25558] (1)                                                                                                                                                                                                                                                                                                           |                                  |                             | P_trifoliata_00320_miRNA_13,1   |
| GF0047836 | 0                             | 0                        | 1                            | Hypothetical protein (1)                                              |                                                                                                                                                                                                                                                                                                                                                                                                                                                                                                                                            |                                                                                                                                                                                                                                                                                                                                                              |                                  |                             | P_trifoliata_00320_miRNA_12,1   |
| GF0047835 | 0                             | 0                        | 1                            | Hypothetical protein (1)                                              |                                                                                                                                                                                                                                                                                                                                                                                                                                                                                                                                            |                                                                                                                                                                                                                                                                                                                                                              |                                  |                             | P_trifoliata_00320_miRNA_11,1   |
| GF0047834 | 0                             | 0                        | 1                            | Hypothetical protein (1)                                              |                                                                                                                                                                                                                                                                                                                                                                                                                                                                                                                                            |                                                                                                                                                                                                                                                                                                                                                              |                                  |                             | P_trifoliata_00319_miRNA_7,1    |
| GF0047833 | 0                             | 0                        | 1                            | Hypothetical protein (1)                                              | enzyme inhibitor activity [GO:0004857 molecular_function] (1)                                                                                                                                                                                                                                                                                                                                                                                                                                                                              | Pectinesterase inhibitor domain [IPRO06501] (1)                                                                                                                                                                                                                                                                                                              |                                  |                             | P_trifoliata_00319_miRNA_24,1   |
| GF0047832 | 0                             | 0                        | 1                            | Hypothetical protein (1)                                              |                                                                                                                                                                                                                                                                                                                                                                                                                                                                                                                                            |                                                                                                                                                                                                                                                                                                                                                              |                                  |                             | P_trifoliata_00319_miRNA_22,1   |
| GF0047831 | 0                             | 0                        | 1                            | Hypothetical protein (1)                                              |                                                                                                                                                                                                                                                                                                                                                                                                                                                                                                                                            |                                                                                                                                                                                                                                                                                                                                                              |                                  |                             | P_trifoliata_00319_miRNA_2,1    |
| GF0047830 | 0                             | 0                        | 1                            | Hypothetical protein (1)                                              |                                                                                                                                                                                                                                                                                                                                                                                                                                                                                                                                            |                                                                                                                                                                                                                                                                                                                                                              |                                  |                             | P_trifoliata_00319_miRNA_19,1   |
| GF0047829 | 0                             | 0                        | 1                            | Hypothetical protein (1)                                              |                                                                                                                                                                                                                                                                                                                                                                                                                                                                                                                                            |                                                                                                                                                                                                                                                                                                                                                              |                                  |                             | P_trifoliata_00319_miRNA_14,1   |
| GF0047828 | 0                             | 0                        | 1                            | Hypothetical protein (1)                                              |                                                                                                                                                                                                                                                                                                                                                                                                                                                                                                                                            |                                                                                                                                                                                                                                                                                                                                                              |                                  |                             | P_trifoliata_00319_miRNA_10,1   |
| GF0047827 | 0                             | 0                        | 1                            | Hypothetical protein (1)                                              |                                                                                                                                                                                                                                                                                                                                                                                                                                                                                                                                            |                                                                                                                                                                                                                                                                                                                                                              |                                  |                             | P_trifoliata_00319_miRNA_1,1    |

| ID        | Num. in <i>C. celeratae</i> | Num. in <i>C. unihii</i> | Num. in <i>P. trifoliata</i> | Note                                                          | GO                                                                                                                                                                                                                                                                                                                                                                                                                                                                                                         | InterPro                                                                                                                                                                                                                                                                            | Members in <i>C. celeratae</i> | Members in <i>C. unihii</i> | Members in <i>P. trifoliata</i> |
|-----------|-----------------------------|--------------------------|------------------------------|---------------------------------------------------------------|------------------------------------------------------------------------------------------------------------------------------------------------------------------------------------------------------------------------------------------------------------------------------------------------------------------------------------------------------------------------------------------------------------------------------------------------------------------------------------------------------------|-------------------------------------------------------------------------------------------------------------------------------------------------------------------------------------------------------------------------------------------------------------------------------------|--------------------------------|-----------------------------|---------------------------------|
| GF0047826 | 0                           | 0                        | 1                            | Hypothetical protein (1)                                      |                                                                                                                                                                                                                                                                                                                                                                                                                                                                                                            | Domain of unknown function DUF4283 [IPR025558] (1)                                                                                                                                                                                                                                  | -                              | -                           | P_trifoliata_00318_mRNA_5,1     |
| GF0047825 | 0                           | 0                        | 1                            | Hypothetical protein (1)                                      | nucleic acid binding [GO:0003676 molecular_function] (1)                                                                                                                                                                                                                                                                                                                                                                                                                                                   | Ribonuclease H-like domain [IPR012337] (1)                                                                                                                                                                                                                                          | -                              | -                           | P_trifoliata_00318_mRNA_4,1     |
| GF0047824 | 0                           | 0                        | 1                            | Hypothetical protein (1)                                      |                                                                                                                                                                                                                                                                                                                                                                                                                                                                                                            |                                                                                                                                                                                                                                                                                     | -                              | -                           | P_trifoliata_00318_mRNA_24,1    |
| GF0047823 | 0                           | 0                        | 1                            | Hypothetical protein (1)                                      |                                                                                                                                                                                                                                                                                                                                                                                                                                                                                                            |                                                                                                                                                                                                                                                                                     | -                              | -                           | P_trifoliata_00318_mRNA_23,1    |
| GF0047822 | 0                           | 0                        | 1                            | Hypothetical protein (1)                                      |                                                                                                                                                                                                                                                                                                                                                                                                                                                                                                            | Gag polyprotein of LTR copia-type [IPR029472] (1)                                                                                                                                                                                                                                   | -                              | -                           | P_trifoliata_00318_mRNA_19,1    |
| GF0047821 | 0                           | 0                        | 1                            | TTF-type zinc finger protein with HAT dimerisation domain (1) |                                                                                                                                                                                                                                                                                                                                                                                                                                                                                                            | Zinc finger, TTF-type [IPR006580] (1); Domain of unknown function DUF4371 [IPR025398] (1)                                                                                                                                                                                           | -                              | -                           | P_trifoliata_00318_mRNA_17,1    |
| GF0047820 | 0                           | 0                        | 1                            | Hypothetical protein (1)                                      |                                                                                                                                                                                                                                                                                                                                                                                                                                                                                                            |                                                                                                                                                                                                                                                                                     | -                              | -                           | P_trifoliata_00318_mRNA_13,1    |
| GF0047819 | 0                           | 0                        | 1                            | Hypothetical protein (1)                                      |                                                                                                                                                                                                                                                                                                                                                                                                                                                                                                            |                                                                                                                                                                                                                                                                                     | -                              | -                           | P_trifoliata_00318_mRNA_1,1     |
| GF0047818 | 0                           | 0                        | 1                            | Hypothetical protein (1)                                      | ADP binding [GO:0043531 molecular_function] (1)                                                                                                                                                                                                                                                                                                                                                                                                                                                            | P-loop containing nucleoside triphosphate hydrolase [IPR027417] (1); NB-ARC [IPR002182] (1)                                                                                                                                                                                         | -                              | -                           | P_trifoliata_00317_mRNA_7,1     |
| GF0047817 | 0                           | 0                        | 1                            | Hypothetical protein (1)                                      |                                                                                                                                                                                                                                                                                                                                                                                                                                                                                                            |                                                                                                                                                                                                                                                                                     | -                              | -                           | P_trifoliata_00317_mRNA_3,1     |
| GF0047816 | 0                           | 0                        | 1                            | Hypothetical protein (1)                                      |                                                                                                                                                                                                                                                                                                                                                                                                                                                                                                            |                                                                                                                                                                                                                                                                                     | -                              | -                           | P_trifoliata_00317_mRNA_23,1    |
| GF0047815 | 0                           | 0                        | 1                            | Hypothetical protein (1)                                      |                                                                                                                                                                                                                                                                                                                                                                                                                                                                                                            |                                                                                                                                                                                                                                                                                     | -                              | -                           | P_trifoliata_00317_mRNA_22,1    |
| GF0047814 | 0                           | 0                        | 1                            | Hypothetical protein (1)                                      | nucleic acid binding [GO:0003676 molecular_function] (1)                                                                                                                                                                                                                                                                                                                                                                                                                                                   | Ribonuclease H-like domain [IPR012337] (1)                                                                                                                                                                                                                                          | -                              | -                           | P_trifoliata_00317_mRNA_19,1    |
| GF0047813 | 0                           | 0                        | 1                            | ABC transporter B family member 22 (1)                        | biological_process [GO:0006810 biological_process] (1); ATPase activity, coupled to transmembrane movement of substances [GO:0042626 molecular_function] (1); transmembrane transport [GO:0055505 biological_process] (1); ATP binding [GO:0005524 molecular_function] (1)                                                                                                                                                                                                                                 | ABC transporter type 1, transmembrane domain [IPR011527] (1)                                                                                                                                                                                                                        | -                              | -                           | P_trifoliata_00317_mRNA_18,1    |
| GF0047812 | 0                           | 0                        | 1                            | Hypothetical protein (1)                                      |                                                                                                                                                                                                                                                                                                                                                                                                                                                                                                            |                                                                                                                                                                                                                                                                                     | -                              | -                           | P_trifoliata_00317_mRNA_12,1    |
| GF0047811 | 0                           | 0                        | 1                            | Hypothetical protein (1)                                      |                                                                                                                                                                                                                                                                                                                                                                                                                                                                                                            |                                                                                                                                                                                                                                                                                     | -                              | -                           | P_trifoliata_00317_mRNA_10,1    |
| GF0047810 | 0                           | 0                        | 1                            | Hypothetical protein (1)                                      |                                                                                                                                                                                                                                                                                                                                                                                                                                                                                                            |                                                                                                                                                                                                                                                                                     | -                              | -                           | P_trifoliata_00316_mRNA_5,1     |
| GF0047809 | 0                           | 0                        | 1                            | Dual specificity phosphatase domain protein (1)               | dephosphorylation [GO:0016511 biological_process] (1); protein dephosphorylation [GO:0006470 biological_process] (1); phosphatase activity [GO:0016791 molecular_function] (1); protein tyrosine/serine/threonine phosphatase activity [GO:0008138 molecular_function] (1)                                                                                                                                                                                                                                 | Protein-tyrosine phosphatase-like [IPR029021] (1); Tyrosine-specific protein phosphatases domain [IPR000387] (1); Dual specificity phosphatase [IPR024950] (1); Dual specificity phosphatase, catalytic domain [IPR000340] (1)                                                      | -                              | -                           | P_trifoliata_00316_mRNA_2,1     |
| GF0047808 | 0                           | 0                        | 1                            | 4'-phosphopantetheinyl transferase family protein (1)         | 4'-phosphopantetheinyl transferase family activity [GO:0008897 molecular_function] (1); magnesium ion binding [GO:0000287 molecular_function] (1)                                                                                                                                                                                                                                                                                                                                                          | 4'-phosphopantetheinyl transferase superfamily [IPR008278] (1)                                                                                                                                                                                                                      | -                              | -                           | P_trifoliata_00316_mRNA_1,3     |
| GF0047807 | 0                           | 0                        | 1                            | Hypothetical protein (1)                                      | transferase activity, transferring glycosyl group [GO:0016757 molecular_function] (1)                                                                                                                                                                                                                                                                                                                                                                                                                      | Glycosyltransferase AER61, uncharacterised [IPR007657] (1)                                                                                                                                                                                                                          | -                              | -                           | P_trifoliata_00315_mRNA_9,1     |
| GF0047806 | 0                           | 0                        | 1                            | Hypothetical protein (1)                                      |                                                                                                                                                                                                                                                                                                                                                                                                                                                                                                            |                                                                                                                                                                                                                                                                                     | -                              | -                           | P_trifoliata_00315_mRNA_33,1    |
| GF0047805 | 0                           | 0                        | 1                            | Leucine-rich repeat receptor protein kinase EXS (1)           | protein binding [GO:0005515 molecular_function] (1)                                                                                                                                                                                                                                                                                                                                                                                                                                                        | Leucine rich repeat 4 [IPR025875] (1); Leucine-rich repeat domain, L domain-like [IPR032675] (1); Leucine-rich repeat [IPR001611] (1)                                                                                                                                               | -                              | -                           | P_trifoliata_00315_mRNA_31,1    |
| GF0047804 | 0                           | 0                        | 1                            | LRR receptor-like serine/threonine-protein kinase HSL2 (1)    |                                                                                                                                                                                                                                                                                                                                                                                                                                                                                                            | Leucine-rich repeat domain, L domain-like [IPR02675] (1)                                                                                                                                                                                                                            | -                              | -                           | P_trifoliata_00315_mRNA_26,1    |
| GF0047803 | 0                           | 0                        | 1                            | Hypothetical protein (1)                                      |                                                                                                                                                                                                                                                                                                                                                                                                                                                                                                            |                                                                                                                                                                                                                                                                                     | -                              | -                           | P_trifoliata_00315_mRNA_12,1    |
| GF0047802 | 0                           | 0                        | 1                            | Hypothetical protein (1)                                      |                                                                                                                                                                                                                                                                                                                                                                                                                                                                                                            |                                                                                                                                                                                                                                                                                     | -                              | -                           | P_trifoliata_00315_mRNA_1,1     |
| GF0047801 | 0                           | 0                        | 1                            | Cytochrome P450 82A4 (1)                                      | rRNA processing [GO:0008033 biological_process] (1); RNA binding [GO:0001723 molecular_function] (1); oxidation-reduction process [GO:0055114 biological_process] (1); oxidoreductase activity, acting on paired donors, with incorporation or reduction of molecular oxygen [GO:0016705 molecular_function] (1); rRNA (guanine N2)-methyltransferase activity [GO:0004809 molecular_function] (1); iron ion binding [GO:0005506 molecular_function] (1); heme binding [GO:0002037 molecular_function] (1) | S-adenosyl-L-methionine-dependent methyltransferase [IPR029063] (1); Cytochrome P450, C-class, group 1 [IPR002401] (1); Cytochrome P450 [IPR001123] (1); rRNA methyltransferase, Trm1 [IPR002905] (1)                                                                               | -                              | -                           | P_trifoliata_00314_mRNA_7,1     |
| GF0047800 | 0                           | 0                        | 1                            | Hypothetical protein (1)                                      |                                                                                                                                                                                                                                                                                                                                                                                                                                                                                                            |                                                                                                                                                                                                                                                                                     | -                              | -                           | P_trifoliata_00314_mRNA_5,1     |
| GF0047799 | 0                           | 0                        | 1                            | Hypothetical protein (1)                                      |                                                                                                                                                                                                                                                                                                                                                                                                                                                                                                            |                                                                                                                                                                                                                                                                                     | -                              | -                           | P_trifoliata_00314_mRNA_42,1    |
| GF0047798 | 0                           | 0                        | 1                            | Hypothetical protein (1)                                      |                                                                                                                                                                                                                                                                                                                                                                                                                                                                                                            |                                                                                                                                                                                                                                                                                     | -                              | -                           | P_trifoliata_00314_mRNA_35,1    |
| GF0047797 | 0                           | 0                        | 1                            | Hypothetical protein (1)                                      |                                                                                                                                                                                                                                                                                                                                                                                                                                                                                                            |                                                                                                                                                                                                                                                                                     | -                              | -                           | P_trifoliata_00314_mRNA_3,1     |
| GF0047796 | 0                           | 0                        | 1                            | Endoglucanase (1)                                             | carbohydrate metabolic process [GO:0005975 biological_process] (1); catalytic activity [GO:0003824 molecular_function] (1); hydrolase activity, hydrolyzing O-glycosyl compounds [GO:0004553 molecular_function] (1)                                                                                                                                                                                                                                                                                       | Six-hairpin glycosidase-like [IPR008928] (1); Six-hairpin glycosidase [IPR012341] (1); Glycoside hydrolase family 9 [IPR001701] (1)                                                                                                                                                 | -                              | -                           | P_trifoliata_00314_mRNA_28,1    |
| GF0047795 | 0                           | 0                        | 1                            | Hypothetical protein (1)                                      |                                                                                                                                                                                                                                                                                                                                                                                                                                                                                                            |                                                                                                                                                                                                                                                                                     | -                              | -                           | P_trifoliata_00314_mRNA_24,1    |
| GF0047794 | 0                           | 0                        | 1                            | Hypothetical protein (1)                                      |                                                                                                                                                                                                                                                                                                                                                                                                                                                                                                            | Reverse transcriptase domain [IPR004077] (1)                                                                                                                                                                                                                                        | -                              | -                           | P_trifoliata_00314_mRNA_22,1    |
| GF0047793 | 0                           | 0                        | 1                            | Hypothetical protein (1)                                      |                                                                                                                                                                                                                                                                                                                                                                                                                                                                                                            | Domain of unknown function DUF4283 [IPR025558] (1); Endonuclease/exonuclease/phosphatase [IPR06135] (1)                                                                                                                                                                             | -                              | -                           | P_trifoliata_00314_mRNA_20,1    |
| GF0047792 | 0                           | 0                        | 1                            | Hypothetical protein (1)                                      | catalytic activity [GO:0003824 molecular_function] (1)                                                                                                                                                                                                                                                                                                                                                                                                                                                     | PLP-binding barrel [IPR029066] (1); Orn/DAP/Arg decarboxylase 2, N-terminal [IPR022644] (1)                                                                                                                                                                                         | -                              | -                           | P_trifoliata_00314_mRNA_19,1    |
| GF0047791 | 0                           | 0                        | 1                            | Cytochrome p450 79a2, putative (1)                            | heme binding [GO:0020037 molecular_function] (1); iron ion binding [GO:0005506 molecular_function] (1); oxidation-reduction process [GO:0055114 biological_process] (1); oxidoreductase activity, acting on paired donors, with incorporation or reduction of molecular oxygen [GO:0016705 molecular_function] (1)                                                                                                                                                                                         | Cytochrome P450 [IPR001128] (1)                                                                                                                                                                                                                                                     | -                              | -                           | P_trifoliata_00314_mRNA_18,1    |
| GF0047790 | 0                           | 0                        | 1                            | Hypothetical protein (1)                                      | catalytic activity [GO:0003824 molecular_function] (1); polyamine biosynthetic process [GO:0006996 biological_process] (1)                                                                                                                                                                                                                                                                                                                                                                                 | PLP-binding barrel [IPR029066] (1); Orn/DAP/Arg decarboxylase 2, N-terminal [IPR022644] (1); Ornithine decarboxylase [IPR002453] (1)                                                                                                                                                | -                              | -                           | P_trifoliata_00314_mRNA_17,1    |
| GF0047789 | 0                           | 0                        | 1                            | Hypothetical protein (1)                                      | plant type cell wall organization [GO:0008664 biological_process] (1); extracellular region [GO:0005576 cellular_component] (1)                                                                                                                                                                                                                                                                                                                                                                            | Expansin/Lol pl [IPR007118] (1); Expansin [IPR029263] (1); Expansin, cellulose-binding-like domain [IPR007117] (1); RlpA-like double-psi beta-barrel domain [IPR009009] (1); Macro domain [IPR002589] (1); Expansin pollen allergen, DPFB domain [IPR007112] (1)                    | -                              | -                           | P_trifoliata_00314_mRNA_13,1    |
| GF0047788 | 0                           | 0                        | 1                            | Hypothetical protein (1)                                      |                                                                                                                                                                                                                                                                                                                                                                                                                                                                                                            | Histone acetyltransferases subunit 3 [IPR019340] (1)                                                                                                                                                                                                                                | -                              | -                           | P_trifoliata_00314_mRNA_1,1     |
| GF0047787 | 0                           | 0                        | 1                            | Hypothetical protein (1)                                      |                                                                                                                                                                                                                                                                                                                                                                                                                                                                                                            |                                                                                                                                                                                                                                                                                     | -                              | -                           | P_trifoliata_00313_mRNA_22,1    |
| GF0047786 | 0                           | 0                        | 1                            | Hypothetical protein (1)                                      |                                                                                                                                                                                                                                                                                                                                                                                                                                                                                                            |                                                                                                                                                                                                                                                                                     | -                              | -                           | P_trifoliata_00313_mRNA_19,1    |
| GF0047785 | 0                           | 0                        | 1                            | Hypothetical protein (1)                                      |                                                                                                                                                                                                                                                                                                                                                                                                                                                                                                            |                                                                                                                                                                                                                                                                                     | -                              | -                           | P_trifoliata_00313_mRNA_11,1    |
| GF0047784 | 0                           | 0                        | 1                            | Hypothetical protein (1)                                      |                                                                                                                                                                                                                                                                                                                                                                                                                                                                                                            |                                                                                                                                                                                                                                                                                     | -                              | -                           | P_trifoliata_00313_mRNA_1,1     |
| GF0047783 | 0                           | 0                        | 1                            | Hypothetical protein (1)                                      |                                                                                                                                                                                                                                                                                                                                                                                                                                                                                                            |                                                                                                                                                                                                                                                                                     | -                              | -                           | P_trifoliata_00312_mRNA_9,1     |
| GF0047782 | 0                           | 0                        | 1                            | Hypothetical protein (1)                                      |                                                                                                                                                                                                                                                                                                                                                                                                                                                                                                            |                                                                                                                                                                                                                                                                                     | -                              | -                           | P_trifoliata_00312_mRNA_8,1     |
| GF0047781 | 0                           | 0                        | 1                            | Hypothetical protein (1)                                      |                                                                                                                                                                                                                                                                                                                                                                                                                                                                                                            |                                                                                                                                                                                                                                                                                     | -                              | -                           | P_trifoliata_00312_mRNA_7,1     |
| GF0047780 | 0                           | 0                        | 1                            | FAD-binding Berberine family protein (1)                      | oxidoreductase activity, acting on CH-OH group of donors [GO:0016614 molecular_function] (1); catalytic activity [GO:0003824 molecular_function] (1); oxidoreductase activity [GO:0016491 molecular_function] (1); oxidation-reduction process [GO:0055114 biological_process] (1); flavin adenine dinucleotide binding [GO:0005660 molecular_function] (1)                                                                                                                                                | FAD-binding, type 2 [IPR016166] (1); FAD linked oxidase, N-terminal [IPR006094] (1); CO dehydrogenase haemoprotein-like FAD-binding, subdomain 2 [IPR016169] (1); FAD-binding, type 2, subdomain 1 [IPR016167] (1); Oxygen oxidoreductase covalent FAD-binding site [IPR006093] (1) | -                              | -                           | P_trifoliata_00312_mRNA_4,1     |
| GF0047779 | 0                           | 0                        | 1                            | Hypothetical protein (1)                                      |                                                                                                                                                                                                                                                                                                                                                                                                                                                                                                            | Retrotroposon gag domain [IPR005162] (1)                                                                                                                                                                                                                                            | -                              | -                           | P_trifoliata_00312_mRNA_3,1     |
| GF0047778 | 0                           | 0                        | 1                            | Hypothetical protein (1)                                      |                                                                                                                                                                                                                                                                                                                                                                                                                                                                                                            |                                                                                                                                                                                                                                                                                     | -                              | -                           | P_trifoliata_00312_mRNA_2,1     |
| GF0047777 | 0                           | 0                        | 1                            | Hypothetical protein (1)                                      |                                                                                                                                                                                                                                                                                                                                                                                                                                                                                                            |                                                                                                                                                                                                                                                                                     | -                              | -                           | P_trifoliata_00312_mRNA_17,1    |
| GF0047776 | 0                           | 0                        | 1                            | Hypothetical protein (1)                                      |                                                                                                                                                                                                                                                                                                                                                                                                                                                                                                            |                                                                                                                                                                                                                                                                                     | -                              | -                           | P_trifoliata_00312_mRNA_16,1    |
| GF0047775 | 0                           | 0                        | 1                            | Hypothetical protein (1)                                      |                                                                                                                                                                                                                                                                                                                                                                                                                                                                                                            |                                                                                                                                                                                                                                                                                     | -                              | -                           | P_trifoliata_00312_mRNA_15,1    |
| GF0047774 | 0                           | 0                        | 1                            | Hypothetical protein (1)                                      | cysteine-type peptidase activity [GO:0008234 molecular_function] (1); proteolysis [GO:0006508 biological_process] (1)                                                                                                                                                                                                                                                                                                                                                                                      | Ulp1 protease family, C-terminal catalytic domain [IPR003653] (1); Domain of unknown function DUF4218 [IPR025452] (1)                                                                                                                                                               | -                              | -                           | P_trifoliata_00312_mRNA_14,1    |
| GF0047773 | 0                           | 0                        | 1                            | Hypothetical protein (1)                                      |                                                                                                                                                                                                                                                                                                                                                                                                                                                                                                            |                                                                                                                                                                                                                                                                                     | -                              | -                           | P_trifoliata_00312_mRNA_10,1    |



| ID       | Num. in <i>C. celeratae</i> | Num. in <i>C. canthii</i> | Num. in <i>P. trifoliata</i> | Note                                                             | GO                                                                                                                                                                                                                                                                       | InterPro                                                                                                                                                                                                                                                                         | Members in <i>C. celeratae</i> | Members in <i>C. canthii</i> | Members in <i>P. trifoliata</i> |
|----------|-----------------------------|---------------------------|------------------------------|------------------------------------------------------------------|--------------------------------------------------------------------------------------------------------------------------------------------------------------------------------------------------------------------------------------------------------------------------|----------------------------------------------------------------------------------------------------------------------------------------------------------------------------------------------------------------------------------------------------------------------------------|--------------------------------|------------------------------|---------------------------------|
| GF004772 | 0                           | 0                         | 1                            | Hypothetical protein (1)                                         | O-methyltransferase activity [GO:0008171 molecular_function] (1); methyltransferase activity [GO:0008168 molecular_function] (1)                                                                                                                                         | S-adenosyl-L-methionine-dependent methyltransferase [IPR020633] (1); O-methyltransferase, family 2 [IPR01077] (1); O-methyltransferase COMT-type [IPR01646] (1)                                                                                                                  | -                              | -                            | P_trifoliata_00312_mRNA_1.1     |
| GF004771 | 0                           | 0                         | 1                            | Hypothetical protein (1)                                         |                                                                                                                                                                                                                                                                          | Domain of unknown function DUF642 [IPR06946] (1)                                                                                                                                                                                                                                 | -                              | -                            | P_trifoliata_00311_mRNA_6.1     |
| GF004770 | 0                           | 0                         | 1                            | Hypothetical protein (1)                                         |                                                                                                                                                                                                                                                                          | Endonuclease/exonuclease/phosphatase [IPR005135] (1)                                                                                                                                                                                                                             | -                              | -                            | P_trifoliata_00311_mRNA_3.1     |
| GF004769 | 0                           | 0                         | 1                            | Hypothetical protein (1)                                         |                                                                                                                                                                                                                                                                          | -                                                                                                                                                                                                                                                                                | -                              | -                            | P_trifoliata_00311_mRNA_27.1    |
| GF004768 | 0                           | 0                         | 1                            | Hypothetical protein (1)                                         |                                                                                                                                                                                                                                                                          | -                                                                                                                                                                                                                                                                                | -                              | -                            | P_trifoliata_00311_mRNA_25.1    |
| GF004767 | 0                           | 0                         | 1                            | Hypothetical protein (1)                                         |                                                                                                                                                                                                                                                                          | -                                                                                                                                                                                                                                                                                | -                              | -                            | P_trifoliata_00311_mRNA_13.1    |
| GF004766 | 0                           | 0                         | 1                            | Hypothetical protein (1)                                         |                                                                                                                                                                                                                                                                          | -                                                                                                                                                                                                                                                                                | -                              | -                            | P_trifoliata_00310_mRNA_5.1     |
| GF004765 | 0                           | 0                         | 1                            | Hypothetical protein (1)                                         |                                                                                                                                                                                                                                                                          | -                                                                                                                                                                                                                                                                                | -                              | -                            | P_trifoliata_00310_mRNA_36.1    |
| GF004764 | 0                           | 0                         | 1                            | Hypothetical protein (1)                                         | ATP binding [GO:0005524 molecular_function] (1); protein kinase activity [GO:000472 molecular_function] (1); protein phosphorylation [GO:0006468 biological_process] (1)                                                                                                 | Protein kinase domain [IPR000719] (1); Protein kinase-like domain [IPR011009] (1); Tyrosine-protein kinase, active site [IPR008266] (1)                                                                                                                                          | -                              | -                            | P_trifoliata_00310_mRNA_30.1    |
| GF004763 | 0                           | 0                         | 1                            | Hypothetical protein (1)                                         |                                                                                                                                                                                                                                                                          | Domain of unknown function DUF4283 [IPR025558] (1)                                                                                                                                                                                                                               | -                              | -                            | P_trifoliata_00310_mRNA_27.1    |
| GF004762 | 0                           | 0                         | 1                            | Hypothetical protein (1)                                         |                                                                                                                                                                                                                                                                          | -                                                                                                                                                                                                                                                                                | -                              | -                            | P_trifoliata_00310_mRNA_25.1    |
| GF004761 | 0                           | 0                         | 1                            | Hypothetical protein (1)                                         |                                                                                                                                                                                                                                                                          | -                                                                                                                                                                                                                                                                                | -                              | -                            | P_trifoliata_00310_mRNA_24.1    |
| GF004760 | 0                           | 0                         | 1                            | Hypothetical protein (1)                                         |                                                                                                                                                                                                                                                                          | -                                                                                                                                                                                                                                                                                | -                              | -                            | P_trifoliata_00310_mRNA_22.1    |
| GF004759 | 0                           | 0                         | 1                            | Hypothetical protein (1)                                         |                                                                                                                                                                                                                                                                          | -                                                                                                                                                                                                                                                                                | -                              | -                            | P_trifoliata_00310_mRNA_19.1    |
| GF004758 | 0                           | 0                         | 1                            | Hypothetical protein (1)                                         |                                                                                                                                                                                                                                                                          | -                                                                                                                                                                                                                                                                                | -                              | -                            | P_trifoliata_00310_mRNA_16.1    |
| GF004757 | 0                           | 0                         | 1                            | Hypothetical protein (1)                                         |                                                                                                                                                                                                                                                                          | -                                                                                                                                                                                                                                                                                | -                              | -                            | P_trifoliata_00310_mRNA_15.1    |
| GF004756 | 0                           | 0                         | 1                            | Hypothetical protein (1)                                         | nucleic acid binding [GO:0003676 molecular_function] (1)                                                                                                                                                                                                                 | Ribonuclease H-like domain [IPR012337] (1)                                                                                                                                                                                                                                       | -                              | -                            | P_trifoliata_00310_mRNA_14.1    |
| GF004755 | 0                           | 0                         | 1                            | Hypothetical protein (1)                                         |                                                                                                                                                                                                                                                                          | -                                                                                                                                                                                                                                                                                | -                              | -                            | P_trifoliata_00310_mRNA_13.1    |
| GF004754 | 0                           | 0                         | 1                            | Hypothetical protein (1)                                         |                                                                                                                                                                                                                                                                          | -                                                                                                                                                                                                                                                                                | -                              | -                            | P_trifoliata_00310_mRNA_12.1    |
| GF004753 | 0                           | 0                         | 1                            | Hypothetical protein (1)                                         |                                                                                                                                                                                                                                                                          | -                                                                                                                                                                                                                                                                                | -                              | -                            | P_trifoliata_00310_mRNA_11.1    |
| GF004752 | 0                           | 0                         | 1                            | Hypothetical protein (1)                                         |                                                                                                                                                                                                                                                                          | -                                                                                                                                                                                                                                                                                | -                              | -                            | P_trifoliata_00310_mRNA_10.1    |
| GF004751 | 0                           | 0                         | 1                            | Hypothetical protein (1)                                         |                                                                                                                                                                                                                                                                          | -                                                                                                                                                                                                                                                                                | -                              | -                            | P_trifoliata_00309_mRNA_9.1     |
| GF004750 | 0                           | 0                         | 1                            | Transcription factor BHLH16 (1)                                  | DNA binding [GO:0003677 molecular_function] (1); protein dimerization activity [GO:0046983 molecular_function] (1)                                                                                                                                                       | Achaete-scute transcription factor-related domain [IPR015660] (1); Myc-type, basic helix-loop-helix (bHLH) domain [IPR011598] (1)                                                                                                                                                | -                              | -                            | P_trifoliata_00309_mRNA_8.1     |
| GF004749 | 0                           | 0                         | 1                            | Hypothetical protein (1)                                         | protein dimerization activity [GO:0046983 molecular_function] (1); DNA binding [GO:0003677 molecular_function] (1)                                                                                                                                                       | Myc-type, basic helix-loop-helix (bHLH) domain [IPR011598] (1); Achaete-scute transcription factor-related [IPR015660] (1)                                                                                                                                                       | -                              | -                            | P_trifoliata_00309_mRNA_7.1     |
| GF004748 | 0                           | 0                         | 1                            | Hypothetical protein (1)                                         |                                                                                                                                                                                                                                                                          | Protein of unknown function DM15 [IPR006607] (1)                                                                                                                                                                                                                                 | -                              | -                            | P_trifoliata_00309_mRNA_36.1    |
| GF004747 | 0                           | 0                         | 1                            | Hypothetical protein (1)                                         |                                                                                                                                                                                                                                                                          | -                                                                                                                                                                                                                                                                                | -                              | -                            | P_trifoliata_00309_mRNA_35.1    |
| GF004746 | 0                           | 0                         | 1                            | Late embryogenesis abundant hydroxyproline-rich glycoprotein (1) |                                                                                                                                                                                                                                                                          | Late embryogenesis abundant protein, LEA-14 [IPR004864] (1)                                                                                                                                                                                                                      | -                              | -                            | P_trifoliata_00309_mRNA_28.1    |
| GF004745 | 0                           | 0                         | 1                            | Hypothetical protein (1)                                         |                                                                                                                                                                                                                                                                          | -                                                                                                                                                                                                                                                                                | -                              | -                            | P_trifoliata_00309_mRNA_2.1     |
| GF004744 | 0                           | 0                         | 1                            | 1-aminocyclopropane-1-carboxylate oxidase like 6 (1)             | oxidoreductase activity [GO:0016491 molecular_function] (1); oxidation-reduction process [GO:0055114 biological_process] (1)                                                                                                                                             | Isopenicillin N synthase-like [IPR027443] (1); Oxophthalate/iron-dependent dioxygenase [IPR005123] (1)                                                                                                                                                                           | -                              | -                            | P_trifoliata_00309_mRNA_17.1    |
| GF004743 | 0                           | 0                         | 1                            | Molybdopterin synthase catalytic subunit (1)                     | molybdopterin synthase activity [GO:0003666 molecular_function] (1); Mo-molybdopterin cofactor biosynthetic process [GO:0006777 biological_process] (1); molybdopterin synthase complex [GO:0019008 cellular_component] (1); cytosol [GO:0005829 cellular_component] (1) | Molybdopterin synthase catalytic subunit, eukaryotes [IPR028888] (1); Molybdopterin biosynthesis MoAE [IPR005448] (1)                                                                                                                                                            | -                              | -                            | P_trifoliata_00309_mRNA_14.1    |
| GF004742 | 0                           | 0                         | 1                            | Hypothetical protein (1)                                         | protein dimerization activity [GO:0046983 molecular_function] (1)                                                                                                                                                                                                        | Myc-type, basic helix-loop-helix (bHLH) domain [IPR011598] (1)                                                                                                                                                                                                                   | -                              | -                            | P_trifoliata_00309_mRNA_10.1    |
| GF004741 | 0                           | 0                         | 1                            | Polygalacturonase (1)                                            | carbohydrate metabolic process [GO:000975 biological_process] (1); polygalacturonase activity [GO:0004650 molecular_function] (1)                                                                                                                                        | Glycoside hydrolase, family 28 [IPR000743] (1); Parallel beta-helix repeat [IPR006626] (1); Pectin lyase fold-violence factor [IPR011050] (1); Pectin lyase fold [IPR012334] (1)                                                                                                 | -                              | -                            | P_trifoliata_00309_mRNA_1.1     |
| GF004740 | 0                           | 0                         | 1                            | Hypothetical protein (1)                                         |                                                                                                                                                                                                                                                                          | -                                                                                                                                                                                                                                                                                | -                              | -                            | P_trifoliata_00308_mRNA_9.1     |
| GF004739 | 0                           | 0                         | 1                            | Hypothetical protein (1)                                         |                                                                                                                                                                                                                                                                          | -                                                                                                                                                                                                                                                                                | -                              | -                            | P_trifoliata_00308_mRNA_6.1     |
| GF004738 | 0                           | 0                         | 1                            | Hypothetical protein (1)                                         |                                                                                                                                                                                                                                                                          | -                                                                                                                                                                                                                                                                                | -                              | -                            | P_trifoliata_00308_mRNA_31.1    |
| GF004737 | 0                           | 0                         | 1                            | Hypothetical protein (1)                                         |                                                                                                                                                                                                                                                                          | -                                                                                                                                                                                                                                                                                | -                              | -                            | P_trifoliata_00308_mRNA_30.1    |
| GF004736 | 0                           | 0                         | 1                            | Hypothetical protein (1)                                         | asparagine synthase (glutamine-hydrolyzing) activity [GO:0004066 molecular_function] (1); asparagine biosynthetic process [GO:0006529 biological_process] (1)                                                                                                            | Reverse transcriptase zinc-binding domain [IPR020960] (1); Glutamine amidotransferase type 2 domain [IPR017932] (1); Rossmann-like alpha-beta-alpha sandwich fold [IPR014729] (1); Asparagine synthase [IPR001962] (1); Nucleophilic amidohydrolases, N-terminal [IPR020955] (1) | -                              | -                            | P_trifoliata_00308_mRNA_25.1    |
| GF004735 | 0                           | 0                         | 1                            | Hypothetical protein (1)                                         |                                                                                                                                                                                                                                                                          | -                                                                                                                                                                                                                                                                                | -                              | -                            | P_trifoliata_00308_mRNA_17.1    |
| GF004734 | 0                           | 0                         | 1                            | Hypothetical protein (1)                                         |                                                                                                                                                                                                                                                                          | MULE transposase domain [IPR018289] (1)                                                                                                                                                                                                                                          | -                              | -                            | P_trifoliata_00308_mRNA_11.1    |
| GF004733 | 0                           | 0                         | 1                            | Hypothetical protein (1)                                         |                                                                                                                                                                                                                                                                          | PGC domain [IPR026961] (1)                                                                                                                                                                                                                                                       | -                              | -                            | P_trifoliata_00307_mRNA_36.1    |
| GF004732 | 0                           | 0                         | 1                            | Ankyrin repeat family protein, putative (1)                      |                                                                                                                                                                                                                                                                          | PGC domain [IPR026961] (1); Ankyrin repeat-containing domain [IPR020683] (1)                                                                                                                                                                                                     | -                              | -                            | P_trifoliata_00307_mRNA_35.1    |
| GF004731 | 0                           | 0                         | 1                            | Hypothetical protein (1)                                         |                                                                                                                                                                                                                                                                          | -                                                                                                                                                                                                                                                                                | -                              | -                            | P_trifoliata_00307_mRNA_31.1    |
| GF004730 | 0                           | 0                         | 1                            | Hypothetical protein (1)                                         |                                                                                                                                                                                                                                                                          | -                                                                                                                                                                                                                                                                                | -                              | -                            | P_trifoliata_00307_mRNA_3.1     |
| GF004729 | 0                           | 0                         | 1                            | Hypothetical protein (1)                                         |                                                                                                                                                                                                                                                                          | -                                                                                                                                                                                                                                                                                | -                              | -                            | P_trifoliata_00307_mRNA_27.1    |
| GF004728 | 0                           | 0                         | 1                            | Hypothetical protein (1)                                         |                                                                                                                                                                                                                                                                          | -                                                                                                                                                                                                                                                                                | -                              | -                            | P_trifoliata_00307_mRNA_26.1    |
| GF004727 | 0                           | 0                         | 1                            | Pentatricopeptide repeat-containing family protein (1)           | protein binding [GO:0005515 molecular_function] (1)                                                                                                                                                                                                                      | Pentatricopeptide repeat [IPR002885] (1); Tetratricopeptide-like helical domain [IPR011990] (1)                                                                                                                                                                                  | -                              | -                            | P_trifoliata_00307_mRNA_15.1    |
| GF004726 | 0                           | 0                         | 1                            | Hypothetical protein (1)                                         |                                                                                                                                                                                                                                                                          | -                                                                                                                                                                                                                                                                                | -                              | -                            | P_trifoliata_00307_mRNA_12.1    |
| GF004725 | 0                           | 0                         | 1                            | Hypothetical protein (1)                                         |                                                                                                                                                                                                                                                                          | -                                                                                                                                                                                                                                                                                | -                              | -                            | P_trifoliata_00307_mRNA_1.1     |
| GF004724 | 0                           | 0                         | 1                            | Hypothetical protein (1)                                         |                                                                                                                                                                                                                                                                          | -                                                                                                                                                                                                                                                                                | -                              | -                            | P_trifoliata_00306_mRNA_9.1     |
| GF004723 | 0                           | 0                         | 1                            | Hypothetical protein (1)                                         |                                                                                                                                                                                                                                                                          | -                                                                                                                                                                                                                                                                                | -                              | -                            | P_trifoliata_00306_mRNA_8.1     |
| GF004722 | 0                           | 0                         | 1                            | Hypothetical protein (1)                                         |                                                                                                                                                                                                                                                                          | -                                                                                                                                                                                                                                                                                | -                              | -                            | P_trifoliata_00306_mRNA_7.1     |
| GF004721 | 0                           | 0                         | 1                            | Hypothetical protein (1)                                         |                                                                                                                                                                                                                                                                          | -                                                                                                                                                                                                                                                                                | -                              | -                            | P_trifoliata_00306_mRNA_6.1     |
| GF004720 | 0                           | 0                         | 1                            | Hypothetical protein (1)                                         |                                                                                                                                                                                                                                                                          | -                                                                                                                                                                                                                                                                                | -                              | -                            | P_trifoliata_00306_mRNA_5.1     |
| GF004719 | 0                           | 0                         | 1                            | Hypothetical protein (1)                                         |                                                                                                                                                                                                                                                                          | Aspartic peptidase domain [IPR021109] (1)                                                                                                                                                                                                                                        | -                              | -                            | P_trifoliata_00306_mRNA_4.1     |
| GF004718 | 0                           | 0                         | 1                            | Hypothetical protein (1)                                         |                                                                                                                                                                                                                                                                          | -                                                                                                                                                                                                                                                                                | -                              | -                            | P_trifoliata_00306_mRNA_33.1    |
| GF004717 | 0                           | 0                         | 1                            | ADP-ribosylation factor A1F (1)                                  | small GTPase mediated signal transduction [GO:0007264 biological_process] (1); intracellular [GO:0005622 cellular_component] (1); GTP binding [GO:0005525 molecular_function] (1)                                                                                        | Small GTP-binding protein domain [IPR005225] (1); P-loop containing nucleoside triphosphate hydrolase [IPR027471] (1); Small GTPase superfamily, ARF type [IPR024156] (1); Small GTPase superfamily, ARF/SAR type [IPR006689] (1)                                                | -                              | -                            | P_trifoliata_00306_mRNA_30.1    |
| GF004716 | 0                           | 0                         | 1                            | Hypothetical protein (1)                                         | zinc ion binding [GO:000270 molecular_function] (1); nucleic acid binding [GO:0003676 molecular_function] (1)                                                                                                                                                            | Zinc finger, CCHC-type [IPR001878] (1)                                                                                                                                                                                                                                           | -                              | -                            | P_trifoliata_00306_mRNA_3.1     |
| GF004715 | 0                           | 0                         | 1                            | Hypothetical protein (1)                                         |                                                                                                                                                                                                                                                                          | Leucine-rich repeat domain, L domain-like [IPR032675] (1)                                                                                                                                                                                                                        | -                              | -                            | P_trifoliata_00306_mRNA_20.1    |
| GF004714 | 0                           | 0                         | 1                            | Hypothetical protein (1)                                         |                                                                                                                                                                                                                                                                          | -                                                                                                                                                                                                                                                                                | -                              | -                            | P_trifoliata_00306_mRNA_14.1    |
| GF004713 | 0                           | 0                         | 1                            | Monosaccharide transport protein (1)                             |                                                                                                                                                                                                                                                                          | -                                                                                                                                                                                                                                                                                | -                              | -                            | P_trifoliata_00306_mRNA_12.1    |
| GF004712 | 0                           | 0                         | 1                            | Hypothetical protein (1)                                         |                                                                                                                                                                                                                                                                          | -                                                                                                                                                                                                                                                                                | -                              | -                            | P_trifoliata_00305_mRNA_8.1     |
| GF004711 | 0                           | 0                         | 1                            | Disease resistance protein (CC-NBS-LRR class) family protein (1) | ADP binding [GO:0043531 molecular_function] (1)                                                                                                                                                                                                                          | NB-ARC [IPR002182] (1); P-loop containing nucleoside triphosphate hydrolase [IPR027471] (1); Leucine-rich repeat domain, L domain-like [IPR032675] (1)                                                                                                                           | -                              | -                            | P_trifoliata_00305_mRNA_7.1     |
| GF004710 | 0                           | 0                         | 1                            | Hypothetical protein (1)                                         | aspartic-type endopeptidase activity [GO:0004190 molecular_function] (1); proteolysis [GO:0006508 biological_process] (1)                                                                                                                                                | Aspartic peptidase domain [IPR021109] (1); Aspartic peptidase, active site [IPR001969] (1)                                                                                                                                                                                       | -                              | -                            | P_trifoliata_00305_mRNA_6.1     |
| GF004709 | 0                           | 0                         | 1                            | NBS-LRR type disease resistance protein (1)                      |                                                                                                                                                                                                                                                                          | -                                                                                                                                                                                                                                                                                | -                              | -                            | P_trifoliata_00305_mRNA_3.1     |
| GF004708 | 0                           | 0                         | 1                            | Hypothetical protein (1)                                         |                                                                                                                                                                                                                                                                          | -                                                                                                                                                                                                                                                                                | -                              | -                            | P_trifoliata_00305_mRNA_24.1    |
| GF004707 | 0                           | 0                         | 1                            | Hypothetical protein (1)                                         | strigolactone synthase activity [GO:0016844 molecular_function] (1); biosynthetic process [GO:0009038 biological_process] (1)                                                                                                                                            | Six-bladed beta-propeller, Toll-like [IPR011042] (1); Strigolactone synthase, conserved region [IPR018119] (1); Strigolactone synthase [IPR004411] (1)                                                                                                                           | -                              | -                            | P_trifoliata_00305_mRNA_22.1    |
| GF004706 | 0                           | 0                         | 1                            | Hypothetical protein (1)                                         |                                                                                                                                                                                                                                                                          | Domain of unknown function DUF4283 [IPR025558] (1)                                                                                                                                                                                                                               | -                              | -                            | P_trifoliata_00305_mRNA_2.1     |
| GF004705 | 0                           | 0                         | 1                            | Hypothetical protein (1)                                         |                                                                                                                                                                                                                                                                          | -                                                                                                                                                                                                                                                                                | -                              | -                            | P_trifoliata_00305_mRNA_19.1    |
| GF004704 | 0                           | 0                         | 1                            | Hypothetical protein (1)                                         | biosynthetic process [GO:0009038 biological_process] (1); strigolactone synthase activity [GO:0016844 molecular_function] (1)                                                                                                                                            | Six-bladed beta-propeller, Toll-like [IPR011042] (1); Strigolactone synthase [IPR004411] (1)                                                                                                                                                                                     | -                              | -                            | P_trifoliata_00305_mRNA_16.1    |
| GF004703 | 0                           | 0                         | 1                            | Cytokinin riboside 5'-monophosphate phosphoribohydrolase (1)     |                                                                                                                                                                                                                                                                          | -                                                                                                                                                                                                                                                                                | -                              | -                            | P_trifoliata_00305_mRNA_14.1    |

| ID       | Num. in <i>C. clementiae</i> | Num. in <i>C. anthracis</i> | Num. in <i>P. trifoliarum</i> | Note                                          | GO                                                                                                                                                                                                                                                                                                                                                                                                          | InterPro                                                                                                                                                                                                                      | Members in <i>C. clementiae</i> | Members in <i>C. anthracis</i> | Members in <i>P. trifoliarum</i> |
|----------|------------------------------|-----------------------------|-------------------------------|-----------------------------------------------|-------------------------------------------------------------------------------------------------------------------------------------------------------------------------------------------------------------------------------------------------------------------------------------------------------------------------------------------------------------------------------------------------------------|-------------------------------------------------------------------------------------------------------------------------------------------------------------------------------------------------------------------------------|---------------------------------|--------------------------------|----------------------------------|
| GF004702 | 0                            | 0                           | 0                             | 1 Hypothetical protein (1)                    |                                                                                                                                                                                                                                                                                                                                                                                                             |                                                                                                                                                                                                                               |                                 |                                | P_trifoliata_00305_mRNA_12,1     |
| GF004701 | 0                            | 0                           | 0                             | 1 Hypothetical protein (1)                    |                                                                                                                                                                                                                                                                                                                                                                                                             |                                                                                                                                                                                                                               |                                 |                                | P_trifoliata_00305_mRNA_1,1      |
| GF004700 | 0                            | 0                           | 0                             | 1 Hypothetical protein (1)                    | DNA replication [GO:0006240 biological_process] (1); nucleus [GO:0005634 cellular_component] (1); origin recognition complex [GO:0000808 cellular_component] (1)                                                                                                                                                                                                                                            | Origin recognition complex, subunit 5 [IPRO20796] (1)                                                                                                                                                                         |                                 |                                | P_trifoliata_00304_mRNA_7,1      |
| GF004699 | 0                            | 0                           | 0                             | 1 Hypothetical protein (1)                    | nucleic acid binding [GO:0003676 molecular_function] (1)                                                                                                                                                                                                                                                                                                                                                    | Ribonuclease H-like domain [IPRO12337] (1)                                                                                                                                                                                    |                                 |                                | P_trifoliata_00304_mRNA_3,1      |
| GF004698 | 0                            | 0                           | 0                             | 1 Hypothetical protein (1)                    |                                                                                                                                                                                                                                                                                                                                                                                                             |                                                                                                                                                                                                                               |                                 |                                | P_trifoliata_00304_mRNA_20,1     |
| GF004697 | 0                            | 0                           | 0                             | 1 Hypothetical protein (1)                    |                                                                                                                                                                                                                                                                                                                                                                                                             |                                                                                                                                                                                                                               |                                 |                                | P_trifoliata_00304_mRNA_18,1     |
| GF004696 | 0                            | 0                           | 0                             | 1 Hypothetical protein (1)                    |                                                                                                                                                                                                                                                                                                                                                                                                             |                                                                                                                                                                                                                               |                                 |                                | P_trifoliata_00304_mRNA_14,1     |
| GF004695 | 0                            | 0                           | 0                             | 1 Hypothetical protein (1)                    |                                                                                                                                                                                                                                                                                                                                                                                                             |                                                                                                                                                                                                                               |                                 |                                | P_trifoliata_00304_mRNA_13,1     |
| GF004694 | 0                            | 0                           | 0                             | 1 Hypothetical protein (1)                    |                                                                                                                                                                                                                                                                                                                                                                                                             |                                                                                                                                                                                                                               |                                 |                                | P_trifoliata_00304_mRNA_1,1      |
| GF004693 | 0                            | 0                           | 0                             | 1 Hypothetical protein (1)                    | nucleic acid binding [GO:0003676 molecular_function] (1)                                                                                                                                                                                                                                                                                                                                                    | Ribonuclease H-like domain [IPRO12337] (1)                                                                                                                                                                                    |                                 |                                | P_trifoliata_00303_mRNA_7,1      |
| GF004692 | 0                            | 0                           | 0                             | 1 Hypothetical protein (1)                    |                                                                                                                                                                                                                                                                                                                                                                                                             |                                                                                                                                                                                                                               |                                 |                                | P_trifoliata_00303_mRNA_31,1     |
| GF004691 | 0                            | 0                           | 0                             | 1 Hypothetical protein (1)                    |                                                                                                                                                                                                                                                                                                                                                                                                             |                                                                                                                                                                                                                               |                                 |                                | P_trifoliata_00303_mRNA_28,1     |
| GF004690 | 0                            | 0                           | 0                             | 1 Hypothetical protein (1)                    |                                                                                                                                                                                                                                                                                                                                                                                                             |                                                                                                                                                                                                                               |                                 |                                | P_trifoliata_00303_mRNA_27,1     |
| GF004689 | 0                            | 0                           | 0                             | 1 Hypothetical protein (1)                    |                                                                                                                                                                                                                                                                                                                                                                                                             |                                                                                                                                                                                                                               |                                 |                                | P_trifoliata_00303_mRNA_26,1     |
| GF004688 | 0                            | 0                           | 0                             | 1 Hypothetical protein (1)                    |                                                                                                                                                                                                                                                                                                                                                                                                             |                                                                                                                                                                                                                               |                                 |                                | P_trifoliata_00303_mRNA_25,1     |
| GF004687 | 0                            | 0                           | 0                             | 1 Hypothetical protein (1)                    |                                                                                                                                                                                                                                                                                                                                                                                                             |                                                                                                                                                                                                                               |                                 |                                | P_trifoliata_00303_mRNA_24,1     |
| GF004686 | 0                            | 0                           | 0                             | 1 Hypothetical protein (1)                    | nucleic acid binding [GO:0003676 molecular_function] (1)                                                                                                                                                                                                                                                                                                                                                    | Reverse transcriptase zinc-binding domain [IPRO26960] (1); Ribonuclease H-like domain [IPRO12337] (1)                                                                                                                         |                                 |                                | P_trifoliata_00303_mRNA_21,1     |
| GF004685 | 0                            | 0                           | 0                             | 1 Hypothetical protein (1)                    |                                                                                                                                                                                                                                                                                                                                                                                                             | Transposase, MuDR, plasm [IPRO04332] (1)                                                                                                                                                                                      |                                 |                                | P_trifoliata_00303_mRNA_19,1     |
| GF004684 | 0                            | 0                           | 0                             | 1 Hypothetical protein (1)                    |                                                                                                                                                                                                                                                                                                                                                                                                             | LOG family [IPRO31100] (1)                                                                                                                                                                                                    |                                 |                                | P_trifoliata_00303_mRNA_18,1     |
| GF004683 | 0                            | 0                           | 0                             | 1 Hypothetical protein (1)                    |                                                                                                                                                                                                                                                                                                                                                                                                             |                                                                                                                                                                                                                               |                                 |                                | P_trifoliata_00303_mRNA_16,1     |
| GF004682 | 0                            | 0                           | 0                             | 1 Hypothetical protein (1)                    |                                                                                                                                                                                                                                                                                                                                                                                                             |                                                                                                                                                                                                                               |                                 |                                | P_trifoliata_00303_mRNA_15,1     |
| GF004681 | 0                            | 0                           | 0                             | 1 Hypothetical protein (1)                    |                                                                                                                                                                                                                                                                                                                                                                                                             |                                                                                                                                                                                                                               |                                 |                                | P_trifoliata_00303_mRNA_13,1     |
| GF004680 | 0                            | 0                           | 0                             | 1 Hypothetical protein (1)                    |                                                                                                                                                                                                                                                                                                                                                                                                             |                                                                                                                                                                                                                               |                                 |                                | P_trifoliata_00303_mRNA_11,1     |
| GF004679 | 0                            | 0                           | 0                             | 1 Hypothetical protein (1)                    |                                                                                                                                                                                                                                                                                                                                                                                                             |                                                                                                                                                                                                                               |                                 |                                | P_trifoliata_00303_mRNA_1,1      |
| GF004678 | 0                            | 0                           | 0                             | 1 Hypothetical protein (1)                    | lipase activity [GO:0016298 molecular_function] (1); lipid metabolic process [GO:0006629 biological_process] (1)                                                                                                                                                                                                                                                                                            | SGNH hydrolase-type esterase domain [IPRO13830] (1); Lipase, GDSL, active site [IPRO02625] (1)                                                                                                                                |                                 |                                | P_trifoliata_00302_mRNA_27,1     |
| GF004677 | 0                            | 0                           | 0                             | 1 Hypothetical protein (1)                    |                                                                                                                                                                                                                                                                                                                                                                                                             | SGNH hydrolase-type esterase domain [IPRO13830] (1)                                                                                                                                                                           |                                 |                                | P_trifoliata_00302_mRNA_26,1     |
| GF004676 | 0                            | 0                           | 0                             | 1 Hypothetical protein (1)                    |                                                                                                                                                                                                                                                                                                                                                                                                             |                                                                                                                                                                                                                               |                                 |                                | P_trifoliata_00302_mRNA_22,1     |
| GF004675 | 0                            | 0                           | 0                             | 1 Hypothetical protein (1)                    |                                                                                                                                                                                                                                                                                                                                                                                                             |                                                                                                                                                                                                                               |                                 |                                | P_trifoliata_00302_mRNA_16,1     |
| GF004674 | 0                            | 0                           | 0                             | 1 Hypothetical protein (1)                    |                                                                                                                                                                                                                                                                                                                                                                                                             |                                                                                                                                                                                                                               |                                 |                                | P_trifoliata_00302_mRNA_1,1      |
| GF004673 | 0                            | 0                           | 0                             | 1 Hypothetical protein (1)                    |                                                                                                                                                                                                                                                                                                                                                                                                             |                                                                                                                                                                                                                               |                                 |                                | P_trifoliata_00301_mRNA_31,1     |
| GF004672 | 0                            | 0                           | 0                             | 1 Hypothetical protein (1)                    |                                                                                                                                                                                                                                                                                                                                                                                                             |                                                                                                                                                                                                                               |                                 |                                | P_trifoliata_00301_mRNA_26,1     |
| GF004671 | 0                            | 0                           | 0                             | 1 Hypothetical protein (1)                    |                                                                                                                                                                                                                                                                                                                                                                                                             | NAD(P)-binding domain [IPRO16040] (1); Gamma-secretase aspartyl protease complex, presenilin enhancer-2 subunit [IPRO19379] (1)                                                                                               |                                 |                                | P_trifoliata_00301_mRNA_21,1     |
| GF004670 | 0                            | 0                           | 0                             | 1 Hypothetical protein (1)                    |                                                                                                                                                                                                                                                                                                                                                                                                             | Peritaxosome membrane protein, Pex16 [IPRO13919] (1)                                                                                                                                                                          |                                 |                                | P_trifoliata_00301_mRNA_2,1      |
| GF004669 | 0                            | 0                           | 0                             | 1 Hypothetical protein (1)                    |                                                                                                                                                                                                                                                                                                                                                                                                             |                                                                                                                                                                                                                               |                                 |                                | P_trifoliata_00301_mRNA_19,1     |
| GF004668 | 0                            | 0                           | 0                             | 1 Putative RNA-directed DNA polymerase (1)    |                                                                                                                                                                                                                                                                                                                                                                                                             | Reverse transcriptase zinc-binding domain [IPRO26960] (1)                                                                                                                                                                     |                                 |                                | P_trifoliata_00301_mRNA_15,1     |
| GF004667 | 0                            | 0                           | 0                             | 1 Hypothetical protein (1)                    |                                                                                                                                                                                                                                                                                                                                                                                                             |                                                                                                                                                                                                                               |                                 |                                | P_trifoliata_00300_mRNA_8,1      |
| GF004666 | 0                            | 0                           | 0                             | 1 Hypothetical protein (1)                    |                                                                                                                                                                                                                                                                                                                                                                                                             |                                                                                                                                                                                                                               |                                 |                                | P_trifoliata_00300_mRNA_7,1      |
| GF004665 | 0                            | 0                           | 0                             | 1 Hypothetical protein (1)                    |                                                                                                                                                                                                                                                                                                                                                                                                             |                                                                                                                                                                                                                               |                                 |                                | P_trifoliata_00300_mRNA_6,1      |
| GF004664 | 0                            | 0                           | 0                             | 1 Hypothetical protein (1)                    | polysaccharide binding [GO:0010247 molecular_function] (1)                                                                                                                                                                                                                                                                                                                                                  | Wall-associated receptor kinase, galacturonan-binding domain [IPRO25287] (1)                                                                                                                                                  |                                 |                                | P_trifoliata_00300_mRNA_4,1      |
| GF004663 | 0                            | 0                           | 0                             | 1 Hypothetical protein (1)                    | ATP binding [GO:0005524 molecular_function] (1); polysaccharide binding [GO:0030247 molecular_function] (1); protein phosphorylation [GO:0006468 biological_process] (1); protein kinase activity [GO:0004672 molecular_function] (1)                                                                                                                                                                       | Serine/threonine-protein kinase, active site [IPRO08271] (1); Protein kinase domain [IPRO09719] (1); Protein kinase-like domain [IPRO11009] (1); Wall-associated receptor kinase, galacturonan-binding domain [IPRO25287] (1) |                                 |                                | P_trifoliata_00300_mRNA_3,1      |
| GF004662 | 0                            | 0                           | 0                             | 1 Hypothetical protein (1)                    | protein binding [GO:0005515 molecular_function] (1)                                                                                                                                                                                                                                                                                                                                                         | Tetratricopeptide-like helical domain [IPRO11990] (1)                                                                                                                                                                         |                                 |                                | P_trifoliata_00300_mRNA_26,1     |
| GF004661 | 0                            | 0                           | 0                             | 1 Hypothetical protein (1)                    |                                                                                                                                                                                                                                                                                                                                                                                                             |                                                                                                                                                                                                                               |                                 |                                | P_trifoliata_00300_mRNA_25,1     |
| GF004660 | 0                            | 0                           | 0                             | 1 Hypothetical protein (1)                    |                                                                                                                                                                                                                                                                                                                                                                                                             |                                                                                                                                                                                                                               |                                 |                                | P_trifoliata_00300_mRNA_2,1      |
| GF004659 | 0                            | 0                           | 0                             | 1 Hypothetical protein (1)                    |                                                                                                                                                                                                                                                                                                                                                                                                             | Domain of unknown function DUF4283 [IPRO25558] (1); GDP-fucose protein O-fucosyltransferase [IPRO19378] (1)                                                                                                                   |                                 |                                | P_trifoliata_00299_mRNA_9,1      |
| GF004658 | 0                            | 0                           | 0                             | 1 Hypothetical protein (1)                    |                                                                                                                                                                                                                                                                                                                                                                                                             |                                                                                                                                                                                                                               |                                 |                                | P_trifoliata_00299_mRNA_45,1     |
| GF004657 | 0                            | 0                           | 0                             | 1 Hypothetical protein (1)                    |                                                                                                                                                                                                                                                                                                                                                                                                             |                                                                                                                                                                                                                               |                                 |                                | P_trifoliata_00299_mRNA_41,1     |
| GF004656 | 0                            | 0                           | 0                             | 1 Hypothetical protein (1)                    |                                                                                                                                                                                                                                                                                                                                                                                                             | Ubiquitin-conjugating enzyme:RWD-like [IPRO16135] (1); Ubiquitin-conjugating enzyme, active site [IPRO23313] (1); Ubiquitin-conjugating enzyme E2 [IPRO06068] (1)                                                             |                                 |                                | P_trifoliata_00299_mRNA_40,1     |
| GF004655 | 0                            | 0                           | 0                             | 1 Hypothetical protein (1)                    |                                                                                                                                                                                                                                                                                                                                                                                                             |                                                                                                                                                                                                                               |                                 |                                | P_trifoliata_00299_mRNA_38,1     |
| GF004654 | 0                            | 0                           | 0                             | 1 Hypothetical protein (1)                    |                                                                                                                                                                                                                                                                                                                                                                                                             |                                                                                                                                                                                                                               |                                 |                                | P_trifoliata_00299_mRNA_33,1     |
| GF004653 | 0                            | 0                           | 0                             | 1 Hypothetical protein (1)                    |                                                                                                                                                                                                                                                                                                                                                                                                             |                                                                                                                                                                                                                               |                                 |                                | P_trifoliata_00299_mRNA_30,1     |
| GF004652 | 0                            | 0                           | 0                             | 1 Hypothetical protein (1)                    |                                                                                                                                                                                                                                                                                                                                                                                                             | Thaumatin [IPRO01938] (1)                                                                                                                                                                                                     |                                 |                                | P_trifoliata_00299_mRNA_3,1      |
| GF004651 | 0                            | 0                           | 0                             | 1 Hypothetical protein (1)                    |                                                                                                                                                                                                                                                                                                                                                                                                             |                                                                                                                                                                                                                               |                                 |                                | P_trifoliata_00299_mRNA_28,1     |
| GF004650 | 0                            | 0                           | 0                             | 1 Hypothetical protein (1)                    |                                                                                                                                                                                                                                                                                                                                                                                                             |                                                                                                                                                                                                                               |                                 |                                | P_trifoliata_00299_mRNA_26,1     |
| GF004649 | 0                            | 0                           | 0                             | 1 Hypothetical protein (1)                    |                                                                                                                                                                                                                                                                                                                                                                                                             |                                                                                                                                                                                                                               |                                 |                                | P_trifoliata_00299_mRNA_25,1     |
| GF004648 | 0                            | 0                           | 0                             | 1 Hypothetical protein (1)                    |                                                                                                                                                                                                                                                                                                                                                                                                             |                                                                                                                                                                                                                               |                                 |                                | P_trifoliata_00299_mRNA_24,1     |
| GF004647 | 0                            | 0                           | 0                             | 1 Hypothetical protein (1)                    |                                                                                                                                                                                                                                                                                                                                                                                                             |                                                                                                                                                                                                                               |                                 |                                | P_trifoliata_00299_mRNA_22,1     |
| GF004646 | 0                            | 0                           | 0                             | 1 Hypothetical protein (1)                    |                                                                                                                                                                                                                                                                                                                                                                                                             |                                                                                                                                                                                                                               |                                 |                                | P_trifoliata_00299_mRNA_2,1      |
| GF004645 | 0                            | 0                           | 0                             | 1 Hypothetical protein (1)                    |                                                                                                                                                                                                                                                                                                                                                                                                             |                                                                                                                                                                                                                               |                                 |                                | P_trifoliata_00299_mRNA_19,1     |
| GF004644 | 0                            | 0                           | 0                             | 1 Hypothetical protein (1)                    |                                                                                                                                                                                                                                                                                                                                                                                                             | Receptor, ligand binding region [IPRO01828] (1); Periplasmic binding protein-like 1 [IPRO28082] (1)                                                                                                                           |                                 |                                | P_trifoliata_00299_mRNA_18,1     |
| GF004643 | 0                            | 0                           | 0                             | 1 Hypothetical protein (1)                    |                                                                                                                                                                                                                                                                                                                                                                                                             |                                                                                                                                                                                                                               |                                 |                                | P_trifoliata_00299_mRNA_17,1     |
| GF004642 | 0                            | 0                           | 0                             | 1 Hypothetical protein (1)                    |                                                                                                                                                                                                                                                                                                                                                                                                             |                                                                                                                                                                                                                               |                                 |                                | P_trifoliata_00299_mRNA_14,1     |
| GF004641 | 0                            | 0                           | 0                             | 1 Hypothetical protein (1)                    |                                                                                                                                                                                                                                                                                                                                                                                                             | Endonuclease/exonuclease/phosphatase [IPRO05135] (1)                                                                                                                                                                          |                                 |                                | P_trifoliata_00299_mRNA_13,1     |
| GF004640 | 0                            | 0                           | 0                             | 1 Hypothetical protein (1)                    |                                                                                                                                                                                                                                                                                                                                                                                                             |                                                                                                                                                                                                                               |                                 |                                | P_trifoliata_00299_mRNA_10,1     |
| GF004639 | 0                            | 0                           | 0                             | 1 Hypothetical protein (1)                    |                                                                                                                                                                                                                                                                                                                                                                                                             |                                                                                                                                                                                                                               |                                 |                                | P_trifoliata_00298_mRNA_32,1     |
| GF004638 | 0                            | 0                           | 0                             | 1 Hypothetical protein (1)                    | proteolysis [GO:0006508 biological_process] (1); aspartic-type endopeptidase activity [GO:0004190 molecular_function] (1)                                                                                                                                                                                                                                                                                   | Retropepsins [IPRO18061] (1); Peptidase A2A, retrovirus, catalytic [IPRO01995] (1)                                                                                                                                            |                                 |                                | P_trifoliata_00298_mRNA_31,1     |
| GF004637 | 0                            | 0                           | 0                             | 1 Hypothetical protein (1)                    |                                                                                                                                                                                                                                                                                                                                                                                                             |                                                                                                                                                                                                                               |                                 |                                | P_trifoliata_00298_mRNA_30,1     |
| GF004636 | 0                            | 0                           | 0                             | 1 Hypothetical protein (1)                    |                                                                                                                                                                                                                                                                                                                                                                                                             |                                                                                                                                                                                                                               |                                 |                                | P_trifoliata_00298_mRNA_18,1     |
| GF004635 | 0                            | 0                           | 0                             | 1 Hypothetical protein (1)                    |                                                                                                                                                                                                                                                                                                                                                                                                             |                                                                                                                                                                                                                               |                                 |                                | P_trifoliata_00298_mRNA_17,1     |
| GF004634 | 0                            | 0                           | 0                             | 1 Hypothetical protein (1)                    |                                                                                                                                                                                                                                                                                                                                                                                                             | Leucine-rich repeat domain, L domain-like [IPRO32675] (1); FBD domain [IPRO06566] (1)                                                                                                                                         |                                 |                                | P_trifoliata_00298_mRNA_16,1     |
| GF004633 | 0                            | 0                           | 0                             | 1 Hypothetical protein (1)                    |                                                                                                                                                                                                                                                                                                                                                                                                             |                                                                                                                                                                                                                               |                                 |                                | P_trifoliata_00297_mRNA_8,1      |
| GF004632 | 0                            | 0                           | 0                             | 1 Hypothetical protein (1)                    |                                                                                                                                                                                                                                                                                                                                                                                                             |                                                                                                                                                                                                                               |                                 |                                | P_trifoliata_00297_mRNA_7,1      |
| GF004631 | 0                            | 0                           | 0                             | 1 Hypothetical protein (1)                    | protein dimerization activity [GO:0046983 molecular_function] (1); nucleic acid binding [GO:0003676 molecular_function] (1); DNA binding [GO:0003677 molecular_function] (1); nucleus [GO:0005634 cellular_component] (1); regulation of transcription, DNA-templated [GO:0006355 biological_process] (1); transcription factor activity, sequence-specific DNA binding [GO:0005700 molecular_function] (1) | Transcription factor, K-box [IPRO02487] (1); Ribonuclease H-like domain [IPRO12337] (1); Transcription factor, MADS-box [IPRO02100] (1)                                                                                       |                                 |                                | P_trifoliata_00297_mRNA_33,1     |
| GF004630 | 0                            | 0                           | 0                             | 1 Hypothetical protein (1)                    | lipid metabolic process [GO:0006629 biological_process] (1); phosphoric diester hydrolase activity [GO:0008081 molecular_function] (1)                                                                                                                                                                                                                                                                      | PLC-like phosphodiesterase, TIM beta/alpha-helical domain [IPRO17946] (1)                                                                                                                                                     |                                 |                                | P_trifoliata_00297_mRNA_25,1     |
| GF004629 | 0                            | 0                           | 0                             | 1 Disease resistance response protein 206 (1) |                                                                                                                                                                                                                                                                                                                                                                                                             | Plant disease resistance response protein [IPRO04265] (1)                                                                                                                                                                     |                                 |                                | P_trifoliata_00296_mRNA_6,1      |
| GF004628 | 0                            | 0                           | 0                             | 1 Hypothetical protein (1)                    |                                                                                                                                                                                                                                                                                                                                                                                                             |                                                                                                                                                                                                                               |                                 |                                | P_trifoliata_00296_mRNA_51,1     |
| GF004627 | 0                            | 0                           | 0                             | 1 Hypothetical protein (1)                    |                                                                                                                                                                                                                                                                                                                                                                                                             |                                                                                                                                                                                                                               |                                 |                                | P_trifoliata_00296_mRNA_48,1     |
| GF004626 | 0                            | 0                           | 0                             | 1 Hypothetical protein (1)                    |                                                                                                                                                                                                                                                                                                                                                                                                             |                                                                                                                                                                                                                               |                                 |                                | P_trifoliata_00296_mRNA_44,1     |
| GF004625 | 0                            | 0                           | 0                             | 1 Hypothetical protein (1)                    |                                                                                                                                                                                                                                                                                                                                                                                                             |                                                                                                                                                                                                                               |                                 |                                | P_trifoliata_00296_mRNA_43,1     |
| GF004624 | 0                            | 0                           | 0                             | 1 Hypothetical protein (1)                    |                                                                                                                                                                                                                                                                                                                                                                                                             |                                                                                                                                                                                                                               |                                 |                                | P_trifoliata_00296_mRNA_42,1     |
| GF004623 | 0                            | 0                           | 0                             | 1 Hypothetical protein (1)                    |                                                                                                                                                                                                                                                                                                                                                                                                             |                                                                                                                                                                                                                               |                                 |                                | P_trifoliata_00296_mRNA_40,1     |
| GF004622 | 0                            | 0                           | 0                             | 1 Hypothetical protein (1)                    |                                                                                                                                                                                                                                                                                                                                                                                                             |                                                                                                                                                                                                                               |                                 |                                | P_trifoliata_00296_mRNA_39,1     |
| GF004621 | 0                            | 0                           | 0                             | 1 Hypothetical protein (1)                    |                                                                                                                                                                                                                                                                                                                                                                                                             |                                                                                                                                                                                                                               |                                 |                                | P_trifoliata_00296_mRNA_38,1     |
| GF004620 | 0                            | 0                           | 0                             | 1 Hypothetical protein (1)                    |                                                                                                                                                                                                                                                                                                                                                                                                             |                                                                                                                                                                                                                               |                                 |                                | P_trifoliata_00296_mRNA_37,1     |

| ID        | Num. in <i>C. clementiae</i> | Num. in <i>C. canthii</i> | Num. in <i>P. trifoliata</i> | Note                                                              | GO                                                                                                                                                                                                                                                                                                                | InterPro                                                                                                                                                                                                                                                         | Members in <i>C. clementiae</i> | Members in <i>C. canthii</i> | Members in <i>P. trifoliata</i> |
|-----------|------------------------------|---------------------------|------------------------------|-------------------------------------------------------------------|-------------------------------------------------------------------------------------------------------------------------------------------------------------------------------------------------------------------------------------------------------------------------------------------------------------------|------------------------------------------------------------------------------------------------------------------------------------------------------------------------------------------------------------------------------------------------------------------|---------------------------------|------------------------------|---------------------------------|
| GF0047619 | 0                            | 0                         | 0                            | 1 Hypothetical protein (1)                                        | iron ion binding [GO:0005506 molecular_function] (1); heme binding [GO:0020037 molecular_function] (1); oxidation-reduction process [GO:005114 biological_process] (1); oxidoreductase activity, acting on paired donors, with incorporation or reduction of molecular oxygen [GO:0016795 molecular_function] (1) | Isoprenoid synthase domain [IPRO08949] (1)                                                                                                                                                                                                                       | -                               | -                            | P_trifoliata_00296_mRNA_33.1    |
| GF0047618 | 0                            | 0                         | 0                            | 1 Cytochrome P450 83B1 (1)                                        | cytochrome P450 [GO:0005488 molecular_function] (1); heme binding [GO:0020037 molecular_function] (1); oxidation-reduction process [GO:005114 biological_process] (1); oxidoreductase activity, acting on paired donors, with incorporation or reduction of molecular oxygen [GO:0016795 molecular_function] (1)  | Cytochrome P450 [IPRO01128] (1); Cytochrome P450, C-class, group 1 [IPRO02401] (1)                                                                                                                                                                               | -                               | -                            | P_trifoliata_00296_mRNA_14.1    |
| GF0047617 | 0                            | 0                         | 0                            | 1 Caffeic acid 3-O-methyltransferase (1)                          | O-methyltransferase activity [GO:0008171 molecular_function] (1); methyltransferase activity [GO:0008168 molecular_function] (1)                                                                                                                                                                                  | O-methyltransferase, family 2 [IPRO01077] (1); O-methyltransferase COMT-type [IPRO16461] (1); S-adenosyl-L-methionine-dependent methyltransferase [IPRO29063] (1)                                                                                                | -                               | -                            | P_trifoliata_00296_mRNA_13.1    |
| GF0047616 | 0                            | 0                         | 0                            | 1 UPF0481 protein (1)                                             | -                                                                                                                                                                                                                                                                                                                 | Protein of unknown function DUF247, plant [IPRO04158] (1)                                                                                                                                                                                                        | -                               | -                            | P_trifoliata_00296_mRNA_1.1     |
| GF0047615 | 0                            | 0                         | 0                            | 1 RNA-directed DNA polymerase (Reverse transcriptase) (1)         | -                                                                                                                                                                                                                                                                                                                 | Reverse transcriptase domain [IPRO04077] (1)                                                                                                                                                                                                                     | -                               | -                            | P_trifoliata_00295_mRNA_8.1     |
| GF0047614 | 0                            | 0                         | 0                            | 1 Hypothetical protein (1)                                        | -                                                                                                                                                                                                                                                                                                                 | -                                                                                                                                                                                                                                                                | -                               | -                            | P_trifoliata_00295_mRNA_30.1    |
| GF0047613 | 0                            | 0                         | 0                            | 1 Hypothetical protein (1)                                        | -                                                                                                                                                                                                                                                                                                                 | -                                                                                                                                                                                                                                                                | -                               | -                            | P_trifoliata_00295_mRNA_26.1    |
| GF0047612 | 0                            | 0                         | 0                            | 1 Hypothetical protein (1)                                        | regulation of transcription, DNA-templated [GO:0006355 biological_process] (1); DNA binding [GO:0003677 molecular_function] (1)                                                                                                                                                                                   | NAC domain [IPRO03441] (1)                                                                                                                                                                                                                                       | -                               | -                            | P_trifoliata_00295_mRNA_25.1    |
| GF0047611 | 0                            | 0                         | 0                            | 1 Hypothetical protein (1)                                        | -                                                                                                                                                                                                                                                                                                                 | -                                                                                                                                                                                                                                                                | -                               | -                            | P_trifoliata_00295_mRNA_24.1    |
| GF0047610 | 0                            | 0                         | 0                            | 1 Putative ribonuclease H protein (1)                             | nucleic acid binding [GO:0003676 molecular_function] (1)                                                                                                                                                                                                                                                          | Reverse transcriptase zinc-binding domain [IPRO29600] (1); Ribonuclease H-like domain [IPRO12337] (1)                                                                                                                                                            | -                               | -                            | P_trifoliata_00295_mRNA_10.1    |
| GF0047609 | 0                            | 0                         | 0                            | 1 Hypothetical protein (1)                                        | nucleic acid binding [GO:0003676 molecular_function] (1); regulation of transcription, DNA-templated [GO:0006355 biological_process] (1)                                                                                                                                                                          | Carlavirus nucleic acid-binding protein [IPRO12337] (1)                                                                                                                                                                                                          | -                               | -                            | P_trifoliata_00294_mRNA_6.1     |
| GF0047608 | 0                            | 0                         | 0                            | 1 Hypothetical protein (1)                                        | nucleic acid binding [GO:0003676 molecular_function] (1)                                                                                                                                                                                                                                                          | Ribonuclease H-like domain [IPRO12337] (1)                                                                                                                                                                                                                       | -                               | -                            | P_trifoliata_00294_mRNA_48.1    |
| GF0047607 | 0                            | 0                         | 0                            | 1 Hypothetical protein (1)                                        | -                                                                                                                                                                                                                                                                                                                 | -                                                                                                                                                                                                                                                                | -                               | -                            | P_trifoliata_00294_mRNA_44.1    |
| GF0047606 | 0                            | 0                         | 0                            | 1 Hypothetical protein (1)                                        | -                                                                                                                                                                                                                                                                                                                 | -                                                                                                                                                                                                                                                                | -                               | -                            | P_trifoliata_00294_mRNA_43.1    |
| GF0047605 | 0                            | 0                         | 0                            | 1 Hypothetical protein (1)                                        | -                                                                                                                                                                                                                                                                                                                 | -                                                                                                                                                                                                                                                                | -                               | -                            | P_trifoliata_00294_mRNA_42.1    |
| GF0047604 | 0                            | 0                         | 0                            | 1 Hypothetical protein (1)                                        | -                                                                                                                                                                                                                                                                                                                 | -                                                                                                                                                                                                                                                                | -                               | -                            | P_trifoliata_00294_mRNA_41.1    |
| GF0047603 | 0                            | 0                         | 0                            | 1 Hypothetical protein (1)                                        | -                                                                                                                                                                                                                                                                                                                 | -                                                                                                                                                                                                                                                                | -                               | -                            | P_trifoliata_00294_mRNA_27.1    |
| GF0047602 | 0                            | 0                         | 0                            | 1 Hypothetical protein (1)                                        | -                                                                                                                                                                                                                                                                                                                 | -                                                                                                                                                                                                                                                                | -                               | -                            | P_trifoliata_00294_mRNA_22.1    |
| GF0047601 | 0                            | 0                         | 0                            | 1 Ethylene receptor homolog (1)                                   | -                                                                                                                                                                                                                                                                                                                 | GAF domain-like [IPRO29016] (1)                                                                                                                                                                                                                                  | -                               | -                            | P_trifoliata_00294_mRNA_13.1    |
| GF0047600 | 0                            | 0                         | 0                            | 1 Argininosuccinate lyase (1)                                     | -                                                                                                                                                                                                                                                                                                                 | Conserved hypothetical protein CHP01589, plant [IPRO06476] (1)                                                                                                                                                                                                   | -                               | -                            | P_trifoliata_00293_mRNA_5.1     |
| GF0047599 | 0                            | 0                         | 0                            | 1 Hypothetical protein (1)                                        | -                                                                                                                                                                                                                                                                                                                 | -                                                                                                                                                                                                                                                                | -                               | -                            | P_trifoliata_00293_mRNA_34.1    |
| GF0047598 | 0                            | 0                         | 0                            | 1 Putative 60S ribosomal protein L14 (1)                          | ribosome [GO:0005840 cellular_component] (1); structural constituent of ribosome [GO:0003735 molecular_function] (1); translation [GO:0006412 biological_process] (1); intracellular [GO:0005622 cellular_component] (1)                                                                                          | Ribosomal protein L2, domain 2 [IPRO14723] (1); Ribosomal protein L14 [IPRO02784] (1); Translation protein SHE3-like domain [IPRO08991] (1)                                                                                                                      | -                               | -                            | P_trifoliata_00293_mRNA_33.1    |
| GF0047597 | 0                            | 0                         | 0                            | 1 Hypothetical protein (1)                                        | -                                                                                                                                                                                                                                                                                                                 | Myb/SANT-like domain [IPRO24752] (1) - Oribacterium [IPRO04942] (1)                                                                                                                                                                                              | -                               | -                            | P_trifoliata_00293_mRNA_32.1    |
| GF0047596 | 0                            | 0                         | 0                            | 1 Hypothetical protein (1)                                        | -                                                                                                                                                                                                                                                                                                                 | -                                                                                                                                                                                                                                                                | -                               | -                            | P_trifoliata_00293_mRNA_26.1    |
| GF0047595 | 0                            | 0                         | 0                            | 1 Hypothetical protein (1)                                        | -                                                                                                                                                                                                                                                                                                                 | -                                                                                                                                                                                                                                                                | -                               | -                            | P_trifoliata_00293_mRNA_24.1    |
| GF0047594 | 0                            | 0                         | 0                            | 1 Hypothetical protein (1)                                        | -                                                                                                                                                                                                                                                                                                                 | -                                                                                                                                                                                                                                                                | -                               | -                            | P_trifoliata_00293_mRNA_23.1    |
| GF0047593 | 0                            | 0                         | 0                            | 1 Hypothetical protein (1)                                        | -                                                                                                                                                                                                                                                                                                                 | -                                                                                                                                                                                                                                                                | -                               | -                            | P_trifoliata_00293_mRNA_12.1    |
| GF0047592 | 0                            | 0                         | 0                            | 1 Hypothetical protein (1)                                        | -                                                                                                                                                                                                                                                                                                                 | -                                                                                                                                                                                                                                                                | -                               | -                            | P_trifoliata_00293_mRNA_1.1     |
| GF0047591 | 0                            | 0                         | 0                            | 1 Hypothetical protein (1)                                        | -                                                                                                                                                                                                                                                                                                                 | -                                                                                                                                                                                                                                                                | -                               | -                            | P_trifoliata_00292_mRNA_8.1     |
| GF0047590 | 0                            | 0                         | 0                            | 1 Hypothetical protein (1)                                        | -                                                                                                                                                                                                                                                                                                                 | -                                                                                                                                                                                                                                                                | -                               | -                            | P_trifoliata_00292_mRNA_7.1     |
| GF0047589 | 0                            | 0                         | 0                            | 1 Hypothetical protein (1)                                        | nucleic acid binding [GO:0003676 molecular_function] (1); ATP binding [GO:0005524 molecular_function] (1)                                                                                                                                                                                                         | DEAD/DEAH box helicase domain [IPRO11545] (1); P-loop containing nucleoside triphosphate hydrolase [IPRO27417] (1)                                                                                                                                               | -                               | -                            | P_trifoliata_00292_mRNA_33.1    |
| GF0047588 | 0                            | 0                         | 0                            | 1 DUF247 domain protein (1)                                       | -                                                                                                                                                                                                                                                                                                                 | Protein of unknown function DUF247, plant [IPRO04158] (1)                                                                                                                                                                                                        | -                               | -                            | P_trifoliata_00292_mRNA_24.1    |
| GF0047587 | 0                            | 0                         | 0                            | 1 Hypothetical protein (1)                                        | -                                                                                                                                                                                                                                                                                                                 | -                                                                                                                                                                                                                                                                | -                               | -                            | P_trifoliata_00292_mRNA_1.1     |
| GF0047586 | 0                            | 0                         | 0                            | 1 Hypothetical protein (1)                                        | -                                                                                                                                                                                                                                                                                                                 | -                                                                                                                                                                                                                                                                | -                               | -                            | P_trifoliata_00291_mRNA_8.1     |
| GF0047585 | 0                            | 0                         | 0                            | 1 Hypothetical protein (1)                                        | -                                                                                                                                                                                                                                                                                                                 | -                                                                                                                                                                                                                                                                | -                               | -                            | P_trifoliata_00291_mRNA_4.1     |
| GF0047584 | 0                            | 0                         | 0                            | 1 Hypothetical protein (1)                                        | -                                                                                                                                                                                                                                                                                                                 | -                                                                                                                                                                                                                                                                | -                               | -                            | P_trifoliata_00291_mRNA_3.1     |
| GF0047583 | 0                            | 0                         | 0                            | 1 Hypothetical protein (1)                                        | -                                                                                                                                                                                                                                                                                                                 | Protein kinase-like domain [IPRO11009] (1)                                                                                                                                                                                                                       | -                               | -                            | P_trifoliata_00291_mRNA_21.1    |
| GF0047582 | 0                            | 0                         | 0                            | 1 Hypothetical protein (1)                                        | -                                                                                                                                                                                                                                                                                                                 | -                                                                                                                                                                                                                                                                | -                               | -                            | P_trifoliata_00291_mRNA_20.1    |
| GF0047581 | 0                            | 0                         | 0                            | 1 MAD5-box transcription factor family protein (1)                | protein dimerization activity [GO:0046983 molecular_function] (1); DNA binding [GO:0003677 molecular_function] (1)                                                                                                                                                                                                | Transcription factor, MAD5-box [IPRO02100] (1)                                                                                                                                                                                                                   | -                               | -                            | P_trifoliata_00291_mRNA_19.1    |
| GF0047580 | 0                            | 0                         | 0                            | 1 Hypothetical protein (1)                                        | -                                                                                                                                                                                                                                                                                                                 | -                                                                                                                                                                                                                                                                | -                               | -                            | P_trifoliata_00291_mRNA_14.1    |
| GF0047579 | 0                            | 0                         | 0                            | 1 Kinase superfamily protein, putative isoform 3 (1)              | protein kinase activity [GO:0004672 molecular_function] (1); protein phosphorylation [GO:0006468 biological_process] (1); ATP binding [GO:0005524 molecular_function] (1)                                                                                                                                         | Protein kinase domain [IPRO00719] (1); Protein kinase-like domain [IPRO11009] (1)                                                                                                                                                                                | -                               | -                            | P_trifoliata_00291_mRNA_13.1    |
| GF0047578 | 0                            | 0                         | 0                            | 1 Hypothetical protein (1)                                        | -                                                                                                                                                                                                                                                                                                                 | -                                                                                                                                                                                                                                                                | -                               | -                            | P_trifoliata_00290_mRNA_7.1     |
| GF0047577 | 0                            | 0                         | 0                            | 1 Progesterone 5-beta-reductase (1)                               | -                                                                                                                                                                                                                                                                                                                 | NAD(P)-binding domain [IPRO16040] (1)                                                                                                                                                                                                                            | -                               | -                            | P_trifoliata_00290_mRNA_6.1     |
| GF0047576 | 0                            | 0                         | 0                            | 1 Hypothetical protein (1)                                        | -                                                                                                                                                                                                                                                                                                                 | -                                                                                                                                                                                                                                                                | -                               | -                            | P_trifoliata_00290_mRNA_5.1     |
| GF0047575 | 0                            | 0                         | 0                            | 1 Receptor like protein 33 (1)                                    | protein binding [GO:0005515 molecular_function] (1)                                                                                                                                                                                                                                                               | Leucine-rich repeat domain, L domain-like [IPRO32675] (1); Leucine-rich repeat - [IPRO01611] (1)                                                                                                                                                                 | -                               | -                            | P_trifoliata_00290_mRNA_31.1    |
| GF0047574 | 0                            | 0                         | 0                            | 1 Hypothetical protein (1)                                        | protein binding [GO:0005515 molecular_function] (1)                                                                                                                                                                                                                                                               | Leucine-rich repeat-containing N-terminal, plant-type [IPRO13210] (1); Leucine-rich repeat [IPRO01611] (1); Leucine-rich repeat, typical subtype [IPRO05911] (1); Leucine-rich repeat domain, L domain-like [IPRO32675] (1)                                      | -                               | -                            | P_trifoliata_00290_mRNA_30.1    |
| GF0047573 | 0                            | 0                         | 0                            | 1 Hypothetical protein (1)                                        | -                                                                                                                                                                                                                                                                                                                 | -                                                                                                                                                                                                                                                                | -                               | -                            | P_trifoliata_00290_mRNA_27.1    |
| GF0047572 | 0                            | 0                         | 0                            | 1 60S ribosomal protein L7a (1)                                   | ribosome biogenesis [GO:0042254 biological_process] (1); intracellular ribonucleoprotein complex [GO:0030529 cellular_component] (1)                                                                                                                                                                              | Ribosomal protein L7Ae/L8/Nhp2 family [IPRO18492] (1); 50S ribosomal protein L30e-like [IPRO29064] (1); Ribosomal protein L7Ae/L30e/S12e/Gad445 [IPRO04038] (1); Ribosomal protein L7A/L8 [IPRO01921] (1); Ribosomal protein L7Ae conserved site [IPRO04037] (1) | -                               | -                            | P_trifoliata_00290_mRNA_24.1    |
| GF0047571 | 0                            | 0                         | 0                            | 1 Hypothetical protein (1)                                        | -                                                                                                                                                                                                                                                                                                                 | -                                                                                                                                                                                                                                                                | -                               | -                            | P_trifoliata_00290_mRNA_23.1    |
| GF0047570 | 0                            | 0                         | 0                            | 1 Hypothetical protein (1)                                        | -                                                                                                                                                                                                                                                                                                                 | -                                                                                                                                                                                                                                                                | -                               | -                            | P_trifoliata_00290_mRNA_20.1    |
| GF0047569 | 0                            | 0                         | 0                            | 1 Hypothetical protein (1)                                        | integral component of membrane [GO:0016021 cellular_component] (1); endoplasmic reticulum [GO:0005783 cellular_component] (1); transferase activity, transferring hexosyl groups [GO:0016758 molecular_function] (1)                                                                                              | Glycosyltransferase, ALG3 [IPRO07873] (1)                                                                                                                                                                                                                        | -                               | -                            | P_trifoliata_00290_mRNA_2.1     |
| GF0047568 | 0                            | 0                         | 0                            | 1 Hypothetical protein (1)                                        | -                                                                                                                                                                                                                                                                                                                 | -                                                                                                                                                                                                                                                                | -                               | -                            | P_trifoliata_00290_mRNA_17.1    |
| GF0047567 | 0                            | 0                         | 0                            | 1 Hypothetical protein (1)                                        | -                                                                                                                                                                                                                                                                                                                 | -                                                                                                                                                                                                                                                                | -                               | -                            | P_trifoliata_00290_mRNA_12.1    |
| GF0047566 | 0                            | 0                         | 0                            | 1 Hypothetical protein (1)                                        | -                                                                                                                                                                                                                                                                                                                 | -                                                                                                                                                                                                                                                                | -                               | -                            | P_trifoliata_00290_mRNA_11.1    |
| GF0047565 | 0                            | 0                         | 0                            | 1 Progesterone 5-beta-reductase (1)                               | -                                                                                                                                                                                                                                                                                                                 | NAD(P)-binding domain [IPRO16040] (1)                                                                                                                                                                                                                            | -                               | -                            | P_trifoliata_00290_mRNA_10.1    |
| GF0047564 | 0                            | 0                         | 0                            | 1 Hypothetical protein (1)                                        | -                                                                                                                                                                                                                                                                                                                 | -                                                                                                                                                                                                                                                                | -                               | -                            | P_trifoliata_00289_mRNA_9.1     |
| GF0047563 | 0                            | 0                         | 0                            | 1 Hypothetical protein (1)                                        | -                                                                                                                                                                                                                                                                                                                 | -                                                                                                                                                                                                                                                                | -                               | -                            | P_trifoliata_00289_mRNA_44.1    |
| GF0047562 | 0                            | 0                         | 0                            | 1 Hypothetical protein (1)                                        | -                                                                                                                                                                                                                                                                                                                 | -                                                                                                                                                                                                                                                                | -                               | -                            | P_trifoliata_00289_mRNA_43.1    |
| GF0047561 | 0                            | 0                         | 0                            | 1 Hypothetical protein (1)                                        | -                                                                                                                                                                                                                                                                                                                 | -                                                                                                                                                                                                                                                                | -                               | -                            | P_trifoliata_00289_mRNA_4.1     |
| GF0047560 | 0                            | 0                         | 0                            | 1 Hypothetical protein (1)                                        | -                                                                                                                                                                                                                                                                                                                 | -                                                                                                                                                                                                                                                                | -                               | -                            | P_trifoliata_00289_mRNA_36.1    |
| GF0047559 | 0                            | 0                         | 0                            | 1 Hypothetical protein (1)                                        | -                                                                                                                                                                                                                                                                                                                 | -                                                                                                                                                                                                                                                                | -                               | -                            | P_trifoliata_00289_mRNA_35.1    |
| GF0047558 | 0                            | 0                         | 0                            | 1 Hypothetical protein (1)                                        | -                                                                                                                                                                                                                                                                                                                 | -                                                                                                                                                                                                                                                                | -                               | -                            | P_trifoliata_00289_mRNA_33.1    |
| GF0047557 | 0                            | 0                         | 0                            | 1 Hypothetical protein (1)                                        | -                                                                                                                                                                                                                                                                                                                 | -                                                                                                                                                                                                                                                                | -                               | -                            | P_trifoliata_00289_mRNA_32.1    |
| GF0047556 | 0                            | 0                         | 0                            | 1 Hypothetical protein (1)                                        | -                                                                                                                                                                                                                                                                                                                 | -                                                                                                                                                                                                                                                                | -                               | -                            | P_trifoliata_00289_mRNA_28.1    |
| GF0047555 | 0                            | 0                         | 0                            | 1 Hypothetical protein (1)                                        | -                                                                                                                                                                                                                                                                                                                 | -                                                                                                                                                                                                                                                                | -                               | -                            | P_trifoliata_00289_mRNA_27.1    |
| GF0047554 | 0                            | 0                         | 0                            | 1 Hypothetical protein (1)                                        | -                                                                                                                                                                                                                                                                                                                 | -                                                                                                                                                                                                                                                                | -                               | -                            | P_trifoliata_00289_mRNA_25.1    |
| GF0047553 | 0                            | 0                         | 0                            | 1 Hypothetical protein (1)                                        | -                                                                                                                                                                                                                                                                                                                 | -                                                                                                                                                                                                                                                                | -                               | -                            | P_trifoliata_00289_mRNA_24.1    |
| GF0047552 | 0                            | 0                         | 0                            | 1 Hypothetical protein (1)                                        | -                                                                                                                                                                                                                                                                                                                 | -                                                                                                                                                                                                                                                                | -                               | -                            | P_trifoliata_00289_mRNA_16.1    |
| GF0047551 | 0                            | 0                         | 0                            | 1 Hypothetical protein (1)                                        | -                                                                                                                                                                                                                                                                                                                 | -                                                                                                                                                                                                                                                                | -                               | -                            | P_trifoliata_00289_mRNA_12.1    |
| GF0047550 | 0                            | 0                         | 0                            | 1 Hypothetical protein (1)                                        | -                                                                                                                                                                                                                                                                                                                 | -                                                                                                                                                                                                                                                                | -                               | -                            | P_trifoliata_00289_mRNA_11.1    |
| GF0047549 | 0                            | 0                         | 0                            | 1 Retrovirus-related Pol polyprotein from transposon TN1 1-94 (1) | -                                                                                                                                                                                                                                                                                                                 | -                                                                                                                                                                                                                                                                | -                               | -                            | P_trifoliata_00289_mRNA_1.1     |
| GF0047548 | 0                            | 0                         | 0                            | 1 Hypothetical protein (1)                                        | -                                                                                                                                                                                                                                                                                                                 | -                                                                                                                                                                                                                                                                | -                               | -                            | P_trifoliata_00288_mRNA_9.1     |
| GF0047547 | 0                            | 0                         | 0                            | 1 Hypothetical protein (1)                                        | -                                                                                                                                                                                                                                                                                                                 | -                                                                                                                                                                                                                                                                | -                               | -                            | P_trifoliata_00288_mRNA_7.1     |
| GF0047546 | 0                            | 0                         | 0                            | 1 Hypothetical protein (1)                                        | -                                                                                                                                                                                                                                                                                                                 | -                                                                                                                                                                                                                                                                | -                               | -                            | P_trifoliata_00288_mRNA_6.1     |
| GF0047545 | 0                            | 0                         | 0                            | 1 Hypothetical protein (1)                                        | regulation of transcription, DNA-templated [GO:0006355 biological_process] (1); DNA binding [GO:0003677 molecular_function] (1)                                                                                                                                                                                   | NAC domain [IPRO03441] (1); Transmembrane protein 135 [IPRO26749] (1)                                                                                                                                                                                            | -                               | -                            | P_trifoliata_00288_mRNA_47.1    |

| ID        | Num. in <i>C. celastroides</i> | Num. in <i>C. umbita</i> | Num. in <i>P. trifoliata</i> | Note                                                                | GO                                                                                                                                                                                                            | InterPro                                                                                                                                                              | Members in <i>Celastroides</i> | Members in <i>Umbita</i> | Members in <i>P. trifoliata</i> |
|-----------|--------------------------------|--------------------------|------------------------------|---------------------------------------------------------------------|---------------------------------------------------------------------------------------------------------------------------------------------------------------------------------------------------------------|-----------------------------------------------------------------------------------------------------------------------------------------------------------------------|--------------------------------|--------------------------|---------------------------------|
| GF0047544 | 0                              | 0                        | 1                            | Hypothetical protein (1)                                            | protein binding [GO:0005515 molecular_function] (1)                                                                                                                                                           | Leucine-rich repeat [IPR001611] (1); Leucine-rich repeat domain, L domain-like [IPR032675] (1)                                                                        | -                              | -                        | P_trifoliata_00288_mRNA_45.1    |
| GF0047543 | 0                              | 0                        | 1                            | Hypothetical protein (1)                                            | regulation of transcription, DNA-templated [GO:0006355 biological_process] (1); DNA binding [GO:0005677 molecular_function] (1)                                                                               | NAC domain [IPR003441] (1)                                                                                                                                            | -                              | -                        | P_trifoliata_00288_mRNA_43.1    |
| GF0047542 | 0                              | 0                        | 1                            | Hypothetical protein (1)                                            | potassium ion transmembrane transporter activity [GO:0015079 molecular_function] (1); membrane [GO:0016020 cellular_component] (1); potassium ion transmembrane transport [GO:0071805 biological_process] (1) | Potassium transporter [IPR003855] (1)                                                                                                                                 | -                              | -                        | P_trifoliata_00288_mRNA_41.1    |
| GF0047541 | 0                              | 0                        | 1                            | Hypothetical protein (1)                                            |                                                                                                                                                                                                               |                                                                                                                                                                       | -                              | -                        | P_trifoliata_00288_mRNA_39.1    |
| GF0047540 | 0                              | 0                        | 1                            | Hypothetical protein (1)                                            |                                                                                                                                                                                                               |                                                                                                                                                                       | -                              | -                        | P_trifoliata_00288_mRNA_28.1    |
| GF0047539 | 0                              | 0                        | 1                            | Hypothetical protein (1)                                            |                                                                                                                                                                                                               |                                                                                                                                                                       | -                              | -                        | P_trifoliata_00288_mRNA_22.1    |
| GF0047538 | 0                              | 0                        | 1                            | Hypothetical protein (1)                                            |                                                                                                                                                                                                               |                                                                                                                                                                       | -                              | -                        | P_trifoliata_00288_mRNA_1.1     |
| GF0047537 | 0                              | 0                        | 1                            | Hypothetical protein (1)                                            |                                                                                                                                                                                                               |                                                                                                                                                                       | -                              | -                        | P_trifoliata_00287_mRNA_9.1     |
| GF0047536 | 0                              | 0                        | 1                            | Hypothetical protein (1)                                            |                                                                                                                                                                                                               |                                                                                                                                                                       | -                              | -                        | P_trifoliata_00287_mRNA_7.1     |
| GF0047535 | 0                              | 0                        | 1                            | Nascent polypeptide-associated complex alpha chain-like protein (1) |                                                                                                                                                                                                               | Nascent polypeptide-associated complex NAC domain [IPR002715] (1); Nascent polypeptide-associated complex subunit alpha [IPR016641] (1)                               | -                              | -                        | P_trifoliata_00287_mRNA_4.1     |
| GF0047534 | 0                              | 0                        | 1                            | Hypothetical protein (1)                                            | transmembrane transporter activity [GO:0022857 molecular_function] (1); integral component of membrane [GO:0016021 cellular_component] (1)                                                                    | WAT1-related protein [IPR030184] (1)                                                                                                                                  | -                              | -                        | P_trifoliata_00287_mRNA_24.1    |
| GF0047533 | 0                              | 0                        | 1                            | Hypothetical protein (1)                                            |                                                                                                                                                                                                               |                                                                                                                                                                       | -                              | -                        | P_trifoliata_00287_mRNA_18.1    |
| GF0047532 | 0                              | 0                        | 1                            | Hypothetical protein (1)                                            |                                                                                                                                                                                                               |                                                                                                                                                                       | -                              | -                        | P_trifoliata_00287_mRNA_1.1     |
| GF0047531 | 0                              | 0                        | 1                            | Benzyl alcohol O-benzoyltransferase (1)                             | transferase activity, transferring acyl groups other than amino-acyl groups [GO:0016747 molecular_function] (1)                                                                                               | Transferase [IPR003480] (1); Chloramphenicol acetyltransferase-like domain [IPR023213] (1)                                                                            | -                              | -                        | P_trifoliata_00286_mRNA_9.1     |
| GF0047530 | 0                              | 0                        | 1                            | Hypothetical protein (1)                                            |                                                                                                                                                                                                               | Chloramphenicol acetyltransferase-like domain [IPR023213] (1)                                                                                                         | -                              | -                        | P_trifoliata_00286_mRNA_6.1     |
| GF0047529 | 0                              | 0                        | 1                            | Hypothetical protein (1)                                            |                                                                                                                                                                                                               | Bifunctional inhibitor/plant lipid transfer protein/seed storage helical domain [IPR016440] (1)                                                                       | -                              | -                        | P_trifoliata_00286_mRNA_41.1    |
| GF0047528 | 0                              | 0                        | 1                            | Hypothetical protein (1)                                            | protein binding [GO:0005515 molecular_function] (1)                                                                                                                                                           | Ubiquitin-related domain [IPR029071] (1); Ubiquitin domain [IPR000626] (1)                                                                                            | -                              | -                        | P_trifoliata_00286_mRNA_39.1    |
| GF0047527 | 0                              | 0                        | 1                            | Benzyl alcohol O-benzoyltransferase (1)                             | transferase activity, transferring acyl groups other than amino-acyl groups [GO:0016747 molecular_function] (1)                                                                                               | Transferase [IPR003480] (1); Chloramphenicol acetyltransferase-like domain [IPR023213] (1)                                                                            | -                              | -                        | P_trifoliata_00286_mRNA_23.1    |
| GF0047526 | 0                              | 0                        | 1                            | Benzyl alcohol O-benzoyltransferase (1)                             | transferase activity, transferring acyl groups other than amino-acyl groups [GO:0016747 molecular_function] (1)                                                                                               | Chloramphenicol acetyltransferase-like domain [IPR023213] (1); Transferase [IPR003480] (1)                                                                            | -                              | -                        | P_trifoliata_00286_mRNA_22.1    |
| GF0047525 | 0                              | 0                        | 1                            | Hypothetical protein (1)                                            |                                                                                                                                                                                                               |                                                                                                                                                                       | -                              | -                        | P_trifoliata_00286_mRNA_14.1    |
| GF0047524 | 0                              | 0                        | 1                            | Hypothetical protein (1)                                            |                                                                                                                                                                                                               |                                                                                                                                                                       | -                              | -                        | P_trifoliata_00286_mRNA_10.1    |
| GF0047523 | 0                              | 0                        | 1                            | Epoxide hydrolase (1)                                               | catalytic activity [GO:0003824 molecular_function] (1)                                                                                                                                                        | Epoxide hydrolase-like [IPR000639] (1); Alpha/Beta hydrolase fold [IPR029058] (1); Alpha/beta hydrolase fold-1 [IPR000073] (1)                                        | -                              | -                        | P_trifoliata_00285_mRNA_42.1    |
| GF0047522 | 0                              | 0                        | 1                            | Hypothetical protein (1)                                            | transaminase activity [GO:0008483 molecular_function] (1); catalytic activity [GO:0003824 molecular_function] (1); pyridoxal phosphate binding [GO:0030170 molecular_function] (1)                            | Pyridoxal phosphate-dependent transferase, major region, subdomain 2 [IPR015422] (1); Amino-transferase class-III [IPR005814] (1)                                     | -                              | -                        | P_trifoliata_00285_mRNA_41.1    |
| GF0047521 | 0                              | 0                        | 1                            | Hypothetical protein (1)                                            |                                                                                                                                                                                                               | Domain of unknown function DUF1985 [IPR015410] (1)                                                                                                                    | -                              | -                        | P_trifoliata_00285_mRNA_37.1    |
| GF0047520 | 0                              | 0                        | 1                            | Hypothetical protein (1)                                            |                                                                                                                                                                                                               | Chorismate-utilising enzyme, C-terminal [IPR015890] (1); ADC synthase [IPR015801] (1); Anthranilate synthase component 1-like [IPR019999] (1)                         | -                              | -                        | P_trifoliata_00285_mRNA_25.1    |
| GF0047519 | 0                              | 0                        | 1                            | Hypothetical protein (1)                                            | biosynthetic process [GO:000958 biological_process] (1)                                                                                                                                                       |                                                                                                                                                                       | -                              | -                        | P_trifoliata_00285_mRNA_2.1     |
| GF0047518 | 0                              | 0                        | 1                            | Pentatricopeptide repeat (PPR) superfamily protein, putative (1)    | protein binding [GO:0005515 molecular_function] (1)                                                                                                                                                           | Tetratricopeptide-like helical domain [IPR011990] (1); Pentatricopeptide repeat [IPR002851] (1)                                                                       | -                              | -                        | P_trifoliata_00285_mRNA_11.1    |
| GF0047517 | 0                              | 0                        | 1                            | Hypothetical protein (1)                                            |                                                                                                                                                                                                               |                                                                                                                                                                       | -                              | -                        | P_trifoliata_00284_mRNA_4.1     |
| GF0047516 | 0                              | 0                        | 1                            | Hypothetical protein (1)                                            |                                                                                                                                                                                                               | Domain of unknown function DUF4217 [IPR025131] (1)                                                                                                                    | -                              | -                        | P_trifoliata_00284_mRNA_33.1    |
| GF0047515 | 0                              | 0                        | 1                            | Hypothetical protein (1)                                            |                                                                                                                                                                                                               |                                                                                                                                                                       | -                              | -                        | P_trifoliata_00284_mRNA_32.1    |
| GF0047514 | 0                              | 0                        | 1                            | Hypothetical protein (1)                                            |                                                                                                                                                                                                               |                                                                                                                                                                       | -                              | -                        | P_trifoliata_00284_mRNA_30.1    |
| GF0047513 | 0                              | 0                        | 1                            | Hypothetical protein (1)                                            |                                                                                                                                                                                                               |                                                                                                                                                                       | -                              | -                        | P_trifoliata_00284_mRNA_2.1     |
| GF0047512 | 0                              | 0                        | 1                            | Hypothetical protein (1)                                            |                                                                                                                                                                                                               |                                                                                                                                                                       | -                              | -                        | P_trifoliata_00283_mRNA_8.1     |
| GF0047511 | 0                              | 0                        | 1                            | Hypothetical protein (1)                                            |                                                                                                                                                                                                               |                                                                                                                                                                       | -                              | -                        | P_trifoliata_00283_mRNA_41.1    |
| GF0047510 | 0                              | 0                        | 1                            | Hypothetical protein (1)                                            |                                                                                                                                                                                                               |                                                                                                                                                                       | -                              | -                        | P_trifoliata_00283_mRNA_40.1    |
| GF0047509 | 0                              | 0                        | 1                            | Hypothetical protein (1)                                            |                                                                                                                                                                                                               |                                                                                                                                                                       | -                              | -                        | P_trifoliata_00283_mRNA_4.1     |
| GF0047508 | 0                              | 0                        | 1                            | Hypothetical protein (1)                                            |                                                                                                                                                                                                               |                                                                                                                                                                       | -                              | -                        | P_trifoliata_00283_mRNA_38.1    |
| GF0047507 | 0                              | 0                        | 1                            | Hypothetical protein (1)                                            |                                                                                                                                                                                                               |                                                                                                                                                                       | -                              | -                        | P_trifoliata_00283_mRNA_35.1    |
| GF0047506 | 0                              | 0                        | 1                            | Cytokinin riboside 5' monophosphate phosphoribosyltransferase (1)   |                                                                                                                                                                                                               | LOG family [IPR031100] (1)                                                                                                                                            | -                              | -                        | P_trifoliata_00283_mRNA_33.1    |
| GF0047505 | 0                              | 0                        | 1                            | Hypothetical protein (1)                                            |                                                                                                                                                                                                               |                                                                                                                                                                       | -                              | -                        | P_trifoliata_00283_mRNA_31.1    |
| GF0047504 | 0                              | 0                        | 1                            | Hypothetical protein (1)                                            |                                                                                                                                                                                                               |                                                                                                                                                                       | -                              | -                        | P_trifoliata_00283_mRNA_30.1    |
| GF0047503 | 0                              | 0                        | 1                            | Hypothetical protein (1)                                            |                                                                                                                                                                                                               |                                                                                                                                                                       | -                              | -                        | P_trifoliata_00283_mRNA_28.1    |
| GF0047502 | 0                              | 0                        | 1                            | Hypothetical protein (1)                                            |                                                                                                                                                                                                               |                                                                                                                                                                       | -                              | -                        | P_trifoliata_00283_mRNA_27.1    |
| GF0047501 | 0                              | 0                        | 1                            | Hypothetical protein (1)                                            |                                                                                                                                                                                                               | Double-stranded RNA-binding domain [IPR014720] (1)                                                                                                                    | -                              | -                        | P_trifoliata_00283_mRNA_26.1    |
| GF0047500 | 0                              | 0                        | 1                            | Hypothetical protein (1)                                            |                                                                                                                                                                                                               |                                                                                                                                                                       | -                              | -                        | P_trifoliata_00283_mRNA_22.1    |
| GF0047499 | 0                              | 0                        | 1                            | Hypothetical protein (1)                                            |                                                                                                                                                                                                               |                                                                                                                                                                       | -                              | -                        | P_trifoliata_00283_mRNA_19.1    |
| GF0047498 | 0                              | 0                        | 1                            | Hypothetical protein (1)                                            |                                                                                                                                                                                                               |                                                                                                                                                                       | -                              | -                        | P_trifoliata_00283_mRNA_16.1    |
| GF0047497 | 0                              | 0                        | 1                            | Hypothetical protein (1)                                            |                                                                                                                                                                                                               |                                                                                                                                                                       | -                              | -                        | P_trifoliata_00283_mRNA_15.1    |
| GF0047496 | 0                              | 0                        | 1                            | Hypothetical protein (1)                                            |                                                                                                                                                                                                               | Retransposon gag domain [IPR005162] (1)                                                                                                                               | -                              | -                        | P_trifoliata_00283_mRNA_14.1    |
| GF0047495 | 0                              | 0                        | 1                            | Progesterone 5-beta-reductase (1)                                   |                                                                                                                                                                                                               | NAD(P)-binding domain [IPR016040] (1)                                                                                                                                 | -                              | -                        | P_trifoliata_00283_mRNA_13.1    |
| GF0047494 | 0                              | 0                        | 1                            | Hypothetical protein (1)                                            |                                                                                                                                                                                                               |                                                                                                                                                                       | -                              | -                        | P_trifoliata_00283_mRNA_10.1    |
| GF0047493 | 0                              | 0                        | 1                            | Hypothetical protein (1)                                            |                                                                                                                                                                                                               |                                                                                                                                                                       | -                              | -                        | P_trifoliata_00282_mRNA_6.1     |
| GF0047492 | 0                              | 0                        | 1                            | Hypothetical protein (1)                                            |                                                                                                                                                                                                               |                                                                                                                                                                       | -                              | -                        | P_trifoliata_00282_mRNA_4.1     |
| GF0047491 | 0                              | 0                        | 1                            | Hypothetical protein (1)                                            |                                                                                                                                                                                                               |                                                                                                                                                                       | -                              | -                        | P_trifoliata_00282_mRNA_38.1    |
| GF0047490 | 0                              | 0                        | 1                            | Hypothetical protein (1)                                            |                                                                                                                                                                                                               |                                                                                                                                                                       | -                              | -                        | P_trifoliata_00282_mRNA_3.1     |
| GF0047489 | 0                              | 0                        | 1                            | Hypothetical protein (1)                                            |                                                                                                                                                                                                               |                                                                                                                                                                       | -                              | -                        | P_trifoliata_00282_mRNA_1.1     |
| GF0047488 | 0                              | 0                        | 1                            | Hypothetical protein (1)                                            | nucleic acid binding [GO:0003676 molecular_function] (1); RNA-DNA hybrid ribonuclease activity [GO:0004523 molecular_function] (1)                                                                            | Ribonuclease H domain [IPR002156] (1); Ribonuclease H-like domain [IPR012337] (1)                                                                                     | -                              | -                        | P_trifoliata_00281_mRNA_9.1     |
| GF0047487 | 0                              | 0                        | 1                            | Hypothetical protein (1)                                            |                                                                                                                                                                                                               |                                                                                                                                                                       | -                              | -                        | P_trifoliata_00281_mRNA_7.1     |
| GF0047486 | 0                              | 0                        | 1                            | Hypothetical protein (1)                                            |                                                                                                                                                                                                               |                                                                                                                                                                       | -                              | -                        | P_trifoliata_00281_mRNA_4.1     |
| GF0047485 | 0                              | 0                        | 1                            | Hypothetical protein (1)                                            |                                                                                                                                                                                                               |                                                                                                                                                                       | -                              | -                        | P_trifoliata_00281_mRNA_33.1    |
| GF0047484 | 0                              | 0                        | 1                            | Hypothetical protein (1)                                            |                                                                                                                                                                                                               |                                                                                                                                                                       | -                              | -                        | P_trifoliata_00281_mRNA_31.1    |
| GF0047483 | 0                              | 0                        | 1                            | Hypothetical protein (1)                                            |                                                                                                                                                                                                               |                                                                                                                                                                       | -                              | -                        | P_trifoliata_00281_mRNA_30.1    |
| GF0047482 | 0                              | 0                        | 1                            | Hypothetical protein (1)                                            | ATP binding [GO:0005524 molecular_function] (1); protein kinase activity [GO:0004672 molecular_function] (1); protein phosphorylation [GO:0006468 biological_process] (1)                                     | Serine/threonine/dual specificity protein kinase, catalytic domain [IPR002290] (1); Protein kinase domain [IPR000719] (1); Protein kinase-like domain [IPR011009] (1) | -                              | -                        | P_trifoliata_00281_mRNA_3.1     |
| GF0047481 | 0                              | 0                        | 1                            | Hypothetical protein (1)                                            |                                                                                                                                                                                                               | Chromo domain-like [IPR016197] (1); Chromo domain [IPR023780] (1)                                                                                                     | -                              | -                        | P_trifoliata_00281_mRNA_17.1    |
| GF0047480 | 0                              | 0                        | 1                            | Hypothetical protein (1)                                            |                                                                                                                                                                                                               |                                                                                                                                                                       | -                              | -                        | P_trifoliata_00281_mRNA_14.1    |
| GF0047479 | 0                              | 0                        | 1                            | Hypothetical protein (1)                                            |                                                                                                                                                                                                               |                                                                                                                                                                       | -                              | -                        | P_trifoliata_00281_mRNA_11.1    |
| GF0047478 | 0                              | 0                        | 1                            | Hypothetical protein (1)                                            |                                                                                                                                                                                                               |                                                                                                                                                                       | -                              | -                        | P_trifoliata_00281_mRNA_10.1    |
| GF0047477 | 0                              | 0                        | 1                            | Zinc knuckle family protein (1)                                     |                                                                                                                                                                                                               |                                                                                                                                                                       | -                              | -                        | P_trifoliata_00280_mRNA_9.1     |
| GF0047476 | 0                              | 0                        | 1                            | Hypothetical protein (1)                                            |                                                                                                                                                                                                               |                                                                                                                                                                       | -                              | -                        | P_trifoliata_00280_mRNA_7.1     |
| GF0047475 | 0                              | 0                        | 1                            | Kunitz-type trypsin inhibitor (1)                                   | endopeptidase inhibitor activity [GO:0004866 molecular_function] (1)                                                                                                                                          | Proteinase inhibitor I3, Kunitz legume [IPR002160] (1); Domain of unknown function DUF1985 [IPR015410] (1); Kunitz inhibitor ST1-like [IPR011065] (1)                 | -                              | -                        | P_trifoliata_00280_mRNA_5.1     |
| GF0047474 | 0                              | 0                        | 1                            | Hypothetical protein (1)                                            |                                                                                                                                                                                                               | GHMP kinase, C-terminal domain [IPR013750] (1)                                                                                                                        | -                              | -                        | P_trifoliata_00280_mRNA_43.1    |
| GF0047473 | 0                              | 0                        | 1                            | Hypothetical protein (1)                                            |                                                                                                                                                                                                               |                                                                                                                                                                       | -                              | -                        | P_trifoliata_00280_mRNA_42.1    |
| GF0047472 | 0                              | 0                        | 1                            | Hypothetical protein (1)                                            | nucleic acid binding [GO:0003676 molecular_function] (1)                                                                                                                                                      | Ribonuclease H-like domain [IPR012337] (1)                                                                                                                            | -                              | -                        | P_trifoliata_00280_mRNA_41.1    |
| GF0047471 | 0                              | 0                        | 1                            | Hypothetical protein (1)                                            |                                                                                                                                                                                                               |                                                                                                                                                                       | -                              | -                        | P_trifoliata_00280_mRNA_40.1    |
| GF0047470 | 0                              | 0                        | 1                            | Hypothetical protein (1)                                            |                                                                                                                                                                                                               |                                                                                                                                                                       | -                              | -                        | P_trifoliata_00280_mRNA_4.1     |
| GF0047469 | 0                              | 0                        | 1                            | Hypothetical protein (1)                                            |                                                                                                                                                                                                               |                                                                                                                                                                       | -                              | -                        | P_trifoliata_00280_mRNA_39.1    |
| GF0047468 | 0                              | 0                        | 1                            | Hypothetical protein (1)                                            | nucleic acid binding [GO:0003676 molecular_function] (1); zinc ion binding [GO:0008270 molecular_function] (1)                                                                                                | Zinc finger, CCHC-type [IPR001878] (1)                                                                                                                                | -                              | -                        | P_trifoliata_00280_mRNA_37.1    |
| GF0047467 | 0                              | 0                        | 1                            | Acylsugar acyltransferase 3 (1)                                     | transferase activity, transferring acyl groups other than amino-acyl groups [GO:0016747 molecular_function] (1)                                                                                               | Chloramphenicol acetyltransferase-like domain [IPR023213] (1); Transferase [IPR003480] (1)                                                                            | -                              | -                        | P_trifoliata_00280_mRNA_34.1    |
| GF0047466 | 0                              | 0                        | 1                            | Hypothetical protein (1)                                            | transferase activity, transferring acyl groups other than amino-acyl groups [GO:0016747 molecular_function] (1)                                                                                               | Chloramphenicol acetyltransferase-like domain [IPR023213] (1); Transferase [IPR003480] (1)                                                                            | -                              | -                        | P_trifoliata_00280_mRNA_33.1    |

| ID        | Num. in <i>C. clementiae</i> | Num. in <i>C. canthii</i> | Num. in <i>P. trifoliata</i> | Note                                                              | GO                                                                                                                                                                                                                                  | InterPro                                                                                                                                                                                                                                                                                       | Members in <i>C. clementiae</i> | Members in <i>C. canthii</i> | Members in <i>P. trifoliata</i> |
|-----------|------------------------------|---------------------------|------------------------------|-------------------------------------------------------------------|-------------------------------------------------------------------------------------------------------------------------------------------------------------------------------------------------------------------------------------|------------------------------------------------------------------------------------------------------------------------------------------------------------------------------------------------------------------------------------------------------------------------------------------------|---------------------------------|------------------------------|---------------------------------|
| GF0047465 | 0                            | 0                         | 1                            | Chitinase (1)                                                     | chitin catabolic process [GO:0006032 biological_process] (1); chitinase activity [GO:0004568 molecular_function] (1); cell wall macromolecule catabolic process [GO:0016998 biological_process] (1)                                 | Retrotrombospon spp domain [IPRO0162] (1); Lysozyme-like domain [IPRO23346] (1); Glycoside hydrolase, family 19, catalytic [IPRO00726] (1)                                                                                                                                                     | -                               | -                            | P_trifoliata_00280_mRNA_32.1    |
| GF0047464 | 0                            | 0                         | 1                            | Hypothetical protein (1)                                          | -                                                                                                                                                                                                                                   | -                                                                                                                                                                                                                                                                                              | -                               | -                            | P_trifoliata_00280_mRNA_29.1    |
| GF0047463 | 0                            | 0                         | 1                            | Ribonuclease H protein, putative (1)                              | -                                                                                                                                                                                                                                   | Reverse transcriptase zinc-binding domain [IPRO26960] (1)                                                                                                                                                                                                                                      | -                               | -                            | P_trifoliata_00280_mRNA_22.1    |
| GF0047462 | 0                            | 0                         | 1                            | Chitinase (1)                                                     | chitin catabolic process [GO:0006032 biological_process] (1); chitinase activity [GO:0004568 molecular_function] (1); cell wall macromolecule catabolic process [GO:0016998 biological_process] (1)                                 | Glycoside hydrolase, family 19, catalytic [IPRO00726] (1); Lysozyme-like domain [IPRO23346] (1)                                                                                                                                                                                                | -                               | -                            | P_trifoliata_00280_mRNA_15.1    |
| GF0047461 | 0                            | 0                         | 1                            | Hypothetical protein (1)                                          | -                                                                                                                                                                                                                                   | -                                                                                                                                                                                                                                                                                              | -                               | -                            | P_trifoliata_00280_mRNA_13.1    |
| GF0047460 | 0                            | 0                         | 1                            | MADS-box transcription factor family protein (1)                  | -                                                                                                                                                                                                                                   | -                                                                                                                                                                                                                                                                                              | -                               | -                            | P_trifoliata_00279_mRNA_7.1     |
| GF0047459 | 0                            | 0                         | 1                            | Hypothetical protein (1)                                          | malate transport [GO:0015743 biological_process] (1)                                                                                                                                                                                | Aluminum-activated malate transporter [IPRO20966] (1)                                                                                                                                                                                                                                          | -                               | -                            | P_trifoliata_00279_mRNA_6.1     |
| GF0047458 | 0                            | 0                         | 1                            | Hypothetical protein (1)                                          | -                                                                                                                                                                                                                                   | -                                                                                                                                                                                                                                                                                              | -                               | -                            | P_trifoliata_00279_mRNA_5.1     |
| GF0047457 | 0                            | 0                         | 1                            | Hypothetical protein (1)                                          | serine-type carboxypeptidase activity [GO:0004185 molecular_function] (1); proteolysis [GO:0006508 biological_process] (1)                                                                                                          | Alpha/Beta hydrolase fold [IPRO29058] (1); Peptidase S10, serine carboxypeptidase [IPRO01563] (1)                                                                                                                                                                                              | -                               | -                            | P_trifoliata_00279_mRNA_40.1    |
| GF0047456 | 0                            | 0                         | 1                            | Serine carboxypeptidase-like 7 (1)                                | proteolysis [GO:0006508 biological_process] (1); serine-type carboxypeptidase activity [GO:0004185 molecular_function] (1)                                                                                                          | Peptidase S10, serine carboxypeptidase [IPRO01563] (1); Alpha/Beta hydrolase fold [IPRO29058] (1)                                                                                                                                                                                              | -                               | -                            | P_trifoliata_00279_mRNA_35.1    |
| GF0047455 | 0                            | 0                         | 1                            | Hypothetical protein (1)                                          | nucleic acid binding [GO:0003676 molecular_function] (1)                                                                                                                                                                            | Ribonuclease H-like domain [IPRO12337] (1)                                                                                                                                                                                                                                                     | -                               | -                            | P_trifoliata_00279_mRNA_3.1     |
| GF0047454 | 0                            | 0                         | 1                            | Hypothetical protein (1)                                          | nucleic acid binding [GO:0003676 molecular_function] (1)                                                                                                                                                                            | Ribonuclease H-like domain [IPRO12337] (1)                                                                                                                                                                                                                                                     | -                               | -                            | P_trifoliata_00279_mRNA_24.1    |
| GF0047453 | 0                            | 0                         | 1                            | Short hypocotyl in white light1 protein (1)                       | -                                                                                                                                                                                                                                   | -                                                                                                                                                                                                                                                                                              | -                               | -                            | P_trifoliata_00279_mRNA_17.1    |
| GF0047452 | 0                            | 0                         | 1                            | Amino acid permease 6 (1)                                         | -                                                                                                                                                                                                                                   | Amino acid transporter, transmembrane domain [IPRO13057] (1)                                                                                                                                                                                                                                   | -                               | -                            | P_trifoliata_00279_mRNA_14.1    |
| GF0047451 | 0                            | 0                         | 1                            | Cytokinin riboside 5' monophosphate phosphoribosyltransferase (1) | -                                                                                                                                                                                                                                   | -                                                                                                                                                                                                                                                                                              | -                               | -                            | P_trifoliata_00279_mRNA_1.1     |
| GF0047450 | 0                            | 0                         | 1                            | Hypothetical protein (1)                                          | -                                                                                                                                                                                                                                   | -                                                                                                                                                                                                                                                                                              | -                               | -                            | P_trifoliata_00278_mRNA_9.1     |
| GF0047449 | 0                            | 0                         | 1                            | Hypothetical protein (1)                                          | -                                                                                                                                                                                                                                   | -                                                                                                                                                                                                                                                                                              | -                               | -                            | P_trifoliata_00278_mRNA_8.1     |
| GF0047448 | 0                            | 0                         | 1                            | Hypothetical protein (1)                                          | cysteine type peptidase activity [GO:0008234 molecular_function] (1); proteolysis [GO:0006508 biological_process] (1)                                                                                                               | Domain of unknown function DUF4218 [IPRO25452] (1); Ulp1 protease family, C-terminal catalytic domain [IPRO03653] (1); Domain of unknown function DUF4216 [IPRO25312] (1)                                                                                                                      | -                               | -                            | P_trifoliata_00278_mRNA_6.1     |
| GF0047447 | 0                            | 0                         | 1                            | Hypothetical protein (1)                                          | -                                                                                                                                                                                                                                   | -                                                                                                                                                                                                                                                                                              | -                               | -                            | P_trifoliata_00278_mRNA_5.1     |
| GF0047446 | 0                            | 0                         | 1                            | Hypothetical protein (1)                                          | -                                                                                                                                                                                                                                   | Domain of unknown function DUF4219 [IPRO25314] (1)                                                                                                                                                                                                                                             | -                               | -                            | P_trifoliata_00278_mRNA_15.1    |
| GF0047445 | 0                            | 0                         | 1                            | Hypothetical protein (1)                                          | -                                                                                                                                                                                                                                   | -                                                                                                                                                                                                                                                                                              | -                               | -                            | P_trifoliata_00278_mRNA_13.1    |
| GF0047444 | 0                            | 0                         | 1                            | Hypothetical protein (1)                                          | -                                                                                                                                                                                                                                   | -                                                                                                                                                                                                                                                                                              | -                               | -                            | P_trifoliata_00278_mRNA_12.1    |
| GF0047443 | 0                            | 0                         | 1                            | Hypothetical protein (1)                                          | -                                                                                                                                                                                                                                   | -                                                                                                                                                                                                                                                                                              | -                               | -                            | P_trifoliata_00278_mRNA_10.1    |
| GF0047442 | 0                            | 0                         | 1                            | Mascivain (1)                                                     | electron carrier activity [GO:0009055 molecular_function] (1)                                                                                                                                                                       | Phytoecyanin domain [IPRO03245] (1); Cupredoxin [IPRO08972] (1)                                                                                                                                                                                                                                | -                               | -                            | P_trifoliata_00277_mRNA_4.1     |
| GF0047441 | 0                            | 0                         | 1                            | Hypothetical protein (1)                                          | -                                                                                                                                                                                                                                   | -                                                                                                                                                                                                                                                                                              | -                               | -                            | P_trifoliata_00277_mRNA_26.1    |
| GF0047440 | 0                            | 0                         | 1                            | Hypothetical protein (1)                                          | -                                                                                                                                                                                                                                   | -                                                                                                                                                                                                                                                                                              | -                               | -                            | P_trifoliata_00277_mRNA_25.1    |
| GF0047439 | 0                            | 0                         | 1                            | Hypothetical protein (1)                                          | -                                                                                                                                                                                                                                   | -                                                                                                                                                                                                                                                                                              | -                               | -                            | P_trifoliata_00277_mRNA_24.1    |
| GF0047438 | 0                            | 0                         | 1                            | Hypothetical protein (1)                                          | nucleic acid binding [GO:0003676 molecular_function] (1)                                                                                                                                                                            | Ribonuclease H-like domain [IPRO12337] (1)                                                                                                                                                                                                                                                     | -                               | -                            | P_trifoliata_00277_mRNA_18.1    |
| GF0047437 | 0                            | 0                         | 1                            | Hypothetical protein (1)                                          | -                                                                                                                                                                                                                                   | Reverse transcriptase domain [IPRO06477] (1)                                                                                                                                                                                                                                                   | -                               | -                            | P_trifoliata_00277_mRNA_17.1    |
| GF0047436 | 0                            | 0                         | 1                            | Hypothetical protein (1)                                          | -                                                                                                                                                                                                                                   | -                                                                                                                                                                                                                                                                                              | -                               | -                            | P_trifoliata_00277_mRNA_11.1    |
| GF0047435 | 0                            | 0                         | 1                            | Non-symbiotic hemoglobin (1)                                      | oxygen binding [GO:0019825 molecular_function] (1); heme binding [GO:0020037 molecular_function] (1)                                                                                                                                | Globin/Protoglobin [IPRO12292] (1); Globin-like [IPRO09050] (1); Globin [IPRO00971] (1); Leghaemoglobin, non-binding site [IPRO19824] (1); Leghaemoglobin [IPRO01032] (1)                                                                                                                      | -                               | -                            | P_trifoliata_00277_mRNA_10.1    |
| GF0047434 | 0                            | 0                         | 1                            | Hypothetical protein (1)                                          | transferase activity, transferring acyl group [GO:0016346 molecular_function] (1); metabolic process [GO:0008152 biological_process] (1)                                                                                            | E3-binding domain [IPRO04167] (1)                                                                                                                                                                                                                                                              | -                               | -                            | P_trifoliata_00277_mRNA_1.1     |
| GF0047433 | 0                            | 0                         | 1                            | Hypothetical protein (1)                                          | -                                                                                                                                                                                                                                   | -                                                                                                                                                                                                                                                                                              | -                               | -                            | P_trifoliata_00276_mRNA_33.1    |
| GF0047432 | 0                            | 0                         | 1                            | Hypothetical protein (1)                                          | -                                                                                                                                                                                                                                   | -                                                                                                                                                                                                                                                                                              | -                               | -                            | P_trifoliata_00276_mRNA_31.1    |
| GF0047431 | 0                            | 0                         | 1                            | Hypothetical protein (1)                                          | -                                                                                                                                                                                                                                   | -                                                                                                                                                                                                                                                                                              | -                               | -                            | P_trifoliata_00276_mRNA_27.1    |
| GF0047430 | 0                            | 0                         | 1                            | Adenine nucleotide alpha hydrolase-like superfamily protein (1)   | response to stress [GO:0006950 biological_process] (1)                                                                                                                                                                              | UspA [IPRO06016] (1); Rossmann-like alpha/beta/alpha sandwich fold [IPRO14729] (1)                                                                                                                                                                                                             | -                               | -                            | P_trifoliata_00276_mRNA_18.1    |
| GF0047429 | 0                            | 0                         | 1                            | Hypothetical protein (1)                                          | protein kinase activity [GO:0004672 molecular_function] (1); protein phosphorylation [GO:0006468 biological_process] (1); ATP binding [GO:0005524 molecular_function] (1)                                                           | Protein kinase domain [IPRO00719] (1); Protein kinase-like domain [IPRO11009] (1); Concavalin A-like lectin/glucanase domain [IPRO13320] (1); Serine/threonine-protein kinase, active site [IPRO08271] (1); Serine/threonine dual specificity protein kinase, catalytic domain [IPRO02290] (1) | -                               | -                            | P_trifoliata_00276_mRNA_17.1    |
| GF0047428 | 0                            | 0                         | 1                            | Hypothetical protein (1)                                          | regulation of transcription, RNA-templated [GO:0006355 biological_process] (1); response to auxin [GO:0009733 biological_process] (1)                                                                                               | FHY3/FAR1 family [IPRO31052] (1); Small antisense RNA [IPRO03676] (1); MULE transposase domain [IPRO18289] (1)                                                                                                                                                                                 | -                               | -                            | P_trifoliata_00275_mRNA_6.1     |
| GF0047426 | 0                            | 0                         | 1                            | Hypothetical protein (1)                                          | -                                                                                                                                                                                                                                   | -                                                                                                                                                                                                                                                                                              | -                               | -                            | P_trifoliata_00275_mRNA_33.1    |
| GF0047425 | 0                            | 0                         | 1                            | Hypothetical protein (1)                                          | -                                                                                                                                                                                                                                   | -                                                                                                                                                                                                                                                                                              | -                               | -                            | P_trifoliata_00275_mRNA_21.1    |
| GF0047424 | 0                            | 0                         | 1                            | Linoleol synthase (1)                                             | terpene synthase activity [GO:0010333 molecular_function] (1); lyase activity [GO:0016829 molecular_function] (1); magnesium ion binding [GO:0000287 molecular_function] (1); metabolic process [GO:0008152 biological_process] (1) | Isoprenoid synthase domain [IPRO08949] (1); Terpene synthase, N-terminal domain [IPRO01906] (1); Terpene synthase, metal-binding domain [IPRO06530] (1); Terpenoid cyclases/protein prenyltransferase alpha-alpha toroid [IPRO08930] (1)                                                       | -                               | -                            | P_trifoliata_00275_mRNA_15.1    |
| GF0047423 | 0                            | 0                         | 1                            | Hypothetical protein (1)                                          | -                                                                                                                                                                                                                                   | -                                                                                                                                                                                                                                                                                              | -                               | -                            | P_trifoliata_00275_mRNA_12.1    |
| GF0047422 | 0                            | 0                         | 1                            | AtpA (1)                                                          | zinc ion binding [GO:0008270 molecular_function] (1)                                                                                                                                                                                | Zinc finger, PMZ-type [IPRO06564] (1); Zinc finger, SWM-type [IPRO07527] (1)                                                                                                                                                                                                                   | -                               | -                            | P_trifoliata_00274_mRNA_7.1     |
| GF0047421 | 0                            | 0                         | 1                            | Hypothetical protein (1)                                          | -                                                                                                                                                                                                                                   | -                                                                                                                                                                                                                                                                                              | -                               | -                            | P_trifoliata_00274_mRNA_24.1    |
| GF0047420 | 0                            | 0                         | 1                            | Hypothetical protein (1)                                          | -                                                                                                                                                                                                                                   | -                                                                                                                                                                                                                                                                                              | -                               | -                            | P_trifoliata_00274_mRNA_2.1     |
| GF0047419 | 0                            | 0                         | 1                            | Hypothetical protein (1)                                          | ATP binding [GO:0005524 molecular_function] (1); protein phosphorylation [GO:0006468 biological_process] (1); protein kinase activity [GO:0004672 molecular_function] (1)                                                           | Protein kinase-like domain [IPRO11009] (1); Protein kinase domain [IPRO00719] (1)                                                                                                                                                                                                              | -                               | -                            | P_trifoliata_00274_mRNA_18.1    |
| GF0047418 | 0                            | 0                         | 1                            | Hypothetical protein (1)                                          | -                                                                                                                                                                                                                                   | -                                                                                                                                                                                                                                                                                              | -                               | -                            | P_trifoliata_00274_mRNA_17.1    |
| GF0047417 | 0                            | 0                         | 1                            | Hypothetical protein (1)                                          | protein dimerization activity [GO:0046983 molecular_function] (1)                                                                                                                                                                   | Plant methyltransferase dimerization [IPRO12967] (1); Winged helix-helix DNA-binding domain [IPRO11991] (1)                                                                                                                                                                                    | -                               | -                            | P_trifoliata_00274_mRNA_13.1    |
| GF0047416 | 0                            | 0                         | 1                            | Hypothetical protein (1)                                          | -                                                                                                                                                                                                                                   | -                                                                                                                                                                                                                                                                                              | -                               | -                            | P_trifoliata_00274_mRNA_12.1    |
| GF0047415 | 0                            | 0                         | 1                            | Caffeic acid 3-O-methyltransferase (1)                            | methyltransferase activity [GO:0008168 molecular_function] (1); O-methyltransferase activity [GO:0008171 molecular_function] (1)                                                                                                    | S-adenosyl-L-methionine-dependent methyltransferase [IPRO29063] (1); O-methyltransferase COMT-type [IPRO16461] (1); O-methyltransferase, family 2 [IPRO1077] (1)                                                                                                                               | -                               | -                            | P_trifoliata_00274_mRNA_11.1    |
| GF0047414 | 0                            | 0                         | 1                            | Hypothetical protein (1)                                          | -                                                                                                                                                                                                                                   | -                                                                                                                                                                                                                                                                                              | -                               | -                            | P_trifoliata_00274_mRNA_1.1     |
| GF0047413 | 0                            | 0                         | 1                            | Hypothetical protein (1)                                          | -                                                                                                                                                                                                                                   | -                                                                                                                                                                                                                                                                                              | -                               | -                            | P_trifoliata_00273_mRNA_7.1     |
| GF0047412 | 0                            | 0                         | 1                            | Hypothetical protein (1)                                          | -                                                                                                                                                                                                                                   | -                                                                                                                                                                                                                                                                                              | -                               | -                            | P_trifoliata_00273_mRNA_26.1    |
| GF0047411 | 0                            | 0                         | 1                            | Miraculin (1)                                                     | endopeptidase inhibitor activity [GO:0004866 molecular_function] (1)                                                                                                                                                                | Proteinase inhibitor I3, Kunitz legume [IPRO02160] (1); Kunitz inhibitor ST1-like [IPRO11065] (1)                                                                                                                                                                                              | -                               | -                            | P_trifoliata_00273_mRNA_25.1    |
| GF0047410 | 0                            | 0                         | 1                            | Kunitz-type protease inhibitor KP1-C1 (1)                         | endopeptidase inhibitor activity [GO:0004866 molecular_function] (1)                                                                                                                                                                | Kunitz inhibitor ST1-like [IPRO11065] (1); Proteinase inhibitor I3, Kunitz legume [IPRO02160] (1)                                                                                                                                                                                              | -                               | -                            | P_trifoliata_00273_mRNA_24.1    |
| GF0047409 | 0                            | 0                         | 1                            | Hypothetical protein (1)                                          | -                                                                                                                                                                                                                                   | -                                                                                                                                                                                                                                                                                              | -                               | -                            | P_trifoliata_00273_mRNA_23.1    |
| GF0047408 | 0                            | 0                         | 1                            | Hypothetical protein (1)                                          | Leucine-rich repeat receptor-like                                                                                                                                                                                                   | -                                                                                                                                                                                                                                                                                              | -                               | -                            | P_trifoliata_00273_mRNA_11.1    |
| GF0047407 | 0                            | 0                         | 1                            | Serine/threonine-protein kinase BAM1 (1)                          | Leucine-rich repeat domain, L domain-like [IPRO32675] (1)                                                                                                                                                                           | -                                                                                                                                                                                                                                                                                              | -                               | -                            | P_trifoliata_00273_mRNA_10.1    |
| GF0047406 | 0                            | 0                         | 1                            | Hypothetical protein (1)                                          | -                                                                                                                                                                                                                                   | -                                                                                                                                                                                                                                                                                              | -                               | -                            | P_trifoliata_00273_mRNA_1.1     |
| GF0047405 | 0                            | 0                         | 1                            | Transposase (1)                                                   | -                                                                                                                                                                                                                                   | Transposon, En/Spm-like [IPRO04242] (1)                                                                                                                                                                                                                                                        | -                               | -                            | P_trifoliata_00272_mRNA_9.1     |
| GF0047404 | 0                            | 0                         | 1                            | Hypothetical protein (1)                                          | oxidation-reduction process [GO:0055114 biological_process] (1); oxidoreductase activity [GO:0016491 molecular_function] (1)                                                                                                        | Isopenicillin N synthase-like [IPRO27443] (1); Oxoglutarate/iron-dependent dioxygenase [IPRO05123] (1)                                                                                                                                                                                         | -                               | -                            | P_trifoliata_00272_mRNA_39.1    |
| GF0047403 | 0                            | 0                         | 1                            | Acetyl-coenzyme A synthetase (1)                                  | catalytic activity [GO:0003824 molecular_function] (1); metabolic process [GO:0008152 biological_process] (1)                                                                                                                       | AMP-dependent synthetase/ligase [IPRO00873] (1); AMP-binding, conserved site [IPRO20845] (1)                                                                                                                                                                                                   | -                               | -                            | P_trifoliata_00272_mRNA_34.1    |
| GF0047402 | 0                            | 0                         | 1                            | Hypothetical protein (1)                                          | -                                                                                                                                                                                                                                   | -                                                                                                                                                                                                                                                                                              | -                               | -                            | P_trifoliata_00272_mRNA_27.1    |
| GF0047401 | 0                            | 0                         | 1                            | Hypothetical protein (1)                                          | -                                                                                                                                                                                                                                   | -                                                                                                                                                                                                                                                                                              | -                               | -                            | P_trifoliata_00272_mRNA_25.1    |

| ID        | Num. in <i>C. celeratae</i> | Num. in <i>C. canihii</i> | Num. in <i>P. trifoliata</i> | Note                                                            | GO                                                                                                                                                                                                                                                                                                                                                                      | InterPro                                                                                                                                                                                                                                                                                                     | Members in <i>C. celeratae</i> | Members in <i>C. canihii</i> | Members in <i>P. trifoliata</i> |
|-----------|-----------------------------|---------------------------|------------------------------|-----------------------------------------------------------------|-------------------------------------------------------------------------------------------------------------------------------------------------------------------------------------------------------------------------------------------------------------------------------------------------------------------------------------------------------------------------|--------------------------------------------------------------------------------------------------------------------------------------------------------------------------------------------------------------------------------------------------------------------------------------------------------------|--------------------------------|------------------------------|---------------------------------|
| GF0047400 | 0                           | 0                         | 1                            | Hypothetical protein (1)                                        |                                                                                                                                                                                                                                                                                                                                                                         |                                                                                                                                                                                                                                                                                                              | -                              | -                            | P_trifoliata_00272_mRNA_24.1    |
| GF0047399 | 0                           | 0                         | 1                            | Hypothetical protein (1)                                        |                                                                                                                                                                                                                                                                                                                                                                         |                                                                                                                                                                                                                                                                                                              | -                              | -                            | P_trifoliata_00272_mRNA_23.1    |
| GF0047398 | 0                           | 0                         | 1                            | Hypothetical protein (1)                                        |                                                                                                                                                                                                                                                                                                                                                                         |                                                                                                                                                                                                                                                                                                              | -                              | -                            | P_trifoliata_00272_mRNA_22.1    |
| GF0047397 | 0                           | 0                         | 1                            | Hypothetical protein (1)                                        |                                                                                                                                                                                                                                                                                                                                                                         |                                                                                                                                                                                                                                                                                                              | -                              | -                            | P_trifoliata_00272_mRNA_21.1    |
| GF0047396 | 0                           | 0                         | 1                            | Hypothetical protein (1)                                        |                                                                                                                                                                                                                                                                                                                                                                         |                                                                                                                                                                                                                                                                                                              | -                              | -                            | P_trifoliata_00272_mRNA_20.1    |
| GF0047395 | 0                           | 0                         | 1                            | Hypothetical protein (1)                                        | nucleic acid binding [GO:0003676 molecular_function] (1)                                                                                                                                                                                                                                                                                                                | Ribonuclease H-like domain [IPR012337] (1)                                                                                                                                                                                                                                                                   | -                              | -                            | P_trifoliata_00272_mRNA_19.1    |
| GF0047394 | 0                           | 0                         | 1                            | Hypothetical protein (1)                                        | DNA integration [GO:0015074 biological_process] (1); nucleic acid binding [GO:0003676 molecular_function] (1)                                                                                                                                                                                                                                                           | Ribonuclease H-like domain [IPR012337] (1); Integrase, catalytic core [IPR01584] (1)                                                                                                                                                                                                                         | -                              | -                            | P_trifoliata_00272_mRNA_18.1    |
| GF0047393 | 0                           | 0                         | 1                            | Hypothetical protein (1)                                        |                                                                                                                                                                                                                                                                                                                                                                         |                                                                                                                                                                                                                                                                                                              | -                              | -                            | P_trifoliata_00272_mRNA_16.1    |
| GF0047392 | 0                           | 0                         | 1                            | Hypothetical protein (1)                                        |                                                                                                                                                                                                                                                                                                                                                                         |                                                                                                                                                                                                                                                                                                              | -                              | -                            | P_trifoliata_00272_mRNA_15.1    |
| GF0047391 | 0                           | 0                         | 1                            | Hypothetical protein (1)                                        |                                                                                                                                                                                                                                                                                                                                                                         |                                                                                                                                                                                                                                                                                                              | -                              | -                            | P_trifoliata_00272_mRNA_13.1    |
| GF0047390 | 0                           | 0                         | 1                            | Hypothetical protein (1)                                        |                                                                                                                                                                                                                                                                                                                                                                         |                                                                                                                                                                                                                                                                                                              | -                              | -                            | P_trifoliata_00272_mRNA_11.1    |
| GF0047389 | 0                           | 0                         | 1                            | Hypothetical protein (1)                                        |                                                                                                                                                                                                                                                                                                                                                                         |                                                                                                                                                                                                                                                                                                              | -                              | -                            | P_trifoliata_00271_mRNA_26.1    |
| GF0047388 | 0                           | 0                         | 1                            | Retrotransposon protein, putative, unclassified (1)             |                                                                                                                                                                                                                                                                                                                                                                         |                                                                                                                                                                                                                                                                                                              | -                              | -                            | P_trifoliata_00271_mRNA_25.1    |
| GF0047387 | 0                           | 0                         | 1                            | Ribose-phosphate diphosphokinase (1)                            | cellular biosynthetic process [GO:0044249 biological_process] (1); nucleotide biosynthetic process [GO:0001655 biological_process] (1); ribonucleoside monophosphate biosynthetic process [GO:0009156 biological_process] (1); ribose phosphate diphosphokinase activity [GO:0004749 molecular_function] (1); magnesium ion binding [GO:0000287 molecular_function] (1) | Phosphoribosyl pyrophosphate synthetase, conserved site [IPR000842] (1); Ribose-phosphate diphosphokinase [IPR05946] (1); Ribose-phosphate pyrophosphokinase, N-terminal domain [IPR029099] (1); Phosphoribosyltransferase-like [IPR029057] (1)                                                              | -                              | -                            | P_trifoliata_00271_mRNA_19.1    |
| GF0047386 | 0                           | 0                         | 1                            | Hypothetical protein (1)                                        |                                                                                                                                                                                                                                                                                                                                                                         |                                                                                                                                                                                                                                                                                                              | -                              | -                            | P_trifoliata_00270_mRNA_45.1    |
| GF0047385 | 0                           | 0                         | 1                            | Hypothetical protein (1)                                        |                                                                                                                                                                                                                                                                                                                                                                         |                                                                                                                                                                                                                                                                                                              | -                              | -                            | P_trifoliata_00270_mRNA_4.1     |
| GF0047384 | 0                           | 0                         | 1                            | Hypothetical protein (1)                                        |                                                                                                                                                                                                                                                                                                                                                                         |                                                                                                                                                                                                                                                                                                              | -                              | -                            | P_trifoliata_00270_mRNA_33.1    |
| GF0047383 | 0                           | 0                         | 1                            | Non-LTR retroelement reverse transcriptase-like (1)             | nucleic acid binding [GO:0003676 molecular_function] (1); RNA-DNA hybrid ribonuclease activity [GO:0004523 molecular_function] (1)                                                                                                                                                                                                                                      | Reverse transcriptase zinc-binding domain [IPR026960] (1); Ribonuclease H-like domain [IPR012337] (1); Ribonuclease H domain [IPR002156] (1)                                                                                                                                                                 | -                              | -                            | P_trifoliata_00270_mRNA_29.1    |
| GF0047382 | 0                           | 0                         | 1                            | Hypothetical protein (1)                                        |                                                                                                                                                                                                                                                                                                                                                                         |                                                                                                                                                                                                                                                                                                              | -                              | -                            | P_trifoliata_00270_mRNA_23.1    |
| GF0047381 | 0                           | 0                         | 1                            | Endomembrane protein 70 protein family isoform 1 (1)            | integral component of membrane [GO:0016021 cellular_component] (1)                                                                                                                                                                                                                                                                                                      | Nonaquatin (TM9SF) [IPR004240] (1)                                                                                                                                                                                                                                                                           | -                              | -                            | P_trifoliata_00270_mRNA_2.1     |
| GF0047380 | 0                           | 0                         | 1                            | Hypothetical protein (1)                                        | nucleic acid binding [GO:0003676 molecular_function] (1); zinc ion binding [GO:0008270 molecular_function] (1)                                                                                                                                                                                                                                                          | Domain of unknown function DUF4283 [IPR025558] (1); Zinc finger, CCHC-type [IPR01878] (1); Zinc knuckle CXCXC4HX4C [IPR025836] (1)                                                                                                                                                                           | -                              | -                            | P_trifoliata_00270_mRNA_15.1    |
| GF0047379 | 0                           | 0                         | 1                            | Hypothetical protein (1)                                        |                                                                                                                                                                                                                                                                                                                                                                         |                                                                                                                                                                                                                                                                                                              | -                              | -                            | P_trifoliata_00270_mRNA_13.1    |
| GF0047378 | 0                           | 0                         | 1                            | Hypothetical protein (1)                                        |                                                                                                                                                                                                                                                                                                                                                                         |                                                                                                                                                                                                                                                                                                              | -                              | -                            | P_trifoliata_00269_mRNA_44.1    |
| GF0047377 | 0                           | 0                         | 1                            | Hypothetical protein (1)                                        |                                                                                                                                                                                                                                                                                                                                                                         |                                                                                                                                                                                                                                                                                                              | -                              | -                            | P_trifoliata_00269_mRNA_43.1    |
| GF0047376 | 0                           | 0                         | 1                            | Hypothetical protein (1)                                        |                                                                                                                                                                                                                                                                                                                                                                         |                                                                                                                                                                                                                                                                                                              | -                              | -                            | P_trifoliata_00269_mRNA_41.1    |
| GF0047375 | 0                           | 0                         | 1                            | Hypothetical protein (1)                                        |                                                                                                                                                                                                                                                                                                                                                                         |                                                                                                                                                                                                                                                                                                              | -                              | -                            | P_trifoliata_00269_mRNA_36.1    |
| GF0047374 | 0                           | 0                         | 1                            | Hypothetical protein (1)                                        |                                                                                                                                                                                                                                                                                                                                                                         |                                                                                                                                                                                                                                                                                                              | -                              | -                            | P_trifoliata_00269_mRNA_35.1    |
| GF0047373 | 0                           | 0                         | 1                            | Hypothetical protein (1)                                        |                                                                                                                                                                                                                                                                                                                                                                         |                                                                                                                                                                                                                                                                                                              | -                              | -                            | P_trifoliata_00269_mRNA_33.1    |
| GF0047372 | 0                           | 0                         | 1                            | Hypothetical protein (1)                                        |                                                                                                                                                                                                                                                                                                                                                                         |                                                                                                                                                                                                                                                                                                              | -                              | -                            | P_trifoliata_00269_mRNA_32.1    |
| GF0047371 | 0                           | 0                         | 1                            | Hypothetical protein (1)                                        |                                                                                                                                                                                                                                                                                                                                                                         |                                                                                                                                                                                                                                                                                                              | -                              | -                            | P_trifoliata_00269_mRNA_30.1    |
| GF0047370 | 0                           | 0                         | 1                            | Hypothetical protein (1)                                        |                                                                                                                                                                                                                                                                                                                                                                         |                                                                                                                                                                                                                                                                                                              | -                              | -                            | P_trifoliata_00269_mRNA_25.1    |
| GF0047369 | 0                           | 0                         | 1                            | Hypothetical protein (1)                                        |                                                                                                                                                                                                                                                                                                                                                                         |                                                                                                                                                                                                                                                                                                              | -                              | -                            | P_trifoliata_00269_mRNA_22.1    |
| GF0047368 | 0                           | 0                         | 1                            | Hypothetical protein (1)                                        |                                                                                                                                                                                                                                                                                                                                                                         |                                                                                                                                                                                                                                                                                                              | -                              | -                            | P_trifoliata_00269_mRNA_11.1    |
| GF0047367 | 0                           | 0                         | 1                            | Hypothetical protein (1)                                        |                                                                                                                                                                                                                                                                                                                                                                         |                                                                                                                                                                                                                                                                                                              | -                              | -                            | P_trifoliata_00269_mRNA_1.1     |
| GF0047366 | 0                           | 0                         | 1                            | Hypothetical protein (1)                                        | glucose metabolic process [GO:0006006 biological_process] (1); oxidation-reduction process [GO:005114 biological_process] (1); glucose-6-phosphate dehydrogenase activity [GO:0004345 molecular_function] (1); NADP binding [GO:0005061 molecular_function] (1)                                                                                                         | Glucose-6-phosphate dehydrogenase [IPR001282] (1); Glucose-6-phosphate dehydrogenase, C-terminal [IPR022675] (1)                                                                                                                                                                                             | -                              | -                            | P_trifoliata_00268_mRNA_31.1    |
| GF0047365 | 0                           | 0                         | 1                            | Hypothetical protein (1)                                        | glucose metabolic process [GO:0006006 biological_process] (1); glucose-6-phosphate dehydrogenase activity [GO:0004345 molecular_function] (1); oxidation-reduction process [GO:005114 biological_process] (1); NADP binding [GO:0005061 molecular_function] (1)                                                                                                         | Glucose-6-phosphate dehydrogenase, C-terminal [IPR022675] (1); Glucose-6-phosphate dehydrogenase [IPR01282] (1)                                                                                                                                                                                              | -                              | -                            | P_trifoliata_00268_mRNA_27.1    |
| GF0047364 | 0                           | 0                         | 1                            | Hypothetical protein (1)                                        | cysteine-type peptidase activity [GO:0008234 molecular_function] (1); proteolysis [GO:0006508 biological_process] (1)                                                                                                                                                                                                                                                   | Ulp1 protease family, C-terminal catalytic domain [IPR003653] (1)                                                                                                                                                                                                                                            | -                              | -                            | P_trifoliata_00268_mRNA_22.1    |
| GF0047363 | 0                           | 0                         | 1                            | NB-ARC domain disease resistance protein (1)                    | ADP binding [GO:0043531 molecular_function] (1)                                                                                                                                                                                                                                                                                                                         | Leucine-rich repeat domain, L domain-like [IPR02675] (1); NB-ARC [IPR02182] (1); P-loop containing nucleoside triphosphate hydrolase [IPR02747] (1)                                                                                                                                                          | -                              | -                            | P_trifoliata_00268_mRNA_2.1     |
| GF0047362 | 0                           | 0                         | 1                            | FACT complex subunit SPT16 (1)                                  |                                                                                                                                                                                                                                                                                                                                                                         | Peptidase M24, structural domain [IPR00994] (1); Creatinase/Aminopeptidase P/Spt16, N-terminal [IPR029149] (1); FACT complex subunit Spt16, N-terminal lobe domain [IPR029148] (1)                                                                                                                           | -                              | -                            | P_trifoliata_00268_mRNA_13.1    |
| GF0047361 | 0                           | 0                         | 1                            | Hypothetical protein (1)                                        | regulation of transcription, DNA-templated [GO:0006355 biological_process] (1)                                                                                                                                                                                                                                                                                          | FAR1 DNA binding domain [IPR004330] (1); FLY3/FAR1 family [IPR01052] (1)                                                                                                                                                                                                                                     | -                              | -                            | P_trifoliata_00268_mRNA_11.1    |
| GF0047360 | 0                           | 0                         | 1                            | Hypothetical protein (1)                                        |                                                                                                                                                                                                                                                                                                                                                                         | Transposase-associated domain [IPR029480] (1)                                                                                                                                                                                                                                                                | -                              | -                            | P_trifoliata_00267_mRNA_7.1     |
| GF0047359 | 0                           | 0                         | 1                            | Hypothetical protein (1)                                        | nucleic acid binding [GO:0003676 molecular_function] (1); zinc ion binding [GO:0008270 molecular_function] (1)                                                                                                                                                                                                                                                          | Domain of unknown function DUF1985 [IPR015410] (1); Zinc finger, CCHC-type [IPR01878] (1)                                                                                                                                                                                                                    | -                              | -                            | P_trifoliata_00267_mRNA_29.1    |
| GF0047358 | 0                           | 0                         | 1                            | Hypothetical protein (1)                                        |                                                                                                                                                                                                                                                                                                                                                                         | Domain unknown function DUF295 [IPR061574] (1)                                                                                                                                                                                                                                                               | -                              | -                            | P_trifoliata_00267_mRNA_28.1    |
| GF0047357 | 0                           | 0                         | 1                            | Hypothetical protein (1)                                        |                                                                                                                                                                                                                                                                                                                                                                         | LysM domain [IPR018392] (1)                                                                                                                                                                                                                                                                                  | -                              | -                            | P_trifoliata_00267_mRNA_27.1    |
| GF0047356 | 0                           | 0                         | 1                            | Hypothetical protein (1)                                        |                                                                                                                                                                                                                                                                                                                                                                         |                                                                                                                                                                                                                                                                                                              | -                              | -                            | P_trifoliata_00267_mRNA_23.1    |
| GF0047355 | 0                           | 0                         | 1                            | Hypothetical protein (1)                                        | nucleic acid binding [GO:0003676 molecular_function] (1)                                                                                                                                                                                                                                                                                                                | Ribonuclease H-like domain [IPR012337] (1)                                                                                                                                                                                                                                                                   | -                              | -                            | P_trifoliata_00267_mRNA_2.1     |
| GF0047354 | 0                           | 0                         | 1                            | RNA-directed DNA polymerase, related (1)                        |                                                                                                                                                                                                                                                                                                                                                                         | Reverse transcriptase domain [IPR00477] (1)                                                                                                                                                                                                                                                                  | -                              | -                            | P_trifoliata_00267_mRNA_18.1    |
| GF0047353 | 0                           | 0                         | 1                            | Hypothetical protein (1)                                        |                                                                                                                                                                                                                                                                                                                                                                         |                                                                                                                                                                                                                                                                                                              | -                              | -                            | P_trifoliata_00267_mRNA_11.1    |
| GF0047352 | 0                           | 0                         | 1                            | Hypothetical protein (1)                                        | cysteine-type peptidase activity [GO:0008234 molecular_function] (1); DNA binding [GO:0003677 molecular_function] (1); protein dimerization activity [GO:0046983 molecular_function] (1); proteolysis [GO:0006508 biological_process] (1)                                                                                                                               | Ulp1 protease family, C-terminal catalytic domain [IPR003653] (1); Achate-scute transcription factor-related [IPR015660] (1); Myo-type, basic helix-loop-helix (SHL1) domain [IPR011598] (1)                                                                                                                 | -                              | -                            | P_trifoliata_00266_mRNA_6.1     |
| GF0047351 | 0                           | 0                         | 1                            | Hypothetical protein (1)                                        |                                                                                                                                                                                                                                                                                                                                                                         |                                                                                                                                                                                                                                                                                                              | -                              | -                            | P_trifoliata_00266_mRNA_4.1     |
| GF0047350 | 0                           | 0                         | 1                            | AtpA (1)                                                        |                                                                                                                                                                                                                                                                                                                                                                         |                                                                                                                                                                                                                                                                                                              | -                              | -                            | P_trifoliata_00266_mRNA_33.1    |
| GF0047349 | 0                           | 0                         | 1                            | Hypothetical protein (1)                                        |                                                                                                                                                                                                                                                                                                                                                                         |                                                                                                                                                                                                                                                                                                              | -                              | -                            | P_trifoliata_00266_mRNA_19.1    |
| GF0047348 | 0                           | 0                         | 1                            | Hypothetical protein (1)                                        | transferase activity, transferring acyl groups other than amino-acyl groups [GO:0016747 molecular_function] (1)                                                                                                                                                                                                                                                         | Transferase [IPR003480] (1); Domain of unknown function DUF4283 [IPR025558] (1); Chloromethyl acetyltransferase-like domain [IPR023213] (1)                                                                                                                                                                  | -                              | -                            | P_trifoliata_00266_mRNA_13.1    |
| GF0047347 | 0                           | 0                         | 1                            | Leucine-rich repeat protein kinase family protein, putative (1) | protein kinase activity [GO:0004672 molecular_function] (1); protein phosphorylation [GO:0006468 biological_process] (1); ATP binding [GO:0005524 molecular_function] (1)                                                                                                                                                                                               | Serine/threonine dual specificity protein kinase, catalytic domain [IPR002290] (1); Serine/threonine-protein kinase, active site [IPR00271] (1); Serine/threonine/tyrosine-protein kinase catalytic domain [IPR001245] (1); Protein kinase domain [IPR00719] (1); Protein kinase-like domain [IPR011009] (1) | -                              | -                            | P_trifoliata_00266_mRNA_10.1    |
| GF0047346 | 0                           | 0                         | 1                            | Hypothetical protein (1)                                        |                                                                                                                                                                                                                                                                                                                                                                         |                                                                                                                                                                                                                                                                                                              | -                              | -                            | P_trifoliata_00266_mRNA_1.1     |
| GF0047345 | 0                           | 0                         | 1                            | Hypothetical protein (1)                                        |                                                                                                                                                                                                                                                                                                                                                                         | Retrotransposon gag domain [IPR005162] (1)                                                                                                                                                                                                                                                                   | -                              | -                            | P_trifoliata_00265_mRNA_8.1     |
| GF0047344 | 0                           | 0                         | 1                            | Hypothetical protein (1)                                        |                                                                                                                                                                                                                                                                                                                                                                         |                                                                                                                                                                                                                                                                                                              | -                              | -                            | P_trifoliata_00265_mRNA_5.1     |
| GF0047343 | 0                           | 0                         | 1                            | Hypothetical protein (1)                                        |                                                                                                                                                                                                                                                                                                                                                                         |                                                                                                                                                                                                                                                                                                              | -                              | -                            | P_trifoliata_00265_mRNA_35.1    |
| GF0047342 | 0                           | 0                         | 1                            | Hypothetical protein (1)                                        |                                                                                                                                                                                                                                                                                                                                                                         |                                                                                                                                                                                                                                                                                                              | -                              | -                            | P_trifoliata_00265_mRNA_33.1    |
| GF0047341 | 0                           | 0                         | 1                            | Hypothetical protein (1)                                        |                                                                                                                                                                                                                                                                                                                                                                         |                                                                                                                                                                                                                                                                                                              | -                              | -                            | P_trifoliata_00265_mRNA_32.1    |
| GF0047340 | 0                           | 0                         | 1                            | Hypothetical protein (1)                                        |                                                                                                                                                                                                                                                                                                                                                                         |                                                                                                                                                                                                                                                                                                              | -                              | -                            | P_trifoliata_00265_mRNA_30.1    |
| GF0047339 | 0                           | 0                         | 1                            | Cytosolic ribovide 5'-methylphosphate phosphoribohydrolase (1)  |                                                                                                                                                                                                                                                                                                                                                                         | LOG family [IPR031100] (1)                                                                                                                                                                                                                                                                                   | -                              | -                            | P_trifoliata_00265_mRNA_29.1    |
| GF0047338 | 0                           | 0                         | 1                            | Hypothetical protein (1)                                        |                                                                                                                                                                                                                                                                                                                                                                         |                                                                                                                                                                                                                                                                                                              | -                              | -                            | P_trifoliata_00265_mRNA_25.1    |
| GF0047337 | 0                           | 0                         | 1                            | Hypothetical protein (1)                                        |                                                                                                                                                                                                                                                                                                                                                                         |                                                                                                                                                                                                                                                                                                              | -                              | -                            | P_trifoliata_00265_mRNA_24.1    |
| GF0047336 | 0                           | 0                         | 1                            | Hypothetical protein (1)                                        |                                                                                                                                                                                                                                                                                                                                                                         |                                                                                                                                                                                                                                                                                                              | -                              | -                            | P_trifoliata_00265_mRNA_20.1    |
| GF0047335 | 0                           | 0                         | 1                            | Hypothetical protein (1)                                        |                                                                                                                                                                                                                                                                                                                                                                         |                                                                                                                                                                                                                                                                                                              | -                              | -                            | P_trifoliata_00265_mRNA_2.1     |
| GF0047334 | 0                           | 0                         | 1                            | Hypothetical protein (1)                                        |                                                                                                                                                                                                                                                                                                                                                                         |                                                                                                                                                                                                                                                                                                              | -                              | -                            | P_trifoliata_00265_mRNA_19.1    |
| GF0047333 | 0                           | 0                         | 1                            | Hypothetical protein (1)                                        |                                                                                                                                                                                                                                                                                                                                                                         |                                                                                                                                                                                                                                                                                                              | -                              | -                            | P_trifoliata_00265_mRNA_16.1    |
| GF0047332 | 0                           | 0                         | 1                            | Hypothetical protein (1)                                        |                                                                                                                                                                                                                                                                                                                                                                         |                                                                                                                                                                                                                                                                                                              | -                              | -                            | P_trifoliata_00265_mRNA_12.1    |

| ID        | Num. in <i>C. clementiae</i> | Num. in <i>C. canthii</i> | Num. in <i>P. trifoliata</i> | Note                                                                                | GO                                                                                                                                                                                                                                                                                                                                                                           | InterPro                                                                                                                                                                                                                            | Members in <i>C. clementiae</i> | Members in <i>C. canthii</i> | Members in <i>P. trifoliata</i> |
|-----------|------------------------------|---------------------------|------------------------------|-------------------------------------------------------------------------------------|------------------------------------------------------------------------------------------------------------------------------------------------------------------------------------------------------------------------------------------------------------------------------------------------------------------------------------------------------------------------------|-------------------------------------------------------------------------------------------------------------------------------------------------------------------------------------------------------------------------------------|---------------------------------|------------------------------|---------------------------------|
| GF0047331 | 0                            | 0                         | 0                            | 1 Hypothetical protein (1)                                                          |                                                                                                                                                                                                                                                                                                                                                                              |                                                                                                                                                                                                                                     | -                               | -                            | P_trifoliata_00264_mRNA_9.1     |
| GF0047330 | 0                            | 0                         | 0                            | 1 Hypothetical protein (1)                                                          |                                                                                                                                                                                                                                                                                                                                                                              |                                                                                                                                                                                                                                     | -                               | -                            | P_trifoliata_00264_mRNA_7.1     |
| GF0047329 | 0                            | 0                         | 0                            | 1 Hypothetical protein (1)                                                          |                                                                                                                                                                                                                                                                                                                                                                              |                                                                                                                                                                                                                                     | -                               | -                            | P_trifoliata_00264_mRNA_6.1     |
| GF0047328 | 0                            | 0                         | 0                            | 1 Hypothetical protein (1)                                                          |                                                                                                                                                                                                                                                                                                                                                                              |                                                                                                                                                                                                                                     | -                               | -                            | P_trifoliata_00264_mRNA_30.1    |
| GF0047327 | 0                            | 0                         | 0                            | 1 Hypothetical protein (1)                                                          | regulation of transcription, DNA-templated [GO:0006355]<br>biological_process (1); double-stranded DNA binding [GO:0001696]<br>molecular_function (1); mitochondrion [GO:005739 cellular_component] (1)                                                                                                                                                                      | Mitochondrial transcription termination factor [IPR003690] (1)                                                                                                                                                                      | -                               | -                            | P_trifoliata_00264_mRNA_29.1    |
| GF0047326 | 0                            | 0                         | 0                            | 1 Hypothetical protein (1)                                                          |                                                                                                                                                                                                                                                                                                                                                                              | Domain of unknown function DUF632 [IPR006867] (1)                                                                                                                                                                                   | -                               | -                            | P_trifoliata_00264_mRNA_26.1    |
| GF0047325 | 0                            | 0                         | 0                            | 1 Phenylcoumaran benzylic ether reductase-like protein (1)                          |                                                                                                                                                                                                                                                                                                                                                                              | Nera-A-like domain [IPR008030] (1); NAD(P)-binding domain [IPR016040] (1)                                                                                                                                                           | -                               | -                            | P_trifoliata_00264_mRNA_24.1    |
| GF0047324 | 0                            | 0                         | 0                            | 1 Hypothetical protein (1)                                                          |                                                                                                                                                                                                                                                                                                                                                                              |                                                                                                                                                                                                                                     | -                               | -                            | P_trifoliata_00264_mRNA_23.1    |
| GF0047323 | 0                            | 0                         | 0                            | 1 Hypothetical protein (1)                                                          |                                                                                                                                                                                                                                                                                                                                                                              |                                                                                                                                                                                                                                     | -                               | -                            | P_trifoliata_00264_mRNA_17.1    |
| GF0047322 | 0                            | 0                         | 0                            | 1 Hypothetical protein (1)                                                          |                                                                                                                                                                                                                                                                                                                                                                              |                                                                                                                                                                                                                                     | -                               | -                            | P_trifoliata_00264_mRNA_14.1    |
| GF0047321 | 0                            | 0                         | 0                            | 1 Hypothetical protein (1)                                                          |                                                                                                                                                                                                                                                                                                                                                                              |                                                                                                                                                                                                                                     | -                               | -                            | P_trifoliata_00264_mRNA_12.1    |
| GF0047320 | 0                            | 0                         | 0                            | 1 Hypothetical protein (1)                                                          |                                                                                                                                                                                                                                                                                                                                                                              |                                                                                                                                                                                                                                     | -                               | -                            | P_trifoliata_00264_mRNA_10.1    |
| GF0047319 | 0                            | 0                         | 0                            | 1 Hypothetical protein (1)                                                          |                                                                                                                                                                                                                                                                                                                                                                              |                                                                                                                                                                                                                                     | -                               | -                            | P_trifoliata_00263_mRNA_50.1    |
| GF0047318 | 0                            | 0                         | 0                            | 1 Hypothetical protein (1)                                                          |                                                                                                                                                                                                                                                                                                                                                                              | Uncharacterised protein family, basic secretory protein [IPR007541] (1); Cullin repeat-like-containing domain [IPR016159] (1)                                                                                                       | -                               | -                            | P_trifoliata_00263_mRNA_49.1    |
| GF0047317 | 0                            | 0                         | 0                            | 1 Plant basic secretory family protein (1)                                          |                                                                                                                                                                                                                                                                                                                                                                              | Uncharacterised protein family, basic secretory protein [IPR007541] (1)                                                                                                                                                             | -                               | -                            | P_trifoliata_00263_mRNA_44.1    |
| GF0047316 | 0                            | 0                         | 0                            | 1 UPP651 protein (1)                                                                |                                                                                                                                                                                                                                                                                                                                                                              | Complex 1 LYR protein [IPR008011] (1)                                                                                                                                                                                               | -                               | -                            | P_trifoliata_00263_mRNA_34.1    |
| GF0047315 | 0                            | 0                         | 0                            | 1 Hypothetical protein (1)                                                          | amino acid transmembrane transporter activity [GO:0015171]<br>molecular_function (1); amino acid transmembrane transport [GO:0003333 biological_process] (1); membrane [GO:0016020 cellular_component] (1)                                                                                                                                                                   | Amino acid/polyamine transporter 1 [IPR002293] (1)                                                                                                                                                                                  | -                               | -                            | P_trifoliata_00263_mRNA_3.1     |
| GF0047314 | 0                            | 0                         | 0                            | 1 Hypothetical protein (1)                                                          | nucleus [GO:0005634 cellular_component] (1)                                                                                                                                                                                                                                                                                                                                  | Cyclin, C-terminal domain [IPR004367] (1); Cyclin A, plant [IPR029507] (1); Cyclin-like [IPR013763] (1)                                                                                                                             | -                               | -                            | P_trifoliata_00263_mRNA_24.1    |
| GF0047313 | 0                            | 0                         | 0                            | 1 Hypothetical protein (1)                                                          |                                                                                                                                                                                                                                                                                                                                                                              | GH3 family [IPR004993] (1)                                                                                                                                                                                                          | -                               | -                            | P_trifoliata_00263_mRNA_18.1    |
| GF0047312 | 0                            | 0                         | 0                            | 1 Hypothetical protein (1)                                                          |                                                                                                                                                                                                                                                                                                                                                                              | Reverse transcriptase zinc-binding domain [IPR026960] (1)                                                                                                                                                                           | -                               | -                            | P_trifoliata_00263_mRNA_13.1    |
| GF0047311 | 0                            | 0                         | 0                            | 1 Hypothetical protein (1)                                                          | oxidation-reduction process [GO:005114 biological_process] (1); thiol oxidase activity [GO:0016972 molecular_function] (1)                                                                                                                                                                                                                                                   | ERV/ALR sulfhydryl oxidase domain [IPR017905] (1)                                                                                                                                                                                   | -                               | -                            | P_trifoliata_00263_mRNA_1.1     |
| GF0047310 | 0                            | 0                         | 0                            | 1 Hypothetical protein (1)                                                          |                                                                                                                                                                                                                                                                                                                                                                              | Leucine-rich repeat domain, L domain-like [IPR032675] (1)                                                                                                                                                                           | -                               | -                            | P_trifoliata_00262_mRNA_5.1     |
| GF0047309 | 0                            | 0                         | 0                            | 1 Hypothetical protein (1)                                                          |                                                                                                                                                                                                                                                                                                                                                                              |                                                                                                                                                                                                                                     | -                               | -                            | P_trifoliata_00262_mRNA_36.1    |
| GF0047308 | 0                            | 0                         | 0                            | 1 Retinulin oxidase-like protein (1)                                                | flavin adenine dinucleotide binding [GO:0005060 molecular_function] (1); oxidation-reduction process [GO:005114 biological_process] (1); oxidoreductase activity [GO:0016491 molecular_function] (1); catalytic activity [GO:0003824 molecular_function] (1); oxidoreductase activity, acting on CH-OH group of donors [GO:0016614 molecular_function] (1)                   | CO dehydrogenase flavoprotein-like, FAD-binding, subdomain 2 [IPR016169] (1); FAD-binding, type 2, subdomain 1 [IPR016167] (1); FAD-binding, type 2 [IPR016166] (1); FAD linked oxidase, N-terminal [IPR006094] (1)                 | -                               | -                            | P_trifoliata_00262_mRNA_34.1    |
| GF0047307 | 0                            | 0                         | 0                            | 1 Hypothetical protein (1)                                                          |                                                                                                                                                                                                                                                                                                                                                                              | Leucine-rich repeat-containing N-terminal, plant-type [IPR013210] (1)                                                                                                                                                               | -                               | -                            | P_trifoliata_00262_mRNA_32.1    |
| GF0047306 | 0                            | 0                         | 0                            | 1 LRR receptor-like kinase (1)                                                      | protein binding [GO:000515 molecular_function] (1)                                                                                                                                                                                                                                                                                                                           | Leucine-rich repeat domain, L domain-like [IPR032675] (1); Leucine-rich repeat [IPR001611] (1)                                                                                                                                      | -                               | -                            | P_trifoliata_00262_mRNA_30.1    |
| GF0047305 | 0                            | 0                         | 0                            | 1 Hypothetical protein (1)                                                          | iron ion binding [GO:000506 molecular_function] (1); heme binding [GO:0020037 molecular_function] (1); monooxygenase activity [GO:0004497 molecular_function] (1); oxidoreductase activity, acting on paired donors, with incorporation or reduction of molecular oxygen [GO:0016705 molecular_function] (1); oxidation-reduction process [GO:005114 biological_process] (1) | Cytochrome P450, C-class, group IV [IPR002403] (1); Cytochrome P450 [IPR001128] (1)                                                                                                                                                 | -                               | -                            | P_trifoliata_00262_mRNA_28.1    |
| GF0047304 | 0                            | 0                         | 0                            | 1 Hypothetical protein (1)                                                          |                                                                                                                                                                                                                                                                                                                                                                              |                                                                                                                                                                                                                                     | -                               | -                            | P_trifoliata_00262_mRNA_27.1    |
| GF0047303 | 0                            | 0                         | 0                            | 1 Hypothetical protein (1)                                                          |                                                                                                                                                                                                                                                                                                                                                                              | Alpha crystallin/Hsp20 domain [IPR02068] (1); HSP20-like chaperone [IPR008978] (1); Small heat shock protein HSP20 [IPR031107] (1)                                                                                                  | -                               | -                            | P_trifoliata_00262_mRNA_26.1    |
| GF0047302 | 0                            | 0                         | 0                            | 1 Hypothetical protein (1)                                                          |                                                                                                                                                                                                                                                                                                                                                                              |                                                                                                                                                                                                                                     | -                               | -                            | P_trifoliata_00262_mRNA_24.1    |
| GF0047301 | 0                            | 0                         | 0                            | 1 Putative disease resistance RPP13-like protein (1)                                |                                                                                                                                                                                                                                                                                                                                                                              | Leucine-rich repeat domain, L domain-like [IPR032675] (1)                                                                                                                                                                           | -                               | -                            | P_trifoliata_00262_mRNA_23.1    |
| GF0047300 | 0                            | 0                         | 0                            | 1 Hypothetical protein (1)                                                          |                                                                                                                                                                                                                                                                                                                                                                              |                                                                                                                                                                                                                                     | -                               | -                            | P_trifoliata_00262_mRNA_17.1    |
| GF0047299 | 0                            | 0                         | 0                            | 1 Hypothetical protein (1)                                                          | ATP binding [GO:000524 molecular_function] (1)                                                                                                                                                                                                                                                                                                                               | ATP-grasp fold, subdomain 2 [IPR013103] (1); Phosphoribosylglycinamide synthetase, ATP-grasp (A) domain [IPR020561] (1)                                                                                                             | -                               | -                            | P_trifoliata_00262_mRNA_16.1    |
| GF0047298 | 0                            | 0                         | 0                            | 1 Hypothetical protein (1)                                                          |                                                                                                                                                                                                                                                                                                                                                                              | Alpha crystallin/Hsp20 domain [IPR02068] (1); HSP20-like chaperone [IPR008978] (1); Small heat shock protein HSP20 [IPR031107] (1)                                                                                                  | -                               | -                            | P_trifoliata_00262_mRNA_13.1    |
| GF0047297 | 0                            | 0                         | 0                            | 1 Hypothetical protein (1)                                                          |                                                                                                                                                                                                                                                                                                                                                                              | Reverse transcriptase zinc-binding domain [IPR026960] (1)                                                                                                                                                                           | -                               | -                            | P_trifoliata_00262_mRNA_12.1    |
| GF0047296 | 0                            | 0                         | 0                            | 1 Hypothetical protein (1)                                                          | nucleic acid binding [GO:0003676 molecular_function] (1)                                                                                                                                                                                                                                                                                                                     | Ribonuclease H-like domain [IPR012337] (1)                                                                                                                                                                                          | -                               | -                            | P_trifoliata_00262_mRNA_11.1    |
| GF0047295 | 0                            | 0                         | 0                            | 1 Hypothetical protein (1)                                                          |                                                                                                                                                                                                                                                                                                                                                                              |                                                                                                                                                                                                                                     | -                               | -                            | P_trifoliata_00262_mRNA_1.1     |
| GF0047294 | 0                            | 0                         | 0                            | 1 Mechanosensitive ion channel family protein (1)                                   |                                                                                                                                                                                                                                                                                                                                                                              |                                                                                                                                                                                                                                     | -                               | -                            | P_trifoliata_00261_mRNA_5.1     |
| GF0047293 | 0                            | 0                         | 0                            | 1 Hypothetical protein (1)                                                          |                                                                                                                                                                                                                                                                                                                                                                              | Expansin, cellulose-binding-like domain [IPR007171] (1); RipA-like double-pair beta-barrel domain [IPR009099] (1); Expansin pollen allergen, DPBB domain [IPR007112] (1)                                                            | -                               | -                            | P_trifoliata_00261_mRNA_41.1    |
| GF0047292 | 0                            | 0                         | 0                            | 1 Receptor-like cytosolic serine/threonine-protein kinase RBK2 (1)                  | protein kinase activity [GO:0004672 molecular_function] (1); protein phosphorylation [GO:0006468 biological_process] (1); ATP binding [GO:0005524 molecular_function] (1)                                                                                                                                                                                                    | Serine/threonine-protein kinase, active site [IPR008271] (1); Serine/threonine/dual specificity protein kinase, catalytic domain [IPR002290] (1); Protein kinase-like domain [IPR011009] (1); Protein kinase domain [IPR000719] (1) | -                               | -                            | P_trifoliata_00261_mRNA_35.1    |
| GF0047291 | 0                            | 0                         | 0                            | 1 Hypothetical protein (1)                                                          |                                                                                                                                                                                                                                                                                                                                                                              |                                                                                                                                                                                                                                     | -                               | -                            | P_trifoliata_00261_mRNA_3.1     |
| GF0047290 | 0                            | 0                         | 0                            | 1 Hypothetical protein (1)                                                          |                                                                                                                                                                                                                                                                                                                                                                              |                                                                                                                                                                                                                                     | -                               | -                            | P_trifoliata_00261_mRNA_21.1    |
| GF0047289 | 0                            | 0                         | 0                            | 1 Hypothetical protein (1)                                                          |                                                                                                                                                                                                                                                                                                                                                                              |                                                                                                                                                                                                                                     | -                               | -                            | P_trifoliata_00261_mRNA_12.1    |
| GF0047288 | 0                            | 0                         | 0                            | 1 Hydroxycinnamoyl-Coenzyme A shikimate/quinic acid hydroxycinnamoyltransferase (1) | transferase activity, transferring acyl groups other than amino-acyl groups [GO:0016747 molecular_function] (1)                                                                                                                                                                                                                                                              | Transferase [IPR003480] (1); Chloroamphenicol acetyltransferase-like domain [IPR023213] (1)                                                                                                                                         | -                               | -                            | P_trifoliata_00261_mRNA_11.1    |
| GF0047287 | 0                            | 0                         | 0                            | 1 Hypothetical protein (1)                                                          |                                                                                                                                                                                                                                                                                                                                                                              |                                                                                                                                                                                                                                     | -                               | -                            | P_trifoliata_00261_mRNA_1.1     |
| GF0047286 | 0                            | 0                         | 0                            | 1 Hypothetical protein (1)                                                          | zinc ion binding [GO:0008270 molecular_function] (1); nucleic acid binding [GO:0003676 molecular_function] (1)                                                                                                                                                                                                                                                               | Zinc finger, CCHC-type [IPR01878] (1)                                                                                                                                                                                               | -                               | -                            | P_trifoliata_00260_mRNA_32.1    |
| GF0047285 | 0                            | 0                         | 0                            | 1 Hypothetical protein (1)                                                          |                                                                                                                                                                                                                                                                                                                                                                              |                                                                                                                                                                                                                                     | -                               | -                            | P_trifoliata_00260_mRNA_30.1    |
| GF0047284 | 0                            | 0                         | 0                            | 1 Protein trichome birefringence-like 31 (1)                                        |                                                                                                                                                                                                                                                                                                                                                                              | P1-4-esterase [IPR029603] (1); trichome birefringence-like family [IPR029962] (1)                                                                                                                                                   | -                               | -                            | P_trifoliata_00260_mRNA_24.1    |
| GF0047283 | 0                            | 0                         | 0                            | 1 Hypothetical protein (1)                                                          |                                                                                                                                                                                                                                                                                                                                                                              |                                                                                                                                                                                                                                     | -                               | -                            | P_trifoliata_00260_mRNA_20.1    |
| GF0047282 | 0                            | 0                         | 0                            | 1 Hypothetical protein (1)                                                          |                                                                                                                                                                                                                                                                                                                                                                              |                                                                                                                                                                                                                                     | -                               | -                            | P_trifoliata_00260_mRNA_2.1     |
| GF0047281 | 0                            | 0                         | 0                            | 1 Hypothetical protein (1)                                                          |                                                                                                                                                                                                                                                                                                                                                                              | Transposase, MuDR, plant [IPR004332] (1)                                                                                                                                                                                            | -                               | -                            | P_trifoliata_00260_mRNA_19.1    |
| GF0047280 | 0                            | 0                         | 0                            | 1 Hypothetical protein (1)                                                          |                                                                                                                                                                                                                                                                                                                                                                              |                                                                                                                                                                                                                                     | -                               | -                            | P_trifoliata_00260_mRNA_17.1    |
| GF0047279 | 0                            | 0                         | 0                            | 1 Hypothetical protein (1)                                                          |                                                                                                                                                                                                                                                                                                                                                                              |                                                                                                                                                                                                                                     | -                               | -                            | P_trifoliata_00260_mRNA_15.1    |
| GF0047278 | 0                            | 0                         | 0                            | 1 Hypothetical protein (1)                                                          |                                                                                                                                                                                                                                                                                                                                                                              |                                                                                                                                                                                                                                     | -                               | -                            | P_trifoliata_00260_mRNA_13.1    |
| GF0047277 | 0                            | 0                         | 0                            | 1 Hypothetical protein (1)                                                          | lipid binding [GO:0008289 molecular_function] (1); lipid transport [GO:0006869 biological_process] (1)                                                                                                                                                                                                                                                                       | Bifunctional inhibitor/plant lipid transfer protein/seed storage helical domain [IPR016140] (1); Plant lipid transfer protein/Par allergen [IPR000528] (1)                                                                          | -                               | -                            | P_trifoliata_00260_mRNA_12.1    |
| GF0047276 | 0                            | 0                         | 0                            | 1 Putative wound induced protein-like (1)                                           |                                                                                                                                                                                                                                                                                                                                                                              | Protein of unknown function wound-induced [IPR022351] (1)                                                                                                                                                                           | -                               | -                            | P_trifoliata_00259_mRNA_9.1     |
| GF0047275 | 0                            | 0                         | 0                            | 1 Hypothetical protein (1)                                                          |                                                                                                                                                                                                                                                                                                                                                                              |                                                                                                                                                                                                                                     | -                               | -                            | P_trifoliata_00259_mRNA_8.1     |
| GF0047274 | 0                            | 0                         | 0                            | 1 Hypothetical protein (1)                                                          | proteolysis [GO:0006508 biological_process] (1); cysteine-type peptidase activity [GO:0008234 molecular_function] (1)                                                                                                                                                                                                                                                        | Ulp1 protease family, C-terminal catalytic domain [IPR003653] (1)                                                                                                                                                                   | -                               | -                            | P_trifoliata_00259_mRNA_44.1    |
| GF0047273 | 0                            | 0                         | 0                            | 1 Hypothetical protein (1)                                                          |                                                                                                                                                                                                                                                                                                                                                                              | Domain of unknown function DUF1985 [IPR015410] (1)                                                                                                                                                                                  | -                               | -                            | P_trifoliata_00259_mRNA_43.1    |
| GF0047272 | 0                            | 0                         | 0                            | 1 Hypothetical protein (1)                                                          | nucleic acid binding [GO:0003676 molecular_function] (1)                                                                                                                                                                                                                                                                                                                     | Ribonuclease H-like domain [IPR012337] (1)                                                                                                                                                                                          | -                               | -                            | P_trifoliata_00259_mRNA_39.1    |
| GF0047271 | 0                            | 0                         | 0                            | 1 Hypothetical protein (1)                                                          |                                                                                                                                                                                                                                                                                                                                                                              |                                                                                                                                                                                                                                     | -                               | -                            | P_trifoliata_00259_mRNA_33.1    |
| GF0047270 | 0                            | 0                         | 0                            | 1 Hypothetical protein (1)                                                          |                                                                                                                                                                                                                                                                                                                                                                              |                                                                                                                                                                                                                                     | -                               | -                            | P_trifoliata_00259_mRNA_30.1    |
| GF0047269 | 0                            | 0                         | 0                            | 1 Hypothetical protein (1)                                                          |                                                                                                                                                                                                                                                                                                                                                                              |                                                                                                                                                                                                                                     | -                               | -                            | P_trifoliata_00259_mRNA_24.1    |
| GF0047268 | 0                            | 0                         | 0                            | 1 Hypothetical protein (1)                                                          |                                                                                                                                                                                                                                                                                                                                                                              |                                                                                                                                                                                                                                     | -                               | -                            | P_trifoliata_00259_mRNA_23.1    |

| ID       | Num. in <i>C. clementiae</i> | Num. in <i>C. canihii</i> | Num. in <i>P. trifoliata</i> | Note                                                           | GO                                                                                                                                                                                                                                                                                                                | InterPro                                                                                                                                                                                                                                                                                                                                                                                                                          | Members in <i>C. clementiae</i> | Members in <i>C. canihii</i> | Members in <i>P. trifoliata</i> |
|----------|------------------------------|---------------------------|------------------------------|----------------------------------------------------------------|-------------------------------------------------------------------------------------------------------------------------------------------------------------------------------------------------------------------------------------------------------------------------------------------------------------------|-----------------------------------------------------------------------------------------------------------------------------------------------------------------------------------------------------------------------------------------------------------------------------------------------------------------------------------------------------------------------------------------------------------------------------------|---------------------------------|------------------------------|---------------------------------|
| GF004267 | 0                            | 0                         | 0                            | 1 Putative wound induced protein-like (1)                      |                                                                                                                                                                                                                                                                                                                   | Protein of unknown function wound-induced [IPRO2251] (1)                                                                                                                                                                                                                                                                                                                                                                          | -                               | -                            | P_trifoliata_00259_mRNA_12,1    |
| GF004266 | 0                            | 0                         | 0                            | 1 Putative wound induced protein-like (1)                      |                                                                                                                                                                                                                                                                                                                   | Protein of unknown function wound-induced [IPRO2251] (1)                                                                                                                                                                                                                                                                                                                                                                          | -                               | -                            | P_trifoliata_00259_mRNA_11,1    |
| GF004265 | 0                            | 0                         | 0                            | 1 Orf105b protein (1)                                          |                                                                                                                                                                                                                                                                                                                   |                                                                                                                                                                                                                                                                                                                                                                                                                                   | -                               | -                            | P_trifoliata_00258_mRNA_9,1     |
| GF004264 | 0                            | 0                         | 0                            | 1 Hypothetical protein (1)                                     |                                                                                                                                                                                                                                                                                                                   |                                                                                                                                                                                                                                                                                                                                                                                                                                   | -                               | -                            | P_trifoliata_00258_mRNA_6,1     |
| GF004263 | 0                            | 0                         | 0                            | 1 Hypothetical protein (1)                                     |                                                                                                                                                                                                                                                                                                                   |                                                                                                                                                                                                                                                                                                                                                                                                                                   | -                               | -                            | P_trifoliata_00258_mRNA_46,1    |
| GF004262 | 0                            | 0                         | 0                            | 1 Hypothetical protein (1)                                     |                                                                                                                                                                                                                                                                                                                   |                                                                                                                                                                                                                                                                                                                                                                                                                                   | -                               | -                            | P_trifoliata_00258_mRNA_45,1    |
| GF004261 | 0                            | 0                         | 0                            | 1 Cytokinin ribotide 5' monophosphate phosphoribohydrolase (1) |                                                                                                                                                                                                                                                                                                                   | LOG family [IPRO31100] (1)                                                                                                                                                                                                                                                                                                                                                                                                        | -                               | -                            | P_trifoliata_00258_mRNA_44,1    |
| GF004260 | 0                            | 0                         | 0                            | 1 Hypothetical protein (1)                                     |                                                                                                                                                                                                                                                                                                                   | Domain of unknown function DUF4283 [IPRO25558] (1); Zinc knuckle CXC2C4H0C4C [IPRO25836] (1)                                                                                                                                                                                                                                                                                                                                      | -                               | -                            | P_trifoliata_00258_mRNA_41,1    |
| GF004259 | 0                            | 0                         | 0                            | 1 Hypothetical protein (1)                                     |                                                                                                                                                                                                                                                                                                                   |                                                                                                                                                                                                                                                                                                                                                                                                                                   | -                               | -                            | P_trifoliata_00258_mRNA_40,1    |
| GF004258 | 0                            | 0                         | 0                            | 1 Hypothetical protein (1)                                     |                                                                                                                                                                                                                                                                                                                   |                                                                                                                                                                                                                                                                                                                                                                                                                                   | -                               | -                            | P_trifoliata_00258_mRNA_39,1    |
| GF004257 | 0                            | 0                         | 0                            | 1 Dynamitin-like protein 6 isoform 2 (1)                       | GTP binding [GO:000525 molecular_function] (1)                                                                                                                                                                                                                                                                    | Pleckstrin homology domain [IPRO1849] (1); Dynamitin central domain [IPRO0375] (1); P-loop containing nucleoside triphosphate hydrolase [IPRO27417] (1); PH domain-like [IPRO11992] (1); Dynamitin superfamily [IPRO2812] (1); Dynamitin-type guanine nucleotide-binding (G) domain [IPRO30381] (1)                                                                                                                               | -                               | -                            | P_trifoliata_00258_mRNA_34,1    |
| GF004256 | 0                            | 0                         | 0                            | 1 Hypothetical protein (1)                                     | GTPase activity [GO:0003924 molecular_function] (1); GTP binding [GO:000525 molecular_function] (1)                                                                                                                                                                                                               | GTPase effector domain [IPRO20850] (1); Dynamitin GTPase effector [IPRO03130] (1); Dynamitin superfamily [IPRO22812] (1)                                                                                                                                                                                                                                                                                                          | -                               | -                            | P_trifoliata_00258_mRNA_33,1    |
| GF004255 | 0                            | 0                         | 0                            | 1 Hypothetical protein (1)                                     |                                                                                                                                                                                                                                                                                                                   | Domain of unknown function DUF4219 [IPRO2514] (1)                                                                                                                                                                                                                                                                                                                                                                                 | -                               | -                            | P_trifoliata_00258_mRNA_30,1    |
| GF004254 | 0                            | 0                         | 0                            | 1 Hypothetical protein (1)                                     |                                                                                                                                                                                                                                                                                                                   |                                                                                                                                                                                                                                                                                                                                                                                                                                   | -                               | -                            | P_trifoliata_00258_mRNA_3,1     |
| GF004253 | 0                            | 0                         | 0                            | 1 Hypothetical protein (1)                                     |                                                                                                                                                                                                                                                                                                                   |                                                                                                                                                                                                                                                                                                                                                                                                                                   | -                               | -                            | P_trifoliata_00258_mRNA_29,1    |
| GF004252 | 0                            | 0                         | 0                            | 1 Putative WRKY transcription factor 19 (1)                    | protein binding [GO:0005515 molecular_function] (1)                                                                                                                                                                                                                                                               | Leucine-rich repeat [IPRO01611] (1); Leucine-rich repeat domain, L domain-like [IPRO32675] (1)                                                                                                                                                                                                                                                                                                                                    | -                               | -                            | P_trifoliata_00258_mRNA_24,1    |
| GF004251 | 0                            | 0                         | 0                            | 1 Hypothetical protein (1)                                     |                                                                                                                                                                                                                                                                                                                   |                                                                                                                                                                                                                                                                                                                                                                                                                                   | -                               | -                            | P_trifoliata_00258_mRNA_23,1    |
| GF004250 | 0                            | 0                         | 0                            | 1 Hypothetical protein (1)                                     |                                                                                                                                                                                                                                                                                                                   |                                                                                                                                                                                                                                                                                                                                                                                                                                   | -                               | -                            | P_trifoliata_00258_mRNA_20,1    |
| GF004249 | 0                            | 0                         | 0                            | 1 Hypothetical protein (1)                                     |                                                                                                                                                                                                                                                                                                                   |                                                                                                                                                                                                                                                                                                                                                                                                                                   | -                               | -                            | P_trifoliata_00258_mRNA_2,1     |
| GF004248 | 0                            | 0                         | 0                            | 1 Hypothetical protein (1)                                     |                                                                                                                                                                                                                                                                                                                   |                                                                                                                                                                                                                                                                                                                                                                                                                                   | -                               | -                            | P_trifoliata_00258_mRNA_19,1    |
| GF004247 | 0                            | 0                         | 0                            | 1 Hypothetical protein (1)                                     |                                                                                                                                                                                                                                                                                                                   |                                                                                                                                                                                                                                                                                                                                                                                                                                   | -                               | -                            | P_trifoliata_00258_mRNA_17,1    |
| GF004246 | 0                            | 0                         | 0                            | 1 Hypothetical protein (1)                                     |                                                                                                                                                                                                                                                                                                                   |                                                                                                                                                                                                                                                                                                                                                                                                                                   | -                               | -                            | P_trifoliata_00258_mRNA_16,1    |
| GF004245 | 0                            | 0                         | 0                            | 1 Hypothetical protein (1)                                     |                                                                                                                                                                                                                                                                                                                   |                                                                                                                                                                                                                                                                                                                                                                                                                                   | -                               | -                            | P_trifoliata_00258_mRNA_15,1    |
| GF004244 | 0                            | 0                         | 0                            | 1 Cytochrome c oxidase subunit 3 (1)                           | aerobic electron transport chain [GO:0019646 biological_process] (1); heme-copper terminal oxidase activity [GO:0015002 molecular_function] (1); membrane [GO:0016020 cellular_component] (1)                                                                                                                     | Cytochrome c oxidase subunit III domain [IPRO0298] (1); Cytochrome c oxidase subunit III [IPRO24791] (1)                                                                                                                                                                                                                                                                                                                          | -                               | -                            | P_trifoliata_00258_mRNA_14,1    |
| GF004243 | 0                            | 0                         | 0                            | 1 Hypothetical protein (1)                                     |                                                                                                                                                                                                                                                                                                                   |                                                                                                                                                                                                                                                                                                                                                                                                                                   | -                               | -                            | P_trifoliata_00258_mRNA_13,1    |
| GF004242 | 0                            | 0                         | 0                            | 1 Hypothetical protein (1)                                     |                                                                                                                                                                                                                                                                                                                   | Reverse transcriptase domain [IPRO09477] (1)                                                                                                                                                                                                                                                                                                                                                                                      | -                               | -                            | P_trifoliata_00257_mRNA_9,1     |
| GF004241 | 0                            | 0                         | 0                            | 1 Hypothetical protein (1)                                     |                                                                                                                                                                                                                                                                                                                   |                                                                                                                                                                                                                                                                                                                                                                                                                                   | -                               | -                            | P_trifoliata_00257_mRNA_7,1     |
| GF004240 | 0                            | 0                         | 0                            | 1 Hypothetical protein (1)                                     | nucleic acid binding [GO:0003676 molecular_function] (1)                                                                                                                                                                                                                                                          | Ribonuclease H-like domain [IPRO12337] (1)                                                                                                                                                                                                                                                                                                                                                                                        | -                               | -                            | P_trifoliata_00257_mRNA_6,1     |
| GF004239 | 0                            | 0                         | 0                            | 1 Hypothetical protein (1)                                     |                                                                                                                                                                                                                                                                                                                   |                                                                                                                                                                                                                                                                                                                                                                                                                                   | -                               | -                            | P_trifoliata_00257_mRNA_27,1    |
| GF004238 | 0                            | 0                         | 0                            | 1 Hypothetical protein (1)                                     |                                                                                                                                                                                                                                                                                                                   |                                                                                                                                                                                                                                                                                                                                                                                                                                   | -                               | -                            | P_trifoliata_00257_mRNA_26,1    |
| GF004237 | 0                            | 0                         | 0                            | 1 Hypothetical protein (1)                                     | zinc ion binding [GO:0008270 molecular_function] (1); nucleic acid binding [GO:0003676 molecular_function] (1)                                                                                                                                                                                                    | Zinc finger, CCHC-type [IPRO01878] (1)                                                                                                                                                                                                                                                                                                                                                                                            | -                               | -                            | P_trifoliata_00257_mRNA_19,1    |
| GF004236 | 0                            | 0                         | 0                            | 1 Hypothetical protein (1)                                     |                                                                                                                                                                                                                                                                                                                   |                                                                                                                                                                                                                                                                                                                                                                                                                                   | -                               | -                            | P_trifoliata_00257_mRNA_17,1    |
| GF004235 | 0                            | 0                         | 0                            | 1 Hypothetical protein (1)                                     |                                                                                                                                                                                                                                                                                                                   |                                                                                                                                                                                                                                                                                                                                                                                                                                   | -                               | -                            | P_trifoliata_00257_mRNA_14,1    |
| GF004234 | 0                            | 0                         | 0                            | 1 Hypothetical protein (1)                                     |                                                                                                                                                                                                                                                                                                                   | DnaJ domain [IPRO01623] (1)                                                                                                                                                                                                                                                                                                                                                                                                       | -                               | -                            | P_trifoliata_00257_mRNA_11,1    |
| GF004233 | 0                            | 0                         | 0                            | 1 Hypothetical protein (1)                                     | O-methyltransferase activity [GO:0008171 molecular_function] (1)                                                                                                                                                                                                                                                  | O-methyltransferase, family 3 [IPRO02935] (1); S-adenosyl-L-methionine-dependent methyltransferase [IPRO29063] (1)                                                                                                                                                                                                                                                                                                                | -                               | -                            | P_trifoliata_00256_mRNA_9,1     |
| GF004232 | 0                            | 0                         | 0                            | 1 Hypothetical protein (1)                                     |                                                                                                                                                                                                                                                                                                                   |                                                                                                                                                                                                                                                                                                                                                                                                                                   | -                               | -                            | P_trifoliata_00256_mRNA_6,1     |
| GF004231 | 0                            | 0                         | 0                            | 1 Hypothetical protein (1)                                     | protein methylation [GO:0006479 biological_process] (1); methyltransferase activity [GO:0008168 molecular_function] (1)                                                                                                                                                                                           | Protein arginine N-methyltransferase [IPRO25799] (1); S-adenosyl-L-methionine-dependent methyltransferase [IPRO29063] (1)                                                                                                                                                                                                                                                                                                         | -                               | -                            | P_trifoliata_00256_mRNA_22,1    |
| GF004230 | 0                            | 0                         | 0                            | 1 Hypothetical protein (1)                                     |                                                                                                                                                                                                                                                                                                                   |                                                                                                                                                                                                                                                                                                                                                                                                                                   | -                               | -                            | P_trifoliata_00256_mRNA_20,1    |
| GF004229 | 0                            | 0                         | 0                            | 1 Hypothetical protein (1)                                     |                                                                                                                                                                                                                                                                                                                   |                                                                                                                                                                                                                                                                                                                                                                                                                                   | -                               | -                            | P_trifoliata_00256_mRNA_19,1    |
| GF004228 | 0                            | 0                         | 0                            | 1 Phospholipase A2 (1)                                         | phospholipase A2 activity [GO:0004623 molecular_function] (1); calcium ion binding [GO:0005509 molecular_function] (1); lipid catabolic process [GO:0016042 biological_process] (1)                                                                                                                               | Phospholipase A2 domain [IPRO16090] (1); Phospholipase A2, histidine active site [IPRO31113] (1); Phospholipase A2 [IPRO0121] (1)                                                                                                                                                                                                                                                                                                 | -                               | -                            | P_trifoliata_00256_mRNA_16,1    |
| GF004227 | 0                            | 0                         | 0                            | 1 Hypothetical protein (1)                                     |                                                                                                                                                                                                                                                                                                                   |                                                                                                                                                                                                                                                                                                                                                                                                                                   | -                               | -                            | P_trifoliata_00256_mRNA_12,1    |
| GF004226 | 0                            | 0                         | 0                            | 1 Hypothetical protein (1)                                     |                                                                                                                                                                                                                                                                                                                   |                                                                                                                                                                                                                                                                                                                                                                                                                                   | -                               | -                            | P_trifoliata_00256_mRNA_10,1    |
| GF004225 | 0                            | 0                         | 0                            | 1 Hypothetical protein (1)                                     |                                                                                                                                                                                                                                                                                                                   |                                                                                                                                                                                                                                                                                                                                                                                                                                   | -                               | -                            | P_trifoliata_00255_mRNA_48,1    |
| GF004224 | 0                            | 0                         | 0                            | 1 Expansin-like B1 (1)                                         | serine-type endopeptidase activity [GO:0004232 molecular_function] (1); proteolysis [GO:0006508 biological_process] (1)                                                                                                                                                                                           | RipA-like double-pai beta-barrel domain [IPRO09009] (1); Expansin-poles allergen, DPB domain [IPRO07112] (1); ATP-dependent Clp protease proteolytic subunit [IPRO01907] (1); CIP/Creonase-like domain [IPRO29045] (1); Expansin, cellulose-binding-like domain [IPRO07117] (1); Clp protease proteolytic subunit/Translocase-enhancing protein TspA [IPRO23562] (1)                                                              | -                               | -                            | P_trifoliata_00255_mRNA_47,1    |
| GF004223 | 0                            | 0                         | 0                            | 1 Hypothetical protein (1)                                     |                                                                                                                                                                                                                                                                                                                   |                                                                                                                                                                                                                                                                                                                                                                                                                                   | -                               | -                            | P_trifoliata_00255_mRNA_46,1    |
| GF004222 | 0                            | 0                         | 0                            | 1 Hypothetical protein (1)                                     | nucleus [GO:0005634 cellular_component] (1); histone lysine methylation [GO:0034968 biological_process] (1); histone-lysine N-methyltransferase activity [GO:0018024 molecular_function] (1); zinc ion binding [GO:0008270 molecular_function] (1)                                                                | Pre-SET zinc-binding sub-group [IPRO03606] (1); Pre-SET domain [IPRO07728] (1)                                                                                                                                                                                                                                                                                                                                                    | -                               | -                            | P_trifoliata_00255_mRNA_44,1    |
| GF004221 | 0                            | 0                         | 0                            | 1 Hypothetical protein (1)                                     |                                                                                                                                                                                                                                                                                                                   |                                                                                                                                                                                                                                                                                                                                                                                                                                   | -                               | -                            | P_trifoliata_00255_mRNA_34,1    |
| GF004220 | 0                            | 0                         | 0                            | 1 Similarity to non-LTR retroelement reverse transcriptase (1) |                                                                                                                                                                                                                                                                                                                   |                                                                                                                                                                                                                                                                                                                                                                                                                                   | -                               | -                            | P_trifoliata_00255_mRNA_30,1    |
| GF004219 | 0                            | 0                         | 0                            | 1 Cytochrome P450 82G1 (1)                                     | oxidoreductase activity, acting on paired donors, with incorporation or reduction of molecular oxygen [GO:0016705 molecular_function] (1); oxidation-reduction process [GO:005514 biological_process] (1); iron ion binding [GO:0005506 molecular_function] (1); heme binding [GO:0020037 molecular_function] (1) | Cytochrome P450 [IPRO01128] (1); Cytochrome P450, E-class, group I [IPRO02401] (1)                                                                                                                                                                                                                                                                                                                                                | -                               | -                            | P_trifoliata_00255_mRNA_28,1    |
| GF004218 | 0                            | 0                         | 0                            | 1 Cytochrome P450 82C4 (1)                                     |                                                                                                                                                                                                                                                                                                                   |                                                                                                                                                                                                                                                                                                                                                                                                                                   | -                               | -                            | P_trifoliata_00255_mRNA_27,1    |
| GF004217 | 0                            | 0                         | 0                            | 1 CB1-interacting serine/threonine-protein kinase 20 (1)       | protein phosphorylation [GO:0006468 biological_process] (1); protein kinase activity [GO:0004672 molecular_function] (1); ATP binding [GO:0005524 molecular_function] (1); signal transduction [GO:0007165 biological_process] (1)                                                                                | Protein kinase, ATP binding site [IPRO17441] (1); Serine/threonine-protein kinase, active site [IPRO08271] (1); Serine/threonine/dual specificity protein kinase, catalytic domain [IPRO02290] (1); Protein kinase-like domain [IPRO11009] (1); NAF/FTSL domain [IPRO18451] (1); Calcium/calmodulin-dependent/calcium-dependent protein kinase [IPRO20636] (1); NAF domain [IPRO04041] (1); Protein kinase domain [IPRO07191] (1) | -                               | -                            | P_trifoliata_00255_mRNA_13,1    |
| GF004216 | 0                            | 0                         | 0                            | 1 High mobility group B protein 7 (1)                          |                                                                                                                                                                                                                                                                                                                   | High mobility group box domain [IPRO09071] (1)                                                                                                                                                                                                                                                                                                                                                                                    | -                               | -                            | P_trifoliata_00255_mRNA_10,2    |
| GF004215 | 0                            | 0                         | 0                            | 1 Hypothetical protein (1)                                     |                                                                                                                                                                                                                                                                                                                   |                                                                                                                                                                                                                                                                                                                                                                                                                                   | -                               | -                            | P_trifoliata_00254_mRNA_7,1     |
| GF004214 | 0                            | 0                         | 0                            | 1 Hypothetical protein (1)                                     |                                                                                                                                                                                                                                                                                                                   |                                                                                                                                                                                                                                                                                                                                                                                                                                   | -                               | -                            | P_trifoliata_00254_mRNA_37,1    |
| GF004213 | 0                            | 0                         | 0                            | 1 Hypothetical protein (1)                                     |                                                                                                                                                                                                                                                                                                                   |                                                                                                                                                                                                                                                                                                                                                                                                                                   | -                               | -                            | P_trifoliata_00254_mRNA_23,1    |
| GF004212 | 0                            | 0                         | 0                            | 1 Hypothetical protein (1)                                     |                                                                                                                                                                                                                                                                                                                   |                                                                                                                                                                                                                                                                                                                                                                                                                                   | -                               | -                            | P_trifoliata_00254_mRNA_22,1    |
| GF004211 | 0                            | 0                         | 0                            | 1 Hypothetical protein (1)                                     |                                                                                                                                                                                                                                                                                                                   |                                                                                                                                                                                                                                                                                                                                                                                                                                   | -                               | -                            | P_trifoliata_00254_mRNA_17,1    |
| GF004210 | 0                            | 0                         | 0                            | 1 Hypothetical protein (1)                                     | zinc ion binding [GO:0008270 molecular_function] (1)                                                                                                                                                                                                                                                              | Zinc finger, SWM-type [IPRO07527] (1); Zinc finger, PMZ-type [IPRO06564] (1)                                                                                                                                                                                                                                                                                                                                                      | -                               | -                            | P_trifoliata_00254_mRNA_13,1    |
| GF004209 | 0                            | 0                         | 0                            | 1 Hypothetical protein (1)                                     | zinc ion binding [GO:0008270 molecular_function] (1); nucleic acid binding [GO:0003676 molecular_function] (1)                                                                                                                                                                                                    | Zinc finger, CCHC-type [IPRO01878] (1)                                                                                                                                                                                                                                                                                                                                                                                            | -                               | -                            | P_trifoliata_00254_mRNA_11,1    |



| ID       | Num. in <i>C. clementiae</i> | Num. in <i>C. canihii</i> | Num. in <i>P. trifoliata</i> | Note                                                         | GO                                                                                                                                                                                                                                                                                                                | InterPro                                                                                                                                                                           | Members in <i>C. clementiae</i> | Members in <i>C. canihii</i> | Members in <i>P. trifoliata</i> |
|----------|------------------------------|---------------------------|------------------------------|--------------------------------------------------------------|-------------------------------------------------------------------------------------------------------------------------------------------------------------------------------------------------------------------------------------------------------------------------------------------------------------------|------------------------------------------------------------------------------------------------------------------------------------------------------------------------------------|---------------------------------|------------------------------|---------------------------------|
| GF004208 | 0                            | 0                         | 0                            | 1 Hypothetical protein (1)                                   |                                                                                                                                                                                                                                                                                                                   |                                                                                                                                                                                    | -                               | -                            | P_trifoliata_00253_mRNA_28.1    |
| GF004207 | 0                            | 0                         | 0                            | 1 Hypothetical protein (1)                                   |                                                                                                                                                                                                                                                                                                                   |                                                                                                                                                                                    | -                               | -                            | P_trifoliata_00253_mRNA_26.1    |
| GF004206 | 0                            | 0                         | 0                            | 1 Hypothetical protein (1)                                   |                                                                                                                                                                                                                                                                                                                   |                                                                                                                                                                                    | -                               | -                            | P_trifoliata_00253_mRNA_25.1    |
| GF004205 | 0                            | 0                         | 0                            | 1 Hypothetical protein (1)                                   |                                                                                                                                                                                                                                                                                                                   |                                                                                                                                                                                    | -                               | -                            | P_trifoliata_00253_mRNA_24.1    |
| GF004204 | 0                            | 0                         | 0                            | 1 Hypothetical protein (1)                                   |                                                                                                                                                                                                                                                                                                                   |                                                                                                                                                                                    | -                               | -                            | P_trifoliata_00253_mRNA_20.1    |
| GF004203 | 0                            | 0                         | 0                            | 1 Cytokinin ribotide 5'-monophosphate phosphorohydrolase (1) |                                                                                                                                                                                                                                                                                                                   | LOG family [IPR031100] (1)                                                                                                                                                         | -                               | -                            | P_trifoliata_00253_mRNA_19.1    |
| GF004202 | 0                            | 0                         | 0                            | 1 Hypothetical protein (1)                                   |                                                                                                                                                                                                                                                                                                                   |                                                                                                                                                                                    | -                               | -                            | P_trifoliata_00253_mRNA_18.1    |
| GF004201 | 0                            | 0                         | 0                            | 1 Hypothetical protein (1)                                   |                                                                                                                                                                                                                                                                                                                   |                                                                                                                                                                                    | -                               | -                            | P_trifoliata_00253_mRNA_11.1    |
| GF004200 | 0                            | 0                         | 0                            | 1 (+)-delta-cadinene synthase isozyme A (1)                  | magnesium ion binding [GO:0000287 molecular_function] (1); lyase activity [GO:0016529 molecular_function] (1); terpene synthase activity [GO:0010333 molecular_function] (1)                                                                                                                                      | Terpenoid cyclases/protein prenyltransferase alpha-alpha teroid [IPR08930] (1); Terpene synthase, metal-binding domain [IPR005630] (1); Isoprenoid synthase domain [IPR008949] (1) | -                               | -                            | P_trifoliata_00252_mRNA_9.1     |
| GF004199 | 0                            | 0                         | 0                            | 1 Hypothetical protein (1)                                   |                                                                                                                                                                                                                                                                                                                   |                                                                                                                                                                                    | -                               | -                            | P_trifoliata_00252_mRNA_7.1     |
| GF004198 | 0                            | 0                         | 0                            | 1 Hypothetical protein (1)                                   |                                                                                                                                                                                                                                                                                                                   |                                                                                                                                                                                    | -                               | -                            | P_trifoliata_00252_mRNA_50.1    |
| GF004197 | 0                            | 0                         | 0                            | 1 Hypothetical protein (1)                                   |                                                                                                                                                                                                                                                                                                                   |                                                                                                                                                                                    | -                               | -                            | P_trifoliata_00252_mRNA_5.1     |
| GF004196 | 0                            | 0                         | 0                            | 1 Hypothetical protein (1)                                   |                                                                                                                                                                                                                                                                                                                   |                                                                                                                                                                                    | -                               | -                            | P_trifoliata_00252_mRNA_48.1    |
| GF004195 | 0                            | 0                         | 0                            | 1 Hypothetical protein (1)                                   | cysteine-type peptidase activity [GO:0008224 molecular_function] (1); proteolysis [GO:0006508 biological_process] (1)                                                                                                                                                                                             | Ulp1 protease family, C-terminal catalytic domain [IPR003653] (1)                                                                                                                  | -                               | -                            | P_trifoliata_00252_mRNA_38.1    |
| GF004194 | 0                            | 0                         | 0                            | 1 Hypothetical protein (1)                                   |                                                                                                                                                                                                                                                                                                                   |                                                                                                                                                                                    | -                               | -                            | P_trifoliata_00252_mRNA_36.1    |
| GF004193 | 0                            | 0                         | 0                            | 1 Hypothetical protein (1)                                   |                                                                                                                                                                                                                                                                                                                   |                                                                                                                                                                                    | -                               | -                            | P_trifoliata_00252_mRNA_33.1    |
| GF004192 | 0                            | 0                         | 0                            | 1 Hypothetical protein (1)                                   |                                                                                                                                                                                                                                                                                                                   | Winged helix-turn-helix DNA-binding domain [IPR011911] (1)                                                                                                                         | -                               | -                            | P_trifoliata_00252_mRNA_31.1    |
| GF004191 | 0                            | 0                         | 0                            | 1 Hypothetical protein (1)                                   |                                                                                                                                                                                                                                                                                                                   |                                                                                                                                                                                    | -                               | -                            | P_trifoliata_00252_mRNA_3.1     |
| GF004190 | 0                            | 0                         | 0                            | 1 Hypothetical protein (1)                                   |                                                                                                                                                                                                                                                                                                                   |                                                                                                                                                                                    | -                               | -                            | P_trifoliata_00252_mRNA_29.1    |
| GF004189 | 0                            | 0                         | 0                            | 1 Hypothetical protein (1)                                   |                                                                                                                                                                                                                                                                                                                   |                                                                                                                                                                                    | -                               | -                            | P_trifoliata_00252_mRNA_28.1    |
| GF004188 | 0                            | 0                         | 0                            | 1 Hypothetical protein (1)                                   |                                                                                                                                                                                                                                                                                                                   |                                                                                                                                                                                    | -                               | -                            | P_trifoliata_00252_mRNA_26.1    |
| GF004187 | 0                            | 0                         | 0                            | 1 Hypothetical protein (1)                                   |                                                                                                                                                                                                                                                                                                                   |                                                                                                                                                                                    | -                               | -                            | P_trifoliata_00252_mRNA_25.1    |
| GF004186 | 0                            | 0                         | 0                            | 1 Transcription factor LTR3 (1)                              |                                                                                                                                                                                                                                                                                                                   |                                                                                                                                                                                    | -                               | -                            | P_trifoliata_00252_mRNA_16.1    |
| GF004185 | 0                            | 0                         | 0                            | 1 (+)-delta-cadinene synthase isozyme A (1)                  | lyase activity [GO:0016529 molecular_function] (1); terpene synthase activity [GO:0010333 molecular_function] (1); metabolic process [GO:0008152 biological_process] (1)                                                                                                                                          | Terpene synthase, N-terminal domain [IPR001906] (1); Terpenoid cyclases/protein prenyltransferase alpha-alpha teroid [IPR08930] (1)                                                | -                               | -                            | P_trifoliata_00252_mRNA_12.1    |
| GF004184 | 0                            | 0                         | 0                            | 1 Sulfotransferase (1)                                       |                                                                                                                                                                                                                                                                                                                   |                                                                                                                                                                                    | -                               | -                            | P_trifoliata_00251_mRNA_39.1    |
| GF004183 | 0                            | 0                         | 0                            | 1 Phospholipase, patatin family (1)                          | lipid metabolic process [GO:0006629 biological_process] (1); metabolic process [GO:0008152 biological_process] (1)                                                                                                                                                                                                | Acyl transferase/1 hydroxylase/lysophospholipase [IPR016035] (1); Patatin/Phospholipase A2-related [IPR003641] (1)                                                                 | -                               | -                            | P_trifoliata_00251_mRNA_36.1    |
| GF004182 | 0                            | 0                         | 0                            | 1 Hypothetical protein (1)                                   | metabolic process [GO:0008152 biological_process] (1); hydrolase activity [GO:0016787 molecular_function] (1)                                                                                                                                                                                                     | Alpha/beta hydrolase fold-1 [IPR013094] (1); Alpha/Beta hydrolase fold [IPR029058] (1)                                                                                             | -                               | -                            | P_trifoliata_00251_mRNA_34.1    |
| GF004181 | 0                            | 0                         | 0                            | 1 Hypothetical protein (1)                                   |                                                                                                                                                                                                                                                                                                                   |                                                                                                                                                                                    | -                               | -                            | P_trifoliata_00251_mRNA_33.1    |
| GF004180 | 0                            | 0                         | 0                            | 1 Hypothetical protein (1)                                   | zinc ion binding [GO:0008270 molecular_function] (1)                                                                                                                                                                                                                                                              | Zinc finger, RING-H2-type [IPR024766] (1); Zinc finger, RING/YVVE/PHD-type [IPR013083] (1)                                                                                         | -                               | -                            | P_trifoliata_00251_mRNA_30.1    |
| GF004179 | 0                            | 0                         | 0                            | 1 Hypothetical protein (1)                                   |                                                                                                                                                                                                                                                                                                                   |                                                                                                                                                                                    | -                               | -                            | P_trifoliata_00251_mRNA_29.1    |
| GF004178 | 0                            | 0                         | 0                            | 1 Hypothetical protein (1)                                   |                                                                                                                                                                                                                                                                                                                   |                                                                                                                                                                                    | -                               | -                            | P_trifoliata_00251_mRNA_28.1    |
| GF004177 | 0                            | 0                         | 0                            | 1 Hypothetical protein (1)                                   |                                                                                                                                                                                                                                                                                                                   |                                                                                                                                                                                    | -                               | -                            | P_trifoliata_00251_mRNA_26.1    |
| GF004176 | 0                            | 0                         | 0                            | 1 Hypothetical protein (1)                                   |                                                                                                                                                                                                                                                                                                                   |                                                                                                                                                                                    | -                               | -                            | P_trifoliata_00251_mRNA_24.1    |
| GF004175 | 0                            | 0                         | 0                            | 1 Hypothetical protein (1)                                   | oxidoreductase activity, acting on paired donors, with incorporation or reduction of molecular oxygen [GO:0016705 molecular_function] (1); oxidation-reduction process [GO:005514 biological_process] (1); iron ion binding [GO:0005506 molecular_function] (1); heme binding [GO:0020037 molecular_function] (1) | Cytochrome P450 [IPR001128] (1)                                                                                                                                                    | -                               | -                            | P_trifoliata_00251_mRNA_1.1     |
| GF004174 | 0                            | 0                         | 0                            | 1 Hypothetical protein (1)                                   | zinc ion binding [GO:0008270 molecular_function] (1); oxidation-reduction process [GO:005514 biological_process] (1); oxidoreductase activity [GO:0016491 molecular_function] (1)                                                                                                                                 | Alcohol dehydrogenase, C-terminal [IPR013149] (1); Alcohol dehydrogenase superfamily, zinc-type [IPR020855] (1); NAD(P)-binding domain [IPR016040] (1)                             | -                               | -                            | P_trifoliata_00250_mRNA_4.1     |
| GF004173 | 0                            | 0                         | 0                            | 1 Hypothetical protein (1)                                   | signal transduction [GO:0007165 biological_process] (1); protein binding [GO:0005515 molecular_function] (1)                                                                                                                                                                                                      | Toll/interleukin-1 receptor homology (TR) domain [IPR001571] (1)                                                                                                                   | -                               | -                            | P_trifoliata_00250_mRNA_34.1    |
| GF004172 | 0                            | 0                         | 0                            | 1 Hypothetical protein (1)                                   | catalytic activity [GO:0003824 molecular_function] (1)                                                                                                                                                                                                                                                            | Cytidine deaminase-like [IPR016193] (1)                                                                                                                                            | -                               | -                            | P_trifoliata_00250_mRNA_33.1    |
| GF004171 | 0                            | 0                         | 0                            | 1 Hypothetical protein (1)                                   |                                                                                                                                                                                                                                                                                                                   |                                                                                                                                                                                    | -                               | -                            | P_trifoliata_00250_mRNA_32.1    |
| GF004170 | 0                            | 0                         | 0                            | 1 Hypothetical protein (1)                                   |                                                                                                                                                                                                                                                                                                                   |                                                                                                                                                                                    | -                               | -                            | P_trifoliata_00250_mRNA_29.1    |
| GF004169 | 0                            | 0                         | 0                            | 1 Hypothetical protein (1)                                   |                                                                                                                                                                                                                                                                                                                   |                                                                                                                                                                                    | -                               | -                            | P_trifoliata_00250_mRNA_27.1    |
| GF004168 | 0                            | 0                         | 0                            | 1 Hypothetical protein (1)                                   |                                                                                                                                                                                                                                                                                                                   |                                                                                                                                                                                    | -                               | -                            | P_trifoliata_00249_mRNA_9.1     |
| GF004167 | 0                            | 0                         | 0                            | 1 Hypothetical protein (1)                                   | nucleotide-excision repair [GO:0006289 biological_process] (1); core TFIIH complex [GO:0000439 cellular_component] (1); ATP-dependent DNA helicase activity [GO:0004003 molecular_function] (1); nucleus [GO:0005634 cellular_component] (1)                                                                      | Transcription factor TFIIH subunit p52/TB2 [IPR04598] (1)                                                                                                                          | -                               | -                            | P_trifoliata_00249_mRNA_8.1     |
| GF004166 | 0                            | 0                         | 0                            | 1 Hypothetical protein (1)                                   | magnesium ion binding [GO:0000287 molecular_function] (1); lyase activity [GO:0016529 molecular_function] (1); terpene synthase activity [GO:0010333 molecular_function] (1)                                                                                                                                      | Terpene synthase, metal-binding domain [IPR08930] (1); Reverse transcriptase, RNA-dependent DNA polymerase [IPR013103] (1); Isoprenoid synthase domain [IPR008949] (1)             | -                               | -                            | P_trifoliata_00249_mRNA_6.1     |
| GF004165 | 0                            | 0                         | 0                            | 1 Hypothetical protein (1)                                   | oxidation-reduction process [GO:005514 biological_process] (1); oxidoreductase activity [GO:0016491 molecular_function] (1)                                                                                                                                                                                       | NAD(P)-dependent oxidoreductase domain [IPR023210] (1); Aldo-keto reductase [IPR020471] (1); Aldo-keto reductase/potassium channel subunit beta [IPR001395] (1)                    | -                               | -                            | P_trifoliata_00249_mRNA_41.1    |
| GF004164 | 0                            | 0                         | 0                            | 1 Hypothetical protein (1)                                   |                                                                                                                                                                                                                                                                                                                   |                                                                                                                                                                                    | -                               | -                            | P_trifoliata_00249_mRNA_40.1    |
| GF004163 | 0                            | 0                         | 0                            | 1 Hypothetical protein (1)                                   |                                                                                                                                                                                                                                                                                                                   |                                                                                                                                                                                    | -                               | -                            | P_trifoliata_00249_mRNA_4.1     |
| GF004162 | 0                            | 0                         | 0                            | 1 Hypothetical protein (1)                                   |                                                                                                                                                                                                                                                                                                                   |                                                                                                                                                                                    | -                               | -                            | P_trifoliata_00249_mRNA_37.1    |
| GF004161 | 0                            | 0                         | 0                            | 1 Hypothetical protein (1)                                   |                                                                                                                                                                                                                                                                                                                   |                                                                                                                                                                                    | -                               | -                            | P_trifoliata_00249_mRNA_35.1    |
| GF004160 | 0                            | 0                         | 0                            | 1 Hypothetical protein (1)                                   |                                                                                                                                                                                                                                                                                                                   |                                                                                                                                                                                    | -                               | -                            | P_trifoliata_00249_mRNA_28.1    |
| GF004159 | 0                            | 0                         | 0                            | 1 General transcription factor IIIH subunit 4 (1)            | core TFIIH complex [GO:0000439 cellular_component] (1); nucleotide-excision repair [GO:0006289 biological_process] (1); ATP-dependent DNA helicase activity [GO:0004003 molecular_function] (1); nucleus [GO:0005634 cellular_component] (1)                                                                      | Transcription factor TFIIH subunit p52/TB2 [IPR04598] (1); Helicase XPB/S12, N-terminal domain [IPR032830] (1)                                                                     | -                               | -                            | P_trifoliata_00249_mRNA_2.1     |
| GF004158 | 0                            | 0                         | 0                            | 1 Hypothetical protein (1)                                   |                                                                                                                                                                                                                                                                                                                   |                                                                                                                                                                                    | -                               | -                            | P_trifoliata_00249_mRNA_13.1    |
| GF004157 | 0                            | 0                         | 0                            | 1 Hypothetical protein (1)                                   |                                                                                                                                                                                                                                                                                                                   | NAD(P)-binding domain [IPR016040] (1)                                                                                                                                              | -                               | -                            | P_trifoliata_00248_mRNA_9.1     |
| GF004156 | 0                            | 0                         | 0                            | 1 Hypothetical protein (1)                                   |                                                                                                                                                                                                                                                                                                                   |                                                                                                                                                                                    | -                               | -                            | P_trifoliata_00248_mRNA_8.1     |
| GF004155 | 0                            | 0                         | 0                            | 1 Hypothetical protein (1)                                   |                                                                                                                                                                                                                                                                                                                   |                                                                                                                                                                                    | -                               | -                            | P_trifoliata_00248_mRNA_42.1    |
| GF004154 | 0                            | 0                         | 0                            | 1 Hypothetical protein (1)                                   |                                                                                                                                                                                                                                                                                                                   |                                                                                                                                                                                    | -                               | -                            | P_trifoliata_00248_mRNA_4.1     |
| GF004153 | 0                            | 0                         | 0                            | 1 Hypothetical protein (1)                                   |                                                                                                                                                                                                                                                                                                                   |                                                                                                                                                                                    | -                               | -                            | P_trifoliata_00248_mRNA_36.1    |
| GF004152 | 0                            | 0                         | 0                            | 1 Hypothetical protein (1)                                   |                                                                                                                                                                                                                                                                                                                   |                                                                                                                                                                                    | -                               | -                            | P_trifoliata_00248_mRNA_35.1    |
| GF004151 | 0                            | 0                         | 0                            | 1 Hypothetical protein (1)                                   |                                                                                                                                                                                                                                                                                                                   |                                                                                                                                                                                    | -                               | -                            | P_trifoliata_00248_mRNA_31.1    |
| GF004150 | 0                            | 0                         | 0                            | 1 Hypothetical protein (1)                                   |                                                                                                                                                                                                                                                                                                                   |                                                                                                                                                                                    | -                               | -                            | P_trifoliata_00248_mRNA_28.1    |
| GF004149 | 0                            | 0                         | 0                            | 1 Hypothetical protein (1)                                   |                                                                                                                                                                                                                                                                                                                   |                                                                                                                                                                                    | -                               | -                            | P_trifoliata_00248_mRNA_25.1    |
| GF004148 | 0                            | 0                         | 0                            | 1 Hypothetical protein (1)                                   | nucleic acid binding [GO:0003676 molecular_function] (1)                                                                                                                                                                                                                                                          | Ribonuclease H-like domain [IPR012337] (1)                                                                                                                                         | -                               | -                            | P_trifoliata_00248_mRNA_24.1    |
| GF004147 | 0                            | 0                         | 0                            | 1 Hypothetical protein (1)                                   |                                                                                                                                                                                                                                                                                                                   |                                                                                                                                                                                    | -                               | -                            | P_trifoliata_00248_mRNA_21.1    |
| GF004146 | 0                            | 0                         | 0                            | 1 Hypothetical protein (1)                                   | ribosome [GO:0005840 cellular_component] (1); translation [GO:0006412 biological_process] (1); intracellular [GO:0005622 cellular_component] (1); structural constituent of ribosome [GO:0003735 molecular_function] (1)                                                                                          | Ribosomal protein L36c [IPR000509] (1)                                                                                                                                             | -                               | -                            | P_trifoliata_00248_mRNA_19.1    |
| GF004145 | 0                            | 0                         | 0                            | 1 Hypothetical protein (1)                                   |                                                                                                                                                                                                                                                                                                                   |                                                                                                                                                                                    | -                               | -                            | P_trifoliata_00248_mRNA_16.1    |
| GF004144 | 0                            | 0                         | 0                            | 1 Putative MATE efflux family protein 5 like (1)             | drug transmembrane transport [GO:0006855 biological_process] (1); membrane [GO:0001602 cellular_component] (1); drug transmembrane transporter activity [GO:0015238 molecular_function] (1); antiporter activity [GO:0015297 molecular_function] (1); transmembrane transport [GO:0055085 biological_process] (1) | Multi antimicrobial extrusion protein [IPR005258] (1)                                                                                                                              | -                               | -                            | P_trifoliata_00248_mRNA_15.1    |
| GF004143 | 0                            | 0                         | 0                            | 1 Ribonuclease H (1)                                         | nucleic acid binding [GO:0003676 molecular_function] (1)                                                                                                                                                                                                                                                          | Ribonuclease H-like domain [IPR012337] (1)                                                                                                                                         | -                               | -                            | P_trifoliata_00248_mRNA_11.1    |
| GF004142 | 0                            | 0                         | 0                            | 1 Hypothetical protein (1)                                   |                                                                                                                                                                                                                                                                                                                   |                                                                                                                                                                                    | -                               | -                            | P_trifoliata_00248_mRNA_10.1    |

| ID        | Num. in <i>C. clementiae</i> | Num. in <i>C. canthii</i> | Num. in <i>P. trifoliatum</i> | Note                                                                        | GO                                                                                                                                                                                                                                                                                                                          | InterPro                                                                                                                                                                                                                                                                   | Members in <i>C. clementiae</i> | Members in <i>C. canthii</i> | Members in <i>P. trifoliatum</i> |
|-----------|------------------------------|---------------------------|-------------------------------|-----------------------------------------------------------------------------|-----------------------------------------------------------------------------------------------------------------------------------------------------------------------------------------------------------------------------------------------------------------------------------------------------------------------------|----------------------------------------------------------------------------------------------------------------------------------------------------------------------------------------------------------------------------------------------------------------------------|---------------------------------|------------------------------|----------------------------------|
| GF0047141 | 0                            | 0                         | 1                             | Potassium transporter (1)                                                   | membrane [GO:0016020]<br>cellular_component (1); potassium ion transmembrane transporter [GO:0071805 biological_process] (1); potassium ion transmembrane transporter activity [GO:0015079 molecular_function] (1)                                                                                                          | Potassium transporter [IPRO03855] (1)                                                                                                                                                                                                                                      | -                               | -                            | P_trifoliata_00248_mRNA_1,1      |
| GF0047140 | 0                            | 0                         | 1                             | Hypothetical protein (1)                                                    |                                                                                                                                                                                                                                                                                                                             |                                                                                                                                                                                                                                                                            | -                               | -                            | P_trifoliata_00247_mRNA_8,1      |
| GF0047139 | 0                            | 0                         | 1                             | Hypothetical protein (1)                                                    |                                                                                                                                                                                                                                                                                                                             |                                                                                                                                                                                                                                                                            | -                               | -                            | P_trifoliata_00247_mRNA_42,1     |
| GF0047138 | 0                            | 0                         | 1                             | Hypothetical protein (1)                                                    |                                                                                                                                                                                                                                                                                                                             |                                                                                                                                                                                                                                                                            | -                               | -                            | P_trifoliata_00247_mRNA_44,1     |
| GF0047137 | 0                            | 0                         | 1                             | Geranylgeranyl diphosphate synthase (1)                                     | isoprenoid biosynthetic process [GO:0008299 biological_process] (1)                                                                                                                                                                                                                                                         | Polyprenyl synthetase-related [IPRO17446] (1); Polyprenyl synthetase [IPRO0902] (1); isoprenoid synthase domain [IPRO08949] (1)                                                                                                                                            | -                               | -                            | P_trifoliata_00247_mRNA_40,1     |
| GF0047136 | 0                            | 0                         | 1                             | Hypothetical protein (1)                                                    |                                                                                                                                                                                                                                                                                                                             |                                                                                                                                                                                                                                                                            | -                               | -                            | P_trifoliata_00247_mRNA_38,1     |
| GF0047135 | 0                            | 0                         | 1                             | Hypothetical protein (1)                                                    |                                                                                                                                                                                                                                                                                                                             |                                                                                                                                                                                                                                                                            | -                               | -                            | P_trifoliata_00247_mRNA_35,1     |
| GF0047134 | 0                            | 0                         | 1                             | Hypothetical protein (1)                                                    | ATP binding [GO:0005524 molecular_function] (1); microtubule-based movement [GO:0007018 biological_process] (1); microtubule motor activity [GO:0005777 molecular_function] (1); microtubule binding [GO:0008017 molecular_function] (1)                                                                                    | Kinesin-like protein [IPRO27640] (1); Kinesin motor domain [IPRO01752] (1)                                                                                                                                                                                                 | -                               | -                            | P_trifoliata_00247_mRNA_34,1     |
| GF0047133 | 0                            | 0                         | 1                             | Calpain clp-1 (1)                                                           |                                                                                                                                                                                                                                                                                                                             | PC-Esterase [IPRO26057] (1); Trichome birefringence-like family [IPRO29962] (1); PMRS N-terminal domain [IPRO25846] (1)                                                                                                                                                    | -                               | -                            | P_trifoliata_00247_mRNA_3,1      |
| GF0047132 | 0                            | 0                         | 1                             | Hypothetical protein (1)                                                    |                                                                                                                                                                                                                                                                                                                             |                                                                                                                                                                                                                                                                            | -                               | -                            | P_trifoliata_00247_mRNA_23,1     |
| GF0047131 | 0                            | 0                         | 1                             | Retransposon protein, putative, Ty1-copia subclass (1)                      | attachment of GTP anchor to protein [GO:0016255 biological_process] (1); proteolysis [GO:0006508 biological_process] (1); peptidase activity [GO:0005223 molecular_function] (1); GPI-anchor transamidase complex [GO:0042765 cellular_component] (1); GPI-anchor transamidase activity [GO:0003923 molecular_function] (1) | GAG-pro-integrase domain [IPRO25724] (1)                                                                                                                                                                                                                                   | -                               | -                            | P_trifoliata_00247_mRNA_20,1     |
| GF0047130 | 0                            | 0                         | 1                             | ATIG08750 protein (1)                                                       |                                                                                                                                                                                                                                                                                                                             | GPI-anchor transamidase [IPRO28361] (1); Peptidase C13, legumain [IPRO01096] (1)                                                                                                                                                                                           | -                               | -                            | P_trifoliata_00247_mRNA_18,1     |
| GF0047129 | 0                            | 0                         | 1                             | Hypothetical protein (1)                                                    |                                                                                                                                                                                                                                                                                                                             |                                                                                                                                                                                                                                                                            | -                               | -                            | P_trifoliata_00247_mRNA_16,1     |
| GF0047128 | 0                            | 0                         | 1                             | Hypothetical protein (1)                                                    |                                                                                                                                                                                                                                                                                                                             | Mallectin [IPRO21720] (1)                                                                                                                                                                                                                                                  | -                               | -                            | P_trifoliata_00247_mRNA_11,1     |
| GF0047127 | 0                            | 0                         | 1                             | Hypothetical protein (1)                                                    |                                                                                                                                                                                                                                                                                                                             |                                                                                                                                                                                                                                                                            | -                               | -                            | P_trifoliata_00247_mRNA_10,1     |
| GF0047126 | 0                            | 0                         | 1                             | Leucine-rich repeat family protein (protein kinase family protein-like) (1) | protein binding [GO:0005515 molecular_function] (1)                                                                                                                                                                                                                                                                         | Leucine-rich repeat [IPRO01611] (1); Mallectin [IPRO21720] (1); Concanavalin A-like lectin glycanase domain [IPRO13320] (1); PC-Esterase [IPRO26057] (1); Leucine-rich repeat domain, L domain-like [IPRO32675] (1)                                                        | -                               | -                            | P_trifoliata_00247_mRNA_1,1      |
| GF0047125 | 0                            | 0                         | 1                             | Hypothetical protein (1)                                                    |                                                                                                                                                                                                                                                                                                                             |                                                                                                                                                                                                                                                                            | -                               | -                            | P_trifoliata_00246_mRNA_9,1      |
| GF0047124 | 0                            | 0                         | 1                             | Hypothetical protein (1)                                                    |                                                                                                                                                                                                                                                                                                                             |                                                                                                                                                                                                                                                                            | -                               | -                            | P_trifoliata_00246_mRNA_8,1      |
| GF0047123 | 0                            | 0                         | 1                             | Hypothetical protein (1)                                                    |                                                                                                                                                                                                                                                                                                                             |                                                                                                                                                                                                                                                                            | -                               | -                            | P_trifoliata_00246_mRNA_7,1      |
| GF0047122 | 0                            | 0                         | 1                             | Hypothetical protein (1)                                                    |                                                                                                                                                                                                                                                                                                                             |                                                                                                                                                                                                                                                                            | -                               | -                            | P_trifoliata_00246_mRNA_5,1      |
| GF0047121 | 0                            | 0                         | 1                             | Hypothetical protein (1)                                                    |                                                                                                                                                                                                                                                                                                                             | Reverse transcriptase domain [IPRO00477] (1)                                                                                                                                                                                                                               | -                               | -                            | P_trifoliata_00246_mRNA_4,1      |
| GF0047120 | 0                            | 0                         | 1                             | Protein AG1 (1)                                                             | GTP binding [GO:0005525 molecular_function] (1)                                                                                                                                                                                                                                                                             | P-loop containing nucleoside triphosphate hydrolase [IPRO27417] (1); AG1-type guanine nucleotide-binding (G) domain [IPRO06703] (1)                                                                                                                                        | -                               | -                            | P_trifoliata_00246_mRNA_34,1     |
| GF0047119 | 0                            | 0                         | 1                             | Hypothetical protein (1)                                                    |                                                                                                                                                                                                                                                                                                                             |                                                                                                                                                                                                                                                                            | -                               | -                            | P_trifoliata_00246_mRNA_33,1     |
| GF0047118 | 0                            | 0                         | 1                             | Protein AG1 (1)                                                             | GTP binding [GO:0005525 molecular_function] (1)                                                                                                                                                                                                                                                                             | AG1-type guanine nucleotide-binding (G) domain [IPRO06703] (1); P-loop containing nucleoside triphosphate hydrolase [IPRO27417] (1)                                                                                                                                        | -                               | -                            | P_trifoliata_00246_mRNA_30,1     |
| GF0047117 | 0                            | 0                         | 1                             | 12-oxophytoanolate reductase 2 (1)                                          | oxidoreductase activity [GO:0016491 molecular_function] (1); oxidation-reduction process [GO:0055114 biological_process] (1); FMN binding [GO:0010181 molecular_function] (1); catalytic activity [GO:0003824 molecular_function] (1)                                                                                       | NADH-flavin oxidoreductase/NADH oxidase, N-terminal [IPRO01155] (1); Aldolase-type TIM barrel [IPRO13785] (1)                                                                                                                                                              | -                               | -                            | P_trifoliata_00246_mRNA_26,1     |
| GF0047116 | 0                            | 0                         | 1                             | Hypothetical protein (1)                                                    | protein binding [GO:0005515 molecular_function] (1); signal transduction [GO:0070165 biological_process] (1)                                                                                                                                                                                                                | Leucine-rich repeat [IPRO01611] (1); Leucine-rich repeat domain, L domain-like [IPRO32675] (1); Leucine-rich repeat, typical subtype [IPRO03591] (1); Toll-interleukin 1 receptor homology (TIR) domain [IPRO0157] (1); Domain of unknown function DUF1985 [IPRO15410] (1) | -                               | -                            | P_trifoliata_00246_mRNA_24,1     |
| GF0047115 | 0                            | 0                         | 1                             | Hypothetical protein (1)                                                    |                                                                                                                                                                                                                                                                                                                             |                                                                                                                                                                                                                                                                            | -                               | -                            | P_trifoliata_00246_mRNA_22,1     |
| GF0047114 | 0                            | 0                         | 1                             | Hypothetical protein (1)                                                    |                                                                                                                                                                                                                                                                                                                             |                                                                                                                                                                                                                                                                            | -                               | -                            | P_trifoliata_00246_mRNA_20,1     |
| GF0047113 | 0                            | 0                         | 1                             | Hypothetical protein (1)                                                    |                                                                                                                                                                                                                                                                                                                             |                                                                                                                                                                                                                                                                            | -                               | -                            | P_trifoliata_00246_mRNA_19,1     |
| GF0047112 | 0                            | 0                         | 1                             | Hypothetical protein (1)                                                    |                                                                                                                                                                                                                                                                                                                             |                                                                                                                                                                                                                                                                            | -                               | -                            | P_trifoliata_00246_mRNA_18,1     |
| GF0047111 | 0                            | 0                         | 1                             | Hypothetical protein (1)                                                    |                                                                                                                                                                                                                                                                                                                             |                                                                                                                                                                                                                                                                            | -                               | -                            | P_trifoliata_00246_mRNA_17,1     |
| GF0047110 | 0                            | 0                         | 1                             | Hypothetical protein (1)                                                    |                                                                                                                                                                                                                                                                                                                             |                                                                                                                                                                                                                                                                            | -                               | -                            | P_trifoliata_00246_mRNA_15,1     |
| GF0047109 | 0                            | 0                         | 1                             | Hypothetical protein (1)                                                    |                                                                                                                                                                                                                                                                                                                             |                                                                                                                                                                                                                                                                            | -                               | -                            | P_trifoliata_00246_mRNA_13,1     |
| GF0047108 | 0                            | 0                         | 1                             | Hypothetical protein (1)                                                    |                                                                                                                                                                                                                                                                                                                             | Domain of unknown function DUF1985 [IPRO15410] (1)                                                                                                                                                                                                                         | -                               | -                            | P_trifoliata_00246_mRNA_12,1     |
| GF0047107 | 0                            | 0                         | 1                             | Peroxidase 4 (1)                                                            | response to oxidative stress [GO:0006979 biological_process] (1); heme binding [GO:0020037 molecular_function] (1); oxidation-reduction process [GO:0055114 biological_process] (1); peroxidase activity [GO:0004601 molecular_function] (1)                                                                                | Plant peroxidase [IPRO00823] (1); Peroxidases heme-ligand binding site [IPRO19793] (1); Haem peroxidase, plant/fungal/bacterial [IPRO2016] (1); Haem peroxidase [IPRO10255] (1)                                                                                            | -                               | -                            | P_trifoliata_00246_mRNA_11,1     |
| GF0047106 | 0                            | 0                         | 1                             | Hypothetical protein (1)                                                    |                                                                                                                                                                                                                                                                                                                             |                                                                                                                                                                                                                                                                            | -                               | -                            | P_trifoliata_00245_mRNA_5,1      |
| GF0047105 | 0                            | 0                         | 1                             | Hypothetical protein (1)                                                    |                                                                                                                                                                                                                                                                                                                             | Pentatricopeptide repeat [IPRO02885] (1)                                                                                                                                                                                                                                   | -                               | -                            | P_trifoliata_00245_mRNA_40,1     |
| GF0047104 | 0                            | 0                         | 1                             | Hypothetical protein (1)                                                    |                                                                                                                                                                                                                                                                                                                             |                                                                                                                                                                                                                                                                            | -                               | -                            | P_trifoliata_00245_mRNA_37,1     |
| GF0047103 | 0                            | 0                         | 1                             | Hypothetical protein (1)                                                    | FAD binding [GO:0071949 molecular_function] (1); oxidoreductase activity [GO:0016491 molecular_function] (1); oxidation-reduction process [GO:0055114 biological_process] (1)                                                                                                                                               | FAD-binding domain [IPRO02938] (1); FAD/NAD(P)-binding domain [IPRO23753] (1)                                                                                                                                                                                              | -                               | -                            | P_trifoliata_00245_mRNA_34,1     |
| GF0047102 | 0                            | 0                         | 1                             | Hypothetical protein (1)                                                    |                                                                                                                                                                                                                                                                                                                             | Gag polyprotein of LTR copia-type [IPRO29472] (1)                                                                                                                                                                                                                          | -                               | -                            | P_trifoliata_00245_mRNA_32,1     |
| GF0047101 | 0                            | 0                         | 1                             | Hypothetical protein (1)                                                    |                                                                                                                                                                                                                                                                                                                             |                                                                                                                                                                                                                                                                            | -                               | -                            | P_trifoliata_00245_mRNA_28,1     |
| GF0047100 | 0                            | 0                         | 1                             | Hypothetical protein (1)                                                    |                                                                                                                                                                                                                                                                                                                             |                                                                                                                                                                                                                                                                            | -                               | -                            | P_trifoliata_00245_mRNA_24,1     |
| GF0047099 | 0                            | 0                         | 1                             | Hypothetical protein (1)                                                    |                                                                                                                                                                                                                                                                                                                             | S-adenosyl-L-methionine-dependent methyltransferase [IPRO29063] (1)                                                                                                                                                                                                        | -                               | -                            | P_trifoliata_00245_mRNA_23,1     |
| GF0047098 | 0                            | 0                         | 1                             | Hypothetical protein (1)                                                    |                                                                                                                                                                                                                                                                                                                             |                                                                                                                                                                                                                                                                            | -                               | -                            | P_trifoliata_00245_mRNA_22,1     |
| GF0047097 | 0                            | 0                         | 1                             | Hypothetical protein (1)                                                    | transferase activity, transferring acyl groups other than amino-acyl groups [GO:0016747 molecular_function] (1)                                                                                                                                                                                                             | Chloramphenicol acetyltransferase-like domain [IPRO23213] (1); Transferase [IPRO03480] (1)                                                                                                                                                                                 | -                               | -                            | P_trifoliata_00245_mRNA_21,1     |
| GF0047096 | 0                            | 0                         | 1                             | Saharalindol 7-O-acetyltransferase (1)                                      | transferase activity, transferring acyl groups other than amino-acyl groups [GO:0016747 molecular_function] (1)                                                                                                                                                                                                             | Chloramphenicol acetyltransferase-like domain [IPRO23213] (1); Transferase [IPRO03480] (1)                                                                                                                                                                                 | -                               | -                            | P_trifoliata_00245_mRNA_20,1     |
| GF0047095 | 0                            | 0                         | 1                             | Hypothetical protein (1)                                                    | pectinesterase activity [GO:0030599 molecular_function] (1); cell wall [GO:0005618 cellular_component] (1); cell wall modification [GO:0042545 biological_process] (1)                                                                                                                                                      | Pectinesterase, catalytic [IPRO00070] (1); Pectin lyase fold [IPRO12334] (1); Pectin lyase fold/variance factor [IPRO11050] (1)                                                                                                                                            | -                               | -                            | P_trifoliata_00245_mRNA_10,1     |
| GF0047094 | 0                            | 0                         | 1                             | Hypothetical protein (1)                                                    |                                                                                                                                                                                                                                                                                                                             |                                                                                                                                                                                                                                                                            | -                               | -                            | P_trifoliata_00244_mRNA_9,1      |
| GF0047093 | 0                            | 0                         | 1                             | Hypothetical protein (1)                                                    |                                                                                                                                                                                                                                                                                                                             | Leucine-rich repeat domain, L domain-like [IPRO32675] (1)                                                                                                                                                                                                                  | -                               | -                            | P_trifoliata_00244_mRNA_7,1      |
| GF0047092 | 0                            | 0                         | 1                             | Hypothetical protein (1)                                                    |                                                                                                                                                                                                                                                                                                                             |                                                                                                                                                                                                                                                                            | -                               | -                            | P_trifoliata_00244_mRNA_6,1      |
| GF0047091 | 0                            | 0                         | 1                             | Hypothetical protein (1)                                                    |                                                                                                                                                                                                                                                                                                                             |                                                                                                                                                                                                                                                                            | -                               | -                            | P_trifoliata_00244_mRNA_50,1     |
| GF0047090 | 0                            | 0                         | 1                             | Hypothetical protein (1)                                                    |                                                                                                                                                                                                                                                                                                                             |                                                                                                                                                                                                                                                                            | -                               | -                            | P_trifoliata_00244_mRNA_49,1     |
| GF0047089 | 0                            | 0                         | 1                             | Hypothetical protein (1)                                                    |                                                                                                                                                                                                                                                                                                                             |                                                                                                                                                                                                                                                                            | -                               | -                            | P_trifoliata_00244_mRNA_45,1     |
| GF0047088 | 0                            | 0                         | 1                             | Hypothetical protein (1)                                                    |                                                                                                                                                                                                                                                                                                                             | Plant disease resistance response protein [IPRO04265] (1)                                                                                                                                                                                                                  | -                               | -                            | P_trifoliata_00244_mRNA_44,1     |
| GF0047087 | 0                            | 0                         | 1                             | Disease resistance-responsive family protein (1)                            |                                                                                                                                                                                                                                                                                                                             | Plant disease resistance response protein [IPRO04265] (1)                                                                                                                                                                                                                  | -                               | -                            | P_trifoliata_00244_mRNA_42,1     |
| GF0047086 | 0                            | 0                         | 1                             | Hypothetical protein (1)                                                    | nucleic acid binding [GO:0003676 molecular_function] (1); zinc ion binding [GO:0008270 molecular_function] (1)                                                                                                                                                                                                              | Domain of unknown function DUF4283 [IPRO25558] (1); Zinc finger, CCHC-type [IPRO01878] (1)                                                                                                                                                                                 | -                               | -                            | P_trifoliata_00244_mRNA_38,1     |
| GF0047085 | 0                            | 0                         | 1                             | Reverse transcriptase, related (1)                                          |                                                                                                                                                                                                                                                                                                                             | Endonuclease/complex/phosphatase [IPRO06135] (1)                                                                                                                                                                                                                           | -                               | -                            | P_trifoliata_00244_mRNA_37,1     |
| GF0047084 | 0                            | 0                         | 1                             | Hypothetical protein (1)                                                    |                                                                                                                                                                                                                                                                                                                             |                                                                                                                                                                                                                                                                            | -                               | -                            | P_trifoliata_00244_mRNA_36,1     |
| GF0047083 | 0                            | 0                         | 1                             | Hypothetical protein (1)                                                    |                                                                                                                                                                                                                                                                                                                             |                                                                                                                                                                                                                                                                            | -                               | -                            | P_trifoliata_00244_mRNA_28,1     |
| GF0047082 | 0                            | 0                         | 1                             | Hypothetical protein (1)                                                    |                                                                                                                                                                                                                                                                                                                             |                                                                                                                                                                                                                                                                            | -                               | -                            | P_trifoliata_00244_mRNA_24,1     |
| GF0047081 | 0                            | 0                         | 1                             | Hypothetical protein (1)                                                    |                                                                                                                                                                                                                                                                                                                             |                                                                                                                                                                                                                                                                            | -                               | -                            | P_trifoliata_00244_mRNA_19,1     |
| GF0047080 | 0                            | 0                         | 1                             | Disease resistance protein (1)                                              | ADP binding [GO:0043531 molecular_function] (1)                                                                                                                                                                                                                                                                             | P-loop containing nucleoside triphosphate hydrolase [IPRO27417] (1); NB-ARC [IPRO02182] (1)                                                                                                                                                                                | -                               | -                            | P_trifoliata_00244_mRNA_16,1     |
| GF0047079 | 0                            | 0                         | 1                             | Hypothetical protein (1)                                                    |                                                                                                                                                                                                                                                                                                                             |                                                                                                                                                                                                                                                                            | -                               | -                            | P_trifoliata_00244_mRNA_15,1     |
| GF0047078 | 0                            | 0                         | 1                             | Hypothetical protein (1)                                                    |                                                                                                                                                                                                                                                                                                                             |                                                                                                                                                                                                                                                                            | -                               | -                            | P_trifoliata_00243_mRNA_31,1     |
| GF0047077 | 0                            | 0                         | 1                             | Hypothetical protein (1)                                                    |                                                                                                                                                                                                                                                                                                                             |                                                                                                                                                                                                                                                                            | -                               | -                            | P_trifoliata_00243_mRNA_28,1     |

| ID        | Num. in <i>C. clementiae</i> | Num. in <i>C. canihii</i> | Num. in <i>P. trifoliata</i> | Note                                                       | GO                                                                                                                                                                                                                                                                                                                                                | InterPro                                                                                                                                                                                                                                                                                                                 | Members in <i>C. clementiae</i> | Members in <i>C. canihii</i> | Members in <i>P. trifoliata</i> |
|-----------|------------------------------|---------------------------|------------------------------|------------------------------------------------------------|---------------------------------------------------------------------------------------------------------------------------------------------------------------------------------------------------------------------------------------------------------------------------------------------------------------------------------------------------|--------------------------------------------------------------------------------------------------------------------------------------------------------------------------------------------------------------------------------------------------------------------------------------------------------------------------|---------------------------------|------------------------------|---------------------------------|
| GF0047076 | 0                            | 0                         | 1                            | Hypothetical protein (1)                                   | regulation of transcription, DNA-templated [GO:0006355 biological_process] (1)                                                                                                                                                                                                                                                                    | FHY3/FAR1 family [IPR031052] (1)                                                                                                                                                                                                                                                                                         | -                               | -                            | P_trifoliata_00243_mRNA_25.1    |
| GF0047075 | 0                            | 0                         | 1                            | Hypothetical protein (1)                                   | -                                                                                                                                                                                                                                                                                                                                                 | -                                                                                                                                                                                                                                                                                                                        | -                               | -                            | P_trifoliata_00243_mRNA_15.1    |
| GF0047074 | 0                            | 0                         | 1                            | Hypothetical protein (1)                                   | -                                                                                                                                                                                                                                                                                                                                                 | -                                                                                                                                                                                                                                                                                                                        | -                               | -                            | P_trifoliata_00243_mRNA_11.1    |
| GF0047073 | 0                            | 0                         | 1                            | Hypothetical protein (1)                                   | -                                                                                                                                                                                                                                                                                                                                                 | Protein of unknown function DUF1191 [IPR010605] (1)                                                                                                                                                                                                                                                                      | -                               | -                            | P_trifoliata_00242_mRNA_8.1     |
| GF0047072 | 0                            | 0                         | 1                            | Hypothetical protein (1)                                   | -                                                                                                                                                                                                                                                                                                                                                 | -                                                                                                                                                                                                                                                                                                                        | -                               | -                            | P_trifoliata_00242_mRNA_58.1    |
| GF0047071 | 0                            | 0                         | 1                            | Hypothetical protein (1)                                   | -                                                                                                                                                                                                                                                                                                                                                 | -                                                                                                                                                                                                                                                                                                                        | -                               | -                            | P_trifoliata_00242_mRNA_57.1    |
| GF0047070 | 0                            | 0                         | 1                            | Hypothetical protein (1)                                   | microtubule-based process [GO:0007017 biological_process] (1); microtubule [GO:005574 cellular_component] (1)                                                                                                                                                                                                                                     | Tubulin [IPR000217] (1); Tubulin FtsZ, C-terminal [IPR008280] (1); Tubulin, C-terminal [IPR023123] (1)                                                                                                                                                                                                                   | -                               | -                            | P_trifoliata_00242_mRNA_31.1    |
| GF0047069 | 0                            | 0                         | 1                            | Hypothetical protein (1)                                   | -                                                                                                                                                                                                                                                                                                                                                 | Protein of unknown function DUF594 [IPR007658] (1)                                                                                                                                                                                                                                                                       | -                               | -                            | P_trifoliata_00241_mRNA_6.1     |
| GF0047068 | 0                            | 0                         | 1                            | Hypothetical protein (1)                                   | -                                                                                                                                                                                                                                                                                                                                                 | -                                                                                                                                                                                                                                                                                                                        | -                               | -                            | P_trifoliata_00241_mRNA_41.1    |
| GF0047067 | 0                            | 0                         | 1                            | Hypothetical protein (1)                                   | -                                                                                                                                                                                                                                                                                                                                                 | -                                                                                                                                                                                                                                                                                                                        | -                               | -                            | P_trifoliata_00241_mRNA_40.1    |
| GF0047066 | 0                            | 0                         | 1                            | Hypothetical protein (1)                                   | -                                                                                                                                                                                                                                                                                                                                                 | Domain of unknown function DUF4220 [IPR05315] (1)                                                                                                                                                                                                                                                                        | -                               | -                            | P_trifoliata_00241_mRNA_4.1     |
| GF0047065 | 0                            | 0                         | 1                            | Hypothetical protein (1)                                   | -                                                                                                                                                                                                                                                                                                                                                 | -                                                                                                                                                                                                                                                                                                                        | -                               | -                            | P_trifoliata_00241_mRNA_37.1    |
| GF0047064 | 0                            | 0                         | 1                            | Hypothetical protein (1)                                   | -                                                                                                                                                                                                                                                                                                                                                 | -                                                                                                                                                                                                                                                                                                                        | -                               | -                            | P_trifoliata_00241_mRNA_36.1    |
| GF0047063 | 0                            | 0                         | 1                            | Hypothetical protein (1)                                   | -                                                                                                                                                                                                                                                                                                                                                 | -                                                                                                                                                                                                                                                                                                                        | -                               | -                            | P_trifoliata_00241_mRNA_34.1    |
| GF0047062 | 0                            | 0                         | 1                            | Hypothetical protein (1)                                   | -                                                                                                                                                                                                                                                                                                                                                 | -                                                                                                                                                                                                                                                                                                                        | -                               | -                            | P_trifoliata_00241_mRNA_33.1    |
| GF0047061 | 0                            | 0                         | 1                            | Hypothetical protein (1)                                   | metabolic process [GO:0008152 biological_process] (1); membrane [GO:0016020 cellular_component] (1); fatty acid biosynthetic process [GO:0006633 biological_process] (1); transferase activity, transferring acyl groups other than amino-acyl groups [GO:0016747 molecular_function] (1); catalytic activity [GO:0003824 molecular_function] (1) | Thiolase-like [IPR016039] (1); Very-long-chain 3-oxoacyl-CoA synthase [IPR012392] (1); FAE1/Type III polyketide synthase-like protein [IPR013601] (1)                                                                                                                                                                    | -                               | -                            | P_trifoliata_00241_mRNA_32.1    |
| GF0047060 | 0                            | 0                         | 1                            | Putative non-LTR retrotransposon reverse transcriptase (1) | nucleic acid binding [GO:0003676 molecular_function] (1)                                                                                                                                                                                                                                                                                          | Ribonuclease H-like domain [IPR012337] (1); Gag-polyprotein of LTR copia-type [IPR029472] (1)                                                                                                                                                                                                                            | -                               | -                            | P_trifoliata_00241_mRNA_31.1    |
| GF0047059 | 0                            | 0                         | 1                            | Metal tolerance protein 9 (1)                              | integral component of membrane [GO:0016021 cellular_component] (1); cation transmembrane transporter activity [GO:0008324 molecular_function] (1); cation transport [GO:0006812 biological_process] (1); transmembrane transport [GO:0055985 biological_process] (1)                                                                              | Cation efflux protein, cytoplasmic domain [IPR027470] (1); Cation efflux protein [IPR002524] (1); Cation efflux protein transmembrane domain [IPR027469] (1)                                                                                                                                                             | -                               | -                            | P_trifoliata_00241_mRNA_23.1    |
| GF0047058 | 0                            | 0                         | 1                            | Hypothetical protein (1)                                   | cell redox homeostasis [GO:0045454 biological_process] (1); glycerol ether metabolic process [GO:0006662 biological_process] (1); protein disulfide oxidoreductase activity [GO:0015035 molecular_function] (1)                                                                                                                                   | Thioredoxin domain [IPR013766] (1); Thioredoxin [IPR005746] (1); Thioredoxin-like fold [IPR012336] (1)                                                                                                                                                                                                                   | -                               | -                            | P_trifoliata_00241_mRNA_15.1    |
| GF0047057 | 0                            | 0                         | 1                            | Hypothetical protein (1)                                   | -                                                                                                                                                                                                                                                                                                                                                 | -                                                                                                                                                                                                                                                                                                                        | -                               | -                            | P_trifoliata_00241_mRNA_12.1    |
| GF0047056 | 0                            | 0                         | 1                            | Hypothetical protein (1)                                   | -                                                                                                                                                                                                                                                                                                                                                 | -                                                                                                                                                                                                                                                                                                                        | -                               | -                            | P_trifoliata_00241_mRNA_11.1    |
| GF0047055 | 0                            | 0                         | 1                            | Disease resistance protein (TR-NBS-LRR class) (1)          | signal transduction [GO:0007165 biological_process] (1); protein binding [GO:0005515 molecular_function] (1)                                                                                                                                                                                                                                      | Toll/interleukin-1 receptor homology (TR) domain [IPR001571] (1)                                                                                                                                                                                                                                                         | -                               | -                            | P_trifoliata_00240_mRNA_8.1     |
| GF0047054 | 0                            | 0                         | 1                            | Hypothetical protein (1)                                   | -                                                                                                                                                                                                                                                                                                                                                 | -                                                                                                                                                                                                                                                                                                                        | -                               | -                            | P_trifoliata_00240_mRNA_7.1     |
| GF0047053 | 0                            | 0                         | 1                            | Hypothetical protein (1)                                   | -                                                                                                                                                                                                                                                                                                                                                 | -                                                                                                                                                                                                                                                                                                                        | -                               | -                            | P_trifoliata_00240_mRNA_6.1     |
| GF0047052 | 0                            | 0                         | 1                            | Hypothetical protein (1)                                   | -                                                                                                                                                                                                                                                                                                                                                 | -                                                                                                                                                                                                                                                                                                                        | -                               | -                            | P_trifoliata_00240_mRNA_32.1    |
| GF0047051 | 0                            | 0                         | 1                            | Hypothetical protein (1)                                   | -                                                                                                                                                                                                                                                                                                                                                 | -                                                                                                                                                                                                                                                                                                                        | -                               | -                            | P_trifoliata_00240_mRNA_30.1    |
| GF0047050 | 0                            | 0                         | 1                            | Toll-interleukin-resistance (TIR) domain protein (1)       | protein binding [GO:0005515 molecular_function] (1); ADP binding [GO:0043531 molecular_function] (1); signal transduction [GO:0007165 biological_process] (1)                                                                                                                                                                                     | Toll/interleukin-1 receptor homology (TIR) domain [IPR000157] (1); NB-ARC [IPR002182] (1); P-loop containing nucleoside triphosphate hydrolase [IPR027417] (1)                                                                                                                                                           | -                               | -                            | P_trifoliata_00240_mRNA_3.1     |
| GF0047049 | 0                            | 0                         | 1                            | 1-acyl-sn-glycerol-3-phosphate acyltransferase 2 (1)       | transferase activity, transferring acyl groups [GO:0016746 molecular_function] (1); metabolic process [GO:0008152 biological_process] (1)                                                                                                                                                                                                         | Phospholipid:glycerol acyltransferase [IPR012125] (1); Acyltransferase, C-terminal domain [IPR032098] (1)                                                                                                                                                                                                                | -                               | -                            | P_trifoliata_00240_mRNA_26.1    |
| GF0047048 | 0                            | 0                         | 1                            | Hypothetical protein (1)                                   | -                                                                                                                                                                                                                                                                                                                                                 | -                                                                                                                                                                                                                                                                                                                        | -                               | -                            | P_trifoliata_00240_mRNA_21.1    |
| GF0047047 | 0                            | 0                         | 1                            | Hypothetical protein (1)                                   | -                                                                                                                                                                                                                                                                                                                                                 | -                                                                                                                                                                                                                                                                                                                        | -                               | -                            | P_trifoliata_00240_mRNA_2.1     |
| GF0047046 | 0                            | 0                         | 1                            | Hypothetical protein (1)                                   | -                                                                                                                                                                                                                                                                                                                                                 | -                                                                                                                                                                                                                                                                                                                        | -                               | -                            | P_trifoliata_00240_mRNA_15.1    |
| GF0047045 | 0                            | 0                         | 1                            | Hypothetical protein (1)                                   | -                                                                                                                                                                                                                                                                                                                                                 | -                                                                                                                                                                                                                                                                                                                        | -                               | -                            | P_trifoliata_00240_mRNA_14.1    |
| GF0047044 | 0                            | 0                         | 1                            | Hypothetical protein (1)                                   | -                                                                                                                                                                                                                                                                                                                                                 | -                                                                                                                                                                                                                                                                                                                        | -                               | -                            | P_trifoliata_00240_mRNA_11.1    |
| GF0047043 | 0                            | 0                         | 1                            | Hypothetical protein (1)                                   | -                                                                                                                                                                                                                                                                                                                                                 | -                                                                                                                                                                                                                                                                                                                        | -                               | -                            | P_trifoliata_00240_mRNA_10.1    |
| GF0047042 | 0                            | 0                         | 1                            | Hypothetical protein (1)                                   | -                                                                                                                                                                                                                                                                                                                                                 | -                                                                                                                                                                                                                                                                                                                        | -                               | -                            | P_trifoliata_00239_mRNA_26.1    |
| GF0047041 | 0                            | 0                         | 1                            | Hypothetical protein (1)                                   | -                                                                                                                                                                                                                                                                                                                                                 | -                                                                                                                                                                                                                                                                                                                        | -                               | -                            | P_trifoliata_00239_mRNA_24.1    |
| GF0047040 | 0                            | 0                         | 1                            | Hypothetical protein (1)                                   | -                                                                                                                                                                                                                                                                                                                                                 | -                                                                                                                                                                                                                                                                                                                        | -                               | -                            | P_trifoliata_00239_mRNA_23.1    |
| GF0047039 | 0                            | 0                         | 1                            | Hypothetical protein (1)                                   | -                                                                                                                                                                                                                                                                                                                                                 | -                                                                                                                                                                                                                                                                                                                        | -                               | -                            | P_trifoliata_00239_mRNA_20.1    |
| GF0047038 | 0                            | 0                         | 1                            | CASP-like protein 5A1 (1)                                  | -                                                                                                                                                                                                                                                                                                                                                 | Domain of unknown function DUF588 [IPR067082] (1)                                                                                                                                                                                                                                                                        | -                               | -                            | P_trifoliata_00239_mRNA_19.1    |
| GF0047037 | 0                            | 0                         | 1                            | Hypothetical protein (1)                                   | -                                                                                                                                                                                                                                                                                                                                                 | -                                                                                                                                                                                                                                                                                                                        | -                               | -                            | P_trifoliata_00239_mRNA_13.1    |
| GF0047036 | 0                            | 0                         | 1                            | Hypothetical protein (1)                                   | -                                                                                                                                                                                                                                                                                                                                                 | -                                                                                                                                                                                                                                                                                                                        | -                               | -                            | P_trifoliata_00238_mRNA_8.1     |
| GF0047035 | 0                            | 0                         | 1                            | Hypothetical protein (1)                                   | DNA binding [GO:0003677 molecular_function] (1); nucleic acid binding [GO:0003676 molecular_function] (1); protein dimerization activity [GO:0046983 molecular_function] (1)                                                                                                                                                                      | Ribonuclease H-like domain [IPR012337] (1); Zinc finger, BED-type [IPR036565] (1); HAT, C-terminal dimerization domain [IPR008906] (1)                                                                                                                                                                                   | -                               | -                            | P_trifoliata_00238_mRNA_6.1     |
| GF0047034 | 0                            | 0                         | 1                            | Hypothetical protein (1)                                   | -                                                                                                                                                                                                                                                                                                                                                 | -                                                                                                                                                                                                                                                                                                                        | -                               | -                            | P_trifoliata_00238_mRNA_39.1    |
| GF0047033 | 0                            | 0                         | 1                            | Hypothetical protein (1)                                   | -                                                                                                                                                                                                                                                                                                                                                 | -                                                                                                                                                                                                                                                                                                                        | -                               | -                            | P_trifoliata_00238_mRNA_38.1    |
| GF0047032 | 0                            | 0                         | 1                            | Hypothetical protein (1)                                   | -                                                                                                                                                                                                                                                                                                                                                 | -                                                                                                                                                                                                                                                                                                                        | -                               | -                            | P_trifoliata_00238_mRNA_37.1    |
| GF0047031 | 0                            | 0                         | 1                            | Hypothetical protein (1)                                   | -                                                                                                                                                                                                                                                                                                                                                 | -                                                                                                                                                                                                                                                                                                                        | -                               | -                            | P_trifoliata_00238_mRNA_36.1    |
| GF0047030 | 0                            | 0                         | 1                            | Hypothetical protein (1)                                   | phosphoglucuronate dehydrogenase (decarboxylating) activity [GO:0004616 molecular_function] (1); NAD binding [GO:0051287 molecular_function] (1); oxidation-reduction process [GO:005114 biological_process] (1); oxidoreductase activity [GO:0016491 molecular_function] (1)                                                                     | NAD(P)-binding domain [IPR016040] (1); 6-phosphoglucuronate dehydrogenase, domain 2 [IPR013328] (1); 6-phosphoglucuronate dehydrogenase, NADP-binding [IPR006115] (1); 3-hydroxyisobutyrate dehydrogenase, NAD-binding domain [IPR029154] (1); 6-phosphoglucuronate dehydrogenase C-terminal domain-like [IPR008927] (1) | -                               | -                            | P_trifoliata_00238_mRNA_3.1     |
| GF0047029 | 0                            | 0                         | 1                            | Hypothetical protein (1)                                   | -                                                                                                                                                                                                                                                                                                                                                 | -                                                                                                                                                                                                                                                                                                                        | -                               | -                            | P_trifoliata_00238_mRNA_27.1    |
| GF0047028 | 0                            | 0                         | 1                            | Hypothetical protein (1)                                   | -                                                                                                                                                                                                                                                                                                                                                 | -                                                                                                                                                                                                                                                                                                                        | -                               | -                            | P_trifoliata_00238_mRNA_22.1    |
| GF0047027 | 0                            | 0                         | 1                            | Hypothetical protein (1)                                   | -                                                                                                                                                                                                                                                                                                                                                 | -                                                                                                                                                                                                                                                                                                                        | -                               | -                            | P_trifoliata_00238_mRNA_17.1    |
| GF0047026 | 0                            | 0                         | 1                            | Hypothetical protein (1)                                   | -                                                                                                                                                                                                                                                                                                                                                 | -                                                                                                                                                                                                                                                                                                                        | -                               | -                            | P_trifoliata_00238_mRNA_13.1    |
| GF0047025 | 0                            | 0                         | 1                            | Hypothetical protein (1)                                   | -                                                                                                                                                                                                                                                                                                                                                 | -                                                                                                                                                                                                                                                                                                                        | -                               | -                            | P_trifoliata_00238_mRNA_11.1    |
| GF0047024 | 0                            | 0                         | 1                            | Hypothetical protein (1)                                   | -                                                                                                                                                                                                                                                                                                                                                 | -                                                                                                                                                                                                                                                                                                                        | -                               | -                            | P_trifoliata_00238_mRNA_1.1     |
| GF0047023 | 0                            | 0                         | 1                            | Hypothetical protein (1)                                   | transferase activity, transferring glycosyl groups [GO:0016757 molecular_function] (1); polygalacturonate 4- $\alpha$ -galacturonosyltransferase activity [GO:0047262 molecular_function] (1)                                                                                                                                                     | Plant galacturonosyltransferase GAUT [IPR029993] (1); GroEL-like equatorial domain [IPR027413] (1); Glycosyl transferase, family 8 [IPR002495] (1)                                                                                                                                                                       | -                               | -                            | P_trifoliata_00237_mRNA_53.1    |
| GF0047022 | 0                            | 0                         | 1                            | Hypothetical protein (1)                                   | -                                                                                                                                                                                                                                                                                                                                                 | -                                                                                                                                                                                                                                                                                                                        | -                               | -                            | P_trifoliata_00237_mRNA_24.1    |
| GF0047021 | 0                            | 0                         | 1                            | Hypothetical protein (1)                                   | DNA binding [GO:0003677 molecular_function] (1)                                                                                                                                                                                                                                                                                                   | B3 DNA binding domain [IPR003340] (1); DNA-binding pseudobared domain [IPR015300] (1)                                                                                                                                                                                                                                    | -                               | -                            | P_trifoliata_00237_mRNA_22.1    |
| GF0047020 | 0                            | 0                         | 1                            | Hypothetical protein (1)                                   | -                                                                                                                                                                                                                                                                                                                                                 | -                                                                                                                                                                                                                                                                                                                        | -                               | -                            | P_trifoliata_00237_mRNA_10.1    |
| GF0047019 | 0                            | 0                         | 1                            | Hypothetical protein (1)                                   | -                                                                                                                                                                                                                                                                                                                                                 | -                                                                                                                                                                                                                                                                                                                        | -                               | -                            | P_trifoliata_00237_mRNA_1.1     |
| GF0047018 | 0                            | 0                         | 1                            | Hypothetical protein (1)                                   | -                                                                                                                                                                                                                                                                                                                                                 | -                                                                                                                                                                                                                                                                                                                        | -                               | -                            | P_trifoliata_00236_mRNA_39.1    |
| GF0047017 | 0                            | 0                         | 1                            | Lactoylseramide 4- $\alpha$ -galactosyltransferase (1)     | -                                                                                                                                                                                                                                                                                                                                                 | Glycosyltransferase, DXD sugar-binding motif [IPR007577] (1); Alpha 1-4-glycosyltransferase domain [IPR007652] (1); Nucleotide-diphosphate-sugar transferase [IPR029044] (1)                                                                                                                                             | -                               | -                            | P_trifoliata_00236_mRNA_31.1    |
| GF0047016 | 0                            | 0                         | 1                            | Lacase (1)                                                 | copper ion binding [GO:0005507 molecular_function] (1); oxidoreductase activity [GO:0016491 molecular_function] (1); oxidation-reduction process [GO:005114 biological_process] (1)                                                                                                                                                               | Multicopper oxidase, type 1 [IPR001117] (1); Multicopper oxidase, type 2 [IPR01780] (1); Cuprodoxin [IPR008972] (1)                                                                                                                                                                                                      | -                               | -                            | P_trifoliata_00236_mRNA_17.1    |
| GF0047015 | 0                            | 0                         | 1                            | Peptide transporter (1)                                    | membrane [GO:0016020 cellular_component] (1); transport [GO:0006810 biological_process] (1); transporter activity [GO:0005215 molecular_function] (1); oligopeptide transport [GO:0006857 biological_process] (1)                                                                                                                                 | Major facilitator superfamily domain [IPR020846] (1); Proton-dependent oligopeptide transporter family [IPR000109] (1); PTR2 family proton/oligopeptide symporter, conserved site [IPR018456] (1)                                                                                                                        | -                               | -                            | P_trifoliata_00236_mRNA_16.1    |
| GF0047014 | 0                            | 0                         | 1                            | Retrotransposon gag protein (1)                            | -                                                                                                                                                                                                                                                                                                                                                 | -                                                                                                                                                                                                                                                                                                                        | -                               | -                            | P_trifoliata_00235_mRNA_4.1     |
| GF0047013 | 0                            | 0                         | 1                            | Hypothetical protein (1)                                   | -                                                                                                                                                                                                                                                                                                                                                 | -                                                                                                                                                                                                                                                                                                                        | -                               | -                            | P_trifoliata_00235_mRNA_36.1    |
| GF0047012 | 0                            | 0                         | 1                            | Putative phosphomethylpyrimidine synthase-like (1)         | protein disulfide oxidoreductase activity [GO:0015035 molecular_function] (1); cell redox homeostasis [GO:0045454 biological_process] (1); electron carrier activity [GO:0009055 molecular_function] (1)                                                                                                                                          | Glutaredoxin [IPR002109] (1); Thioredoxin-like fold [IPR012336] (1); Glutaredoxin subgroup [IPR014025] (1)                                                                                                                                                                                                               | -                               | -                            | P_trifoliata_00235_mRNA_32.1    |

| ID       | Num. in <i>C. clementiae</i> | Num. in <i>C. canthii</i> | Num. in <i>P. trifoliata</i> | Note                                                    | GO                                                                                                                                                                                                                                                                                                                                                                                                                | InterPro                                                                                                                                                                                                                                                                                   | Members in <i>C. clementiae</i> | Members in <i>C. canthii</i> | Members in <i>P. trifoliata</i> |
|----------|------------------------------|---------------------------|------------------------------|---------------------------------------------------------|-------------------------------------------------------------------------------------------------------------------------------------------------------------------------------------------------------------------------------------------------------------------------------------------------------------------------------------------------------------------------------------------------------------------|--------------------------------------------------------------------------------------------------------------------------------------------------------------------------------------------------------------------------------------------------------------------------------------------|---------------------------------|------------------------------|---------------------------------|
| GF004701 | 0                            | 0                         | 1                            | Fiber protein Fb15 (1)                                  | ATP binding [GO:0005524 molecular_function] (1); DNA binding [GO:0003677 molecular_function] (1); DNA repair [GO:0006281 biological_process] (1); protein kinase activity [GO:0004672 molecular_function] (1); protein phosphorylation [GO:0006468 biological_process] (1); DNA recombination [GO:0006310 biological_process] (1); DNA ligase (ATP) activity [GO:0003910 molecular_function] (1)                  | Protein kinase domain [IPR000719] (1); Protein kinase-like domain [IPR011009] (1); Serine/threonine/dual specificity protein kinase, catalytic domain [IPR022901] (1); DNA ligase, ATP-dependent, N-terminal [IPR023088] (1); Serine/threonine-protein kinase, active site [IPR008271] (1) | -                               | -                            | P_trifoliata_00235_mRNA_26.1    |
| GF004709 | 0                            | 0                         | 1                            | Hypothetical protein (1)                                |                                                                                                                                                                                                                                                                                                                                                                                                                   |                                                                                                                                                                                                                                                                                            |                                 |                              | P_trifoliata_00235_mRNA_13.1    |
| GF004708 | 0                            | 0                         | 1                            | Verticillium wilt resistance-like protein (1)           | protein binding [GO:0005515 molecular_function] (1)                                                                                                                                                                                                                                                                                                                                                               | Leucine-rich repeat domain, L domain-like [IPR032675] (1); Leucine-rich repeat [IPR001611] (1); Leucine-rich repeat-containing N-terminal, plant-type [IPR013210] (1)                                                                                                                      | -                               | -                            | P_trifoliata_00234_mRNA_48.1    |
| GF004707 | 0                            | 0                         | 1                            | Truncated verticillium wilt resistance-like protein (1) | protein binding [GO:0005515 molecular_function] (1)                                                                                                                                                                                                                                                                                                                                                               | Leucine-rich repeat domain, L domain-like [IPR032675] (1); Leucine-rich repeat [IPR001611] (1); Leucine-rich repeat-containing N-terminal, plant-type [IPR013210] (1)                                                                                                                      | -                               | -                            | P_trifoliata_00234_mRNA_46.1    |
| GF004706 | 0                            | 0                         | 1                            | Truncated verticillium wilt resistance-like protein (1) |                                                                                                                                                                                                                                                                                                                                                                                                                   | Leucine-rich repeat-containing N-terminal, plant-type [IPR013210] (1); Leucine-rich repeat domain, L domain-like [IPR032675] (1)                                                                                                                                                           | -                               | -                            | P_trifoliata_00234_mRNA_44.1    |
| GF004705 | 0                            | 0                         | 1                            | Hypothetical protein (1)                                |                                                                                                                                                                                                                                                                                                                                                                                                                   |                                                                                                                                                                                                                                                                                            | -                               | -                            | P_trifoliata_00234_mRNA_33.1    |
| GF004704 | 0                            | 0                         | 1                            | Hypothetical protein (1)                                |                                                                                                                                                                                                                                                                                                                                                                                                                   |                                                                                                                                                                                                                                                                                            | -                               | -                            | P_trifoliata_00234_mRNA_1.1     |
| GF004703 | 0                            | 0                         | 1                            | Hypothetical protein (1)                                |                                                                                                                                                                                                                                                                                                                                                                                                                   |                                                                                                                                                                                                                                                                                            | -                               | -                            | P_trifoliata_00233_mRNA_47.1    |
| GF004702 | 0                            | 0                         | 1                            | Hypothetical protein (1)                                |                                                                                                                                                                                                                                                                                                                                                                                                                   |                                                                                                                                                                                                                                                                                            | -                               | -                            | P_trifoliata_00233_mRNA_41.1    |
| GF004701 | 0                            | 0                         | 1                            | Vignain (1)                                             | proteolysis [GO:0006508 biological_process] (1); cysteine-type peptidase activity [GO:0008234 molecular_function] (1)                                                                                                                                                                                                                                                                                             | Cysteine peptidase, asparagine active site [IPR025661] (1); Peptidase C1A, papain C-terminal [IPR000680] (1); Cathepsin propeptide inhibitor domain [I29] [IPR013201] (1); Peptidase C1A [IPR013128] (1); Cysteine peptidase, histidine active site [IPR025660] (1)                        | -                               | -                            | P_trifoliata_00233_mRNA_36.1    |
| GF004700 | 0                            | 0                         | 1                            | Hypothetical protein (1)                                | branched-chain amino acid biosynthetic process [GO:0009082 biological_process] (1); ketol-acid reductoisomerase activity [GO:0004455 molecular_function] (1); oxidoreductase activity [GO:0016491 molecular_function] (1); oxidation-reduction process [GO:0055114 biological_process] (1)                                                                                                                        | Ketol-acid reductoisomerase [IPR013023] (1); Acetohydroxy acid isomeroreductase C-terminal [IPR008906] (1); 6-phosphogluconate dehydrogenase C-terminal domain-like [IPR008927] (1)                                                                                                        | -                               | -                            | P_trifoliata_00233_mRNA_30.1    |
| GF004699 | 0                            | 0                         | 1                            | Nicotinamine synthase 9 (1)                             |                                                                                                                                                                                                                                                                                                                                                                                                                   | Agens-like domain [IPR008395] (1); Agens domain, plant type [IPR014002] (1)                                                                                                                                                                                                                | -                               | -                            | P_trifoliata_00233_mRNA_24.1    |
| GF004698 | 0                            | 0                         | 1                            | Hypothetical protein (1)                                |                                                                                                                                                                                                                                                                                                                                                                                                                   |                                                                                                                                                                                                                                                                                            | -                               | -                            | P_trifoliata_00233_mRNA_11.1    |
| GF004697 | 0                            | 0                         | 1                            | Hypothetical protein (1)                                | DNA-templated transcription, termination [GO:0006533 biological_process] (1)                                                                                                                                                                                                                                                                                                                                      | Rho termination factor, N-terminal [IPR01112] (1)                                                                                                                                                                                                                                          | -                               | -                            | P_trifoliata_00233_mRNA_1.1     |
| GF004696 | 0                            | 0                         | 1                            | Hypothetical protein (1)                                |                                                                                                                                                                                                                                                                                                                                                                                                                   |                                                                                                                                                                                                                                                                                            | -                               | -                            | P_trifoliata_00232_mRNA_40.1    |
| GF004695 | 0                            | 0                         | 1                            | Hypothetical protein (1)                                |                                                                                                                                                                                                                                                                                                                                                                                                                   |                                                                                                                                                                                                                                                                                            | -                               | -                            | P_trifoliata_00232_mRNA_39.1    |
| GF004694 | 0                            | 0                         | 1                            | Hypothetical protein (1)                                |                                                                                                                                                                                                                                                                                                                                                                                                                   |                                                                                                                                                                                                                                                                                            | -                               | -                            | P_trifoliata_00232_mRNA_38.1    |
| GF004693 | 0                            | 0                         | 1                            | Hypothetical protein (1)                                |                                                                                                                                                                                                                                                                                                                                                                                                                   |                                                                                                                                                                                                                                                                                            | -                               | -                            | P_trifoliata_00232_mRNA_34.1    |
| GF004692 | 0                            | 0                         | 1                            | Hypothetical protein (1)                                |                                                                                                                                                                                                                                                                                                                                                                                                                   |                                                                                                                                                                                                                                                                                            | -                               | -                            | P_trifoliata_00232_mRNA_33.1    |
| GF004691 | 0                            | 0                         | 1                            | Hypothetical protein (1)                                | metabolic process [GO:0008152 biological_process] (1); transferase activity, transferring hexoyl groups [GO:0016758 molecular_function] (1)                                                                                                                                                                                                                                                                       | UDP-glucuronyl/UDP-glucosyltransferase [IPR002213] (1)                                                                                                                                                                                                                                     | -                               | -                            | P_trifoliata_00232_mRNA_26.1    |
| GF004690 | 0                            | 0                         | 1                            | MADS-box transcription factor family protein (1)        |                                                                                                                                                                                                                                                                                                                                                                                                                   |                                                                                                                                                                                                                                                                                            | -                               | -                            | P_trifoliata_00231_mRNA_9.1     |
| GF004689 | 0                            | 0                         | 1                            | Hypothetical protein (1)                                |                                                                                                                                                                                                                                                                                                                                                                                                                   |                                                                                                                                                                                                                                                                                            | -                               | -                            | P_trifoliata_00231_mRNA_8.1     |
| GF004688 | 0                            | 0                         | 1                            | Hypothetical protein (1)                                | hydrolase activity [GO:0016787 molecular_function] (1); metabolic process [GO:0008152 biological_process] (1)                                                                                                                                                                                                                                                                                                     | Alpha/Beta hydrolase fold [IPR029058] (1); Alpha/beta hydrolase fold-3 [IPR013094] (1)                                                                                                                                                                                                     | -                               | -                            | P_trifoliata_00231_mRNA_36.1    |
| GF004687 | 0                            | 0                         | 1                            | Agmatase-like MADS-box protein AGL80 (1)                | protein dimerization activity [GO:0046983 molecular_function] (1); DNA binding [GO:0003677 molecular_function] (1)                                                                                                                                                                                                                                                                                                | Transcription factor, MADS-box [IPR002100] (1)                                                                                                                                                                                                                                             | -                               | -                            | P_trifoliata_00231_mRNA_3.1     |
| GF004686 | 0                            | 0                         | 1                            | Hypothetical protein (1)                                |                                                                                                                                                                                                                                                                                                                                                                                                                   |                                                                                                                                                                                                                                                                                            | -                               | -                            | P_trifoliata_00231_mRNA_29.1    |
| GF004685 | 0                            | 0                         | 1                            | Hypothetical protein (1)                                |                                                                                                                                                                                                                                                                                                                                                                                                                   |                                                                                                                                                                                                                                                                                            | -                               | -                            | P_trifoliata_00231_mRNA_24.1    |
| GF004684 | 0                            | 0                         | 1                            | Hypothetical protein (1)                                | cysteine-type peptidase activity [GO:0008234 molecular_function] (1); proteolysis [GO:0006508 biological_process] (1)                                                                                                                                                                                                                                                                                             | Ulp1 protease family, C-terminal catalytic domain [IPR003653] (1)                                                                                                                                                                                                                          | -                               | -                            | P_trifoliata_00231_mRNA_1.1     |
| GF004683 | 0                            | 0                         | 1                            | Hypothetical protein (1)                                |                                                                                                                                                                                                                                                                                                                                                                                                                   |                                                                                                                                                                                                                                                                                            | -                               | -                            | P_trifoliata_00230_mRNA_31.1    |
| GF004682 | 0                            | 0                         | 1                            | Hypothetical protein (1)                                |                                                                                                                                                                                                                                                                                                                                                                                                                   |                                                                                                                                                                                                                                                                                            | -                               | -                            | P_trifoliata_00230_mRNA_28.1    |
| GF004681 | 0                            | 0                         | 1                            | 40S ribosomal protein S23 (1)                           | structural constituent of ribosome [GO:0003735 molecular_function] (1); intracellular [GO:0005622 cellular_component] (1); translation [GO:0006412 biological_process] (1); ribosome [GO:0005840 cellular_component] (1); small ribosomal subunit [GO:0015915 cellular_component] (1)                                                                                                                             | Nucleic acid-binding, OB-fold [IPR012340] (1); Ribosomal protein S12.S23 [IPR006032] (1); Ribosomal protein S23, eukaryotic/archaeal [IPR005680] (1)                                                                                                                                       | -                               | -                            | P_trifoliata_00230_mRNA_14.1    |
| GF004680 | 0                            | 0                         | 1                            | Hypothetical protein (1)                                |                                                                                                                                                                                                                                                                                                                                                                                                                   |                                                                                                                                                                                                                                                                                            | -                               | -                            | P_trifoliata_00230_mRNA_10.1    |
| GF004679 | 0                            | 0                         | 1                            | Hypothetical protein (1)                                | aminoacyl-tRNA ligase activity [GO:0004812 molecular_function] (1); RNA aminoacylation for protein translation [GO:0006418 biological_process] (1); ATP binding [GO:0005524 molecular_function] (1); nucleotide binding [GO:0000166 molecular_function] (1); aminoacyl-tRNA ligase activity [GO:0004812 molecular_function] (1)                                                                                   | Aminoacyl-tRNA synthetase, class Ia, anticodon-binding [IPR009080] (1); Aminoacyl-tRNA synthetase, class Ia [IPR023001] (1); Rossmann-like alpha/beta/alpha sandwich fold [IPR014729] (1)                                                                                                  | -                               | -                            | P_trifoliata_00229_mRNA_41.1    |
| GF004678 | 0                            | 0                         | 1                            | Hypothetical protein (1)                                | tRNA aminoacylation for protein translation [GO:0006418 biological_process] (1); ATP binding [GO:0005524 molecular_function] (1); nucleotide binding [GO:0000166 molecular_function] (1); aminoacyl-tRNA ligase activity [GO:0004812 molecular_function] (1)                                                                                                                                                      | Methionyl-valyl-leucyl-isoleucyl-tRNA synthetase, anticodon-binding [IPR013155] (1); Aminoacyl-tRNA synthetase, class Ia, anticodon-binding [IPR009080] (1)                                                                                                                                | -                               | -                            | P_trifoliata_00229_mRNA_40.1    |
| GF004677 | 0                            | 0                         | 1                            | TMV resistance N (1)                                    | protein binding [GO:0005515 molecular_function] (1)                                                                                                                                                                                                                                                                                                                                                               | Leucine-rich repeat domain, L domain-like [IPR032675] (1); Leucine-rich repeat [IPR001611] (1)                                                                                                                                                                                             | -                               | -                            | P_trifoliata_00229_mRNA_36.1    |
| GF004676 | 0                            | 0                         | 1                            | Hypothetical protein (1)                                |                                                                                                                                                                                                                                                                                                                                                                                                                   |                                                                                                                                                                                                                                                                                            | -                               | -                            | P_trifoliata_00229_mRNA_23.1    |
| GF004675 | 0                            | 0                         | 1                            | Hypothetical protein (1)                                |                                                                                                                                                                                                                                                                                                                                                                                                                   |                                                                                                                                                                                                                                                                                            | -                               | -                            | P_trifoliata_00229_mRNA_13.1    |
| GF004674 | 0                            | 0                         | 1                            | Hypothetical protein (1)                                |                                                                                                                                                                                                                                                                                                                                                                                                                   |                                                                                                                                                                                                                                                                                            | -                               | -                            | P_trifoliata_00229_mRNA_12.1    |
| GF004673 | 0                            | 0                         | 1                            | Hypothetical protein (1)                                |                                                                                                                                                                                                                                                                                                                                                                                                                   |                                                                                                                                                                                                                                                                                            | -                               | -                            | P_trifoliata_00229_mRNA_11.1    |
| GF004672 | 0                            | 0                         | 1                            | Hypothetical protein (1)                                | oxidoreductase activity [GO:0016491 molecular_function] (1); oxidation-reduction process [GO:0055114 biological_process] (1)                                                                                                                                                                                                                                                                                      | FAD/NAD(P)-binding domain [IPR023753] (1)                                                                                                                                                                                                                                                  | -                               | -                            | P_trifoliata_00228_mRNA_8.1     |
| GF004671 | 0                            | 0                         | 1                            | Salicylate 1-monooxygenase (1)                          | oxidation-reduction process [GO:0055114 biological_process] (1); oxidoreductase activity [GO:0016491 molecular_function] (1)                                                                                                                                                                                                                                                                                      | FAD/NAD(P)-binding domain [IPR023753] (1)                                                                                                                                                                                                                                                  | -                               | -                            | P_trifoliata_00228_mRNA_7.1     |
| GF004670 | 0                            | 0                         | 1                            | Hypothetical protein (1)                                |                                                                                                                                                                                                                                                                                                                                                                                                                   | Acyl-CoA N-acyltransferase [IPR016181] (1)                                                                                                                                                                                                                                                 | -                               | -                            | P_trifoliata_00228_mRNA_6.1     |
| GF004669 | 0                            | 0                         | 1                            | Hypothetical protein (1)                                |                                                                                                                                                                                                                                                                                                                                                                                                                   |                                                                                                                                                                                                                                                                                            | -                               | -                            | P_trifoliata_00228_mRNA_42.1    |
| GF004668 | 0                            | 0                         | 1                            | Hypothetical protein (1)                                |                                                                                                                                                                                                                                                                                                                                                                                                                   |                                                                                                                                                                                                                                                                                            | -                               | -                            | P_trifoliata_00228_mRNA_41.1    |
| GF004667 | 0                            | 0                         | 1                            | Hypothetical protein (1)                                | oxidation-reduction process [GO:0055114 biological_process] (1); oxidoreductase activity [GO:0016491 molecular_function] (1)                                                                                                                                                                                                                                                                                      | FAD/NAD(P)-binding domain [IPR023753] (1)                                                                                                                                                                                                                                                  | -                               | -                            | P_trifoliata_00228_mRNA_41.1    |
| GF004666 | 0                            | 0                         | 1                            | Hypothetical protein (1)                                |                                                                                                                                                                                                                                                                                                                                                                                                                   |                                                                                                                                                                                                                                                                                            | -                               | -                            | P_trifoliata_00228_mRNA_35.1    |
| GF004665 | 0                            | 0                         | 1                            | Extra-large guanine nucleotide-binding protein 3 (1)    | guanylyl nucleotide binding [GO:0019001 molecular_function] (1); signal transducer activity [GO:0004871 molecular_function] (1); GTPase activity [GO:0003724 molecular_function] (1); G-protein beta/gamma-subunit complex binding [GO:0031863 molecular_function] (1); G-protein coupled receptor signaling pathway [GO:0007186 biological_process] (1); signal transduction [GO:0007165 biological_process] (1) | Guanine nucleotide binding protein (G-protein), alpha subunit [IPR001019] (1); G-protein alpha subunit, helical insertion [IPR011025] (1); P-loop containing nucleoside triphosphate hydrolase [IPR027417] (1)                                                                             | -                               | -                            | P_trifoliata_00228_mRNA_20.1    |
| GF004664 | 0                            | 0                         | 1                            | Hypothetical protein (1)                                | cysteine-type peptidase activity [GO:0008234 molecular_function] (1); proteolysis [GO:0006508 biological_process] (1)                                                                                                                                                                                                                                                                                             | Ulp1 protease family, C-terminal catalytic domain [IPR003653] (1)                                                                                                                                                                                                                          | -                               | -                            | P_trifoliata_00228_mRNA_2.1     |
| GF004663 | 0                            | 0                         | 1                            | Hypothetical protein (1)                                |                                                                                                                                                                                                                                                                                                                                                                                                                   |                                                                                                                                                                                                                                                                                            | -                               | -                            | P_trifoliata_00228_mRNA_11.1    |

| ID        | Num. in <i>C. clementiae</i> | Num. in <i>C. canthii</i> | Num. in <i>P. trifoliata</i> | Note                                                     | GO                                                                                                                                                                                                                                                                                                                                                                                                                                                                                                                                        | InterPro                                                                                                                                                                                                                                                                                                                                                                                                                 | Members in <i>C. clementiae</i> | Members in <i>C. canthii</i> | Members in <i>P. trifoliata</i> |
|-----------|------------------------------|---------------------------|------------------------------|----------------------------------------------------------|-------------------------------------------------------------------------------------------------------------------------------------------------------------------------------------------------------------------------------------------------------------------------------------------------------------------------------------------------------------------------------------------------------------------------------------------------------------------------------------------------------------------------------------------|--------------------------------------------------------------------------------------------------------------------------------------------------------------------------------------------------------------------------------------------------------------------------------------------------------------------------------------------------------------------------------------------------------------------------|---------------------------------|------------------------------|---------------------------------|
| GF0046962 | 0                            | 0                         | 1                            | Hypothetical protein (1)                                 |                                                                                                                                                                                                                                                                                                                                                                                                                                                                                                                                           |                                                                                                                                                                                                                                                                                                                                                                                                                          | -                               | -                            | P_trifoliata_00228_mRNA_10.1    |
| GF0046961 | 0                            | 0                         | 1                            | Hypothetical protein (1)                                 |                                                                                                                                                                                                                                                                                                                                                                                                                                                                                                                                           |                                                                                                                                                                                                                                                                                                                                                                                                                          | -                               | -                            | P_trifoliata_00228_mRNA_1.1     |
| GF0046960 | 0                            | 0                         | 1                            | Hypothetical protein (1)                                 |                                                                                                                                                                                                                                                                                                                                                                                                                                                                                                                                           |                                                                                                                                                                                                                                                                                                                                                                                                                          | -                               | -                            | P_trifoliata_00227_mRNA_9.1     |
| GF0046959 | 0                            | 0                         | 1                            | Hypothetical protein (1)                                 |                                                                                                                                                                                                                                                                                                                                                                                                                                                                                                                                           |                                                                                                                                                                                                                                                                                                                                                                                                                          | -                               | -                            | P_trifoliata_00227_mRNA_8.1     |
| GF0046958 | 0                            | 0                         | 1                            | Hypothetical protein (1)                                 | RNA-DNA hybrid ribonuclease activity [GO:0004523 molecular_function] (1); nucleic acid binding [GO:0003676 molecular_function] (1)                                                                                                                                                                                                                                                                                                                                                                                                        | Endonuclease (nucleoside) phosphatase [IPRO05135] (1); Ribonuclease H domain [IPRO02156] (1); Ribonuclease H-like domain [IPRO12357] (1)                                                                                                                                                                                                                                                                                 | -                               | -                            | P_trifoliata_00227_mRNA_40.1    |
| GF0046957 | 0                            | 0                         | 1                            | Hypothetical protein (1)                                 |                                                                                                                                                                                                                                                                                                                                                                                                                                                                                                                                           |                                                                                                                                                                                                                                                                                                                                                                                                                          | -                               | -                            | P_trifoliata_00227_mRNA_39.1    |
| GF0046956 | 0                            | 0                         | 1                            | Hypothetical protein (1)                                 |                                                                                                                                                                                                                                                                                                                                                                                                                                                                                                                                           |                                                                                                                                                                                                                                                                                                                                                                                                                          | -                               | -                            | P_trifoliata_00227_mRNA_25.1    |
| GF0046955 | 0                            | 0                         | 1                            | Hypothetical protein (1)                                 |                                                                                                                                                                                                                                                                                                                                                                                                                                                                                                                                           |                                                                                                                                                                                                                                                                                                                                                                                                                          | -                               | -                            | P_trifoliata_00227_mRNA_23.1    |
| GF0046954 | 0                            | 0                         | 1                            | Hypothetical protein (1)                                 | nucleobase-containing compound metabolic process [GO:0006139 biological_process] (1); nucleobase-containing compound kinase activity [GO:0019205 molecular_function] (1); ATP binding [GO:0005524 molecular_function] (1)                                                                                                                                                                                                                                                                                                                 | ATPase, AAA-type, core [IPRO03959] (1); P-loop containing nucleoside triphosphate hydrolase [IPRO27417] (1); Adenylate kinase/UMP-CMP kinase [IPRO00501] (1); ATPase, AAA-type, conserved site [IPRO03960] (1)                                                                                                                                                                                                           | -                               | -                            | P_trifoliata_00227_mRNA_18.1    |
| GF0046953 | 0                            | 0                         | 1                            | Hypothetical protein (1)                                 | nickel cation binding [GO:0016151 molecular_function] (1); urea catabolic process [GO:0043419 biological_process] (1)                                                                                                                                                                                                                                                                                                                                                                                                                     | Urease, gamma/gamma-beta subunit [IPRO02026] (1); Urease, beta subunit [IPRO02019] (1); Urease, gamma-beta subunit [IPRO08223] (1)                                                                                                                                                                                                                                                                                       | -                               | -                            | P_trifoliata_00227_mRNA_17.1    |
| GF0046952 | 0                            | 0                         | 1                            | Hypothetical protein (1)                                 |                                                                                                                                                                                                                                                                                                                                                                                                                                                                                                                                           |                                                                                                                                                                                                                                                                                                                                                                                                                          | -                               | -                            | P_trifoliata_00227_mRNA_12.1    |
| GF0046951 | 0                            | 0                         | 1                            | Hypothetical protein (1)                                 |                                                                                                                                                                                                                                                                                                                                                                                                                                                                                                                                           |                                                                                                                                                                                                                                                                                                                                                                                                                          | -                               | -                            | P_trifoliata_00226_mRNA_9.1     |
| GF0046950 | 0                            | 0                         | 1                            | Hypothetical protein (1)                                 |                                                                                                                                                                                                                                                                                                                                                                                                                                                                                                                                           |                                                                                                                                                                                                                                                                                                                                                                                                                          | -                               | -                            | P_trifoliata_00226_mRNA_42.1    |
| GF0046949 | 0                            | 0                         | 1                            | Hypothetical protein (1)                                 |                                                                                                                                                                                                                                                                                                                                                                                                                                                                                                                                           |                                                                                                                                                                                                                                                                                                                                                                                                                          | -                               | -                            | P_trifoliata_00226_mRNA_41.1    |
| GF0046948 | 0                            | 0                         | 1                            | Hypothetical protein (1)                                 |                                                                                                                                                                                                                                                                                                                                                                                                                                                                                                                                           |                                                                                                                                                                                                                                                                                                                                                                                                                          | -                               | -                            | P_trifoliata_00226_mRNA_40.1    |
| GF0046947 | 0                            | 0                         | 1                            | Hypothetical protein (1)                                 |                                                                                                                                                                                                                                                                                                                                                                                                                                                                                                                                           |                                                                                                                                                                                                                                                                                                                                                                                                                          | -                               | -                            | P_trifoliata_00226_mRNA_38.1    |
| GF0046946 | 0                            | 0                         | 1                            | Hypothetical protein (1)                                 |                                                                                                                                                                                                                                                                                                                                                                                                                                                                                                                                           |                                                                                                                                                                                                                                                                                                                                                                                                                          | -                               | -                            | P_trifoliata_00226_mRNA_37.1    |
| GF0046945 | 0                            | 0                         | 1                            | Hypothetical protein (1)                                 |                                                                                                                                                                                                                                                                                                                                                                                                                                                                                                                                           |                                                                                                                                                                                                                                                                                                                                                                                                                          | -                               | -                            | P_trifoliata_00226_mRNA_3.1     |
| GF0046944 | 0                            | 0                         | 1                            | Hypothetical protein (1)                                 | protein dimerization activity [GO:004983 molecular_function] (1); nucleic acid binding [GO:0003676 molecular_function] (1)                                                                                                                                                                                                                                                                                                                                                                                                                | Ribonuclease H-like domain [IPRO12337] (1); HAT, C-terminal dimerization domain [IPRO08906] (1)                                                                                                                                                                                                                                                                                                                          | -                               | -                            | P_trifoliata_00226_mRNA_20.1    |
| GF0046943 | 0                            | 0                         | 1                            | Hypothetical protein (1)                                 |                                                                                                                                                                                                                                                                                                                                                                                                                                                                                                                                           |                                                                                                                                                                                                                                                                                                                                                                                                                          | -                               | -                            | P_trifoliata_00226_mRNA_2.1     |
| GF0046942 | 0                            | 0                         | 1                            | Hypothetical protein (1)                                 |                                                                                                                                                                                                                                                                                                                                                                                                                                                                                                                                           |                                                                                                                                                                                                                                                                                                                                                                                                                          | -                               | -                            | P_trifoliata_00226_mRNA_12.1    |
| GF0046941 | 0                            | 0                         | 1                            | Hypothetical protein (1)                                 |                                                                                                                                                                                                                                                                                                                                                                                                                                                                                                                                           |                                                                                                                                                                                                                                                                                                                                                                                                                          | -                               | -                            | P_trifoliata_00226_mRNA_10.1    |
| GF0046940 | 0                            | 0                         | 1                            | Hypothetical protein (1)                                 |                                                                                                                                                                                                                                                                                                                                                                                                                                                                                                                                           | Reverse transcriptase domain [IPRO00477] (1)                                                                                                                                                                                                                                                                                                                                                                             | -                               | -                            | P_trifoliata_00225_mRNA_27.1    |
| GF0046939 | 0                            | 0                         | 1                            | Hypothetical protein (1)                                 |                                                                                                                                                                                                                                                                                                                                                                                                                                                                                                                                           |                                                                                                                                                                                                                                                                                                                                                                                                                          | -                               | -                            | P_trifoliata_00225_mRNA_13.1    |
| GF0046938 | 0                            | 0                         | 1                            | Hypothetical protein (1)                                 |                                                                                                                                                                                                                                                                                                                                                                                                                                                                                                                                           |                                                                                                                                                                                                                                                                                                                                                                                                                          | -                               | -                            | P_trifoliata_00224_mRNA_7.1     |
| GF0046937 | 0                            | 0                         | 1                            | Hypothetical protein (1)                                 |                                                                                                                                                                                                                                                                                                                                                                                                                                                                                                                                           |                                                                                                                                                                                                                                                                                                                                                                                                                          | -                               | -                            | P_trifoliata_00224_mRNA_6.1     |
| GF0046936 | 0                            | 0                         | 1                            | Hypothetical protein (1)                                 |                                                                                                                                                                                                                                                                                                                                                                                                                                                                                                                                           |                                                                                                                                                                                                                                                                                                                                                                                                                          | -                               | -                            | P_trifoliata_00224_mRNA_35.1    |
| GF0046935 | 0                            | 0                         | 1                            | Embryonic abundant protein-like (1)                      |                                                                                                                                                                                                                                                                                                                                                                                                                                                                                                                                           |                                                                                                                                                                                                                                                                                                                                                                                                                          | -                               | -                            | P_trifoliata_00224_mRNA_32.1    |
| GF0046934 | 0                            | 0                         | 1                            | Hypothetical protein (1)                                 |                                                                                                                                                                                                                                                                                                                                                                                                                                                                                                                                           |                                                                                                                                                                                                                                                                                                                                                                                                                          | -                               | -                            | P_trifoliata_00224_mRNA_27.1    |
| GF0046933 | 0                            | 0                         | 1                            | Putative far-red impaired response protein (1)           | regulation of transcription, DNA-templated [GO:0006355 biological_process] (1)                                                                                                                                                                                                                                                                                                                                                                                                                                                            | MULE transposase domain [IPRO18289] (1); FAR1 DNA binding domain [IPRO04330] (1); FHY3/FAR1 family [IPRO31052] (1)                                                                                                                                                                                                                                                                                                       | -                               | -                            | P_trifoliata_00224_mRNA_16.1    |
| GF0046932 | 0                            | 0                         | 1                            | Ras-related protein RAB22a (1)                           | signal transduction [GO:0007165 biological_process] (1); intracellular [GO:0005622 cellular_component] (1); GTP binding [GO:0005525 molecular_function] (1); intracellular protein transport [GO:0006886 biological_process] (1); small GTPase mediated signal transduction [GO:0007264 biological_process] (1); microcytoplasmic transport [GO:0006913 biological_process] (1); membrane [GO:0016020 cellular_component] (1); protein transport [GO:0015011 biological_process] (1); GTPase activity [GO:0003924 molecular_function] (1) | Small GTPase superfamily, Rho type [IPRO03578] (1); Small GTP-binding protein domain [IPRO05259] (1); P-loop containing nucleoside triphosphate hydrolase [IPRO27417] (1); Small GTPase superfamily [IPRO03906] (1); Ras GTPase [IPRO02041] (1); Sigma-54 interaction domain, ATP-binding site 1 [IPRO25662] (1); Small GTPase superfamily, Rab type [IPRO03579] (1); Small GTPase superfamily, Ras type [IPRO20849] (1) | -                               | -                            | P_trifoliata_00224_mRNA_11.1    |
| GF0046931 | 0                            | 0                         | 1                            | Hypothetical protein (1)                                 |                                                                                                                                                                                                                                                                                                                                                                                                                                                                                                                                           |                                                                                                                                                                                                                                                                                                                                                                                                                          | -                               | -                            | P_trifoliata_00223_mRNA_6.1     |
| GF0046930 | 0                            | 0                         | 1                            | Hypothetical protein (1)                                 |                                                                                                                                                                                                                                                                                                                                                                                                                                                                                                                                           |                                                                                                                                                                                                                                                                                                                                                                                                                          | -                               | -                            | P_trifoliata_00223_mRNA_35.1    |
| GF0046929 | 0                            | 0                         | 1                            | Hypothetical protein (1)                                 |                                                                                                                                                                                                                                                                                                                                                                                                                                                                                                                                           |                                                                                                                                                                                                                                                                                                                                                                                                                          | -                               | -                            | P_trifoliata_00223_mRNA_32.1    |
| GF0046928 | 0                            | 0                         | 1                            | Hypothetical protein (1)                                 | ADP binding [GO:0043531 molecular_function] (1)                                                                                                                                                                                                                                                                                                                                                                                                                                                                                           | P-loop containing nucleoside triphosphate hydrolase [IPRO27417] (1); GPN-loop GTPase [IPRO04130] (1); NB-ARC [IPRO02182] (1)                                                                                                                                                                                                                                                                                             | -                               | -                            | P_trifoliata_00223_mRNA_27.1    |
| GF0046927 | 0                            | 0                         | 1                            | Hypothetical protein (1)                                 |                                                                                                                                                                                                                                                                                                                                                                                                                                                                                                                                           |                                                                                                                                                                                                                                                                                                                                                                                                                          | -                               | -                            | P_trifoliata_00223_mRNA_25.1    |
| GF0046926 | 0                            | 0                         | 1                            | Hypothetical protein (1)                                 |                                                                                                                                                                                                                                                                                                                                                                                                                                                                                                                                           |                                                                                                                                                                                                                                                                                                                                                                                                                          | -                               | -                            | P_trifoliata_00223_mRNA_21.1    |
| GF0046925 | 0                            | 0                         | 1                            | Hypothetical protein (1)                                 |                                                                                                                                                                                                                                                                                                                                                                                                                                                                                                                                           |                                                                                                                                                                                                                                                                                                                                                                                                                          | -                               | -                            | P_trifoliata_00223_mRNA_20.1    |
| GF0046924 | 0                            | 0                         | 1                            | Hypothetical protein (1)                                 |                                                                                                                                                                                                                                                                                                                                                                                                                                                                                                                                           |                                                                                                                                                                                                                                                                                                                                                                                                                          | -                               | -                            | P_trifoliata_00223_mRNA_19.1    |
| GF0046923 | 0                            | 0                         | 1                            | Hypothetical protein (1)                                 | translational elongation [GO:0006414 biological_process] (1); translation elongation factor activity [GO:0003746 molecular_function] (1)                                                                                                                                                                                                                                                                                                                                                                                                  | Translation elongation factor EF1B, gamma chain, conserved [IPRO11662] (1)                                                                                                                                                                                                                                                                                                                                               | -                               | -                            | P_trifoliata_00223_mRNA_17.1    |
| GF0046922 | 0                            | 0                         | 1                            | Hypothetical protein (1)                                 |                                                                                                                                                                                                                                                                                                                                                                                                                                                                                                                                           |                                                                                                                                                                                                                                                                                                                                                                                                                          | -                               | -                            | P_trifoliata_00223_mRNA_12.1    |
| GF0046921 | 0                            | 0                         | 1                            | Hypothetical protein (1)                                 |                                                                                                                                                                                                                                                                                                                                                                                                                                                                                                                                           |                                                                                                                                                                                                                                                                                                                                                                                                                          | -                               | -                            | P_trifoliata_00223_mRNA_11.1    |
| GF0046920 | 0                            | 0                         | 1                            | Hypothetical protein (1)                                 |                                                                                                                                                                                                                                                                                                                                                                                                                                                                                                                                           |                                                                                                                                                                                                                                                                                                                                                                                                                          | -                               | -                            | P_trifoliata_00223_mRNA_10.1    |
| GF0046919 | 0                            | 0                         | 1                            | Putative non-4,TR retroelement reverse transcriptase (1) |                                                                                                                                                                                                                                                                                                                                                                                                                                                                                                                                           | Reverse transcriptase zinc-binding domain [IPRO26960] (1)                                                                                                                                                                                                                                                                                                                                                                | -                               | -                            | P_trifoliata_00222_mRNA_6.1     |
| GF0046918 | 0                            | 0                         | 1                            | Hypothetical protein (1)                                 |                                                                                                                                                                                                                                                                                                                                                                                                                                                                                                                                           |                                                                                                                                                                                                                                                                                                                                                                                                                          | -                               | -                            | P_trifoliata_00222_mRNA_43.1    |
| GF0046917 | 0                            | 0                         | 1                            | Hypothetical protein (1)                                 |                                                                                                                                                                                                                                                                                                                                                                                                                                                                                                                                           |                                                                                                                                                                                                                                                                                                                                                                                                                          | -                               | -                            | P_trifoliata_00222_mRNA_41.1    |
| GF0046916 | 0                            | 0                         | 1                            | Hypothetical protein (1)                                 |                                                                                                                                                                                                                                                                                                                                                                                                                                                                                                                                           |                                                                                                                                                                                                                                                                                                                                                                                                                          | -                               | -                            | P_trifoliata_00222_mRNA_40.1    |
| GF0046915 | 0                            | 0                         | 1                            | Hypothetical protein (1)                                 |                                                                                                                                                                                                                                                                                                                                                                                                                                                                                                                                           |                                                                                                                                                                                                                                                                                                                                                                                                                          | -                               | -                            | P_trifoliata_00222_mRNA_38.1    |
| GF0046914 | 0                            | 0                         | 1                            | Hypothetical protein (1)                                 | peptidyl-prolyl cis-trans isomerase activity [GO:0003755 molecular_function] (1); protein folding [GO:0006457 biological_process] (1)                                                                                                                                                                                                                                                                                                                                                                                                     | Cyclophilin-type peptidyl-prolyl cis-trans isomerase [IPRO24956] (1); Cyclophilin-like domain [IPRO29000] (1)                                                                                                                                                                                                                                                                                                            | -                               | -                            | P_trifoliata_00222_mRNA_33.1    |
| GF0046913 | 0                            | 0                         | 1                            | Hypothetical protein (1)                                 |                                                                                                                                                                                                                                                                                                                                                                                                                                                                                                                                           |                                                                                                                                                                                                                                                                                                                                                                                                                          | -                               | -                            | P_trifoliata_00222_mRNA_31.1    |
| GF0046912 | 0                            | 0                         | 1                            | Hypothetical protein (1)                                 | nucleic acid binding [GO:0003676 molecular_function] (1); zinc ion binding [GO:0008270 molecular_function] (1)                                                                                                                                                                                                                                                                                                                                                                                                                            | Zinc finger, CCHC-type [IPRO01878] (1)                                                                                                                                                                                                                                                                                                                                                                                   | -                               | -                            | P_trifoliata_00222_mRNA_30.1    |
| GF0046911 | 0                            | 0                         | 1                            | Hypothetical protein (1)                                 |                                                                                                                                                                                                                                                                                                                                                                                                                                                                                                                                           |                                                                                                                                                                                                                                                                                                                                                                                                                          | -                               | -                            | P_trifoliata_00222_mRNA_26.1    |
| GF0046910 | 0                            | 0                         | 1                            | Hypothetical protein (1)                                 |                                                                                                                                                                                                                                                                                                                                                                                                                                                                                                                                           |                                                                                                                                                                                                                                                                                                                                                                                                                          | -                               | -                            | P_trifoliata_00222_mRNA_25.1    |
| GF0046909 | 0                            | 0                         | 1                            | Hypothetical protein (1)                                 |                                                                                                                                                                                                                                                                                                                                                                                                                                                                                                                                           |                                                                                                                                                                                                                                                                                                                                                                                                                          | -                               | -                            | P_trifoliata_00222_mRNA_21.1    |
| GF0046908 | 0                            | 0                         | 1                            | Hypothetical protein (1)                                 |                                                                                                                                                                                                                                                                                                                                                                                                                                                                                                                                           |                                                                                                                                                                                                                                                                                                                                                                                                                          | -                               | -                            | P_trifoliata_00222_mRNA_20.1    |
| GF0046907 | 0                            | 0                         | 1                            | Hypothetical protein (1)                                 |                                                                                                                                                                                                                                                                                                                                                                                                                                                                                                                                           |                                                                                                                                                                                                                                                                                                                                                                                                                          | -                               | -                            | P_trifoliata_00222_mRNA_19.1    |
| GF0046906 | 0                            | 0                         | 1                            | Hypothetical protein (1)                                 |                                                                                                                                                                                                                                                                                                                                                                                                                                                                                                                                           |                                                                                                                                                                                                                                                                                                                                                                                                                          | -                               | -                            | P_trifoliata_00222_mRNA_12.1    |
| GF0046905 | 0                            | 0                         | 1                            | Somatic embryogenesis receptor kinase 1 (1)              |                                                                                                                                                                                                                                                                                                                                                                                                                                                                                                                                           | Leucine-rich repeat domain, L domain-like [IPRO32675] (1); Leucine-rich repeat-containing N-terminal, plant-type [IPRO13210] (1)                                                                                                                                                                                                                                                                                         | -                               | -                            | P_trifoliata_00221_mRNA_5.1     |
| GF0046904 | 0                            | 0                         | 1                            | Hypothetical protein (1)                                 |                                                                                                                                                                                                                                                                                                                                                                                                                                                                                                                                           |                                                                                                                                                                                                                                                                                                                                                                                                                          | -                               | -                            | P_trifoliata_00221_mRNA_41.1    |
| GF0046903 | 0                            | 0                         | 1                            | Hypothetical protein (1)                                 |                                                                                                                                                                                                                                                                                                                                                                                                                                                                                                                                           |                                                                                                                                                                                                                                                                                                                                                                                                                          | -                               | -                            | P_trifoliata_00221_mRNA_40.1    |
| GF0046902 | 0                            | 0                         | 1                            | Hypothetical protein (1)                                 |                                                                                                                                                                                                                                                                                                                                                                                                                                                                                                                                           | MULE transposase domain [IPRO18289] (1)                                                                                                                                                                                                                                                                                                                                                                                  | -                               | -                            | P_trifoliata_00221_mRNA_38.1    |
| GF0046901 | 0                            | 0                         | 1                            | Hypothetical protein (1)                                 |                                                                                                                                                                                                                                                                                                                                                                                                                                                                                                                                           |                                                                                                                                                                                                                                                                                                                                                                                                                          | -                               | -                            | P_trifoliata_00221_mRNA_37.1    |
| GF0046900 | 0                            | 0                         | 1                            | Transcription factor (E2F) (1)                           | transcription factor activity, sequence-specific DNA binding [GO:0003700 molecular_function] (1); regulation of transcription, DNA-templated [GO:0006355 biological_process] (1); transcription factor complex [GO:0005667 cellular_component] (1)                                                                                                                                                                                                                                                                                        | E2F/DP family, winged-helix DNA-binding domain [IPRO03316] (1); E2F transcription factor, CC-MB domain [IPRO32198] (1); Winged helix-helix DNA-binding domain [IPRO11991] (1); E2F Family [IPRO15633] (1)                                                                                                                                                                                                                | -                               | -                            | P_trifoliata_00221_mRNA_17.1    |
| GF0046899 | 0                            | 0                         | 1                            | Hypothetical protein (1)                                 |                                                                                                                                                                                                                                                                                                                                                                                                                                                                                                                                           |                                                                                                                                                                                                                                                                                                                                                                                                                          | -                               | -                            | P_trifoliata_00220_mRNA_8.1     |
| GF0046898 | 0                            | 0                         | 1                            | Hypothetical protein (1)                                 |                                                                                                                                                                                                                                                                                                                                                                                                                                                                                                                                           |                                                                                                                                                                                                                                                                                                                                                                                                                          | -                               | -                            | P_trifoliata_00220_mRNA_6.1     |
| GF0046897 | 0                            | 0                         | 1                            | Hypothetical protein (1)                                 | membrane [GO:0016020 cellular_component] (1)                                                                                                                                                                                                                                                                                                                                                                                                                                                                                              | Calcium permeable stress-gated cation channel 1, N-terminal transmembrane domain [IPRO33890] (1); Calcium dependent channel, 7TM region, putative phosphate [IPRO03864] (1); 10TM putative phosphate transporter, cytosolic domain [IPRO27815] (1)                                                                                                                                                                       | -                               | -                            | P_trifoliata_00220_mRNA_40.1    |
| GF0046896 | 0                            | 0                         | 1                            | Hypothetical protein (1)                                 |                                                                                                                                                                                                                                                                                                                                                                                                                                                                                                                                           |                                                                                                                                                                                                                                                                                                                                                                                                                          | -                               | -                            | P_trifoliata_00220_mRNA_4.1     |
| GF0046895 | 0                            | 0                         | 1                            | Hypothetical protein (1)                                 |                                                                                                                                                                                                                                                                                                                                                                                                                                                                                                                                           |                                                                                                                                                                                                                                                                                                                                                                                                                          | -                               | -                            | P_trifoliata_00220_mRNA_3.1     |
| GF0046894 | 0                            | 0                         | 1                            | Hypothetical protein (1)                                 |                                                                                                                                                                                                                                                                                                                                                                                                                                                                                                                                           |                                                                                                                                                                                                                                                                                                                                                                                                                          | -                               | -                            | P_trifoliata_00220_mRNA_25.1    |
| GF0046893 | 0                            | 0                         | 1                            | Cyclic nucleotide-gated ion channel 2 (1)                |                                                                                                                                                                                                                                                                                                                                                                                                                                                                                                                                           | Cyclic nucleotide-binding domain [IPRO08593] (1); Cyclic nucleotide-binding-like [IPRO18490] (1); RasC-like jelly roll fold [IPRO14710] (1)                                                                                                                                                                                                                                                                              | -                               | -                            | P_trifoliata_00220_mRNA_21.1    |
| GF0046892 | 0                            | 0                         | 1                            | Hypothetical protein (1)                                 |                                                                                                                                                                                                                                                                                                                                                                                                                                                                                                                                           |                                                                                                                                                                                                                                                                                                                                                                                                                          | -                               | -                            | P_trifoliata_00220_mRNA_20.2    |
| GF0046891 | 0                            | 0                         | 1                            | Hypothetical protein (1)                                 |                                                                                                                                                                                                                                                                                                                                                                                                                                                                                                                                           |                                                                                                                                                                                                                                                                                                                                                                                                                          | -                               | -                            | P_trifoliata_00220_mRNA_19.1    |
| GF0046890 | 0                            | 0                         | 1                            | Hypothetical protein (1)                                 |                                                                                                                                                                                                                                                                                                                                                                                                                                                                                                                                           |                                                                                                                                                                                                                                                                                                                                                                                                                          | -                               | -                            | P_trifoliata_00220_mRNA_18.1    |
| GF0046889 | 0                            | 0                         | 1                            | Hypothetical protein (1)                                 |                                                                                                                                                                                                                                                                                                                                                                                                                                                                                                                                           |                                                                                                                                                                                                                                                                                                                                                                                                                          | -                               | -                            | P_trifoliata_00220_mRNA_16.1    |
| GF0046888 | 0                            | 0                         | 1                            | Hypothetical protein (1)                                 |                                                                                                                                                                                                                                                                                                                                                                                                                                                                                                                                           |                                                                                                                                                                                                                                                                                                                                                                                                                          | -                               | -                            | P_trifoliata_00220_mRNA_14.1    |

| ID        | Num. in <i>C. clementiae</i> | Num. in <i>C. unshii</i> | Num. in <i>P. trifoliata</i> | Note                                                           | GO                                                                                                                                                                                                                                                                                                                                                                                                                                                            | InterPro                                                                                                                                                                                                                                                                                                                                                                                                                                                                                                                                                                                                                 | Members in <i>C. clementiae</i> | Members in <i>C. unshii</i> | Members in <i>P. trifoliata</i> |
|-----------|------------------------------|--------------------------|------------------------------|----------------------------------------------------------------|---------------------------------------------------------------------------------------------------------------------------------------------------------------------------------------------------------------------------------------------------------------------------------------------------------------------------------------------------------------------------------------------------------------------------------------------------------------|--------------------------------------------------------------------------------------------------------------------------------------------------------------------------------------------------------------------------------------------------------------------------------------------------------------------------------------------------------------------------------------------------------------------------------------------------------------------------------------------------------------------------------------------------------------------------------------------------------------------------|---------------------------------|-----------------------------|---------------------------------|
| GF0046887 | 0                            | 0                        | 1                            | Ulp1 protease family, carboxy-terminal domain protein (1)      | cysteine-type peptidase activity [GO:0008224 molecular_function] (1); proteolysis [GO:0006508 biological_process] (1)                                                                                                                                                                                                                                                                                                                                         | Ulp1 protease family, C-terminal catalytic domain [IPRO03653] (1)                                                                                                                                                                                                                                                                                                                                                                                                                                                                                                                                                        | -                               | -                           | P_trifoliata_00220_mRNA_12.1    |
| GF0046886 | 0                            | 0                        | 1                            | Hypothetical protein (1)                                       |                                                                                                                                                                                                                                                                                                                                                                                                                                                               | Serine/threonine-protein kinase, active site [IPRO8271] (1); Chitinase insertion domain [IPRO29070] (1); Glycoside hydrolase family 18, catalytic domain [IPRO1225] (1); Serine/threonine/dial specificity protein kinase, catalytic domain [IPRO02290] (1); Serine/threonine/tyrosine-protein kinase catalytic domain [IPRO1245] (1); Chitinase II [IPRO11583] (1); Protein kinase domain [IPRO00719] (1); Protein kinase-like domain [IPRO11009] (1); Glycoside hydrolase superfamily [IPRO17853] (1); Concavalin A-like lectin/glucanase domain [IPRO1320] (1); Glycoside hydrolase, catalytic domain [IPRO13781] (1) | -                               | -                           | P_trifoliata_00220_mRNA_10.1    |
| GF0046885 | 0                            | 0                        | 1                            | Hypothetical protein (1)                                       | chitin catabolic process [GO:0006032 biological_process] (1); chitinase activity [GO:0004588 molecular_function] (1); carbohydrate metabolic process [GO:0005975 biological_process] (1); hydrolase activity, hydrolyzing O-glycosyl compounds [GO:0004553 molecular_function] (1); ATP binding [GO:0005524 molecular_function] (1); protein kinase activity [GO:0004672 molecular_function] (1); protein phosphorylation [GO:0006468 biological_process] (1) |                                                                                                                                                                                                                                                                                                                                                                                                                                                                                                                                                                                                                          | -                               | -                           | P_trifoliata_00220_mRNA_1.1     |
| GF0046884 | 0                            | 0                        | 1                            | Hypothetical protein (1)                                       |                                                                                                                                                                                                                                                                                                                                                                                                                                                               | Leucine-rich repeat domain, L domain-like [IPRO32675] (1); Peptidase M28 [IPRO07484] (1)                                                                                                                                                                                                                                                                                                                                                                                                                                                                                                                                 | -                               | -                           | P_trifoliata_00219_mRNA_7.1     |
| GF0046883 | 0                            | 0                        | 1                            | LRR receptor-like serine/threonine-protein kinase ERL2 (1)     | protein binding [GO:0005515 molecular_function] (1)                                                                                                                                                                                                                                                                                                                                                                                                           | Leucine-rich repeat, typical subtype [IPRO03591] (1); Leucine-rich repeat domain, L domain-like [IPRO32675] (1)                                                                                                                                                                                                                                                                                                                                                                                                                                                                                                          | -                               | -                           | P_trifoliata_00219_mRNA_6.1     |
| GF0046882 | 0                            | 0                        | 1                            | Hypothetical protein (1)                                       |                                                                                                                                                                                                                                                                                                                                                                                                                                                               | Leucine-rich repeat [IPRO01611] (1);                                                                                                                                                                                                                                                                                                                                                                                                                                                                                                                                                                                     | -                               | -                           | P_trifoliata_00219_mRNA_31.1    |
| GF0046881 | 0                            | 0                        | 1                            | Hypothetical protein (1)                                       |                                                                                                                                                                                                                                                                                                                                                                                                                                                               | Leucine-rich repeat, typical subtype [IPRO03591] (1); Leucine-rich repeat domain, L domain-like [IPRO32675] (1)                                                                                                                                                                                                                                                                                                                                                                                                                                                                                                          | -                               | -                           | P_trifoliata_00219_mRNA_29.1    |
| GF0046880 | 0                            | 0                        | 1                            | Hypothetical protein (1)                                       |                                                                                                                                                                                                                                                                                                                                                                                                                                                               | Protein kinase-like domain [IPRO11009] (1)                                                                                                                                                                                                                                                                                                                                                                                                                                                                                                                                                                               | -                               | -                           | P_trifoliata_00219_mRNA_28.1    |
| GF0046879 | 0                            | 0                        | 1                            | Hypothetical protein (1)                                       |                                                                                                                                                                                                                                                                                                                                                                                                                                                               |                                                                                                                                                                                                                                                                                                                                                                                                                                                                                                                                                                                                                          | -                               | -                           | P_trifoliata_00219_mRNA_25.1    |
| GF0046878 | 0                            | 0                        | 1                            | Hypothetical protein (1)                                       |                                                                                                                                                                                                                                                                                                                                                                                                                                                               |                                                                                                                                                                                                                                                                                                                                                                                                                                                                                                                                                                                                                          | -                               | -                           | P_trifoliata_00219_mRNA_23.1    |
| GF0046877 | 0                            | 0                        | 1                            | Hypothetical protein (1)                                       |                                                                                                                                                                                                                                                                                                                                                                                                                                                               |                                                                                                                                                                                                                                                                                                                                                                                                                                                                                                                                                                                                                          | -                               | -                           | P_trifoliata_00219_mRNA_20.1    |
| GF0046876 | 0                            | 0                        | 1                            | Hypothetical protein (1)                                       |                                                                                                                                                                                                                                                                                                                                                                                                                                                               |                                                                                                                                                                                                                                                                                                                                                                                                                                                                                                                                                                                                                          | -                               | -                           | P_trifoliata_00219_mRNA_18.1    |
| GF0046875 | 0                            | 0                        | 1                            | Hypothetical protein (1)                                       |                                                                                                                                                                                                                                                                                                                                                                                                                                                               |                                                                                                                                                                                                                                                                                                                                                                                                                                                                                                                                                                                                                          | -                               | -                           | P_trifoliata_00219_mRNA_17.1    |
| GF0046874 | 0                            | 0                        | 1                            | Gamma-glutamyl hydrolase 2 (1)                                 | catalytic activity [GO:0003824 molecular_function] (1); omega peptidase activity [GO:0008242 molecular_function] (1); glutamine metabolic process [GO:0006541 biological_process] (1)                                                                                                                                                                                                                                                                         | Peptidase C26, gamma-glutamyl hydrolase [IPRO15527] (1); Class I glutamine amidotransferase-like [IPRO29062] (1); Glutamine amidotransferase [IPRO17926] (1)                                                                                                                                                                                                                                                                                                                                                                                                                                                             | -                               | -                           | P_trifoliata_00219_mRNA_10.1    |
| GF0046873 | 0                            | 0                        | 1                            | Hypothetical protein (1)                                       |                                                                                                                                                                                                                                                                                                                                                                                                                                                               |                                                                                                                                                                                                                                                                                                                                                                                                                                                                                                                                                                                                                          | -                               | -                           | P_trifoliata_00219_mRNA_1.1     |
| GF0046872 | 0                            | 0                        | 1                            | Hypothetical protein (1)                                       |                                                                                                                                                                                                                                                                                                                                                                                                                                                               |                                                                                                                                                                                                                                                                                                                                                                                                                                                                                                                                                                                                                          | -                               | -                           | P_trifoliata_00218_mRNA_60.1    |
| GF0046871 | 0                            | 0                        | 1                            | Hypothetical protein (1)                                       |                                                                                                                                                                                                                                                                                                                                                                                                                                                               |                                                                                                                                                                                                                                                                                                                                                                                                                                                                                                                                                                                                                          | -                               | -                           | P_trifoliata_00218_mRNA_59.1    |
| GF0046870 | 0                            | 0                        | 1                            | Hypothetical protein (1)                                       |                                                                                                                                                                                                                                                                                                                                                                                                                                                               |                                                                                                                                                                                                                                                                                                                                                                                                                                                                                                                                                                                                                          | -                               | -                           | P_trifoliata_00218_mRNA_57.1    |
| GF0046869 | 0                            | 0                        | 1                            | Hypothetical protein (1)                                       |                                                                                                                                                                                                                                                                                                                                                                                                                                                               |                                                                                                                                                                                                                                                                                                                                                                                                                                                                                                                                                                                                                          | -                               | -                           | P_trifoliata_00218_mRNA_52.1    |
| GF0046868 | 0                            | 0                        | 1                            | Hypothetical protein (1)                                       |                                                                                                                                                                                                                                                                                                                                                                                                                                                               |                                                                                                                                                                                                                                                                                                                                                                                                                                                                                                                                                                                                                          | -                               | -                           | P_trifoliata_00218_mRNA_50.1    |
| GF0046867 | 0                            | 0                        | 1                            | Hypothetical protein (1)                                       |                                                                                                                                                                                                                                                                                                                                                                                                                                                               |                                                                                                                                                                                                                                                                                                                                                                                                                                                                                                                                                                                                                          | -                               | -                           | P_trifoliata_00218_mRNA_49.1    |
| GF0046866 | 0                            | 0                        | 1                            | Hypothetical protein (1)                                       | transcription factor activity, sequence-specific DNA binding [GO:0003700 molecular_function] (1); regulation of transcription, DNA-templated [GO:0006355 biological_process] (1); sequence-specific DNA binding [GO:0043565 molecular_function] (1)                                                                                                                                                                                                           | WRKY domain [IPRO03657] (1)                                                                                                                                                                                                                                                                                                                                                                                                                                                                                                                                                                                              | -                               | -                           | P_trifoliata_00218_mRNA_43.1    |
| GF0046865 | 0                            | 0                        | 1                            | Hypothetical protein (1)                                       | transcription factor activity, sequence-specific DNA binding [GO:0003700 molecular_function] (1); regulation of transcription, DNA-templated [GO:0006355 biological_process] (1); DNA binding [GO:0005677 molecular_function] (1)                                                                                                                                                                                                                             | AP2/ERF domain [IPRO01471] (1); DNA-binding domain [IPRO16177] (1)                                                                                                                                                                                                                                                                                                                                                                                                                                                                                                                                                       | -                               | -                           | P_trifoliata_00218_mRNA_40.1    |
| GF0046864 | 0                            | 0                        | 1                            | Ethylene-responsive transcription factor 2 (1)                 | transcription factor activity, sequence-specific DNA binding [GO:0003700 molecular_function] (1); regulation of transcription, DNA-templated [GO:0006355 biological_process] (1); DNA binding [GO:0005677 molecular_function] (1)                                                                                                                                                                                                                             | DNA-binding domain [IPRO16177] (1); AP2/ERF domain [IPRO01471] (1)                                                                                                                                                                                                                                                                                                                                                                                                                                                                                                                                                       | -                               | -                           | P_trifoliata_00218_mRNA_39.1    |
| GF0046863 | 0                            | 0                        | 1                            | Hypothetical protein (1)                                       | ubiquitin-protein transferase activity [GO:0004842 molecular_function] (1); protein ubiquitination [GO:0016567 biological_process] (1)                                                                                                                                                                                                                                                                                                                        | E3 ubiquitin ligase RBR family [IPRO31127] (1); Zinc finger, RING/YVYE/PHD-type [IPRO13083] (1)                                                                                                                                                                                                                                                                                                                                                                                                                                                                                                                          | -                               | -                           | P_trifoliata_00218_mRNA_36.1    |
| GF0046862 | 0                            | 0                        | 1                            | Hypothetical protein (1)                                       |                                                                                                                                                                                                                                                                                                                                                                                                                                                               |                                                                                                                                                                                                                                                                                                                                                                                                                                                                                                                                                                                                                          | -                               | -                           | P_trifoliata_00218_mRNA_30.1    |
| GF0046861 | 0                            | 0                        | 1                            | Hypothetical protein (1)                                       |                                                                                                                                                                                                                                                                                                                                                                                                                                                               |                                                                                                                                                                                                                                                                                                                                                                                                                                                                                                                                                                                                                          | -                               | -                           | P_trifoliata_00218_mRNA_29.1    |
| GF0046860 | 0                            | 0                        | 1                            | Hypothetical protein (1)                                       |                                                                                                                                                                                                                                                                                                                                                                                                                                                               |                                                                                                                                                                                                                                                                                                                                                                                                                                                                                                                                                                                                                          | -                               | -                           | P_trifoliata_00218_mRNA_26.1    |
| GF0046859 | 0                            | 0                        | 1                            | Hypothetical protein (1)                                       |                                                                                                                                                                                                                                                                                                                                                                                                                                                               |                                                                                                                                                                                                                                                                                                                                                                                                                                                                                                                                                                                                                          | -                               | -                           | P_trifoliata_00218_mRNA_24.1    |
| GF0046858 | 0                            | 0                        | 1                            | Hypothetical protein (1)                                       |                                                                                                                                                                                                                                                                                                                                                                                                                                                               |                                                                                                                                                                                                                                                                                                                                                                                                                                                                                                                                                                                                                          | -                               | -                           | P_trifoliata_00218_mRNA_20.1    |
| GF0046857 | 0                            | 0                        | 1                            | Hypothetical protein (1)                                       |                                                                                                                                                                                                                                                                                                                                                                                                                                                               |                                                                                                                                                                                                                                                                                                                                                                                                                                                                                                                                                                                                                          | -                               | -                           | P_trifoliata_00218_mRNA_19.1    |
| GF0046856 | 0                            | 0                        | 1                            | Putative DNA-directed RNA polymerase III subunit RPB3-like (1) | regulation of transcription from RNA polymerase III promoter [GO:0006159 biological_process] (1)                                                                                                                                                                                                                                                                                                                                                              | DNA-directed RNA polymerase III, subunit Rpb3 [IPRO24661] (1)                                                                                                                                                                                                                                                                                                                                                                                                                                                                                                                                                            | -                               | -                           | P_trifoliata_00218_mRNA_10.1    |
| GF0046855 | 0                            | 0                        | 1                            | Hypothetical protein (1)                                       |                                                                                                                                                                                                                                                                                                                                                                                                                                                               |                                                                                                                                                                                                                                                                                                                                                                                                                                                                                                                                                                                                                          | -                               | -                           | P_trifoliata_00217_mRNA_8.1     |
| GF0046854 | 0                            | 0                        | 1                            | Hypothetical protein (1)                                       | integral component of membrane [GO:0016021 cellular_component] (1)                                                                                                                                                                                                                                                                                                                                                                                            | Integral membrane protein TerC [IPRO05490] (1); Integral membrane protein TerC, riboswitch-linked [IPRO22369] (1)                                                                                                                                                                                                                                                                                                                                                                                                                                                                                                        | -                               | -                           | P_trifoliata_00217_mRNA_37.1    |
| GF0046853 | 0                            | 0                        | 1                            | Hypothetical protein (1)                                       |                                                                                                                                                                                                                                                                                                                                                                                                                                                               |                                                                                                                                                                                                                                                                                                                                                                                                                                                                                                                                                                                                                          | -                               | -                           | P_trifoliata_00217_mRNA_36.1    |
| GF0046852 | 0                            | 0                        | 1                            | Hypothetical protein (1)                                       |                                                                                                                                                                                                                                                                                                                                                                                                                                                               |                                                                                                                                                                                                                                                                                                                                                                                                                                                                                                                                                                                                                          | -                               | -                           | P_trifoliata_00217_mRNA_31.1    |
| GF0046851 | 0                            | 0                        | 1                            | Hypothetical protein (1)                                       |                                                                                                                                                                                                                                                                                                                                                                                                                                                               |                                                                                                                                                                                                                                                                                                                                                                                                                                                                                                                                                                                                                          | -                               | -                           | P_trifoliata_00217_mRNA_30.1    |
| GF0046850 | 0                            | 0                        | 1                            | Hypothetical protein (1)                                       |                                                                                                                                                                                                                                                                                                                                                                                                                                                               |                                                                                                                                                                                                                                                                                                                                                                                                                                                                                                                                                                                                                          | -                               | -                           | P_trifoliata_00217_mRNA_2.1     |
| GF0046849 | 0                            | 0                        | 1                            | Hypothetical protein (1)                                       |                                                                                                                                                                                                                                                                                                                                                                                                                                                               |                                                                                                                                                                                                                                                                                                                                                                                                                                                                                                                                                                                                                          | -                               | -                           | P_trifoliata_00217_mRNA_19.1    |
| GF0046848 | 0                            | 0                        | 1                            | Hypothetical protein (1)                                       |                                                                                                                                                                                                                                                                                                                                                                                                                                                               |                                                                                                                                                                                                                                                                                                                                                                                                                                                                                                                                                                                                                          | -                               | -                           | P_trifoliata_00217_mRNA_17.1    |
| GF0046847 | 0                            | 0                        | 1                            | Hypothetical protein (1)                                       |                                                                                                                                                                                                                                                                                                                                                                                                                                                               |                                                                                                                                                                                                                                                                                                                                                                                                                                                                                                                                                                                                                          | -                               | -                           | P_trifoliata_00217_mRNA_16.1    |
| GF0046846 | 0                            | 0                        | 1                            | Hypothetical protein (1)                                       |                                                                                                                                                                                                                                                                                                                                                                                                                                                               |                                                                                                                                                                                                                                                                                                                                                                                                                                                                                                                                                                                                                          | -                               | -                           | P_trifoliata_00217_mRNA_15.1    |
| GF0046845 | 0                            | 0                        | 1                            | Hypothetical protein (1)                                       |                                                                                                                                                                                                                                                                                                                                                                                                                                                               |                                                                                                                                                                                                                                                                                                                                                                                                                                                                                                                                                                                                                          | -                               | -                           | P_trifoliata_00217_mRNA_14.1    |
| GF0046844 | 0                            | 0                        | 1                            | Hypothetical protein (1)                                       |                                                                                                                                                                                                                                                                                                                                                                                                                                                               |                                                                                                                                                                                                                                                                                                                                                                                                                                                                                                                                                                                                                          | -                               | -                           | P_trifoliata_00217_mRNA_1.1     |
| GF0046843 | 0                            | 0                        | 1                            | Hypothetical protein (1)                                       |                                                                                                                                                                                                                                                                                                                                                                                                                                                               |                                                                                                                                                                                                                                                                                                                                                                                                                                                                                                                                                                                                                          | -                               | -                           | P_trifoliata_00216_mRNA_9.1     |
| GF0046842 | 0                            | 0                        | 1                            | Hypothetical protein (1)                                       | metabolic process [GO:0008152 biological_process] (1); membrane [GO:0016020 cellular_component] (1); fatty acid biosynthetic process [GO:0006533 biological_process] (1); transferase activity, transferring acyl groups, other than amino-acyl groups [GO:0016747 molecular_function] (1); catalytic activity [GO:0003824 molecular_function] (1)                                                                                                            | Thiolase-like [IPRO16039] (1); Very-long-chain 3-oxoacyl-CoA synthase [IPRO12392] (1); FAEI/Type III polyketide synthase-like protein [IPRO13601] (1)                                                                                                                                                                                                                                                                                                                                                                                                                                                                    | -                               | -                           | P_trifoliata_00216_mRNA_5.1     |
| GF0046841 | 0                            | 0                        | 1                            | Hypothetical protein (1)                                       |                                                                                                                                                                                                                                                                                                                                                                                                                                                               |                                                                                                                                                                                                                                                                                                                                                                                                                                                                                                                                                                                                                          | -                               | -                           | P_trifoliata_00216_mRNA_3.1     |
| GF0046840 | 0                            | 0                        | 1                            | Hypothetical protein (1)                                       |                                                                                                                                                                                                                                                                                                                                                                                                                                                               |                                                                                                                                                                                                                                                                                                                                                                                                                                                                                                                                                                                                                          | -                               | -                           | P_trifoliata_00216_mRNA_26.1    |
| GF0046839 | 0                            | 0                        | 1                            | Hypothetical protein (1)                                       |                                                                                                                                                                                                                                                                                                                                                                                                                                                               |                                                                                                                                                                                                                                                                                                                                                                                                                                                                                                                                                                                                                          | -                               | -                           | P_trifoliata_00216_mRNA_24.1    |
| GF0046838 | 0                            | 0                        | 1                            | Hypothetical protein (1)                                       |                                                                                                                                                                                                                                                                                                                                                                                                                                                               |                                                                                                                                                                                                                                                                                                                                                                                                                                                                                                                                                                                                                          | -                               | -                           | P_trifoliata_00216_mRNA_23.1    |
| GF0046837 | 0                            | 0                        | 1                            | Hypothetical protein (1)                                       |                                                                                                                                                                                                                                                                                                                                                                                                                                                               |                                                                                                                                                                                                                                                                                                                                                                                                                                                                                                                                                                                                                          | -                               | -                           | P_trifoliata_00216_mRNA_18.1    |
| GF0046836 | 0                            | 0                        | 1                            | Hypothetical protein (1)                                       | ATP binding [GO:0005524 molecular_function] (1); ATPase activity [GO:0016887 molecular_function] (1)                                                                                                                                                                                                                                                                                                                                                          | Arsenical pump ATPase, Arsa/GET3 [IPRO16300] (1)                                                                                                                                                                                                                                                                                                                                                                                                                                                                                                                                                                         | -                               | -                           | P_trifoliata_00216_mRNA_14.1    |
| GF0046835 | 0                            | 0                        | 1                            | Hypothetical protein (1)                                       | cysteine-type peptidase activity [GO:0008224 molecular_function] (1); proteolysis [GO:0006508 biological_process] (1)                                                                                                                                                                                                                                                                                                                                         | Ulp1 protease family, C-terminal catalytic domain [IPRO03653] (1)                                                                                                                                                                                                                                                                                                                                                                                                                                                                                                                                                        | -                               | -                           | P_trifoliata_00216_mRNA_10.1    |
| GF0046834 | 0                            | 0                        | 1                            | IQ calmodulin-binding motif protein (1)                        | protein binding [GO:0005515 molecular_function] (1)                                                                                                                                                                                                                                                                                                                                                                                                           | r-loop containing nucleoside triphosphate hydrolase [IPRO27417] (1); IQ motif, EF-hand binding site [IPRO04841 r.v.]; Retic-like jelly roll fold [IPRO14710] (1); Retic-like cupin domain [IPRO11051] (1)                                                                                                                                                                                                                                                                                                                                                                                                                | -                               | -                           | P_trifoliata_00215_mRNA_43.1    |
| GF0046833 | 0                            | 0                        | 1                            | Hypothetical protein (1)                                       |                                                                                                                                                                                                                                                                                                                                                                                                                                                               |                                                                                                                                                                                                                                                                                                                                                                                                                                                                                                                                                                                                                          | -                               | -                           | P_trifoliata_00215_mRNA_3.1     |
| GF0046832 | 0                            | 0                        | 1                            | Pto kinase interactor (1)                                      | protein kinase activity [GO:0004672 molecular_function] (1); protein phosphorylation [GO:0006468 biological_process] (1); ATP binding [GO:0005524 molecular_function] (1)                                                                                                                                                                                                                                                                                     | Protein kinase-like domain [IPRO11009] (1); Protein kinase domain [IPRO00719] (1); Serine/threonine/tyrosine-protein kinase catalytic domain [IPRO01245] (1); Serine/threonine-protein kinase, active site [IPRO08271] (1); Serine/threonine/dial specificity protein kinase, catalytic domain [IPRO02290] (1)                                                                                                                                                                                                                                                                                                           | -                               | -                           | P_trifoliata_00215_mRNA_1.1     |
| GF0046831 | 0                            | 0                        | 1                            | Hypothetical protein (1)                                       |                                                                                                                                                                                                                                                                                                                                                                                                                                                               |                                                                                                                                                                                                                                                                                                                                                                                                                                                                                                                                                                                                                          | -                               | -                           | P_trifoliata_00214_mRNA_9.1     |
| GF0046830 | 0                            | 0                        | 1                            | Hypothetical protein (1)                                       |                                                                                                                                                                                                                                                                                                                                                                                                                                                               |                                                                                                                                                                                                                                                                                                                                                                                                                                                                                                                                                                                                                          | -                               | -                           | P_trifoliata_00214_mRNA_8.1     |
| GF0046829 | 0                            | 0                        | 1                            | Hypothetical protein (1)                                       | aspartic-type endopeptidase activity [GO:0004190 molecular_function] (1); proteolysis [GO:0006508 biological_process] (1)                                                                                                                                                                                                                                                                                                                                     | Peptidase family A1 domain [IPRO33121] (1); Aspartic peptidase domain [IPRO21109] (1); Aspartic peptidase, active site [IPRO01909] (1); Aspartic peptidase A1 family [IPRO01461] (1)                                                                                                                                                                                                                                                                                                                                                                                                                                     | -                               | -                           | P_trifoliata_00214_mRNA_7.1     |



| ID        | Num. in <i>C. clementiae</i> | Num. in <i>C. canthii</i> | Num. in <i>P. trifoliata</i> | Note                                                                         | GO                                                                                                                                                                                                                            | InterPro                                                                                                                                                                                                                                                                                                                                                                                                                                    | Members in <i>C. clementiae</i> | Members in <i>C. canthii</i> | Members in <i>P. trifoliata</i> |
|-----------|------------------------------|---------------------------|------------------------------|------------------------------------------------------------------------------|-------------------------------------------------------------------------------------------------------------------------------------------------------------------------------------------------------------------------------|---------------------------------------------------------------------------------------------------------------------------------------------------------------------------------------------------------------------------------------------------------------------------------------------------------------------------------------------------------------------------------------------------------------------------------------------|---------------------------------|------------------------------|---------------------------------|
| GF0046759 | 0                            | 0                         | 1                            | UDP-glucose flavonoid 3-O-glucosyltransferase 7 (1)                          | metabolic process [GO:0008152]<br>biological_process (1); transferase activity, transferring hexosyl groups [GO:0016758 molecular_function (1)                                                                                | UDP-glucuronosyl/UDP-glucosyltransferase [IPRO02213] (1)                                                                                                                                                                                                                                                                                                                                                                                    | -                               | -                            | P_trifoliata_00209_miRNA_42.1   |
| GF0046758 | 0                            | 0                         | 1                            | Hypothetical protein (1)                                                     | -                                                                                                                                                                                                                             | -                                                                                                                                                                                                                                                                                                                                                                                                                                           | -                               | -                            | P_trifoliata_00209_miRNA_35.1   |
| GF0046757 | 0                            | 0                         | 1                            | Hypothetical protein (1)                                                     | -                                                                                                                                                                                                                             | Retrontransposon gag domain [IPRO05162] (1)                                                                                                                                                                                                                                                                                                                                                                                                 | -                               | -                            | P_trifoliata_00209_miRNA_33.1   |
| GF0046756 | 0                            | 0                         | 1                            | Hypothetical protein (1)                                                     | -                                                                                                                                                                                                                             | -                                                                                                                                                                                                                                                                                                                                                                                                                                           | -                               | -                            | P_trifoliata_00209_miRNA_32.1   |
| GF0046755 | 0                            | 0                         | 1                            | Hypothetical protein (1)                                                     | -                                                                                                                                                                                                                             | -                                                                                                                                                                                                                                                                                                                                                                                                                                           | -                               | -                            | P_trifoliata_00209_miRNA_31.1   |
| GF0046754 | 0                            | 0                         | 1                            | Calmodulin binding protein (1)                                               | -                                                                                                                                                                                                                             | Protein of unknown function DUF1645, plant [IPRO12442] (1)                                                                                                                                                                                                                                                                                                                                                                                  | -                               | -                            | P_trifoliata_00209_miRNA_30.1   |
| GF0046753 | 0                            | 0                         | 1                            | Hypothetical protein (1)                                                     | -                                                                                                                                                                                                                             | -                                                                                                                                                                                                                                                                                                                                                                                                                                           | -                               | -                            | P_trifoliata_00209_miRNA_17.1   |
| GF0046752 | 0                            | 0                         | 1                            | Hypothetical protein (1)                                                     | -                                                                                                                                                                                                                             | -                                                                                                                                                                                                                                                                                                                                                                                                                                           | -                               | -                            | P_trifoliata_00209_miRNA_1.1    |
| GF0046751 | 0                            | 0                         | 1                            | Hypothetical protein (1)                                                     | -                                                                                                                                                                                                                             | -                                                                                                                                                                                                                                                                                                                                                                                                                                           | -                               | -                            | P_trifoliata_00208_miRNA_7.1    |
| GF0046750 | 0                            | 0                         | 1                            | Hypothetical protein (1)                                                     | -                                                                                                                                                                                                                             | -                                                                                                                                                                                                                                                                                                                                                                                                                                           | -                               | -                            | P_trifoliata_00208_miRNA_4.1    |
| GF0046749 | 0                            | 0                         | 1                            | Leucine-rich repeat receptor-like 1 serine/threonine-protein kinase BAMI (1) | protein binding [GO:0005515 molecular_function (1)]; protein phosphorylation [GO:0006468 biological_process (1)]; protein kinase activity [GO:0004872 molecular_function (1)]; ATP binding [GO:0005524 molecular_function (1) | Protein kinase domain [IPRO00719] (1); Protein kinase-like domain [IPRO11009] (1); Leucine-rich repeat domain, L domain-like [IPRO32675] (1); Leucine-rich repeat, typical subtype [IPRO03591] (1); Serine/threonine/dual specificity protein kinase, catalytic domain [IPRO02290] (1); Serine/threonine-protein kinase, active site [IPRO08271] (1); Protein kinase, ATP binding site [IPRO17441] (1); Leucine-rich repeat [IPRO01611] (1) | -                               | -                            | P_trifoliata_00208_miRNA_33.1   |
| GF0046748 | 0                            | 0                         | 1                            | Hypothetical protein (1)                                                     | protein dimerization activity [GO:0046983 molecular_function (1)]; nucleic acid binding [GO:0003676 molecular_function (1)                                                                                                    | Ribonuclease H-like domain [IPRO12337] (1); HAT, C-terminal dimerization domain [IPRO08906] (1)                                                                                                                                                                                                                                                                                                                                             | -                               | -                            | P_trifoliata_00208_miRNA_30.1   |
| GF0046747 | 0                            | 0                         | 1                            | Hypothetical protein (1)                                                     | nucleic acid binding [GO:0003676 molecular_function (1)                                                                                                                                                                       | Ribonuclease H-like domain [IPRO12337] (1)                                                                                                                                                                                                                                                                                                                                                                                                  | -                               | -                            | P_trifoliata_00208_miRNA_3.1    |
| GF0046746 | 0                            | 0                         | 1                            | Hypothetical protein (1)                                                     | -                                                                                                                                                                                                                             | -                                                                                                                                                                                                                                                                                                                                                                                                                                           | -                               | -                            | P_trifoliata_00208_miRNA_26.1   |
| GF0046745 | 0                            | 0                         | 1                            | Hypothetical protein (1)                                                     | -                                                                                                                                                                                                                             | -                                                                                                                                                                                                                                                                                                                                                                                                                                           | -                               | -                            | P_trifoliata_00208_miRNA_24.1   |
| GF0046744 | 0                            | 0                         | 1                            | Hypothetical protein (1)                                                     | -                                                                                                                                                                                                                             | -                                                                                                                                                                                                                                                                                                                                                                                                                                           | -                               | -                            | P_trifoliata_00208_miRNA_18.1   |
| GF0046743 | 0                            | 0                         | 1                            | Hypothetical protein (1)                                                     | nucleic acid binding [GO:0003676 molecular_function (1)]; zinc ion binding [GO:0008270 molecular_function (1)                                                                                                                 | Zinc finger, CCHC-type [IPRO01878] (1)                                                                                                                                                                                                                                                                                                                                                                                                      | -                               | -                            | P_trifoliata_00208_miRNA_14.1   |
| GF0046742 | 0                            | 0                         | 1                            | Hypothetical protein (1)                                                     | heme binding [GO:0020037 molecular_function (1)                                                                                                                                                                               | Cytochrome b5, heme-binding site [IPRO18506] (1); Cytochrome b5-like heme/sterol binding domain [IPRO1159] (1)                                                                                                                                                                                                                                                                                                                              | -                               | -                            | P_trifoliata_00208_miRNA_13.1   |
| GF0046741 | 0                            | 0                         | 1                            | Hypothetical protein (1)                                                     | nucleic acid binding [GO:0003676 molecular_function (1)                                                                                                                                                                       | Ribonuclease H-like domain [IPRO12337] (1)                                                                                                                                                                                                                                                                                                                                                                                                  | -                               | -                            | P_trifoliata_00208_miRNA_12.1   |
| GF0046740 | 0                            | 0                         | 1                            | Phytosulfokine receptor (1)                                                  | -                                                                                                                                                                                                                             | Leucine-rich repeat domain, L domain-like [IPRO32675] (1); Leucine-rich repeat-containing N-terminal, plant-type [IPRO13210] (1)                                                                                                                                                                                                                                                                                                            | -                               | -                            | P_trifoliata_00207_miRNA_9.1    |
| GF0046739 | 0                            | 0                         | 1                            | Hypothetical protein (1)                                                     | -                                                                                                                                                                                                                             | Cobalamin (vitamin B12) biosynthesis Co-W, C-terminal [IPRO11629] (1)                                                                                                                                                                                                                                                                                                                                                                       | -                               | -                            | P_trifoliata_00207_miRNA_8.1    |
| GF0046738 | 0                            | 0                         | 1                            | Hypothetical protein (1)                                                     | -                                                                                                                                                                                                                             | -                                                                                                                                                                                                                                                                                                                                                                                                                                           | -                               | -                            | P_trifoliata_00207_miRNA_5.1    |
| GF0046737 | 0                            | 0                         | 1                            | Hypothetical protein (1)                                                     | -                                                                                                                                                                                                                             | -                                                                                                                                                                                                                                                                                                                                                                                                                                           | -                               | -                            | P_trifoliata_00207_miRNA_44.1   |
| GF0046736 | 0                            | 0                         | 1                            | Hypothetical protein (1)                                                     | -                                                                                                                                                                                                                             | -                                                                                                                                                                                                                                                                                                                                                                                                                                           | -                               | -                            | P_trifoliata_00207_miRNA_41.1   |
| GF0046735 | 0                            | 0                         | 1                            | Hypothetical protein (1)                                                     | -                                                                                                                                                                                                                             | -                                                                                                                                                                                                                                                                                                                                                                                                                                           | -                               | -                            | P_trifoliata_00207_miRNA_40.1   |
| GF0046734 | 0                            | 0                         | 1                            | Hypothetical protein (1)                                                     | -                                                                                                                                                                                                                             | CaW/Hyb/UseG domain [IPRO03495] (1); P-loop containing nucleoside triphosphate hydrolase [IPRO27417] (1)                                                                                                                                                                                                                                                                                                                                    | -                               | -                            | P_trifoliata_00207_miRNA_4.1    |
| GF0046733 | 0                            | 0                         | 1                            | Hypothetical protein (1)                                                     | -                                                                                                                                                                                                                             | -                                                                                                                                                                                                                                                                                                                                                                                                                                           | -                               | -                            | P_trifoliata_00207_miRNA_38.1   |
| GF0046732 | 0                            | 0                         | 1                            | Hypothetical protein (1)                                                     | -                                                                                                                                                                                                                             | -                                                                                                                                                                                                                                                                                                                                                                                                                                           | -                               | -                            | P_trifoliata_00207_miRNA_36.1   |
| GF0046731 | 0                            | 0                         | 1                            | Hypothetical protein (1)                                                     | -                                                                                                                                                                                                                             | -                                                                                                                                                                                                                                                                                                                                                                                                                                           | -                               | -                            | P_trifoliata_00207_miRNA_27.1   |
| GF0046730 | 0                            | 0                         | 1                            | Hypothetical protein (1)                                                     | -                                                                                                                                                                                                                             | -                                                                                                                                                                                                                                                                                                                                                                                                                                           | -                               | -                            | P_trifoliata_00207_miRNA_14.1   |
| GF0046729 | 0                            | 0                         | 1                            | COBw domain-containing protein 1 (1)                                         | -                                                                                                                                                                                                                             | CaW/Hyb/UseG domain [IPRO03495] (1); P-loop containing nucleoside triphosphate hydrolase [IPRO27417] (1)                                                                                                                                                                                                                                                                                                                                    | -                               | -                            | P_trifoliata_00207_miRNA_1.1    |
| GF0046728 | 0                            | 0                         | 1                            | Hypothetical protein (1)                                                     | -                                                                                                                                                                                                                             | -                                                                                                                                                                                                                                                                                                                                                                                                                                           | -                               | -                            | P_trifoliata_00206_miRNA_7.1    |
| GF0046727 | 0                            | 0                         | 1                            | Hypothetical protein (1)                                                     | -                                                                                                                                                                                                                             | -                                                                                                                                                                                                                                                                                                                                                                                                                                           | -                               | -                            | P_trifoliata_00206_miRNA_4.1    |
| GF0046726 | 0                            | 0                         | 1                            | Hypothetical protein (1)                                                     | -                                                                                                                                                                                                                             | -                                                                                                                                                                                                                                                                                                                                                                                                                                           | -                               | -                            | P_trifoliata_00206_miRNA_3.1    |
| GF0046725 | 0                            | 0                         | 1                            | Exostonin family protein (1)                                                 | Exostonin-like [IPRO04263] (1)                                                                                                                                                                                                | -                                                                                                                                                                                                                                                                                                                                                                                                                                           | -                               | -                            | P_trifoliata_00205_miRNA_11.1   |
| GF0046724 | 0                            | 0                         | 1                            | Hypothetical protein (1)                                                     | -                                                                                                                                                                                                                             | -                                                                                                                                                                                                                                                                                                                                                                                                                                           | -                               | -                            | P_trifoliata_00205_miRNA_9.1    |
| GF0046723 | 0                            | 0                         | 1                            | Hypothetical protein (1)                                                     | -                                                                                                                                                                                                                             | -                                                                                                                                                                                                                                                                                                                                                                                                                                           | -                               | -                            | P_trifoliata_00205_miRNA_58.1   |
| GF0046722 | 0                            | 0                         | 1                            | Trichome birefringence-like 14 (1)                                           | -                                                                                                                                                                                                                             | PMRS N-terminal domain [IPRO25846] (1); PC-Esterase [IPRO26057] (1)                                                                                                                                                                                                                                                                                                                                                                         | -                               | -                            | P_trifoliata_00205_miRNA_41.1   |
| GF0046721 | 0                            | 0                         | 1                            | Hypothetical protein (1)                                                     | biosynthetic process [GO:0009058 biological_process (1)]; aminocyclide synthase activity [GO:0016844 molecular_function (1)                                                                                                   | Six-bladed beta-propeller, Toll-like [IPRO11042] (1); Strictosidine synthase [IPRO04141] (1)                                                                                                                                                                                                                                                                                                                                                | -                               | -                            | P_trifoliata_00205_miRNA_35.1   |
| GF0046720 | 0                            | 0                         | 1                            | Hypothetical protein (1)                                                     | -                                                                                                                                                                                                                             | -                                                                                                                                                                                                                                                                                                                                                                                                                                           | -                               | -                            | P_trifoliata_00205_miRNA_34.1   |
| GF0046719 | 0                            | 0                         | 1                            | Hypothetical protein (1)                                                     | -                                                                                                                                                                                                                             | -                                                                                                                                                                                                                                                                                                                                                                                                                                           | -                               | -                            | P_trifoliata_00205_miRNA_33.1   |
| GF0046718 | 0                            | 0                         | 1                            | Hypothetical protein (1)                                                     | -                                                                                                                                                                                                                             | Peptidase S8 propeptide/proteinase inhibitor 19 [IPRO10259] (1); Proteinase inhibitor, propeptide [IPRO09020] (1); Peptidase S8, subtilisin-related [IPRO1590] (1)                                                                                                                                                                                                                                                                          | -                               | -                            | P_trifoliata_00205_miRNA_28.1   |
| GF0046717 | 0                            | 0                         | 1                            | Phosphatidylinositol transfer-like protein II (1)                            | -                                                                                                                                                                                                                             | CRAL-TRIO lipid binding domain [IPRO01251] (1)                                                                                                                                                                                                                                                                                                                                                                                              | -                               | -                            | P_trifoliata_00205_miRNA_1.1    |
| GF0046716 | 0                            | 0                         | 1                            | Hypothetical protein (1)                                                     | -                                                                                                                                                                                                                             | Calycin [IPRO12674] (1); Calycin-like [IPRO11038] (1); Domain of unknown function DUF3598 [IPRO22017] (1)                                                                                                                                                                                                                                                                                                                                   | -                               | -                            | P_trifoliata_00204_miRNA_5.1    |
| GF0046715 | 0                            | 0                         | 1                            | Glutamate [NMDA] receptor subunit epsilon-1 (1)                              | -                                                                                                                                                                                                                             | RST domain of plant C-terminal [IPRO22003] (1)                                                                                                                                                                                                                                                                                                                                                                                              | -                               | -                            | P_trifoliata_00204_miRNA_49.1   |
| GF0046714 | 0                            | 0                         | 1                            | Hypothetical protein (1)                                                     | -                                                                                                                                                                                                                             | -                                                                                                                                                                                                                                                                                                                                                                                                                                           | -                               | -                            | P_trifoliata_00204_miRNA_3.1    |
| GF0046713 | 0                            | 0                         | 1                            | Hypothetical protein (1)                                                     | -                                                                                                                                                                                                                             | -                                                                                                                                                                                                                                                                                                                                                                                                                                           | -                               | -                            | P_trifoliata_00203_miRNA_8.1    |
| GF0046712 | 0                            | 0                         | 1                            | Hypothetical protein (1)                                                     | -                                                                                                                                                                                                                             | -                                                                                                                                                                                                                                                                                                                                                                                                                                           | -                               | -                            | P_trifoliata_00203_miRNA_7.1    |
| GF0046711 | 0                            | 0                         | 1                            | Hypothetical protein (1)                                                     | -                                                                                                                                                                                                                             | -                                                                                                                                                                                                                                                                                                                                                                                                                                           | -                               | -                            | P_trifoliata_00203_miRNA_62.1   |
| GF0046710 | 0                            | 0                         | 1                            | Hypothetical protein (1)                                                     | -                                                                                                                                                                                                                             | Reverse transcriptase, RNA-dependent DNA polymerase [IPRO13103] (1)                                                                                                                                                                                                                                                                                                                                                                         | -                               | -                            | P_trifoliata_00203_miRNA_58.1   |
| GF0046709 | 0                            | 0                         | 1                            | Hypothetical protein (1)                                                     | -                                                                                                                                                                                                                             | Conserved hypothetical protein CHP01589, plant [IPRO06476] (1)                                                                                                                                                                                                                                                                                                                                                                              | -                               | -                            | P_trifoliata_00203_miRNA_46.1   |
| GF0046708 | 0                            | 0                         | 1                            | Hypothetical protein (1)                                                     | -                                                                                                                                                                                                                             | -                                                                                                                                                                                                                                                                                                                                                                                                                                           | -                               | -                            | P_trifoliata_00203_miRNA_45.1   |
| GF0046707 | 0                            | 0                         | 1                            | Hypothetical protein (1)                                                     | -                                                                                                                                                                                                                             | -                                                                                                                                                                                                                                                                                                                                                                                                                                           | -                               | -                            | P_trifoliata_00203_miRNA_4.1    |
| GF0046706 | 0                            | 0                         | 1                            | Hypothetical protein (1)                                                     | ribosome [GO:0005840 cellular_component (1)]; intracellular translation [GO:0006412 biological_process (1)]; structural constituent of ribosome [GO:0003735 molecular_function (1)                                            | Ribosomal protein L29 [IPRO01854] (1)                                                                                                                                                                                                                                                                                                                                                                                                       | -                               | -                            | P_trifoliata_00203_miRNA_34.1   |
| GF0046705 | 0                            | 0                         | 1                            | Hypothetical protein (1)                                                     | -                                                                                                                                                                                                                             | -                                                                                                                                                                                                                                                                                                                                                                                                                                           | -                               | -                            | P_trifoliata_00203_miRNA_30.1   |
| GF0046704 | 0                            | 0                         | 1                            | Hypothetical protein (1)                                                     | -                                                                                                                                                                                                                             | -                                                                                                                                                                                                                                                                                                                                                                                                                                           | -                               | -                            | P_trifoliata_00203_miRNA_29.1   |
| GF0046703 | 0                            | 0                         | 1                            | Hypothetical protein (1)                                                     | -                                                                                                                                                                                                                             | -                                                                                                                                                                                                                                                                                                                                                                                                                                           | -                               | -                            | P_trifoliata_00203_miRNA_27.1   |
| GF0046702 | 0                            | 0                         | 1                            | Hypothetical protein (1)                                                     | -                                                                                                                                                                                                                             | -                                                                                                                                                                                                                                                                                                                                                                                                                                           | -                               | -                            | P_trifoliata_00203_miRNA_20.1   |
| GF0046701 | 0                            | 0                         | 1                            | Hypothetical protein (1)                                                     | -                                                                                                                                                                                                                             | Zinc: zinc finger C2C2/CMHC/C [IPRO25836] (1); SAC3/GANP/THP3 [IPRO05062] (1)                                                                                                                                                                                                                                                                                                                                                               | -                               | -                            | P_trifoliata_00203_miRNA_18.1   |
| GF0046700 | 0                            | 0                         | 1                            | Polynucleotidyl transferase, Ribonuclease H fold (1)                         | nucleic acid binding [GO:0003676 molecular_function (1)]                                                                                                                                                                      | Reverse transcriptase zinc-binding domain [IPRO03960] (1); Ribonuclease H-like domain [IPRO12337] (1)                                                                                                                                                                                                                                                                                                                                       | -                               | -                            | P_trifoliata_00203_miRNA_15.1   |
| GF0046699 | 0                            | 0                         | 1                            | Hypothetical protein (1)                                                     | -                                                                                                                                                                                                                             | -                                                                                                                                                                                                                                                                                                                                                                                                                                           | -                               | -                            | P_trifoliata_00203_miRNA_11.1   |
| GF0046698 | 0                            | 0                         | 1                            | Putative 26S protease regulatory subunit 6A like protein (1)                 | ATP binding [GO:0005524 molecular_function (1)]                                                                                                                                                                               | ATPase, AAA-type, conserved site [IPRO03960] (1); ATPase, AAA-type, core [IPRO03959] (1); P-loop containing nucleoside triphosphate hydrolase [IPRO27417] (1)                                                                                                                                                                                                                                                                               | -                               | -                            | P_trifoliata_00202_miRNA_73.1   |
| GF0046697 | 0                            | 0                         | 1                            | Hypothetical protein (1)                                                     | -                                                                                                                                                                                                                             | -                                                                                                                                                                                                                                                                                                                                                                                                                                           | -                               | -                            | P_trifoliata_00202_miRNA_65.1   |
| GF0046696 | 0                            | 0                         | 1                            | Hypothetical protein (1)                                                     | -                                                                                                                                                                                                                             | -                                                                                                                                                                                                                                                                                                                                                                                                                                           | -                               | -                            | P_trifoliata_00202_miRNA_28.1   |
| GF0046695 | 0                            | 0                         | 1                            | Hypothetical protein (1)                                                     | -                                                                                                                                                                                                                             | -                                                                                                                                                                                                                                                                                                                                                                                                                                           | -                               | -                            | P_trifoliata_00202_miRNA_27.1   |
| GF0046694 | 0                            | 0                         | 1                            | Putative disease resistance gene NBS-LRR family protein (1)                  | ADP binding [GO:0043531 molecular_function (1)]                                                                                                                                                                               | Leucine-rich repeat domain, L domain-like [IPRO32675] (1); NB-ARC [IPRO02182] (1); P-loop containing nucleoside triphosphate hydrolase [IPRO27417] (1)                                                                                                                                                                                                                                                                                      | -                               | -                            | P_trifoliata_00202_miRNA_26.1   |
| GF0046693 | 0                            | 0                         | 1                            | Hypothetical protein (1)                                                     | -                                                                                                                                                                                                                             | -                                                                                                                                                                                                                                                                                                                                                                                                                                           | -                               | -                            | P_trifoliata_00202_miRNA_24.1   |
| GF0046692 | 0                            | 0                         | 1                            | Hypothetical protein (1)                                                     | -                                                                                                                                                                                                                             | -                                                                                                                                                                                                                                                                                                                                                                                                                                           | -                               | -                            | P_trifoliata_00202_miRNA_19.1   |
| GF0046691 | 0                            | 0                         | 1                            | Hypothetical protein (1)                                                     | enzyme inhibitor activity [GO:0004857 molecular_function (1)]                                                                                                                                                                 | Pectinesterase inhibitor domain [IPRO06501] (1)                                                                                                                                                                                                                                                                                                                                                                                             | -                               | -                            | P_trifoliata_00202_miRNA_18.1   |
| GF0046690 | 0                            | 0                         | 1                            | Pectinesterase inhibitor (1)                                                 | enzyme inhibitor activity [GO:0004857 molecular_function (1)]                                                                                                                                                                 | Pectinesterase inhibitor domain [IPRO06501] (1)                                                                                                                                                                                                                                                                                                                                                                                             | -                               | -                            | P_trifoliata_00202_miRNA_17.1   |
| GF0046689 | 0                            | 0                         | 1                            | Hypothetical protein (1)                                                     | -                                                                                                                                                                                                                             | -                                                                                                                                                                                                                                                                                                                                                                                                                                           | -                               | -                            | P_trifoliata_00202_miRNA_16.1   |
| GF0046688 | 0                            | 0                         | 1                            | Hypothetical protein (1)                                                     | -                                                                                                                                                                                                                             | -                                                                                                                                                                                                                                                                                                                                                                                                                                           | -                               | -                            | P_trifoliata_00202_miRNA_15.1   |
| GF0046687 | 0                            | 0                         | 1                            | Hypothetical protein (1)                                                     | -                                                                                                                                                                                                                             | -                                                                                                                                                                                                                                                                                                                                                                                                                                           | -                               | -                            | P_trifoliata_00202_miRNA_14.1   |
| GF0046686 | 0                            | 0                         | 1                            | Hypothetical protein (1)                                                     | -                                                                                                                                                                                                                             | Alpha/Beta hydrolase fold [IPRO29058] (1)                                                                                                                                                                                                                                                                                                                                                                                                   | -                               | -                            | P_trifoliata_00202_miRNA_12.1   |



| ID        | Num. in <i>C. clementiae</i> | Num. in <i>C. canihii</i> | Num. in <i>P. trifoliata</i> | Note                                                              | GO                                                                                                                                                                                                                                                                                                                                                                     | InterPro                                                                                                                                                                                                                                                                                                                                                                                                                                                                                                                                                                     | Members in <i>C. clementiae</i> | Members in <i>C. canihii</i> | Members in <i>P. trifoliata</i> |
|-----------|------------------------------|---------------------------|------------------------------|-------------------------------------------------------------------|------------------------------------------------------------------------------------------------------------------------------------------------------------------------------------------------------------------------------------------------------------------------------------------------------------------------------------------------------------------------|------------------------------------------------------------------------------------------------------------------------------------------------------------------------------------------------------------------------------------------------------------------------------------------------------------------------------------------------------------------------------------------------------------------------------------------------------------------------------------------------------------------------------------------------------------------------------|---------------------------------|------------------------------|---------------------------------|
| GF0046685 | 0                            | 0                         | 0                            | 1 Class I peptide chain release factor (1)                        | translational termination [GO:0006415 biological_process] (1); translation release factor activity [GO:0003747 molecular_function] (1)                                                                                                                                                                                                                                 | Peptide chain release factor class I/class II [IPR000352] (1); Double-stranded RNA-binding domain [IPR014720] (1)                                                                                                                                                                                                                                                                                                                                                                                                                                                            | -                               | -                            | P_trifoliata_00202_mRNA_11.1    |
| GF0046684 | 0                            | 0                         | 0                            | 1 Hypothetical protein (1)                                        |                                                                                                                                                                                                                                                                                                                                                                        | Leucine-rich repeat domain, L domain-like [IPR032675] (1)                                                                                                                                                                                                                                                                                                                                                                                                                                                                                                                    | -                               | -                            | P_trifoliata_00202_mRNA_10.1    |
| GF0046683 | 0                            | 0                         | 0                            | 1 Hypothetical protein (1)                                        |                                                                                                                                                                                                                                                                                                                                                                        |                                                                                                                                                                                                                                                                                                                                                                                                                                                                                                                                                                              | -                               | -                            | P_trifoliata_00201_mRNA_9.1     |
| GF0046682 | 0                            | 0                         | 0                            | 1 Hypothetical protein (1)                                        |                                                                                                                                                                                                                                                                                                                                                                        |                                                                                                                                                                                                                                                                                                                                                                                                                                                                                                                                                                              | -                               | -                            | P_trifoliata_00201_mRNA_58.1    |
| GF0046681 | 0                            | 0                         | 0                            | 1 Hypothetical protein (1)                                        |                                                                                                                                                                                                                                                                                                                                                                        |                                                                                                                                                                                                                                                                                                                                                                                                                                                                                                                                                                              | -                               | -                            | P_trifoliata_00201_mRNA_34.1    |
| GF0046680 | 0                            | 0                         | 0                            | 1 Hypothetical protein (1)                                        |                                                                                                                                                                                                                                                                                                                                                                        | Endonuclease/exonuclease/phosphatase [IPR005135] (1)                                                                                                                                                                                                                                                                                                                                                                                                                                                                                                                         | -                               | -                            | P_trifoliata_00200_mRNA_9.1     |
| GF0046679 | 0                            | 0                         | 0                            | 1 Hypothetical protein (1)                                        |                                                                                                                                                                                                                                                                                                                                                                        |                                                                                                                                                                                                                                                                                                                                                                                                                                                                                                                                                                              | -                               | -                            | P_trifoliata_00200_mRNA_8.1     |
| GF0046678 | 0                            | 0                         | 0                            | 1 Hypothetical protein (1)                                        |                                                                                                                                                                                                                                                                                                                                                                        |                                                                                                                                                                                                                                                                                                                                                                                                                                                                                                                                                                              | -                               | -                            | P_trifoliata_00200_mRNA_7.1     |
| GF0046677 | 0                            | 0                         | 0                            | 1 Hypothetical protein (1)                                        |                                                                                                                                                                                                                                                                                                                                                                        |                                                                                                                                                                                                                                                                                                                                                                                                                                                                                                                                                                              | -                               | -                            | P_trifoliata_00200_mRNA_6.1     |
| GF0046676 | 0                            | 0                         | 0                            | 1 Hypothetical protein (1)                                        |                                                                                                                                                                                                                                                                                                                                                                        |                                                                                                                                                                                                                                                                                                                                                                                                                                                                                                                                                                              | -                               | -                            | P_trifoliata_00200_mRNA_30.1    |
| GF0046675 | 0                            | 0                         | 0                            | 1 Hypothetical protein (1)                                        | carbohydrate metabolic process [GO:0005975 biological_process] (1); hydrolase activity, hydrolyzing O-glycosyl compounds [GO:0004553 molecular_function] (1)                                                                                                                                                                                                           | Peptidase family A1 domain [IPR033121] (1); Glycoside hydrolase 35, catalytic domain [IPR031330] (1); Galactose-binding domain-like [IPR008979] (1); Aspartic peptidase domain [IPR021109] (1); Glycoside hydrolase superfamily [IPR017853] (1); Beta-galactosidase jelly roll domain [IPR025300] (1); Glycoside hydrolase, catalytic domain [IPR013781] (1); Glycoside hydrolase, family 35 [IPR001944] (1); Xylanase inhibitor, N-terminal [IPR032861] (1); Xylanase inhibitor, C-terminal [IPR037399] (1); Glycoside hydrolase, family 35, conserved site [IPR019801] (1) | -                               | -                            | P_trifoliata_00200_mRNA_26.1    |
| GF0046674 | 0                            | 0                         | 0                            | 1 Hypothetical protein (1)                                        |                                                                                                                                                                                                                                                                                                                                                                        |                                                                                                                                                                                                                                                                                                                                                                                                                                                                                                                                                                              | -                               | -                            | P_trifoliata_00200_mRNA_21.1    |
| GF0046673 | 0                            | 0                         | 0                            | 1 Hypothetical protein (1)                                        |                                                                                                                                                                                                                                                                                                                                                                        |                                                                                                                                                                                                                                                                                                                                                                                                                                                                                                                                                                              | -                               | -                            | P_trifoliata_00200_mRNA_19.1    |
| GF0046672 | 0                            | 0                         | 0                            | 1 Hypothetical protein (1)                                        |                                                                                                                                                                                                                                                                                                                                                                        |                                                                                                                                                                                                                                                                                                                                                                                                                                                                                                                                                                              | -                               | -                            | P_trifoliata_00200_mRNA_1.1     |
| GF0046671 | 0                            | 0                         | 0                            | 1 Hypothetical protein (1)                                        |                                                                                                                                                                                                                                                                                                                                                                        |                                                                                                                                                                                                                                                                                                                                                                                                                                                                                                                                                                              | -                               | -                            | P_trifoliata_00199_mRNA_9.1     |
| GF0046670 | 0                            | 0                         | 0                            | 1 Hypothetical protein (1)                                        |                                                                                                                                                                                                                                                                                                                                                                        |                                                                                                                                                                                                                                                                                                                                                                                                                                                                                                                                                                              | -                               | -                            | P_trifoliata_00199_mRNA_8.1     |
| GF0046669 | 0                            | 0                         | 0                            | 1 Hypothetical protein (1)                                        |                                                                                                                                                                                                                                                                                                                                                                        |                                                                                                                                                                                                                                                                                                                                                                                                                                                                                                                                                                              | -                               | -                            | P_trifoliata_00199_mRNA_7.1     |
| GF0046668 | 0                            | 0                         | 0                            | 1 Hypothetical protein (1)                                        |                                                                                                                                                                                                                                                                                                                                                                        |                                                                                                                                                                                                                                                                                                                                                                                                                                                                                                                                                                              | -                               | -                            | P_trifoliata_00199_mRNA_55.1    |
| GF0046667 | 0                            | 0                         | 0                            | 1 Hypothetical protein (1)                                        |                                                                                                                                                                                                                                                                                                                                                                        |                                                                                                                                                                                                                                                                                                                                                                                                                                                                                                                                                                              | -                               | -                            | P_trifoliata_00199_mRNA_54.1    |
| GF0046666 | 0                            | 0                         | 0                            | 1 Hypothetical protein (1)                                        |                                                                                                                                                                                                                                                                                                                                                                        |                                                                                                                                                                                                                                                                                                                                                                                                                                                                                                                                                                              | -                               | -                            | P_trifoliata_00199_mRNA_38.1    |
| GF0046665 | 0                            | 0                         | 0                            | 1 Putative inactive receptor kinase (1)                           | ATP binding [GO:0005524 molecular_function] (1); protein phosphorylation [GO:0006468 biological_process] (1); protein kinase activity [GO:0004672 molecular_function] (1)                                                                                                                                                                                              | Protein kinase domain [IPR000719] (1); Protein kinase-like domain [IPR011099] (1); Serine-threonine-tyrosine-protein kinase catalytic domain [IPR001245] (1)                                                                                                                                                                                                                                                                                                                                                                                                                 | -                               | -                            | P_trifoliata_00199_mRNA_37.1    |
| GF0046664 | 0                            | 0                         | 0                            | 1 Hypothetical protein (1)                                        |                                                                                                                                                                                                                                                                                                                                                                        | Transposase, Top1/En1/Spm-like [IPR04264] (1)                                                                                                                                                                                                                                                                                                                                                                                                                                                                                                                                | -                               | -                            | P_trifoliata_00199_mRNA_3.1     |
| GF0046663 | 0                            | 0                         | 0                            | 1 Leucine-rich repeat protein kinase family protein, putative (1) | protein phosphorylation [GO:0006468 biological_process] (1); protein kinase activity [GO:0004672 molecular_function] (1); ATP binding [GO:0005524 molecular_function] (1)                                                                                                                                                                                              | Serine-threonine/tyrosine-protein kinase catalytic domain [IPR001245] (1); Serine-threonine-protein kinase, active site [IPR008271] (1); Serine-threonine/dual specificity protein kinase, catalytic domain [IPR002290] (1); Protein kinase-like domain [IPR011099] (1); Protein kinase domain [IPR000719] (1)                                                                                                                                                                                                                                                               | -                               | -                            | P_trifoliata_00199_mRNA_2.1     |
| GF0046662 | 0                            | 0                         | 0                            | 1 Hypothetical protein (1)                                        | oxidoreductase activity, acting on paired donors, with incorporation or reduction of molecular oxygen [GO:0016705 molecular_function] (1); oxidation-reduction process [GO:005514 biological_process] (1); iron ion binding [GO:0005506 molecular_function] (1); protein binding [GO:0005515 molecular_function] (1); heme binding [GO:0020037 molecular_function] (1) | F-box domain [IPR001810] (1); Cytochrome P450 [IPR001128] (1); Leucine-rich repeat domain, L domain-like [IPR032675] (1); Cytochrome P450, E-class, group 1 [IPR024011] (1)                                                                                                                                                                                                                                                                                                                                                                                                  | -                               | -                            | P_trifoliata_00199_mRNA_19.1    |
| GF0046661 | 0                            | 0                         | 0                            | 1 Cytochrome P450 93A2 (1)                                        | oxidoreductase activity, acting on paired donors, with incorporation or reduction of molecular oxygen [GO:0016705 molecular_function] (1); oxidation-reduction process [GO:005514 biological_process] (1)                                                                                                                                                              | Cytochrome P450 [IPR001128] (1); Cytochrome P450, conserved site [IPR017972] (1); Cytochrome P450, E-class, group 1 [IPR024011] (1)                                                                                                                                                                                                                                                                                                                                                                                                                                          | -                               | -                            | P_trifoliata_00199_mRNA_18.1    |
| GF0046660 | 0                            | 0                         | 0                            | 1 Hypothetical protein (1)                                        | protein binding [GO:0005515 molecular_function] (1)                                                                                                                                                                                                                                                                                                                    | F-box domain [IPR001810] (1); Leucine-rich repeat domain, L domain-like [IPR032675] (1)                                                                                                                                                                                                                                                                                                                                                                                                                                                                                      | -                               | -                            | P_trifoliata_00199_mRNA_14.1    |
| GF0046659 | 0                            | 0                         | 0                            | 1 Hypothetical protein (1)                                        |                                                                                                                                                                                                                                                                                                                                                                        |                                                                                                                                                                                                                                                                                                                                                                                                                                                                                                                                                                              | -                               | -                            | P_trifoliata_00199_mRNA_13.1    |
| GF0046658 | 0                            | 0                         | 0                            | 1 Hypothetical protein (1)                                        |                                                                                                                                                                                                                                                                                                                                                                        |                                                                                                                                                                                                                                                                                                                                                                                                                                                                                                                                                                              | -                               | -                            | P_trifoliata_00198_mRNA_9.1     |
| GF0046657 | 0                            | 0                         | 0                            | 1 Hypothetical protein (1)                                        | oxidation-reduction process [GO:005514 biological_process] (1); oxidoreductase activity, acting on single donors with incorporation of molecular oxygen, incorporation of two atoms of oxygen [GO:0016702 molecular_function] (1)                                                                                                                                      | Carotenoid oxygenase [IPR004294] (1)                                                                                                                                                                                                                                                                                                                                                                                                                                                                                                                                         | -                               | -                            | P_trifoliata_00198_mRNA_8.1     |
| GF0046656 | 0                            | 0                         | 0                            | 1 Hypothetical protein (1)                                        | proteolysis [GO:0006508 biological_process] (1); cysteine-type peptidase activity [GO:0008234 molecular_function] (1)                                                                                                                                                                                                                                                  | Upl1 protease family, C-terminal catalytic domain [IPR003653] (1)                                                                                                                                                                                                                                                                                                                                                                                                                                                                                                            | -                               | -                            | P_trifoliata_00198_mRNA_6.1     |
| GF0046655 | 0                            | 0                         | 0                            | 1 Hypothetical protein (1)                                        |                                                                                                                                                                                                                                                                                                                                                                        |                                                                                                                                                                                                                                                                                                                                                                                                                                                                                                                                                                              | -                               | -                            | P_trifoliata_00198_mRNA_30.1    |
| GF0046654 | 0                            | 0                         | 0                            | 1 Hypothetical protein (1)                                        |                                                                                                                                                                                                                                                                                                                                                                        |                                                                                                                                                                                                                                                                                                                                                                                                                                                                                                                                                                              | -                               | -                            | P_trifoliata_00198_mRNA_28.1    |
| GF0046653 | 0                            | 0                         | 0                            | 1 Hypothetical protein (1)                                        |                                                                                                                                                                                                                                                                                                                                                                        |                                                                                                                                                                                                                                                                                                                                                                                                                                                                                                                                                                              | -                               | -                            | P_trifoliata_00198_mRNA_21.1    |
| GF0046652 | 0                            | 0                         | 0                            | 1 Hypothetical protein (1)                                        |                                                                                                                                                                                                                                                                                                                                                                        |                                                                                                                                                                                                                                                                                                                                                                                                                                                                                                                                                                              | -                               | -                            | P_trifoliata_00198_mRNA_20.1    |
| GF0046651 | 0                            | 0                         | 0                            | 1 Hypothetical protein (1)                                        |                                                                                                                                                                                                                                                                                                                                                                        |                                                                                                                                                                                                                                                                                                                                                                                                                                                                                                                                                                              | -                               | -                            | P_trifoliata_00198_mRNA_2.1     |
| GF0046650 | 0                            | 0                         | 0                            | 1 Hypothetical protein (1)                                        |                                                                                                                                                                                                                                                                                                                                                                        |                                                                                                                                                                                                                                                                                                                                                                                                                                                                                                                                                                              | -                               | -                            | P_trifoliata_00198_mRNA_18.1    |
| GF0046649 | 0                            | 0                         | 0                            | 1 Hypothetical protein (1)                                        |                                                                                                                                                                                                                                                                                                                                                                        |                                                                                                                                                                                                                                                                                                                                                                                                                                                                                                                                                                              | -                               | -                            | P_trifoliata_00198_mRNA_16.1    |
| GF0046648 | 0                            | 0                         | 0                            | 1 Hypothetical protein (1)                                        |                                                                                                                                                                                                                                                                                                                                                                        |                                                                                                                                                                                                                                                                                                                                                                                                                                                                                                                                                                              | -                               | -                            | P_trifoliata_00198_mRNA_15.1    |
| GF0046647 | 0                            | 0                         | 0                            | 1 Hypothetical protein (1)                                        |                                                                                                                                                                                                                                                                                                                                                                        |                                                                                                                                                                                                                                                                                                                                                                                                                                                                                                                                                                              | -                               | -                            | P_trifoliata_00198_mRNA_14.1    |
| GF0046646 | 0                            | 0                         | 0                            | 1 Hypothetical protein (1)                                        |                                                                                                                                                                                                                                                                                                                                                                        |                                                                                                                                                                                                                                                                                                                                                                                                                                                                                                                                                                              | -                               | -                            | P_trifoliata_00198_mRNA_11.1    |
| GF0046645 | 0                            | 0                         | 0                            | 1 Hypothetical protein (1)                                        |                                                                                                                                                                                                                                                                                                                                                                        |                                                                                                                                                                                                                                                                                                                                                                                                                                                                                                                                                                              | -                               | -                            | P_trifoliata_00197_mRNA_4.1     |
| GF0046644 | 0                            | 0                         | 0                            | 1 Hypothetical protein (1)                                        |                                                                                                                                                                                                                                                                                                                                                                        |                                                                                                                                                                                                                                                                                                                                                                                                                                                                                                                                                                              | -                               | -                            | P_trifoliata_00197_mRNA_34.1    |
| GF0046643 | 0                            | 0                         | 0                            | 1 Hypothetical protein (1)                                        |                                                                                                                                                                                                                                                                                                                                                                        |                                                                                                                                                                                                                                                                                                                                                                                                                                                                                                                                                                              | -                               | -                            | P_trifoliata_00197_mRNA_33.1    |
| GF0046642 | 0                            | 0                         | 0                            | 1 Hypothetical protein (1)                                        |                                                                                                                                                                                                                                                                                                                                                                        |                                                                                                                                                                                                                                                                                                                                                                                                                                                                                                                                                                              | -                               | -                            | P_trifoliata_00197_mRNA_28.1    |
| GF0046641 | 0                            | 0                         | 0                            | 1 Hypothetical protein (1)                                        |                                                                                                                                                                                                                                                                                                                                                                        |                                                                                                                                                                                                                                                                                                                                                                                                                                                                                                                                                                              | -                               | -                            | P_trifoliata_00197_mRNA_22.1    |
| GF0046640 | 0                            | 0                         | 0                            | 1 Hypothetical protein (1)                                        |                                                                                                                                                                                                                                                                                                                                                                        |                                                                                                                                                                                                                                                                                                                                                                                                                                                                                                                                                                              | -                               | -                            | P_trifoliata_00197_mRNA_1.1     |
| GF0046639 | 0                            | 0                         | 0                            | 1 Hypothetical protein (1)                                        | metabolic process [GO:0008152 biological_process] (1); transferase activity, transferring hexosyl groups [GO:0016758 molecular_function] (1)                                                                                                                                                                                                                           | UDP-glucuronosyl/UDP-glucosyltransferase [IPR002213] (1)                                                                                                                                                                                                                                                                                                                                                                                                                                                                                                                     | -                               | -                            | P_trifoliata_00196_mRNA_61.1    |
| GF0046638 | 0                            | 0                         | 0                            | 1 Hypothetical protein (1)                                        |                                                                                                                                                                                                                                                                                                                                                                        | Heat shock protein 70 family [IPR013126] (1); Heat shock protein 70, conserved site [IPR018181] (1); Heat shock protein 70kD, peptide-binding domain [IPR029047] (1)                                                                                                                                                                                                                                                                                                                                                                                                         | -                               | -                            | P_trifoliata_00196_mRNA_59.1    |
| GF0046637 | 0                            | 0                         | 0                            | 1 Uridine kinase (1)                                              | fructose-bisphosphate aldolase activity [GO:0004332 molecular_function] (1); metabolic process [GO:0008152 biological_process] (1); kinase activity [GO:0016301 molecular_function] (1); catalytic activity [GO:0003824 molecular_function] (1); ATP binding [GO:0005524 molecular_function] (1); glycolytic process [GO:0006096 biological_process] (1)               | Phosphoryltransferase-like [IPR029057] (1); Fructose-bisphosphate aldolase, class I [IPR000741] (1); Fructose-bisphosphate aldolase class I active site [IPR029708] (1); Aldolase-type TIM barrel [IPR013785] (1); P-loop containing nucleoside triphosphate hydrolase [IPR027471] (1); Phosphoribosylkinase/uridine kinase [IPR006083] (1); Uridine kinase-like [IPR000764] (1)                                                                                                                                                                                             | -                               | -                            | P_trifoliata_00196_mRNA_37.1    |
| GF0046636 | 0                            | 0                         | 0                            | 1 Protein transport protein SFT2 (1)                              | transport [GO:0006810 biological_process] (1); integral component of membrane [GO:0016021 cellular_component] (1); vesicle-mediated transport [GO:0016192 biological_process] (1)                                                                                                                                                                                      | Vesicle transport protein, SFT2-like [IPR011691] (1); Vesicle transport protein, Gosl/SFT2-like [IPR007305] (1)                                                                                                                                                                                                                                                                                                                                                                                                                                                              | -                               | -                            | P_trifoliata_00196_mRNA_33.1    |
| GF0046635 | 0                            | 0                         | 0                            | 1 Hypothetical protein (1)                                        |                                                                                                                                                                                                                                                                                                                                                                        |                                                                                                                                                                                                                                                                                                                                                                                                                                                                                                                                                                              | -                               | -                            | P_trifoliata_00196_mRNA_31.1    |
| GF0046634 | 0                            | 0                         | 0                            | 1 Hypothetical protein (1)                                        |                                                                                                                                                                                                                                                                                                                                                                        |                                                                                                                                                                                                                                                                                                                                                                                                                                                                                                                                                                              | -                               | -                            | P_trifoliata_00196_mRNA_3.1     |
| GF0046633 | 0                            | 0                         | 0                            | 1 Hypothetical protein (1)                                        |                                                                                                                                                                                                                                                                                                                                                                        |                                                                                                                                                                                                                                                                                                                                                                                                                                                                                                                                                                              | -                               | -                            | P_trifoliata_00196_mRNA_26.1    |
| GF0046632 | 0                            | 0                         | 0                            | 1 Hypothetical protein (1)                                        |                                                                                                                                                                                                                                                                                                                                                                        |                                                                                                                                                                                                                                                                                                                                                                                                                                                                                                                                                                              | -                               | -                            | P_trifoliata_00196_mRNA_24.1    |
| GF0046631 | 0                            | 0                         | 0                            | 1 Hypothetical protein (1)                                        |                                                                                                                                                                                                                                                                                                                                                                        |                                                                                                                                                                                                                                                                                                                                                                                                                                                                                                                                                                              | -                               | -                            | P_trifoliata_00196_mRNA_1.1     |
| GF0046630 | 0                            | 0                         | 0                            | 1 Hypothetical protein (1)                                        |                                                                                                                                                                                                                                                                                                                                                                        |                                                                                                                                                                                                                                                                                                                                                                                                                                                                                                                                                                              | -                               | -                            | P_trifoliata_00195_mRNA_8.1     |
| GF0046629 | 0                            | 0                         | 0                            | 1 Hypothetical protein (1)                                        |                                                                                                                                                                                                                                                                                                                                                                        |                                                                                                                                                                                                                                                                                                                                                                                                                                                                                                                                                                              | -                               | -                            | P_trifoliata_00195_mRNA_70.1    |
| GF0046628 | 0                            | 0                         | 0                            | 1 Hypothetical protein (1)                                        |                                                                                                                                                                                                                                                                                                                                                                        |                                                                                                                                                                                                                                                                                                                                                                                                                                                                                                                                                                              | -                               | -                            | P_trifoliata_00195_mRNA_7.1     |
| GF0046627 | 0                            | 0                         | 0                            | 1 Hypothetical protein (1)                                        |                                                                                                                                                                                                                                                                                                                                                                        |                                                                                                                                                                                                                                                                                                                                                                                                                                                                                                                                                                              | -                               | -                            | P_trifoliata_00195_mRNA_69.1    |

| ID        | Num. in <i>C. clementiae</i> | Num. in <i>C. canthii</i> | Num. in <i>P. trifoliata</i> | Note                                                           | GO                                                                                                                                                                                                                                                                                                                                                          | InterPro                                                                                                                                                                                                                                                                                                                                                                                                                                                                                                                                                                                                                                                                                 | Members in <i>C. clementiae</i> | Members in <i>C. canthii</i> | Members in <i>P. trifoliata</i> |
|-----------|------------------------------|---------------------------|------------------------------|----------------------------------------------------------------|-------------------------------------------------------------------------------------------------------------------------------------------------------------------------------------------------------------------------------------------------------------------------------------------------------------------------------------------------------------|------------------------------------------------------------------------------------------------------------------------------------------------------------------------------------------------------------------------------------------------------------------------------------------------------------------------------------------------------------------------------------------------------------------------------------------------------------------------------------------------------------------------------------------------------------------------------------------------------------------------------------------------------------------------------------------|---------------------------------|------------------------------|---------------------------------|
| GF0046626 | 0                            | 0                         | 1                            | LRR receptor-like serine/threonine-protein kinase RPK2 (1)     | protein kinase activity [GO:0004672 molecular_function] (1); protein phosphorylation [GO:0006468 biological_process] (1); ATP binding [GO:0005524 molecular_function] (1); protein binding [GO:0005515 molecular_function] (1)                                                                                                                              | Concanavalin A-like lectin/glucanase domain [IPR013320] (1); Protein kinase-like domain [IPR01009] (1); Leucine-rich repeat domain, L domain-like [IPR032675] (1); Leucine-rich repeat, typical subtype [IPR003913] (1); Protein kinase domain [IPR000719] (1); Leucine-rich repeat [IPR001611] (1); Serine/threonine/dual specificity protein kinase, catalytic domain [IPR002290] (1); Serine/threonine-protein kinase, active site [IPR008271] (1); Serine/threonine-protein kinase, active site [IPR008271] (1); Protein kinase, ATP binding site [IPR013441] (1); Leucine-rich repeat-containing N-terminal, plant-type [IPR013210] (1)                                             | -                               | -                            | P_trifoliata_00195_mRNA_59.1    |
| GF0046625 | 0                            | 0                         | 1                            | Hypothetical protein (1)                                       | molybdate ion transmembrane transporter activity [GO:0015998 molecular_function] (1); molybdate ion transport [GO:0015889 biological_process] (1)                                                                                                                                                                                                           | Molybdate transporter 1/2 [IPR031563] (1)                                                                                                                                                                                                                                                                                                                                                                                                                                                                                                                                                                                                                                                | -                               | -                            | P_trifoliata_00195_mRNA_55.1    |
| GF0046624 | 0                            | 0                         | 1                            | Hypothetical protein (1)                                       |                                                                                                                                                                                                                                                                                                                                                             | S-locus glycoprotein domain [IPR000858] (1); Serine/threonine/dual specificity protein kinase, catalytic domain [IPR002290] (1); S-locus receptor kinase, C-terminal [IPR021820] (1); Serine/threonine-protein kinase, active site [IPR008271] (1); Serine/threonine/tyrosine-protein kinase catalytic domain [IPR001245] (1); PANA-type domain [IPR005699] (1); Bulb-type lectin domain [IPR001480] (1); Protein kinase domain [IPR000719] (1); Protein kinase-like domain [IPR011099] (1); Leucine-rich repeat [IPR001611] (1); NB-ARC [IPR002182] (1); P-loop containing nucleoside triphosphate hydrolase [IPR027417] (1); Leucine-rich repeat domain, L domain-like [IPR032675] (1) | -                               | -                            | P_trifoliata_00195_mRNA_54.1    |
| GF0046623 | 0                            | 0                         | 1                            | S-locus lectin protein kinase family protein isoform 2 (1)     | protein phosphorylation [GO:0006468 biological_process] (1); recognition of pollen [GO:0048544 biological_process] (1); protein serine/threonine kinase activity [GO:0004674 molecular_function] (1); protein kinase activity [GO:0004672 molecular_function] (1); ATP binding [GO:0005524 molecular_function] (1)                                          | Protein kinase-like domain [IPR011099] (1); Bulb-type lectin domain [IPR001480] (1); Serine/threonine/tyrosine-protein kinase catalytic domain [IPR001245] (1)                                                                                                                                                                                                                                                                                                                                                                                                                                                                                                                           | -                               | -                            | P_trifoliata_00195_mRNA_5.1     |
| GF0046622 | 0                            | 0                         | 1                            | Disease resistance protein RPS2 (1)                            | protein binding [GO:0005515 molecular_function] (1); ADP binding [GO:0043531 molecular_function] (1)                                                                                                                                                                                                                                                        | Leucine-rich repeat domain, L domain-like [IPR032675] (1)                                                                                                                                                                                                                                                                                                                                                                                                                                                                                                                                                                                                                                | -                               | -                            | P_trifoliata_00195_mRNA_47.1    |
| GF0046621 | 0                            | 0                         | 1                            | Hypothetical protein (1)                                       |                                                                                                                                                                                                                                                                                                                                                             | Leucine-rich repeat domain, L domain-like [IPR032675] (1)                                                                                                                                                                                                                                                                                                                                                                                                                                                                                                                                                                                                                                | -                               | -                            | P_trifoliata_00195_mRNA_37.1    |
| GF0046620 | 0                            | 0                         | 1                            | Hypothetical protein (1)                                       |                                                                                                                                                                                                                                                                                                                                                             |                                                                                                                                                                                                                                                                                                                                                                                                                                                                                                                                                                                                                                                                                          | -                               | -                            | P_trifoliata_00195_mRNA_35.1    |
| GF0046619 | 0                            | 0                         | 1                            | Hypothetical protein (1)                                       |                                                                                                                                                                                                                                                                                                                                                             |                                                                                                                                                                                                                                                                                                                                                                                                                                                                                                                                                                                                                                                                                          | -                               | -                            | P_trifoliata_00195_mRNA_31.1    |
| GF0046618 | 0                            | 0                         | 1                            | Disease resistance RPS5-like protein (1)                       |                                                                                                                                                                                                                                                                                                                                                             | Leucine-rich repeat domain, L domain-like [IPR032675] (1)                                                                                                                                                                                                                                                                                                                                                                                                                                                                                                                                                                                                                                | -                               | -                            | P_trifoliata_00195_mRNA_30.1    |
| GF0046617 | 0                            | 0                         | 1                            | Hypothetical protein (1)                                       | ADP binding [GO:0043531 molecular_function] (1)                                                                                                                                                                                                                                                                                                             | NB-ARC [IPR002182] (1)                                                                                                                                                                                                                                                                                                                                                                                                                                                                                                                                                                                                                                                                   | -                               | -                            | P_trifoliata_00195_mRNA_29.1    |
| GF0046616 | 0                            | 0                         | 1                            | Hypothetical protein (1)                                       | ADP binding [GO:0043531 molecular_function] (1)                                                                                                                                                                                                                                                                                                             | P-loop containing nucleoside triphosphate hydrolase [IPR027417] (1); NB-ARC [IPR002182] (1)                                                                                                                                                                                                                                                                                                                                                                                                                                                                                                                                                                                              | -                               | -                            | P_trifoliata_00195_mRNA_24.1    |
| GF0046615 | 0                            | 0                         | 1                            | Hypothetical protein (1)                                       |                                                                                                                                                                                                                                                                                                                                                             |                                                                                                                                                                                                                                                                                                                                                                                                                                                                                                                                                                                                                                                                                          | -                               | -                            | P_trifoliata_00195_mRNA_23.1    |
| GF0046614 | 0                            | 0                         | 1                            | Hypothetical protein (1)                                       |                                                                                                                                                                                                                                                                                                                                                             |                                                                                                                                                                                                                                                                                                                                                                                                                                                                                                                                                                                                                                                                                          | -                               | -                            | P_trifoliata_00195_mRNA_19.1    |
| GF0046613 | 0                            | 0                         | 1                            | Hypothetical protein (1)                                       |                                                                                                                                                                                                                                                                                                                                                             |                                                                                                                                                                                                                                                                                                                                                                                                                                                                                                                                                                                                                                                                                          | -                               | -                            | P_trifoliata_00195_mRNA_17.1    |
| GF0046612 | 0                            | 0                         | 1                            | Hypothetical protein (1)                                       | protein phosphorylation [GO:0006468 biological_process] (1); protein kinase activity [GO:0004672 molecular_function] (1)                                                                                                                                                                                                                                    | Protein kinase-like domain [IPR011099] (1); Bulb-type lectin domain [IPR001480] (1); Serine/threonine/tyrosine-protein kinase catalytic domain [IPR001245] (1)                                                                                                                                                                                                                                                                                                                                                                                                                                                                                                                           | -                               | -                            | P_trifoliata_00195_mRNA_13.1    |
| GF0046611 | 0                            | 0                         | 1                            | Hypothetical protein (1)                                       |                                                                                                                                                                                                                                                                                                                                                             |                                                                                                                                                                                                                                                                                                                                                                                                                                                                                                                                                                                                                                                                                          | -                               | -                            | P_trifoliata_00195_mRNA_11.1    |
| GF0046610 | 0                            | 0                         | 1                            | Hypothetical protein (1)                                       |                                                                                                                                                                                                                                                                                                                                                             |                                                                                                                                                                                                                                                                                                                                                                                                                                                                                                                                                                                                                                                                                          | -                               | -                            | P_trifoliata_00195_mRNA_1.1     |
| GF0046609 | 0                            | 0                         | 1                            | Hypothetical protein (1)                                       |                                                                                                                                                                                                                                                                                                                                                             |                                                                                                                                                                                                                                                                                                                                                                                                                                                                                                                                                                                                                                                                                          | -                               | -                            | P_trifoliata_00194_mRNA_9.1     |
| GF0046608 | 0                            | 0                         | 1                            | Hypothetical protein (1)                                       |                                                                                                                                                                                                                                                                                                                                                             |                                                                                                                                                                                                                                                                                                                                                                                                                                                                                                                                                                                                                                                                                          | -                               | -                            | P_trifoliata_00194_mRNA_8.1     |
| GF0046607 | 0                            | 0                         | 1                            | Hypothetical protein (1)                                       |                                                                                                                                                                                                                                                                                                                                                             |                                                                                                                                                                                                                                                                                                                                                                                                                                                                                                                                                                                                                                                                                          | -                               | -                            | P_trifoliata_00194_mRNA_63.1    |
| GF0046606 | 0                            | 0                         | 1                            | Hypothetical protein (1)                                       |                                                                                                                                                                                                                                                                                                                                                             |                                                                                                                                                                                                                                                                                                                                                                                                                                                                                                                                                                                                                                                                                          | -                               | -                            | P_trifoliata_00194_mRNA_59.1    |
| GF0046605 | 0                            | 0                         | 1                            | Hypothetical protein (1)                                       | ADP binding [GO:0043531 molecular_function] (1)                                                                                                                                                                                                                                                                                                             | NB-ARC [IPR002182] (1); P-loop containing nucleoside triphosphate hydrolase [IPR027417] (1)                                                                                                                                                                                                                                                                                                                                                                                                                                                                                                                                                                                              | -                               | -                            | P_trifoliata_00194_mRNA_57.1    |
| GF0046604 | 0                            | 0                         | 1                            | Hypothetical protein (1)                                       |                                                                                                                                                                                                                                                                                                                                                             | Gag polyprotein of LTR copia-type [IPR029472] (1)                                                                                                                                                                                                                                                                                                                                                                                                                                                                                                                                                                                                                                        | -                               | -                            | P_trifoliata_00194_mRNA_55.1    |
| GF0046603 | 0                            | 0                         | 1                            | Hypothetical protein (1)                                       | oxidation-reduction process [GO:005114 biological_process] (1); oxidoreductase activity, acting on single donors with incorporation of molecular oxygen, incorporation of two atoms of oxygen [GO:0016702 molecular_function] (1); protein binding [GO:0005515 molecular_function] (1); metal ion binding [GO:0046872 molecular_function] (1)               | PLAT/LHD domain [IPR01024] (1); Lipoygenase [IPR000907] (1)                                                                                                                                                                                                                                                                                                                                                                                                                                                                                                                                                                                                                              | -                               | -                            | P_trifoliata_00194_mRNA_53.1    |
| GF0046602 | 0                            | 0                         | 1                            | Hypothetical protein (1)                                       |                                                                                                                                                                                                                                                                                                                                                             |                                                                                                                                                                                                                                                                                                                                                                                                                                                                                                                                                                                                                                                                                          | -                               | -                            | P_trifoliata_00194_mRNA_49.1    |
| GF0046601 | 0                            | 0                         | 1                            | Hypothetical protein (1)                                       |                                                                                                                                                                                                                                                                                                                                                             |                                                                                                                                                                                                                                                                                                                                                                                                                                                                                                                                                                                                                                                                                          | -                               | -                            | P_trifoliata_00194_mRNA_48.1    |
| GF0046600 | 0                            | 0                         | 1                            | Hypothetical protein (1)                                       |                                                                                                                                                                                                                                                                                                                                                             |                                                                                                                                                                                                                                                                                                                                                                                                                                                                                                                                                                                                                                                                                          | -                               | -                            | P_trifoliata_00194_mRNA_47.1    |
| GF0046599 | 0                            | 0                         | 1                            | Pentatricopeptide repeat-containing protein, chloroplastic (1) |                                                                                                                                                                                                                                                                                                                                                             | Pentatricopeptide repeat [IPR002885] (1)                                                                                                                                                                                                                                                                                                                                                                                                                                                                                                                                                                                                                                                 | -                               | -                            | P_trifoliata_00194_mRNA_46.1    |
| GF0046598 | 0                            | 0                         | 1                            | Hypothetical protein (1)                                       |                                                                                                                                                                                                                                                                                                                                                             |                                                                                                                                                                                                                                                                                                                                                                                                                                                                                                                                                                                                                                                                                          | -                               | -                            | P_trifoliata_00194_mRNA_45.1    |
| GF0046597 | 0                            | 0                         | 1                            | Peroxidase 4 (1)                                               | peroxidase activity [GO:0004601 molecular_function] (1); oxidation-reduction process [GO:005114 biological_process] (1); heme binding [GO:0020037 molecular_function] (1); response to oxidative stress [GO:0006979 biological_process] (1)                                                                                                                 | Haem peroxidase [IPR010255] (1); Peroxidase, active site [IPR019794] (1); Plant peroxidase [IPR000823] (1); Haem peroxidase, plant/fungal/bacterial [IPR02016] (1)                                                                                                                                                                                                                                                                                                                                                                                                                                                                                                                       | -                               | -                            | P_trifoliata_00194_mRNA_44.1    |
| GF0046596 | 0                            | 0                         | 1                            | Cytokinin riboside 5'-monophosphate phosphatohydrolase (1)     |                                                                                                                                                                                                                                                                                                                                                             | LOG family [IPR031100] (1)                                                                                                                                                                                                                                                                                                                                                                                                                                                                                                                                                                                                                                                               | -                               | -                            | P_trifoliata_00194_mRNA_41.1    |
| GF0046595 | 0                            | 0                         | 1                            | Hypothetical protein (1)                                       |                                                                                                                                                                                                                                                                                                                                                             |                                                                                                                                                                                                                                                                                                                                                                                                                                                                                                                                                                                                                                                                                          | -                               | -                            | P_trifoliata_00194_mRNA_40.1    |
| GF0046594 | 0                            | 0                         | 1                            | Hypothetical protein (1)                                       |                                                                                                                                                                                                                                                                                                                                                             |                                                                                                                                                                                                                                                                                                                                                                                                                                                                                                                                                                                                                                                                                          | -                               | -                            | P_trifoliata_00194_mRNA_38.1    |
| GF0046593 | 0                            | 0                         | 1                            | Hypothetical protein (1)                                       |                                                                                                                                                                                                                                                                                                                                                             |                                                                                                                                                                                                                                                                                                                                                                                                                                                                                                                                                                                                                                                                                          | -                               | -                            | P_trifoliata_00194_mRNA_35.1    |
| GF0046592 | 0                            | 0                         | 1                            | Hypothetical protein (1)                                       |                                                                                                                                                                                                                                                                                                                                                             |                                                                                                                                                                                                                                                                                                                                                                                                                                                                                                                                                                                                                                                                                          | -                               | -                            | P_trifoliata_00194_mRNA_3.1     |
| GF0046591 | 0                            | 0                         | 1                            | Hypothetical protein (1)                                       | structural constituent of ribosome [GO:0003735 molecular_function] (1); translation [GO:0006412 biological_process] (1); large ribosomal subunit [GO:0015934 cellular_component] (1); metabolic process [GO:0008152 biological_process] (1); hydrolase activity [GO:0016787 molecular_function] (1); hydrolase activity [GO:0016787 molecular_function] (1) | Ribosomal protein L26/L24P, eukaryotic/archaeal [IPR005756] (1); Ribosomal protein L2 domain 2 [IPR014722] (1); Translation protein SH3-like domain [IPR008991] (1); Alpha/beta hydrolase fold-3 [IPR013094] (1); Alpha/Beta hydrolase fold [IPR029058] (1)                                                                                                                                                                                                                                                                                                                                                                                                                              | -                               | -                            | P_trifoliata_00194_mRNA_28.1    |
| GF0046590 | 0                            | 0                         | 1                            | Putative carboxylesterase 18 (1)                               |                                                                                                                                                                                                                                                                                                                                                             | Alpha/beta hydrolase fold-3 [IPR013094] (1); Alpha/Beta hydrolase fold [IPR029058] (1)                                                                                                                                                                                                                                                                                                                                                                                                                                                                                                                                                                                                   | -                               | -                            | P_trifoliata_00194_mRNA_26.1    |
| GF0046589 | 0                            | 0                         | 1                            | Carboxylesterase 18, putative (1)                              |                                                                                                                                                                                                                                                                                                                                                             | Alpha/beta hydrolase fold-3 [IPR013094] (1); Alpha/Beta hydrolase fold [IPR029058] (1)                                                                                                                                                                                                                                                                                                                                                                                                                                                                                                                                                                                                   | -                               | -                            | P_trifoliata_00194_mRNA_25.1    |
| GF0046588 | 0                            | 0                         | 1                            | Receptor like protein 21 (1)                                   |                                                                                                                                                                                                                                                                                                                                                             | Leucine-rich repeat domain, L domain-like [IPR032675] (1); Leucine-rich repeat-containing N-terminal, plant-type [IPR013210] (1)                                                                                                                                                                                                                                                                                                                                                                                                                                                                                                                                                         | -                               | -                            | P_trifoliata_00194_mRNA_23.1    |
| GF0046587 | 0                            | 0                         | 1                            | Hypothetical protein (1)                                       |                                                                                                                                                                                                                                                                                                                                                             |                                                                                                                                                                                                                                                                                                                                                                                                                                                                                                                                                                                                                                                                                          | -                               | -                            | P_trifoliata_00194_mRNA_2.1     |
| GF0046586 | 0                            | 0                         | 1                            | Onabain (1)                                                    |                                                                                                                                                                                                                                                                                                                                                             | Transcription factor AFT [IPR014842] (1)                                                                                                                                                                                                                                                                                                                                                                                                                                                                                                                                                                                                                                                 | -                               | -                            | P_trifoliata_00194_mRNA_11.1    |
| GF0046585 | 0                            | 0                         | 1                            | Hypothetical protein (1)                                       |                                                                                                                                                                                                                                                                                                                                                             |                                                                                                                                                                                                                                                                                                                                                                                                                                                                                                                                                                                                                                                                                          | -                               | -                            | P_trifoliata_00194_mRNA_1.1     |
| GF0046584 | 0                            | 0                         | 1                            | Hypothetical protein (1)                                       |                                                                                                                                                                                                                                                                                                                                                             | Plant disease resistance response protein [IPR042625] (1)                                                                                                                                                                                                                                                                                                                                                                                                                                                                                                                                                                                                                                | -                               | -                            | P_trifoliata_00193_mRNA_9.1     |
| GF0046583 | 0                            | 0                         | 1                            | Hypothetical protein (1)                                       |                                                                                                                                                                                                                                                                                                                                                             | START-like domain [IPR023393] (1)                                                                                                                                                                                                                                                                                                                                                                                                                                                                                                                                                                                                                                                        | -                               | -                            | P_trifoliata_00193_mRNA_22.1    |
| GF0046582 | 0                            | 0                         | 1                            | Hypothetical protein (1)                                       |                                                                                                                                                                                                                                                                                                                                                             | GAG-pro-integrase domain [IPR025724] (1)                                                                                                                                                                                                                                                                                                                                                                                                                                                                                                                                                                                                                                                 | -                               | -                            | P_trifoliata_00193_mRNA_69.1    |
| GF0046581 | 0                            | 0                         | 1                            | Hypothetical protein (1)                                       |                                                                                                                                                                                                                                                                                                                                                             |                                                                                                                                                                                                                                                                                                                                                                                                                                                                                                                                                                                                                                                                                          | -                               | -                            | P_trifoliata_00193_mRNA_4.1     |
| GF0046580 | 0                            | 0                         | 1                            | 60S ribosomal protein L29-1 (1)                                | ribosome [GO:0005840 cellular_component] (1); intracellular [GO:0005622 cellular_component] (1); translation [GO:0006412 biological_process] (1); structural constituent of ribosome [GO:0003735 molecular_function] (1)                                                                                                                                    | Ribosomal protein L29e [IPR002673] (1)                                                                                                                                                                                                                                                                                                                                                                                                                                                                                                                                                                                                                                                   | -                               | -                            | P_trifoliata_00193_mRNA_36.1    |
| GF0046579 | 0                            | 0                         | 1                            | Hypothetical protein (1)                                       |                                                                                                                                                                                                                                                                                                                                                             | Glycosyl hydrolases 36 [IPR008811] (1)                                                                                                                                                                                                                                                                                                                                                                                                                                                                                                                                                                                                                                                   | -                               | -                            | P_trifoliata_00193_mRNA_26.1    |
| GF0046578 | 0                            | 0                         | 1                            | Hypothetical protein (1)                                       |                                                                                                                                                                                                                                                                                                                                                             | HSP20-like chaperone [IPR008978] (1); Alpha crystallin/Hsp20 domain [IPR002068] (1); Small heat shock protein HSP20 [IPR031107] (1)                                                                                                                                                                                                                                                                                                                                                                                                                                                                                                                                                      | -                               | -                            | P_trifoliata_00193_mRNA_16.1    |
| GF0046577 | 0                            | 0                         | 1                            | 17.9 kDa class II heat shock protein (1)                       |                                                                                                                                                                                                                                                                                                                                                             | Alpha crystallin/Hsp20 domain [IPR002068] (1); Small heat shock protein HSP20 [IPR031107] (1)                                                                                                                                                                                                                                                                                                                                                                                                                                                                                                                                                                                            | -                               | -                            | P_trifoliata_00192_mRNA_6.1     |
| GF0046576 | 0                            | 0                         | 1                            | Hypothetical protein (1)                                       | iron ion binding [GO:0005506 molecular_function] (1); heme binding [GO:0020037 molecular_function] (1); oxidoreductase activity, acting on paired donors, with incorporation or reduction of molecular oxygen [GO:0016705 molecular_function] (1); oxidation-reduction process [GO:005114 biological_process] (1)                                           | Cytochrome P450, E-class, group I [IPR002401] (1); Cytochrome P450 [IPR001128] (1)                                                                                                                                                                                                                                                                                                                                                                                                                                                                                                                                                                                                       | -                               | -                            | P_trifoliata_00192_mRNA_29.1    |

| ID        | Num. in <i>C. clementiae</i> | Num. in <i>C. canthii</i> | Num. in <i>P. trifoliatum</i> | Note                                                       | GO                                                                                                                                                                                                                                                                                                                                                                             | InterPro                                                                                                                                                                                                                   | Members in <i>C. clementiae</i> | Members in <i>C. canthii</i> | Members in <i>P. trifoliatum</i> |
|-----------|------------------------------|---------------------------|-------------------------------|------------------------------------------------------------|--------------------------------------------------------------------------------------------------------------------------------------------------------------------------------------------------------------------------------------------------------------------------------------------------------------------------------------------------------------------------------|----------------------------------------------------------------------------------------------------------------------------------------------------------------------------------------------------------------------------|---------------------------------|------------------------------|----------------------------------|
| GF0046575 | 0                            | 0                         | 1                             | Cytochrome P450 89A2 (1)                                   | iron ion binding [GO:0005506 molecular_function] (1); heme binding [GO:0020037 molecular_function] (1); monooxygenase activity [GO:0004497 molecular_function] (1); oxidation-reduction process [GO:0055114 biological_process] (1); oxidoreductase activity, acting on paired donors, with incorporation or reduction of molecular oxygen [GO:0016705 molecular_function] (1) | Cytochrome P450, conserved site [IPR017972] (1); Cytochrome P450 [IPR001128] (1); Cytochrome P450, E-class, group IV [IPR002403] (1)                                                                                       | -                               | -                            | P_trifoliata_00192_mRNA_28.1     |
| GF0046574 | 0                            | 0                         | 1                             | Hypothetical protein (1)                                   |                                                                                                                                                                                                                                                                                                                                                                                |                                                                                                                                                                                                                            |                                 |                              | P_trifoliata_00192_mRNA_26.1     |
| GF0046573 | 0                            | 0                         | 1                             | Hypothetical protein (1)                                   |                                                                                                                                                                                                                                                                                                                                                                                |                                                                                                                                                                                                                            |                                 |                              | P_trifoliata_00192_mRNA_25.1     |
| GF0046572 | 0                            | 0                         | 1                             | Hypothetical protein (1)                                   | heme binding [GO:0020037 molecular_function] (1); iron ion binding [GO:0005506 molecular_function] (1); oxidoreductase activity, acting on paired donors, with incorporation or reduction of molecular oxygen [GO:0016705 molecular_function] (1); oxidation-reduction process [GO:0055114 biological_process] (1)                                                             | Cytochrome P450 [IPR001128] (1); Cytochrome P450, E-class, group I [IPR002401] (1); Cytochrome P450, conserved site [IPR017972] (1)                                                                                        |                                 |                              | P_trifoliata_00192_mRNA_24.1     |
| GF0046571 | 0                            | 0                         | 1                             | Hypothetical protein (1)                                   |                                                                                                                                                                                                                                                                                                                                                                                | Zinc knuckle CX2CX4HX4C [IPR025836] (1); Reverse transcriptase zinc-binding domain [IPR026960] (1)                                                                                                                         |                                 |                              | P_trifoliata_00192_mRNA_23.1     |
| GF0046570 | 0                            | 0                         | 1                             | Cytochrome P450, family 87, subfamily A, polypeptide 6 (1) | oxidation-reduction process [GO:0055114 biological_process] (1); oxidoreductase activity, acting on paired donors, with incorporation or reduction of molecular oxygen [GO:0016705 molecular_function] (1); iron ion binding [GO:0005506 molecular_function] (1); heme binding [GO:0020037 molecular_function] (1)                                                             | Cytochrome P450, conserved site [IPR017972] (1); Cytochrome P450, E-class, group I [IPR002401] (1); Cytochrome P450 [IPR001128] (1)                                                                                        |                                 |                              | P_trifoliata_00192_mRNA_20.1     |
| GF0046569 | 0                            | 0                         | 1                             | Hypothetical protein (1)                                   |                                                                                                                                                                                                                                                                                                                                                                                |                                                                                                                                                                                                                            |                                 |                              | P_trifoliata_00192_mRNA_2.1      |
| GF0046568 | 0                            | 0                         | 1                             | Hypothetical protein (1)                                   |                                                                                                                                                                                                                                                                                                                                                                                | Transposase, MuDR, plant [IPR004332] (1)                                                                                                                                                                                   |                                 |                              | P_trifoliata_00192_mRNA_14.1     |
| GF0046567 | 0                            | 0                         | 1                             | Hypothetical protein (1)                                   |                                                                                                                                                                                                                                                                                                                                                                                |                                                                                                                                                                                                                            |                                 |                              | P_trifoliata_00192_mRNA_12.1     |
| GF0046566 | 0                            | 0                         | 1                             | Hypothetical protein (1)                                   |                                                                                                                                                                                                                                                                                                                                                                                |                                                                                                                                                                                                                            |                                 |                              | P_trifoliata_00191_mRNA_47.1     |
| GF0046565 | 0                            | 0                         | 1                             | Hypothetical protein (1)                                   |                                                                                                                                                                                                                                                                                                                                                                                |                                                                                                                                                                                                                            |                                 |                              | P_trifoliata_00191_mRNA_46.1     |
| GF0046564 | 0                            | 0                         | 1                             | Hypothetical protein (1)                                   |                                                                                                                                                                                                                                                                                                                                                                                |                                                                                                                                                                                                                            |                                 |                              | P_trifoliata_00191_mRNA_35.1     |
| GF0046563 | 0                            | 0                         | 1                             | Hypothetical protein (1)                                   |                                                                                                                                                                                                                                                                                                                                                                                |                                                                                                                                                                                                                            |                                 |                              | P_trifoliata_00191_mRNA_34.1     |
| GF0046562 | 0                            | 0                         | 1                             | Hypothetical protein (1)                                   |                                                                                                                                                                                                                                                                                                                                                                                | Transposase, MuDR, plant [IPR004332] (1)                                                                                                                                                                                   |                                 |                              | P_trifoliata_00191_mRNA_32.1     |
| GF0046561 | 0                            | 0                         | 1                             | Hypothetical protein (1)                                   | oxidoreductase activity [GO:0016491 molecular_function] (1); oxidation-reduction process [GO:0055114 biological_process] (1)                                                                                                                                                                                                                                                   | Oxoglutarate/iron-dependent dioxygenase [IPR005123] (1); Isopenicillin N synthase-like [IPR027443] (1)                                                                                                                     |                                 |                              | P_trifoliata_00191_mRNA_30.1     |
| GF0046560 | 0                            | 0                         | 1                             | Hypothetical protein (1)                                   | isotropic glutamate receptor activity [GO:0004970 molecular_function] (1); membrane [GO:0016020 cellular_component] (1)                                                                                                                                                                                                                                                        | Periplasmic binding protein-like 1 [IPR028082] (1); Receptor, ligand binding region [IPR001828] (1); Isotropic glutamate receptor [IPR001320] (1); Solute-binding protein family 3N-terminal domain of Mif [IPR001638] (1) |                                 |                              | P_trifoliata_00191_mRNA_3.1      |
| GF0046559 | 0                            | 0                         | 1                             | Hypothetical protein (1)                                   |                                                                                                                                                                                                                                                                                                                                                                                |                                                                                                                                                                                                                            |                                 |                              | P_trifoliata_00191_mRNA_29.1     |
| GF0046558 | 0                            | 0                         | 1                             | Hypothetical protein (1)                                   |                                                                                                                                                                                                                                                                                                                                                                                |                                                                                                                                                                                                                            |                                 |                              | P_trifoliata_00191_mRNA_24.1     |
| GF0046557 | 0                            | 0                         | 1                             | Hypothetical protein (1)                                   |                                                                                                                                                                                                                                                                                                                                                                                |                                                                                                                                                                                                                            |                                 |                              | P_trifoliata_00191_mRNA_20.1     |
| GF0046556 | 0                            | 0                         | 1                             | Hypothetical protein (1)                                   |                                                                                                                                                                                                                                                                                                                                                                                |                                                                                                                                                                                                                            |                                 |                              | P_trifoliata_00191_mRNA_2.1      |
| GF0046555 | 0                            | 0                         | 1                             | UDP-glycosyltransferase 74B1 (1)                           | metabolic process [GO:0008152 biological_process] (1); transferase activity, transferring hexosyl groups [GO:0016758 molecular_function] (1)                                                                                                                                                                                                                                   | UDP-galacturonoyl/UDP-galucosyltransferase [IPR002213] (1)                                                                                                                                                                 |                                 |                              | P_trifoliata_00191_mRNA_18.1     |
| GF0046554 | 0                            | 0                         | 1                             | Hypothetical protein (1)                                   | metabolic process [GO:0008152 biological_process] (1); transferase activity, transferring hexosyl groups [GO:0016758 molecular_function] (1)                                                                                                                                                                                                                                   | UDP-galacturonoyl/UDP-galucosyltransferase [IPR002213] (1)                                                                                                                                                                 |                                 |                              | P_trifoliata_00191_mRNA_16.1     |
| GF0046553 | 0                            | 0                         | 1                             | UDP-glycosyltransferase 74E2 (1)                           | metabolic process [GO:0008152 biological_process] (1); transferase activity, transferring hexosyl groups [GO:0016758 molecular_function] (1)                                                                                                                                                                                                                                   | UDP-galacturonoyl/UDP-galucosyltransferase [IPR002213] (1)                                                                                                                                                                 |                                 |                              | P_trifoliata_00191_mRNA_15.1     |
| GF0046552 | 0                            | 0                         | 1                             | UDP-glycosyltransferase 74E2 (1)                           | metabolic process [GO:0008152 biological_process] (1); transferase activity, transferring hexosyl groups [GO:0016758 molecular_function] (1)                                                                                                                                                                                                                                   | UDP-galacturonoyl/UDP-galucosyltransferase [IPR002213] (1)                                                                                                                                                                 |                                 |                              | P_trifoliata_00191_mRNA_14.1     |
| GF0046551 | 0                            | 0                         | 1                             | Hypothetical protein (1)                                   |                                                                                                                                                                                                                                                                                                                                                                                |                                                                                                                                                                                                                            |                                 |                              | P_trifoliata_00191_mRNA_1.1      |
| GF0046550 | 0                            | 0                         | 1                             | B3 domain-containing protein At1g49475 (1)                 | DNA binding [GO:0003677 molecular_function] (1)                                                                                                                                                                                                                                                                                                                                | DNA-binding pseudobarrel domain [IPR015300] (1); B3 DNA binding domain [IPR003340] (1)                                                                                                                                     |                                 |                              | P_trifoliata_00190_mRNA_6.1      |
| GF0046549 | 0                            | 0                         | 1                             | Hypothetical protein (1)                                   |                                                                                                                                                                                                                                                                                                                                                                                |                                                                                                                                                                                                                            |                                 |                              | P_trifoliata_00190_mRNA_52.1     |
| GF0046548 | 0                            | 0                         | 1                             | Hypothetical protein (1)                                   |                                                                                                                                                                                                                                                                                                                                                                                |                                                                                                                                                                                                                            |                                 |                              | P_trifoliata_00190_mRNA_50.1     |
| GF0046547 | 0                            | 0                         | 1                             | Hypothetical protein (1)                                   |                                                                                                                                                                                                                                                                                                                                                                                |                                                                                                                                                                                                                            |                                 |                              | P_trifoliata_00190_mRNA_5.1      |
| GF0046546 | 0                            | 0                         | 1                             | Hypothetical protein (1)                                   |                                                                                                                                                                                                                                                                                                                                                                                |                                                                                                                                                                                                                            |                                 |                              | P_trifoliata_00190_mRNA_42.1     |
| GF0046545 | 0                            | 0                         | 1                             | Hypothetical protein (1)                                   |                                                                                                                                                                                                                                                                                                                                                                                |                                                                                                                                                                                                                            |                                 |                              | P_trifoliata_00190_mRNA_39.1     |
| GF0046544 | 0                            | 0                         | 1                             | Hypothetical protein (1)                                   |                                                                                                                                                                                                                                                                                                                                                                                |                                                                                                                                                                                                                            |                                 |                              | P_trifoliata_00190_mRNA_38.1     |
| GF0046543 | 0                            | 0                         | 1                             | Hypothetical protein (1)                                   |                                                                                                                                                                                                                                                                                                                                                                                |                                                                                                                                                                                                                            |                                 |                              | P_trifoliata_00190_mRNA_32.1     |
| GF0046542 | 0                            | 0                         | 1                             | Hypothetical protein (1)                                   |                                                                                                                                                                                                                                                                                                                                                                                |                                                                                                                                                                                                                            |                                 |                              | P_trifoliata_00190_mRNA_31.1     |
| GF0046541 | 0                            | 0                         | 1                             | B3 domain-containing transcription factor VRN1 (1)         | DNA binding [GO:0003677 molecular_function] (1)                                                                                                                                                                                                                                                                                                                                | DNA-binding pseudobarrel domain [IPR015300] (1); B3 DNA binding domain [IPR003340] (1)                                                                                                                                     |                                 |                              | P_trifoliata_00190_mRNA_3.1      |
| GF0046540 | 0                            | 0                         | 1                             | Hypothetical protein (1)                                   | regulation of transcription, DNA-templated [GO:0006355 biological_process] (1)                                                                                                                                                                                                                                                                                                 | FIEY3/ARI family [IPR031052] (1); MULE transposase domain [IPR018289] (1)                                                                                                                                                  |                                 |                              | P_trifoliata_00190_mRNA_25.1     |
| GF0046539 | 0                            | 0                         | 1                             | Hypothetical protein (1)                                   |                                                                                                                                                                                                                                                                                                                                                                                |                                                                                                                                                                                                                            |                                 |                              | P_trifoliata_00190_mRNA_20.1     |
| GF0046538 | 0                            | 0                         | 1                             | Hypothetical protein (1)                                   |                                                                                                                                                                                                                                                                                                                                                                                | Domain of unknown function DUF4283 [IPR05558] (1)                                                                                                                                                                          |                                 |                              | P_trifoliata_00190_mRNA_17.1     |
| GF0046537 | 0                            | 0                         | 1                             | Hypothetical protein (1)                                   |                                                                                                                                                                                                                                                                                                                                                                                |                                                                                                                                                                                                                            |                                 |                              | P_trifoliata_00190_mRNA_10.1     |
| GF0046536 | 0                            | 0                         | 1                             | Hypothetical protein (1)                                   | DNA binding [GO:0003677 molecular_function] (1)                                                                                                                                                                                                                                                                                                                                | B3 DNA binding domain [IPR003340] (1); DNA-binding pseudobarrel domain [IPR015300] (1)                                                                                                                                     |                                 |                              | P_trifoliata_00190_mRNA_1.1      |
| GF0046535 | 0                            | 0                         | 1                             | Hypothetical protein (1)                                   |                                                                                                                                                                                                                                                                                                                                                                                |                                                                                                                                                                                                                            |                                 |                              | P_trifoliata_00189_mRNA_40.1     |
| GF0046534 | 0                            | 0                         | 1                             | Hypothetical protein (1)                                   |                                                                                                                                                                                                                                                                                                                                                                                |                                                                                                                                                                                                                            |                                 |                              | P_trifoliata_00189_mRNA_35.1     |
| GF0046533 | 0                            | 0                         | 1                             | 50S ribosomal protein L12, chloroplast (1)                 | structural constituent of ribosome [GO:0003735 molecular_function] (1); translation [GO:0006412 biological_process] (1)                                                                                                                                                                                                                                                        | Ribosomal protein L7/L12, C-terminal [IPR013823] (1); Ribosomal protein L7/L12, C-terminal/adaptor protein Clp5-like [IPR014719] (1)                                                                                       |                                 |                              | P_trifoliata_00189_mRNA_12.1     |
| GF0046532 | 0                            | 0                         | 1                             | Hypothetical protein (1)                                   |                                                                                                                                                                                                                                                                                                                                                                                |                                                                                                                                                                                                                            |                                 |                              | P_trifoliata_00188_mRNA_7.1      |
| GF0046531 | 0                            | 0                         | 1                             | Hypothetical protein (1)                                   |                                                                                                                                                                                                                                                                                                                                                                                |                                                                                                                                                                                                                            |                                 |                              | P_trifoliata_00188_mRNA_6.1      |
| GF0046530 | 0                            | 0                         | 1                             | Hypothetical protein (1)                                   | nucleic acid binding [GO:0003676 molecular_function] (1)                                                                                                                                                                                                                                                                                                                       | Ribonuclease H-like domain [IPR012337] (1)                                                                                                                                                                                 |                                 |                              | P_trifoliata_00188_mRNA_5.1      |
| GF0046529 | 0                            | 0                         | 1                             | Glycoside hydrolase family 2 protein (1)                   | carbohydrate metabolic process [GO:0005975 biological_process] (1); hydrolase activity, hydrolyzing O-glycosyl compounds [GO:0004553 molecular_function] (1)                                                                                                                                                                                                                   | Galactose-binding domain-like [IPR008979] (1); Glycosyl hydrolases family 2, sugar binding domain [IPR006104] (1)                                                                                                          |                                 |                              | P_trifoliata_00188_mRNA_43.1     |
| GF0046528 | 0                            | 0                         | 1                             | Hypothetical protein (1)                                   | protein dimerization activity [GO:0046983 molecular_function] (1); nucleic acid binding [GO:0003676 molecular_function] (1)                                                                                                                                                                                                                                                    | Ribonuclease H-like domain [IPR012337] (1); HAT, C-terminal dimerization domain [IPR008906] (1)                                                                                                                            |                                 |                              | P_trifoliata_00188_mRNA_42.1     |
| GF0046527 | 0                            | 0                         | 1                             | Hypothetical protein (1)                                   | DNA binding [GO:0003677 molecular_function] (1)                                                                                                                                                                                                                                                                                                                                | Zinc finger, BED-type [IPR003656] (1)                                                                                                                                                                                      |                                 |                              | P_trifoliata_00188_mRNA_40.1     |
| GF0046526 | 0                            | 0                         | 1                             | Hypothetical protein (1)                                   |                                                                                                                                                                                                                                                                                                                                                                                | S-adenosyl-L-methionine-dependent methyltransferase [IPR029063] (1)                                                                                                                                                        |                                 |                              | P_trifoliata_00188_mRNA_4.1      |
| GF0046525 | 0                            | 0                         | 1                             | Hypothetical protein (1)                                   |                                                                                                                                                                                                                                                                                                                                                                                |                                                                                                                                                                                                                            |                                 |                              | P_trifoliata_00188_mRNA_38.1     |
| GF0046524 | 0                            | 0                         | 1                             | Hypothetical protein (1)                                   |                                                                                                                                                                                                                                                                                                                                                                                |                                                                                                                                                                                                                            |                                 |                              | P_trifoliata_00188_mRNA_36.1     |
| GF0046523 | 0                            | 0                         | 1                             | Hypothetical protein (1)                                   |                                                                                                                                                                                                                                                                                                                                                                                |                                                                                                                                                                                                                            |                                 |                              | P_trifoliata_00188_mRNA_35.1     |
| GF0046522 | 0                            | 0                         | 1                             | Hypothetical protein (1)                                   |                                                                                                                                                                                                                                                                                                                                                                                |                                                                                                                                                                                                                            |                                 |                              | P_trifoliata_00188_mRNA_33.1     |
| GF0046521 | 0                            | 0                         | 1                             | Hypothetical protein (1)                                   |                                                                                                                                                                                                                                                                                                                                                                                |                                                                                                                                                                                                                            |                                 |                              | P_trifoliata_00188_mRNA_31.1     |
| GF0046520 | 0                            | 0                         | 1                             | Hypothetical protein (1)                                   |                                                                                                                                                                                                                                                                                                                                                                                |                                                                                                                                                                                                                            |                                 |                              | P_trifoliata_00188_mRNA_3.1      |
| GF0046519 | 0                            | 0                         | 1                             | Hypothetical protein (1)                                   |                                                                                                                                                                                                                                                                                                                                                                                |                                                                                                                                                                                                                            |                                 |                              | P_trifoliata_00188_mRNA_29.1     |
| GF0046518 | 0                            | 0                         | 1                             | Hypothetical protein (1)                                   |                                                                                                                                                                                                                                                                                                                                                                                |                                                                                                                                                                                                                            |                                 |                              | P_trifoliata_00188_mRNA_26.1     |
| GF0046517 | 0                            | 0                         | 1                             | Hypothetical protein (1)                                   |                                                                                                                                                                                                                                                                                                                                                                                | Transposon, En/Spm-like [IPR004242] (1)                                                                                                                                                                                    |                                 |                              | P_trifoliata_00188_mRNA_13.1     |
| GF0046516 | 0                            | 0                         | 1                             | Hypothetical protein (1)                                   |                                                                                                                                                                                                                                                                                                                                                                                | Domain of unknown function DUF4218 [IPR054523] (1); Transposase-associated domain [IPR029480] (1)                                                                                                                          |                                 |                              | P_trifoliata_00188_mRNA_10.1     |
| GF0046515 | 0                            | 0                         | 1                             | Hypothetical protein (1)                                   |                                                                                                                                                                                                                                                                                                                                                                                |                                                                                                                                                                                                                            |                                 |                              | P_trifoliata_00187_mRNA_6.1      |
| GF0046514 | 0                            | 0                         | 1                             | Hypothetical protein (1)                                   |                                                                                                                                                                                                                                                                                                                                                                                |                                                                                                                                                                                                                            |                                 |                              | P_trifoliata_00187_mRNA_42.1     |
| GF0046513 | 0                            | 0                         | 1                             | Hypothetical protein (1)                                   | nucleic acid binding [GO:0003676 molecular_function] (1)                                                                                                                                                                                                                                                                                                                       | Ribonuclease H-like domain [IPR012337] (1)                                                                                                                                                                                 |                                 |                              | P_trifoliata_00187_mRNA_38.1     |
| GF0046512 | 0                            | 0                         | 1                             | Hypothetical protein (1)                                   |                                                                                                                                                                                                                                                                                                                                                                                |                                                                                                                                                                                                                            |                                 |                              | P_trifoliata_00187_mRNA_37.1     |
| GF0046511 | 0                            | 0                         | 1                             | Hypothetical protein (1)                                   | lipid binding [GO:0008289 molecular_function] (1); lipid transport [GO:0006869 biological_process] (1)                                                                                                                                                                                                                                                                         | Bifunctional inhibitor/plant lipid transfer protein/seed storage helical domain [IPR016100] (1); Plant lipid transfer protein/Par allergen [IPR000528] (1)                                                                 |                                 |                              | P_trifoliata_00187_mRNA_33.1     |
| GF0046510 | 0                            | 0                         | 1                             | Hypothetical protein (1)                                   |                                                                                                                                                                                                                                                                                                                                                                                |                                                                                                                                                                                                                            |                                 |                              | P_trifoliata_00187_mRNA_3.1      |
| GF0046509 | 0                            | 0                         | 1                             | Hypothetical protein (1)                                   |                                                                                                                                                                                                                                                                                                                                                                                |                                                                                                                                                                                                                            |                                 |                              | P_trifoliata_00187_mRNA_29.1     |

| ID        | Num. in <i>C. clementiae</i> | Num. in <i>C. canthii</i> | Num. in <i>P. trifoliata</i> | Note                                                        | GO                                                                                                                                                                                                                                       | InterPro                                                                                                                                                                                                                                                                              | Members in <i>C. clementiae</i> | Members in <i>C. canthii</i> | Members in <i>P. trifoliata</i> |
|-----------|------------------------------|---------------------------|------------------------------|-------------------------------------------------------------|------------------------------------------------------------------------------------------------------------------------------------------------------------------------------------------------------------------------------------------|---------------------------------------------------------------------------------------------------------------------------------------------------------------------------------------------------------------------------------------------------------------------------------------|---------------------------------|------------------------------|---------------------------------|
| GF0046508 | 0                            | 0                         | 1                            | Hypothetical protein (1)                                    |                                                                                                                                                                                                                                          |                                                                                                                                                                                                                                                                                       | -                               | -                            | P_trifoliata_00187_mRNA_28.1    |
| GF0046507 | 0                            | 0                         | 1                            | Hypothetical protein (1)                                    |                                                                                                                                                                                                                                          |                                                                                                                                                                                                                                                                                       | -                               | -                            | P_trifoliata_00187_mRNA_26.1    |
| GF0046506 | 0                            | 0                         | 1                            | Hypothetical protein (1)                                    |                                                                                                                                                                                                                                          |                                                                                                                                                                                                                                                                                       | -                               | -                            | P_trifoliata_00187_mRNA_21.1    |
| GF0046505 | 0                            | 0                         | 1                            | Hypothetical protein (1)                                    |                                                                                                                                                                                                                                          |                                                                                                                                                                                                                                                                                       | -                               | -                            | P_trifoliata_00187_mRNA_20.1    |
| GF0046504 | 0                            | 0                         | 1                            | Hypothetical protein (1)                                    |                                                                                                                                                                                                                                          |                                                                                                                                                                                                                                                                                       | -                               | -                            | P_trifoliata_00187_mRNA_15.1    |
| GF0046503 | 0                            | 0                         | 1                            | Aspartyl protease family protein, putative (1)              | proteolysis [GO:0006508] biological_process (1); aspartic-type endopeptidase activity [GO:0004190] molecular_function (1)                                                                                                                | Aspartic peptidase domain [IPRO21109] (1); Xylanase inhibitor, C-terminal [IPRO32799] (1); Aspartic peptidase A1 family [IPRO01461] (1)                                                                                                                                               | -                               | -                            | P_trifoliata_00187_mRNA_14.1    |
| GF0046502 | 0                            | 0                         | 1                            | Hypothetical protein (1)                                    |                                                                                                                                                                                                                                          |                                                                                                                                                                                                                                                                                       | -                               | -                            | P_trifoliata_00187_mRNA_12.1    |
| GF0046501 | 0                            | 0                         | 1                            | Nepenthesin II (1)                                          | proteolysis [GO:0006508] biological_process (1); aspartic-type endopeptidase activity [GO:0004190] molecular_function (1)                                                                                                                | Xylanase inhibitor, C-terminal [IPRO32799] (1); Xylanase inhibitor, N-terminal [IPRO32861] (1); Aspartic peptidase A1 family [IPRO01461] (1); Peptidase family A1 domain [IPRO33121] (1); Aspartic peptidase domain [IPRO21109] (1)                                                   | -                               | -                            | P_trifoliata_00187_mRNA_10.1    |
| GF0046500 | 0                            | 0                         | 1                            | Class I chitinase (1)                                       | chitinase activity [GO:0004568] molecular_function (1); chitin catabolic process [GO:0006032] biological_process (1); cell wall macromolecule catabolic process [GO:0016998] biological_process (1)                                      | Lysosyme-like domain [IPRO23346] (1); Glycoside hydrolase, family 19, catalytic [IPRO00726] (1)                                                                                                                                                                                       | -                               | -                            | P_trifoliata_00186_mRNA_64.1    |
| GF0046499 | 0                            | 0                         | 1                            | Hypothetical protein (1)                                    |                                                                                                                                                                                                                                          |                                                                                                                                                                                                                                                                                       | -                               | -                            | P_trifoliata_00186_mRNA_62.1    |
| GF0046498 | 0                            | 0                         | 1                            | Hypothetical protein (1)                                    |                                                                                                                                                                                                                                          |                                                                                                                                                                                                                                                                                       | -                               | -                            | P_trifoliata_00186_mRNA_59.1    |
| GF0046497 | 0                            | 0                         | 1                            | Protein spotted leaf 11 (1)                                 | protein ubiquitination [GO:0016567] biological_process (1); ubiquitin-protein transferase activity [GO:0004842] molecular_function (1); protein binding [GO:0005515] molecular_function (1); binding [GO:0005488] molecular_function (1) | U box domain [IPRO03613] (1); Armadillo [IPRO0225] (1); Zinc finger, RING-type [IPRO1981] (1); Armadillo-like helical [IPRO11989] (1); Armadillo-type fold [IPRO16024] (1)                                                                                                            | -                               | -                            | P_trifoliata_00186_mRNA_41.1    |
| GF0046496 | 0                            | 0                         | 1                            | Pantothenate kinase (1)                                     |                                                                                                                                                                                                                                          |                                                                                                                                                                                                                                                                                       | -                               | -                            | P_trifoliata_00186_mRNA_20.1    |
| GF0046495 | 0                            | 0                         | 1                            | CHL-interacting serine/threonine-protein kinase 21 (1)      | ATP binding [GO:0005524] molecular_function (1); protein phosphorylation [GO:0006468] biological_process (1); protein kinase activity [GO:0004672] molecular_function (1)                                                                | Serine/threonine dual specificity protein kinase, catalytic domain [IPRO02290] (1); Protein kinase, ATP binding site [IPRO17441] (1); Serine/threonine-protein kinase, active site [IPRO06271] (1); Protein kinase domain [IPRO00719] (1); Protein kinase-like domain [IPRO11009] (1) | -                               | -                            | P_trifoliata_00186_mRNA_1.1     |
| GF0046494 | 0                            | 0                         | 1                            | Hypothetical protein (1)                                    |                                                                                                                                                                                                                                          |                                                                                                                                                                                                                                                                                       | -                               | -                            | P_trifoliata_00185_mRNA_64.1    |
| GF0046493 | 0                            | 0                         | 1                            | Hypothetical protein (1)                                    | protein binding [GO:0005515] molecular_function (1)                                                                                                                                                                                      | Ubiquitin domain [IPRO00626] (1); Ubiquitin-related domain [IPRO29071] (1); Ubiquitin [IPRO19956] (1)                                                                                                                                                                                 | -                               | -                            | P_trifoliata_00185_mRNA_53.1    |
| GF0046492 | 0                            | 0                         | 1                            | Ankyrin repeat plant-like protein (1)                       |                                                                                                                                                                                                                                          |                                                                                                                                                                                                                                                                                       | -                               | -                            | P_trifoliata_00185_mRNA_46.1    |
| GF0046491 | 0                            | 0                         | 1                            | Hypothetical protein (1)                                    |                                                                                                                                                                                                                                          |                                                                                                                                                                                                                                                                                       | -                               | -                            | P_trifoliata_00185_mRNA_43.1    |
| GF0046490 | 0                            | 0                         | 1                            | Disease resistance protein (1)                              | protein binding [GO:0005515] molecular_function (1); ADP binding [GO:0043531] molecular_function (1)                                                                                                                                     | Penicilliopeptide repeat [IPRO02885] (1); Leucine-rich repeat domain, L domain-like [IPRO32675] (1); P-loop containing nucleoside triphosphate hydrolase [IPRO27417] (1); NB-ARC [IPRO02182] (1); Leucine-rich repeat [IPRO01611] (1)                                                 | -                               | -                            | P_trifoliata_00185_mRNA_4.1     |
| GF0046489 | 0                            | 0                         | 1                            | Hypothetical protein (1)                                    |                                                                                                                                                                                                                                          |                                                                                                                                                                                                                                                                                       | -                               | -                            | P_trifoliata_00185_mRNA_30.1    |
| GF0046488 | 0                            | 0                         | 1                            | Protein FARI-RELATED SEQUENCE 6 (1)                         | zinc ion binding [GO:0008270] molecular_function (1); regulation of transcription, DNA-templated [GO:0006355] biological_process (1)                                                                                                     | FHY3/FAR1 family [IPRO31052] (1); Zinc finger, PMZ-type [IPRO06564] (1); Zinc finger, SWIM-type [IPRO07527] (1)                                                                                                                                                                       | -                               | -                            | P_trifoliata_00185_mRNA_3.1     |
| GF0046487 | 0                            | 0                         | 1                            | Hypothetical protein (1)                                    |                                                                                                                                                                                                                                          |                                                                                                                                                                                                                                                                                       | -                               | -                            | P_trifoliata_00185_mRNA_28.1    |
| GF0046486 | 0                            | 0                         | 1                            | Hypothetical protein (1)                                    | transmembrane transport [GO:0055085] biological_process (1)                                                                                                                                                                              | Mitochondrial carrier protein [IPRO02067] (1); Mitochondrial carrier domain [IPRO2395] (1); Mitochondrial substrate/solute carrier [IPRO18108] (1)                                                                                                                                    | -                               | -                            | P_trifoliata_00185_mRNA_21.1    |
| GF0046485 | 0                            | 0                         | 1                            | Hypothetical protein (1)                                    |                                                                                                                                                                                                                                          |                                                                                                                                                                                                                                                                                       | -                               | -                            | P_trifoliata_00185_mRNA_18.1    |
| GF0046484 | 0                            | 0                         | 1                            | Hypothetical protein (1)                                    |                                                                                                                                                                                                                                          |                                                                                                                                                                                                                                                                                       | -                               | -                            | P_trifoliata_00185_mRNA_17.1    |
| GF0046483 | 0                            | 0                         | 1                            | Hypothetical protein (1)                                    |                                                                                                                                                                                                                                          |                                                                                                                                                                                                                                                                                       | -                               | -                            | P_trifoliata_00185_mRNA_16.1    |
| GF0046482 | 0                            | 0                         | 1                            | Hypothetical protein (1)                                    |                                                                                                                                                                                                                                          |                                                                                                                                                                                                                                                                                       | -                               | -                            | P_trifoliata_00185_mRNA_14.1    |
| GF0046481 | 0                            | 0                         | 1                            | Hypothetical protein (1)                                    |                                                                                                                                                                                                                                          |                                                                                                                                                                                                                                                                                       | -                               | -                            | P_trifoliata_00185_mRNA_1.1     |
| GF0046480 | 0                            | 0                         | 1                            | Nodulin Mn21 /EamA transporter family protein, putative (1) | integral component of membrane [GO:0016021] cellular_component (1); transmembrane transporter activity [GO:0022857] molecular_function (1)                                                                                               | WAT1-related protein [IPRO30184] (1)                                                                                                                                                                                                                                                  | -                               | -                            | P_trifoliata_00184_mRNA_56.1    |
| GF0046479 | 0                            | 0                         | 1                            | Hypothetical protein (1)                                    | integral component of membrane [GO:0016021] cellular_component (1); membrane [GO:0001602] cellular_component (1); transmembrane transporter activity [GO:0022857] molecular_function (1)                                                 | WAT1-related protein [IPRO30184] (1); EamA domain [IPRO00620] (1)                                                                                                                                                                                                                     | -                               | -                            | P_trifoliata_00184_mRNA_55.1    |
| GF0046478 | 0                            | 0                         | 1                            | Hypothetical protein (1)                                    |                                                                                                                                                                                                                                          |                                                                                                                                                                                                                                                                                       | -                               | -                            | P_trifoliata_00184_mRNA_54.1    |
| GF0046477 | 0                            | 0                         | 1                            | Nodulin Mn21/EamA-like transporter family protein (1)       | membrane [GO:0001602] cellular_component (1); transmembrane transporter activity [GO:0022857] molecular_function (1); integral component of membrane [GO:0016021] cellular_component (1)                                                 | WAT1-related protein [IPRO30184] (1); EamA domain [IPRO00620] (1)                                                                                                                                                                                                                     | -                               | -                            | P_trifoliata_00184_mRNA_53.1    |
| GF0046476 | 0                            | 0                         | 1                            | Hypothetical protein (1)                                    | serine-type endopeptidase activity [GO:0004322] molecular_function (1); proteolysis [GO:0006508] biological_process (1)                                                                                                                  | Peptidase S8/S53 domain [IPRO00209] (1); Peptidase S8, subtilisin-related [IPRO15500] (1)                                                                                                                                                                                             | -                               | -                            | P_trifoliata_00184_mRNA_50.1    |
| GF0046475 | 0                            | 0                         | 1                            | Hypothetical protein (1)                                    |                                                                                                                                                                                                                                          |                                                                                                                                                                                                                                                                                       | -                               | -                            | P_trifoliata_00184_mRNA_49.1    |
| GF0046474 | 0                            | 0                         | 1                            | Hypothetical protein (1)                                    |                                                                                                                                                                                                                                          |                                                                                                                                                                                                                                                                                       | -                               | -                            | P_trifoliata_00184_mRNA_44.1    |
| GF0046473 | 0                            | 0                         | 1                            | Hypothetical protein (1)                                    |                                                                                                                                                                                                                                          |                                                                                                                                                                                                                                                                                       | -                               | -                            | P_trifoliata_00184_mRNA_42.1    |
| GF0046472 | 0                            | 0                         | 1                            | Hypothetical protein (1)                                    |                                                                                                                                                                                                                                          |                                                                                                                                                                                                                                                                                       | -                               | -                            | P_trifoliata_00184_mRNA_41.1    |
| GF0046471 | 0                            | 0                         | 1                            | Hypothetical protein (1)                                    |                                                                                                                                                                                                                                          |                                                                                                                                                                                                                                                                                       | -                               | -                            | P_trifoliata_00184_mRNA_38.1    |
| GF0046470 | 0                            | 0                         | 1                            | Hypothetical protein (1)                                    |                                                                                                                                                                                                                                          |                                                                                                                                                                                                                                                                                       | -                               | -                            | P_trifoliata_00184_mRNA_32.1    |
| GF0046469 | 0                            | 0                         | 1                            | Hypothetical protein (1)                                    | regulation of transcription, DNA-templated [GO:0006355] biological_process (1)                                                                                                                                                           | FARI DNA binding domain [IPRO04330] (1); FHY3/FAR1 family [IPRO31052] (1)                                                                                                                                                                                                             | -                               | -                            | P_trifoliata_00184_mRNA_27.1    |
| GF0046468 | 0                            | 0                         | 1                            | Hypothetical protein (1)                                    |                                                                                                                                                                                                                                          |                                                                                                                                                                                                                                                                                       | -                               | -                            | P_trifoliata_00184_mRNA_21.1    |
| GF0046467 | 0                            | 0                         | 1                            | Glyoxal oxidase-related protein (1)                         |                                                                                                                                                                                                                                          |                                                                                                                                                                                                                                                                                       | -                               | -                            | P_trifoliata_00184_mRNA_17.1    |
| GF0046466 | 0                            | 0                         | 1                            | Hypothetical protein (1)                                    |                                                                                                                                                                                                                                          |                                                                                                                                                                                                                                                                                       | -                               | -                            | P_trifoliata_00183_mRNA_9.1     |
| GF0046465 | 0                            | 0                         | 1                            | Hypothetical protein (1)                                    |                                                                                                                                                                                                                                          |                                                                                                                                                                                                                                                                                       | -                               | -                            | P_trifoliata_00183_mRNA_8.1     |
| GF0046464 | 0                            | 0                         | 1                            | MADS-box transcription factor family protein (1)            |                                                                                                                                                                                                                                          |                                                                                                                                                                                                                                                                                       | -                               | -                            | P_trifoliata_00183_mRNA_4.1     |
| GF0046463 | 0                            | 0                         | 1                            | Hypothetical protein (1)                                    | nucleic acid binding [GO:0003676] molecular_function (1)                                                                                                                                                                                 | Ribonuclease H-like domain [IPRO12337] (1)                                                                                                                                                                                                                                            | -                               | -                            | P_trifoliata_00183_mRNA_39.1    |
| GF0046462 | 0                            | 0                         | 1                            | Hypothetical protein (1)                                    |                                                                                                                                                                                                                                          |                                                                                                                                                                                                                                                                                       | -                               | -                            | P_trifoliata_00183_mRNA_35.1    |
| GF0046461 | 0                            | 0                         | 1                            | Hypothetical protein (1)                                    |                                                                                                                                                                                                                                          |                                                                                                                                                                                                                                                                                       | -                               | -                            | P_trifoliata_00183_mRNA_33.1    |
| GF0046460 | 0                            | 0                         | 1                            | Hypothetical protein (1)                                    |                                                                                                                                                                                                                                          |                                                                                                                                                                                                                                                                                       | -                               | -                            | P_trifoliata_00183_mRNA_30.1    |
| GF0046459 | 0                            | 0                         | 1                            | Hypothetical protein (1)                                    |                                                                                                                                                                                                                                          |                                                                                                                                                                                                                                                                                       | -                               | -                            | P_trifoliata_00183_mRNA_29.1    |
| GF0046458 | 0                            | 0                         | 1                            | Hypothetical protein (1)                                    |                                                                                                                                                                                                                                          |                                                                                                                                                                                                                                                                                       | -                               | -                            | P_trifoliata_00183_mRNA_27.1    |
| GF0046457 | 0                            | 0                         | 1                            | Hypothetical protein (1)                                    |                                                                                                                                                                                                                                          |                                                                                                                                                                                                                                                                                       | -                               | -                            | P_trifoliata_00183_mRNA_26.1    |
| GF0046456 | 0                            | 0                         | 1                            | MADS-box transcription factor family protein (1)            | protein dimerization activity [GO:0046983] molecular_function (1); DNA binding [GO:0003677] molecular_function (1)                                                                                                                       | Transcription factor, MADS-box [IPRO02100] (1)                                                                                                                                                                                                                                        | -                               | -                            | P_trifoliata_00183_mRNA_20.1    |
| GF0046455 | 0                            | 0                         | 1                            | Hypothetical protein (1)                                    |                                                                                                                                                                                                                                          |                                                                                                                                                                                                                                                                                       | -                               | -                            | P_trifoliata_00183_mRNA_18.1    |
| GF0046454 | 0                            | 0                         | 1                            | Hypothetical protein (1)                                    |                                                                                                                                                                                                                                          |                                                                                                                                                                                                                                                                                       | -                               | -                            | P_trifoliata_00183_mRNA_17.1    |
| GF0046453 | 0                            | 0                         | 1                            | Hypothetical protein (1)                                    |                                                                                                                                                                                                                                          |                                                                                                                                                                                                                                                                                       | -                               | -                            | P_trifoliata_00183_mRNA_15.1    |
| GF0046452 | 0                            | 0                         | 1                            | Hypothetical protein (1)                                    |                                                                                                                                                                                                                                          |                                                                                                                                                                                                                                                                                       | -                               | -                            | P_trifoliata_00183_mRNA_13.1    |
| GF0046451 | 0                            | 0                         | 1                            | Hypothetical protein (1)                                    |                                                                                                                                                                                                                                          |                                                                                                                                                                                                                                                                                       | -                               | -                            | P_trifoliata_00183_mRNA_11.1    |
| GF0046450 | 0                            | 0                         | 1                            | Hypothetical protein (1)                                    |                                                                                                                                                                                                                                          |                                                                                                                                                                                                                                                                                       | -                               | -                            | P_trifoliata_00183_mRNA_10.1    |
| GF0046449 | 0                            | 0                         | 1                            | Hypothetical protein (1)                                    |                                                                                                                                                                                                                                          |                                                                                                                                                                                                                                                                                       | -                               | -                            | P_trifoliata_00182_mRNA_6.1     |
| GF0046448 | 0                            | 0                         | 1                            | Hypothetical protein (1)                                    |                                                                                                                                                                                                                                          |                                                                                                                                                                                                                                                                                       | -                               | -                            | P_trifoliata_00182_mRNA_5.1     |
| GF0046447 | 0                            | 0                         | 1                            | Hypothetical protein (1)                                    |                                                                                                                                                                                                                                          |                                                                                                                                                                                                                                                                                       | -                               | -                            | P_trifoliata_00182_mRNA_50.1    |
| GF0046446 | 0                            | 0                         | 1                            | Hypothetical protein (1)                                    | protein kinase activity [GO:0004672] molecular_function (1); protein phosphorylation [GO:0006468] biological_process (1); ATP binding [GO:0005524] molecular_function (1)                                                                | Serine/threonine tyrosine-protein kinase catalytic domain [IPRO12451] (1); Serine/threonine dual specificity protein kinase, catalytic domain [IPRO02290] (1); Protein kinase-like domain [IPRO11009] (1); Protein kinase domain [IPRO00719] (1)                                      | -                               | -                            | P_trifoliata_00182_mRNA_49.1    |
| GF0046445 | 0                            | 0                         | 1                            | Hypothetical protein (1)                                    |                                                                                                                                                                                                                                          |                                                                                                                                                                                                                                                                                       | -                               | -                            | P_trifoliata_00182_mRNA_48.1    |
| GF0046444 | 0                            | 0                         | 1                            | Hypothetical protein (1)                                    |                                                                                                                                                                                                                                          |                                                                                                                                                                                                                                                                                       | -                               | -                            | P_trifoliata_00182_mRNA_47.1    |
| GF0046443 | 0                            | 0                         | 1                            | Hypothetical protein (1)                                    |                                                                                                                                                                                                                                          |                                                                                                                                                                                                                                                                                       | -                               | -                            | P_trifoliata_00182_mRNA_45.1    |
| GF0046442 | 0                            | 0                         | 1                            | Hypothetical protein (1)                                    |                                                                                                                                                                                                                                          |                                                                                                                                                                                                                                                                                       | -                               | -                            | P_trifoliata_00182_mRNA_41.1    |
| GF0046441 | 0                            | 0                         | 1                            | Hypothetical protein (1)                                    |                                                                                                                                                                                                                                          |                                                                                                                                                                                                                                                                                       | -                               | -                            | P_trifoliata_00182_mRNA_40.1    |
| GF0046440 | 0                            | 0                         | 1                            | Hypothetical protein (1)                                    |                                                                                                                                                                                                                                          |                                                                                                                                                                                                                                                                                       | -                               | -                            | P_trifoliata_00182_mRNA_37.1    |

| ID        | Num. in <i>C. clementiae</i> | Num. in <i>C. unihii</i> | Num. in <i>P. trifoliata</i> | Note                                                       | GO                                                                                                                                                                                                                                                                                                                                                                                                                                                                                                                                                                                                                                                                                                                                                                                                                                                                                                                                                                                                                                                                                                                                                                                                                                                                                                                                                                                                                                                                                                                     | InterPro                                                                                                                                                                                                                                                                              | Members in <i>C. clementiae</i> | Members in <i>C. unihii</i> | Members in <i>P. trifoliata</i> |
|-----------|------------------------------|--------------------------|------------------------------|------------------------------------------------------------|------------------------------------------------------------------------------------------------------------------------------------------------------------------------------------------------------------------------------------------------------------------------------------------------------------------------------------------------------------------------------------------------------------------------------------------------------------------------------------------------------------------------------------------------------------------------------------------------------------------------------------------------------------------------------------------------------------------------------------------------------------------------------------------------------------------------------------------------------------------------------------------------------------------------------------------------------------------------------------------------------------------------------------------------------------------------------------------------------------------------------------------------------------------------------------------------------------------------------------------------------------------------------------------------------------------------------------------------------------------------------------------------------------------------------------------------------------------------------------------------------------------------|---------------------------------------------------------------------------------------------------------------------------------------------------------------------------------------------------------------------------------------------------------------------------------------|---------------------------------|-----------------------------|---------------------------------|
| GF0046439 | 0                            | 0                        | 1                            | Hypothetical protein (1)                                   | regulation of transcription, DNA-templated [GO:0006355]<br>biological_process (1)                                                                                                                                                                                                                                                                                                                                                                                                                                                                                                                                                                                                                                                                                                                                                                                                                                                                                                                                                                                                                                                                                                                                                                                                                                                                                                                                                                                                                                      | FHY3/FAR1 family [IPRO31052] (1);<br>FAR1 DNA binding domain [IPRO04330] (1)                                                                                                                                                                                                          | -                               | -                           | P_trifoliata_00182_mRNA_32.1    |
| GF0046438 | 0                            | 0                        | 1                            | Hypothetical protein (1)                                   | -                                                                                                                                                                                                                                                                                                                                                                                                                                                                                                                                                                                                                                                                                                                                                                                                                                                                                                                                                                                                                                                                                                                                                                                                                                                                                                                                                                                                                                                                                                                      | -                                                                                                                                                                                                                                                                                     | -                               | -                           | P_trifoliata_00182_mRNA_23.1    |
| GF0046437 | 0                            | 0                        | 1                            | Hypothetical protein (1)                                   | -                                                                                                                                                                                                                                                                                                                                                                                                                                                                                                                                                                                                                                                                                                                                                                                                                                                                                                                                                                                                                                                                                                                                                                                                                                                                                                                                                                                                                                                                                                                      | -                                                                                                                                                                                                                                                                                     | -                               | -                           | P_trifoliata_00182_mRNA_22.1    |
| GF0046436 | 0                            | 0                        | 1                            | Hypothetical protein (1)                                   | -                                                                                                                                                                                                                                                                                                                                                                                                                                                                                                                                                                                                                                                                                                                                                                                                                                                                                                                                                                                                                                                                                                                                                                                                                                                                                                                                                                                                                                                                                                                      | -                                                                                                                                                                                                                                                                                     | -                               | -                           | P_trifoliata_00182_mRNA_21.1    |
| GF0046435 | 0                            | 0                        | 1                            | Hypothetical protein (1)                                   | -                                                                                                                                                                                                                                                                                                                                                                                                                                                                                                                                                                                                                                                                                                                                                                                                                                                                                                                                                                                                                                                                                                                                                                                                                                                                                                                                                                                                                                                                                                                      | -                                                                                                                                                                                                                                                                                     | -                               | -                           | P_trifoliata_00182_mRNA_20.1    |
| GF0046434 | 0                            | 0                        | 1                            | Hypothetical protein (1)                                   | -                                                                                                                                                                                                                                                                                                                                                                                                                                                                                                                                                                                                                                                                                                                                                                                                                                                                                                                                                                                                                                                                                                                                                                                                                                                                                                                                                                                                                                                                                                                      | -                                                                                                                                                                                                                                                                                     | -                               | -                           | P_trifoliata_00182_mRNA_19.1    |
| GF0046433 | 0                            | 0                        | 1                            | Hypothetical protein (1)                                   | -                                                                                                                                                                                                                                                                                                                                                                                                                                                                                                                                                                                                                                                                                                                                                                                                                                                                                                                                                                                                                                                                                                                                                                                                                                                                                                                                                                                                                                                                                                                      | Leucine-rich repeat domain, L-domain-like [IPRO23675] (1)                                                                                                                                                                                                                             | -                               | -                           | P_trifoliata_00182_mRNA_18.1    |
| GF0046432 | 0                            | 0                        | 1                            | Hypothetical protein (1)                                   | -                                                                                                                                                                                                                                                                                                                                                                                                                                                                                                                                                                                                                                                                                                                                                                                                                                                                                                                                                                                                                                                                                                                                                                                                                                                                                                                                                                                                                                                                                                                      | -                                                                                                                                                                                                                                                                                     | -                               | -                           | P_trifoliata_00182_mRNA_15.1    |
| GF0046431 | 0                            | 0                        | 1                            | Hypothetical protein (1)                                   | -                                                                                                                                                                                                                                                                                                                                                                                                                                                                                                                                                                                                                                                                                                                                                                                                                                                                                                                                                                                                                                                                                                                                                                                                                                                                                                                                                                                                                                                                                                                      | -                                                                                                                                                                                                                                                                                     | -                               | -                           | P_trifoliata_00182_mRNA_11.1    |
| GF0046430 | 0                            | 0                        | 1                            | Hypothetical protein (1)                                   | -                                                                                                                                                                                                                                                                                                                                                                                                                                                                                                                                                                                                                                                                                                                                                                                                                                                                                                                                                                                                                                                                                                                                                                                                                                                                                                                                                                                                                                                                                                                      | -                                                                                                                                                                                                                                                                                     | -                               | -                           | P_trifoliata_00182_mRNA_1.1     |
| GF0046429 | 0                            | 0                        | 1                            | Hypothetical protein (1)                                   | -                                                                                                                                                                                                                                                                                                                                                                                                                                                                                                                                                                                                                                                                                                                                                                                                                                                                                                                                                                                                                                                                                                                                                                                                                                                                                                                                                                                                                                                                                                                      | -                                                                                                                                                                                                                                                                                     | -                               | -                           | P_trifoliata_00181_mRNA_46.1    |
| GF0046428 | 0                            | 0                        | 1                            | Hypothetical protein (1)                                   | zinc ion binding [GO:0008270]<br>molecular_function (1)<br>iron ion binding [GO:0005506]<br>molecular_function (1); heme binding [GO:0020037]<br>molecular_function (1); oxidoreductase activity, acting on paired donors, with incorporation or reduction of molecular oxygen [GO:0016705]<br>molecular_function (1); oxidation-reduction process [GO:0055114]<br>biological_process (1)<br>oxidoreductase activity, acting on paired donors, with incorporation or reduction of molecular oxygen [GO:0016705]<br>molecular_function (1); oxidation-reduction process [GO:0055114]<br>biological_process (1); heme binding [GO:0020037]<br>molecular_function (1); iron ion binding [GO:0005506]<br>molecular_function (1)<br>phosphate-containing compound metabolic process [GO:0006796]<br>biological_process (1); inorganic diphosphatase activity [GO:0004427]<br>molecular_function (1); cytoplasm [GO:0005737]<br>cellular_component (1); magnesium ion binding [GO:0000287]<br>molecular_function (1)<br>cytoplasm [GO:0005737]<br>cellular_component (1); phosphate-containing compound metabolic process [GO:0006796]<br>biological_process (1); inorganic diphosphatase activity [GO:0004427]<br>molecular_function (1); magnesium ion binding [GO:0000287]<br>molecular_function (1)<br>protein retention in ER lumen [GO:0006621]<br>biological_process (1); integral component of membrane [GO:0016021]<br>cellular_component (1); ER retention sequence binding [GO:0046923]<br>molecular_function (1) | Zinc finger, FMZ-type [IPRO06564] (1)                                                                                                                                                                                                                                                 | -                               | -                           | P_trifoliata_00181_mRNA_39.1    |
| GF0046427 | 0                            | 0                        | 1                            | Cytochrome P450 83B1 (1)                                   | -                                                                                                                                                                                                                                                                                                                                                                                                                                                                                                                                                                                                                                                                                                                                                                                                                                                                                                                                                                                                                                                                                                                                                                                                                                                                                                                                                                                                                                                                                                                      | Cytochrome P450, E-class, group I [IPRO02401] (1); Cytochrome P450 [IPRO01128] (1)                                                                                                                                                                                                    | -                               | -                           | P_trifoliata_00181_mRNA_38.1    |
| GF0046426 | 0                            | 0                        | 1                            | Cytochrome P450 family 71 protein (1)                      | -                                                                                                                                                                                                                                                                                                                                                                                                                                                                                                                                                                                                                                                                                                                                                                                                                                                                                                                                                                                                                                                                                                                                                                                                                                                                                                                                                                                                                                                                                                                      | Cytochrome P450, conserved site [IPRO17972] (1); Cytochrome P450, E-class, group I [IPRO2401] (1); Cytochrome P450 [IPRO01128] (1)                                                                                                                                                    | -                               | -                           | P_trifoliata_00181_mRNA_37.1    |
| GF0046425 | 0                            | 0                        | 1                            | IPYR (1)                                                   | -                                                                                                                                                                                                                                                                                                                                                                                                                                                                                                                                                                                                                                                                                                                                                                                                                                                                                                                                                                                                                                                                                                                                                                                                                                                                                                                                                                                                                                                                                                                      | Inorganic pyrophosphatase [IPRO08162] (1)                                                                                                                                                                                                                                             | -                               | -                           | P_trifoliata_00181_mRNA_34.1    |
| GF0046424 | 0                            | 0                        | 1                            | Hypothetical protein (1)                                   | -                                                                                                                                                                                                                                                                                                                                                                                                                                                                                                                                                                                                                                                                                                                                                                                                                                                                                                                                                                                                                                                                                                                                                                                                                                                                                                                                                                                                                                                                                                                      | Inorganic pyrophosphatase [IPRO08162] (1)                                                                                                                                                                                                                                             | -                               | -                           | P_trifoliata_00181_mRNA_33.1    |
| GF0046423 | 0                            | 0                        | 1                            | ER lumen protein-retaining receptor (1)                    | -                                                                                                                                                                                                                                                                                                                                                                                                                                                                                                                                                                                                                                                                                                                                                                                                                                                                                                                                                                                                                                                                                                                                                                                                                                                                                                                                                                                                                                                                                                                      | ER lumen protein retaining receptor [IPRO00133] (1)                                                                                                                                                                                                                                   | -                               | -                           | P_trifoliata_00181_mRNA_19.1    |
| GF0046422 | 0                            | 0                        | 1                            | Hypothetical protein (1)                                   | -                                                                                                                                                                                                                                                                                                                                                                                                                                                                                                                                                                                                                                                                                                                                                                                                                                                                                                                                                                                                                                                                                                                                                                                                                                                                                                                                                                                                                                                                                                                      | -                                                                                                                                                                                                                                                                                     | -                               | -                           | P_trifoliata_00180_mRNA_9.1     |
| GF0046421 | 0                            | 0                        | 1                            | Hypothetical protein (1)                                   | RNA-DNA hybrid ribonuclease activity [GO:0004523]<br>molecular_function (1); nucleic acid binding [GO:0003676]<br>molecular_function (1)                                                                                                                                                                                                                                                                                                                                                                                                                                                                                                                                                                                                                                                                                                                                                                                                                                                                                                                                                                                                                                                                                                                                                                                                                                                                                                                                                                               | Ribonuclease H domain [IPRO02156] (1); Ribonuclease H-like domain [IPRO12337] (1)                                                                                                                                                                                                     | -                               | -                           | P_trifoliata_00180_mRNA_8.1     |
| GF0046420 | 0                            | 0                        | 1                            | LRR receptor-like serine/threonine-protein kinase GS01 (1) | protein binding [GO:0005515]<br>molecular_function (1)                                                                                                                                                                                                                                                                                                                                                                                                                                                                                                                                                                                                                                                                                                                                                                                                                                                                                                                                                                                                                                                                                                                                                                                                                                                                                                                                                                                                                                                                 | Reverse transcriptase domain [IPRO00477] (1); Leucine-rich repeat, typical subtype [IPRO03591] (1); Leucine-rich repeat domain, L-domain-like [IPRO23675] (1); Leucine-rich repeat-containing N-terminal, plant-type [IPRO13210] (1); Leucine-rich repeat [IPRO01611] (1)             | -                               | -                           | P_trifoliata_00180_mRNA_38.1    |
| GF0046419 | 0                            | 0                        | 1                            | Hypothetical protein (1)                                   | -                                                                                                                                                                                                                                                                                                                                                                                                                                                                                                                                                                                                                                                                                                                                                                                                                                                                                                                                                                                                                                                                                                                                                                                                                                                                                                                                                                                                                                                                                                                      | -                                                                                                                                                                                                                                                                                     | -                               | -                           | P_trifoliata_00180_mRNA_36.1    |
| GF0046418 | 0                            | 0                        | 1                            | Hypothetical protein (1)                                   | -                                                                                                                                                                                                                                                                                                                                                                                                                                                                                                                                                                                                                                                                                                                                                                                                                                                                                                                                                                                                                                                                                                                                                                                                                                                                                                                                                                                                                                                                                                                      | -                                                                                                                                                                                                                                                                                     | -                               | -                           | P_trifoliata_00180_mRNA_33.1    |
| GF0046417 | 0                            | 0                        | 1                            | Hypothetical protein (1)                                   | -                                                                                                                                                                                                                                                                                                                                                                                                                                                                                                                                                                                                                                                                                                                                                                                                                                                                                                                                                                                                                                                                                                                                                                                                                                                                                                                                                                                                                                                                                                                      | -                                                                                                                                                                                                                                                                                     | -                               | -                           | P_trifoliata_00180_mRNA_32.1    |
| GF0046416 | 0                            | 0                        | 1                            | Hypothetical protein (1)                                   | -                                                                                                                                                                                                                                                                                                                                                                                                                                                                                                                                                                                                                                                                                                                                                                                                                                                                                                                                                                                                                                                                                                                                                                                                                                                                                                                                                                                                                                                                                                                      | -                                                                                                                                                                                                                                                                                     | -                               | -                           | P_trifoliata_00180_mRNA_28.1    |
| GF0046415 | 0                            | 0                        | 1                            | Hypothetical protein (1)                                   | -                                                                                                                                                                                                                                                                                                                                                                                                                                                                                                                                                                                                                                                                                                                                                                                                                                                                                                                                                                                                                                                                                                                                                                                                                                                                                                                                                                                                                                                                                                                      | -                                                                                                                                                                                                                                                                                     | -                               | -                           | P_trifoliata_00180_mRNA_27.1    |
| GF0046414 | 0                            | 0                        | 1                            | Hypothetical protein (1)                                   | -                                                                                                                                                                                                                                                                                                                                                                                                                                                                                                                                                                                                                                                                                                                                                                                                                                                                                                                                                                                                                                                                                                                                                                                                                                                                                                                                                                                                                                                                                                                      | -                                                                                                                                                                                                                                                                                     | -                               | -                           | P_trifoliata_00180_mRNA_24.1    |
| GF0046413 | 0                            | 0                        | 1                            | Hypothetical protein (1)                                   | serpin-type endopeptidase activity [GO:0001199]<br>molecular_function (1); proteolysis [GO:0006508]<br>biological_process (1)                                                                                                                                                                                                                                                                                                                                                                                                                                                                                                                                                                                                                                                                                                                                                                                                                                                                                                                                                                                                                                                                                                                                                                                                                                                                                                                                                                                          | Peptidase S2A, retrovirus, catalytic [IPRO01995] (1); Serpin-type endopeptidase domain [IPRO21109] (1); P-type ATPase, transmembrane domain [IPRO23298] (1)                                                                                                                           | -                               | -                           | P_trifoliata_00180_mRNA_11.1    |
| GF0046412 | 0                            | 0                        | 1                            | Hypothetical protein (1)                                   | -                                                                                                                                                                                                                                                                                                                                                                                                                                                                                                                                                                                                                                                                                                                                                                                                                                                                                                                                                                                                                                                                                                                                                                                                                                                                                                                                                                                                                                                                                                                      | -                                                                                                                                                                                                                                                                                     | -                               | -                           | P_trifoliata_00179_mRNA_58.1    |
| GF0046411 | 0                            | 0                        | 1                            | Hypothetical protein (1)                                   | -                                                                                                                                                                                                                                                                                                                                                                                                                                                                                                                                                                                                                                                                                                                                                                                                                                                                                                                                                                                                                                                                                                                                                                                                                                                                                                                                                                                                                                                                                                                      | -                                                                                                                                                                                                                                                                                     | -                               | -                           | P_trifoliata_00179_mRNA_56.1    |
| GF0046410 | 0                            | 0                        | 1                            | Hypothetical protein (1)                                   | -                                                                                                                                                                                                                                                                                                                                                                                                                                                                                                                                                                                                                                                                                                                                                                                                                                                                                                                                                                                                                                                                                                                                                                                                                                                                                                                                                                                                                                                                                                                      | -                                                                                                                                                                                                                                                                                     | -                               | -                           | P_trifoliata_00179_mRNA_52.1    |
| GF0046409 | 0                            | 0                        | 1                            | Hypothetical protein (1)                                   | -                                                                                                                                                                                                                                                                                                                                                                                                                                                                                                                                                                                                                                                                                                                                                                                                                                                                                                                                                                                                                                                                                                                                                                                                                                                                                                                                                                                                                                                                                                                      | -                                                                                                                                                                                                                                                                                     | -                               | -                           | P_trifoliata_00179_mRNA_51.1    |
| GF0046408 | 0                            | 0                        | 1                            | Salutaridinase reductase (1)                               | metabolic process [GO:0008152]<br>biological_process (1); oxidoreductase activity [GO:0016491]<br>molecular_function (1)                                                                                                                                                                                                                                                                                                                                                                                                                                                                                                                                                                                                                                                                                                                                                                                                                                                                                                                                                                                                                                                                                                                                                                                                                                                                                                                                                                                               | Short-chain dehydrogenase/reductase SDR [IPRO02198] (1); Short-chain dehydrogenase/reductase, conserved site [IPRO29904] (1); Glucosylribitol dehydrogenase [IPRO02347] (1); NAD(P)-binding domain [IPRO16640] (1)                                                                    | -                               | -                           | P_trifoliata_00179_mRNA_49.1    |
| GF0046407 | 0                            | 0                        | 1                            | Hypothetical protein (1)                                   | -                                                                                                                                                                                                                                                                                                                                                                                                                                                                                                                                                                                                                                                                                                                                                                                                                                                                                                                                                                                                                                                                                                                                                                                                                                                                                                                                                                                                                                                                                                                      | -                                                                                                                                                                                                                                                                                     | -                               | -                           | P_trifoliata_00179_mRNA_47.1    |
| GF0046406 | 0                            | 0                        | 1                            | Hypothetical protein (1)                                   | -                                                                                                                                                                                                                                                                                                                                                                                                                                                                                                                                                                                                                                                                                                                                                                                                                                                                                                                                                                                                                                                                                                                                                                                                                                                                                                                                                                                                                                                                                                                      | -                                                                                                                                                                                                                                                                                     | -                               | -                           | P_trifoliata_00179_mRNA_16.1    |
| GF0046405 | 0                            | 0                        | 1                            | Hypothetical protein (1)                                   | protein ubiquitination [GO:0016567]<br>biological_process (1); ubiquitin-protein transferase activity [GO:0004842]<br>molecular_function (1)                                                                                                                                                                                                                                                                                                                                                                                                                                                                                                                                                                                                                                                                                                                                                                                                                                                                                                                                                                                                                                                                                                                                                                                                                                                                                                                                                                           | Zinc finger, RING/YVE/PHD-type [IPRO13083] (1); U box domain [IPRO03613] (1)                                                                                                                                                                                                          | -                               | -                           | P_trifoliata_00179_mRNA_10.1    |
| GF0046404 | 0                            | 0                        | 1                            | Hypothetical protein (1)                                   | -                                                                                                                                                                                                                                                                                                                                                                                                                                                                                                                                                                                                                                                                                                                                                                                                                                                                                                                                                                                                                                                                                                                                                                                                                                                                                                                                                                                                                                                                                                                      | -                                                                                                                                                                                                                                                                                     | -                               | -                           | P_trifoliata_00178_mRNA_57.1    |
| GF0046403 | 0                            | 0                        | 1                            | Hypothetical protein (1)                                   | -                                                                                                                                                                                                                                                                                                                                                                                                                                                                                                                                                                                                                                                                                                                                                                                                                                                                                                                                                                                                                                                                                                                                                                                                                                                                                                                                                                                                                                                                                                                      | -                                                                                                                                                                                                                                                                                     | -                               | -                           | P_trifoliata_00178_mRNA_56.1    |
| GF0046402 | 0                            | 0                        | 1                            | Serine/threonine-protein kinase ULK3 (1)                   | ATP binding [GO:0005524]<br>molecular_function (1); protein phosphorylation [GO:0006468]<br>biological_process (1); protein kinase activity [GO:0004672]<br>molecular_function (1)                                                                                                                                                                                                                                                                                                                                                                                                                                                                                                                                                                                                                                                                                                                                                                                                                                                                                                                                                                                                                                                                                                                                                                                                                                                                                                                                     | Protein kinase domain [IPRO00019] (1); Protein kinase-like domain [IPRO11009] (1); Serine/threonine/dual-specificity protein kinase, catalytic domain [IPRO02290] (1); Serine/threonine-protein kinase, active site [IPRO08271] (1); Protein kinase, ATP binding site [IPRO17441] (1) | -                               | -                           | P_trifoliata_00178_mRNA_53.1    |
| GF0046401 | 0                            | 0                        | 1                            | Hypothetical protein (1)                                   | -                                                                                                                                                                                                                                                                                                                                                                                                                                                                                                                                                                                                                                                                                                                                                                                                                                                                                                                                                                                                                                                                                                                                                                                                                                                                                                                                                                                                                                                                                                                      | -                                                                                                                                                                                                                                                                                     | -                               | -                           | P_trifoliata_00178_mRNA_52.1    |
| GF0046400 | 0                            | 0                        | 1                            | Hypothetical protein (1)                                   | oxidation-reduction process [GO:0055114]<br>biological_process (1); oxidoreductase activity [GO:0016491]<br>molecular_function (1)                                                                                                                                                                                                                                                                                                                                                                                                                                                                                                                                                                                                                                                                                                                                                                                                                                                                                                                                                                                                                                                                                                                                                                                                                                                                                                                                                                                     | Aldo-keto reductase [IPRO20471] (1); Aldo-keto reductase/potassium channel subunit beta [IPRO01395] (1); NADP-dependent oxidoreductase domain [IPRO23210] (1); Aldo-keto reductase, conserved site [IPRO18170] (1)                                                                    | -                               | -                           | P_trifoliata_00178_mRNA_42.1    |
| GF0046399 | 0                            | 0                        | 1                            | Hypothetical protein (1)                                   | -                                                                                                                                                                                                                                                                                                                                                                                                                                                                                                                                                                                                                                                                                                                                                                                                                                                                                                                                                                                                                                                                                                                                                                                                                                                                                                                                                                                                                                                                                                                      | -                                                                                                                                                                                                                                                                                     | -                               | -                           | P_trifoliata_00178_mRNA_38.1    |
| GF0046398 | 0                            | 0                        | 1                            | Aldo-keto reductase family 4 member C10 (1)                | oxidoreductase activity [GO:0016491]<br>molecular_function (1); oxidation-reduction process [GO:0055114]<br>biological_process (1)                                                                                                                                                                                                                                                                                                                                                                                                                                                                                                                                                                                                                                                                                                                                                                                                                                                                                                                                                                                                                                                                                                                                                                                                                                                                                                                                                                                     | Aldo-keto reductase/potassium channel subunit beta [IPRO01395] (1); Aldo-keto reductase, conserved site [IPRO18170] (1); NADP-dependent oxidoreductase domain [IPRO23210] (1)                                                                                                         | -                               | -                           | P_trifoliata_00178_mRNA_37.1    |
| GF0046397 | 0                            | 0                        | 1                            | Hypothetical protein (1)                                   | oxidation-reduction process [GO:0055114]<br>biological_process (1); oxidoreductase activity [GO:0016491]<br>molecular_function (1)                                                                                                                                                                                                                                                                                                                                                                                                                                                                                                                                                                                                                                                                                                                                                                                                                                                                                                                                                                                                                                                                                                                                                                                                                                                                                                                                                                                     | Aldo-keto reductase/potassium channel subunit beta [IPRO01395] (1); Aldo-keto reductase, conserved site [IPRO18170] (1); NADP-dependent oxidoreductase domain [IPRO23210] (1)                                                                                                         | -                               | -                           | P_trifoliata_00178_mRNA_35.1    |
| GF0046396 | 0                            | 0                        | 1                            | Hypothetical protein (1)                                   | -                                                                                                                                                                                                                                                                                                                                                                                                                                                                                                                                                                                                                                                                                                                                                                                                                                                                                                                                                                                                                                                                                                                                                                                                                                                                                                                                                                                                                                                                                                                      | -                                                                                                                                                                                                                                                                                     | -                               | -                           | P_trifoliata_00178_mRNA_26.1    |
| GF0046395 | 0                            | 0                        | 1                            | Hypothetical protein (1)                                   | -                                                                                                                                                                                                                                                                                                                                                                                                                                                                                                                                                                                                                                                                                                                                                                                                                                                                                                                                                                                                                                                                                                                                                                                                                                                                                                                                                                                                                                                                                                                      | -                                                                                                                                                                                                                                                                                     | -                               | -                           | P_trifoliata_00178_mRNA_24.1    |
| GF0046394 | 0                            | 0                        | 1                            | Hypothetical protein (1)                                   | -                                                                                                                                                                                                                                                                                                                                                                                                                                                                                                                                                                                                                                                                                                                                                                                                                                                                                                                                                                                                                                                                                                                                                                                                                                                                                                                                                                                                                                                                                                                      | -                                                                                                                                                                                                                                                                                     | -                               | -                           | P_trifoliata_00178_mRNA_23.1    |
| GF0046393 | 0                            | 0                        | 1                            | Hypothetical protein (1)                                   | -                                                                                                                                                                                                                                                                                                                                                                                                                                                                                                                                                                                                                                                                                                                                                                                                                                                                                                                                                                                                                                                                                                                                                                                                                                                                                                                                                                                                                                                                                                                      | -                                                                                                                                                                                                                                                                                     | -                               | -                           | P_trifoliata_00178_mRNA_20.1    |
| GF0046392 | 0                            | 0                        | 1                            | Hypothetical protein (1)                                   | -                                                                                                                                                                                                                                                                                                                                                                                                                                                                                                                                                                                                                                                                                                                                                                                                                                                                                                                                                                                                                                                                                                                                                                                                                                                                                                                                                                                                                                                                                                                      | -                                                                                                                                                                                                                                                                                     | -                               | -                           | P_trifoliata_00177_mRNA_9.1     |
| GF0046391 | 0                            | 0                        | 1                            | Hypothetical protein (1)                                   | -                                                                                                                                                                                                                                                                                                                                                                                                                                                                                                                                                                                                                                                                                                                                                                                                                                                                                                                                                                                                                                                                                                                                                                                                                                                                                                                                                                                                                                                                                                                      | -                                                                                                                                                                                                                                                                                     | -                               | -                           | P_trifoliata_00177_mRNA_42.1    |
| GF0046390 | 0                            | 0                        | 1                            | Hypothetical protein (1)                                   | -                                                                                                                                                                                                                                                                                                                                                                                                                                                                                                                                                                                                                                                                                                                                                                                                                                                                                                                                                                                                                                                                                                                                                                                                                                                                                                                                                                                                                                                                                                                      | -                                                                                                                                                                                                                                                                                     | -                               | -                           | P_trifoliata_00177_mRNA_40.1    |
| GF0046389 | 0                            | 0                        | 1                            | Hypothetical protein (1)                                   | -                                                                                                                                                                                                                                                                                                                                                                                                                                                                                                                                                                                                                                                                                                                                                                                                                                                                                                                                                                                                                                                                                                                                                                                                                                                                                                                                                                                                                                                                                                                      | -                                                                                                                                                                                                                                                                                     | -                               | -                           | P_trifoliata_00177_mRNA_4.1     |
| GF0046388 | 0                            | 0                        | 1                            | Hypothetical protein (1)                                   | -                                                                                                                                                                                                                                                                                                                                                                                                                                                                                                                                                                                                                                                                                                                                                                                                                                                                                                                                                                                                                                                                                                                                                                                                                                                                                                                                                                                                                                                                                                                      | Endonuclease/exonuclease/phosphatase [IPRO05135] (1)                                                                                                                                                                                                                                  | -                               | -                           | P_trifoliata_00177_mRNA_39.1    |
| GF0046387 | 0                            | 0                        | 1                            | Hypothetical protein (1)                                   | -                                                                                                                                                                                                                                                                                                                                                                                                                                                                                                                                                                                                                                                                                                                                                                                                                                                                                                                                                                                                                                                                                                                                                                                                                                                                                                                                                                                                                                                                                                                      | Zinc knuckle C2C3/C4/C5/C6 [IPRO25836] (1)                                                                                                                                                                                                                                            | -                               | -                           | P_trifoliata_00177_mRNA_33.1    |
| GF0046386 | 0                            | 0                        | 1                            | Hypothetical protein (1)                                   | -                                                                                                                                                                                                                                                                                                                                                                                                                                                                                                                                                                                                                                                                                                                                                                                                                                                                                                                                                                                                                                                                                                                                                                                                                                                                                                                                                                                                                                                                                                                      | -                                                                                                                                                                                                                                                                                     | -                               | -                           | P_trifoliata_00177_mRNA_3.1     |
| GF0046385 | 0                            | 0                        | 1                            | Hypothetical protein (1)                                   | -                                                                                                                                                                                                                                                                                                                                                                                                                                                                                                                                                                                                                                                                                                                                                                                                                                                                                                                                                                                                                                                                                                                                                                                                                                                                                                                                                                                                                                                                                                                      | Reverse transcriptase zinc-binding domain [IPRO26960] (1)                                                                                                                                                                                                                             | -                               | -                           | P_trifoliata_00177_mRNA_25.1    |
| GF0046384 | 0                            | 0                        | 1                            | Hypothetical protein (1)                                   | -                                                                                                                                                                                                                                                                                                                                                                                                                                                                                                                                                                                                                                                                                                                                                                                                                                                                                                                                                                                                                                                                                                                                                                                                                                                                                                                                                                                                                                                                                                                      | -                                                                                                                                                                                                                                                                                     | -                               | -                           | P_trifoliata_00177_mRNA_24.1    |
| GF0046383 | 0                            | 0                        | 1                            | Hypothetical protein (1)                                   | -                                                                                                                                                                                                                                                                                                                                                                                                                                                                                                                                                                                                                                                                                                                                                                                                                                                                                                                                                                                                                                                                                                                                                                                                                                                                                                                                                                                                                                                                                                                      | -                                                                                                                                                                                                                                                                                     | -                               | -                           | P_trifoliata_00177_mRNA_22.1    |
| GF0046382 | 0                            | 0                        | 1                            | Hypothetical protein (1)                                   | -                                                                                                                                                                                                                                                                                                                                                                                                                                                                                                                                                                                                                                                                                                                                                                                                                                                                                                                                                                                                                                                                                                                                                                                                                                                                                                                                                                                                                                                                                                                      | -                                                                                                                                                                                                                                                                                     | -                               | -                           | P_trifoliata_00177_mRNA_20.1    |
| GF0046381 | 0                            | 0                        | 1                            | Hypothetical protein (1)                                   | Ribonuclease H-like superfamily protein (1)                                                                                                                                                                                                                                                                                                                                                                                                                                                                                                                                                                                                                                                                                                                                                                                                                                                                                                                                                                                                                                                                                                                                                                                                                                                                                                                                                                                                                                                                            | Reverse transcriptase zinc-binding domain [IPRO26960] (1)                                                                                                                                                                                                                             | -                               | -                           | P_trifoliata_00177_mRNA_2.1     |
| GF0046380 | 0                            | 0                        | 1                            | Hypothetical protein (1)                                   | -                                                                                                                                                                                                                                                                                                                                                                                                                                                                                                                                                                                                                                                                                                                                                                                                                                                                                                                                                                                                                                                                                                                                                                                                                                                                                                                                                                                                                                                                                                                      | -                                                                                                                                                                                                                                                                                     | -                               | -                           | P_trifoliata_00177_mRNA_18.1    |
| GF0046379 | 0                            | 0                        | 1                            | Hypothetical protein (1)                                   | -                                                                                                                                                                                                                                                                                                                                                                                                                                                                                                                                                                                                                                                                                                                                                                                                                                                                                                                                                                                                                                                                                                                                                                                                                                                                                                                                                                                                                                                                                                                      | -                                                                                                                                                                                                                                                                                     | -                               | -                           | P_trifoliata_00177_mRNA_12.1    |

| ID        | Num. in <i>C. clementiae</i> | Num. in <i>C. canthii</i> | Num. in <i>P. trifoliata</i> | Note                                                                       | GO                                                                                                                                                                                                                                                                                                                                                                                                                                                                                                                                        | InterPro                                                                                                                                                                                                                                                                                                                                               | Members in <i>C. clementiae</i> | Members in <i>C. canthii</i> | Members in <i>P. trifoliata</i> |
|-----------|------------------------------|---------------------------|------------------------------|----------------------------------------------------------------------------|-------------------------------------------------------------------------------------------------------------------------------------------------------------------------------------------------------------------------------------------------------------------------------------------------------------------------------------------------------------------------------------------------------------------------------------------------------------------------------------------------------------------------------------------|--------------------------------------------------------------------------------------------------------------------------------------------------------------------------------------------------------------------------------------------------------------------------------------------------------------------------------------------------------|---------------------------------|------------------------------|---------------------------------|
| GF0046378 | 0                            | 0                         | 0                            | 1 Phospholipase A1 (1)                                                     | lipid metabolic process [GO:000629 biological_process] (1)                                                                                                                                                                                                                                                                                                                                                                                                                                                                                | Fungal lipase-like domain [IPR02921] (1); Alpha Beta hydrolase fold [IPR029058] (1)                                                                                                                                                                                                                                                                    | -                               | -                            | P_trifoliata_00176_mRNA_60.1    |
| GF0046377 | 0                            | 0                         | 0                            | 1 Hypothetical protein (1)                                                 | protein transport [GO:0015031 biological_process] (1); GTP binding [GO:0005225 molecular_function] (1); intracellular [GO:0005622 cellular_component] (1); signal transduction [GO:0007165 biological_process] (1); membrane [GO:0016020 cellular_component] (1); small GTPase mediated signal transduction [GO:0007264 biological_process] (1)                                                                                                                                                                                           | Small GTPase superfamily, Ras type [IPR02049] (1); Small GTPase superfamily, Rab type [IPR003579] (1); Small GTP-binding protein domain [IPR002225] (1); Small GTPase superfamily, Rho type [IPR003578] (1); Small GTPase superfamily [IPR001806] (1); P-loop containing nucleoside triphosphate hydrolase [IPR027417] (1)                             | -                               | -                            | P_trifoliata_00176_mRNA_55.1    |
| GF0046376 | 0                            | 0                         | 0                            | 1 Small GTPase RacB (1)                                                    | signal transduction [GO:0007165 biological_process] (1); membrane [GO:0016020 cellular_component] (1); small GTPase mediated signal transduction [GO:0007264 biological_process] (1)                                                                                                                                                                                                                                                                                                                                                      | Small GTPase superfamily, Ras type [IPR02049] (1); Small GTPase superfamily, Rab type [IPR003579] (1); Small GTP-binding protein domain [IPR002225] (1); Small GTPase superfamily, Rho type [IPR003578] (1); Small GTPase superfamily [IPR001806] (1); P-loop containing nucleoside triphosphate hydrolase [IPR027417] (1)                             | -                               | -                            | P_trifoliata_00176_mRNA_44.1    |
| GF0046375 | 0                            | 0                         | 0                            | 1 Hypothetical protein (1)                                                 |                                                                                                                                                                                                                                                                                                                                                                                                                                                                                                                                           |                                                                                                                                                                                                                                                                                                                                                        | -                               | -                            | P_trifoliata_00176_mRNA_36.1    |
| GF0046374 | 0                            | 0                         | 0                            | 1 Hypothetical protein (1)                                                 |                                                                                                                                                                                                                                                                                                                                                                                                                                                                                                                                           | Protein of unknown function DUF3769 [IPR022244] (1)                                                                                                                                                                                                                                                                                                    | -                               | -                            | P_trifoliata_00176_mRNA_32.1    |
| GF0046373 | 0                            | 0                         | 0                            | 1 Ras-related protein RABH1b (1)                                           | intracellular [GO:0005622 cellular_component] (1); intracellular protein transport [GO:0006886 biological_process] (1); GTP binding [GO:0005225 molecular_function] (1); signal transduction [GO:0007165 biological_process] (1); membrane [GO:0016020 cellular_component] (1); nucleocytoplasmic transport [GO:0006913 biological_process] (1); small GTPase mediated signal transduction [GO:0007264 biological_process] (1); protein transport [GO:0015031 biological_process] (1); GTPase activity [GO:000524 molecular_function] (1) | Ran GTPase [IPR020041] (1); Small GTPase superfamily, Rab type [IPR003579] (1); Small GTP-binding protein domain [IPR002225] (1); Small GTPase superfamily, Rho type [IPR003578] (1); Small GTPase superfamily [IPR001806] (1); P-loop containing nucleoside triphosphate hydrolase [IPR027417] (1); Small GTPase superfamily, Ras type [IPR02049] (1) | -                               | -                            | P_trifoliata_00176_mRNA_28.2    |
| GF0046372 | 0                            | 0                         | 0                            | 1 Gil1 protein (1)                                                         | oxidoreductase activity [GO:0016491 molecular_function] (1); oxidation-reduction process [GO:005514 biological_process] (1); fatty acid biosynthetic process [GO:000633 biological_process] (1); iron ion binding [GO:0005506 molecular_function] (1)                                                                                                                                                                                                                                                                                     | Fatty acid hydroxylase [IPR006694] (1); Uncharacterised domain Wax2, C-terminal [IPR021940] (1)                                                                                                                                                                                                                                                        | -                               | -                            | P_trifoliata_00176_mRNA_21.1    |
| GF0046371 | 0                            | 0                         | 0                            | 1 Hypothetical protein (1)                                                 |                                                                                                                                                                                                                                                                                                                                                                                                                                                                                                                                           |                                                                                                                                                                                                                                                                                                                                                        | -                               | -                            | P_trifoliata_00176_mRNA_18.1    |
| GF0046370 | 0                            | 0                         | 0                            | 1 ABC transporter C family protein, putative (1)                           |                                                                                                                                                                                                                                                                                                                                                                                                                                                                                                                                           |                                                                                                                                                                                                                                                                                                                                                        | -                               | -                            | P_trifoliata_00176_mRNA_17.1    |
| GF0046369 | 0                            | 0                         | 0                            | 1 Hypothetical protein (1)                                                 |                                                                                                                                                                                                                                                                                                                                                                                                                                                                                                                                           |                                                                                                                                                                                                                                                                                                                                                        | -                               | -                            | P_trifoliata_00175_mRNA_68.1    |
| GF0046368 | 0                            | 0                         | 0                            | 1 Hypothetical protein (1)                                                 |                                                                                                                                                                                                                                                                                                                                                                                                                                                                                                                                           |                                                                                                                                                                                                                                                                                                                                                        | -                               | -                            | P_trifoliata_00175_mRNA_60.1    |
| GF0046367 | 0                            | 0                         | 0                            | 1 Putative hexose transporter (1)                                          | transmembrane transport [GO:005085 biological_process] (1); transmembrane transporter activity [GO:0022857 molecular_function] (1); membrane [GO:0016020 cellular_component] (1); integral component of membrane [GO:0016021 cellular_component] (1); substrate-specific transmembrane transporter activity [GO:0022891 molecular_function] (1)                                                                                                                                                                                           | Major facilitator superfamily domain [IPR020846] (1); Major facilitator, sugar transporter-like [IPR005828] (1); Sugar/inositol transporter [IPR003663] (1)                                                                                                                                                                                            | -                               | -                            | P_trifoliata_00175_mRNA_4.1     |
| GF0046366 | 0                            | 0                         | 0                            | 1 Hypothetical protein (1)                                                 | transferase activity, transferring alkyl or seryl (other than methyl) groups [GO:0016765 molecular_function] (1)                                                                                                                                                                                                                                                                                                                                                                                                                          | Decaprenyl diphosphate synthase-like [IPR001441] (1)                                                                                                                                                                                                                                                                                                   | -                               | -                            | P_trifoliata_00175_mRNA_30.1    |
| GF0046365 | 0                            | 0                         | 0                            | 1 Flavoprotein wrbA (1)                                                    | oxidoreductase activity [GO:0016491 molecular_function] (1); FMN binding [GO:0010181 molecular_function] (1); negative regulation of transcription, DNA-templated [GO:0045892 biological_process] (1)                                                                                                                                                                                                                                                                                                                                     | NADPH-dependent FMN reductase-like [IPR005025] (1); Flavodoxin/nitric oxide synthase [IPR002854] (1); Flavoprotein-like domain [IPR020939] (1); Flavoprotein WrbA [IPR010089] (1)                                                                                                                                                                      | -                               | -                            | P_trifoliata_00175_mRNA_21.1    |
| GF0046364 | 0                            | 0                         | 0                            | 1 GDP-mannose transporter GONST1 (1)                                       | oxidoreductase activity, acting on paired donors, with incorporation or reduction of molecular oxygen [GO:0016705 molecular_function] (1); oxidation-reduction process [GO:005514 biological_process] (1); heme binding [GO:0020037 molecular_function] (1); iron ion binding [GO:0005506 molecular_function] (1)                                                                                                                                                                                                                         | Sugar phosphate transporter domain [IPR004853] (1)                                                                                                                                                                                                                                                                                                     | -                               | -                            | P_trifoliata_00175_mRNA_18.1    |
| GF0046363 | 0                            | 0                         | 0                            | 1 Hypothetical protein (1)                                                 |                                                                                                                                                                                                                                                                                                                                                                                                                                                                                                                                           | Cytochrome P450, conserved site [IPR017972] (1); Cytochrome P450 [IPR001128] (1)                                                                                                                                                                                                                                                                       | -                               | -                            | P_trifoliata_00175_mRNA_15.1    |
| GF0046362 | 0                            | 0                         | 0                            | 1 Hypothetical protein (1)                                                 |                                                                                                                                                                                                                                                                                                                                                                                                                                                                                                                                           |                                                                                                                                                                                                                                                                                                                                                        | -                               | -                            | P_trifoliata_00174_mRNA_65.1    |
| GF0046361 | 0                            | 0                         | 0                            | 1 RNA-directed DNA polymerase, related (1)                                 |                                                                                                                                                                                                                                                                                                                                                                                                                                                                                                                                           |                                                                                                                                                                                                                                                                                                                                                        | -                               | -                            | P_trifoliata_00174_mRNA_64.1    |
| GF0046360 | 0                            | 0                         | 0                            | 1 Hypothetical protein (1)                                                 |                                                                                                                                                                                                                                                                                                                                                                                                                                                                                                                                           |                                                                                                                                                                                                                                                                                                                                                        | -                               | -                            | P_trifoliata_00174_mRNA_63.1    |
| GF0046359 | 0                            | 0                         | 0                            | 1 Hypothetical protein (1)                                                 |                                                                                                                                                                                                                                                                                                                                                                                                                                                                                                                                           |                                                                                                                                                                                                                                                                                                                                                        | -                               | -                            | P_trifoliata_00174_mRNA_62.1    |
| GF0046358 | 0                            | 0                         | 0                            | 1 Hypothetical protein (1)                                                 |                                                                                                                                                                                                                                                                                                                                                                                                                                                                                                                                           |                                                                                                                                                                                                                                                                                                                                                        | -                               | -                            | P_trifoliata_00174_mRNA_58.1    |
| GF0046357 | 0                            | 0                         | 0                            | 1 Hypothetical protein (1)                                                 |                                                                                                                                                                                                                                                                                                                                                                                                                                                                                                                                           |                                                                                                                                                                                                                                                                                                                                                        | -                               | -                            | P_trifoliata_00174_mRNA_53.1    |
| GF0046356 | 0                            | 0                         | 0                            | 1 Hypothetical protein (1)                                                 |                                                                                                                                                                                                                                                                                                                                                                                                                                                                                                                                           | Winged helix-turn-helix DNA-binding domain [IPR011991] (1)                                                                                                                                                                                                                                                                                             | -                               | -                            | P_trifoliata_00174_mRNA_52.1    |
| GF0046355 | 0                            | 0                         | 0                            | 1 Hypothetical protein (1)                                                 |                                                                                                                                                                                                                                                                                                                                                                                                                                                                                                                                           |                                                                                                                                                                                                                                                                                                                                                        | -                               | -                            | P_trifoliata_00174_mRNA_50.1    |
| GF0046354 | 0                            | 0                         | 0                            | 1 Hypothetical protein (1)                                                 |                                                                                                                                                                                                                                                                                                                                                                                                                                                                                                                                           | Viral movement protein [IPR028919] (1)                                                                                                                                                                                                                                                                                                                 | -                               | -                            | P_trifoliata_00174_mRNA_45.1    |
| GF0046353 | 0                            | 0                         | 0                            | 1 Hypothetical protein (1)                                                 |                                                                                                                                                                                                                                                                                                                                                                                                                                                                                                                                           |                                                                                                                                                                                                                                                                                                                                                        | -                               | -                            | P_trifoliata_00174_mRNA_44.1    |
| GF0046352 | 0                            | 0                         | 0                            | 1 Hypothetical protein (1)                                                 |                                                                                                                                                                                                                                                                                                                                                                                                                                                                                                                                           |                                                                                                                                                                                                                                                                                                                                                        | -                               | -                            | P_trifoliata_00174_mRNA_42.1    |
| GF0046351 | 0                            | 0                         | 0                            | 1 Hypothetical protein (1)                                                 |                                                                                                                                                                                                                                                                                                                                                                                                                                                                                                                                           |                                                                                                                                                                                                                                                                                                                                                        | -                               | -                            | P_trifoliata_00174_mRNA_40.1    |
| GF0046350 | 0                            | 0                         | 0                            | 1 Hypothetical protein (1)                                                 |                                                                                                                                                                                                                                                                                                                                                                                                                                                                                                                                           |                                                                                                                                                                                                                                                                                                                                                        | -                               | -                            | P_trifoliata_00174_mRNA_4.1     |
| GF0046349 | 0                            | 0                         | 0                            | 1 Hypothetical protein (1)                                                 |                                                                                                                                                                                                                                                                                                                                                                                                                                                                                                                                           |                                                                                                                                                                                                                                                                                                                                                        | -                               | -                            | P_trifoliata_00174_mRNA_39.1    |
| GF0046348 | 0                            | 0                         | 0                            | 1 Polynucleotidyl transferase, ribonuclease H-like superfamily protein (1) | nucleic acid binding [GO:0003676 molecular_function] (1)                                                                                                                                                                                                                                                                                                                                                                                                                                                                                  | Ribonuclease H-like domain [IPR012337] (1)                                                                                                                                                                                                                                                                                                             | -                               | -                            | P_trifoliata_00174_mRNA_37.1    |
| GF0046347 | 0                            | 0                         | 0                            | 1 Hypothetical protein (1)                                                 |                                                                                                                                                                                                                                                                                                                                                                                                                                                                                                                                           |                                                                                                                                                                                                                                                                                                                                                        | -                               | -                            | P_trifoliata_00174_mRNA_36.1    |
| GF0046346 | 0                            | 0                         | 0                            | 1 Myb-related protein 308 (1)                                              | DNA binding [GO:0003677 molecular_function] (1)                                                                                                                                                                                                                                                                                                                                                                                                                                                                                           | Homocdomain-like [IPR009057] (1)                                                                                                                                                                                                                                                                                                                       | -                               | -                            | P_trifoliata_00174_mRNA_27.1    |
| GF0046345 | 0                            | 0                         | 0                            | 1 Hypothetical protein (1)                                                 |                                                                                                                                                                                                                                                                                                                                                                                                                                                                                                                                           |                                                                                                                                                                                                                                                                                                                                                        | -                               | -                            | P_trifoliata_00174_mRNA_23.1    |
| GF0046344 | 0                            | 0                         | 0                            | 1 Hypothetical protein (1)                                                 | phosphorelay signal transduction system [GO:0000160 biological_process] (1)                                                                                                                                                                                                                                                                                                                                                                                                                                                               | Signal transduction response regulator, receiver domain [IPR001789] (1); CheY-like superfamily [IPR010061] (1)                                                                                                                                                                                                                                         | -                               | -                            | P_trifoliata_00174_mRNA_22.1    |
| GF0046343 | 0                            | 0                         | 0                            | 1 Hypothetical protein (1)                                                 |                                                                                                                                                                                                                                                                                                                                                                                                                                                                                                                                           |                                                                                                                                                                                                                                                                                                                                                        | -                               | -                            | P_trifoliata_00174_mRNA_20.1    |
| GF0046342 | 0                            | 0                         | 0                            | 1 Senescence-associated protein DIN1 (1)                                   |                                                                                                                                                                                                                                                                                                                                                                                                                                                                                                                                           | Rhodanese-like domain [IPR001763] (1); Lysine methyltransferase [IPR019410] (1); S-adenosyl-L-methionine-dependent methyltransferase [IPR020663] (1)                                                                                                                                                                                                   | -                               | -                            | P_trifoliata_00174_mRNA_15.1    |
| GF0046341 | 0                            | 0                         | 0                            | 1 methyltransferases superfamily protein (1)                               |                                                                                                                                                                                                                                                                                                                                                                                                                                                                                                                                           |                                                                                                                                                                                                                                                                                                                                                        | -                               | -                            | P_trifoliata_00174_mRNA_10.1    |
| GF0046340 | 0                            | 0                         | 0                            | 1 Hypothetical protein (1)                                                 |                                                                                                                                                                                                                                                                                                                                                                                                                                                                                                                                           |                                                                                                                                                                                                                                                                                                                                                        | -                               | -                            | P_trifoliata_00173_mRNA_40.1    |
| GF0046339 | 0                            | 0                         | 0                            | 1 Hypothetical protein (1)                                                 |                                                                                                                                                                                                                                                                                                                                                                                                                                                                                                                                           |                                                                                                                                                                                                                                                                                                                                                        | -                               | -                            | P_trifoliata_00173_mRNA_37.1    |
| GF0046338 | 0                            | 0                         | 0                            | 1 Hypothetical protein (1)                                                 |                                                                                                                                                                                                                                                                                                                                                                                                                                                                                                                                           |                                                                                                                                                                                                                                                                                                                                                        | -                               | -                            | P_trifoliata_00173_mRNA_30.1    |
| GF0046337 | 0                            | 0                         | 0                            | 1 Hypothetical protein (1)                                                 |                                                                                                                                                                                                                                                                                                                                                                                                                                                                                                                                           |                                                                                                                                                                                                                                                                                                                                                        | -                               | -                            | P_trifoliata_00173_mRNA_3.1     |
| GF0046336 | 0                            | 0                         | 0                            | 1 Hypothetical protein (1)                                                 | nucleic acid binding [GO:0003676 molecular_function] (1); RNA-DNA hybrid ribonuclease activity [GO:0004523 molecular_function] (1)                                                                                                                                                                                                                                                                                                                                                                                                        | Ribonuclease H domain [IPR002156] (1); Ribonuclease H-like domain [IPR012337] (1)                                                                                                                                                                                                                                                                      | -                               | -                            | P_trifoliata_00173_mRNA_29.1    |
| GF0046335 | 0                            | 0                         | 0                            | 1 Hypothetical protein (1)                                                 |                                                                                                                                                                                                                                                                                                                                                                                                                                                                                                                                           |                                                                                                                                                                                                                                                                                                                                                        | -                               | -                            | P_trifoliata_00173_mRNA_28.1    |
| GF0046334 | 0                            | 0                         | 0                            | 1 Hypothetical protein (1)                                                 |                                                                                                                                                                                                                                                                                                                                                                                                                                                                                                                                           |                                                                                                                                                                                                                                                                                                                                                        | -                               | -                            | P_trifoliata_00172_mRNA_8.1     |
| GF0046333 | 0                            | 0                         | 0                            | 1 Hypothetical protein (1)                                                 |                                                                                                                                                                                                                                                                                                                                                                                                                                                                                                                                           |                                                                                                                                                                                                                                                                                                                                                        | -                               | -                            | P_trifoliata_00172_mRNA_64.1    |
| GF0046332 | 0                            | 0                         | 0                            | 1 Hypothetical protein (1)                                                 |                                                                                                                                                                                                                                                                                                                                                                                                                                                                                                                                           |                                                                                                                                                                                                                                                                                                                                                        | -                               | -                            | P_trifoliata_00172_mRNA_56.1    |
| GF0046331 | 0                            | 0                         | 0                            | 1 Hypothetical protein (1)                                                 |                                                                                                                                                                                                                                                                                                                                                                                                                                                                                                                                           | GroEL-like equatorial domain [IPR027413] (1)                                                                                                                                                                                                                                                                                                           | -                               | -                            | P_trifoliata_00172_mRNA_2.1     |
| GF0046330 | 0                            | 0                         | 0                            | 1 Hypothetical protein (1)                                                 |                                                                                                                                                                                                                                                                                                                                                                                                                                                                                                                                           |                                                                                                                                                                                                                                                                                                                                                        | -                               | -                            | P_trifoliata_00172_mRNA_18.1    |
| GF0046329 | 0                            | 0                         | 0                            | 1 Hypothetical protein (1)                                                 |                                                                                                                                                                                                                                                                                                                                                                                                                                                                                                                                           |                                                                                                                                                                                                                                                                                                                                                        | -                               | -                            | P_trifoliata_00172_mRNA_10.1    |
| GF0046328 | 0                            | 0                         | 0                            | 1 Hypothetical protein (1)                                                 |                                                                                                                                                                                                                                                                                                                                                                                                                                                                                                                                           | Viral movement protein [IPR028919] (1)                                                                                                                                                                                                                                                                                                                 | -                               | -                            | P_trifoliata_00171_mRNA_7.1     |
| GF0046327 | 0                            | 0                         | 0                            | 1 Hypothetical protein (1)                                                 |                                                                                                                                                                                                                                                                                                                                                                                                                                                                                                                                           |                                                                                                                                                                                                                                                                                                                                                        | -                               | -                            | P_trifoliata_00171_mRNA_52.1    |
| GF0046326 | 0                            | 0                         | 0                            | 1 Hypothetical protein (1)                                                 |                                                                                                                                                                                                                                                                                                                                                                                                                                                                                                                                           |                                                                                                                                                                                                                                                                                                                                                        | -                               | -                            | P_trifoliata_00171_mRNA_50.1    |
| GF0046325 | 0                            | 0                         | 0                            | 1 Hypothetical protein (1)                                                 |                                                                                                                                                                                                                                                                                                                                                                                                                                                                                                                                           |                                                                                                                                                                                                                                                                                                                                                        | -                               | -                            | P_trifoliata_00171_mRNA_49.1    |
| GF0046324 | 0                            | 0                         | 0                            | 1 Hypothetical protein (1)                                                 |                                                                                                                                                                                                                                                                                                                                                                                                                                                                                                                                           |                                                                                                                                                                                                                                                                                                                                                        | -                               | -                            | P_trifoliata_00171_mRNA_48.1    |
| GF0046323 | 0                            | 0                         | 0                            | 1 Hypothetical protein (1)                                                 | protein kinase activity [GO:0004672 molecular_function] (1); protein phosphorylation [GO:0006468 biological_process] (1); ATP binding [GO:0005524 molecular_function] (1)                                                                                                                                                                                                                                                                                                                                                                 | Protein kinase, ATP binding site [IPR017441] (1); Serine/threonine/tyrosine-protein kinase catalytic domain [IPR001245] (1); Protein kinase domain [IPR00719] (1); Protein kinase-like domain [IPR011009] (1); Concavalin A-like lectin/glucanase domain [IPR013320] (1); EGF-like, conserved site [IPR013032] (1)                                     | -                               | -                            | P_trifoliata_00171_mRNA_38.1    |
| GF0046322 | 0                            | 0                         | 0                            | 1 Glycerol kinase (1)                                                      | carbohydrate metabolic process [GO:0005975 biological_process] (1); protein phosphotransferase activity, alcohol group as acceptor [GO:0016773 molecular_function] (1)                                                                                                                                                                                                                                                                                                                                                                    | Carbohydrate kinase, FGXY, C-terminal [IPR018485] (1); Carbohydrate kinase, FGXY, N-terminal [IPR018484] (1)                                                                                                                                                                                                                                           | -                               | -                            | P_trifoliata_00171_mRNA_37.1    |
| GF0046321 | 0                            | 0                         | 0                            | 1 Hypothetical protein (1)                                                 | carbohydrate metabolic process [GO:0005975 biological_process] (1); phosphotransferase activity, alcohol group as acceptor [GO:0016773 molecular_function] (1)                                                                                                                                                                                                                                                                                                                                                                            | Carbohydrate kinase, FGXY, C-terminal [IPR018485] (1)                                                                                                                                                                                                                                                                                                  | -                               | -                            | P_trifoliata_00171_mRNA_35.1    |
| GF0046320 | 0                            | 0                         | 0                            | 1 Hypothetical protein (1)                                                 |                                                                                                                                                                                                                                                                                                                                                                                                                                                                                                                                           |                                                                                                                                                                                                                                                                                                                                                        | -                               | -                            | P_trifoliata_00171_mRNA_32.1    |

| ID        | Num. in <i>C. clementiae</i> | Num. in <i>C. canihii</i> | Num. in <i>P. trifoliata</i> | Note                                                      | GO                                                                                                                                                                                                                                                                                                                                                        | InterPro                                                                                                                                                                                                                                                                                                 | Members in <i>C. clementiae</i> | Members in <i>C. canihii</i> | Members in <i>P. trifoliata</i> |
|-----------|------------------------------|---------------------------|------------------------------|-----------------------------------------------------------|-----------------------------------------------------------------------------------------------------------------------------------------------------------------------------------------------------------------------------------------------------------------------------------------------------------------------------------------------------------|----------------------------------------------------------------------------------------------------------------------------------------------------------------------------------------------------------------------------------------------------------------------------------------------------------|---------------------------------|------------------------------|---------------------------------|
| GF0046319 | 0                            | 0                         | 0                            | 1 Hypothetical protein (1)                                |                                                                                                                                                                                                                                                                                                                                                           |                                                                                                                                                                                                                                                                                                          | -                               | -                            | P_trifoliata_00171_mRNA_25.1    |
| GF0046318 | 0                            | 0                         | 0                            | 1 Hypothetical protein (1)                                |                                                                                                                                                                                                                                                                                                                                                           |                                                                                                                                                                                                                                                                                                          | -                               | -                            | P_trifoliata_00171_mRNA_23.1    |
| GF0046317 | 0                            | 0                         | 0                            | 1 Hypothetical protein (1)                                |                                                                                                                                                                                                                                                                                                                                                           |                                                                                                                                                                                                                                                                                                          | -                               | -                            | P_trifoliata_00171_mRNA_17.1    |
| GF0046316 | 0                            | 0                         | 0                            | 1 Hypothetical protein (1)                                |                                                                                                                                                                                                                                                                                                                                                           |                                                                                                                                                                                                                                                                                                          | -                               | -                            | P_trifoliata_00171_mRNA_16.1    |
| GF0046315 | 0                            | 0                         | 0                            | 1 Hypothetical protein (1)                                |                                                                                                                                                                                                                                                                                                                                                           |                                                                                                                                                                                                                                                                                                          | -                               | -                            | P_trifoliata_00171_mRNA_15.1    |
| GF0046314 | 0                            | 0                         | 0                            | 1 LRR receptor-like kinase (1)                            | protein binding [GO:0005515]; molecular_function (1)                                                                                                                                                                                                                                                                                                      | Leucine-rich repeat-containing N-terminal, plant-type [IPR013210] (1); Leucine-rich repeat [IPR001611] (1); Leucine-rich repeat domain, L domain-like [IPR032675] (1)                                                                                                                                    | -                               | -                            | P_trifoliata_00171_mRNA_14.1    |
| GF0046313 | 0                            | 0                         | 0                            | 1 Hypothetical protein (1)                                |                                                                                                                                                                                                                                                                                                                                                           |                                                                                                                                                                                                                                                                                                          | -                               | -                            | P_trifoliata_00171_mRNA_13.1    |
| GF0046312 | 0                            | 0                         | 0                            | 1 Hypothetical protein (1)                                |                                                                                                                                                                                                                                                                                                                                                           |                                                                                                                                                                                                                                                                                                          | -                               | -                            | P_trifoliata_00171_mRNA_12.1    |
| GF0046311 | 0                            | 0                         | 0                            | 1 Hypothetical protein (1)                                |                                                                                                                                                                                                                                                                                                                                                           |                                                                                                                                                                                                                                                                                                          | -                               | -                            | P_trifoliata_00170_mRNA_9.1     |
| GF0046310 | 0                            | 0                         | 0                            | 1 Hypothetical protein (1)                                |                                                                                                                                                                                                                                                                                                                                                           |                                                                                                                                                                                                                                                                                                          | -                               | -                            | P_trifoliata_00170_mRNA_6.2     |
| GF0046309 | 0                            | 0                         | 0                            | 1 Hypothetical protein (1)                                |                                                                                                                                                                                                                                                                                                                                                           |                                                                                                                                                                                                                                                                                                          | -                               | -                            | P_trifoliata_00170_mRNA_5.9     |
| GF0046308 | 0                            | 0                         | 0                            | 1 Hypothetical protein (1)                                |                                                                                                                                                                                                                                                                                                                                                           |                                                                                                                                                                                                                                                                                                          | -                               | -                            | P_trifoliata_00170_mRNA_5.8     |
| GF0046307 | 0                            | 0                         | 0                            | 1 Hypothetical protein (1)                                |                                                                                                                                                                                                                                                                                                                                                           |                                                                                                                                                                                                                                                                                                          | -                               | -                            | P_trifoliata_00170_mRNA_5.7     |
| GF0046306 | 0                            | 0                         | 0                            | 1 Hypothetical protein (1)                                |                                                                                                                                                                                                                                                                                                                                                           |                                                                                                                                                                                                                                                                                                          | -                               | -                            | P_trifoliata_00170_mRNA_5.6     |
| GF0046305 | 0                            | 0                         | 0                            | 1 Hypothetical protein (1)                                |                                                                                                                                                                                                                                                                                                                                                           |                                                                                                                                                                                                                                                                                                          | -                               | -                            | P_trifoliata_00170_mRNA_5.5     |
| GF0046304 | 0                            | 0                         | 0                            | 1 Hypothetical protein (1)                                |                                                                                                                                                                                                                                                                                                                                                           |                                                                                                                                                                                                                                                                                                          | -                               | -                            | P_trifoliata_00170_mRNA_5.4     |
| GF0046303 | 0                            | 0                         | 0                            | 1 Hypothetical protein (1)                                | proteolysis [GO:0006508]; biological_process (1); aspartic-type endopeptidase activity [GO:0004190]; molecular_function (1)                                                                                                                                                                                                                               | Peptidase A2A, retrovirus, catalytic [IPR001995] (1)                                                                                                                                                                                                                                                     | -                               | -                            | P_trifoliata_00170_mRNA_5.2     |
| GF0046302 | 0                            | 0                         | 0                            | 1 Hypothetical protein (1)                                |                                                                                                                                                                                                                                                                                                                                                           |                                                                                                                                                                                                                                                                                                          | -                               | -                            | P_trifoliata_00170_mRNA_4.8     |
| GF0046301 | 0                            | 0                         | 0                            | 1 Hypothetical protein (1)                                |                                                                                                                                                                                                                                                                                                                                                           |                                                                                                                                                                                                                                                                                                          | -                               | -                            | P_trifoliata_00170_mRNA_4.4     |
| GF0046300 | 0                            | 0                         | 0                            | 1 Hypothetical protein (1)                                |                                                                                                                                                                                                                                                                                                                                                           |                                                                                                                                                                                                                                                                                                          | -                               | -                            | P_trifoliata_00170_mRNA_4.3     |
| GF0046299 | 0                            | 0                         | 0                            | 1 Hypothetical protein (1)                                |                                                                                                                                                                                                                                                                                                                                                           |                                                                                                                                                                                                                                                                                                          | -                               | -                            | P_trifoliata_00170_mRNA_4.1     |
| GF0046298 | 0                            | 0                         | 0                            | 1 Hypothetical protein (1)                                |                                                                                                                                                                                                                                                                                                                                                           |                                                                                                                                                                                                                                                                                                          | -                               | -                            | P_trifoliata_00170_mRNA_4.0     |
| GF0046297 | 0                            | 0                         | 0                            | 1 Photosystem II CP47 chlorophyll apoprotein (1)          | photosynthetic electron transport chain [GO:0009767]; biological_process (1); membrane [GO:0016020]; cellular_component (1); photosynthesis; light reaction [GO:0019684]; biological_process (1); photosystem [GO:0009521]; cellular_component (1); chlorophyll binding [GO:0016168]; molecular_function (1)                                              | Photosystem antenna protein-like [IPR00932] (1)                                                                                                                                                                                                                                                          | -                               | -                            | P_trifoliata_00170_mRNA_3.8     |
| GF0046296 | 0                            | 0                         | 0                            | 1 Hypothetical protein (1)                                |                                                                                                                                                                                                                                                                                                                                                           |                                                                                                                                                                                                                                                                                                          | -                               | -                            | P_trifoliata_00170_mRNA_35.1    |
| GF0046295 | 0                            | 0                         | 0                            | 1 Hypothetical protein (1)                                |                                                                                                                                                                                                                                                                                                                                                           |                                                                                                                                                                                                                                                                                                          | -                               | -                            | P_trifoliata_00170_mRNA_33.1    |
| GF0046294 | 0                            | 0                         | 0                            | 1 Hypothetical protein (1)                                |                                                                                                                                                                                                                                                                                                                                                           |                                                                                                                                                                                                                                                                                                          | -                               | -                            | P_trifoliata_00170_mRNA_32.1    |
| GF0046293 | 0                            | 0                         | 0                            | 1 Hypothetical protein (1)                                |                                                                                                                                                                                                                                                                                                                                                           |                                                                                                                                                                                                                                                                                                          | -                               | -                            | P_trifoliata_00170_mRNA_31.1    |
| GF0046292 | 0                            | 0                         | 0                            | 1 Cornicin family protein (1)                             | intracellular signal transduction [GO:003556]; biological_process (1); membrane [GO:0016020]; cellular_component (1)                                                                                                                                                                                                                                      | Cornicin [IPR003377] (1)                                                                                                                                                                                                                                                                                 | -                               | -                            | P_trifoliata_00170_mRNA_28.1    |
| GF0046291 | 0                            | 0                         | 0                            | 1 PGLRLA transmembrane protein (1)                        | nucleic acid binding [GO:0003676]; molecular_function (1); intracellular [GO:0005622]; cellular_component (1)                                                                                                                                                                                                                                             | HRDC domain [IPR002121] (1)                                                                                                                                                                                                                                                                              | -                               | -                            | P_trifoliata_00169_mRNA_44.1    |
| GF0046290 | 0                            | 0                         | 0                            | 1 Hypothetical protein (1)                                |                                                                                                                                                                                                                                                                                                                                                           |                                                                                                                                                                                                                                                                                                          | -                               | -                            | P_trifoliata_00169_mRNA_37.1    |
| GF0046289 | 0                            | 0                         | 0                            | 1 Putative MYB DNA-binding domain superfamily protein (1) | DNA binding [GO:0003677]; molecular_function (1)                                                                                                                                                                                                                                                                                                          | Pentatricopeptide repeat [IPR002885] (1); SANT/Myb domain [IPR01005] (1); Homeodomain-like [IPR009057] (1); Myb domain [IPR017930] (1)                                                                                                                                                                   | -                               | -                            | P_trifoliata_00169_mRNA_27.1    |
| GF0046288 | 0                            | 0                         | 0                            | 1 Ulp1 peptidase-like (1)                                 | cysteine-type peptidase activity [GO:0008234]; molecular_function (1); proteolysis [GO:0006508]; biological_process (1)                                                                                                                                                                                                                                   | Ulp1 protease family, C-terminal catalytic domain [IPR003653] (1)                                                                                                                                                                                                                                        | -                               | -                            | P_trifoliata_00169_mRNA_25.1    |
| GF0046286 | 0                            | 0                         | 0                            | 1 Hypothetical protein (1)                                |                                                                                                                                                                                                                                                                                                                                                           |                                                                                                                                                                                                                                                                                                          | -                               | -                            | P_trifoliata_00169_mRNA_22.1    |
| GF0046285 | 0                            | 0                         | 0                            | 1 Hypothetical protein (1)                                |                                                                                                                                                                                                                                                                                                                                                           |                                                                                                                                                                                                                                                                                                          | -                               | -                            | P_trifoliata_00169_mRNA_2.1     |
| GF0046284 | 0                            | 0                         | 0                            | 1 Hypothetical protein (1)                                | protein binding [GO:0005515]; molecular_function (1)                                                                                                                                                                                                                                                                                                      | MATH TRAF domain [IPR002083] (1); TRAF-like [IPR008974] (1)                                                                                                                                                                                                                                              | -                               | -                            | P_trifoliata_00169_mRNA_18.1    |
| GF0046283 | 0                            | 0                         | 0                            | 1 Hypothetical protein (1)                                |                                                                                                                                                                                                                                                                                                                                                           |                                                                                                                                                                                                                                                                                                          | -                               | -                            | P_trifoliata_00169_mRNA_15.1    |
| GF0046282 | 0                            | 0                         | 0                            | 1 Ubiquitin carboxyl-terminal hydrolase 12 (1)            | protein binding [GO:0005515]; molecular_function (1)                                                                                                                                                                                                                                                                                                      | TRAF-like [IPR008974] (1); MATH TRAF domain [IPR002083] (1)                                                                                                                                                                                                                                              | -                               | -                            | P_trifoliata_00169_mRNA_13.1    |
| GF0046281 | 0                            | 0                         | 0                            | 1 Envelope glycoprotein (1)                               |                                                                                                                                                                                                                                                                                                                                                           |                                                                                                                                                                                                                                                                                                          | -                               | -                            | P_trifoliata_00169_mRNA_12.1    |
| GF0046280 | 0                            | 0                         | 0                            | 1 Ubiquitin carboxyl-terminal hydrolase 13 (1)            | protein binding [GO:0005515]; molecular_function (1)                                                                                                                                                                                                                                                                                                      | MATH TRAF domain [IPR002083] (1); TRAF-like [IPR008974] (1)                                                                                                                                                                                                                                              | -                               | -                            | P_trifoliata_00169_mRNA_11.1    |
| GF0046279 | 0                            | 0                         | 0                            | 1 Hypothetical protein (1)                                |                                                                                                                                                                                                                                                                                                                                                           |                                                                                                                                                                                                                                                                                                          | -                               | -                            | P_trifoliata_00169_mRNA_1.1     |
| GF0046278 | 0                            | 0                         | 0                            | 1 Hypothetical protein (1)                                | RNA binding [GO:0003723]; molecular_function (1)                                                                                                                                                                                                                                                                                                          | RNA-binding, CRM domain [IPR001890] (1)                                                                                                                                                                                                                                                                  | -                               | -                            | P_trifoliata_00168_mRNA_7.1     |
| GF0046277 | 0                            | 0                         | 0                            | 1 Hypothetical protein (1)                                |                                                                                                                                                                                                                                                                                                                                                           |                                                                                                                                                                                                                                                                                                          | -                               | -                            | P_trifoliata_00168_mRNA_5.1     |
| GF0046276 | 0                            | 0                         | 0                            | 1 Hypothetical protein (1)                                |                                                                                                                                                                                                                                                                                                                                                           |                                                                                                                                                                                                                                                                                                          | -                               | -                            | P_trifoliata_00168_mRNA_4.9     |
| GF0046275 | 0                            | 0                         | 0                            | 1 Hypothetical protein (1)                                |                                                                                                                                                                                                                                                                                                                                                           |                                                                                                                                                                                                                                                                                                          | -                               | -                            | P_trifoliata_00168_mRNA_4.7     |
| GF0046274 | 0                            | 0                         | 0                            | 1 Hypothetical protein (1)                                |                                                                                                                                                                                                                                                                                                                                                           |                                                                                                                                                                                                                                                                                                          | -                               | -                            | P_trifoliata_00168_mRNA_4.1     |
| GF0046273 | 0                            | 0                         | 0                            | 1 Aspartic proteinase-like protein 1 (1)                  | proteolysis [GO:0006508]; biological_process (1); aspartic-type endopeptidase activity [GO:0004190]; molecular_function (1)                                                                                                                                                                                                                               | Gag-polypeptide of LTR copia-type [IPR029472] (1); Aspartic peptidase, active site [IPR001969] (1); Aspartic peptidase A1 family [IPR001461] (1); Aspartic peptidase domain [IPR021109] (1)                                                                                                              | -                               | -                            | P_trifoliata_00168_mRNA_3.2     |
| GF0046272 | 0                            | 0                         | 0                            | 1 Hypothetical protein (1)                                |                                                                                                                                                                                                                                                                                                                                                           |                                                                                                                                                                                                                                                                                                          | -                               | -                            | P_trifoliata_00168_mRNA_2.9     |
| GF0046271 | 0                            | 0                         | 0                            | 1 Hypothetical protein (1)                                | zinc ion binding [GO:0008270]; molecular_function (1); nucleic acid binding [GO:0003676]; molecular_function (1)                                                                                                                                                                                                                                          | Zinc finger, CCHC-type [IPR01878] (1); Zinc knuckle CXC4HX4C [IPR025836] (1); Reverse transcriptase zinc-binding domain [IPR02960] (1); Ribonuclease H-like domain [IPR012337] (1); Domain of unknown function DUF4283 [IPR025558] (1)                                                                   | -                               | -                            | P_trifoliata_00168_mRNA_2.1     |
| GF0046270 | 0                            | 0                         | 0                            | 1 Hypothetical protein (1)                                |                                                                                                                                                                                                                                                                                                                                                           |                                                                                                                                                                                                                                                                                                          | -                               | -                            | P_trifoliata_00168_mRNA_1.9     |
| GF0046269 | 0                            | 0                         | 0                            | 1 Hypothetical protein (1)                                | nucleic acid binding [GO:0003676]; molecular_function (1); nucleus [GO:0005634]; cellular_component (1)                                                                                                                                                                                                                                                   | Cleavage/polyadenylation specificity factor, A subunit, C-terminal [IPR004871] (1)                                                                                                                                                                                                                       | -                               | -                            | P_trifoliata_00168_mRNA_1.8     |
| GF0046268 | 0                            | 0                         | 0                            | 1 Hypothetical protein (1)                                | protein binding [GO:0005515]; molecular_function (1); protein kinase activity [GO:0004672]; biological_process (1); protein phosphorylation [GO:0006468]; biological_process (1); ATP binding [GO:0005524]; molecular_function (1)                                                                                                                        | Protein kinase domain [IPR000719] (1); Concavalin A-like lectin/glycanase domain [IPR013230] (1); Protein kinase-like domain [IPR01009] (1); Leucine-rich repeat domain, L domain-like [IPR032675] (1); Protein kinase, ATP binding site [IPR017411] (1); Leucine-rich repeat [IPR001611] (1)            | -                               | -                            | P_trifoliata_00168_mRNA_1.3     |
| GF0046267 | 0                            | 0                         | 0                            | 1 Hypothetical protein (1)                                |                                                                                                                                                                                                                                                                                                                                                           |                                                                                                                                                                                                                                                                                                          | -                               | -                            | P_trifoliata_00167_mRNA_8.1     |
| GF0046266 | 0                            | 0                         | 0                            | 1 Hypothetical protein (1)                                |                                                                                                                                                                                                                                                                                                                                                           |                                                                                                                                                                                                                                                                                                          | -                               | -                            | P_trifoliata_00167_mRNA_7.1     |
| GF0046265 | 0                            | 0                         | 0                            | 1 Hypothetical protein (1)                                |                                                                                                                                                                                                                                                                                                                                                           |                                                                                                                                                                                                                                                                                                          | -                               | -                            | P_trifoliata_00167_mRNA_5.1     |
| GF0046264 | 0                            | 0                         | 0                            | 1 Hypothetical protein (1)                                |                                                                                                                                                                                                                                                                                                                                                           |                                                                                                                                                                                                                                                                                                          | -                               | -                            | P_trifoliata_00167_mRNA_3.2     |
| GF0046263 | 0                            | 0                         | 0                            | 1 Nodulation signaling pathway 2-like protein (1)         |                                                                                                                                                                                                                                                                                                                                                           |                                                                                                                                                                                                                                                                                                          | -                               | -                            | P_trifoliata_00167_mRNA_2.9     |
| GF0046262 | 0                            | 0                         | 0                            | 1 Hypothetical protein (1)                                | regulation of transcription, DNA-templated [GO:0006355]; biological_process (1)                                                                                                                                                                                                                                                                           | FAR1 DNA binding domain [IPR004330] (1); FRY3/FAR1 family [IPR031052] (1)                                                                                                                                                                                                                                | -                               | -                            | P_trifoliata_00167_mRNA_2.8     |
| GF0046261 | 0                            | 0                         | 0                            | 1 Hypothetical protein (1)                                |                                                                                                                                                                                                                                                                                                                                                           |                                                                                                                                                                                                                                                                                                          | -                               | -                            | P_trifoliata_00167_mRNA_1.9     |
| GF0046260 | 0                            | 0                         | 0                            | 1 Hypothetical protein (1)                                |                                                                                                                                                                                                                                                                                                                                                           |                                                                                                                                                                                                                                                                                                          | -                               | -                            | P_trifoliata_00167_mRNA_1.6     |
| GF0046259 | 0                            | 0                         | 0                            | 1 Hypothetical protein (1)                                |                                                                                                                                                                                                                                                                                                                                                           |                                                                                                                                                                                                                                                                                                          | -                               | -                            | P_trifoliata_00167_mRNA_1.4     |
| GF0046258 | 0                            | 0                         | 0                            | 1 Hypothetical protein (1)                                |                                                                                                                                                                                                                                                                                                                                                           |                                                                                                                                                                                                                                                                                                          | -                               | -                            | P_trifoliata_00167_mRNA_1.1     |
| GF0046257 | 0                            | 0                         | 0                            | 1 Verticillium wilt resistance-like protein (1)           | protein binding [GO:0005515]; molecular_function (1)                                                                                                                                                                                                                                                                                                      | Leucine-rich repeat [IPR001611] (1); Leucine-rich repeat-containing N-terminal, plant-type [IPR013210] (1); Leucine-rich repeat domain, L domain-like [IPR032675] (1); Leucine-rich repeat, typical subtype [IPR003591] (1)                                                                              | -                               | -                            | P_trifoliata_00167_mRNA_1.0     |
| GF0046256 | 0                            | 0                         | 0                            | 1 Hypothetical protein (1)                                | integral component of membrane [GO:0016021]; cellular_component (1); transmembrane transporter activity [GO:0022857]; molecular_function (1); transmembrane transport [GO:005085]; biological_process (1)                                                                                                                                                 | Major facilitator superfamily domain [IPR020846] (1); Major facilitator, sugar transporter-like [IPR005828] (1)                                                                                                                                                                                          | -                               | -                            | P_trifoliata_00166_mRNA_5.8     |
| GF0046255 | 0                            | 0                         | 0                            | 1 Hypothetical protein (1)                                |                                                                                                                                                                                                                                                                                                                                                           |                                                                                                                                                                                                                                                                                                          | -                               | -                            | P_trifoliata_00166_mRNA_4.8     |
| GF0046254 | 0                            | 0                         | 0                            | 1 Hypothetical protein (1)                                | protein binding [GO:0005515]; molecular_function (1)                                                                                                                                                                                                                                                                                                      | F-box domain [IPR001810] (1)                                                                                                                                                                                                                                                                             | -                               | -                            | P_trifoliata_00166_mRNA_4.3     |
| GF0046253 | 0                            | 0                         | 0                            | 1 Hypothetical protein (1)                                |                                                                                                                                                                                                                                                                                                                                                           |                                                                                                                                                                                                                                                                                                          | -                               | -                            | P_trifoliata_00166_mRNA_4.0     |
| GF0046252 | 0                            | 0                         | 0                            | 1 Hypothetical protein (1)                                | ion transport [GO:0006811]; biological_process (1); transmembrane transport [GO:0055885]; biological_process (1); catalytic activity [GO:0003824]; molecular_function (1); ion channel activity [GO:0005216]; molecular_function (1); nucleoside biosynthetic process [GO:0005992]; biological_process (1); membrane [GO:0016020]; cellular_component (1) | Cyclic nucleotide-binding domain [IPR00895] (1); Trehalose-phosphatase [IPR003377] (1); Cyclic nucleotide-binding-like [IPR018490] (1); Ribosomal protein L2, domain 2 [IPR014726] (1); Ion transport domain [IPR00821] (1); Ran/C-like jelly roll fold [IPR014710] (1); HAD-like domain [IPR023214] (1) | -                               | -                            | P_trifoliata_00166_mRNA_2.4     |

| ID        | Num. in <i>C. colemanii</i> | Num. in <i>C. aurilio</i> | Num. in <i>P. trifoliata</i> | Note                                                                     | GO                                                                                                                                                                                                                                                                                                                            | InterPro                                                                                                                                                                                          | Members in <i>C. colemanii</i> | Members in <i>C. aurilio</i> | Members in <i>P. trifoliata</i> |
|-----------|-----------------------------|---------------------------|------------------------------|--------------------------------------------------------------------------|-------------------------------------------------------------------------------------------------------------------------------------------------------------------------------------------------------------------------------------------------------------------------------------------------------------------------------|---------------------------------------------------------------------------------------------------------------------------------------------------------------------------------------------------|--------------------------------|------------------------------|---------------------------------|
| GF0046251 | 0                           | 0                         | 1                            | Hypothetical protein (1)                                                 |                                                                                                                                                                                                                                                                                                                               |                                                                                                                                                                                                   |                                |                              | P_trifoliata_00166_mRNA_23.1    |
| GF0046250 | 0                           | 0                         | 1                            | Hypothetical protein (1)                                                 |                                                                                                                                                                                                                                                                                                                               |                                                                                                                                                                                                   |                                |                              | P_trifoliata_00166_mRNA_21.1    |
| GF0046249 | 0                           | 0                         | 1                            | Hypothetical protein (1)                                                 |                                                                                                                                                                                                                                                                                                                               |                                                                                                                                                                                                   |                                |                              | P_trifoliata_00166_mRNA_19.1    |
| GF0046248 | 0                           | 0                         | 1                            | Hypothetical protein (1)                                                 |                                                                                                                                                                                                                                                                                                                               |                                                                                                                                                                                                   |                                |                              | P_trifoliata_00166_mRNA_15.1    |
| GF0046247 | 0                           | 0                         | 1                            | Hypothetical protein (1)                                                 |                                                                                                                                                                                                                                                                                                                               |                                                                                                                                                                                                   |                                |                              | P_trifoliata_00165_mRNA_7.1     |
| GF0046246 | 0                           | 0                         | 1                            | Hypothetical protein (1)                                                 |                                                                                                                                                                                                                                                                                                                               |                                                                                                                                                                                                   |                                |                              | P_trifoliata_00165_mRNA_6.1     |
| GF0046245 | 0                           | 0                         | 1                            | Hypothetical protein (1)                                                 |                                                                                                                                                                                                                                                                                                                               |                                                                                                                                                                                                   |                                |                              | P_trifoliata_00165_mRNA_59.1    |
| GF0046244 | 0                           | 0                         | 1                            | Hypothetical protein (1)                                                 | membrane [GO:0016020]<br>cellular_component (1); ionotropic glutamate receptor activity [GO:0004970]<br>molecular_function (1)                                                                                                                                                                                                | Ionotropic glutamate receptor [IPR001320] (1)                                                                                                                                                     |                                |                              | P_trifoliata_00165_mRNA_52.1    |
| GF0046243 | 0                           | 0                         | 1                            | Hypothetical protein (1)                                                 |                                                                                                                                                                                                                                                                                                                               |                                                                                                                                                                                                   |                                |                              | P_trifoliata_00165_mRNA_51.1    |
| GF0046242 | 0                           | 0                         | 1                            | Hypothetical protein (1)                                                 |                                                                                                                                                                                                                                                                                                                               |                                                                                                                                                                                                   |                                |                              | P_trifoliata_00165_mRNA_34.1    |
| GF0046241 | 0                           | 0                         | 1                            | Hypothetical protein (1)                                                 |                                                                                                                                                                                                                                                                                                                               |                                                                                                                                                                                                   |                                |                              | P_trifoliata_00165_mRNA_31.1    |
| GF0046240 | 0                           | 0                         | 1                            | Hypothetical protein (1)                                                 |                                                                                                                                                                                                                                                                                                                               |                                                                                                                                                                                                   |                                |                              | P_trifoliata_00165_mRNA_27.1    |
| GF0046239 | 0                           | 0                         | 1                            | Hypothetical protein (1)                                                 |                                                                                                                                                                                                                                                                                                                               |                                                                                                                                                                                                   |                                |                              | P_trifoliata_00165_mRNA_2.1     |
| GF0046238 | 0                           | 0                         | 1                            | DnaJ like subfamily B member 13 (1)                                      | unfolded protein binding [GO:0051082]<br>molecular_function (1); protein folding [GO:0006457]<br>biological_process (1)                                                                                                                                                                                                       | HSP40/DnaJ peptide-binding [IPR008971] (1); Chaperone DnaJ, C-terminal [IPR02939] (1)                                                                                                             |                                |                              | P_trifoliata_00165_mRNA_19.1    |
| GF0046237 | 0                           | 0                         | 1                            | Hypothetical protein (1)                                                 |                                                                                                                                                                                                                                                                                                                               |                                                                                                                                                                                                   |                                |                              | P_trifoliata_00165_mRNA_15.1    |
| GF0046236 | 0                           | 0                         | 1                            | Hypothetical protein (1)                                                 | binding [GO:0005488]<br>molecular_function (1)                                                                                                                                                                                                                                                                                | Armadillo-type fold [IPR016024] (1)                                                                                                                                                               |                                |                              | P_trifoliata_00165_mRNA_1.1     |
| GF0046235 | 0                           | 0                         | 1                            | Hypothetical protein (1)                                                 |                                                                                                                                                                                                                                                                                                                               |                                                                                                                                                                                                   |                                |                              | P_trifoliata_00164_mRNA_9.1     |
| GF0046234 | 0                           | 0                         | 1                            | Hypothetical protein (1)                                                 | nucleic acid binding [GO:0003676]<br>molecular_function (1)                                                                                                                                                                                                                                                                   | Ribonuclease H-like domain [IPR012337] (1)                                                                                                                                                        |                                |                              | P_trifoliata_00164_mRNA_40.1    |
| GF0046233 | 0                           | 0                         | 1                            | Hypothetical protein (1)                                                 | serine-type carboxypeptidase activity [GO:000185]<br>molecular_function (1); proteolysis [GO:0006508]<br>biological_process (1)                                                                                                                                                                                               | Serine carboxypeptidase, serine active site [IPR018202] (1); Alpha/Beta hydrolase fold [IPR029058] (1);<br>Peptidase S10; serine carboxypeptidase [IPR001563] (1)                                 |                                |                              | P_trifoliata_00164_mRNA_35.1    |
| GF0046232 | 0                           | 0                         | 1                            | Hypothetical protein (1)                                                 |                                                                                                                                                                                                                                                                                                                               |                                                                                                                                                                                                   |                                |                              | P_trifoliata_00164_mRNA_29.1    |
| GF0046231 | 0                           | 0                         | 1                            | Hypothetical protein (1)                                                 |                                                                                                                                                                                                                                                                                                                               |                                                                                                                                                                                                   |                                |                              | P_trifoliata_00164_mRNA_25.1    |
| GF0046230 | 0                           | 0                         | 1                            | Hypothetical protein (1)                                                 |                                                                                                                                                                                                                                                                                                                               |                                                                                                                                                                                                   |                                |                              | P_trifoliata_00164_mRNA_24.1    |
| GF0046229 | 0                           | 0                         | 1                            | Hypothetical protein (1)                                                 |                                                                                                                                                                                                                                                                                                                               |                                                                                                                                                                                                   |                                |                              | P_trifoliata_00164_mRNA_23.1    |
| GF0046228 | 0                           | 0                         | 1                            | Hypothetical protein (1)                                                 |                                                                                                                                                                                                                                                                                                                               |                                                                                                                                                                                                   |                                |                              | P_trifoliata_00164_mRNA_21.1    |
| GF0046227 | 0                           | 0                         | 1                            | Hypothetical protein (1)                                                 |                                                                                                                                                                                                                                                                                                                               |                                                                                                                                                                                                   |                                |                              | P_trifoliata_00164_mRNA_20.1    |
| GF0046226 | 0                           | 0                         | 1                            | Hypothetical protein (1)                                                 |                                                                                                                                                                                                                                                                                                                               |                                                                                                                                                                                                   |                                |                              | P_trifoliata_00164_mRNA_19.1    |
| GF0046225 | 0                           | 0                         | 1                            | Hypothetical protein (1)                                                 |                                                                                                                                                                                                                                                                                                                               |                                                                                                                                                                                                   |                                |                              | P_trifoliata_00164_mRNA_18.1    |
| GF0046224 | 0                           | 0                         | 1                            | Hypothetical protein (1)                                                 |                                                                                                                                                                                                                                                                                                                               |                                                                                                                                                                                                   |                                |                              | P_trifoliata_00164_mRNA_17.1    |
| GF0046223 | 0                           | 0                         | 1                            | Hypothetical protein (1)                                                 |                                                                                                                                                                                                                                                                                                                               |                                                                                                                                                                                                   |                                |                              | P_trifoliata_00164_mRNA_15.1    |
| GF0046222 | 0                           | 0                         | 1                            | Hypothetical protein (1)                                                 |                                                                                                                                                                                                                                                                                                                               |                                                                                                                                                                                                   |                                |                              | P_trifoliata_00164_mRNA_14.1    |
| GF0046221 | 0                           | 0                         | 1                            | Hypothetical protein (1)                                                 |                                                                                                                                                                                                                                                                                                                               |                                                                                                                                                                                                   |                                |                              | P_trifoliata_00164_mRNA_12.1    |
| GF0046220 | 0                           | 0                         | 1                            | Hypothetical protein (1)                                                 |                                                                                                                                                                                                                                                                                                                               |                                                                                                                                                                                                   |                                |                              | P_trifoliata_00164_mRNA_1.1     |
| GF0046219 | 0                           | 0                         | 1                            | Hypothetical protein (1)                                                 | protein binding [GO:0005515]<br>molecular_function (1)                                                                                                                                                                                                                                                                        | F-box domain [IPR01810] (1)                                                                                                                                                                       |                                |                              | P_trifoliata_00163_mRNA_68.1    |
| GF0046218 | 0                           | 0                         | 1                            | Hypothetical protein (1)                                                 |                                                                                                                                                                                                                                                                                                                               |                                                                                                                                                                                                   |                                |                              | P_trifoliata_00163_mRNA_64.1    |
| GF0046217 | 0                           | 0                         | 1                            | Hypothetical protein (1)                                                 |                                                                                                                                                                                                                                                                                                                               |                                                                                                                                                                                                   |                                |                              | P_trifoliata_00163_mRNA_63.1    |
| GF0046216 | 0                           | 0                         | 1                            | Hypothetical protein (1)                                                 |                                                                                                                                                                                                                                                                                                                               |                                                                                                                                                                                                   |                                |                              | P_trifoliata_00163_mRNA_6.1     |
| GF0046215 | 0                           | 0                         | 1                            | Putative WRKY transcription factor 70 (1)                                | regulation of transcription, DNA-templated [GO:0006355]<br>biological_process (1); sequence-specific DNA binding [GO:0043565]<br>molecular_function (1); transcription factor activity, sequence-specific DNA binding [GO:0003700]<br>molecular_function (1)                                                                  | WRKY domain [IPR003657] (1)                                                                                                                                                                       |                                |                              | P_trifoliata_00163_mRNA_56.1    |
| GF0046214 | 0                           | 0                         | 1                            | Hypothetical protein (1)                                                 |                                                                                                                                                                                                                                                                                                                               |                                                                                                                                                                                                   |                                |                              | P_trifoliata_00163_mRNA_54.1    |
| GF0046213 | 0                           | 0                         | 1                            | Hypothetical protein (1)                                                 |                                                                                                                                                                                                                                                                                                                               |                                                                                                                                                                                                   |                                |                              | P_trifoliata_00163_mRNA_47.1    |
| GF0046212 | 0                           | 0                         | 1                            | Hypothetical protein (1)                                                 |                                                                                                                                                                                                                                                                                                                               |                                                                                                                                                                                                   |                                |                              | P_trifoliata_00163_mRNA_4.1     |
| GF0046211 | 0                           | 0                         | 1                            | Hypothetical protein (1)                                                 | zinc ion binding [GO:0008270]<br>molecular_function (1)                                                                                                                                                                                                                                                                       | Zinc finger, SWIM-type [IPR007527] (1); Zinc finger, PMZ-type [IPR006564] (1)                                                                                                                     |                                |                              | P_trifoliata_00163_mRNA_41.1    |
| GF0046210 | 0                           | 0                         | 1                            | Polynucleotidyl transferase, ribonuclease H-like superfamily protein (1) | nucleic acid binding [GO:0003676]<br>molecular_function (1)                                                                                                                                                                                                                                                                   | Ribonuclease H-like domain [IPR012337] (1)                                                                                                                                                        |                                |                              | P_trifoliata_00163_mRNA_10.1    |
| GF0046209 | 0                           | 0                         | 1                            | Hypothetical protein (1)                                                 |                                                                                                                                                                                                                                                                                                                               |                                                                                                                                                                                                   |                                |                              | P_trifoliata_00163_mRNA_1.1     |
| GF0046208 | 0                           | 0                         | 1                            | Hypothetical protein (1)                                                 |                                                                                                                                                                                                                                                                                                                               |                                                                                                                                                                                                   |                                |                              | P_trifoliata_00162_mRNA_62.1    |
| GF0046207 | 0                           | 0                         | 1                            | Peptide chain release factor 1 (1)                                       |                                                                                                                                                                                                                                                                                                                               |                                                                                                                                                                                                   |                                |                              | P_trifoliata_00162_mRNA_59.1    |
| GF0046206 | 0                           | 0                         | 1                            | TMV resistance protein N (1)                                             | protein binding [GO:0005515]<br>molecular_function (1); signal transduction [GO:0007165]<br>biological_process (1)                                                                                                                                                                                                            | Toll/interleukin-1 receptor homology (TIR) domain [IPR00157] (1)                                                                                                                                  |                                |                              | P_trifoliata_00162_mRNA_58.1    |
| GF0046205 | 0                           | 0                         | 1                            | Hypothetical protein (1)                                                 | protein binding [GO:0005515]<br>molecular_function (1); signal transduction [GO:0007165]<br>biological_process (1)                                                                                                                                                                                                            | Toll/interleukin-1 receptor homology (TIR) domain [IPR00157] (1); P-loop containing nucleoside triphosphate hydrolase [IPR027417] (1)                                                             |                                |                              | P_trifoliata_00162_mRNA_56.1    |
| GF0046204 | 0                           | 0                         | 1                            | Hypothetical protein (1)                                                 |                                                                                                                                                                                                                                                                                                                               |                                                                                                                                                                                                   |                                |                              | P_trifoliata_00162_mRNA_54.1    |
| GF0046203 | 0                           | 0                         | 1                            | Hypothetical protein (1)                                                 |                                                                                                                                                                                                                                                                                                                               |                                                                                                                                                                                                   |                                |                              | P_trifoliata_00162_mRNA_50.1    |
| GF0046202 | 0                           | 0                         | 1                            | Hypothetical protein (1)                                                 |                                                                                                                                                                                                                                                                                                                               |                                                                                                                                                                                                   |                                |                              | P_trifoliata_00162_mRNA_49.1    |
| GF0046201 | 0                           | 0                         | 1                            | Hypothetical protein (1)                                                 | phosphorylation signal transduction system [GO:000160]<br>biological_process (1); catalytic activity [GO:0003824]<br>molecular_function (1); signal transducer activity [GO:0004921]<br>molecular_function (1); coenzyme binding [GO:0050662]<br>molecular_function (1)                                                       | NAD(P)-binding domain [IPR016040] (1); Signal transduction histidine kinase, phosphotransfer [IPR] domain [IPR008207] (1); NAD-dependent epimerase/dehydratase, N-terminal domain [IPR001509] (1) |                                |                              | P_trifoliata_00162_mRNA_45.1    |
| GF0046200 | 0                           | 0                         | 1                            | Inosine-uridine preferring nucleoside hydrolase (1)                      |                                                                                                                                                                                                                                                                                                                               |                                                                                                                                                                                                   |                                |                              | P_trifoliata_00162_mRNA_44.1    |
| GF0046199 | 0                           | 0                         | 1                            | Hypothetical protein (1)                                                 |                                                                                                                                                                                                                                                                                                                               |                                                                                                                                                                                                   |                                |                              | P_trifoliata_00162_mRNA_4.1     |
| GF0046198 | 0                           | 0                         | 1                            | Cytochrome P450 family 88 protein (1)                                    | oxidoreductase activity, acting on paired donors, with incorporation or reduction of molecular oxygen [GO:0016705]<br>molecular_function (1); oxidation-reduction process [GO:005514]<br>biological_process (1); heme binding [GO:0020037]<br>molecular_function (1); iron ion binding [GO:0000506]<br>molecular_function (1) | Cytochrome P450, conserved site [IPR017972] (1); Cytochrome P450, E-class, group 1 [IPR002401] (1); Cytochrome P450 [IPR001128] (1)                                                               |                                |                              | P_trifoliata_00162_mRNA_33.1    |
| GF0046197 | 0                           | 0                         | 1                            | Phosphoprotein phosphatase (1)                                           |                                                                                                                                                                                                                                                                                                                               |                                                                                                                                                                                                   |                                |                              | P_trifoliata_00162_mRNA_31.1    |
| GF0046196 | 0                           | 0                         | 1                            | Hypothetical protein (1)                                                 |                                                                                                                                                                                                                                                                                                                               |                                                                                                                                                                                                   |                                |                              | P_trifoliata_00162_mRNA_3.1     |
| GF0046195 | 0                           | 0                         | 1                            | Phosphoprotein phosphatase (1)                                           |                                                                                                                                                                                                                                                                                                                               |                                                                                                                                                                                                   |                                |                              | P_trifoliata_00162_mRNA_27.1    |
| GF0046194 | 0                           | 0                         | 1                            | Hypothetical protein (1)                                                 |                                                                                                                                                                                                                                                                                                                               |                                                                                                                                                                                                   |                                |                              | P_trifoliata_00162_mRNA_23.1    |
| GF0046193 | 0                           | 0                         | 1                            | Hypothetical protein (1)                                                 | ADP binding [GO:0043531]<br>molecular_function (1)                                                                                                                                                                                                                                                                            | NB-ARC [IPR002182] (1); P-loop containing nucleoside triphosphate hydrolase [IPR027417] (1)                                                                                                       |                                |                              | P_trifoliata_00162_mRNA_12.1    |
| GF0046192 | 0                           | 0                         | 1                            | Putative disease resistance gene NBS-LRR family protein (1)              |                                                                                                                                                                                                                                                                                                                               |                                                                                                                                                                                                   |                                |                              | P_trifoliata_00162_mRNA_11.1    |
| GF0046191 | 0                           | 0                         | 1                            | Hypothetical protein (1)                                                 |                                                                                                                                                                                                                                                                                                                               |                                                                                                                                                                                                   |                                |                              | P_trifoliata_00161_mRNA_8.1     |
| GF0046190 | 0                           | 0                         | 1                            | Hypothetical protein (1)                                                 | nucleic acid binding [GO:0003676]<br>molecular_function (1)                                                                                                                                                                                                                                                                   | Ribonuclease H-like domain [IPR012337] (1)                                                                                                                                                        |                                |                              | P_trifoliata_00161_mRNA_6.1     |
| GF0046189 | 0                           | 0                         | 1                            | Hypothetical protein (1)                                                 |                                                                                                                                                                                                                                                                                                                               |                                                                                                                                                                                                   |                                |                              | P_trifoliata_00161_mRNA_40.1    |
| GF0046188 | 0                           | 0                         | 1                            | Hypothetical protein (1)                                                 |                                                                                                                                                                                                                                                                                                                               |                                                                                                                                                                                                   |                                |                              | P_trifoliata_00161_mRNA_4.1     |
| GF0046187 | 0                           | 0                         | 1                            | Hypothetical protein (1)                                                 |                                                                                                                                                                                                                                                                                                                               |                                                                                                                                                                                                   |                                |                              | P_trifoliata_00161_mRNA_38.1    |
| GF0046186 | 0                           | 0                         | 1                            | Hypothetical protein (1)                                                 |                                                                                                                                                                                                                                                                                                                               |                                                                                                                                                                                                   |                                |                              | P_trifoliata_00161_mRNA_36.1    |
| GF0046185 | 0                           | 0                         | 1                            | Hypothetical protein (1)                                                 |                                                                                                                                                                                                                                                                                                                               |                                                                                                                                                                                                   |                                |                              | P_trifoliata_00161_mRNA_35.1    |
| GF0046184 | 0                           | 0                         | 1                            | Hypothetical protein (1)                                                 |                                                                                                                                                                                                                                                                                                                               |                                                                                                                                                                                                   |                                |                              | P_trifoliata_00161_mRNA_33.1    |
| GF0046183 | 0                           | 0                         | 1                            | Hypothetical protein (1)                                                 |                                                                                                                                                                                                                                                                                                                               |                                                                                                                                                                                                   |                                |                              | P_trifoliata_00161_mRNA_14.1    |
| GF0046182 | 0                           | 0                         | 1                            | Hypothetical protein (1)                                                 |                                                                                                                                                                                                                                                                                                                               |                                                                                                                                                                                                   |                                |                              | P_trifoliata_00161_mRNA_1.1     |
| GF0046181 | 0                           | 0                         | 1                            | Hypothetical protein (1)                                                 |                                                                                                                                                                                                                                                                                                                               |                                                                                                                                                                                                   |                                |                              | P_trifoliata_00160_mRNA_9.1     |
| GF0046180 | 0                           | 0                         | 1                            | Hypothetical protein (1)                                                 |                                                                                                                                                                                                                                                                                                                               |                                                                                                                                                                                                   |                                |                              | P_trifoliata_00160_mRNA_4.1     |
| GF0046179 | 0                           | 0                         | 1                            | Hypothetical protein (1)                                                 |                                                                                                                                                                                                                                                                                                                               |                                                                                                                                                                                                   |                                |                              | P_trifoliata_00160_mRNA_38.1    |
| GF0046178 | 0                           | 0                         | 1                            | Cytokinin riboside 5'-monophosphate phosphoribohydrolase (1)             |                                                                                                                                                                                                                                                                                                                               |                                                                                                                                                                                                   |                                |                              | P_trifoliata_00160_mRNA_26.1    |
| GF0046177 | 0                           | 0                         | 1                            | Cytokinin riboside 5'-monophosphate phosphoribohydrolase (1)             |                                                                                                                                                                                                                                                                                                                               |                                                                                                                                                                                                   |                                |                              | P_trifoliata_00160_mRNA_25.1    |
| GF0046176 | 0                           | 0                         | 1                            | Hypothetical protein (1)                                                 |                                                                                                                                                                                                                                                                                                                               |                                                                                                                                                                                                   |                                |                              | P_trifoliata_00160_mRNA_21.1    |
| GF0046175 | 0                           | 0                         | 1                            | Hypothetical protein (1)                                                 |                                                                                                                                                                                                                                                                                                                               |                                                                                                                                                                                                   |                                |                              | P_trifoliata_00160_mRNA_2.1     |
| GF0046174 | 0                           | 0                         | 1                            | Hypothetical protein (1)                                                 |                                                                                                                                                                                                                                                                                                                               |                                                                                                                                                                                                   |                                |                              | P_trifoliata_00160_mRNA_19.1    |
| GF0046173 | 0                           | 0                         | 1                            | Hypothetical protein (1)                                                 |                                                                                                                                                                                                                                                                                                                               |                                                                                                                                                                                                   |                                |                              | P_trifoliata_00160_mRNA_16.1    |
| GF0046172 | 0                           | 0                         | 1                            | Hypothetical protein (1)                                                 |                                                                                                                                                                                                                                                                                                                               |                                                                                                                                                                                                   |                                |                              | P_trifoliata_00160_mRNA_1.1     |
| GF0046171 | 0                           | 0                         | 1                            | Hypothetical protein (1)                                                 |                                                                                                                                                                                                                                                                                                                               |                                                                                                                                                                                                   |                                |                              | P_trifoliata_00159_mRNA_62.1    |
| GF0046170 | 0                           | 0                         | 1                            | Hypothetical protein (1)                                                 |                                                                                                                                                                                                                                                                                                                               |                                                                                                                                                                                                   |                                |                              | P_trifoliata_00159_mRNA_61.1    |



| ID        | Num. in <i>C. clementiae</i> | Num. in <i>C. canthii</i> | Num. in <i>P. trifoliata</i> | Note                                                              | GO                                                                                                                                                                                                                                                                                                                | InterPro                                                                                                                                                                                                                                                                                                                                                                                                        | Members in <i>C. clementiae</i> | Members in <i>C. canthii</i> | Members in <i>P. trifoliata</i> |
|-----------|------------------------------|---------------------------|------------------------------|-------------------------------------------------------------------|-------------------------------------------------------------------------------------------------------------------------------------------------------------------------------------------------------------------------------------------------------------------------------------------------------------------|-----------------------------------------------------------------------------------------------------------------------------------------------------------------------------------------------------------------------------------------------------------------------------------------------------------------------------------------------------------------------------------------------------------------|---------------------------------|------------------------------|---------------------------------|
| GF0046169 | 0                            | 0                         | 1                            | Hypothetical protein (1)                                          | transferase activity, transferring acyl groups other than amino-acyl groups [GO:0016747 molecular_function] (1)                                                                                                                                                                                                   | Transferase [IPR003480] (1); Chlorophenyl acetyltransferase-like domain [IPR021213] (1)                                                                                                                                                                                                                                                                                                                         | -                               | -                            | P_trifoliata_00159_mRNA_58.1    |
| GF0046168 | 0                            | 0                         | 1                            | Hypothetical protein (1)                                          |                                                                                                                                                                                                                                                                                                                   |                                                                                                                                                                                                                                                                                                                                                                                                                 | -                               | -                            | P_trifoliata_00159_mRNA_52.1    |
| GF0046167 | 0                            | 0                         | 1                            | Hypothetical protein (1)                                          |                                                                                                                                                                                                                                                                                                                   |                                                                                                                                                                                                                                                                                                                                                                                                                 | -                               | -                            | P_trifoliata_00159_mRNA_38.1    |
| GF0046166 | 0                            | 0                         | 1                            | Hypothetical protein (1)                                          |                                                                                                                                                                                                                                                                                                                   | P-type ATPase, transmembrane domain [IPR023298] (1)                                                                                                                                                                                                                                                                                                                                                             | -                               | -                            | P_trifoliata_00159_mRNA_36.1    |
| GF0046165 | 0                            | 0                         | 1                            | Hypothetical protein (1)                                          |                                                                                                                                                                                                                                                                                                                   | P-type ATPase, transmembrane domain [IPR023298] (1); Cation-transporting P-type ATPase, C-terminal [IPR006068] (1)                                                                                                                                                                                                                                                                                              | -                               | -                            | P_trifoliata_00159_mRNA_35.1    |
| GF0046164 | 0                            | 0                         | 1                            | Hypothetical protein (1)                                          |                                                                                                                                                                                                                                                                                                                   | Mitochondrial inner membrane protein Mitofilin [IPR019133] (1)                                                                                                                                                                                                                                                                                                                                                  | -                               | -                            | P_trifoliata_00159_mRNA_33.1    |
| GF0046163 | 0                            | 0                         | 1                            | ARM repeat superfamily protein, putative isoform 1 (1)            |                                                                                                                                                                                                                                                                                                                   |                                                                                                                                                                                                                                                                                                                                                                                                                 | -                               | -                            | P_trifoliata_00159_mRNA_32.1    |
| GF0046162 | 0                            | 0                         | 1                            | Hypothetical protein (1)                                          | binding [GO:0005488 molecular_function] (1)                                                                                                                                                                                                                                                                       | Armadillo-type fold [IPR016024] (1)                                                                                                                                                                                                                                                                                                                                                                             | -                               | -                            | P_trifoliata_00159_mRNA_31.1    |
| GF0046161 | 0                            | 0                         | 1                            | Hypothetical protein (1)                                          | binding [GO:0005488 molecular_function] (1)                                                                                                                                                                                                                                                                       | Armadillo-like helical [IPR011989] (1); Armadillo-type fold [IPR016024] (1)                                                                                                                                                                                                                                                                                                                                     | -                               | -                            | P_trifoliata_00159_mRNA_28.1    |
| GF0046160 | 0                            | 0                         | 1                            | Hypothetical protein (1)                                          | binding [GO:0005488 molecular_function] (1)                                                                                                                                                                                                                                                                       | Armadillo-type fold [IPR016024] (1); Armadillo-like helical [IPR011989] (1)                                                                                                                                                                                                                                                                                                                                     | -                               | -                            | P_trifoliata_00159_mRNA_27.1    |
| GF0046159 | 0                            | 0                         | 1                            | Hypothetical protein (1)                                          |                                                                                                                                                                                                                                                                                                                   |                                                                                                                                                                                                                                                                                                                                                                                                                 | -                               | -                            | P_trifoliata_00159_mRNA_26.1    |
| GF0046158 | 0                            | 0                         | 1                            | Hypothetical protein (1)                                          |                                                                                                                                                                                                                                                                                                                   |                                                                                                                                                                                                                                                                                                                                                                                                                 | -                               | -                            | P_trifoliata_00159_mRNA_25.1    |
| GF0046157 | 0                            | 0                         | 1                            | Hypothetical protein (1)                                          |                                                                                                                                                                                                                                                                                                                   |                                                                                                                                                                                                                                                                                                                                                                                                                 | -                               | -                            | P_trifoliata_00159_mRNA_23.1    |
| GF0046156 | 0                            | 0                         | 1                            | Carbohydrate-binding protein of the ER protein (1)                |                                                                                                                                                                                                                                                                                                                   | Protein kinase-like domain [IPR011009] (1); Malectin-like carbohydrate-binding domain [IPR024788] (1)                                                                                                                                                                                                                                                                                                           | -                               | -                            | P_trifoliata_00159_mRNA_21.1    |
| GF0046155 | 0                            | 0                         | 1                            | Hypothetical protein (1)                                          | ATP binding [GO:0005524 molecular_function] (1); protein phosphorylation [GO:0006468 biological_process] (1); protein kinase activity [GO:0004672 molecular_function] (1)                                                                                                                                         | Protein kinase-like domain [IPR011009] (1); Protein kinase domain [IPR000719] (1); Serine/threonine/tyrosine-protein kinase catalytic domain [IPR001245] (1); Serine/threonine/dual specificity protein kinase, catalytic domain [IPR002290] (1); Serine/threonine-protein kinase, active site [IPR008271] (1)                                                                                                  | -                               | -                            | P_trifoliata_00159_mRNA_18.1    |
| GF0046154 | 0                            | 0                         | 1                            | Hypothetical protein (1)                                          |                                                                                                                                                                                                                                                                                                                   |                                                                                                                                                                                                                                                                                                                                                                                                                 | -                               | -                            | P_trifoliata_00159_mRNA_17.1    |
| GF0046153 | 0                            | 0                         | 1                            | Hypothetical protein (1)                                          |                                                                                                                                                                                                                                                                                                                   |                                                                                                                                                                                                                                                                                                                                                                                                                 | -                               | -                            | P_trifoliata_00159_mRNA_15.1    |
| GF0046152 | 0                            | 0                         | 1                            | Hypothetical protein (1)                                          |                                                                                                                                                                                                                                                                                                                   |                                                                                                                                                                                                                                                                                                                                                                                                                 | -                               | -                            | P_trifoliata_00159_mRNA_1.1     |
| GF0046151 | 0                            | 0                         | 1                            | Hypothetical protein (1)                                          |                                                                                                                                                                                                                                                                                                                   |                                                                                                                                                                                                                                                                                                                                                                                                                 | -                               | -                            | P_trifoliata_00158_mRNA_7.1     |
| GF0046150 | 0                            | 0                         | 1                            | Hypothetical protein (1)                                          |                                                                                                                                                                                                                                                                                                                   |                                                                                                                                                                                                                                                                                                                                                                                                                 | -                               | -                            | P_trifoliata_00158_mRNA_6.1     |
| GF0046149 | 0                            | 0                         | 1                            | Hypothetical protein (1)                                          |                                                                                                                                                                                                                                                                                                                   |                                                                                                                                                                                                                                                                                                                                                                                                                 | -                               | -                            | P_trifoliata_00158_mRNA_58.1    |
| GF0046148 | 0                            | 0                         | 1                            | Hypothetical protein (1)                                          |                                                                                                                                                                                                                                                                                                                   |                                                                                                                                                                                                                                                                                                                                                                                                                 | -                               | -                            | P_trifoliata_00158_mRNA_54.1    |
| GF0046147 | 0                            | 0                         | 1                            | Auroralike protein kinase putative (1)                            | ATP binding [GO:0005524 molecular_function] (1); protein phosphorylation [GO:0006468 biological_process] (1); protein kinase activity [GO:0004672 molecular_function] (1)                                                                                                                                         | Protein kinase-like domain [IPR011009] (1); Protein kinase domain [IPR000719] (1)                                                                                                                                                                                                                                                                                                                               | -                               | -                            | P_trifoliata_00158_mRNA_52.1    |
| GF0046146 | 0                            | 0                         | 1                            | Hypothetical protein (1)                                          |                                                                                                                                                                                                                                                                                                                   |                                                                                                                                                                                                                                                                                                                                                                                                                 | -                               | -                            | P_trifoliata_00158_mRNA_50.1    |
| GF0046145 | 0                            | 0                         | 1                            | Hypothetical protein (1)                                          | protein kinase activity [GO:0004672 molecular_function] (1); protein phosphorylation [GO:0006468 biological_process] (1)                                                                                                                                                                                          | Protein kinase-like domain [IPR011009] (1); Serine/threonine/tyrosine-protein kinase catalytic domain [IPR001245] (1); P-loop containing nucleoside triphosphate hydrolase [IPR027417] (1); Bulb-type lectin domain [IPR001480] (1); Concavalin A-like lectin/glucanase domain [IPR013320] (1)                                                                                                                  | -                               | -                            | P_trifoliata_00158_mRNA_5.1     |
| GF0046144 | 0                            | 0                         | 1                            | Hypothetical protein (1)                                          |                                                                                                                                                                                                                                                                                                                   |                                                                                                                                                                                                                                                                                                                                                                                                                 | -                               | -                            | P_trifoliata_00158_mRNA_47.1    |
| GF0046143 | 0                            | 0                         | 1                            | Hypothetical protein (1)                                          | protein phosphorylation [GO:0006468 biological_process] (1); protein kinase activity [GO:0004672 molecular_function] (1); ATP binding [GO:0005524 molecular_function] (1)                                                                                                                                         | Serine/threonine-protein kinase, active site [IPR008271] (1); Protein kinase domain [IPR000719] (1); Protein kinase-like domain [IPR011009] (1)                                                                                                                                                                                                                                                                 | -                               | -                            | P_trifoliata_00158_mRNA_46.1    |
| GF0046142 | 0                            | 0                         | 1                            | Hypothetical protein (1)                                          |                                                                                                                                                                                                                                                                                                                   |                                                                                                                                                                                                                                                                                                                                                                                                                 | -                               | -                            | P_trifoliata_00158_mRNA_45.1    |
| GF0046141 | 0                            | 0                         | 1                            | Hypothetical protein (1)                                          |                                                                                                                                                                                                                                                                                                                   |                                                                                                                                                                                                                                                                                                                                                                                                                 | -                               | -                            | P_trifoliata_00158_mRNA_41.1    |
| GF0046140 | 0                            | 0                         | 1                            | Hypothetical protein (1)                                          |                                                                                                                                                                                                                                                                                                                   |                                                                                                                                                                                                                                                                                                                                                                                                                 | -                               | -                            | P_trifoliata_00158_mRNA_40.1    |
| GF0046139 | 0                            | 0                         | 1                            | Hypothetical protein (1)                                          |                                                                                                                                                                                                                                                                                                                   |                                                                                                                                                                                                                                                                                                                                                                                                                 | -                               | -                            | P_trifoliata_00158_mRNA_39.1    |
| GF0046138 | 0                            | 0                         | 1                            | Hypothetical protein (1)                                          |                                                                                                                                                                                                                                                                                                                   |                                                                                                                                                                                                                                                                                                                                                                                                                 | -                               | -                            | P_trifoliata_00158_mRNA_38.1    |
| GF0046137 | 0                            | 0                         | 1                            | Hypothetical protein (1)                                          |                                                                                                                                                                                                                                                                                                                   |                                                                                                                                                                                                                                                                                                                                                                                                                 | -                               | -                            | P_trifoliata_00158_mRNA_37.1    |
| GF0046136 | 0                            | 0                         | 1                            | Hypothetical protein (1)                                          |                                                                                                                                                                                                                                                                                                                   |                                                                                                                                                                                                                                                                                                                                                                                                                 | -                               | -                            | P_trifoliata_00158_mRNA_35.1    |
| GF0046135 | 0                            | 0                         | 1                            | Hypothetical protein (1)                                          | zinc ion binding [GO:0003270 molecular_function] (1); nucleic acid binding [GO:0003676 molecular_function] (1)                                                                                                                                                                                                    | Zinc knuckle CX2/CXHXAC [IPR025836] (1); Zinc finger, CCHC-type [IPR001878] (1)                                                                                                                                                                                                                                                                                                                                 | -                               | -                            | P_trifoliata_00158_mRNA_33.1    |
| GF0046134 | 0                            | 0                         | 1                            | Hypothetical protein (1)                                          |                                                                                                                                                                                                                                                                                                                   |                                                                                                                                                                                                                                                                                                                                                                                                                 | -                               | -                            | P_trifoliata_00158_mRNA_32.1    |
| GF0046133 | 0                            | 0                         | 1                            | Hypothetical protein (1)                                          |                                                                                                                                                                                                                                                                                                                   |                                                                                                                                                                                                                                                                                                                                                                                                                 | -                               | -                            | P_trifoliata_00158_mRNA_3.1     |
| GF0046132 | 0                            | 0                         | 1                            | Hypothetical protein (1)                                          |                                                                                                                                                                                                                                                                                                                   |                                                                                                                                                                                                                                                                                                                                                                                                                 | -                               | -                            | P_trifoliata_00158_mRNA_28.1    |
| GF0046131 | 0                            | 0                         | 1                            | Hypothetical protein (1)                                          |                                                                                                                                                                                                                                                                                                                   | Isopenicillin N synthase-like [IPR027443] (1)                                                                                                                                                                                                                                                                                                                                                                   | -                               | -                            | P_trifoliata_00158_mRNA_27.1    |
| GF0046130 | 0                            | 0                         | 1                            | Hypothetical protein (1)                                          |                                                                                                                                                                                                                                                                                                                   |                                                                                                                                                                                                                                                                                                                                                                                                                 | -                               | -                            | P_trifoliata_00158_mRNA_26.1    |
| GF0046129 | 0                            | 0                         | 1                            | 2OG-Fe(II) oxygenase family oxidoreductase (1)                    |                                                                                                                                                                                                                                                                                                                   | Non-haem dioxygenase N-terminal domain [IPR020922] (1); Isopenicillin N synthase-like [IPR027443] (1)                                                                                                                                                                                                                                                                                                           | -                               | -                            | P_trifoliata_00158_mRNA_25.1    |
| GF0046128 | 0                            | 0                         | 1                            | Hypothetical protein (1)                                          |                                                                                                                                                                                                                                                                                                                   |                                                                                                                                                                                                                                                                                                                                                                                                                 | -                               | -                            | P_trifoliata_00158_mRNA_23.1    |
| GF0046127 | 0                            | 0                         | 1                            | Hypothetical protein (1)                                          |                                                                                                                                                                                                                                                                                                                   |                                                                                                                                                                                                                                                                                                                                                                                                                 | -                               | -                            | P_trifoliata_00158_mRNA_22.1    |
| GF0046126 | 0                            | 0                         | 1                            | Hypothetical protein (1)                                          |                                                                                                                                                                                                                                                                                                                   |                                                                                                                                                                                                                                                                                                                                                                                                                 | -                               | -                            | P_trifoliata_00158_mRNA_21.1    |
| GF0046125 | 0                            | 0                         | 1                            | Hypothetical protein (1)                                          |                                                                                                                                                                                                                                                                                                                   |                                                                                                                                                                                                                                                                                                                                                                                                                 | -                               | -                            | P_trifoliata_00158_mRNA_20.1    |
| GF0046124 | 0                            | 0                         | 1                            | LRR receptor-like kinase family protein (1)                       | protein phosphorylation [GO:0006468 biological_process] (1); protein kinase activity [GO:0004672 molecular_function] (1); ATP binding [GO:0005524 molecular_function] (1)                                                                                                                                         | Serine/threonine/dual specificity protein kinase, catalytic domain [IPR002290] (1); Serine/threonine-protein kinase, active site [IPR008271] (1); Concavalin A-like lectin/glucanase domain [IPR013320] (1); Leucine-rich repeat, typical subtype [IPR003391] (1); Protein kinase-like domain [IPR011009] (1); Leucine-rich repeat domain, L domain-like [IPR032675] (1); Protein kinase domain [IPR000719] (1) | -                               | -                            | P_trifoliata_00158_mRNA_2.1     |
| GF0046123 | 0                            | 0                         | 1                            | Hypothetical protein (1)                                          |                                                                                                                                                                                                                                                                                                                   |                                                                                                                                                                                                                                                                                                                                                                                                                 | -                               | -                            | P_trifoliata_00157_mRNA_56.1    |
| GF0046122 | 0                            | 0                         | 1                            | Hypothetical protein (1)                                          |                                                                                                                                                                                                                                                                                                                   |                                                                                                                                                                                                                                                                                                                                                                                                                 | -                               | -                            | P_trifoliata_00157_mRNA_48.1    |
| GF0046121 | 0                            | 0                         | 1                            | Hypothetical protein (1)                                          |                                                                                                                                                                                                                                                                                                                   |                                                                                                                                                                                                                                                                                                                                                                                                                 | -                               | -                            | P_trifoliata_00157_mRNA_45.1    |
| GF0046120 | 0                            | 0                         | 1                            | Hypothetical protein (1)                                          | DNA binding [GO:0003677 molecular_function] (1)                                                                                                                                                                                                                                                                   | DNA-binding pseudobared domain [IPR015300] (1); B3 DNA binding domain [IPR003340] (1)                                                                                                                                                                                                                                                                                                                           | -                               | -                            | P_trifoliata_00157_mRNA_42.1    |
| GF0046119 | 0                            | 0                         | 1                            | Hypothetical protein (1)                                          | DNA binding [GO:0003677 molecular_function] (1)                                                                                                                                                                                                                                                                   | DNA-binding pseudobared domain [IPR015300] (1)                                                                                                                                                                                                                                                                                                                                                                  | -                               | -                            | P_trifoliata_00157_mRNA_41.1    |
| GF0046118 | 0                            | 0                         | 1                            | Hypothetical protein (1)                                          | ATP binding [GO:0005524 molecular_function] (1); protein phosphorylation [GO:0006468 biological_process] (1); protein kinase activity [GO:0004672 molecular_function] (1)                                                                                                                                         | Protein kinase-like domain [IPR011009] (1); Protein kinase domain [IPR000719] (1); Serine/threonine/dual specificity protein kinase, catalytic domain [IPR002290] (1); Leucine-rich repeat-containing N-terminal, plant-type [IPR013210] (1); Serine/threonine-protein kinase, active site [IPR008271] (1)                                                                                                      | -                               | -                            | P_trifoliata_00157_mRNA_40.1    |
| GF0046117 | 0                            | 0                         | 1                            | Hypothetical protein (1)                                          |                                                                                                                                                                                                                                                                                                                   |                                                                                                                                                                                                                                                                                                                                                                                                                 | -                               | -                            | P_trifoliata_00157_mRNA_4.1     |
| GF0046116 | 0                            | 0                         | 1                            | Hypothetical protein (1)                                          |                                                                                                                                                                                                                                                                                                                   |                                                                                                                                                                                                                                                                                                                                                                                                                 | -                               | -                            | P_trifoliata_00157_mRNA_39.1    |
| GF0046115 | 0                            | 0                         | 1                            | Hypothetical protein (1)                                          |                                                                                                                                                                                                                                                                                                                   |                                                                                                                                                                                                                                                                                                                                                                                                                 | -                               | -                            | P_trifoliata_00157_mRNA_37.1    |
| GF0046114 | 0                            | 0                         | 1                            | Hypothetical protein (1)                                          | oxidation-reduction process [GO:005114 biological_process] (1); oxidoreductase activity, acting on paired donors, with incorporation or reduction of molecular oxygen [GO:0016705 molecular_function] (1); iron ion binding [GO:0005506 molecular_function] (1); heme binding [GO:0020037 molecular_function] (1) | Cytochrome P450 [IPR011128] (1)                                                                                                                                                                                                                                                                                                                                                                                 | -                               | -                            | P_trifoliata_00157_mRNA_34.1    |
| GF0046113 | 0                            | 0                         | 1                            | Hypothetical protein (1)                                          |                                                                                                                                                                                                                                                                                                                   |                                                                                                                                                                                                                                                                                                                                                                                                                 | -                               | -                            | P_trifoliata_00157_mRNA_33.1    |
| GF0046112 | 0                            | 0                         | 1                            | Hypothetical protein (1)                                          |                                                                                                                                                                                                                                                                                                                   |                                                                                                                                                                                                                                                                                                                                                                                                                 | -                               | -                            | P_trifoliata_00157_mRNA_31.1    |
| GF0046111 | 0                            | 0                         | 1                            | Ankyrin repeat family protein (1)                                 | protein binding [GO:0005515 molecular_function] (1)                                                                                                                                                                                                                                                               | Ankyrin repeat [IPR001210] (1); PLAG domain [IPR020961] (1); Ankyrin repeat-containing domain [IPR020683] (1)                                                                                                                                                                                                                                                                                                   | -                               | -                            | P_trifoliata_00157_mRNA_3.1     |
| GF0046110 | 0                            | 0                         | 1                            | Hypothetical protein (1)                                          |                                                                                                                                                                                                                                                                                                                   |                                                                                                                                                                                                                                                                                                                                                                                                                 | -                               | -                            | P_trifoliata_00157_mRNA_27.1    |
| GF0046109 | 0                            | 0                         | 1                            | Hypothetical protein (1)                                          |                                                                                                                                                                                                                                                                                                                   |                                                                                                                                                                                                                                                                                                                                                                                                                 | -                               | -                            | P_trifoliata_00157_mRNA_26.1    |
| GF0046108 | 0                            | 0                         | 1                            | Hypothetical protein (1)                                          |                                                                                                                                                                                                                                                                                                                   |                                                                                                                                                                                                                                                                                                                                                                                                                 | -                               | -                            | P_trifoliata_00157_mRNA_25.1    |
| GF0046107 | 0                            | 0                         | 1                            | Hypothetical protein (1)                                          | regulation of transcription, DNA-templated [GO:0006355 biological_process] (1)                                                                                                                                                                                                                                    | FHY3/FAR1 family [IPR031052] (1); MULE transposase domain [IPR018289] (1)                                                                                                                                                                                                                                                                                                                                       | -                               | -                            | P_trifoliata_00157_mRNA_24.1    |
| GF0046106 | 0                            | 0                         | 1                            | Hypothetical protein (1)                                          |                                                                                                                                                                                                                                                                                                                   |                                                                                                                                                                                                                                                                                                                                                                                                                 | -                               | -                            | P_trifoliata_00157_mRNA_23.1    |
| GF0046105 | 0                            | 0                         | 1                            | Cytokinin riboside 5'-monophosphate phosphoribosyltransferase (1) |                                                                                                                                                                                                                                                                                                                   |                                                                                                                                                                                                                                                                                                                                                                                                                 | -                               | -                            | P_trifoliata_00157_mRNA_22.1    |
| GF0046104 | 0                            | 0                         | 1                            | Hypothetical protein (1)                                          |                                                                                                                                                                                                                                                                                                                   |                                                                                                                                                                                                                                                                                                                                                                                                                 | -                               | -                            | P_trifoliata_00157_mRNA_19.1    |
| GF0046103 | 0                            | 0                         | 1                            | Cytokinin riboside 5'-monophosphate phosphoribosyltransferase (1) |                                                                                                                                                                                                                                                                                                                   | LOG family [IPR031100] (1)                                                                                                                                                                                                                                                                                                                                                                                      | -                               | -                            | P_trifoliata_00157_mRNA_18.1    |
| GF0046102 | 0                            | 0                         | 1                            | Hypothetical protein (1)                                          |                                                                                                                                                                                                                                                                                                                   |                                                                                                                                                                                                                                                                                                                                                                                                                 | -                               | -                            | P_trifoliata_00156_mRNA_7.1     |

| ID        | Num. in <i>C. celanense</i> | Num. in <i>C. anthoni</i> | Num. in <i>P. trifoliata</i> | Note                                                             | GO                                                                                                                                                                                                                                                                                                                                                                 | InterPro                                                                                                                                                                                                                                | Members in <i>C. celanense</i> | Members in <i>C. anthoni</i> | Members in <i>P. trifoliata</i> |
|-----------|-----------------------------|---------------------------|------------------------------|------------------------------------------------------------------|--------------------------------------------------------------------------------------------------------------------------------------------------------------------------------------------------------------------------------------------------------------------------------------------------------------------------------------------------------------------|-----------------------------------------------------------------------------------------------------------------------------------------------------------------------------------------------------------------------------------------|--------------------------------|------------------------------|---------------------------------|
| GF0046101 | 0                           | 0                         | 1                            | Hypothetical protein (1)                                         |                                                                                                                                                                                                                                                                                                                                                                    |                                                                                                                                                                                                                                         |                                |                              | P_trifoliata_00156_mRNA_4,1     |
| GF0046100 | 0                           | 0                         | 1                            | Hypothetical protein (1)                                         | transporter activity [GO:0005215 molecular_function] (1); transport [GO:0006810 biological_process] (1); membrane [GO:0016020 cellular_component] (1)                                                                                                                                                                                                              | Endonuclease/exonuclease/phosphatase [IPR005135] (1); Proton-dependent oligopeptide transporter family [IPR001099] (1)                                                                                                                  |                                |                              | P_trifoliata_00156_mRNA_32,1    |
| GF0046099 | 0                           | 0                         | 1                            | Hypothetical protein (1)                                         |                                                                                                                                                                                                                                                                                                                                                                    |                                                                                                                                                                                                                                         |                                |                              | P_trifoliata_00156_mRNA_30,1    |
| GF0046098 | 0                           | 0                         | 1                            | Hypothetical protein (1)                                         |                                                                                                                                                                                                                                                                                                                                                                    |                                                                                                                                                                                                                                         |                                |                              | P_trifoliata_00156_mRNA_25,1    |
| GF0046097 | 0                           | 0                         | 1                            | NBS-LRR class resistance protein Fy2-Ry2 (1)                     | oxidation-reduction process [GO:005114 biological_process] (1); oxidoreductase activity, acting on paired donors, with incorporation or reduction of molecular oxygen [GO:0016705 molecular_function] (1); iron ion binding [GO:0005506 molecular_function] (1); heme binding [GO:0020037 molecular_function] (1); ADP binding [GO:0045531 molecular_function] (1) | NB-ARC [IPR02182] (1); Cytochrome P450, E-class, group 1 [IPR02401] (1); P-loop containing nucleoside triphosphate hydrolase [IPR027417] (1); Cytochrome P450 [IPR01128] (1); Leucine-rich repeat domain, L domain-like [IPR032675] (1) |                                |                              | P_trifoliata_00155_mRNA_8,1     |
| GF0046096 | 0                           | 0                         | 1                            | Hypothetical protein (1)                                         |                                                                                                                                                                                                                                                                                                                                                                    |                                                                                                                                                                                                                                         |                                |                              | P_trifoliata_00155_mRNA_6,1     |
| GF0046095 | 0                           | 0                         | 1                            | Hypothetical protein (1)                                         |                                                                                                                                                                                                                                                                                                                                                                    |                                                                                                                                                                                                                                         |                                |                              | P_trifoliata_00155_mRNA_50,1    |
| GF0046094 | 0                           | 0                         | 1                            | Hypothetical protein (1)                                         | nucleic acid binding [GO:0003676 molecular_function] (1); zinc ion binding [GO:0008270 molecular_function] (1)                                                                                                                                                                                                                                                     | Zinc finger, CCHC-type [IPR01878] (1)                                                                                                                                                                                                   |                                |                              | P_trifoliata_00155_mRNA_46,1    |
| GF0046093 | 0                           | 0                         | 1                            | Hypothetical protein (1)                                         |                                                                                                                                                                                                                                                                                                                                                                    |                                                                                                                                                                                                                                         |                                |                              | P_trifoliata_00155_mRNA_45,1    |
| GF0046092 | 0                           | 0                         | 1                            | Hypothetical protein (1)                                         |                                                                                                                                                                                                                                                                                                                                                                    |                                                                                                                                                                                                                                         |                                |                              | P_trifoliata_00155_mRNA_43,1    |
| GF0046091 | 0                           | 0                         | 1                            | Hypothetical protein (1)                                         |                                                                                                                                                                                                                                                                                                                                                                    |                                                                                                                                                                                                                                         |                                |                              | P_trifoliata_00155_mRNA_41,1    |
| GF0046090 | 0                           | 0                         | 1                            | Hypothetical protein (1)                                         |                                                                                                                                                                                                                                                                                                                                                                    |                                                                                                                                                                                                                                         |                                |                              | P_trifoliata_00155_mRNA_39,1    |
| GF0046089 | 0                           | 0                         | 1                            | Hypothetical protein (1)                                         |                                                                                                                                                                                                                                                                                                                                                                    |                                                                                                                                                                                                                                         |                                |                              | P_trifoliata_00155_mRNA_36,1    |
| GF0046088 | 0                           | 0                         | 1                            | Hypothetical protein (1)                                         |                                                                                                                                                                                                                                                                                                                                                                    |                                                                                                                                                                                                                                         |                                |                              | P_trifoliata_00155_mRNA_35,1    |
| GF0046087 | 0                           | 0                         | 1                            | Hypothetical protein (1)                                         |                                                                                                                                                                                                                                                                                                                                                                    |                                                                                                                                                                                                                                         |                                |                              | P_trifoliata_00155_mRNA_32,1    |
| GF0046086 | 0                           | 0                         | 1                            | Hypothetical protein (1)                                         |                                                                                                                                                                                                                                                                                                                                                                    |                                                                                                                                                                                                                                         |                                |                              | P_trifoliata_00155_mRNA_31,1    |
| GF0046085 | 0                           | 0                         | 1                            | Hypothetical protein (1)                                         | nucleic acid binding [GO:0003676 molecular_function] (1)                                                                                                                                                                                                                                                                                                           | Ribonuclease H-like domain [IPR012337] (1)                                                                                                                                                                                              |                                |                              | P_trifoliata_00155_mRNA_28,1    |
| GF0046084 | 0                           | 0                         | 1                            | Steroid 5-alpha-reductase DET2 (1)                               | cytoplasm [GO:0005737 cellular_component] (1); lipid metabolic process [GO:0006629 biological_process] (1); oxidoreductase activity, acting on the C1=C1 group of donors [GO:0016627 molecular_function] (1); integral component of membrane [GO:0016021 cellular_component] (1)                                                                                   | 3-oxo-5-alpha-steroid 4-dehydrogenase, C-terminal [IPR01104] (1)                                                                                                                                                                        |                                |                              | P_trifoliata_00155_mRNA_27,1    |
| GF0046083 | 0                           | 0                         | 1                            | Cytokinin riboside 5'-monophosphate phosphoribohydrolase (1)     |                                                                                                                                                                                                                                                                                                                                                                    |                                                                                                                                                                                                                                         |                                |                              | P_trifoliata_00155_mRNA_26,1    |
| GF0046082 | 0                           | 0                         | 1                            | Putative steroid reductase DET2 (1)                              | integral component of membrane [GO:0016021 cellular_component] (1); oxidoreductase activity, acting on the C1=C1 group of donors [GO:0016627 molecular_function] (1); lipid metabolic process [GO:0006629 biological_process] (1); cytoplasm [GO:0005737 cellular_component] (1)                                                                                   | 3-oxo-5-alpha-steroid 4-dehydrogenase, C-terminal [IPR01104] (1)                                                                                                                                                                        |                                |                              | P_trifoliata_00155_mRNA_25,1    |
| GF0046081 | 0                           | 0                         | 1                            | Hypothetical protein (1)                                         |                                                                                                                                                                                                                                                                                                                                                                    |                                                                                                                                                                                                                                         |                                |                              | P_trifoliata_00155_mRNA_23,1    |
| GF0046080 | 0                           | 0                         | 1                            | Hypothetical protein (1)                                         |                                                                                                                                                                                                                                                                                                                                                                    |                                                                                                                                                                                                                                         |                                |                              | P_trifoliata_00155_mRNA_20,1    |
| GF0046079 | 0                           | 0                         | 1                            | Hypothetical protein (1)                                         |                                                                                                                                                                                                                                                                                                                                                                    |                                                                                                                                                                                                                                         |                                |                              | P_trifoliata_00155_mRNA_18,1    |
| GF0046078 | 0                           | 0                         | 1                            | Hypothetical protein (1)                                         |                                                                                                                                                                                                                                                                                                                                                                    |                                                                                                                                                                                                                                         |                                |                              | P_trifoliata_00155_mRNA_16,1    |
| GF0046077 | 0                           | 0                         | 1                            | Hypothetical protein (1)                                         |                                                                                                                                                                                                                                                                                                                                                                    |                                                                                                                                                                                                                                         |                                |                              | P_trifoliata_00155_mRNA_15,1    |
| GF0046076 | 0                           | 0                         | 1                            | Hypothetical protein (1)                                         |                                                                                                                                                                                                                                                                                                                                                                    |                                                                                                                                                                                                                                         |                                |                              | P_trifoliata_00155_mRNA_12,1    |
| GF0046075 | 0                           | 0                         | 1                            | Hypothetical protein (1)                                         |                                                                                                                                                                                                                                                                                                                                                                    |                                                                                                                                                                                                                                         |                                |                              | P_trifoliata_00155_mRNA_11,1    |
| GF0046074 | 0                           | 0                         | 1                            | Hypothetical protein (1)                                         |                                                                                                                                                                                                                                                                                                                                                                    |                                                                                                                                                                                                                                         |                                |                              | P_trifoliata_00155_mRNA_1,1     |
| GF0046073 | 0                           | 0                         | 1                            | Kunitz trypsin inhibitor (1)                                     | endopeptidase inhibitor activity [GO:0004866 molecular_function] (1)                                                                                                                                                                                                                                                                                               | Kunitz inhibitor ST1-like [IPR11065] (1); Protease inhibitor 13, Kunitz legume [IPR02160] (1)                                                                                                                                           |                                |                              | P_trifoliata_00154_mRNA_57,1    |
| GF0046072 | 0                           | 0                         | 1                            | Hypothetical protein (1)                                         |                                                                                                                                                                                                                                                                                                                                                                    |                                                                                                                                                                                                                                         |                                |                              | P_trifoliata_00154_mRNA_56,1    |
| GF0046071 | 0                           | 0                         | 1                            | Hypothetical protein (1)                                         |                                                                                                                                                                                                                                                                                                                                                                    |                                                                                                                                                                                                                                         |                                |                              | P_trifoliata_00154_mRNA_55,1    |
| GF0046070 | 0                           | 0                         | 1                            | Hypothetical protein (1)                                         | nucleic acid binding [GO:0003676 molecular_function] (1)                                                                                                                                                                                                                                                                                                           | Ribonuclease H-like domain [IPR012337] (1)                                                                                                                                                                                              |                                |                              | P_trifoliata_00154_mRNA_54,1    |
| GF0046069 | 0                           | 0                         | 1                            | Hypothetical protein (1)                                         |                                                                                                                                                                                                                                                                                                                                                                    |                                                                                                                                                                                                                                         |                                |                              | P_trifoliata_00154_mRNA_4,1     |
| GF0046068 | 0                           | 0                         | 1                            | Transposable element protein, putative, (1)                      |                                                                                                                                                                                                                                                                                                                                                                    | Retrosposon gag domain [IPR005162] (1)                                                                                                                                                                                                  |                                |                              | P_trifoliata_00154_mRNA_35,1    |
| GF0046067 | 0                           | 0                         | 1                            | P-loop nucleoside triphosphate hydrolase superfamily protein (1) | ATP binding [GO:0005524 molecular_function] (1)                                                                                                                                                                                                                                                                                                                    | UvrD-like Helicase, ATP-binding domain [IPR014016] (1); P-loop containing nucleoside triphosphate hydrolase [IPR027417] (1)                                                                                                             |                                |                              | P_trifoliata_00154_mRNA_34,1    |
| GF0046066 | 0                           | 0                         | 1                            | Hypothetical protein (1)                                         | nucleic acid binding [GO:0003676 molecular_function] (1)                                                                                                                                                                                                                                                                                                           | Ribonuclease H-like domain [IPR012337] (1)                                                                                                                                                                                              |                                |                              | P_trifoliata_00154_mRNA_33,1    |
| GF0046065 | 0                           | 0                         | 1                            | Hypothetical protein (1)                                         |                                                                                                                                                                                                                                                                                                                                                                    |                                                                                                                                                                                                                                         |                                |                              | P_trifoliata_00154_mRNA_31,1    |
| GF0046064 | 0                           | 0                         | 1                            | Hypothetical protein (1)                                         | oxidation-reduction process [GO:005114 biological_process] (1); peroxidase activity [GO:0004661 molecular_function] (1); response to oxidative stress [GO:0006979 biological_process] (1); heme binding [GO:0020037 molecular_function] (1)                                                                                                                        | Haem peroxidase, plant/fungal/bacterial [IPR02016] (1); Haem peroxidase [IPR010255] (1)                                                                                                                                                 |                                |                              | P_trifoliata_00154_mRNA_30,1    |
| GF0046063 | 0                           | 0                         | 1                            | Hypothetical protein (1)                                         |                                                                                                                                                                                                                                                                                                                                                                    |                                                                                                                                                                                                                                         |                                |                              | P_trifoliata_00154_mRNA_29,1    |
| GF0046062 | 0                           | 0                         | 1                            | Hypothetical protein (1)                                         |                                                                                                                                                                                                                                                                                                                                                                    |                                                                                                                                                                                                                                         |                                |                              | P_trifoliata_00154_mRNA_27,1    |
| GF0046061 | 0                           | 0                         | 1                            | Hypothetical protein (1)                                         |                                                                                                                                                                                                                                                                                                                                                                    |                                                                                                                                                                                                                                         |                                |                              | P_trifoliata_00154_mRNA_21,1    |
| GF0046060 | 0                           | 0                         | 1                            | Hypothetical protein (1)                                         |                                                                                                                                                                                                                                                                                                                                                                    | MULE transposase domain [IPR018289] (1)                                                                                                                                                                                                 |                                |                              | P_trifoliata_00154_mRNA_2,1     |
| GF0046059 | 0                           | 0                         | 1                            | Hypothetical protein (1)                                         |                                                                                                                                                                                                                                                                                                                                                                    |                                                                                                                                                                                                                                         |                                |                              | P_trifoliata_00154_mRNA_18,1    |
| GF0046058 | 0                           | 0                         | 1                            | Hypothetical protein (1)                                         | nucleic acid binding [GO:0003676 molecular_function] (1); protein dimerization activity [GO:0046983 molecular_function] (1)                                                                                                                                                                                                                                        | Ribonuclease H-like domain [IPR012337] (1); HAT, C-terminal dimerization domain [IPR008906] (1)                                                                                                                                         |                                |                              | P_trifoliata_00154_mRNA_17,1    |
| GF0046057 | 0                           | 0                         | 1                            | Sulfotransferase (1)                                             | sulfotransferase activity [GO:0008146 molecular_function] (1)                                                                                                                                                                                                                                                                                                      | P-loop containing nucleoside triphosphate hydrolase [IPR027417] (1); Sulfotransferase domain [IPR000663] (1)                                                                                                                            |                                |                              | P_trifoliata_00154_mRNA_1,1     |
| GF0046056 | 0                           | 0                         | 1                            | Hypothetical protein (1)                                         |                                                                                                                                                                                                                                                                                                                                                                    |                                                                                                                                                                                                                                         |                                |                              | P_trifoliata_00153_mRNA_9,1     |
| GF0046055 | 0                           | 0                         | 1                            | UDP-glycosyltransferase 91C1 (1)                                 | transferase activity, transferring hexosyl groups [GO:0016758 molecular_function] (1); metabolic process [GO:0008152 biological_process] (1)                                                                                                                                                                                                                       | UDP-glycosyltransferase [IPR02213] (1)                                                                                                                                                                                                  |                                |                              | P_trifoliata_00153_mRNA_56,1    |
| GF0046054 | 0                           | 0                         | 1                            | Hypothetical protein (1)                                         |                                                                                                                                                                                                                                                                                                                                                                    |                                                                                                                                                                                                                                         |                                |                              | P_trifoliata_00153_mRNA_53,1    |
| GF0046053 | 0                           | 0                         | 1                            | Hypothetical protein (1)                                         |                                                                                                                                                                                                                                                                                                                                                                    |                                                                                                                                                                                                                                         |                                |                              | P_trifoliata_00153_mRNA_48,1    |
| GF0046052 | 0                           | 0                         | 1                            | Hypothetical protein (1)                                         | metabolic process [GO:0008152 biological_process] (1); terpene synthase activity [GO:0010333 molecular_function] (1); lyase activity [GO:0016529 molecular_function] (1)                                                                                                                                                                                           | Terpene synthase, N-terminal domain [IPR001906] (1); Terpenoid cyclase:protein prenyltransferase alpha-alpha teroid [IPR008930] (1)                                                                                                     |                                |                              | P_trifoliata_00153_mRNA_34,1    |
| GF0046051 | 0                           | 0                         | 1                            | Hypothetical protein (1)                                         | protein binding [GO:0005515 molecular_function] (1)                                                                                                                                                                                                                                                                                                                | F-box domain [IPR01810] (1); Kechb-type beta propeller [IPR015915] (1)                                                                                                                                                                  |                                |                              | P_trifoliata_00153_mRNA_28,1    |
| GF0046050 | 0                           | 0                         | 1                            | Hypothetical protein (1)                                         |                                                                                                                                                                                                                                                                                                                                                                    |                                                                                                                                                                                                                                         |                                |                              | P_trifoliata_00153_mRNA_27,1    |
| GF0046049 | 0                           | 0                         | 1                            | Hypothetical protein (1)                                         |                                                                                                                                                                                                                                                                                                                                                                    |                                                                                                                                                                                                                                         |                                |                              | P_trifoliata_00153_mRNA_24,1    |
| GF0046048 | 0                           | 0                         | 1                            | Hypothetical protein (1)                                         |                                                                                                                                                                                                                                                                                                                                                                    |                                                                                                                                                                                                                                         |                                |                              | P_trifoliata_00153_mRNA_23,1    |
| GF0046047 | 0                           | 0                         | 1                            | Hypothetical protein (1)                                         |                                                                                                                                                                                                                                                                                                                                                                    | P-loop containing nucleoside triphosphate hydrolase [IPR027417] (1)                                                                                                                                                                     |                                |                              | P_trifoliata_00153_mRNA_13,1    |
| GF0046046 | 0                           | 0                         | 1                            | Hypothetical protein (1)                                         |                                                                                                                                                                                                                                                                                                                                                                    |                                                                                                                                                                                                                                         |                                |                              | P_trifoliata_00153_mRNA_12,1    |
| GF0046045 | 0                           | 0                         | 1                            | Hypothetical protein (1)                                         |                                                                                                                                                                                                                                                                                                                                                                    |                                                                                                                                                                                                                                         |                                |                              | P_trifoliata_00152_mRNA_6,1     |
| GF0046044 | 0                           | 0                         | 1                            | Hypothetical protein (1)                                         |                                                                                                                                                                                                                                                                                                                                                                    |                                                                                                                                                                                                                                         |                                |                              | P_trifoliata_00152_mRNA_4,1     |
| GF0046043 | 0                           | 0                         | 1                            | Hypothetical protein (1)                                         |                                                                                                                                                                                                                                                                                                                                                                    |                                                                                                                                                                                                                                         |                                |                              | P_trifoliata_00152_mRNA_35,1    |
| GF0046042 | 0                           | 0                         | 1                            | Hypothetical protein (1)                                         |                                                                                                                                                                                                                                                                                                                                                                    |                                                                                                                                                                                                                                         |                                |                              | P_trifoliata_00152_mRNA_3,1     |
| GF0046041 | 0                           | 0                         | 1                            | Hypothetical protein (1)                                         |                                                                                                                                                                                                                                                                                                                                                                    |                                                                                                                                                                                                                                         |                                |                              | P_trifoliata_00152_mRNA_28,1    |
| GF0046040 | 0                           | 0                         | 1                            | Hypothetical protein (1)                                         |                                                                                                                                                                                                                                                                                                                                                                    |                                                                                                                                                                                                                                         |                                |                              | P_trifoliata_00152_mRNA_27,1    |
| GF0046039 | 0                           | 0                         | 1                            | Hypothetical protein (1)                                         |                                                                                                                                                                                                                                                                                                                                                                    |                                                                                                                                                                                                                                         |                                |                              | P_trifoliata_00152_mRNA_26,1    |
| GF0046038 | 0                           | 0                         | 1                            | Hypothetical protein (1)                                         |                                                                                                                                                                                                                                                                                                                                                                    |                                                                                                                                                                                                                                         |                                |                              | P_trifoliata_00152_mRNA_21,1    |
| GF0046037 | 0                           | 0                         | 1                            | Hypothetical protein (1)                                         |                                                                                                                                                                                                                                                                                                                                                                    | Reverse transcriptase domain [IPR000477] (1)                                                                                                                                                                                            |                                |                              | P_trifoliata_00152_mRNA_20,1    |
| GF0046036 | 0                           | 0                         | 1                            | Hypothetical protein (1)                                         |                                                                                                                                                                                                                                                                                                                                                                    |                                                                                                                                                                                                                                         |                                |                              | P_trifoliata_00152_mRNA_2,1     |
| GF0046035 | 0                           | 0                         | 1                            | Hypothetical protein (1)                                         |                                                                                                                                                                                                                                                                                                                                                                    |                                                                                                                                                                                                                                         |                                |                              | P_trifoliata_00152_mRNA_17,1    |
| GF0046034 | 0                           | 0                         | 1                            | Hypothetical protein (1)                                         | integral component of membrane [GO:0016021 cellular_component] (1)                                                                                                                                                                                                                                                                                                 | Chloroplast envelope membrane protein, CcmA [IPR004282] (1); NOSC [IPR012976] (1); Nop domain [IPR002687] (1); NOPS, N-terminal [IPR012974] (1)                                                                                         |                                |                              | P_trifoliata_00152_mRNA_14,1    |
| GF0046033 | 0                           | 0                         | 1                            | Hypothetical protein (1)                                         |                                                                                                                                                                                                                                                                                                                                                                    |                                                                                                                                                                                                                                         |                                |                              | P_trifoliata_00152_mRNA_12,1    |
| GF0046032 | 0                           | 0                         | 1                            | Hypothetical protein (1)                                         |                                                                                                                                                                                                                                                                                                                                                                    |                                                                                                                                                                                                                                         |                                |                              | P_trifoliata_00152_mRNA_1,1     |
| GF0046031 | 0                           | 0                         | 1                            | mRNA decapping enzyme 1A, putative (1)                           | enzyme activator activity [GO:0008047 molecular_function] (1); positive regulation of catalytic activity [GO:0043085 biological_process] (1); deadenylation-dependent decapping of nuclear-transcribed mRNA [GO:0000290 biological_process] (1)                                                                                                                    | mRNA-decapping enzyme subunit 1 [IPR010334] (1); PH domain-like [IPR011993] (1)                                                                                                                                                         |                                |                              | P_trifoliata_00151_mRNA_8,1     |

| ID        | Num. in <i>C. celeratae</i> | Num. in <i>C. canthii</i> | Num. in <i>P. trifoliata</i> | Note                                                                     | GO                                                                                                                                                                                                                                                                                                                                                        | InterPro                                                                                                                                                                                                                                                                                                                  | Members in <i>C. celeratae</i> | Members in <i>C. canthii</i> | Members in <i>P. trifoliata</i> |
|-----------|-----------------------------|---------------------------|------------------------------|--------------------------------------------------------------------------|-----------------------------------------------------------------------------------------------------------------------------------------------------------------------------------------------------------------------------------------------------------------------------------------------------------------------------------------------------------|---------------------------------------------------------------------------------------------------------------------------------------------------------------------------------------------------------------------------------------------------------------------------------------------------------------------------|--------------------------------|------------------------------|---------------------------------|
| GF0046030 | 0                           | 0                         | 1                            | Non-symbiotic hemoglobin 1 (1)                                           | oxygen binding [GO:0019825<br>molecular_function (1); heme binding<br>[GO:0020037 molecular_function (1)                                                                                                                                                                                                                                                  | Globin/Prothoglobin [IPR012929] (1);<br>Globin-like [IPR009050] (1); Globin<br>[IPR000971] (1); Leghaemoglobin<br>[IPR01032] (1)                                                                                                                                                                                          | -                              | -                            | P_trifoliata_00151_mRNA_46.1    |
| GF0046029 | 0                           | 0                         | 1                            | Hypothetical protein (1)                                                 |                                                                                                                                                                                                                                                                                                                                                           |                                                                                                                                                                                                                                                                                                                           |                                |                              | P_trifoliata_00151_mRNA_45.1    |
| GF0046028 | 0                           | 0                         | 1                            | Hypothetical protein (1)                                                 | regulation of transcription, DNA-<br>templated [GO:0006355<br>biological_process (1)                                                                                                                                                                                                                                                                      | FHY3/FAR1 family [IPR011052] (1)                                                                                                                                                                                                                                                                                          | -                              | -                            | P_trifoliata_00151_mRNA_40.1    |
| GF0046027 | 0                           | 0                         | 1                            | Hypothetical protein (1)                                                 |                                                                                                                                                                                                                                                                                                                                                           |                                                                                                                                                                                                                                                                                                                           |                                |                              | P_trifoliata_00151_mRNA_28.1    |
| GF0046026 | 0                           | 0                         | 1                            | Hypothetical protein (1)                                                 | DNA binding [GO:0003677<br>molecular_function (1)                                                                                                                                                                                                                                                                                                         | Zinc finger, BED-type [IPR003656] (1);<br>hAT-like transposase, RNase-H fold<br>[IPR025525] (1)                                                                                                                                                                                                                           | -                              | -                            | P_trifoliata_00151_mRNA_22.1    |
| GF0046025 | 0                           | 0                         | 1                            | Hypothetical protein (1)                                                 |                                                                                                                                                                                                                                                                                                                                                           |                                                                                                                                                                                                                                                                                                                           |                                |                              | P_trifoliata_00151_mRNA_21.1    |
| GF0046024 | 0                           | 0                         | 1                            | Hypothetical protein (1)                                                 |                                                                                                                                                                                                                                                                                                                                                           |                                                                                                                                                                                                                                                                                                                           |                                |                              | P_trifoliata_00151_mRNA_20.1    |
| GF0046023 | 0                           | 0                         | 1                            | Hypothetical protein (1)                                                 |                                                                                                                                                                                                                                                                                                                                                           |                                                                                                                                                                                                                                                                                                                           |                                |                              | P_trifoliata_00151_mRNA_17.1    |
| GF0046022 | 0                           | 0                         | 1                            | Glycosyl hydrolase family protein with<br>chitinase insertion domain (1) | chain catabolic process [GO:0006032<br>biological_process (1); hydrolase<br>activity, hydrolyzing O-glycosyl<br>compounds [GO:0004553<br>molecular_function (1); chitinase<br>activity [GO:0004568<br>molecular_function (1); carbohydrate<br>metabolic process [GO:0005975<br>biological_process (1)                                                     | Chitinase II [IPR011583] (1); Glycoside<br>hydrolase, catalytic domain [IPR013781]<br>(1); Glycoside hydrolase superfamily<br>[IPR017853] (1); Glycoside hydrolase<br>family 18, catalytic domain [IPR001223]<br>(1)                                                                                                      | -                              | -                            | P_trifoliata_00151_mRNA_14.1    |
| GF0046021 | 0                           | 0                         | 1                            | Sulfotransferase (1)                                                     | protein binding [GO:0005515<br>molecular_function (1)                                                                                                                                                                                                                                                                                                     | Leucine-rich repeat domain, L domain-<br>like [IPR032675] (1); Leucine-rich repeat<br>[IPR001611] (1)                                                                                                                                                                                                                     | -                              | -                            | P_trifoliata_00151_mRNA_13.1    |
| GF0046020 | 0                           | 0                         | 1                            | mRNA decapping enzyme 1A, putative<br>(1)                                | positive regulation of catalytic activity<br>[GO:0000855 biological_process (1);<br>deadenylation-dependent decapping of<br>nuclear-transcribed mRNA [GO:0000290<br>biological_process (1); enzyme activator<br>activity [GO:0000847<br>molecular_function (1)                                                                                            | mRNA-decapping enzyme subunit 1<br>[IPR010334] (1); PH domain-like<br>[IPR011993] (1)                                                                                                                                                                                                                                     | -                              | -                            | P_trifoliata_00151_mRNA_12.1    |
| GF0046019 | 0                           | 0                         | 1                            | LRR receptor-like serine/threonine-<br>protein kinase GSO1 (1)           | protein binding [GO:0005515<br>molecular_function (1)                                                                                                                                                                                                                                                                                                     | Leucine-rich repeat [IPR001611] (1);<br>Leucine-rich repeat domain, L domain-<br>like [IPR032675] (1); Leucine-rich<br>repeat, typical subtype [IPR003591] (1)                                                                                                                                                            | -                              | -                            | P_trifoliata_00151_mRNA_10.1    |
| GF0046018 | 0                           | 0                         | 1                            | Hypothetical protein (1)                                                 | protein binding [GO:0005515<br>molecular_function (1)                                                                                                                                                                                                                                                                                                     | Leucine-rich repeat domain, L domain-<br>like [IPR032675] (1); Leucine-rich repeat<br>[IPR001611] (1)                                                                                                                                                                                                                     | -                              | -                            | P_trifoliata_00151_mRNA_1.1     |
| GF0046017 | 0                           | 0                         | 1                            | Hypothetical protein (1)                                                 |                                                                                                                                                                                                                                                                                                                                                           |                                                                                                                                                                                                                                                                                                                           |                                |                              | P_trifoliata_00150_mRNA_54.1    |
| GF0046016 | 0                           | 0                         | 1                            | Hypothetical protein (1)                                                 |                                                                                                                                                                                                                                                                                                                                                           |                                                                                                                                                                                                                                                                                                                           |                                |                              | P_trifoliata_00150_mRNA_53.1    |
| GF0046015 | 0                           | 0                         | 1                            | Hypothetical protein (1)                                                 |                                                                                                                                                                                                                                                                                                                                                           |                                                                                                                                                                                                                                                                                                                           |                                |                              | P_trifoliata_00150_mRNA_47.1    |
| GF0046014 | 0                           | 0                         | 1                            | Hypothetical protein (1)                                                 |                                                                                                                                                                                                                                                                                                                                                           |                                                                                                                                                                                                                                                                                                                           |                                |                              | P_trifoliata_00150_mRNA_45.1    |
| GF0046013 | 0                           | 0                         | 1                            | Hypothetical protein (1)                                                 |                                                                                                                                                                                                                                                                                                                                                           |                                                                                                                                                                                                                                                                                                                           |                                |                              | P_trifoliata_00150_mRNA_34.1    |
| GF0046012 | 0                           | 0                         | 1                            | Hypothetical protein (1)                                                 |                                                                                                                                                                                                                                                                                                                                                           |                                                                                                                                                                                                                                                                                                                           |                                |                              | P_trifoliata_00150_mRNA_33.1    |
| GF0046011 | 0                           | 0                         | 1                            | Hypothetical protein (1)                                                 |                                                                                                                                                                                                                                                                                                                                                           |                                                                                                                                                                                                                                                                                                                           |                                |                              | P_trifoliata_00150_mRNA_31.1    |
| GF0046010 | 0                           | 0                         | 1                            | PAP fibrillin (1)                                                        |                                                                                                                                                                                                                                                                                                                                                           | Plastid lipid-associated protein/fibrillin<br>conserved domain [IPR006843] (1)                                                                                                                                                                                                                                            | -                              | -                            | P_trifoliata_00150_mRNA_28.1    |
| GF0046009 | 0                           | 0                         | 1                            | Hypothetical protein (1)                                                 |                                                                                                                                                                                                                                                                                                                                                           |                                                                                                                                                                                                                                                                                                                           |                                |                              | P_trifoliata_00150_mRNA_25.1    |
| GF0046008 | 0                           | 0                         | 1                            | Hypothetical protein (1)                                                 |                                                                                                                                                                                                                                                                                                                                                           |                                                                                                                                                                                                                                                                                                                           |                                |                              | P_trifoliata_00150_mRNA_21.1    |
| GF0046007 | 0                           | 0                         | 1                            | Hypothetical protein (1)                                                 |                                                                                                                                                                                                                                                                                                                                                           |                                                                                                                                                                                                                                                                                                                           |                                |                              | P_trifoliata_00150_mRNA_17.1    |
| GF0046006 | 0                           | 0                         | 1                            | Hypothetical protein (1)                                                 |                                                                                                                                                                                                                                                                                                                                                           |                                                                                                                                                                                                                                                                                                                           |                                |                              | P_trifoliata_00150_mRNA_15.1    |
| GF0046005 | 0                           | 0                         | 1                            | Hypothetical protein (1)                                                 |                                                                                                                                                                                                                                                                                                                                                           |                                                                                                                                                                                                                                                                                                                           |                                |                              | P_trifoliata_00150_mRNA_1.1     |
| GF0046004 | 0                           | 0                         | 1                            | Hypothetical protein (1)                                                 |                                                                                                                                                                                                                                                                                                                                                           |                                                                                                                                                                                                                                                                                                                           |                                |                              | P_trifoliata_00149_mRNA_8.1     |
| GF0046003 | 0                           | 0                         | 1                            | Hypothetical protein (1)                                                 |                                                                                                                                                                                                                                                                                                                                                           |                                                                                                                                                                                                                                                                                                                           |                                |                              | P_trifoliata_00149_mRNA_65.1    |
| GF0046002 | 0                           | 0                         | 1                            | Hypothetical protein (1)                                                 |                                                                                                                                                                                                                                                                                                                                                           |                                                                                                                                                                                                                                                                                                                           |                                |                              | P_trifoliata_00149_mRNA_60.1    |
| GF0046001 | 0                           | 0                         | 1                            | Hypothetical protein (1)                                                 |                                                                                                                                                                                                                                                                                                                                                           |                                                                                                                                                                                                                                                                                                                           |                                |                              | P_trifoliata_00149_mRNA_59.1    |
| GF0046000 | 0                           | 0                         | 1                            | Type II peroxidoxin (1)                                                  | oxidoreductase activity [GO:0016491<br>molecular_function (1)                                                                                                                                                                                                                                                                                             | Redoxin [IPR013740] (1); Thioredoxin-<br>like fold [IPR012336] (1)                                                                                                                                                                                                                                                        | -                              | -                            | P_trifoliata_00149_mRNA_35.1    |
| GF0045999 | 0                           | 0                         | 1                            | Hypothetical protein (1)                                                 | copper ion binding [GO:0005507<br>molecular_function (1); oxidoreductase<br>activity [GO:0016491<br>molecular_function (1); oxidation-<br>reduction process [GO:0055114<br>biological_process (1)                                                                                                                                                         | Cupredoxin [IPR008972] (1);<br>Multicopper oxidase, type 1 [IPR001117]<br>(1); Multicopper oxidase, type 3<br>[IPR011707] (1)                                                                                                                                                                                             | -                              | -                            | P_trifoliata_00149_mRNA_25.1    |
| GF0045998 | 0                           | 0                         | 1                            | Hypothetical protein (1)                                                 |                                                                                                                                                                                                                                                                                                                                                           |                                                                                                                                                                                                                                                                                                                           |                                |                              | P_trifoliata_00149_mRNA_22.1    |
| GF0045996 | 0                           | 0                         | 1                            | G10 family protein (1)                                                   | nucleus [GO:0005634<br>cellular_component (1)                                                                                                                                                                                                                                                                                                             | G10 protein [IPR001748] (1);<br>BUD3/G10-related, conserved site<br>[IPR018230] (1)                                                                                                                                                                                                                                       | -                              | -                            | P_trifoliata_00148_mRNA_9.1     |
| GF0045995 | 0                           | 0                         | 1                            | Hypothetical protein (1)                                                 |                                                                                                                                                                                                                                                                                                                                                           |                                                                                                                                                                                                                                                                                                                           |                                |                              | P_trifoliata_00148_mRNA_74.1    |
| GF0045994 | 0                           | 0                         | 1                            | CDNA clone:J02302E20, full insert<br>sequence (1)                        |                                                                                                                                                                                                                                                                                                                                                           |                                                                                                                                                                                                                                                                                                                           |                                |                              | P_trifoliata_00148_mRNA_59.1    |
| GF0045993 | 0                           | 0                         | 1                            | Hypothetical protein (1)                                                 |                                                                                                                                                                                                                                                                                                                                                           |                                                                                                                                                                                                                                                                                                                           |                                |                              | P_trifoliata_00148_mRNA_57.1    |
| GF0045992 | 0                           | 0                         | 1                            | ADP-ribosylation factor 2 (1)                                            | small GTPase mediated signal<br>transduction [GO:0007264<br>biological_process (1); GTP binding<br>[GO:0005255 molecular_function (1);<br>intracellular [GO:0008622<br>cellular_component (1)                                                                                                                                                             | Small GTP-binding protein domain<br>[IPR005225] (1); P-loop containing<br>nucleoside triphosphate hydrolase<br>[IPR027471] (1); Small GTPase<br>superfamily, ARF type [IPR024156] (1);<br>Small GTPase superfamily, ARF/SAR<br>type [IPR006689] (1)                                                                       | -                              | -                            | P_trifoliata_00148_mRNA_46.1    |
| GF0045991 | 0                           | 0                         | 1                            | Transferring glycosyl group transferase<br>(1)                           |                                                                                                                                                                                                                                                                                                                                                           |                                                                                                                                                                                                                                                                                                                           |                                |                              | P_trifoliata_00148_mRNA_44.1    |
| GF0045990 | 0                           | 0                         | 1                            | Hypothetical protein (1)                                                 |                                                                                                                                                                                                                                                                                                                                                           |                                                                                                                                                                                                                                                                                                                           |                                |                              | P_trifoliata_00148_mRNA_42.1    |
| GF0045989 | 0                           | 0                         | 1                            | Hypothetical protein (1)                                                 | hydrolase activity, hydrolyzing O-<br>glycosyl compounds [GO:0004553<br>molecular_function (1); carbohydrate<br>metabolic process [GO:0005975<br>biological_process (1)                                                                                                                                                                                   | Glycoside hydrolase family 16<br>[IPR000757] (1); Concanavalin A-like<br>lectin/glucanase domain [IPR013320] (1)                                                                                                                                                                                                          | -                              | -                            | P_trifoliata_00148_mRNA_30.1    |
| GF0045988 | 0                           | 0                         | 1                            | Hypothetical protein (1)                                                 |                                                                                                                                                                                                                                                                                                                                                           |                                                                                                                                                                                                                                                                                                                           |                                |                              | P_trifoliata_00148_mRNA_29.1    |
| GF0045987 | 0                           | 0                         | 1                            | Hypothetical protein (1)                                                 |                                                                                                                                                                                                                                                                                                                                                           |                                                                                                                                                                                                                                                                                                                           |                                |                              | P_trifoliata_00148_mRNA_27.1    |
| GF0045986 | 0                           | 0                         | 1                            | Xyloglucan<br>1-endotransglycosylase/hydrolase protein<br>22 (1)         | hydrolase activity, hydrolyzing O-<br>glycosyl compounds [GO:0004553<br>molecular_function (1); carbohydrate<br>metabolic process [GO:0005975<br>biological_process (1)                                                                                                                                                                                   | Concanavalin A-like lectin/glucanase<br>domain [IPR010713] (1); Glycoside<br>hydrolase, family 16, active site<br>[IPR008263] (1); Glycoside hydrolase<br>family 16 [IPR000757] (1)                                                                                                                                       | -                              | -                            | P_trifoliata_00148_mRNA_25.1    |
| GF0045985 | 0                           | 0                         | 1                            | Hypothetical protein (1)                                                 | cellular glucan metabolic process<br>[GO:0006073 biological_process (1);<br>apoplast [GO:0048046<br>cellular_component (1); carbohydrate<br>metabolic process [GO:0005975<br>biological_process (1); cell wall<br>[GO:0005618 cellular_component (1)];<br>hydrolase activity, hydrolyzing O-<br>glycosyl compounds [GO:0004553<br>molecular_function (1); | Xyloglucan endo-transglycosylase, C-<br>terminal [IPR010713] (1); Nucleotide-<br>diphosphate-sugar transferase<br>[IPR005069] (1); Glycoside hydrolase<br>family 16 [IPR000757] (1);<br>Concanavalin A-like lectin/glucanase<br>domain [IPR013320] (1); Glycoside<br>hydrolase, family 16, active site<br>[IPR008263] (1) | -                              | -                            | P_trifoliata_00148_mRNA_14.1    |
| GF0045984 | 0                           | 0                         | 1                            | Ankyrin repeat plant-like protein (1)                                    | protein binding [GO:0005515<br>molecular_function (1)                                                                                                                                                                                                                                                                                                     | Ankyrin repeat [IPR002101] (1); Ankyrin<br>repeat-containing domain [IPR020683]<br>(1); PG4 domain [IPR029961] (1)                                                                                                                                                                                                        | -                              | -                            | P_trifoliata_00147_mRNA_7.1     |
| GF0045983 | 0                           | 0                         | 1                            | Hypothetical protein (1)                                                 |                                                                                                                                                                                                                                                                                                                                                           |                                                                                                                                                                                                                                                                                                                           |                                |                              | P_trifoliata_00147_mRNA_5.1     |
| GF0045982 | 0                           | 0                         | 1                            | Hypothetical protein (1)                                                 |                                                                                                                                                                                                                                                                                                                                                           |                                                                                                                                                                                                                                                                                                                           |                                |                              | P_trifoliata_00147_mRNA_35.1    |
| GF0045981 | 0                           | 0                         | 1                            | Hypothetical protein (1)                                                 | DNA binding [GO:0003677<br>molecular_function (1)                                                                                                                                                                                                                                                                                                         | hAT-like transposase, RNase-H fold<br>[IPR025525] (1); Zinc finger, BED-type<br>[IPR03656] (1)                                                                                                                                                                                                                            | -                              | -                            | P_trifoliata_00147_mRNA_32.1    |
| GF0045980 | 0                           | 0                         | 1                            | CACTA transposable element (1)                                           |                                                                                                                                                                                                                                                                                                                                                           | Transposon, En/Spm-like [IPR004242]<br>(1)                                                                                                                                                                                                                                                                                | -                              | -                            | P_trifoliata_00147_mRNA_31.1    |
| GF0045979 | 0                           | 0                         | 1                            | Hypothetical protein (1)                                                 |                                                                                                                                                                                                                                                                                                                                                           |                                                                                                                                                                                                                                                                                                                           |                                |                              | P_trifoliata_00147_mRNA_29.1    |
| GF0045978 | 0                           | 0                         | 1                            | Hypothetical protein (1)                                                 |                                                                                                                                                                                                                                                                                                                                                           |                                                                                                                                                                                                                                                                                                                           |                                |                              | P_trifoliata_00147_mRNA_28.1    |
| GF0045977 | 0                           | 0                         | 1                            | Hypothetical protein (1)                                                 |                                                                                                                                                                                                                                                                                                                                                           |                                                                                                                                                                                                                                                                                                                           |                                |                              | P_trifoliata_00147_mRNA_27.1    |
| GF0045976 | 0                           | 0                         | 1                            | Hypothetical protein (1)                                                 |                                                                                                                                                                                                                                                                                                                                                           |                                                                                                                                                                                                                                                                                                                           |                                |                              | P_trifoliata_00147_mRNA_26.1    |
| GF0045975 | 0                           | 0                         | 1                            | Hypothetical protein (1)                                                 |                                                                                                                                                                                                                                                                                                                                                           |                                                                                                                                                                                                                                                                                                                           |                                |                              | P_trifoliata_00147_mRNA_23.1    |
| GF0045974 | 0                           | 0                         | 1                            | Hypothetical protein (1)                                                 |                                                                                                                                                                                                                                                                                                                                                           |                                                                                                                                                                                                                                                                                                                           |                                |                              | P_trifoliata_00147_mRNA_19.1    |
| GF0045973 | 0                           | 0                         | 1                            | Hypothetical protein (1)                                                 |                                                                                                                                                                                                                                                                                                                                                           |                                                                                                                                                                                                                                                                                                                           |                                |                              | P_trifoliata_00147_mRNA_18.1    |
| GF0045972 | 0                           | 0                         | 1                            | Hypothetical protein (1)                                                 | ATP binding [GO:0005524<br>molecular_function (1)                                                                                                                                                                                                                                                                                                         | P-loop containing nucleoside<br>triphosphate hydrolase [IPR027417] (1);<br>ATPase, AAA-type, core [IPR003959]<br>(1)                                                                                                                                                                                                      | -                              | -                            | P_trifoliata_00147_mRNA_17.1    |
| GF0045971 | 0                           | 0                         | 1                            | Hypothetical protein (1)                                                 |                                                                                                                                                                                                                                                                                                                                                           |                                                                                                                                                                                                                                                                                                                           |                                |                              | P_trifoliata_00147_mRNA_15.1    |
| GF0045970 | 0                           | 0                         | 1                            | Hypothetical protein (1)                                                 |                                                                                                                                                                                                                                                                                                                                                           |                                                                                                                                                                                                                                                                                                                           |                                |                              | P_trifoliata_00147_mRNA_11.1    |
| GF0045969 | 0                           | 0                         | 1                            | Hypothetical protein (1)                                                 | ADP binding [GO:0043531<br>molecular_function (1)                                                                                                                                                                                                                                                                                                         | Peptidocysteine repeat [IPR002885] (1)-<br>NB-ARC [IPR002182] (1); P-loop<br>containing nucleoside triphosphate<br>hydrolase [IPR027417] (1)                                                                                                                                                                              | -                              | -                            | P_trifoliata_00147_mRNA_1.1     |
| GF0045968 | 0                           | 0                         | 1                            | Hypothetical protein (1)                                                 |                                                                                                                                                                                                                                                                                                                                                           |                                                                                                                                                                                                                                                                                                                           |                                |                              | P_trifoliata_00146_mRNA_9.1     |
| GF0045967 | 0                           | 0                         | 1                            | Hypothetical protein (1)                                                 |                                                                                                                                                                                                                                                                                                                                                           |                                                                                                                                                                                                                                                                                                                           |                                |                              | P_trifoliata_00146_mRNA_62.1    |
| GF0045966 | 0                           | 0                         | 1                            | Hypothetical protein (1)                                                 |                                                                                                                                                                                                                                                                                                                                                           |                                                                                                                                                                                                                                                                                                                           |                                |                              | P_trifoliata_00146_mRNA_57.1    |
| GF0045965 | 0                           | 0                         | 1                            | Hypothetical protein (1)                                                 |                                                                                                                                                                                                                                                                                                                                                           |                                                                                                                                                                                                                                                                                                                           |                                |                              | P_trifoliata_00146_mRNA_55.1    |
| GF0045964 | 0                           | 0                         | 1                            | Hypothetical protein (1)                                                 |                                                                                                                                                                                                                                                                                                                                                           |                                                                                                                                                                                                                                                                                                                           |                                |                              | P_trifoliata_00146_mRNA_50.1    |
| GF0045963 | 0                           | 0                         | 1                            | GTase Der (1)                                                            |                                                                                                                                                                                                                                                                                                                                                           | Domain of unknown function DUF642<br>[IPR006946] (1)                                                                                                                                                                                                                                                                      | -                              | -                            | P_trifoliata_00146_mRNA_43.1    |

| ID        | Num. in <i>C. clementiae</i> | Num. in <i>C. canihii</i> | Num. in <i>P. trifoliata</i> | Note                                      | GO                                                                                                                                                                                                                                                                                                                                                                                                                                                                         | InterPro                                                                                                                                                                                                                                                                                          | Members in <i>C. clementiae</i> | Members in <i>C. canihii</i> | Members in <i>P. trifoliata</i> |
|-----------|------------------------------|---------------------------|------------------------------|-------------------------------------------|----------------------------------------------------------------------------------------------------------------------------------------------------------------------------------------------------------------------------------------------------------------------------------------------------------------------------------------------------------------------------------------------------------------------------------------------------------------------------|---------------------------------------------------------------------------------------------------------------------------------------------------------------------------------------------------------------------------------------------------------------------------------------------------|---------------------------------|------------------------------|---------------------------------|
| GF0045962 | 0                            | 0                         | 0                            | 1 Hypothetical protein (1)                |                                                                                                                                                                                                                                                                                                                                                                                                                                                                            |                                                                                                                                                                                                                                                                                                   |                                 |                              | P_trifoliata_00146_mRNA_41.1    |
| GF0045961 | 0                            | 0                         | 0                            | 1 Hypothetical protein (1)                |                                                                                                                                                                                                                                                                                                                                                                                                                                                                            |                                                                                                                                                                                                                                                                                                   |                                 |                              | P_trifoliata_00146_mRNA_26.1    |
| GF0045960 | 0                            | 0                         | 0                            | 1 Hypothetical protein (1)                |                                                                                                                                                                                                                                                                                                                                                                                                                                                                            |                                                                                                                                                                                                                                                                                                   |                                 |                              | P_trifoliata_00146_mRNA_21.1    |
| GF0045959 | 0                            | 0                         | 0                            | 1 Hypothetical protein (1)                |                                                                                                                                                                                                                                                                                                                                                                                                                                                                            |                                                                                                                                                                                                                                                                                                   |                                 |                              | P_trifoliata_00146_mRNA_19.1    |
| GF0045958 | 0                            | 0                         | 0                            | 1 Hypothetical protein (1)                |                                                                                                                                                                                                                                                                                                                                                                                                                                                                            |                                                                                                                                                                                                                                                                                                   |                                 |                              | P_trifoliata_00146_mRNA_14.1    |
| GF0045957 | 0                            | 0                         | 0                            | 1 Hypothetical protein (1)                |                                                                                                                                                                                                                                                                                                                                                                                                                                                                            |                                                                                                                                                                                                                                                                                                   |                                 |                              | P_trifoliata_00146_mRNA_11.1    |
| GF0045956 | 0                            | 0                         | 0                            | 1 Hypothetical protein (1)                |                                                                                                                                                                                                                                                                                                                                                                                                                                                                            |                                                                                                                                                                                                                                                                                                   |                                 |                              | P_trifoliata_00145_mRNA_9.1     |
| GF0045955 | 0                            | 0                         | 0                            | 1 Hypothetical protein (1)                |                                                                                                                                                                                                                                                                                                                                                                                                                                                                            |                                                                                                                                                                                                                                                                                                   |                                 |                              | P_trifoliata_00145_mRNA_69.1    |
| GF0045954 | 0                            | 0                         | 0                            | 1 Hypothetical protein (1)                |                                                                                                                                                                                                                                                                                                                                                                                                                                                                            | GAG-pre-integrase domain [IPR025724] (1)                                                                                                                                                                                                                                                          |                                 |                              | P_trifoliata_00145_mRNA_68.1    |
| GF0045953 | 0                            | 0                         | 0                            | 1 Hypothetical protein (1)                |                                                                                                                                                                                                                                                                                                                                                                                                                                                                            |                                                                                                                                                                                                                                                                                                   |                                 |                              | P_trifoliata_00145_mRNA_67.1    |
| GF0045952 | 0                            | 0                         | 0                            | 1 Hypothetical protein (1)                |                                                                                                                                                                                                                                                                                                                                                                                                                                                                            |                                                                                                                                                                                                                                                                                                   |                                 |                              | P_trifoliata_00145_mRNA_64.1    |
| GF0045951 | 0                            | 0                         | 0                            | 1 Hypothetical protein (1)                |                                                                                                                                                                                                                                                                                                                                                                                                                                                                            |                                                                                                                                                                                                                                                                                                   |                                 |                              | P_trifoliata_00145_mRNA_61.1    |
| GF0045950 | 0                            | 0                         | 0                            | 1 Hypothetical protein (1)                |                                                                                                                                                                                                                                                                                                                                                                                                                                                                            |                                                                                                                                                                                                                                                                                                   |                                 |                              | P_trifoliata_00145_mRNA_60.1    |
| GF0045949 | 0                            | 0                         | 0                            | 1 Hypothetical protein (1)                |                                                                                                                                                                                                                                                                                                                                                                                                                                                                            |                                                                                                                                                                                                                                                                                                   |                                 |                              | P_trifoliata_00145_mRNA_59.1    |
| GF0045948 | 0                            | 0                         | 0                            | 1 Hypothetical protein (1)                |                                                                                                                                                                                                                                                                                                                                                                                                                                                                            |                                                                                                                                                                                                                                                                                                   |                                 |                              | P_trifoliata_00145_mRNA_51.1    |
| GF0045947 | 0                            | 0                         | 0                            | 1 Receptor-like kinase plam (1)           | protein kinase activity [GO:0004672 molecular_function] (1); protein phosphorylation [GO:0006468 biological_process] (1); ATP binding [GO:0005524 molecular_function] (1)                                                                                                                                                                                                                                                                                                  | Protein kinase domain [IPR000719] (1); Protein kinase-like domain [IPR011009] (1); Protein kinase, ATP binding site [IPR017441] (1); Serine/threonine-protein kinase, active site [IPR008271] (1); Serine/threonine/tyrosine-protein kinase catalytic domain [IPR001245] (1)                      |                                 |                              | P_trifoliata_00145_mRNA_35.1    |
| GF0045946 | 0                            | 0                         | 0                            | 1 Tubulin alpha chain (1)                 | GTPase activity [GO:0003924 molecular_function] (1); microtubule-based process [GO:0007017 biological_process] (1); structural constituent of cytoskeleton [GO:0005206 molecular_function] (1); microtubule [GO:0005874 cellular_component] (1); GTP binding [GO:0005525 molecular_function] (1)                                                                                                                                                                           | Alpha tubulin [IPR02421] (1); Tubulin/FaZ_2-layer sandwich domain [IPR018316] (1); Tubulin [IPR000217] (1); Tubulin/FaZ_C-terminal [IPR008280] (1); Beta tubulin, autoregulation binding site [IPR013838] (1); Tubulin, conserved site [IPR017975] (1); Tubulin/FaZ_GTPase domain [IPR003008] (1) |                                 |                              | P_trifoliata_00145_mRNA_15.1    |
| GF0045945 | 0                            | 0                         | 0                            | 1 Hypothetical protein (1)                |                                                                                                                                                                                                                                                                                                                                                                                                                                                                            |                                                                                                                                                                                                                                                                                                   |                                 |                              | P_trifoliata_00145_mRNA_1.1     |
| GF0045944 | 0                            | 0                         | 0                            | 1 Hypothetical protein (1)                |                                                                                                                                                                                                                                                                                                                                                                                                                                                                            |                                                                                                                                                                                                                                                                                                   |                                 |                              | P_trifoliata_00144_mRNA_8.1     |
| GF0045943 | 0                            | 0                         | 0                            | 1 Hypothetical protein (1)                |                                                                                                                                                                                                                                                                                                                                                                                                                                                                            |                                                                                                                                                                                                                                                                                                   |                                 |                              | P_trifoliata_00144_mRNA_7.1     |
| GF0045942 | 0                            | 0                         | 0                            | 1 Hypothetical protein (1)                |                                                                                                                                                                                                                                                                                                                                                                                                                                                                            |                                                                                                                                                                                                                                                                                                   |                                 |                              | P_trifoliata_00144_mRNA_59.1    |
| GF0045941 | 0                            | 0                         | 0                            | 1 Hypothetical protein (1)                |                                                                                                                                                                                                                                                                                                                                                                                                                                                                            |                                                                                                                                                                                                                                                                                                   |                                 |                              | P_trifoliata_00144_mRNA_57.1    |
| GF0045940 | 0                            | 0                         | 0                            | 1 Hypothetical protein (1)                |                                                                                                                                                                                                                                                                                                                                                                                                                                                                            |                                                                                                                                                                                                                                                                                                   |                                 |                              | P_trifoliata_00144_mRNA_56.1    |
| GF0045939 | 0                            | 0                         | 0                            | 1 Hypothetical protein (1)                |                                                                                                                                                                                                                                                                                                                                                                                                                                                                            | Domain of unknown function DUF4283 [IPR025558] (1)                                                                                                                                                                                                                                                |                                 |                              | P_trifoliata_00144_mRNA_5.1     |
| GF0045938 | 0                            | 0                         | 0                            | 1 Hypothetical protein (1)                | proteolysis [GO:0006508 biological_process] (1); serine-type peptidase activity [GO:0008236 molecular_function] (1)                                                                                                                                                                                                                                                                                                                                                        | Peptidase S28 [IPR008758] (1); Alpha/Beta hydrolase fold [IPR029058] (1)                                                                                                                                                                                                                          |                                 |                              | P_trifoliata_00144_mRNA_49.1    |
| GF0045937 | 0                            | 0                         | 0                            | 1 Hypothetical protein (1)                |                                                                                                                                                                                                                                                                                                                                                                                                                                                                            |                                                                                                                                                                                                                                                                                                   |                                 |                              | P_trifoliata_00144_mRNA_48.1    |
| GF0045936 | 0                            | 0                         | 0                            | 1 Hypothetical protein (1)                |                                                                                                                                                                                                                                                                                                                                                                                                                                                                            |                                                                                                                                                                                                                                                                                                   |                                 |                              | P_trifoliata_00144_mRNA_42.1    |
| GF0045935 | 0                            | 0                         | 0                            | 1 Hypothetical protein (1)                |                                                                                                                                                                                                                                                                                                                                                                                                                                                                            |                                                                                                                                                                                                                                                                                                   |                                 |                              | P_trifoliata_00144_mRNA_4.1     |
| GF0045934 | 0                            | 0                         | 0                            | 1 Hypothetical protein (1)                |                                                                                                                                                                                                                                                                                                                                                                                                                                                                            |                                                                                                                                                                                                                                                                                                   |                                 |                              | P_trifoliata_00144_mRNA_37.1    |
| GF0045933 | 0                            | 0                         | 0                            | 1 Hypothetical protein (1)                | transmembrane transport [GO:005085 biological_process] (1)                                                                                                                                                                                                                                                                                                                                                                                                                 | Oligopeptide transporter; OPT superfamily [IPR004813] (1)                                                                                                                                                                                                                                         |                                 |                              | P_trifoliata_00144_mRNA_30.1    |
| GF0045932 | 0                            | 0                         | 0                            | 1 Hypothetical protein (1)                |                                                                                                                                                                                                                                                                                                                                                                                                                                                                            | Endonuclease/exonuclease/phosphatase [IPR005135] (1)                                                                                                                                                                                                                                              |                                 |                              | P_trifoliata_00144_mRNA_3.1     |
| GF0045931 | 0                            | 0                         | 0                            | 1 Hypothetical protein (1)                |                                                                                                                                                                                                                                                                                                                                                                                                                                                                            | Reverse transcriptase zinc-binding domain [IPR029660] (1)                                                                                                                                                                                                                                         |                                 |                              | P_trifoliata_00144_mRNA_28.1    |
| GF0045930 | 0                            | 0                         | 0                            | 1 Hypothetical protein (1)                | ATP binding [GO:0005524 molecular_function] (1)                                                                                                                                                                                                                                                                                                                                                                                                                            | Protein kinase, ATP binding site [IPR017441] (1); Protein kinase-like domain [IPR011009] (1)                                                                                                                                                                                                      |                                 |                              | P_trifoliata_00144_mRNA_26.1    |
| GF0045929 | 0                            | 0                         | 0                            | 1 Hypothetical protein (1)                |                                                                                                                                                                                                                                                                                                                                                                                                                                                                            |                                                                                                                                                                                                                                                                                                   |                                 |                              | P_trifoliata_00144_mRNA_22.1    |
| GF0045928 | 0                            | 0                         | 0                            | 1 Hypothetical protein (1)                |                                                                                                                                                                                                                                                                                                                                                                                                                                                                            |                                                                                                                                                                                                                                                                                                   |                                 |                              | P_trifoliata_00144_mRNA_20.1    |
| GF0045927 | 0                            | 0                         | 0                            | 1 Hypothetical protein (1)                |                                                                                                                                                                                                                                                                                                                                                                                                                                                                            |                                                                                                                                                                                                                                                                                                   |                                 |                              | P_trifoliata_00144_mRNA_2.1     |
| GF0045926 | 0                            | 0                         | 0                            | 1 Hypothetical protein (1)                |                                                                                                                                                                                                                                                                                                                                                                                                                                                                            |                                                                                                                                                                                                                                                                                                   |                                 |                              | P_trifoliata_00144_mRNA_14.1    |
| GF0045925 | 0                            | 0                         | 0                            | 1 Hypothetical protein (1)                |                                                                                                                                                                                                                                                                                                                                                                                                                                                                            |                                                                                                                                                                                                                                                                                                   |                                 |                              | P_trifoliata_00144_mRNA_12.1    |
| GF0045924 | 0                            | 0                         | 0                            | 1 Hypothetical protein (1)                |                                                                                                                                                                                                                                                                                                                                                                                                                                                                            |                                                                                                                                                                                                                                                                                                   |                                 |                              | P_trifoliata_00143_mRNA_9.1     |
| GF0045923 | 0                            | 0                         | 0                            | 1 Hypothetical protein (1)                |                                                                                                                                                                                                                                                                                                                                                                                                                                                                            |                                                                                                                                                                                                                                                                                                   |                                 |                              | P_trifoliata_00143_mRNA_58.1    |
| GF0045922 | 0                            | 0                         | 0                            | 1 Amino acid permease family protein (1)  | binding [GO:0005488 molecular_function] (1); amino acid transmembrane transporter activity [GO:0015171 molecular_function] (1); signal transduction [GO:0007165 biological_process] (1); membrane [GO:0016020 cellular_component] (1); protein phosphatase type 2A regulator activity [GO:0008060 molecular_function] (1); protein phosphatase type 2A complex [GO:0000159 cellular_component] (1); amino acid transmembrane transport [GO:0003333 biological_process] (1) | Protein phosphatase 2A, regulatory B subunit, B56 [IPR002554] (1); Aramidillo-type fold [IPR016024] (1); Amino acid/polyamine transporter I [IPR002293] (1)                                                                                                                                       |                                 |                              | P_trifoliata_00143_mRNA_54.1    |
| GF0045921 | 0                            | 0                         | 0                            | 1 Hypothetical protein (1)                |                                                                                                                                                                                                                                                                                                                                                                                                                                                                            | Reverse transcriptase, RNA-dependent DNA polymerase [IPR013105] (1)                                                                                                                                                                                                                               |                                 |                              | P_trifoliata_00143_mRNA_5.1     |
| GF0045920 | 0                            | 0                         | 0                            | 1 Hypothetical protein (1)                | microtubule cytoskeleton organization [GO:0000226 biological_process] (1); spindle pole [GO:0000922 cellular_component] (1); microtubule organizing center [GO:0005815 cellular_component] (1); positive regulation of microtubule nucleation [GO:0090063 biological_process] (1)                                                                                                                                                                                          | Gamma-tubulin complex component [IPR007259] (1)                                                                                                                                                                                                                                                   |                                 |                              | P_trifoliata_00143_mRNA_48.1    |
| GF0045919 | 0                            | 0                         | 0                            | 1 Hypothetical protein (1)                |                                                                                                                                                                                                                                                                                                                                                                                                                                                                            |                                                                                                                                                                                                                                                                                                   |                                 |                              | P_trifoliata_00143_mRNA_33.1    |
| GF0045918 | 0                            | 0                         | 0                            | 1 Hypothetical protein (1)                |                                                                                                                                                                                                                                                                                                                                                                                                                                                                            |                                                                                                                                                                                                                                                                                                   |                                 |                              | P_trifoliata_00143_mRNA_25.1    |
| GF0045917 | 0                            | 0                         | 0                            | 1 Hypothetical protein (1)                |                                                                                                                                                                                                                                                                                                                                                                                                                                                                            |                                                                                                                                                                                                                                                                                                   |                                 |                              | P_trifoliata_00143_mRNA_11.1    |
| GF0045916 | 0                            | 0                         | 0                            | 1 Hypothetical protein (1)                |                                                                                                                                                                                                                                                                                                                                                                                                                                                                            |                                                                                                                                                                                                                                                                                                   |                                 |                              | P_trifoliata_00143_mRNA_1.1     |
| GF0045915 | 0                            | 0                         | 0                            | 1 Hypothetical protein (1)                |                                                                                                                                                                                                                                                                                                                                                                                                                                                                            |                                                                                                                                                                                                                                                                                                   |                                 |                              | P_trifoliata_00142_mRNA_7.1     |
| GF0045914 | 0                            | 0                         | 0                            | 1 Phosphatase 2C family protein (1)       | catalytic activity [GO:0003824 molecular_function] (1); protein dephosphorylation [GO:0006470 biological_process] (1); protein serine/threonine phosphatase activity [GO:0004722 molecular_function] (1)                                                                                                                                                                                                                                                                   | PPM-type phosphatase domain [IPR001922] (1); Protein phosphatase 2C-family [IPR015655] (1)                                                                                                                                                                                                        |                                 |                              | P_trifoliata_00142_mRNA_67.1    |
| GF0045913 | 0                            | 0                         | 0                            | 1 14-3-3-like protein GF14 omicron (1)    | protein domain specific binding [GO:0019904 molecular_function] (1)                                                                                                                                                                                                                                                                                                                                                                                                        | 14-3-3 protein, conserved site [IPR023409] (1); 14-3-3 protein [IPR003008] (1); Alpha/Beta hydrolase fold [IPR029058] (1); Alpha/beta hydrolase fold-1 [IPR000073] (1); 14-3-3 domain [IPR023409] (1)                                                                                             |                                 |                              | P_trifoliata_00142_mRNA_66.1    |
| GF0045912 | 0                            | 0                         | 0                            | 1 Hypothetical protein (1)                |                                                                                                                                                                                                                                                                                                                                                                                                                                                                            |                                                                                                                                                                                                                                                                                                   |                                 |                              | P_trifoliata_00142_mRNA_54.1    |
| GF0045911 | 0                            | 0                         | 0                            | 1 Hypothetical protein (1)                |                                                                                                                                                                                                                                                                                                                                                                                                                                                                            | Phosphate-induced protein 1 [IPR006766] (1)                                                                                                                                                                                                                                                       |                                 |                              | P_trifoliata_00142_mRNA_53.1    |
| GF0045910 | 0                            | 0                         | 0                            | 1 Hypothetical protein (1)                |                                                                                                                                                                                                                                                                                                                                                                                                                                                                            |                                                                                                                                                                                                                                                                                                   |                                 |                              | P_trifoliata_00142_mRNA_42.1    |
| GF0045909 | 0                            | 0                         | 0                            | 1 Hypothetical protein (1)                |                                                                                                                                                                                                                                                                                                                                                                                                                                                                            |                                                                                                                                                                                                                                                                                                   |                                 |                              | P_trifoliata_00142_mRNA_41.1    |
| GF0045908 | 0                            | 0                         | 0                            | 1 Hypothetical protein (1)                |                                                                                                                                                                                                                                                                                                                                                                                                                                                                            |                                                                                                                                                                                                                                                                                                   |                                 |                              | P_trifoliata_00142_mRNA_40.1    |
| GF0045907 | 0                            | 0                         | 0                            | 1 Hypothetical protein (1)                | oxidoreductase activity [GO:0016491 molecular_function] (1); oxidation-reduction process [GO:005514 biological_process] (1)                                                                                                                                                                                                                                                                                                                                                | Oxoglutarate/iron-dependent dioxygenase [IPR005123] (1); Non-haem dioxygenase N-terminal domain [IPR026992] (1); Isopenicillin N synthase-like [IPR027433] (1)                                                                                                                                    |                                 |                              | P_trifoliata_00142_mRNA_23.1    |
| GF0045906 | 0                            | 0                         | 0                            | 1 Tau class glutathione S-transferase (1) | protein binding [GO:0005515 molecular_function] (1)                                                                                                                                                                                                                                                                                                                                                                                                                        | Glutathione S-transferase, C-terminal [IPR040446] (1); Thioredoxin-like fold [IPR012336] (1); Glutathione S-transferase, C-terminal-like [IPR010987] (1); Glutathione S-transferase, N-terminal [IPR040445] (1)                                                                                   |                                 |                              | P_trifoliata_00142_mRNA_14.1    |
| GF0045905 | 0                            | 0                         | 0                            | 1 Hypothetical protein (1)                | protein binding [GO:0005515 molecular_function] (1)                                                                                                                                                                                                                                                                                                                                                                                                                        | Leucine-rich repeat, typical subtype [IPR045911] (1); Leucine-rich repeat domain, L domain-like [IPR032675] (1); Leucine-rich repeat [IPR001611] (1)                                                                                                                                              |                                 |                              | P_trifoliata_00141_mRNA_5.1     |
| GF0045904 | 0                            | 0                         | 0                            | 1 Hypothetical protein (1)                | iron ion binding [GO:0005506 molecular_function] (1); L-ascorbic acid binding [GO:0031418 molecular_function] (1); oxidation-reduction process [GO:005514 biological_process] (1); oxidoreductase activity [GO:0016491 molecular_function] (1); oxidoreductase activity, acting on paired donors, with incorporation or reduction of molecular oxygen [GO:0016705 molecular_function] (1); nucleic acid binding [GO:0003676 molecular_function] (1)                        | Oxoglutarate/iron-dependent dioxygenase [IPR005123] (1); Prolyl 4-hydroxylase, alpha subunit [IPR006620] (1); Reverse transcriptase zinc-binding domain [IPR029660] (1); Ribonuclease H-like domain [IPR012337] (1)                                                                               |                                 |                              | P_trifoliata_00141_mRNA_39.1    |
| GF0045902 | 0                            | 0                         | 0                            | 1 Hypothetical protein (1)                |                                                                                                                                                                                                                                                                                                                                                                                                                                                                            |                                                                                                                                                                                                                                                                                                   |                                 |                              | P_trifoliata_00141_mRNA_37.1    |
| GF0045901 | 0                            | 0                         | 0                            | 1 Hypothetical protein (1)                | protein binding [GO:0005515 molecular_function] (1)                                                                                                                                                                                                                                                                                                                                                                                                                        | Leucine-rich repeat domain, L domain-like [IPR032675] (1); Leucine-rich repeat [IPR001611] (1)                                                                                                                                                                                                    |                                 |                              | P_trifoliata_00141_mRNA_3.1     |
| GF0045900 | 0                            | 0                         | 0                            | 1 Hypothetical protein (1)                |                                                                                                                                                                                                                                                                                                                                                                                                                                                                            |                                                                                                                                                                                                                                                                                                   |                                 |                              | P_trifoliata_00141_mRNA_28.1    |

| ID        | Num. in <i>C. celastroides</i> | Num. in <i>C. canthi</i> | Num. in <i>P. trifoliata</i> | Note                                                 | GO                                                                                                                                                                                                                                                                                                                | InterPro                                                                                                                                                                                                                                                                                                                                                                                                                         | Members in <i>C. celastroides</i> | Members in <i>C. canthi</i> | Members in <i>P. trifoliata</i> |
|-----------|--------------------------------|--------------------------|------------------------------|------------------------------------------------------|-------------------------------------------------------------------------------------------------------------------------------------------------------------------------------------------------------------------------------------------------------------------------------------------------------------------|----------------------------------------------------------------------------------------------------------------------------------------------------------------------------------------------------------------------------------------------------------------------------------------------------------------------------------------------------------------------------------------------------------------------------------|-----------------------------------|-----------------------------|---------------------------------|
| GF0045899 | 0                              | 0                        | 1                            | Hypothetical protein (1)                             |                                                                                                                                                                                                                                                                                                                   |                                                                                                                                                                                                                                                                                                                                                                                                                                  | -                                 | -                           | P_trifoliata_00141_mRNA_26.1    |
| GF0045898 | 0                              | 0                        | 1                            | Hypothetical protein (1)                             |                                                                                                                                                                                                                                                                                                                   |                                                                                                                                                                                                                                                                                                                                                                                                                                  | -                                 | -                           | P_trifoliata_00141_mRNA_24.1    |
| GF0045897 | 0                              | 0                        | 1                            | Hypothetical protein (1)                             |                                                                                                                                                                                                                                                                                                                   |                                                                                                                                                                                                                                                                                                                                                                                                                                  | -                                 | -                           | P_trifoliata_00141_mRNA_21.1    |
| GF0045896 | 0                              | 0                        | 1                            | Sesquiterpene synthase (1)                           | metabolic process [GO:0008152]<br>biological_process (1); magnesium ion binding [GO:0000287]<br>molecular_function (1); lyase activity [GO:0018629 molecular_function] (1); terpene synthase activity [GO:0010333 molecular_function] (1)                                                                         | Terpenoid cyclases/protein prenyltransferase alpha-alpha toroid [IPRO08930] (1); Terpene synthase, metal-binding domain [IPRO05630] (1); Terpene synthase, N-terminal domain [IPRO1906] (1); Isoprenoid synthase domain [IPRO08949] (1)                                                                                                                                                                                          | -                                 | -                           | P_trifoliata_00141_mRNA_19.1    |
| GF0045895 | 0                              | 0                        | 1                            | Hypothetical protein (1)                             |                                                                                                                                                                                                                                                                                                                   |                                                                                                                                                                                                                                                                                                                                                                                                                                  | -                                 | -                           | P_trifoliata_00141_mRNA_14.1    |
| GF0045894 | 0                              | 0                        | 1                            | Hypothetical protein (1)                             |                                                                                                                                                                                                                                                                                                                   |                                                                                                                                                                                                                                                                                                                                                                                                                                  | -                                 | -                           | P_trifoliata_00140_mRNA_9.1     |
| GF0045893 | 0                              | 0                        | 1                            | Hypothetical protein (1)                             |                                                                                                                                                                                                                                                                                                                   |                                                                                                                                                                                                                                                                                                                                                                                                                                  | -                                 | -                           | P_trifoliata_00140_mRNA_8.1     |
| GF0045892 | 0                              | 0                        | 1                            | Hypothetical protein (1)                             |                                                                                                                                                                                                                                                                                                                   |                                                                                                                                                                                                                                                                                                                                                                                                                                  | -                                 | -                           | P_trifoliata_00140_mRNA_7.1     |
| GF0045891 | 0                              | 0                        | 1                            | Hypothetical protein (1)                             | ATPase activity [GO:0016887 molecular_function] (1); ATP binding [GO:0005524 molecular_function] (1)                                                                                                                                                                                                              | P-loop containing nucleoside triphosphate hydrolase [IPRO27417] (1); ABC transporter-like [IPRO03439] (1)                                                                                                                                                                                                                                                                                                                        | -                                 | -                           | P_trifoliata_00140_mRNA_5.1     |
| GF0045890 | 0                              | 0                        | 1                            | Hypothetical protein (1)                             | protein binding [GO:0005515 molecular_function] (1)                                                                                                                                                                                                                                                               | F-box domain [IPRO01810] (1); Phloem protein 2-like [IPRO25886] (1)                                                                                                                                                                                                                                                                                                                                                              | -                                 | -                           | P_trifoliata_00140_mRNA_49.1    |
| GF0045889 | 0                              | 0                        | 1                            | Hypothetical protein (1)                             |                                                                                                                                                                                                                                                                                                                   |                                                                                                                                                                                                                                                                                                                                                                                                                                  | -                                 | -                           |                                 |
| GF0045888 | 0                              | 0                        | 1                            | Hypothetical protein (1)                             | ATP binding [GO:0005524 molecular_function] (1); protein kinase activity [GO:0004672 molecular_function] (1); protein phosphorylation [GO:0006468 biological_process] (1); protein binding [GO:0005515 molecular_function] (1); protein tyrosine kinase activity [GO:0004713 molecular_function] (1)              | Serine-threonine/tyrosine-protein kinase catalytic domain [IPRO1245] (1); Leucine-rich repeat [IPRO0161] (1); Protein kinase, ATP binding site [IPRO1744] (1); Concavalin A-like lectin/glucanase domain [IPRO1320] (1); Leucine-rich repeat domain, 1, domain-like [IPRO32675] (1); Protein kinase-like domain [IPRO11009] (1); Tyrosine-protein kinase, catalytic domain [IPRO2063] (1); Protein kinase domain [IPRO00719] (1) | -                                 | -                           | P_trifoliata_00140_mRNA_48.1    |
| GF0045887 | 0                              | 0                        | 1                            | Hypothetical protein (1)                             |                                                                                                                                                                                                                                                                                                                   |                                                                                                                                                                                                                                                                                                                                                                                                                                  | -                                 | -                           | P_trifoliata_00140_mRNA_44.1    |
| GF0045886 | 0                              | 0                        | 1                            | Hypothetical protein (1)                             |                                                                                                                                                                                                                                                                                                                   |                                                                                                                                                                                                                                                                                                                                                                                                                                  | -                                 | -                           | P_trifoliata_00140_mRNA_43.1    |
| GF0045885 | 0                              | 0                        | 1                            | Hypothetical protein (1)                             |                                                                                                                                                                                                                                                                                                                   |                                                                                                                                                                                                                                                                                                                                                                                                                                  | -                                 | -                           | P_trifoliata_00140_mRNA_41.1    |
| GF0045884 | 0                              | 0                        | 1                            | Hypothetical protein (1)                             |                                                                                                                                                                                                                                                                                                                   |                                                                                                                                                                                                                                                                                                                                                                                                                                  | -                                 | -                           | P_trifoliata_00140_mRNA_40.1    |
| GF0045883 | 0                              | 0                        | 1                            | Hypothetical protein (1)                             | protein binding [GO:0005515 molecular_function] (1)                                                                                                                                                                                                                                                               | F-box domain [IPRO01810] (1)                                                                                                                                                                                                                                                                                                                                                                                                     | -                                 | -                           | P_trifoliata_00140_mRNA_4.1     |
| GF0045882 | 0                              | 0                        | 1                            | Hypothetical protein (1)                             | protein kinase activity [GO:0004672 molecular_function] (1); protein phosphorylation [GO:0006468 biological_process] (1)                                                                                                                                                                                          | Serine-threonine/tyrosine-protein kinase catalytic domain [IPRO1245] (1); Protein kinase-like domain [IPRO11009] (1)                                                                                                                                                                                                                                                                                                             | -                                 | -                           | P_trifoliata_00140_mRNA_38.1    |
| GF0045881 | 0                              | 0                        | 1                            | Polynucleotidyl transferase, Ribonuclease H fold (1) |                                                                                                                                                                                                                                                                                                                   |                                                                                                                                                                                                                                                                                                                                                                                                                                  | -                                 | -                           | P_trifoliata_00140_mRNA_32.1    |
| GF0045880 | 0                              | 0                        | 1                            | Phloem protein 2-B5 (1)                              | protein binding [GO:0005515 molecular_function] (1)                                                                                                                                                                                                                                                               | Phloem protein 2-like [IPRO25886] (1); F-box domain [IPRO01810] (1)                                                                                                                                                                                                                                                                                                                                                              | -                                 | -                           | P_trifoliata_00140_mRNA_3.1     |
| GF0045879 | 0                              | 0                        | 1                            | Hypothetical protein (1)                             |                                                                                                                                                                                                                                                                                                                   |                                                                                                                                                                                                                                                                                                                                                                                                                                  | -                                 | -                           | P_trifoliata_00140_mRNA_28.1    |
| GF0045878 | 0                              | 0                        | 1                            | Hypothetical protein (1)                             |                                                                                                                                                                                                                                                                                                                   |                                                                                                                                                                                                                                                                                                                                                                                                                                  | -                                 | -                           | P_trifoliata_00140_mRNA_2.1     |
| GF0045877 | 0                              | 0                        | 1                            | Hypothetical protein (1)                             |                                                                                                                                                                                                                                                                                                                   |                                                                                                                                                                                                                                                                                                                                                                                                                                  | -                                 | -                           | P_trifoliata_00140_mRNA_18.1    |
| GF0045876 | 0                              | 0                        | 1                            | Putative enone 5-beta-reductase (1)                  |                                                                                                                                                                                                                                                                                                                   | NAD(P)-binding domain [IPRO16040] (1)                                                                                                                                                                                                                                                                                                                                                                                            | -                                 | -                           | P_trifoliata_00140_mRNA_13.1    |
| GF0045875 | 0                              | 0                        | 1                            | Hypothetical protein (1)                             |                                                                                                                                                                                                                                                                                                                   | Nodulin-like [IPRO10658] (1)                                                                                                                                                                                                                                                                                                                                                                                                     | -                                 | -                           | P_trifoliata_00139_mRNA_65.1    |
| GF0045874 | 0                              | 0                        | 1                            | Hypothetical protein (1)                             |                                                                                                                                                                                                                                                                                                                   |                                                                                                                                                                                                                                                                                                                                                                                                                                  | -                                 | -                           | P_trifoliata_00139_mRNA_57.1    |
| GF0045873 | 0                              | 0                        | 1                            | Germin-like protein subfamily 2 member 4 (1)         | manganese ion binding [GO:0030145 molecular_function] (1); nutrient reservoir activity [GO:0045735 molecular_function] (1)                                                                                                                                                                                        | Cupin 1 [IPRO06045] (1); RosC-like jelly roll fold [IPRO14710] (1); Germin [IPRO01929] (1); RosC-like cupin domain [IPRO11051] (1)                                                                                                                                                                                                                                                                                               | -                                 | -                           | P_trifoliata_00139_mRNA_47.1    |
| GF0045872 | 0                              | 0                        | 1                            | Hypothetical protein (1)                             |                                                                                                                                                                                                                                                                                                                   |                                                                                                                                                                                                                                                                                                                                                                                                                                  | -                                 | -                           | P_trifoliata_00139_mRNA_38.1    |
| GF0045871 | 0                              | 0                        | 1                            | Hypothetical protein (1)                             | manganese ion binding [GO:0030145 molecular_function] (1); nutrient reservoir activity [GO:0045735 molecular_function] (1)                                                                                                                                                                                        | RosC-like cupin domain [IPRO11051] (1); RosC-like jelly roll fold [IPRO14710] (1); Germin [IPRO01929] (1); Cupin 1 [IPRO06045] (1)                                                                                                                                                                                                                                                                                               | -                                 | -                           | P_trifoliata_00139_mRNA_36.1    |
| GF0045870 | 0                              | 0                        | 1                            | Hypothetical protein (1)                             |                                                                                                                                                                                                                                                                                                                   |                                                                                                                                                                                                                                                                                                                                                                                                                                  | -                                 | -                           | P_trifoliata_00139_mRNA_2.1     |
| GF0045869 | 0                              | 0                        | 1                            | Hypothetical protein (1)                             |                                                                                                                                                                                                                                                                                                                   |                                                                                                                                                                                                                                                                                                                                                                                                                                  | -                                 | -                           | P_trifoliata_00138_mRNA_68.1    |
| GF0045868 | 0                              | 0                        | 1                            | Hypothetical protein (1)                             |                                                                                                                                                                                                                                                                                                                   |                                                                                                                                                                                                                                                                                                                                                                                                                                  | -                                 | -                           | P_trifoliata_00138_mRNA_61.1    |
| GF0045867 | 0                              | 0                        | 1                            | Cytochrome P450 (1)                                  | oxidoreductase activity, acting on paired donors, with incorporation or reduction of molecular oxygen [GO:0016705 molecular_function] (1); oxidation-reduction process [GO:005114 biological_process] (1); heme binding [GO:0020017 molecular_function] (1); iron ion binding [GO:0005506 molecular_function] (1) | Cytochrome P450, conserved site [IPRO17972] (1); Cytochrome P450, E-class, group 1 [IPRO2401] (1); Cytochrome P450 [IPRO01129] (1)                                                                                                                                                                                                                                                                                               | -                                 | -                           | P_trifoliata_00137_mRNA_9.1     |
| GF0045866 | 0                              | 0                        | 1                            | Hypothetical protein (1)                             |                                                                                                                                                                                                                                                                                                                   |                                                                                                                                                                                                                                                                                                                                                                                                                                  | -                                 | -                           | P_trifoliata_00137_mRNA_77.1    |
| GF0045865 | 0                              | 0                        | 1                            | Hypothetical protein (1)                             |                                                                                                                                                                                                                                                                                                                   |                                                                                                                                                                                                                                                                                                                                                                                                                                  | -                                 | -                           | P_trifoliata_00137_mRNA_75.1    |
| GF0045864 | 0                              | 0                        | 1                            | NBS-LRR type disease resistance protein 1            | ADP binding [GO:0043531 molecular_function] (1)                                                                                                                                                                                                                                                                   | P-loop containing nucleoside triphosphate hydrolase [IPRO27417] (1); NB-ARC [IPRO02182] (1)                                                                                                                                                                                                                                                                                                                                      | -                                 | -                           | P_trifoliata_00137_mRNA_74.1    |
| GF0045863 | 0                              | 0                        | 1                            | Hypothetical protein (1)                             |                                                                                                                                                                                                                                                                                                                   |                                                                                                                                                                                                                                                                                                                                                                                                                                  | -                                 | -                           | P_trifoliata_00137_mRNA_73.1    |
| GF0045862 | 0                              | 0                        | 1                            | Hypothetical protein (1)                             |                                                                                                                                                                                                                                                                                                                   |                                                                                                                                                                                                                                                                                                                                                                                                                                  | -                                 | -                           | P_trifoliata_00137_mRNA_71.1    |
| GF0045861 | 0                              | 0                        | 1                            | Hypothetical protein (1)                             |                                                                                                                                                                                                                                                                                                                   |                                                                                                                                                                                                                                                                                                                                                                                                                                  | -                                 | -                           | P_trifoliata_00137_mRNA_68.1    |
| GF0045860 | 0                              | 0                        | 1                            | Hypothetical protein (1)                             |                                                                                                                                                                                                                                                                                                                   |                                                                                                                                                                                                                                                                                                                                                                                                                                  | -                                 | -                           | P_trifoliata_00137_mRNA_67.1    |
| GF0045859 | 0                              | 0                        | 1                            | Hypothetical protein (1)                             |                                                                                                                                                                                                                                                                                                                   |                                                                                                                                                                                                                                                                                                                                                                                                                                  | -                                 | -                           | P_trifoliata_00137_mRNA_65.1    |
| GF0045858 | 0                              | 0                        | 1                            | Hypothetical protein (1)                             |                                                                                                                                                                                                                                                                                                                   |                                                                                                                                                                                                                                                                                                                                                                                                                                  | -                                 | -                           | P_trifoliata_00137_mRNA_62.1    |
| GF0045857 | 0                              | 0                        | 1                            | Disease resistance protein RPS2 (1)                  | ADP binding [GO:0043531 molecular_function] (1); protein binding [GO:0005515 molecular_function] (1)                                                                                                                                                                                                              | NB-ARC [IPRO02182] (1); Leucine-rich repeat [IPRO0161] (1); P-loop containing nucleoside triphosphate hydrolase [IPRO27417] (1); Leucine-rich repeat domain, 1, domain-like [IPRO32675] (1)                                                                                                                                                                                                                                      | -                                 | -                           | P_trifoliata_00137_mRNA_59.1    |
| GF0045856 | 0                              | 0                        | 1                            | Hypothetical protein (1)                             |                                                                                                                                                                                                                                                                                                                   |                                                                                                                                                                                                                                                                                                                                                                                                                                  | -                                 | -                           | P_trifoliata_00137_mRNA_56.1    |
| GF0045855 | 0                              | 0                        | 1                            | Hypothetical protein (1)                             |                                                                                                                                                                                                                                                                                                                   |                                                                                                                                                                                                                                                                                                                                                                                                                                  | -                                 | -                           | P_trifoliata_00137_mRNA_55.1    |
| GF0045854 | 0                              | 0                        | 1                            | Hypothetical protein (1)                             | ADP binding [GO:0043531 molecular_function] (1)                                                                                                                                                                                                                                                                   | NB-ARC [IPRO02182] (1); P-loop containing nucleoside triphosphate hydrolase [IPRO27417] (1)                                                                                                                                                                                                                                                                                                                                      | -                                 | -                           | P_trifoliata_00137_mRNA_50.1    |
| GF0045853 | 0                              | 0                        | 1                            | Hypothetical protein (1)                             |                                                                                                                                                                                                                                                                                                                   | Protein of unknown function DUF4666 [IPRO31421] (1)                                                                                                                                                                                                                                                                                                                                                                              | -                                 | -                           | P_trifoliata_00137_mRNA_46.1    |
| GF0045852 | 0                              | 0                        | 1                            | Hypothetical protein (1)                             |                                                                                                                                                                                                                                                                                                                   |                                                                                                                                                                                                                                                                                                                                                                                                                                  | -                                 | -                           | P_trifoliata_00137_mRNA_38.1    |
| GF0045851 | 0                              | 0                        | 1                            | Hypothetical protein (1)                             | serine-type endopeptidase activity [GO:0004252 molecular_function] (1); proteolysis [GO:0006508 biological_process] (1); integral component of membrane [GO:0016021 cellular_component] (1)                                                                                                                       | Peptidase S5A, rhomboid [IPRO02610] (1); Peptidase S5A, rhomboid domain [IPRO22764] (1)                                                                                                                                                                                                                                                                                                                                          | -                                 | -                           | P_trifoliata_00137_mRNA_34.1    |
| GF0045850 | 0                              | 0                        | 1                            | Hypothetical protein (1)                             |                                                                                                                                                                                                                                                                                                                   |                                                                                                                                                                                                                                                                                                                                                                                                                                  | -                                 | -                           | P_trifoliata_00137_mRNA_33.1    |
| GF0045849 | 0                              | 0                        | 1                            | Hypothetical protein (1)                             | O-methyltransferase activity [GO:0008171 molecular_function] (1)                                                                                                                                                                                                                                                  | O-methyltransferase, family 3 [IPRO02935] (1); Sadenosyl-L-methionine-dependent methyltransferase [IPRO29063] (1)                                                                                                                                                                                                                                                                                                                | -                                 | -                           | P_trifoliata_00137_mRNA_30.1    |
| GF0045848 | 0                              | 0                        | 1                            | Hypothetical protein (1)                             |                                                                                                                                                                                                                                                                                                                   |                                                                                                                                                                                                                                                                                                                                                                                                                                  | -                                 | -                           | P_trifoliata_00137_mRNA_28.1    |
| GF0045847 | 0                              | 0                        | 1                            | Hypothetical protein (1)                             |                                                                                                                                                                                                                                                                                                                   |                                                                                                                                                                                                                                                                                                                                                                                                                                  | -                                 | -                           | P_trifoliata_00137_mRNA_27.1    |
| GF0045846 | 0                              | 0                        | 1                            | Hypothetical protein (1)                             |                                                                                                                                                                                                                                                                                                                   |                                                                                                                                                                                                                                                                                                                                                                                                                                  | -                                 | -                           | P_trifoliata_00137_mRNA_21.1    |
| GF0045845 | 0                              | 0                        | 1                            | Hypothetical protein (1)                             |                                                                                                                                                                                                                                                                                                                   |                                                                                                                                                                                                                                                                                                                                                                                                                                  | -                                 | -                           | P_trifoliata_00137_mRNA_19.1    |
| GF0045844 | 0                              | 0                        | 1                            | Hypothetical protein (1)                             |                                                                                                                                                                                                                                                                                                                   |                                                                                                                                                                                                                                                                                                                                                                                                                                  | -                                 | -                           | P_trifoliata_00137_mRNA_16.1    |
| GF0045843 | 0                              | 0                        | 1                            | Hypothetical protein (1)                             |                                                                                                                                                                                                                                                                                                                   |                                                                                                                                                                                                                                                                                                                                                                                                                                  | -                                 | -                           | P_trifoliata_00137_mRNA_15.1    |
| GF0045842 | 0                              | 0                        | 1                            | Hypothetical protein (1)                             |                                                                                                                                                                                                                                                                                                                   |                                                                                                                                                                                                                                                                                                                                                                                                                                  | -                                 | -                           | P_trifoliata_00137_mRNA_13.1    |
| GF0045841 | 0                              | 0                        | 1                            | Hypothetical protein (1)                             |                                                                                                                                                                                                                                                                                                                   |                                                                                                                                                                                                                                                                                                                                                                                                                                  | -                                 | -                           | P_trifoliata_00137_mRNA_12.1    |
| GF0045840 | 0                              | 0                        | 1                            | Hypothetical protein (1)                             |                                                                                                                                                                                                                                                                                                                   |                                                                                                                                                                                                                                                                                                                                                                                                                                  | -                                 | -                           | P_trifoliata_00137_mRNA_11.1    |
| GF0045839 | 0                              | 0                        | 1                            | Essential protein Yae1, putative isoform 3 (1)       |                                                                                                                                                                                                                                                                                                                   | Essential protein Yae1, N-terminal [IPRO19191] (1)                                                                                                                                                                                                                                                                                                                                                                               | -                                 | -                           | P_trifoliata_00137_mRNA_10.1    |
| GF0045838 | 0                              | 0                        | 1                            | Hypothetical protein (1)                             |                                                                                                                                                                                                                                                                                                                   |                                                                                                                                                                                                                                                                                                                                                                                                                                  | -                                 | -                           | P_trifoliata_00137_mRNA_1.1     |
| GF0045837 | 0                              | 0                        | 1                            | Hypothetical protein (1)                             |                                                                                                                                                                                                                                                                                                                   |                                                                                                                                                                                                                                                                                                                                                                                                                                  | -                                 | -                           | P_trifoliata_00136_mRNA_6.1     |
| GF0045836 | 0                              | 0                        | 1                            | Hypothetical protein (1)                             |                                                                                                                                                                                                                                                                                                                   |                                                                                                                                                                                                                                                                                                                                                                                                                                  | -                                 | -                           | P_trifoliata_00136_mRNA_58.1    |
| GF0045835 | 0                              | 0                        | 1                            | Hypothetical protein (1)                             |                                                                                                                                                                                                                                                                                                                   |                                                                                                                                                                                                                                                                                                                                                                                                                                  | -                                 | -                           | P_trifoliata_00136_mRNA_47.1    |
| GF0045834 | 0                              | 0                        | 1                            | Hypothetical protein (1)                             |                                                                                                                                                                                                                                                                                                                   |                                                                                                                                                                                                                                                                                                                                                                                                                                  | -                                 | -                           | P_trifoliata_00136_mRNA_46.1    |
| GF0045833 | 0                              | 0                        | 1                            | Eukaryotic translation initiation factor 1A (1)      | translational initiation [GO:0006413 biological_process] (1); translation initiation factor activity [GO:0003743 molecular_function] (1)                                                                                                                                                                          | Nucleic acid-binding, OB-fold [IPRO12340] (1); Translation initiation factor 1A (eIF-1A) [IPRO01253] (1)                                                                                                                                                                                                                                                                                                                         | -                                 | -                           | P_trifoliata_00136_mRNA_20.1    |
| GF0045832 | 0                              | 0                        | 1                            | Hypothetical protein (1)                             |                                                                                                                                                                                                                                                                                                                   |                                                                                                                                                                                                                                                                                                                                                                                                                                  | -                                 | -                           | P_trifoliata_00136_mRNA_14.1    |
| GF0045831 | 0                              | 0                        | 1                            | Hypothetical protein (1)                             | metal ion binding [GO:0046872 molecular_function] (1); nucleotide binding [GO:0000166 molecular_function] (1)                                                                                                                                                                                                     | P-type ATPase, A domain [IPRO08250] (1)                                                                                                                                                                                                                                                                                                                                                                                          | -                                 | -                           | P_trifoliata_00136_mRNA_1.1     |
| GF0045830 | 0                              | 0                        | 1                            | Hypothetical protein (1)                             |                                                                                                                                                                                                                                                                                                                   |                                                                                                                                                                                                                                                                                                                                                                                                                                  | -                                 | -                           | P_trifoliata_00135_mRNA_7.1     |
| GF0045829 | 0                              | 0                        | 1                            | Hypothetical protein (1)                             |                                                                                                                                                                                                                                                                                                                   |                                                                                                                                                                                                                                                                                                                                                                                                                                  | -                                 | -                           | P_trifoliata_00135_mRNA_5.1     |
| GF0045828 | 0                              | 0                        | 1                            | Hypothetical protein (1)                             |                                                                                                                                                                                                                                                                                                                   |                                                                                                                                                                                                                                                                                                                                                                                                                                  | -                                 | -                           | P_trifoliata_00135_mRNA_48.1    |
| GF0045827 | 0                              | 0                        | 1                            | Hypothetical protein (1)                             |                                                                                                                                                                                                                                                                                                                   |                                                                                                                                                                                                                                                                                                                                                                                                                                  | -                                 | -                           | P_trifoliata_00135_mRNA_46.1    |
| GF0045826 | 0                              | 0                        | 1                            | Hypothetical protein (1)                             |                                                                                                                                                                                                                                                                                                                   | RosC-like jelly roll fold [IPRO14710] (1)                                                                                                                                                                                                                                                                                                                                                                                        | -                                 | -                           | P_trifoliata_00135_mRNA_42.1    |

| ID        | Num. in <i>C. clementiae</i> | Num. in <i>C. canthia</i> | Num. in <i>P. trifoliata</i> | Note                                                                | GO                                                                                                                                                                                                                                                                                                                                                                                                               | InterPro                                                                                                                                                                                                                                                                                                  | Members in <i>C. clementiae</i> | Members in <i>C. canthia</i> | Members in <i>P. trifoliata</i> |
|-----------|------------------------------|---------------------------|------------------------------|---------------------------------------------------------------------|------------------------------------------------------------------------------------------------------------------------------------------------------------------------------------------------------------------------------------------------------------------------------------------------------------------------------------------------------------------------------------------------------------------|-----------------------------------------------------------------------------------------------------------------------------------------------------------------------------------------------------------------------------------------------------------------------------------------------------------|---------------------------------|------------------------------|---------------------------------|
| GF0045825 | 0                            | 0                         | 1                            | Germin-like protein subfamily 1 member 18 (1)                       | nitrite reservoir activity [GO:0045735 molecular_function] (1); manganese ion binding [GO:0030145 molecular_function] (1)                                                                                                                                                                                                                                                                                        | RaiC-like cupin domain [IPR011051] (1); RaiC-like jelly roll fold [IPR04710] (1); Germin [IPR001929] (1); Germin, manganese binding site [IPR019780] (1); Cupin 1 [IPR006045] (1)                                                                                                                         | -                               | -                            | P_trifoliata_00135_mRNA_41.1    |
| GF0045824 | 0                            | 0                         | 1                            | Hypothetical protein (1)                                            |                                                                                                                                                                                                                                                                                                                                                                                                                  |                                                                                                                                                                                                                                                                                                           |                                 |                              | P_trifoliata_00135_mRNA_34.1    |
| GF0045823 | 0                            | 0                         | 1                            | Hypothetical protein (1)                                            |                                                                                                                                                                                                                                                                                                                                                                                                                  |                                                                                                                                                                                                                                                                                                           |                                 |                              | P_trifoliata_00135_mRNA_32.1    |
| GF0045822 | 0                            | 0                         | 1                            | Hypothetical protein (1)                                            |                                                                                                                                                                                                                                                                                                                                                                                                                  |                                                                                                                                                                                                                                                                                                           |                                 |                              | P_trifoliata_00135_mRNA_31.1    |
| GF0045821 | 0                            | 0                         | 1                            | Hypothetical protein (1)                                            |                                                                                                                                                                                                                                                                                                                                                                                                                  |                                                                                                                                                                                                                                                                                                           |                                 |                              | P_trifoliata_00135_mRNA_19.1    |
| GF0045820 | 0                            | 0                         | 1                            | Hypothetical protein (1)                                            | zinc ion binding [GO:0008270 molecular_function] (1)                                                                                                                                                                                                                                                                                                                                                             | Proteinase-like domain [IPR008502] (1); Zinc finger, DHHC-type, palmitoyltransferase [IPR001594] (1)                                                                                                                                                                                                      |                                 |                              | P_trifoliata_00135_mRNA_18.1    |
| GF0045819 | 0                            | 0                         | 1                            | Hypothetical protein (1)                                            |                                                                                                                                                                                                                                                                                                                                                                                                                  |                                                                                                                                                                                                                                                                                                           |                                 |                              | P_trifoliata_00135_mRNA_15.1    |
| GF0045818 | 0                            | 0                         | 1                            | Hypothetical protein (1)                                            |                                                                                                                                                                                                                                                                                                                                                                                                                  |                                                                                                                                                                                                                                                                                                           |                                 |                              | P_trifoliata_00134_mRNA_9.1     |
| GF0045817 | 0                            | 0                         | 1                            | Hypothetical protein (1)                                            | O-methyltransferase activity [GO:0008171 molecular_function] (1)                                                                                                                                                                                                                                                                                                                                                 | Winged helix-turn-helix DNA-binding domain [IPR011991] (1); O-methyltransferase, family 2 [IPR001077] (1); S-adenosyl-L-methionine-dependent methyltransferase [IPR029063] (1)                                                                                                                            |                                 |                              | P_trifoliata_00134_mRNA_73.1    |
| GF0045816 | 0                            | 0                         | 1                            | Naringenin-chalcone synthase (1)                                    | catalytic activity [GO:0003824 molecular_function] (1); metabolic process [GO:0008152 biological_process] (1)                                                                                                                                                                                                                                                                                                    | Chalcone/silibene synthase, N-terminal [IPR001099] (1); Chalcone/silibene synthase, C-terminal [IPR012328] (1); Thiolase-like [IPR016039] (1)                                                                                                                                                             |                                 |                              | P_trifoliata_00134_mRNA_72.1    |
| GF0045815 | 0                            | 0                         | 1                            | Caffeic acid O-methyltransferase (1)                                | O-methyltransferase activity [GO:0008171 molecular_function] (1); methyltransferase activity [GO:0008168 molecular_function] (1)                                                                                                                                                                                                                                                                                 | S-adenosyl-L-methionine-dependent methyltransferase [IPR029063] (1); O-methyltransferase, family 2 [IPR001077] (1); Winged helix-turn-helix DNA-binding domain [IPR011991] (1); O-methyltransferase COMT-type [IPR016461] (1)                                                                             |                                 |                              | P_trifoliata_00134_mRNA_71.1    |
| GF0045814 | 0                            | 0                         | 1                            | Caffeic acid 3-O-methyltransferase (1)                              | protein dimerization activity [GO:0046983 molecular_function] (1)                                                                                                                                                                                                                                                                                                                                                | Winged helix-turn-helix DNA-binding domain [IPR011991] (1); Plant methyltransferase dimerization [IPR012967] (1)                                                                                                                                                                                          |                                 |                              | P_trifoliata_00134_mRNA_70.1    |
| GF0045813 | 0                            | 0                         | 1                            | Carboxyvinyl-carboxyphosphate phosphoryltransferase (1)             | catalytic activity [GO:0003824 molecular_function] (1)                                                                                                                                                                                                                                                                                                                                                           | Pyruvate/Phosphoenolpyruvate kinase-like domain [IPR013513] (1); P-loop containing nucleoside triphosphate hydrolase [IPR027417] (1); DEAD/DEAH box helicase domain [IPR01545] (1); Helicase superfamily 1/2, ATP-binding domain [IPR014001] (1); RNA helicase, DEAD-box type, Q motif [IPR014014] (1)    |                                 |                              | P_trifoliata_00134_mRNA_61.1    |
| GF0045812 | 0                            | 0                         | 1                            | Hypothetical protein (1)                                            | ATP binding [GO:0005524 molecular_function] (1); nucleic acid binding [GO:0003676 molecular_function] (1)                                                                                                                                                                                                                                                                                                        | Pentatricopeptide repeat [IPR002885] (1)                                                                                                                                                                                                                                                                  |                                 |                              | P_trifoliata_00134_mRNA_55.1    |
| GF0045811 | 0                            | 0                         | 1                            | Hypothetical protein (1)                                            |                                                                                                                                                                                                                                                                                                                                                                                                                  |                                                                                                                                                                                                                                                                                                           |                                 |                              | P_trifoliata_00134_mRNA_49.1    |
| GF0045810 | 0                            | 0                         | 1                            | Hypothetical protein (1)                                            |                                                                                                                                                                                                                                                                                                                                                                                                                  |                                                                                                                                                                                                                                                                                                           |                                 |                              | P_trifoliata_00134_mRNA_48.1    |
| GF0045809 | 0                            | 0                         | 1                            | Hypothetical protein (1)                                            |                                                                                                                                                                                                                                                                                                                                                                                                                  |                                                                                                                                                                                                                                                                                                           |                                 |                              | P_trifoliata_00134_mRNA_43.1    |
| GF0045808 | 0                            | 0                         | 1                            | Hypothetical protein (1)                                            |                                                                                                                                                                                                                                                                                                                                                                                                                  |                                                                                                                                                                                                                                                                                                           |                                 |                              | P_trifoliata_00134_mRNA_34.1    |
| GF0045807 | 0                            | 0                         | 1                            | Hypothetical protein (1)                                            |                                                                                                                                                                                                                                                                                                                                                                                                                  |                                                                                                                                                                                                                                                                                                           |                                 |                              | P_trifoliata_00134_mRNA_27.1    |
| GF0045806 | 0                            | 0                         | 1                            | Hypothetical protein (1)                                            | catalytic activity [GO:0003824 molecular_function] (1); metabolic process [GO:0008152 biological_process] (1)                                                                                                                                                                                                                                                                                                    | AMP-dependent synthetase/ligase [IPR006873] (1)                                                                                                                                                                                                                                                           |                                 |                              | P_trifoliata_00134_mRNA_26.1    |
| GF0045805 | 0                            | 0                         | 1                            | Hypothetical protein (1)                                            |                                                                                                                                                                                                                                                                                                                                                                                                                  | Protein of unknown function DUF241, plant [IPR004320] (1)                                                                                                                                                                                                                                                 |                                 |                              | P_trifoliata_00133_mRNA_8.1     |
| GF0045804 | 0                            | 0                         | 1                            | Hypothetical protein (1)                                            |                                                                                                                                                                                                                                                                                                                                                                                                                  |                                                                                                                                                                                                                                                                                                           |                                 |                              | P_trifoliata_00133_mRNA_7.1     |
| GF0045803 | 0                            | 0                         | 1                            | Hypothetical protein (1)                                            |                                                                                                                                                                                                                                                                                                                                                                                                                  |                                                                                                                                                                                                                                                                                                           |                                 |                              | P_trifoliata_00133_mRNA_6.1     |
| GF0045802 | 0                            | 0                         | 1                            | Hypothetical protein (1)                                            |                                                                                                                                                                                                                                                                                                                                                                                                                  |                                                                                                                                                                                                                                                                                                           |                                 |                              | P_trifoliata_00133_mRNA_5.1     |
| GF0045801 | 0                            | 0                         | 1                            | Hypothetical protein (1)                                            |                                                                                                                                                                                                                                                                                                                                                                                                                  |                                                                                                                                                                                                                                                                                                           |                                 |                              | P_trifoliata_00133_mRNA_47.1    |
| GF0045800 | 0                            | 0                         | 1                            | Hypothetical protein (1)                                            |                                                                                                                                                                                                                                                                                                                                                                                                                  |                                                                                                                                                                                                                                                                                                           |                                 |                              | P_trifoliata_00133_mRNA_40.1    |
| GF0045799 | 0                            | 0                         | 1                            | Hypothetical protein (1)                                            |                                                                                                                                                                                                                                                                                                                                                                                                                  | Alpha/Beta hydrolase fold [IPR029058] (1)                                                                                                                                                                                                                                                                 |                                 |                              | P_trifoliata_00133_mRNA_41.1    |
| GF0045798 | 0                            | 0                         | 1                            | Hypothetical protein (1)                                            |                                                                                                                                                                                                                                                                                                                                                                                                                  |                                                                                                                                                                                                                                                                                                           |                                 |                              | P_trifoliata_00133_mRNA_39.1    |
| GF0045797 | 0                            | 0                         | 1                            | Hypothetical protein (1)                                            |                                                                                                                                                                                                                                                                                                                                                                                                                  | Formin, FH2 domain [IPR015425] (1)                                                                                                                                                                                                                                                                        |                                 |                              | P_trifoliata_00133_mRNA_37.1    |
| GF0045796 | 0                            | 0                         | 1                            | Hypothetical protein (1)                                            |                                                                                                                                                                                                                                                                                                                                                                                                                  |                                                                                                                                                                                                                                                                                                           |                                 |                              | P_trifoliata_00133_mRNA_30.1    |
| GF0045795 | 0                            | 0                         | 1                            | LETM1 and EF-hand domain-containing protein 1, mitochondrial (1)    | calcium ion binding [GO:0005509 molecular_function] (1); ribosome binding [GO:0043022 molecular_function] (1)                                                                                                                                                                                                                                                                                                    | LETM1-like [IPR011685] (1); Letm1 ribosome-binding domain [IPR033122] (1); EF-Hand 1, calcium-binding site [IPR018217] (1); EF-hand domain [IPR002048] (1); EF-hand domain pair [IPR011992] (1)                                                                                                           |                                 |                              | P_trifoliata_00133_mRNA_26.1    |
| GF0045794 | 0                            | 0                         | 1                            | Hypothetical protein (1)                                            |                                                                                                                                                                                                                                                                                                                                                                                                                  |                                                                                                                                                                                                                                                                                                           |                                 |                              | P_trifoliata_00133_mRNA_24.1    |
| GF0045793 | 0                            | 0                         | 1                            | Hypothetical protein (1)                                            | translation [GO:0006412 biological_process] (1); ADP binding [GO:0043531 molecular_function] (1); structural constituent of ribosome [GO:0000735 molecular_function] (1); ribosome [GO:0005840 cellular_component] (1)                                                                                                                                                                                           | Ribosomal protein L2, C-terminal [IPR022669] (1); Ribosomal protein L2 domain 2 [IPR014722] (1); NB-ARC [IPR002182] (1); Translation protein SH1-like domain [IPR008991] (1); P-loop containing nucleoside triphosphate hydrolase [IPR027417] (1)                                                         |                                 |                              | P_trifoliata_00133_mRNA_23.1    |
| GF0045792 | 0                            | 0                         | 1                            | Hypothetical protein (1)                                            |                                                                                                                                                                                                                                                                                                                                                                                                                  |                                                                                                                                                                                                                                                                                                           |                                 |                              | P_trifoliata_00133_mRNA_20.1    |
| GF0045791 | 0                            | 0                         | 1                            | Cysteine-rich RLK (Receptor-like kinase protein) (1)                | protein tyrosine kinase activity [GO:0004713 molecular_function] (1); recognition of pollen [GO:0048544 biological_process] (1); protein phosphorylation [GO:0006468 biological_process] (1); protein kinase activity [GO:0004672 molecular_function] (1); protein serine/threonine kinase activity [GO:0004674 molecular_function] (1)                                                                          | S-locus glycoprotein domain [IPR000858] (1); S-locus receptor kinase, C-terminal [IPR021820] (1); Serine/threonine-tyrosine-protein kinase catalytic domain [IPR001245] (1); Tyrosine-protein kinase, catalytic domain [IPR020635] (1); Protein kinase-like domain [IPR011099] (1)                        |                                 |                              | P_trifoliata_00133_mRNA_17.1    |
| GF0045790 | 0                            | 0                         | 1                            | Hypothetical protein (1)                                            |                                                                                                                                                                                                                                                                                                                                                                                                                  |                                                                                                                                                                                                                                                                                                           |                                 |                              | P_trifoliata_00133_mRNA_16.1    |
| GF0045789 | 0                            | 0                         | 1                            | Hypothetical protein (1)                                            |                                                                                                                                                                                                                                                                                                                                                                                                                  |                                                                                                                                                                                                                                                                                                           |                                 |                              | P_trifoliata_00133_mRNA_15.1    |
| GF0045788 | 0                            | 0                         | 1                            | Hypothetical protein (1)                                            |                                                                                                                                                                                                                                                                                                                                                                                                                  | PAN/Apple domain [IPR003609] (1)                                                                                                                                                                                                                                                                          |                                 |                              | P_trifoliata_00133_mRNA_14.1    |
| GF0045787 | 0                            | 0                         | 1                            | Hypothetical protein (1)                                            |                                                                                                                                                                                                                                                                                                                                                                                                                  |                                                                                                                                                                                                                                                                                                           |                                 |                              | P_trifoliata_00133_mRNA_13.1    |
| GF0045786 | 0                            | 0                         | 1                            | Hypothetical protein (1)                                            |                                                                                                                                                                                                                                                                                                                                                                                                                  | Domain of unknown function DUF4218 [IPR025452] (1)                                                                                                                                                                                                                                                        |                                 |                              | P_trifoliata_00132_mRNA_47.1    |
| GF0045785 | 0                            | 0                         | 1                            | Hypothetical protein (1)                                            |                                                                                                                                                                                                                                                                                                                                                                                                                  |                                                                                                                                                                                                                                                                                                           |                                 |                              | P_trifoliata_00132_mRNA_45.1    |
| GF0045784 | 0                            | 0                         | 1                            | Hypothetical protein (1)                                            |                                                                                                                                                                                                                                                                                                                                                                                                                  |                                                                                                                                                                                                                                                                                                           |                                 |                              | P_trifoliata_00132_mRNA_43.1    |
| GF0045783 | 0                            | 0                         | 1                            | Hypothetical protein (1)                                            |                                                                                                                                                                                                                                                                                                                                                                                                                  |                                                                                                                                                                                                                                                                                                           |                                 |                              | P_trifoliata_00132_mRNA_39.1    |
| GF0045782 | 0                            | 0                         | 1                            | Purple acid phosphatase (1)                                         | metal ion binding [GO:0046872 molecular_function] (1); hydrolase activity [GO:0016787 molecular_function] (1); acid phosphatase activity [GO:0005993 molecular_function] (1)                                                                                                                                                                                                                                     | Purple acid phosphatase-like, N-terminal [IPR008963] (1); Calcium-like phosphatase domain, apical type [IPR004843] (1); Metallo-dependent phosphatase-like [IPR020052] (1); Purple acid phosphatase, N-terminal [IPR015914] (1); Iron/zinc purple acid phosphatase-like C-terminal domain [IPR025733] (1) |                                 |                              | P_trifoliata_00132_mRNA_38.1    |
| GF0045781 | 0                            | 0                         | 1                            | Hypothetical protein (1)                                            |                                                                                                                                                                                                                                                                                                                                                                                                                  | VQ [IPR008889] (1)                                                                                                                                                                                                                                                                                        |                                 |                              | P_trifoliata_00132_mRNA_18.1    |
| GF0045780 | 0                            | 0                         | 1                            | Hypothetical protein (1)                                            | cysteine-type peptidase activity [GO:0008234 molecular_function] (1); proteolysis [GO:0006508 biological_process] (1)                                                                                                                                                                                                                                                                                            | Ulp1 protease family, C-terminal catalytic domain [IPR003653] (1)                                                                                                                                                                                                                                         |                                 |                              | P_trifoliata_00132_mRNA_15.1    |
| GF0045779 | 0                            | 0                         | 1                            | Hypothetical protein (1)                                            | nucleic acid binding [GO:0003676 molecular_function] (1)                                                                                                                                                                                                                                                                                                                                                         | Ribonuclease H-like domain [IPR012337] (1)                                                                                                                                                                                                                                                                |                                 |                              | P_trifoliata_00132_mRNA_11.1    |
| GF0045778 | 0                            | 0                         | 1                            | Pentatricopeptide repeat-containing protein, putative isoform 1 (1) | protein binding [GO:0005515 molecular_function] (1)                                                                                                                                                                                                                                                                                                                                                              | Pentatricopeptide repeat [IPR002885] (1); Tetranucleotide-like helical domain [IPR011990] (1)                                                                                                                                                                                                             |                                 |                              | P_trifoliata_00131_mRNA_9.1     |
| GF0045777 | 0                            | 0                         | 1                            | Hypothetical protein (1)                                            | nucleic acid binding [GO:0003676 molecular_function] (1)                                                                                                                                                                                                                                                                                                                                                         | Ribonuclease H-like domain [IPR012337] (1)                                                                                                                                                                                                                                                                |                                 |                              | P_trifoliata_00131_mRNA_64.1    |
| GF0045776 | 0                            | 0                         | 1                            | Signal recognition particle subunit SRP68 (1)                       | endoplasmic reticulum signal peptide binding [GO:0030942 molecular_function] (1); SRP-dependent cotranslational protein targeting to membrane [GO:0006614 biological_process] (1); 7S RNA binding [GO:0008312 molecular_function] (1); signal recognition particle, endoplasmic reticulum targeting [GO:0005786 cellular_component] (1); signal recognition particle binding [GO:0005047 molecular_function] (1) | Signal recognition particle subunit SRP68 [IPR026258] (1)                                                                                                                                                                                                                                                 |                                 |                              | P_trifoliata_00131_mRNA_6.1     |
| GF0045775 | 0                            | 0                         | 1                            | Hypothetical protein (1)                                            |                                                                                                                                                                                                                                                                                                                                                                                                                  | Reverse transcriptase zinc-binding domain [IPR026960] (1)                                                                                                                                                                                                                                                 |                                 |                              | P_trifoliata_00131_mRNA_48.1    |
| GF0045774 | 0                            | 0                         | 1                            | Hypothetical protein (1)                                            |                                                                                                                                                                                                                                                                                                                                                                                                                  |                                                                                                                                                                                                                                                                                                           |                                 |                              | P_trifoliata_00131_mRNA_43.1    |
| GF0045773 | 0                            | 0                         | 1                            | Hypothetical protein (1)                                            |                                                                                                                                                                                                                                                                                                                                                                                                                  |                                                                                                                                                                                                                                                                                                           |                                 |                              | P_trifoliata_00131_mRNA_17.1    |
| GF0045772 | 0                            | 0                         | 1                            | Hypothetical protein (1)                                            |                                                                                                                                                                                                                                                                                                                                                                                                                  | Domain of unknown function DUF4283 [IPR025558] (1)                                                                                                                                                                                                                                                        |                                 |                              | P_trifoliata_00131_mRNA_11.1    |
| GF0045771 | 0                            | 0                         | 1                            | Hypothetical protein (1)                                            |                                                                                                                                                                                                                                                                                                                                                                                                                  |                                                                                                                                                                                                                                                                                                           |                                 |                              | P_trifoliata_00130_mRNA_9.1     |
| GF0045770 | 0                            | 0                         | 1                            | Putative metal tolerance protein 4-like (1)                         | cation transmembrane transporter activity [GO:0008324 molecular_function] (1); integral component of membrane [GO:0016021 cellular_component] (1); cation transport [GO:0006812 biological_process] (1); transmembrane transport [GO:0055085 biological_process] (1)                                                                                                                                             | Cation efflux protein [IPR002524] (1); Cation efflux protein transmembrane domain [IPR027469] (1)                                                                                                                                                                                                         |                                 |                              | P_trifoliata_00130_mRNA_7.1     |
| GF0045769 | 0                            | 0                         | 1                            | Hypothetical protein (1)                                            |                                                                                                                                                                                                                                                                                                                                                                                                                  |                                                                                                                                                                                                                                                                                                           |                                 |                              | P_trifoliata_00130_mRNA_5.1     |
| GF0045768 | 0                            | 0                         | 1                            | Hypothetical protein (1)                                            |                                                                                                                                                                                                                                                                                                                                                                                                                  |                                                                                                                                                                                                                                                                                                           |                                 |                              | P_trifoliata_00130_mRNA_38.1    |

| ID        | Num. in <i>C. clementiae</i> | Num. in <i>C. canihii</i> | Num. in <i>P. trifoliate</i> | Note                                                         | GO                                                                                                                                                                                                                                                                                                                | InterPro                                                                                                                                                                                                                                                                          | Members in <i>C. clementiae</i> | Members in <i>C. canihii</i> | Members in <i>P. trifoliate</i> |
|-----------|------------------------------|---------------------------|------------------------------|--------------------------------------------------------------|-------------------------------------------------------------------------------------------------------------------------------------------------------------------------------------------------------------------------------------------------------------------------------------------------------------------|-----------------------------------------------------------------------------------------------------------------------------------------------------------------------------------------------------------------------------------------------------------------------------------|---------------------------------|------------------------------|---------------------------------|
| GF0045767 | 0                            | 0                         | 1                            | Hypothetical protein (1)                                     | translation [GO:000642 biological_process] (1); intracellular [GO:0005622 cellular_component] (1); structural constituent of ribosome [GO:0003735 molecular_function] (1); ribosome [GO:0005840 cellular_component] (1)                                                                                           | Ribosomal protein L2 [IPRO02171] (1); Ribosomal protein L2, C-terminal [IPRO22609] (1); Ribosomal protein L2, domain 3 [IPRO14726] (1); Ribosomal protein L2 domain 2 [IPRO14722] (1); Translation protein S18-like domain [IPRO08991] (1); NAD(P)-binding domain [IPRO16040] (1) | -                               | -                            | P_trifoliata_00130_mRNA_37.1    |
| GF0045766 | 0                            | 0                         | 1                            | Hypothetical protein (1)                                     |                                                                                                                                                                                                                                                                                                                   |                                                                                                                                                                                                                                                                                   | -                               | -                            | P_trifoliata_00130_mRNA_34.1    |
| GF0045765 | 0                            | 0                         | 1                            | Hypothetical protein (1)                                     |                                                                                                                                                                                                                                                                                                                   |                                                                                                                                                                                                                                                                                   | -                               | -                            | P_trifoliata_00130_mRNA_33.1    |
| GF0045764 | 0                            | 0                         | 1                            | Hypothetical protein (1)                                     |                                                                                                                                                                                                                                                                                                                   |                                                                                                                                                                                                                                                                                   | -                               | -                            | P_trifoliata_00130_mRNA_30.1    |
| GF0045763 | 0                            | 0                         | 1                            | Hypothetical protein (1)                                     |                                                                                                                                                                                                                                                                                                                   | PAN/Apple domain [IPRO03609] (1)                                                                                                                                                                                                                                                  | -                               | -                            | P_trifoliata_00130_mRNA_29.1    |
| GF0045762 | 0                            | 0                         | 1                            | Hypothetical protein (1)                                     |                                                                                                                                                                                                                                                                                                                   |                                                                                                                                                                                                                                                                                   | -                               | -                            | P_trifoliata_00130_mRNA_28.1    |
| GF0045761 | 0                            | 0                         | 1                            | Hypothetical protein (1)                                     |                                                                                                                                                                                                                                                                                                                   |                                                                                                                                                                                                                                                                                   | -                               | -                            | P_trifoliata_00130_mRNA_25.1    |
| GF0045760 | 0                            | 0                         | 1                            | Hypothetical protein (1)                                     |                                                                                                                                                                                                                                                                                                                   |                                                                                                                                                                                                                                                                                   | -                               | -                            | P_trifoliata_00130_mRNA_21.1    |
| GF0045759 | 0                            | 0                         | 1                            | Hypothetical protein (1)                                     | DNA binding [GO:0003677 molecular_function] (1)                                                                                                                                                                                                                                                                   | Zinc finger, BED-type [IPRO03656] (1)                                                                                                                                                                                                                                             | -                               | -                            | P_trifoliata_00130_mRNA_18.1    |
| GF0045758 | 0                            | 0                         | 1                            | Hypothetical protein (1)                                     |                                                                                                                                                                                                                                                                                                                   |                                                                                                                                                                                                                                                                                   | -                               | -                            | P_trifoliata_00130_mRNA_17.1    |
| GF0045757 | 0                            | 0                         | 1                            | Hypothetical protein (1)                                     |                                                                                                                                                                                                                                                                                                                   |                                                                                                                                                                                                                                                                                   | -                               | -                            | P_trifoliata_00130_mRNA_11.1    |
| GF0045756 | 0                            | 0                         | 1                            | Hypothetical protein (1)                                     |                                                                                                                                                                                                                                                                                                                   |                                                                                                                                                                                                                                                                                   | -                               | -                            | P_trifoliata_00130_mRNA_10.1    |
| GF0045755 | 0                            | 0                         | 1                            | Hypothetical protein (1)                                     |                                                                                                                                                                                                                                                                                                                   |                                                                                                                                                                                                                                                                                   | -                               | -                            | P_trifoliata_00130_mRNA_1.1     |
| GF0045754 | 0                            | 0                         | 1                            | Hypothetical protein (1)                                     |                                                                                                                                                                                                                                                                                                                   |                                                                                                                                                                                                                                                                                   | -                               | -                            | P_trifoliata_00129_mRNA_63.1    |
| GF0045753 | 0                            | 0                         | 1                            | Hypothetical protein (1)                                     |                                                                                                                                                                                                                                                                                                                   |                                                                                                                                                                                                                                                                                   | -                               | -                            | P_trifoliata_00129_mRNA_60.1    |
| GF0045752 | 0                            | 0                         | 1                            | Hypothetical protein (1)                                     |                                                                                                                                                                                                                                                                                                                   |                                                                                                                                                                                                                                                                                   | -                               | -                            | P_trifoliata_00129_mRNA_58.1    |
| GF0045751 | 0                            | 0                         | 1                            | Hypothetical protein (1)                                     |                                                                                                                                                                                                                                                                                                                   |                                                                                                                                                                                                                                                                                   | -                               | -                            | P_trifoliata_00129_mRNA_53.1    |
| GF0045750 | 0                            | 0                         | 1                            | Hypothetical protein (1)                                     |                                                                                                                                                                                                                                                                                                                   |                                                                                                                                                                                                                                                                                   | -                               | -                            | P_trifoliata_00129_mRNA_46.1    |
| GF0045749 | 0                            | 0                         | 1                            | Hypothetical protein (1)                                     |                                                                                                                                                                                                                                                                                                                   |                                                                                                                                                                                                                                                                                   | -                               | -                            | P_trifoliata_00129_mRNA_34.1    |
| GF0045748 | 0                            | 0                         | 1                            | Hypothetical protein (1)                                     |                                                                                                                                                                                                                                                                                                                   |                                                                                                                                                                                                                                                                                   | -                               | -                            | P_trifoliata_00129_mRNA_30.1    |
| GF0045747 | 0                            | 0                         | 1                            | Hypothetical protein (1)                                     |                                                                                                                                                                                                                                                                                                                   |                                                                                                                                                                                                                                                                                   | -                               | -                            | P_trifoliata_00129_mRNA_24.1    |
| GF0045746 | 0                            | 0                         | 1                            | Hypothetical protein (1)                                     | oxidation-reduction process [GO:005114 biological_process] (1); oxidoreductase activity [GO:0016491 molecular_function] (1)                                                                                                                                                                                       | FAD/NAD(P)-binding domain [IPRO23753] (1)                                                                                                                                                                                                                                         | -                               | -                            | P_trifoliata_00129_mRNA_13.1    |
| GF0045745 | 0                            | 0                         | 1                            | Hypothetical protein (1)                                     |                                                                                                                                                                                                                                                                                                                   |                                                                                                                                                                                                                                                                                   | -                               | -                            | P_trifoliata_00128_mRNA_75.1    |
| GF0045744 | 0                            | 0                         | 1                            | Hypothetical protein (1)                                     |                                                                                                                                                                                                                                                                                                                   |                                                                                                                                                                                                                                                                                   | -                               | -                            | P_trifoliata_00128_mRNA_61.1    |
| GF0045743 | 0                            | 0                         | 1                            | Hypothetical protein (1)                                     | nucleic acid binding [GO:0003676 molecular_function] (1)                                                                                                                                                                                                                                                          | Ribonuclease H-like domain [IPRO12337] (1)                                                                                                                                                                                                                                        | -                               | -                            | P_trifoliata_00128_mRNA_55.1    |
| GF0045742 | 0                            | 0                         | 1                            | Hypothetical protein (1)                                     | SAM,benzoyl acid salicylic acid carboxyl methyltransferase activity [GO:0008168 methyltransferase] (1)                                                                                                                                                                                                            | methyltransferase [IPRO05299] (1); S-adenosyl-L-methionine-dependent methyltransferase [IPRO29063] (1)                                                                                                                                                                            | -                               | -                            | P_trifoliata_00128_mRNA_2.1     |
| GF0045741 | 0                            | 0                         | 1                            | Hypothetical protein (1)                                     |                                                                                                                                                                                                                                                                                                                   |                                                                                                                                                                                                                                                                                   | -                               | -                            | P_trifoliata_00128_mRNA_1.1     |
| GF0045740 | 0                            | 0                         | 1                            | Hypothetical protein (1)                                     | oxidation-reduction process [GO:005114 biological_process] (1); oxidoreductase activity, acting on paired donors, with incorporation or reduction of molecular oxygen [GO:0016705 molecular_function] (1); heme binding [GO:0020037 molecular_function] (1); iron ion binding [GO:0005506 molecular_function] (1) | Cytochrome P450 [IPRO01128] (1)                                                                                                                                                                                                                                                   | -                               | -                            | P_trifoliata_00127_mRNA_7.1     |
| GF0045739 | 0                            | 0                         | 1                            | Hypothetical protein (1)                                     |                                                                                                                                                                                                                                                                                                                   |                                                                                                                                                                                                                                                                                   | -                               | -                            | P_trifoliata_00127_mRNA_67.1    |
| GF0045738 | 0                            | 0                         | 1                            | Hypothetical protein (1)                                     |                                                                                                                                                                                                                                                                                                                   |                                                                                                                                                                                                                                                                                   | -                               | -                            | P_trifoliata_00127_mRNA_62.1    |
| GF0045737 | 0                            | 0                         | 1                            | Hypothetical protein (1)                                     |                                                                                                                                                                                                                                                                                                                   |                                                                                                                                                                                                                                                                                   | -                               | -                            | P_trifoliata_00127_mRNA_61.1    |
| GF0045736 | 0                            | 0                         | 1                            | Hypothetical protein (1)                                     |                                                                                                                                                                                                                                                                                                                   |                                                                                                                                                                                                                                                                                   | -                               | -                            | P_trifoliata_00127_mRNA_60.1    |
| GF0045735 | 0                            | 0                         | 1                            | Hypothetical protein (1)                                     | oxidation-reduction process [GO:005114 biological_process] (1); oxidoreductase activity, acting on paired donors, with incorporation or reduction of molecular oxygen [GO:0016705 molecular_function] (1); iron ion binding [GO:0005506 molecular_function] (1); heme binding [GO:0020037 molecular_function] (1) | Cytochrome P450 [IPRO01128] (1)                                                                                                                                                                                                                                                   | -                               | -                            | P_trifoliata_00127_mRNA_6.1     |
| GF0045734 | 0                            | 0                         | 1                            | Hypothetical protein (1)                                     |                                                                                                                                                                                                                                                                                                                   |                                                                                                                                                                                                                                                                                   | -                               | -                            | P_trifoliata_00127_mRNA_59.1    |
| GF0045733 | 0                            | 0                         | 1                            | Hypothetical protein (1)                                     |                                                                                                                                                                                                                                                                                                                   |                                                                                                                                                                                                                                                                                   | -                               | -                            | P_trifoliata_00127_mRNA_58.1    |
| GF0045732 | 0                            | 0                         | 1                            | Hypothetical protein (1)                                     |                                                                                                                                                                                                                                                                                                                   |                                                                                                                                                                                                                                                                                   | -                               | -                            | P_trifoliata_00127_mRNA_53.1    |
| GF0045731 | 0                            | 0                         | 1                            | Hypothetical protein (1)                                     |                                                                                                                                                                                                                                                                                                                   |                                                                                                                                                                                                                                                                                   | -                               | -                            | P_trifoliata_00127_mRNA_52.1    |
| GF0045730 | 0                            | 0                         | 1                            | Hypothetical protein (1)                                     |                                                                                                                                                                                                                                                                                                                   |                                                                                                                                                                                                                                                                                   | -                               | -                            | P_trifoliata_00127_mRNA_51.1    |
| GF0045729 | 0                            | 0                         | 1                            | Hypothetical protein (1)                                     |                                                                                                                                                                                                                                                                                                                   |                                                                                                                                                                                                                                                                                   | -                               | -                            | P_trifoliata_00127_mRNA_49.1    |
| GF0045728 | 0                            | 0                         | 1                            | Hypothetical protein (1)                                     |                                                                                                                                                                                                                                                                                                                   |                                                                                                                                                                                                                                                                                   | -                               | -                            | P_trifoliata_00127_mRNA_45.1    |
| GF0045727 | 0                            | 0                         | 1                            | Hypothetical protein (1)                                     |                                                                                                                                                                                                                                                                                                                   |                                                                                                                                                                                                                                                                                   | -                               | -                            | P_trifoliata_00127_mRNA_43.1    |
| GF0045726 | 0                            | 0                         | 1                            | Cofactor O-demethylase (1)                                   | oxidoreductase activity [GO:0016491 molecular_function] (1); oxidation-reduction process [GO:005114 biological_process] (1)                                                                                                                                                                                       | Non-haem dioxygenase N-terminal domain [IPRO26992] (1); Isopenicillin N synthase-like [IPRO27443] (1); Oxoglutarate/iron-dependent dioxygenase [IPRO05123] (1)                                                                                                                    | -                               | -                            | P_trifoliata_00127_mRNA_42.1    |
| GF0045725 | 0                            | 0                         | 1                            | Hypothetical protein (1)                                     |                                                                                                                                                                                                                                                                                                                   |                                                                                                                                                                                                                                                                                   | -                               | -                            | P_trifoliata_00127_mRNA_40.1    |
| GF0045724 | 0                            | 0                         | 1                            | Hypothetical protein (1)                                     |                                                                                                                                                                                                                                                                                                                   |                                                                                                                                                                                                                                                                                   | -                               | -                            | P_trifoliata_00127_mRNA_39.1    |
| GF0045723 | 0                            | 0                         | 1                            | Hypothetical protein (1)                                     | oxidation-reduction process [GO:005114 biological_process] (1); oxidoreductase activity [GO:0016491 molecular_function] (1)                                                                                                                                                                                       | Oxoglutarate/iron-dependent dioxygenase [IPRO05123] (1); Non-haem dioxygenase N-terminal domain [IPRO26992] (1); Isopenicillin N synthase-like [IPRO27443] (1)                                                                                                                    | -                               | -                            | P_trifoliata_00127_mRNA_36.1    |
| GF0045722 | 0                            | 0                         | 1                            | 2OG-Fe(II) oxygenase family oxidoreductase (1)               | oxidoreductase activity [GO:0016491 molecular_function] (1); oxidation-reduction process [GO:005114 biological_process] (1)                                                                                                                                                                                       | Oxoglutarate/iron-dependent dioxygenase [IPRO05123] (1); Isopenicillin N synthase-like [IPRO27443] (1)                                                                                                                                                                            | -                               | -                            | P_trifoliata_00127_mRNA_35.1    |
| GF0045721 | 0                            | 0                         | 1                            | Sensence-related gene 1 (1)                                  | oxidation-reduction process [GO:005114 biological_process] (1); oxidoreductase activity [GO:0016491 molecular_function] (1)                                                                                                                                                                                       | Oxoglutarate/iron-dependent dioxygenase [IPRO05123] (1); Isopenicillin N synthase-like [IPRO27443] (1); Non-haem dioxygenase N-terminal domain [IPRO26992] (1)                                                                                                                    | -                               | -                            | P_trifoliata_00127_mRNA_34.1    |
| GF0045720 | 0                            | 0                         | 1                            | Hypothetical protein (1)                                     |                                                                                                                                                                                                                                                                                                                   | Non-haem dioxygenase N-terminal domain [IPRO26992] (1); Isopenicillin N synthase-like [IPRO27443] (1)                                                                                                                                                                             | -                               | -                            | P_trifoliata_00127_mRNA_32.1    |
| GF0045719 | 0                            | 0                         | 1                            | Hypothetical protein (1)                                     | mitochondrion [GO:0005739 cellular_component] (1); regulation of cellular, DNA-templated [GO:0006355 biological_process] (1); double-stranded DNA binding [GO:0003690 molecular_function] (1)                                                                                                                     | Mitochondrial transcription termination factor [IPRO03690] (1)                                                                                                                                                                                                                    | -                               | -                            | P_trifoliata_00127_mRNA_3.1     |
| GF0045718 | 0                            | 0                         | 1                            | Phenylcoumaran benzylic ether reductase-like protein (1)     |                                                                                                                                                                                                                                                                                                                   | NmIa-like domain [IPRO08030] (1)                                                                                                                                                                                                                                                  | -                               | -                            | P_trifoliata_00127_mRNA_2.1     |
| GF0045717 | 0                            | 0                         | 1                            | Hypothetical protein (1)                                     |                                                                                                                                                                                                                                                                                                                   |                                                                                                                                                                                                                                                                                   | -                               | -                            | P_trifoliata_00126_mRNA_7.1     |
| GF0045716 | 0                            | 0                         | 1                            | Hypothetical protein (1)                                     |                                                                                                                                                                                                                                                                                                                   |                                                                                                                                                                                                                                                                                   | -                               | -                            | P_trifoliata_00126_mRNA_58.1    |
| GF0045715 | 0                            | 0                         | 1                            | Hypothetical protein (1)                                     | nucleotide binding [GO:0000166 molecular_function] (1); calmodulin binding [GO:0005516 molecular_function] (1)                                                                                                                                                                                                    | P-type ATPase, cytoplasmic domain N [IPRO23299] (1); Cation-transporting P-type ATPase, N-terminal [IPRO04014] (1); Calcium-transporting P-type ATPase, N-terminal autoinhibitory domain [IPRO24750] (1)                                                                          | -                               | -                            | P_trifoliata_00126_mRNA_57.1    |
| GF0045714 | 0                            | 0                         | 1                            | Nodulin family protein (1)                                   |                                                                                                                                                                                                                                                                                                                   | Major facilitator superfamily domain [IPRO20846] (1); Nodulin-like [IPRO10658] (1)                                                                                                                                                                                                | -                               | -                            | P_trifoliata_00126_mRNA_38.1    |
| GF0045713 | 0                            | 0                         | 1                            | Hypothetical protein (1)                                     |                                                                                                                                                                                                                                                                                                                   |                                                                                                                                                                                                                                                                                   | -                               | -                            | P_trifoliata_00126_mRNA_35.1    |
| GF0045712 | 0                            | 0                         | 1                            | Hypothetical protein (1)                                     |                                                                                                                                                                                                                                                                                                                   |                                                                                                                                                                                                                                                                                   | -                               | -                            | P_trifoliata_00126_mRNA_3.1     |
| GF0045711 | 0                            | 0                         | 1                            | Hypothetical protein (1)                                     |                                                                                                                                                                                                                                                                                                                   |                                                                                                                                                                                                                                                                                   | -                               | -                            | P_trifoliata_00126_mRNA_28.1    |
| GF0045710 | 0                            | 0                         | 1                            | Hypothetical protein (1)                                     | cysteine-type peptidase activity [GO:0008224 molecular_function] (1); proteolysis [GO:0006008 biological_process] (1)                                                                                                                                                                                             | Domain of unknown function DUF1985 [IPRO15410] (1); Ulp1 protease family, C-terminal catalytic domain [IPRO06653] (1)                                                                                                                                                             | -                               | -                            | P_trifoliata_00126_mRNA_11.1    |
| GF0045709 | 0                            | 0                         | 1                            | Hypothetical protein (1)                                     |                                                                                                                                                                                                                                                                                                                   |                                                                                                                                                                                                                                                                                   | -                               | -                            | P_trifoliata_00125_mRNA_6.1     |
| GF0045708 | 0                            | 0                         | 1                            | Hypothetical protein (1)                                     | DNA binding [GO:0003677 molecular_function] (1)                                                                                                                                                                                                                                                                   | Homeodomain-like [IPRO09057] (1); SANT/Myb domain [IPRO01005] (1); Myb domain [IPRO17930] (1)                                                                                                                                                                                     | -                               | -                            | P_trifoliata_00125_mRNA_54.1    |
| GF0045707 | 0                            | 0                         | 1                            | Hypothetical protein (1)                                     |                                                                                                                                                                                                                                                                                                                   |                                                                                                                                                                                                                                                                                   | -                               | -                            | P_trifoliata_00125_mRNA_5.1     |
| GF0045706 | 0                            | 0                         | 1                            | Hypothetical protein (1)                                     |                                                                                                                                                                                                                                                                                                                   |                                                                                                                                                                                                                                                                                   | -                               | -                            | P_trifoliata_00125_mRNA_39.1    |
| GF0045705 | 0                            | 0                         | 1                            | Hypothetical protein (1)                                     |                                                                                                                                                                                                                                                                                                                   |                                                                                                                                                                                                                                                                                   | -                               | -                            | P_trifoliata_00125_mRNA_35.1    |
| GF0045704 | 0                            | 0                         | 1                            | Hypothetical protein (1)                                     |                                                                                                                                                                                                                                                                                                                   |                                                                                                                                                                                                                                                                                   | -                               | -                            | P_trifoliata_00125_mRNA_32.1    |
| GF0045703 | 0                            | 0                         | 1                            | Isoprene synthase (1)                                        | metabolic process [GO:0008152 biological_process] (1); magnesium ion binding [GO:0000287 molecular_function] (1); lyase activity [GO:0016529 molecular_function] (1); terpene synthase activity [GO:0010333 molecular_function] (1)                                                                               | Isoprenoid synthase domain [IPRO08949] (1); Terpene synthase, N-terminal domain [IPRO01906] (1); Terpene synthase, metal-binding domain [IPRO05630] (1); Terpenoid cyclases/protein prenyltransferase alpha-alpha toroid [IPRO08930] (1)                                          | -                               | -                            | P_trifoliata_00125_mRNA_29.1    |
| GF0045702 | 0                            | 0                         | 1                            | (3S)-limonol(E)-nerolidol(E,E)-geranyl linolool synthase (1) | magnesium ion binding [GO:0000287 molecular_function] (1); terpene synthase activity [GO:0010333 molecular_function] (1); lyase activity [GO:0016529 molecular_function] (1); metabolic process [GO:0008152 biological_process] (1)                                                                               | Terpene synthase, N-terminal domain [IPRO01906] (1); Terpene synthase, metal-binding domain [IPRO05630] (1); Terpenoid cyclases/protein prenyltransferase alpha-alpha toroid [IPRO08930] (1); Isoprenoid synthase domain [IPRO08949] (1)                                          | -                               | -                            | P_trifoliata_00125_mRNA_26.1    |
| GF0045701 | 0                            | 0                         | 1                            | Hypothetical protein (1)                                     |                                                                                                                                                                                                                                                                                                                   |                                                                                                                                                                                                                                                                                   | -                               | -                            | P_trifoliata_00125_mRNA_20.1    |

| ID        | Num. in <i>C. clementiae</i> | Num. in <i>C. autohii</i> | Num. in <i>P. trifoliata</i> | Note                                                                     | GO                                                                                                                                                                                                                                                                                                                                                                                                                   | InterPro                                                                                                                                                                                                                            | Members in <i>C. clementiae</i> | Members in <i>C. autohii</i> | Members in <i>P. trifoliata</i> |
|-----------|------------------------------|---------------------------|------------------------------|--------------------------------------------------------------------------|----------------------------------------------------------------------------------------------------------------------------------------------------------------------------------------------------------------------------------------------------------------------------------------------------------------------------------------------------------------------------------------------------------------------|-------------------------------------------------------------------------------------------------------------------------------------------------------------------------------------------------------------------------------------|---------------------------------|------------------------------|---------------------------------|
| GF0045700 | 0                            | 0                         | 0                            | 1 Hypothetical protein (1)                                               |                                                                                                                                                                                                                                                                                                                                                                                                                      | Protein of unknown function DUF538 [IPRO07493] (1)                                                                                                                                                                                  | -                               | -                            | P_trifoliata_00125_mRNA_13.1    |
| GF0045699 | 0                            | 0                         | 0                            | 1 Hypothetical protein (1)                                               | pectinesterase activity [GO:0030599 molecular_function] (1); cell wall [GO:0005618 cellular_component] (1); cell wall modification [GO:0042545 biological_process] (1)                                                                                                                                                                                                                                               | Pectinesterase, catalytic [IPRO00070] (1); Pectin lyase fold [IPRO12334] (1); Pectin lyase fold/violence factor [IPRO11050] (1)                                                                                                     | -                               | -                            | P_trifoliata_00124_mRNA_9.1     |
| GF0045698 | 0                            | 0                         | 0                            | 1 Hypothetical protein (1)                                               |                                                                                                                                                                                                                                                                                                                                                                                                                      |                                                                                                                                                                                                                                     | -                               | -                            | P_trifoliata_00124_mRNA_6.1     |
| GF0045697 | 0                            | 0                         | 0                            | 1 Hypothetical protein (1)                                               |                                                                                                                                                                                                                                                                                                                                                                                                                      |                                                                                                                                                                                                                                     | -                               | -                            | P_trifoliata_00124_mRNA_53.1    |
| GF0045696 | 0                            | 0                         | 0                            | 1 Hypothetical protein (1)                                               |                                                                                                                                                                                                                                                                                                                                                                                                                      |                                                                                                                                                                                                                                     | -                               | -                            | P_trifoliata_00124_mRNA_52.1    |
| GF0045695 | 0                            | 0                         | 0                            | 1 Hypothetical protein (1)                                               |                                                                                                                                                                                                                                                                                                                                                                                                                      |                                                                                                                                                                                                                                     | -                               | -                            | P_trifoliata_00124_mRNA_40.1    |
| GF0045694 | 0                            | 0                         | 0                            | 1 SNF1-related protein kinase regulatory subunit gamma 1, putative (1)   |                                                                                                                                                                                                                                                                                                                                                                                                                      | CBS domain [IPRO000644] (1)                                                                                                                                                                                                         | -                               | -                            | P_trifoliata_00124_mRNA_39.1    |
| GF0045693 | 0                            | 0                         | 0                            | 1 Pollen-specific protein SF3 (1)                                        | zinc ion binding [GO:0008270 molecular_function] (1)                                                                                                                                                                                                                                                                                                                                                                 | Zinc finger, LIM-type [IPRO01781] (1)                                                                                                                                                                                               | -                               | -                            | P_trifoliata_00124_mRNA_32.1    |
| GF0045692 | 0                            | 0                         | 0                            | 1 Hypothetical protein (1)                                               |                                                                                                                                                                                                                                                                                                                                                                                                                      |                                                                                                                                                                                                                                     | -                               | -                            | P_trifoliata_00124_mRNA_31.1    |
| GF0045691 | 0                            | 0                         | 0                            | 1 Pectinesterase 31 (1)                                                  | cell wall modification [GO:0042545 biological_process] (1); cell wall [GO:0005618 cellular_component] (1); pectinesterase activity [GO:0030599 molecular_function] (1)                                                                                                                                                                                                                                               | Pectin lyase fold [IPRO12334] (1); Pectinesterase, catalytic [IPRO00070] (1); Pectinesterase, Tyr active site [IPRO18040] (1); Pectin lyase fold/violence factor [IPRO11050] (1)                                                    | -                               | -                            | P_trifoliata_00124_mRNA_21.1    |
| GF0045690 | 0                            | 0                         | 0                            | 1 Hypothetical protein (1)                                               | protein binding [GO:0005515 molecular_function] (1)                                                                                                                                                                                                                                                                                                                                                                  | Leucine-rich repeat domain, L domain-like [IPRO32675] (1); IQ motif, EF-hand binding site [IPRO00048] (1)                                                                                                                           | -                               | -                            | P_trifoliata_00124_mRNA_2.1     |
| GF0045889 | 0                            | 0                         | 0                            | 1 Hypothetical protein (1)                                               |                                                                                                                                                                                                                                                                                                                                                                                                                      |                                                                                                                                                                                                                                     | -                               | -                            | P_trifoliata_00124_mRNA_17.1    |
| GF0045888 | 0                            | 0                         | 0                            | 1 Hypothetical protein (1)                                               |                                                                                                                                                                                                                                                                                                                                                                                                                      |                                                                                                                                                                                                                                     | -                               | -                            | P_trifoliata_00124_mRNA_16.1    |
| GF0045887 | 0                            | 0                         | 0                            | 1 Hypothetical protein (1)                                               |                                                                                                                                                                                                                                                                                                                                                                                                                      |                                                                                                                                                                                                                                     | -                               | -                            | P_trifoliata_00124_mRNA_13.1    |
| GF0045886 | 0                            | 0                         | 0                            | 1 Probable pectinesterase 67 (1)                                         | cell wall [GO:0005618 cellular_component] (1); cell wall modification [GO:0042545 biological_process] (1); pectinesterase activity [GO:0030599 molecular_function] (1)                                                                                                                                                                                                                                               | Pectinesterase, catalytic [IPRO00070] (1); Pectin lyase fold [IPRO12334] (1); Pectinesterase, Asp active site [IPRO33133] (1); Pectin lyase fold/violence factor [IPRO11050] (1)                                                    | -                               | -                            | P_trifoliata_00124_mRNA_10.1    |
| GF0045885 | 0                            | 0                         | 0                            | 1 Hypothetical protein (1)                                               |                                                                                                                                                                                                                                                                                                                                                                                                                      |                                                                                                                                                                                                                                     | -                               | -                            | P_trifoliata_00124_mRNA_1.1     |
| GF0045884 | 0                            | 0                         | 0                            | 1 Hypothetical protein (1)                                               |                                                                                                                                                                                                                                                                                                                                                                                                                      |                                                                                                                                                                                                                                     | -                               | -                            | P_trifoliata_00123_mRNA_70.1    |
| GF0045883 | 0                            | 0                         | 0                            | 1 Hypothetical protein (1)                                               |                                                                                                                                                                                                                                                                                                                                                                                                                      |                                                                                                                                                                                                                                     | -                               | -                            | P_trifoliata_00123_mRNA_65.1    |
| GF0045882 | 0                            | 0                         | 0                            | 1 Translation initiation factor 3 family protein, putative isoform 2 (1) | translational initiation [GO:0006413 biological_process] (1); translation initiation factor activity [GO:0003743 molecular_function] (1)                                                                                                                                                                                                                                                                             | Translation initiation factor 3 [IPRO01288] (1)                                                                                                                                                                                     | -                               | -                            | P_trifoliata_00123_mRNA_63.1    |
| GF0045881 | 0                            | 0                         | 0                            | 1 Hypothetical protein (1)                                               |                                                                                                                                                                                                                                                                                                                                                                                                                      | Gluathione S-transferase, C-terminal-like [IPRO10987] (1)                                                                                                                                                                           | -                               | -                            | P_trifoliata_00123_mRNA_52.1    |
| GF0045880 | 0                            | 0                         | 0                            | 1 Hypothetical protein (1)                                               |                                                                                                                                                                                                                                                                                                                                                                                                                      |                                                                                                                                                                                                                                     | -                               | -                            | P_trifoliata_00123_mRNA_49.1    |
| GF0045879 | 0                            | 0                         | 0                            | 1 Hypothetical protein (1)                                               |                                                                                                                                                                                                                                                                                                                                                                                                                      |                                                                                                                                                                                                                                     | -                               | -                            | P_trifoliata_00123_mRNA_48.1    |
| GF0045878 | 0                            | 0                         | 0                            | 1 Hypothetical protein (1)                                               |                                                                                                                                                                                                                                                                                                                                                                                                                      |                                                                                                                                                                                                                                     | -                               | -                            | P_trifoliata_00123_mRNA_47.1    |
| GF0045877 | 0                            | 0                         | 0                            | 1 Hypothetical protein (1)                                               |                                                                                                                                                                                                                                                                                                                                                                                                                      |                                                                                                                                                                                                                                     | -                               | -                            | P_trifoliata_00123_mRNA_46.1    |
| GF0045876 | 0                            | 0                         | 0                            | 1 Hypothetical protein (1)                                               |                                                                                                                                                                                                                                                                                                                                                                                                                      |                                                                                                                                                                                                                                     | -                               | -                            | P_trifoliata_00123_mRNA_45.1    |
| GF0045875 | 0                            | 0                         | 0                            | 1 Hypothetical protein (1)                                               |                                                                                                                                                                                                                                                                                                                                                                                                                      |                                                                                                                                                                                                                                     | -                               | -                            | P_trifoliata_00123_mRNA_44.1    |
| GF0045874 | 0                            | 0                         | 0                            | 1 Hypothetical protein (1)                                               |                                                                                                                                                                                                                                                                                                                                                                                                                      |                                                                                                                                                                                                                                     | -                               | -                            | P_trifoliata_00123_mRNA_43.1    |
| GF0045873 | 0                            | 0                         | 0                            | 1 Hypothetical protein (1)                                               |                                                                                                                                                                                                                                                                                                                                                                                                                      |                                                                                                                                                                                                                                     | -                               | -                            | P_trifoliata_00123_mRNA_42.1    |
| GF0045872 | 0                            | 0                         | 0                            | 1 Hypothetical protein (1)                                               |                                                                                                                                                                                                                                                                                                                                                                                                                      | Sieve element occlusion, N-terminal [IPRO27942] (1)                                                                                                                                                                                 | -                               | -                            | P_trifoliata_00123_mRNA_38.1    |
| GF0045871 | 0                            | 0                         | 0                            | 1 Hypothetical protein (1)                                               |                                                                                                                                                                                                                                                                                                                                                                                                                      | Protein of unknown function DUF538 [IPRO07493] (1)                                                                                                                                                                                  | -                               | -                            | P_trifoliata_00123_mRNA_36.1    |
| GF0045870 | 0                            | 0                         | 0                            | 1 Ac-like transposase THELMA13 (1)                                       | protein dimerization activity [GO:0046983 molecular_function] (1); nucleic acid binding [GO:0003676 molecular_function] (1); DNA binding [GO:0003677 molecular_function] (1)                                                                                                                                                                                                                                         | HAT, C-terminal dimerization domain [IPRO08906] (1); hAT-like transposase, RNase-H fold [IPRO25525] (1); Ribonuclease H-like domain [IPRO12337] (1)                                                                                 | -                               | -                            | P_trifoliata_00123_mRNA_34.1    |
| GF0045869 | 0                            | 0                         | 0                            | 1 Hypothetical protein (1)                                               |                                                                                                                                                                                                                                                                                                                                                                                                                      |                                                                                                                                                                                                                                     | -                               | -                            | P_trifoliata_00123_mRNA_29.1    |
| GF0045868 | 0                            | 0                         | 0                            | 1 Vesicle transport v-SNARE 13 (1)                                       | vesicle-mediated transport [GO:016192 biological_process] (1); SNAP receptor activity [GO:0005484 molecular_function] (1); intracellular protein transport [GO:0006886 biological_process] (1); Golgi apparatus [GO:0005794 cellular_component] (1); membrane [GO:0016020 cellular_component] (1); transport [GO:0006810 biological_process] (1)                                                                     | v-SNARE [IPRO10989] (1); GNSR2/Membrin/Sl [IPRO27027] (1); Vesicle transport v-SNARE, N-terminal [IPRO07705] (1)                                                                                                                    | -                               | -                            | P_trifoliata_00123_mRNA_27.1    |
| GF0045867 | 0                            | 0                         | 0                            | 1 Hypothetical protein (1)                                               |                                                                                                                                                                                                                                                                                                                                                                                                                      |                                                                                                                                                                                                                                     | -                               | -                            | P_trifoliata_00123_mRNA_20.1    |
| GF0045866 | 0                            | 0                         | 0                            | 1 Hypothetical protein (1)                                               |                                                                                                                                                                                                                                                                                                                                                                                                                      |                                                                                                                                                                                                                                     | -                               | -                            | P_trifoliata_00123_mRNA_2.1     |
| GF0045865 | 0                            | 0                         | 0                            | 1 Hypothetical protein (1)                                               |                                                                                                                                                                                                                                                                                                                                                                                                                      |                                                                                                                                                                                                                                     | -                               | -                            | P_trifoliata_00122_mRNA_77.1    |
| GF0045864 | 0                            | 0                         | 0                            | 1 Hypothetical protein (1)                                               |                                                                                                                                                                                                                                                                                                                                                                                                                      |                                                                                                                                                                                                                                     | -                               | -                            | P_trifoliata_00122_mRNA_74.1    |
| GF0045863 | 0                            | 0                         | 0                            | 1 Hypothetical protein (1)                                               |                                                                                                                                                                                                                                                                                                                                                                                                                      |                                                                                                                                                                                                                                     | -                               | -                            | P_trifoliata_00122_mRNA_71.1    |
| GF0045862 | 0                            | 0                         | 0                            | 1 Hypothetical protein (1)                                               |                                                                                                                                                                                                                                                                                                                                                                                                                      |                                                                                                                                                                                                                                     | -                               | -                            | P_trifoliata_00122_mRNA_60.1    |
| GF0045861 | 0                            | 0                         | 0                            | 1 Hypothetical protein (1)                                               |                                                                                                                                                                                                                                                                                                                                                                                                                      |                                                                                                                                                                                                                                     | -                               | -                            | P_trifoliata_00122_mRNA_6.1     |
| GF0045860 | 0                            | 0                         | 0                            | 1 Hypothetical protein (1)                                               |                                                                                                                                                                                                                                                                                                                                                                                                                      |                                                                                                                                                                                                                                     | -                               | -                            | P_trifoliata_00122_mRNA_59.1    |
| GF0045859 | 0                            | 0                         | 0                            | 1 Mo25 family protein (1)                                                | binding [GO:0005488 molecular_function] (1)                                                                                                                                                                                                                                                                                                                                                                          | Armadillo-like helical [IPRO11989] (1); Mo25-like [IPRO13878] (1); Armadillo-type fold [IPRO16024] (1)                                                                                                                              | -                               | -                            | P_trifoliata_00122_mRNA_49.4    |
| GF0045858 | 0                            | 0                         | 0                            | 1 Hypothetical protein (1)                                               | binding [GO:0005488 molecular_function] (1)                                                                                                                                                                                                                                                                                                                                                                          | Armadillo-type fold [IPRO16024] (1); Armadillo-like helical [IPRO11989] (1); Mo25-like [IPRO13878] (1)                                                                                                                              | -                               | -                            | P_trifoliata_00122_mRNA_48.1    |
| GF0045857 | 0                            | 0                         | 0                            | 1 Hypothetical protein (1)                                               |                                                                                                                                                                                                                                                                                                                                                                                                                      |                                                                                                                                                                                                                                     | -                               | -                            | P_trifoliata_00122_mRNA_43.1    |
| GF0045856 | 0                            | 0                         | 0                            | 1 Xyloglucan endotransglucosylase/hydrolase protein A (1)                | xyloglucan [GO:0048046 cellular_component] (1); cellular glucan metabolic process [GO:0006073 biological_process] (1); hydrolase activity, hydrolyzing O-glycosyl compounds [GO:0004553 molecular_function] (1); cell wall [GO:0005618 cellular_component] (1); carbohydrate metabolic process [GO:0005975 biological_process] (1); xyloglucan:xyloglucosyl transferase activity [GO:0016762 molecular_function] (1) | Glycoside hydrolase family 16 [IPRO00757] (1); Xyloglucan endotransglucosylase, C-terminal [IPRO10713] (1); Cuccinvarin-like A-like lectin/glucanase domain [IPRO13320] (1)                                                         | -                               | -                            | P_trifoliata_00122_mRNA_42.1    |
| GF0045855 | 0                            | 0                         | 0                            | 1 Hypothetical protein (1)                                               |                                                                                                                                                                                                                                                                                                                                                                                                                      |                                                                                                                                                                                                                                     | -                               | -                            | P_trifoliata_00122_mRNA_3.1     |
| GF0045854 | 0                            | 0                         | 0                            | 1 Disease resistance protein RPP8 (1)                                    | ADP binding [GO:0043531 molecular_function] (1)                                                                                                                                                                                                                                                                                                                                                                      | Leucine-rich repeat domain, L domain-like [IPRO32675] (1); P-loop containing nucleoside triphosphate hydrolase [IPRO27417] (1); NB-ARC [IPRO02182] (1)                                                                              | -                               | -                            | P_trifoliata_00122_mRNA_22.1    |
| GF0045853 | 0                            | 0                         | 0                            | 1 Hypothetical protein (1)                                               |                                                                                                                                                                                                                                                                                                                                                                                                                      |                                                                                                                                                                                                                                     | -                               | -                            | P_trifoliata_00122_mRNA_20.1    |
| GF0045852 | 0                            | 0                         | 0                            | 1 Hypothetical protein (1)                                               |                                                                                                                                                                                                                                                                                                                                                                                                                      |                                                                                                                                                                                                                                     | -                               | -                            | P_trifoliata_00122_mRNA_2.1     |
| GF0045851 | 0                            | 0                         | 0                            | 1 Hypothetical protein (1)                                               |                                                                                                                                                                                                                                                                                                                                                                                                                      | Nuclear pre-ribosomal-associated protein 1, N-terminal [IPRO21714] (1)                                                                                                                                                              | -                               | -                            | P_trifoliata_00122_mRNA_18.1    |
| GF0045850 | 0                            | 0                         | 0                            | 1 Polyadenylate-binding protein RBP47 (1)                                | nucleic acid binding [GO:0003676 molecular_function] (1); nucleotide binding [GO:0000166 molecular_function] (1)                                                                                                                                                                                                                                                                                                     | RNA recognition motif domain [IPRO00504] (1); Nucleotide-binding alpha-beta plat domain [IPRO12677] (1)                                                                                                                             | -                               | -                            | P_trifoliata_00122_mRNA_17.1    |
| GF0045849 | 0                            | 0                         | 0                            | 1 Hypothetical protein (1)                                               |                                                                                                                                                                                                                                                                                                                                                                                                                      |                                                                                                                                                                                                                                     | -                               | -                            | P_trifoliata_00121_mRNA_57.1    |
| GF0045848 | 0                            | 0                         | 0                            | 1 RNA polymerase I-specific transcription initiation factor RNS3 (1)     |                                                                                                                                                                                                                                                                                                                                                                                                                      | RNA polymerase I specific transcription initiation factor RNS3 [IPRO07991] (1)                                                                                                                                                      | -                               | -                            | P_trifoliata_00121_mRNA_53.1    |
| GF0045847 | 0                            | 0                         | 0                            | 1 Hypothetical protein (1)                                               |                                                                                                                                                                                                                                                                                                                                                                                                                      |                                                                                                                                                                                                                                     | -                               | -                            | P_trifoliata_00121_mRNA_4.1     |
| GF0045846 | 0                            | 0                         | 0                            | 1 Aspartic proteinase nepenthicin-2 (1)                                  | aspartic-type endopeptidase activity [GO:0004190 molecular_function] (1); proteolysis [GO:0006508 biological_process] (1)                                                                                                                                                                                                                                                                                            | Xylanase inhibitor, N-terminal [IPRO32861] (1); Xylanase inhibitor, C-terminal [IPRO32799] (1); Aspartic peptidase A1 family [IPRO01461] (1); Peptidase family A1 domain [IPRO33121] (1); Aspartic peptidase domain [IPRO21091] (1) | -                               | -                            | P_trifoliata_00121_mRNA_15.1    |
| GF0045845 | 0                            | 0                         | 0                            | 1 Aspartic proteinase nepenthicin-2 (1)                                  | aspartic-type endopeptidase activity [GO:0004190 molecular_function] (1); proteolysis [GO:0006508 biological_process] (1)                                                                                                                                                                                                                                                                                            | Xylanase inhibitor, C-terminal [IPRO32799] (1); Xylanase inhibitor, N-terminal [IPRO32861] (1); Aspartic peptidase A1 family [IPRO01461] (1); Peptidase family A1 domain [IPRO33121] (1); Aspartic peptidase domain [IPRO21091] (1) | -                               | -                            | P_trifoliata_00121_mRNA_13.1    |
| GF0045844 | 0                            | 0                         | 0                            | 1 Aspartic proteinase nepenthicin-2 (1)                                  | aspartic-type endopeptidase activity [GO:0004190 molecular_function] (1); proteolysis [GO:0006508 biological_process] (1)                                                                                                                                                                                                                                                                                            | Aspartic peptidase A1 family [IPRO01461] (1); Xylanase inhibitor, C-terminal [IPRO32799] (1); Xylanase inhibitor, N-terminal [IPRO32861] (1); Peptidase family A1 domain [IPRO33121] (1); Aspartic peptidase domain [IPRO21091] (1) | -                               | -                            | P_trifoliata_00121_mRNA_12.1    |
| GF0045843 | 0                            | 0                         | 0                            | 1 Hypothetical protein (1)                                               | membrane [GO:0016020 cellular_component] (1); DNA-templated transcription, initiation [GO:0006352 biological_process] (1); osmotropic glutamate receptor activity [GO:0004976 molecular_function] (1); nucleus [GO:0005634 cellular_component] (1)                                                                                                                                                                   | transcription initiation factor TFIIID, 23-30kDa subunit [IPRO09323] (1); Iosmotropic glutamate receptor [IPRO01320] (1); Solute-binding protein family 3/N-terminal domain of MBP [IPRO01638] (1)                                  | -                               | -                            | P_trifoliata_00121_mRNA_1.1     |
| GF0045842 | 0                            | 0                         | 0                            | 1 Hypothetical protein (1)                                               |                                                                                                                                                                                                                                                                                                                                                                                                                      | Pentapeptide repeat [IPRO02885] (1)                                                                                                                                                                                                 | -                               | -                            | P_trifoliata_00120_mRNA_59.1    |





| ID       | Num. in <i>C. clementiae</i> | Num. in <i>C. canihii</i> | Num. in <i>P. trifoliata</i> | Note                                                                   | GO                                                                                                                                                                                                                                                                                                                                                                                                                                                                                                                   | InterPro                                                                                                                                                                                                                                                                                                                                           | Members in <i>C. clementiae</i> | Members in <i>C. canihii</i> | Members in <i>P. trifoliata</i> |
|----------|------------------------------|---------------------------|------------------------------|------------------------------------------------------------------------|----------------------------------------------------------------------------------------------------------------------------------------------------------------------------------------------------------------------------------------------------------------------------------------------------------------------------------------------------------------------------------------------------------------------------------------------------------------------------------------------------------------------|----------------------------------------------------------------------------------------------------------------------------------------------------------------------------------------------------------------------------------------------------------------------------------------------------------------------------------------------------|---------------------------------|------------------------------|---------------------------------|
| GF004553 | 0                            | 0                         | 1                            | Hypothetical protein (1)                                               |                                                                                                                                                                                                                                                                                                                                                                                                                                                                                                                      |                                                                                                                                                                                                                                                                                                                                                    | -                               | -                            | P_trifoliata_00115_mRNA_32.1    |
| GF004552 | 0                            | 0                         | 1                            | Hypothetical protein (1)                                               |                                                                                                                                                                                                                                                                                                                                                                                                                                                                                                                      |                                                                                                                                                                                                                                                                                                                                                    | -                               | -                            | P_trifoliata_00115_mRNA_31.1    |
| GF004551 | 0                            | 0                         | 1                            | Hypothetical protein (1)                                               |                                                                                                                                                                                                                                                                                                                                                                                                                                                                                                                      |                                                                                                                                                                                                                                                                                                                                                    | -                               | -                            | P_trifoliata_00115_mRNA_27.1    |
| GF004550 | 0                            | 0                         | 1                            | Hypothetical protein (1)                                               |                                                                                                                                                                                                                                                                                                                                                                                                                                                                                                                      |                                                                                                                                                                                                                                                                                                                                                    | -                               | -                            | P_trifoliata_00115_mRNA_22.1    |
| GF004549 | 0                            | 0                         | 1                            | Hypothetical protein (1)                                               | polysaccharide binding [GO:0030247 molecular_function] (1)                                                                                                                                                                                                                                                                                                                                                                                                                                                           | Wall-associated receptor kinase, galacturonin-binding domain [IPRO25287] (1)                                                                                                                                                                                                                                                                       | -                               | -                            | P_trifoliata_00115_mRNA_21.1    |
| GF004548 | 0                            | 0                         | 1                            | Hypothetical protein (1)                                               |                                                                                                                                                                                                                                                                                                                                                                                                                                                                                                                      |                                                                                                                                                                                                                                                                                                                                                    | -                               | -                            | P_trifoliata_00115_mRNA_20.1    |
| GF004547 | 0                            | 0                         | 1                            | Hypothetical protein (1)                                               |                                                                                                                                                                                                                                                                                                                                                                                                                                                                                                                      |                                                                                                                                                                                                                                                                                                                                                    | -                               | -                            | P_trifoliata_00115_mRNA_10.1    |
| GF004546 | 0                            | 0                         | 1                            | Hypothetical protein (1)                                               |                                                                                                                                                                                                                                                                                                                                                                                                                                                                                                                      |                                                                                                                                                                                                                                                                                                                                                    | -                               | -                            | P_trifoliata_00114_mRNA_74.1    |
| GF004545 | 0                            | 0                         | 1                            | Hypothetical protein (1)                                               |                                                                                                                                                                                                                                                                                                                                                                                                                                                                                                                      | Leucine-rich repeat domain, L domain-like [IPRO12675] (1)                                                                                                                                                                                                                                                                                          | -                               | -                            | P_trifoliata_00114_mRNA_7.1     |
| GF004544 | 0                            | 0                         | 1                            | G-type lectin S-receptor-like serine/threonine-protein kinase RLK1 (1) | protein phosphorylation [GO:0006468 biological_process] (1); protein kinase activity [GO:0004672 molecular_function] (1); ATP binding [GO:0005524 molecular_function] (1)                                                                                                                                                                                                                                                                                                                                            | Protein kinase-like domain [IPRO11009] (1); Protein kinase domain [IPRO00719] (1)                                                                                                                                                                                                                                                                  | -                               | -                            | P_trifoliata_00114_mRNA_68.1    |
| GF004543 | 0                            | 0                         | 1                            | G-type lectin S-receptor-like serine/threonine-protein kinase RLK1 (1) | protein phosphorylation [GO:0006468 biological_process] (1); protein kinase activity [GO:0004672 molecular_function] (1); ATP binding [GO:0005524 molecular_function] (1)                                                                                                                                                                                                                                                                                                                                            | Concanavalin A-like lectin glucanase domain [IPRO13201] (1); Protein kinase-like domain [IPRO11009] (1); Protein kinase domain [IPRO00719] (1); Serine/threonine dual-specificity protein kinase, catalytic domain [IPRO02290] (1); Protein kinase, ATP binding site [IPRO17441] (1); Serine/threonine-protein kinase, active site [IPRO08271] (1) | -                               | -                            | P_trifoliata_00114_mRNA_66.1    |
| GF004542 | 0                            | 0                         | 1                            | Ribosomal protein L11 methyltransferase (1)                            |                                                                                                                                                                                                                                                                                                                                                                                                                                                                                                                      | S-adenosyl-L-methionine-dependent methyltransferase [IPRO29063] (1)                                                                                                                                                                                                                                                                                | -                               | -                            | P_trifoliata_00114_mRNA_6.1     |
| GF004541 | 0                            | 0                         | 1                            | Hypothetical protein (1)                                               | metal ion binding [GO:0046872 molecular_function] (1)                                                                                                                                                                                                                                                                                                                                                                                                                                                                | Zinc finger, CCHC-type [IPRO00571] (1)                                                                                                                                                                                                                                                                                                             | -                               | -                            | P_trifoliata_00114_mRNA_58.1    |
| GF004540 | 0                            | 0                         | 1                            | Hypothetical protein (1)                                               |                                                                                                                                                                                                                                                                                                                                                                                                                                                                                                                      |                                                                                                                                                                                                                                                                                                                                                    | -                               | -                            | P_trifoliata_00114_mRNA_51.1    |
| GF004539 | 0                            | 0                         | 1                            | Hypothetical protein (1)                                               |                                                                                                                                                                                                                                                                                                                                                                                                                                                                                                                      |                                                                                                                                                                                                                                                                                                                                                    | -                               | -                            | P_trifoliata_00114_mRNA_50.1    |
| GF004538 | 0                            | 0                         | 1                            | Hypothetical protein (1)                                               |                                                                                                                                                                                                                                                                                                                                                                                                                                                                                                                      |                                                                                                                                                                                                                                                                                                                                                    | -                               | -                            | P_trifoliata_00114_mRNA_47.1    |
| GF004537 | 0                            | 0                         | 1                            | Hypothetical protein (1)                                               |                                                                                                                                                                                                                                                                                                                                                                                                                                                                                                                      |                                                                                                                                                                                                                                                                                                                                                    | -                               | -                            | P_trifoliata_00114_mRNA_46.1    |
| GF004536 | 0                            | 0                         | 1                            | Hypothetical protein (1)                                               |                                                                                                                                                                                                                                                                                                                                                                                                                                                                                                                      |                                                                                                                                                                                                                                                                                                                                                    | -                               | -                            | P_trifoliata_00114_mRNA_45.1    |
| GF004535 | 0                            | 0                         | 1                            | Hypothetical protein (1)                                               |                                                                                                                                                                                                                                                                                                                                                                                                                                                                                                                      |                                                                                                                                                                                                                                                                                                                                                    | -                               | -                            | P_trifoliata_00114_mRNA_44.1    |
| GF004534 | 0                            | 0                         | 1                            | Hypothetical protein (1)                                               |                                                                                                                                                                                                                                                                                                                                                                                                                                                                                                                      |                                                                                                                                                                                                                                                                                                                                                    | -                               | -                            | P_trifoliata_00114_mRNA_37.1    |
| GF004533 | 0                            | 0                         | 1                            | Putative mDR family transposase-like (1)                               |                                                                                                                                                                                                                                                                                                                                                                                                                                                                                                                      | Transposase, MuDR, plant [IPRO04332] (1); MULE transposase domain [IPRO18289] (1)                                                                                                                                                                                                                                                                  | -                               | -                            | P_trifoliata_00114_mRNA_33.1    |
| GF004532 | 0                            | 0                         | 1                            | Protein yjyee-like Af553940 (1)                                        |                                                                                                                                                                                                                                                                                                                                                                                                                                                                                                                      | Yjyee/Ms18 [IPRO04910] (1)                                                                                                                                                                                                                                                                                                                         | -                               | -                            | P_trifoliata_00114_mRNA_29.1    |
| GF004531 | 0                            | 0                         | 1                            | Hypothetical protein (1)                                               |                                                                                                                                                                                                                                                                                                                                                                                                                                                                                                                      |                                                                                                                                                                                                                                                                                                                                                    | -                               | -                            | P_trifoliata_00114_mRNA_25.1    |
| GF004530 | 0                            | 0                         | 1                            | Hypothetical protein (1)                                               |                                                                                                                                                                                                                                                                                                                                                                                                                                                                                                                      |                                                                                                                                                                                                                                                                                                                                                    | -                               | -                            | P_trifoliata_00114_mRNA_24.1    |
| GF004529 | 0                            | 0                         | 1                            | Hypothetical protein (1)                                               |                                                                                                                                                                                                                                                                                                                                                                                                                                                                                                                      |                                                                                                                                                                                                                                                                                                                                                    | -                               | -                            | P_trifoliata_00114_mRNA_2.1     |
| GF004528 | 0                            | 0                         | 1                            | Hypothetical protein (1)                                               |                                                                                                                                                                                                                                                                                                                                                                                                                                                                                                                      | HAD-like domain [IPRO23214] (1); P-type ATPase, phosphorylation site [IPRO18303] (1)                                                                                                                                                                                                                                                               | -                               | -                            | P_trifoliata_00114_mRNA_18.1    |
| GF004527 | 0                            | 0                         | 1                            | Ribosomal protein L11 methyltransferase (1)                            |                                                                                                                                                                                                                                                                                                                                                                                                                                                                                                                      | S-adenosyl-L-methionine-dependent methyltransferase [IPRO29063] (1)                                                                                                                                                                                                                                                                                | -                               | -                            | P_trifoliata_00114_mRNA_11.1    |
| GF004526 | 0                            | 0                         | 1                            | Hypothetical protein (1)                                               |                                                                                                                                                                                                                                                                                                                                                                                                                                                                                                                      |                                                                                                                                                                                                                                                                                                                                                    | -                               | -                            | P_trifoliata_00113_mRNA_8.1     |
| GF004525 | 0                            | 0                         | 1                            | Hypothetical protein (1)                                               |                                                                                                                                                                                                                                                                                                                                                                                                                                                                                                                      |                                                                                                                                                                                                                                                                                                                                                    | -                               | -                            | P_trifoliata_00113_mRNA_7.1     |
| GF004524 | 0                            | 0                         | 1                            | Hypothetical protein (1)                                               |                                                                                                                                                                                                                                                                                                                                                                                                                                                                                                                      |                                                                                                                                                                                                                                                                                                                                                    | -                               | -                            | P_trifoliata_00113_mRNA_58.1    |
| GF004523 | 0                            | 0                         | 1                            | Hypothetical protein (1)                                               | integral component of membrane [GO:0016021 cellular_component] (1); transmembrane transporter activity [GO:0022857 molecular_function] (1)                                                                                                                                                                                                                                                                                                                                                                           | WAT1-related protein [IPRO30184] (1)                                                                                                                                                                                                                                                                                                               | -                               | -                            | P_trifoliata_00113_mRNA_40.1    |
| GF004522 | 0                            | 0                         | 1                            | Hypothetical protein (1)                                               |                                                                                                                                                                                                                                                                                                                                                                                                                                                                                                                      |                                                                                                                                                                                                                                                                                                                                                    | -                               | -                            | P_trifoliata_00113_mRNA_34.1    |
| GF004521 | 0                            | 0                         | 1                            | Putative potassium transporter 8 (1)                                   | membrane [GO:0016020 cellular_component] (1); potassium ion transmembrane transport [GO:0071805 biological_process] (1); potassium ion transmembrane transporter activity [GO:0015079 molecular_function] (1)                                                                                                                                                                                                                                                                                                        | Potassium transporter [IPRO03855] (1)                                                                                                                                                                                                                                                                                                              | -                               | -                            | P_trifoliata_00113_mRNA_26.1    |
| GF004520 | 0                            | 0                         | 1                            | Hypothetical protein (1)                                               | catalytic step 2 spliceosome [GO:0071013 cellular_component] (1); mRNA splicing, via spliceosome [GO:000398 biological_process] (1); catalytic activity [GO:0003824 molecular_function] (1); protein binding [GO:0005515 molecular_function] (1); iron-sulfur cluster binding [GO:0051536 molecular_function] (1)                                                                                                                                                                                                    | HD domain [IPRO66674] (1); Pre-mRNA processing factor 17 [IPRO23847] (1); WD40-repeat-containing domain [IPRO17986] (1); WD40 repeat [IPRO1680] (1); HD-PfIase domain [IPRO05607] (1); Radical SAM [IPRO07197] (1); WD40 repeat, conserved site [IPRO19775] (1); WD40/YVTN repeat-like-containing domain [IPRO15943] (1)                           | -                               | -                            | P_trifoliata_00113_mRNA_13.1    |
| GF004519 | 0                            | 0                         | 1                            | Hypothetical protein (1)                                               | regulation of transcription, DNA-templated [GO:0006355 biological_process] (1); nucleic acid binding [GO:0003676 molecular_function] (1)                                                                                                                                                                                                                                                                                                                                                                             | Carlivrus nucleic acid-binding protein [IPRO02568] (1)                                                                                                                                                                                                                                                                                             | -                               | -                            | P_trifoliata_00113_mRNA_12.1    |
| GF004518 | 0                            | 0                         | 1                            | Hypothetical protein (1)                                               |                                                                                                                                                                                                                                                                                                                                                                                                                                                                                                                      |                                                                                                                                                                                                                                                                                                                                                    | -                               | -                            | P_trifoliata_00113_mRNA_1.1     |
| GF004517 | 0                            | 0                         | 1                            | Hypothetical protein (1)                                               |                                                                                                                                                                                                                                                                                                                                                                                                                                                                                                                      |                                                                                                                                                                                                                                                                                                                                                    | -                               | -                            | P_trifoliata_00112_mRNA_8.1     |
| GF004516 | 0                            | 0                         | 1                            | Hypothetical protein (1)                                               |                                                                                                                                                                                                                                                                                                                                                                                                                                                                                                                      |                                                                                                                                                                                                                                                                                                                                                    | -                               | -                            | P_trifoliata_00112_mRNA_60.1    |
| GF004515 | 0                            | 0                         | 1                            | Hypothetical protein (1)                                               |                                                                                                                                                                                                                                                                                                                                                                                                                                                                                                                      |                                                                                                                                                                                                                                                                                                                                                    | -                               | -                            | P_trifoliata_00112_mRNA_45.1    |
| GF004514 | 0                            | 0                         | 1                            | Hypothetical protein (1)                                               |                                                                                                                                                                                                                                                                                                                                                                                                                                                                                                                      |                                                                                                                                                                                                                                                                                                                                                    | -                               | -                            | P_trifoliata_00112_mRNA_42.1    |
| GF004513 | 0                            | 0                         | 1                            | Hypothetical protein (1)                                               |                                                                                                                                                                                                                                                                                                                                                                                                                                                                                                                      |                                                                                                                                                                                                                                                                                                                                                    | -                               | -                            | P_trifoliata_00112_mRNA_39.1    |
| GF004512 | 0                            | 0                         | 1                            | Hypothetical protein (1)                                               |                                                                                                                                                                                                                                                                                                                                                                                                                                                                                                                      |                                                                                                                                                                                                                                                                                                                                                    | -                               | -                            | P_trifoliata_00112_mRNA_38.1    |
| GF004511 | 0                            | 0                         | 1                            | Hypothetical protein (1)                                               |                                                                                                                                                                                                                                                                                                                                                                                                                                                                                                                      |                                                                                                                                                                                                                                                                                                                                                    | -                               | -                            | P_trifoliata_00112_mRNA_36.1    |
| GF004510 | 0                            | 0                         | 1                            | Hypothetical protein (1)                                               |                                                                                                                                                                                                                                                                                                                                                                                                                                                                                                                      |                                                                                                                                                                                                                                                                                                                                                    | -                               | -                            | P_trifoliata_00112_mRNA_27.1    |
| GF004509 | 0                            | 0                         | 1                            | Hypothetical protein (1)                                               |                                                                                                                                                                                                                                                                                                                                                                                                                                                                                                                      |                                                                                                                                                                                                                                                                                                                                                    | -                               | -                            | P_trifoliata_00112_mRNA_18.1    |
| GF004508 | 0                            | 0                         | 1                            | Hypothetical protein (1)                                               |                                                                                                                                                                                                                                                                                                                                                                                                                                                                                                                      |                                                                                                                                                                                                                                                                                                                                                    | -                               | -                            | P_trifoliata_00112_mRNA_17.1    |
| GF004507 | 0                            | 0                         | 1                            | Hypothetical protein (1)                                               |                                                                                                                                                                                                                                                                                                                                                                                                                                                                                                                      |                                                                                                                                                                                                                                                                                                                                                    | -                               | -                            | P_trifoliata_00112_mRNA_14.1    |
| GF004506 | 0                            | 0                         | 1                            | Phospholipase, patatin family (1)                                      | metabolic process [GO:0008152 biological_process] (1); lipid metabolic process [GO:0006629 biological_process] (1)                                                                                                                                                                                                                                                                                                                                                                                                   | Patatin/Phospholipase A2-related [IPRO2641] (1); Acyl transferase/acyl hydrolase/lysophospholipase [IPRO16035] (1)                                                                                                                                                                                                                                 | -                               | -                            | P_trifoliata_00112_mRNA_1.1     |
| GF004505 | 0                            | 0                         | 1                            | Hypothetical protein (1)                                               |                                                                                                                                                                                                                                                                                                                                                                                                                                                                                                                      |                                                                                                                                                                                                                                                                                                                                                    | -                               | -                            | P_trifoliata_00111_mRNA_9.1     |
| GF004504 | 0                            | 0                         | 1                            | Hypothetical protein (1)                                               |                                                                                                                                                                                                                                                                                                                                                                                                                                                                                                                      |                                                                                                                                                                                                                                                                                                                                                    | -                               | -                            | P_trifoliata_00111_mRNA_8.1     |
| GF004503 | 0                            | 0                         | 1                            | Hypothetical protein (1)                                               |                                                                                                                                                                                                                                                                                                                                                                                                                                                                                                                      |                                                                                                                                                                                                                                                                                                                                                    | -                               | -                            | P_trifoliata_00111_mRNA_74.1    |
| GF004502 | 0                            | 0                         | 1                            | Hypothetical protein (1)                                               | zinc ion binding [GO:0008270 molecular_function] (1); nucleic acid binding [GO:0003676 molecular_function] (1)                                                                                                                                                                                                                                                                                                                                                                                                       | Zinc finger, CCHC-type [IPRO01878] (1)                                                                                                                                                                                                                                                                                                             | -                               | -                            | P_trifoliata_00111_mRNA_7.1     |
| GF004501 | 0                            | 0                         | 1                            | Hypothetical protein (1)                                               |                                                                                                                                                                                                                                                                                                                                                                                                                                                                                                                      |                                                                                                                                                                                                                                                                                                                                                    | -                               | -                            | P_trifoliata_00111_mRNA_6.1     |
| GF004500 | 0                            | 0                         | 1                            | Hypothetical protein (1)                                               | protein folding [GO:0006457 biological_process] (1); unfolded protein binding [GO:0051082 molecular_function] (1); catalytic activity [GO:0005524 molecular_function] (1)                                                                                                                                                                                                                                                                                                                                            | Chaperonin TCP-1, conserved site [IPRO02194] (1); Chaperone tailless complex polypeptide 1 (TCP-1) [IPRO17998] (1); Chaperonin Cpn60/TCP-1 family [IPRO02421] (1); GroEL-like equatorial domain [IPRO27413] (1)                                                                                                                                    | -                               | -                            | P_trifoliata_00111_mRNA_57.1    |
| GF004499 | 0                            | 0                         | 1                            | Hypothetical protein (1)                                               | oxidoreductase activity, acting on the CH-OH group of donors, NAD or NADP as acceptor [GO:001616 biological_function] (1); malate metabolic process [GO:0006108 biological_process] (1); oxidation-reduction process [GO:005514 biological_process] (1); oxidoreductase activity [GO:0016491 molecular_function] (1); malate dehydrogenase activity [GO:00016615 molecular_function] (1); carbohydrate metabolic process [GO:0005975 biological_process] (1); catalytic activity [GO:0003824 molecular_function] (1) | Malate dehydrogenase, type 2 [IPRO10945] (1); Lactate dehydrogenase/glyoxylate hydratase, family 4, C-terminal [IPRO15955] (1); NAD(P)-binding domain [IPRO16040] (1); Lactate/malate dehydrogenase, N-terminal [IPRO01236] (1)                                                                                                                    | -                               | -                            | P_trifoliata_00111_mRNA_50.1    |
| GF004497 | 0                            | 0                         | 1                            | Hypothetical protein (1)                                               | proteolysis [GO:0006508 biological_process] (1); aspartic-type endopeptidase activity [GO:0004190 molecular_function] (1)                                                                                                                                                                                                                                                                                                                                                                                            | Aspartic peptidase, active site [IPRO01969] (1)                                                                                                                                                                                                                                                                                                    | -                               | -                            | P_trifoliata_00111_mRNA_5.1     |
| GF004496 | 0                            | 0                         | 1                            | Hypothetical protein (1)                                               |                                                                                                                                                                                                                                                                                                                                                                                                                                                                                                                      |                                                                                                                                                                                                                                                                                                                                                    | -                               | -                            | P_trifoliata_00111_mRNA_31.1    |
| GF004495 | 0                            | 0                         | 1                            | Hypothetical protein (1)                                               |                                                                                                                                                                                                                                                                                                                                                                                                                                                                                                                      |                                                                                                                                                                                                                                                                                                                                                    | -                               | -                            | P_trifoliata_00111_mRNA_3.1     |
| GF004494 | 0                            | 0                         | 1                            | Hypothetical protein (1)                                               |                                                                                                                                                                                                                                                                                                                                                                                                                                                                                                                      |                                                                                                                                                                                                                                                                                                                                                    | -                               | -                            | P_trifoliata_00111_mRNA_2.1     |
| GF004493 | 0                            | 0                         | 1                            | Hypothetical protein (1)                                               |                                                                                                                                                                                                                                                                                                                                                                                                                                                                                                                      |                                                                                                                                                                                                                                                                                                                                                    | -                               | -                            | P_trifoliata_00110_mRNA_6.1     |
| GF004492 | 0                            | 0                         | 1                            | Hypothetical protein (1)                                               |                                                                                                                                                                                                                                                                                                                                                                                                                                                                                                                      |                                                                                                                                                                                                                                                                                                                                                    | -                               | -                            | P_trifoliata_00110_mRNA_52.1    |
| GF004491 | 0                            | 0                         | 1                            | Hypothetical protein (1)                                               |                                                                                                                                                                                                                                                                                                                                                                                                                                                                                                                      | Viral movement protein [IPRO28919] (1)                                                                                                                                                                                                                                                                                                             | -                               | -                            | P_trifoliata_00110_mRNA_5.1     |
| GF004490 | 0                            | 0                         | 1                            | Hypothetical protein (1)                                               |                                                                                                                                                                                                                                                                                                                                                                                                                                                                                                                      |                                                                                                                                                                                                                                                                                                                                                    | -                               | -                            | P_trifoliata_00110_mRNA_5.1     |
| GF004489 | 0                            | 0                         | 1                            | Putative alcohol dehydrogenase superfamily protein (1)                 | zinc ion binding [GO:0008270 molecular_function] (1); oxidation-reduction process [GO:005514 biological_process] (1); oxidoreductase activity [GO:0016491 molecular_function] (1)                                                                                                                                                                                                                                                                                                                                    | Alcohol dehydrogenase superfamily, zinc-type [IPRO02855] (1); Alcohol dehydrogenase, N-terminal [IPRO13154] (1); Polyketide synthase, enoylreductase domain [IPRO03643] (1); GroES-like [IPRO1032] (1)                                                                                                                                             | -                               | -                            | P_trifoliata_00110_mRNA_49.1    |
| GF004488 | 0                            | 0                         | 1                            | Hypothetical protein (1)                                               |                                                                                                                                                                                                                                                                                                                                                                                                                                                                                                                      |                                                                                                                                                                                                                                                                                                                                                    | -                               | -                            | P_trifoliata_00110_mRNA_47.1    |

| ID        | Num. in <i>C. caryocarpae</i> | Num. in <i>C. auris</i> | Num. in <i>P. trichosporium</i> | Note                                                          | GO                                                                                                                                                                                                                                                                                                                                                                                                                                                                                                                                                                        | InterPro                                                                                                                                                                | Members in <i>C. caryocarpae</i> | Members in <i>C. auris</i> | Members in <i>P. trichosporium</i> |
|-----------|-------------------------------|-------------------------|---------------------------------|---------------------------------------------------------------|---------------------------------------------------------------------------------------------------------------------------------------------------------------------------------------------------------------------------------------------------------------------------------------------------------------------------------------------------------------------------------------------------------------------------------------------------------------------------------------------------------------------------------------------------------------------------|-------------------------------------------------------------------------------------------------------------------------------------------------------------------------|----------------------------------|----------------------------|------------------------------------|
| GF0045487 | 0                             | 0                       | 1                               | Hypothetical protein (1)                                      |                                                                                                                                                                                                                                                                                                                                                                                                                                                                                                                                                                           |                                                                                                                                                                         |                                  |                            | P_trifoliata_0010_mRNA_46.1        |
| GF0045486 | 0                             | 0                       | 1                               | Hypothetical protein (1)                                      | regulation of transcription, DNA-templated [GO:0006355]; biological_process (1); nucleic acid binding [GO:0003676]; molecular_function (1)                                                                                                                                                                                                                                                                                                                                                                                                                                | Carlarvirus nucleic acid-binding protein [IPR02568] (1)                                                                                                                 |                                  |                            | P_trifoliata_0010_mRNA_44.1        |
| GF0045485 | 0                             | 0                       | 1                               | Hypothetical protein (1)                                      |                                                                                                                                                                                                                                                                                                                                                                                                                                                                                                                                                                           |                                                                                                                                                                         |                                  |                            | P_trifoliata_0010_mRNA_42.1        |
| GF0045484 | 0                             | 0                       | 1                               | Hypothetical protein (1)                                      |                                                                                                                                                                                                                                                                                                                                                                                                                                                                                                                                                                           |                                                                                                                                                                         |                                  |                            | P_trifoliata_0010_mRNA_41.1        |
| GF0045483 | 0                             | 0                       | 1                               | Hypothetical protein (1)                                      |                                                                                                                                                                                                                                                                                                                                                                                                                                                                                                                                                                           |                                                                                                                                                                         |                                  |                            | P_trifoliata_0010_mRNA_40.1        |
| GF0045482 | 0                             | 0                       | 1                               | Gag protease polyprotein (1)                                  |                                                                                                                                                                                                                                                                                                                                                                                                                                                                                                                                                                           | Retrotransposon gag domain [IPR005162] (1)                                                                                                                              |                                  |                            | P_trifoliata_0010_mRNA_39.1        |
| GF0045481 | 0                             | 0                       | 1                               | Hypothetical protein (1)                                      |                                                                                                                                                                                                                                                                                                                                                                                                                                                                                                                                                                           | Profilin-like domain [IPR008502] (1)                                                                                                                                    |                                  |                            | P_trifoliata_0010_mRNA_38.1        |
| GF0045480 | 0                             | 0                       | 1                               | Hypothetical protein (1)                                      |                                                                                                                                                                                                                                                                                                                                                                                                                                                                                                                                                                           | Triphosphatase/inositolase/phosphatase [IPR005135] (1)                                                                                                                  |                                  |                            | P_trifoliata_0010_mRNA_36.1        |
| GF0045479 | 0                             | 0                       | 1                               | Hypothetical protein (1)                                      |                                                                                                                                                                                                                                                                                                                                                                                                                                                                                                                                                                           |                                                                                                                                                                         |                                  |                            | P_trifoliata_0010_mRNA_35.1        |
| GF0045478 | 0                             | 0                       | 1                               | Hypothetical protein (1)                                      |                                                                                                                                                                                                                                                                                                                                                                                                                                                                                                                                                                           |                                                                                                                                                                         |                                  |                            | P_trifoliata_0010_mRNA_34.1        |
| GF0045477 | 0                             | 0                       | 1                               | Hypothetical protein (1)                                      |                                                                                                                                                                                                                                                                                                                                                                                                                                                                                                                                                                           |                                                                                                                                                                         |                                  |                            | P_trifoliata_0010_mRNA_32.1        |
| GF0045476 | 0                             | 0                       | 1                               | Hypothetical protein (1)                                      |                                                                                                                                                                                                                                                                                                                                                                                                                                                                                                                                                                           |                                                                                                                                                                         |                                  |                            | P_trifoliata_0010_mRNA_28.1        |
| GF0045475 | 0                             | 0                       | 1                               | Hypothetical protein (1)                                      |                                                                                                                                                                                                                                                                                                                                                                                                                                                                                                                                                                           |                                                                                                                                                                         |                                  |                            | P_trifoliata_0010_mRNA_25.1        |
| GF0045474 | 0                             | 0                       | 1                               | Hypothetical protein (1)                                      |                                                                                                                                                                                                                                                                                                                                                                                                                                                                                                                                                                           |                                                                                                                                                                         |                                  |                            | P_trifoliata_0010_mRNA_23.1        |
| GF0045473 | 0                             | 0                       | 1                               | Hypothetical protein (1)                                      |                                                                                                                                                                                                                                                                                                                                                                                                                                                                                                                                                                           |                                                                                                                                                                         |                                  |                            | P_trifoliata_0010_mRNA_2.1         |
| GF0045472 | 0                             | 0                       | 1                               | Hypothetical protein (1)                                      |                                                                                                                                                                                                                                                                                                                                                                                                                                                                                                                                                                           |                                                                                                                                                                         |                                  |                            | P_trifoliata_0010_mRNA_18.1        |
| GF0045471 | 0                             | 0                       | 1                               | Hypothetical protein (1)                                      |                                                                                                                                                                                                                                                                                                                                                                                                                                                                                                                                                                           |                                                                                                                                                                         |                                  |                            | P_trifoliata_0010_mRNA_17.1        |
| GF0045470 | 0                             | 0                       | 1                               | Hypothetical protein (1)                                      |                                                                                                                                                                                                                                                                                                                                                                                                                                                                                                                                                                           |                                                                                                                                                                         |                                  |                            | P_trifoliata_0010_mRNA_15.1        |
| GF0045469 | 0                             | 0                       | 1                               | Hypothetical protein (1)                                      |                                                                                                                                                                                                                                                                                                                                                                                                                                                                                                                                                                           | MULE transposase domain [IPR018289] (1)                                                                                                                                 |                                  |                            | P_trifoliata_0010_mRNA_14.1        |
| GF0045468 | 0                             | 0                       | 1                               | Hypothetical protein (1)                                      |                                                                                                                                                                                                                                                                                                                                                                                                                                                                                                                                                                           |                                                                                                                                                                         |                                  |                            | P_trifoliata_00109_mRNA_72.1       |
| GF0045467 | 0                             | 0                       | 1                               | Hypothetical protein (1)                                      |                                                                                                                                                                                                                                                                                                                                                                                                                                                                                                                                                                           |                                                                                                                                                                         |                                  |                            | P_trifoliata_00109_mRNA_69.1       |
| GF0045466 | 0                             | 0                       | 1                               | Putative phorbol ester / diacylglycerol binding protein (1)   | protein binding [GO:0005515]; molecular_function (1); zinc ion binding [GO:0008270]; molecular_function (1)                                                                                                                                                                                                                                                                                                                                                                                                                                                               | Zinc finger, PHD-type [IPR01965] (1); Zinc finger, RING/VEPHD-type [IPR013083] (1); Zinc finger, PHD-finger [IPR019787] (1); Zinc finger, FYVE-PHD-type [IPR011011] (1) |                                  |                            | P_trifoliata_00109_mRNA_57.1       |
| GF0045465 | 0                             | 0                       | 1                               | Galactosyltransferase family protein isoform 2 (1)            | galactosyltransferase activity [GO:0008378]; molecular_function (1); membrane [GO:0001602]; cellular_component (1); protein glycosylation [GO:0006486]; biological_process (1)                                                                                                                                                                                                                                                                                                                                                                                            | Domain of unknown function DUF4094 [IPR025298] (1); Glycosyl transferase, family 31 [IPR02659] (1)                                                                      |                                  |                            | P_trifoliata_00109_mRNA_53.1       |
| GF0045464 | 0                             | 0                       | 1                               | Hypothetical protein (1)                                      |                                                                                                                                                                                                                                                                                                                                                                                                                                                                                                                                                                           |                                                                                                                                                                         |                                  |                            | P_trifoliata_00109_mRNA_31.1       |
| GF0045463 | 0                             | 0                       | 1                               | Hypothetical protein (1)                                      |                                                                                                                                                                                                                                                                                                                                                                                                                                                                                                                                                                           |                                                                                                                                                                         |                                  |                            | P_trifoliata_00109_mRNA_20.1       |
| GF0045462 | 0                             | 0                       | 1                               | 2,3-bisphosphoglycerate-dependent phosphoglycerate mutase (1) | glycolytic process [GO:0006096]; biological_process (1); phosphoglycerate mutase activity [GO:0004619]; molecular_function (1); catalytic activity [GO:0003824]; molecular_function (1); intramolecular transferase activity, phosphotransferases [GO:0016868]; molecular_function (1); metabolic process [GO:0008152]; biological_process (1)                                                                                                                                                                                                                            | Phosphoglycerate mutase 1 [IPR005952] (1); Histidine phosphatase superfamily, clade-1 [IPR013078] (1); Superfamily phosphoglycerate mutase, active site [IPR01345] (1)  |                                  |                            | P_trifoliata_00109_mRNA_16.1       |
| GF0045461 | 0                             | 0                       | 1                               | Hypothetical protein (1)                                      |                                                                                                                                                                                                                                                                                                                                                                                                                                                                                                                                                                           |                                                                                                                                                                         |                                  |                            | P_trifoliata_00109_mRNA_14.1       |
| GF0045460 | 0                             | 0                       | 1                               | Hypothetical protein (1)                                      |                                                                                                                                                                                                                                                                                                                                                                                                                                                                                                                                                                           |                                                                                                                                                                         |                                  |                            | P_trifoliata_00109_mRNA_13.1       |
| GF0045459 | 0                             | 0                       | 1                               | Hypothetical protein (1)                                      | hydrolase activity, hydrolyzing O-glycosyl compounds [GO:0004553]; molecular_function (1)                                                                                                                                                                                                                                                                                                                                                                                                                                                                                 | Fibronectin type III-like domain [IPR026891] (1); Glycoside hydrolase family 3 [IPR026892] (1)                                                                          |                                  |                            | P_trifoliata_00109_mRNA_11.1       |
| GF0045458 | 0                             | 0                       | 1                               | Hypothetical protein (1)                                      |                                                                                                                                                                                                                                                                                                                                                                                                                                                                                                                                                                           |                                                                                                                                                                         |                                  |                            | P_trifoliata_00108_mRNA_66.1       |
| GF0045457 | 0                             | 0                       | 1                               | Hypothetical protein (1)                                      |                                                                                                                                                                                                                                                                                                                                                                                                                                                                                                                                                                           |                                                                                                                                                                         |                                  |                            | P_trifoliata_00108_mRNA_65.1       |
| GF0045456 | 0                             | 0                       | 1                               | Hypothetical protein (1)                                      |                                                                                                                                                                                                                                                                                                                                                                                                                                                                                                                                                                           |                                                                                                                                                                         |                                  |                            | P_trifoliata_00108_mRNA_63.1       |
| GF0045455 | 0                             | 0                       | 1                               | Hypothetical protein (1)                                      |                                                                                                                                                                                                                                                                                                                                                                                                                                                                                                                                                                           |                                                                                                                                                                         |                                  |                            | P_trifoliata_00108_mRNA_62.1       |
| GF0045454 | 0                             | 0                       | 1                               | Hypothetical protein (1)                                      |                                                                                                                                                                                                                                                                                                                                                                                                                                                                                                                                                                           |                                                                                                                                                                         |                                  |                            | P_trifoliata_00108_mRNA_61.1       |
| GF0045453 | 0                             | 0                       | 1                               | Hypothetical protein (1)                                      | zinc ion binding [GO:0008270]; molecular_function (1); nucleic acid binding [GO:0003676]; molecular_function (1)                                                                                                                                                                                                                                                                                                                                                                                                                                                          | Zinc finger, CCHC-type [IPR01878] (1)                                                                                                                                   |                                  |                            | P_trifoliata_00108_mRNA_58.1       |
| GF0045452 | 0                             | 0                       | 1                               | Hypothetical protein (1)                                      |                                                                                                                                                                                                                                                                                                                                                                                                                                                                                                                                                                           |                                                                                                                                                                         |                                  |                            | P_trifoliata_00108_mRNA_57.1       |
| GF0045451 | 0                             | 0                       | 1                               | Hypothetical protein (1)                                      |                                                                                                                                                                                                                                                                                                                                                                                                                                                                                                                                                                           | Viral movement protein [IPR028919] (1)                                                                                                                                  |                                  |                            | P_trifoliata_00108_mRNA_56.1       |
| GF0045450 | 0                             | 0                       | 1                               | Hypothetical protein (1)                                      |                                                                                                                                                                                                                                                                                                                                                                                                                                                                                                                                                                           |                                                                                                                                                                         |                                  |                            | P_trifoliata_00108_mRNA_54.1       |
| GF0045449 | 0                             | 0                       | 1                               | Hypothetical protein (1)                                      |                                                                                                                                                                                                                                                                                                                                                                                                                                                                                                                                                                           |                                                                                                                                                                         |                                  |                            | P_trifoliata_00108_mRNA_49.1       |
| GF0045448 | 0                             | 0                       | 1                               | Hypothetical protein (1)                                      |                                                                                                                                                                                                                                                                                                                                                                                                                                                                                                                                                                           |                                                                                                                                                                         |                                  |                            | P_trifoliata_00108_mRNA_48.1       |
| GF0045447 | 0                             | 0                       | 1                               | Hypothetical protein (1)                                      |                                                                                                                                                                                                                                                                                                                                                                                                                                                                                                                                                                           |                                                                                                                                                                         |                                  |                            | P_trifoliata_00108_mRNA_47.1       |
| GF0045446 | 0                             | 0                       | 1                               | Hypothetical protein (1)                                      |                                                                                                                                                                                                                                                                                                                                                                                                                                                                                                                                                                           | Dynamins superfamily [IPR022812] (1)                                                                                                                                    |                                  |                            | P_trifoliata_00108_mRNA_46.1       |
| GF0045445 | 0                             | 0                       | 1                               | Hypothetical protein (1)                                      |                                                                                                                                                                                                                                                                                                                                                                                                                                                                                                                                                                           |                                                                                                                                                                         |                                  |                            | P_trifoliata_00108_mRNA_42.1       |
| GF0045444 | 0                             | 0                       | 1                               | Hypothetical protein (1)                                      |                                                                                                                                                                                                                                                                                                                                                                                                                                                                                                                                                                           | Reverse transcriptase, RNA-dependent DNA polymerase [IPR013103] (1)                                                                                                     |                                  |                            | P_trifoliata_00108_mRNA_40.1       |
| GF0045443 | 0                             | 0                       | 1                               | Hypothetical protein (1)                                      |                                                                                                                                                                                                                                                                                                                                                                                                                                                                                                                                                                           |                                                                                                                                                                         |                                  |                            | P_trifoliata_00108_mRNA_37.1       |
| GF0045442 | 0                             | 0                       | 1                               | Hypothetical protein (1)                                      |                                                                                                                                                                                                                                                                                                                                                                                                                                                                                                                                                                           |                                                                                                                                                                         |                                  |                            | P_trifoliata_00108_mRNA_36.1       |
| GF0045441 | 0                             | 0                       | 1                               | Hypothetical protein (1)                                      |                                                                                                                                                                                                                                                                                                                                                                                                                                                                                                                                                                           | LOG family [IPR031100] (1)                                                                                                                                              |                                  |                            | P_trifoliata_00108_mRNA_33.1       |
| GF0045440 | 0                             | 0                       | 1                               | Hypothetical protein (1)                                      |                                                                                                                                                                                                                                                                                                                                                                                                                                                                                                                                                                           |                                                                                                                                                                         |                                  |                            | P_trifoliata_00108_mRNA_32.1       |
| GF0045439 | 0                             | 0                       | 1                               | O-acyltransferase WSD1 (1)                                    | diacylglycerol O-acyltransferase activity [GO:0004144]; molecular_function (1)                                                                                                                                                                                                                                                                                                                                                                                                                                                                                            | O-acyltransferase WSD1, C-terminal domain [IPR009721] (1)                                                                                                               |                                  |                            | P_trifoliata_00108_mRNA_31.1       |
| GF0045438 | 0                             | 0                       | 1                               | Hypothetical protein (1)                                      |                                                                                                                                                                                                                                                                                                                                                                                                                                                                                                                                                                           |                                                                                                                                                                         |                                  |                            | P_trifoliata_00108_mRNA_30.1       |
| GF0045437 | 0                             | 0                       | 1                               | Hypothetical protein (1)                                      |                                                                                                                                                                                                                                                                                                                                                                                                                                                                                                                                                                           | Pentatricopeptide repeat [IPR002885] (1)                                                                                                                                |                                  |                            | P_trifoliata_00108_mRNA_27.1       |
| GF0045436 | 0                             | 0                       | 1                               | Hypothetical protein (1)                                      |                                                                                                                                                                                                                                                                                                                                                                                                                                                                                                                                                                           |                                                                                                                                                                         |                                  |                            | P_trifoliata_00108_mRNA_26.1       |
| GF0045435 | 0                             | 0                       | 1                               | Hypothetical protein (1)                                      |                                                                                                                                                                                                                                                                                                                                                                                                                                                                                                                                                                           |                                                                                                                                                                         |                                  |                            | P_trifoliata_00108_mRNA_23.1       |
| GF0045434 | 0                             | 0                       | 1                               | Hypothetical protein (1)                                      |                                                                                                                                                                                                                                                                                                                                                                                                                                                                                                                                                                           |                                                                                                                                                                         |                                  |                            | P_trifoliata_00108_mRNA_21.1       |
| GF0045433 | 0                             | 0                       | 1                               | Hypothetical protein (1)                                      | transport [GO:0006810]; biological_process (1); integral component of membrane [GO:0016021]; cellular_component (1); ATPase activity [GO:0016887]; molecular_function (1); hydrolase activity [GO:0016787]; molecular_function (1); ATP binding [GO:0005524]; molecular_function (1); cytoplasm [GO:0005737]; cellular_component (1); transmembrane transport [GO:0055085]; biological_process (1); protein catabolic process [GO:0003016]; biological_process (1); ATPase activity, coupled to transmembrane movement of substances [GO:0042626]; molecular_function (1) | Cytochrome P450 [IPR001128] (1); Cytochrome P450, conserved site [IPR017972] (1); Cytochrome P450, E-class, group 1 [IPR02401] (1)                                      |                                  |                            | P_trifoliata_00108_mRNA_18.1       |
| GF0045432 | 0                             | 0                       | 1                               | Hypothetical protein (1)                                      |                                                                                                                                                                                                                                                                                                                                                                                                                                                                                                                                                                           | Mitochondrial carrier domain [IPR023395] (1)                                                                                                                            |                                  |                            | P_trifoliata_00108_mRNA_12.1       |
| GF0045431 | 0                             | 0                       | 1                               | Hypothetical protein (1)                                      |                                                                                                                                                                                                                                                                                                                                                                                                                                                                                                                                                                           |                                                                                                                                                                         |                                  |                            | P_trifoliata_00107_mRNA_9.1        |
| GF0045430 | 0                             | 0                       | 1                               | Hypothetical protein (1)                                      |                                                                                                                                                                                                                                                                                                                                                                                                                                                                                                                                                                           |                                                                                                                                                                         |                                  |                            | P_trifoliata_00107_mRNA_67.1       |
| GF0045429 | 0                             | 0                       | 1                               | Hypothetical protein (1)                                      |                                                                                                                                                                                                                                                                                                                                                                                                                                                                                                                                                                           |                                                                                                                                                                         |                                  |                            | P_trifoliata_00107_mRNA_65.1       |
| GF0045428 | 0                             | 0                       | 1                               | Hypothetical protein (1)                                      |                                                                                                                                                                                                                                                                                                                                                                                                                                                                                                                                                                           |                                                                                                                                                                         |                                  |                            | P_trifoliata_00107_mRNA_64.1       |
| GF0045427 | 0                             | 0                       | 1                               | Cytochrome P450 76C1 (1)                                      | iron ion binding [GO:0005596]; molecular_function (1); heme binding [GO:0020037]; molecular_function (1); oxidoreductase activity, acting on paired donors, with incorporation or reduction of molecular oxygen [GO:0016705]; molecular_function (1); oxidation-reduction process [GO:0055114]; biological_process (1)                                                                                                                                                                                                                                                    | Cytochrome P450 [IPR001128] (1); Cytochrome P450, conserved site [IPR017972] (1); Cytochrome P450, E-class, group 1 [IPR02401] (1)                                      |                                  |                            | P_trifoliata_00107_mRNA_62.1       |
| GF0045426 | 0                             | 0                       | 1                               | Hypothetical protein (1)                                      |                                                                                                                                                                                                                                                                                                                                                                                                                                                                                                                                                                           |                                                                                                                                                                         |                                  |                            | P_trifoliata_00107_mRNA_61.1       |
| GF0045425 | 0                             | 0                       | 1                               | Hypothetical protein (1)                                      |                                                                                                                                                                                                                                                                                                                                                                                                                                                                                                                                                                           |                                                                                                                                                                         |                                  |                            | P_trifoliata_00107_mRNA_60.1       |
| GF0045424 | 0                             | 0                       | 1                               | Hypothetical protein (1)                                      |                                                                                                                                                                                                                                                                                                                                                                                                                                                                                                                                                                           |                                                                                                                                                                         |                                  |                            | P_trifoliata_00107_mRNA_54.1       |
| GF0045423 | 0                             | 0                       | 1                               | Hypothetical protein (1)                                      |                                                                                                                                                                                                                                                                                                                                                                                                                                                                                                                                                                           |                                                                                                                                                                         |                                  |                            | P_trifoliata_00107_mRNA_52.1       |
| GF0045422 | 0                             | 0                       | 1                               | Hypothetical protein (1)                                      |                                                                                                                                                                                                                                                                                                                                                                                                                                                                                                                                                                           |                                                                                                                                                                         |                                  |                            | P_trifoliata_00107_mRNA_51.1       |
| GF0045421 | 0                             | 0                       | 1                               | Hypothetical protein (1)                                      |                                                                                                                                                                                                                                                                                                                                                                                                                                                                                                                                                                           |                                                                                                                                                                         |                                  |                            | P_trifoliata_00107_mRNA_49.1       |
| GF0045420 | 0                             | 0                       | 1                               | Hypothetical protein (1)                                      |                                                                                                                                                                                                                                                                                                                                                                                                                                                                                                                                                                           |                                                                                                                                                                         |                                  |                            | P_trifoliata_00107_mRNA_47.1       |
| GF0045419 | 0                             | 0                       | 1                               | Hypothetical protein (1)                                      | nucleic acid binding [GO:0003676]; molecular_function (1)                                                                                                                                                                                                                                                                                                                                                                                                                                                                                                                 | Ribonuclease H-like domain [IPR012371] (1)                                                                                                                              |                                  |                            | P_trifoliata_00107_mRNA_46.1       |
| GF0045418 | 0                             | 0                       | 1                               | Hypothetical protein (1)                                      |                                                                                                                                                                                                                                                                                                                                                                                                                                                                                                                                                                           |                                                                                                                                                                         |                                  |                            | P_trifoliata_00107_mRNA_45.1       |
| GF0045417 | 0                             | 0                       | 1                               | Hypothetical protein (1)                                      |                                                                                                                                                                                                                                                                                                                                                                                                                                                                                                                                                                           |                                                                                                                                                                         |                                  |                            | P_trifoliata_00107_mRNA_44.1       |
| GF0045416 | 0                             | 0                       | 1                               | Hypothetical protein (1)                                      |                                                                                                                                                                                                                                                                                                                                                                                                                                                                                                                                                                           |                                                                                                                                                                         |                                  |                            | P_trifoliata_00107_mRNA_40.1       |
| GF0045415 | 0                             | 0                       | 1                               | Hypothetical protein (1)                                      | proteolysis [GO:0006508]; biological_process (1); aspartic-type endopeptidase activity [GO:0004190]; molecular_function (1); ribosome [GO:0005840]; cellular_component (1); intracellular [GO:0005622]; cellular_component (1); translation [GO:0006412]; biological_process (1); structural constituent of ribosome [GO:0003735]; molecular_function (1)                                                                                                                                                                                                                 | Pentatricopeptide repeat [IPR002885] (1); Aspartic peptidase, active site [IPR001969] (1)                                                                               |                                  |                            | P_trifoliata_00107_mRNA_4.1        |
| GF0045414 | 0                             | 0                       | 1                               | 60S ribosomal protein L14 (1)                                 | ribosome [GO:0005840]; cellular_component (1); intracellular [GO:0005622]; cellular_component (1); translation [GO:0006412]; biological_process (1); structural constituent of ribosome [GO:0003735]; molecular_function (1)                                                                                                                                                                                                                                                                                                                                              | Ribosomal protein L2 domain 2 [IPR014722] (1); Ribosomal protein L14 [IPR042784] (1); Translation protein SHE3-like domain [IPR008991] (1)                              |                                  |                            | P_trifoliata_00107_mRNA_38.1       |

| ID        | Num. in <i>C. clementiae</i> | Num. in <i>C. canthii</i> | Num. in <i>P. trifoliata</i> | Note                                                                   | GO                                                                                                                                                                                                                                                                                            | InterPro                                                                                                                                                                                                                                                                                                                                                                                                                                                                                                                                                                                     | Members in <i>C. clementiae</i> | Members in <i>C. canthii</i> | Members in <i>P. trifoliata</i> |
|-----------|------------------------------|---------------------------|------------------------------|------------------------------------------------------------------------|-----------------------------------------------------------------------------------------------------------------------------------------------------------------------------------------------------------------------------------------------------------------------------------------------|----------------------------------------------------------------------------------------------------------------------------------------------------------------------------------------------------------------------------------------------------------------------------------------------------------------------------------------------------------------------------------------------------------------------------------------------------------------------------------------------------------------------------------------------------------------------------------------------|---------------------------------|------------------------------|---------------------------------|
| GF0045413 | 0                            | 0                         | 1                            | Hypothetical protein (1)                                               |                                                                                                                                                                                                                                                                                               | Arabidopsis retrotransposon Oef1 [IPR004312] (1); B3 domain-containing protein [IPR005508] (1)                                                                                                                                                                                                                                                                                                                                                                                                                                                                                               | -                               | -                            | P_trifoliata_00107_miRNA_37.1   |
| GF0045412 | 0                            | 0                         | 1                            | Hypothetical protein (1)                                               |                                                                                                                                                                                                                                                                                               |                                                                                                                                                                                                                                                                                                                                                                                                                                                                                                                                                                                              | -                               | -                            | P_trifoliata_00107_miRNA_35.1   |
| GF0045411 | 0                            | 0                         | 1                            | Hypothetical protein (1)                                               |                                                                                                                                                                                                                                                                                               |                                                                                                                                                                                                                                                                                                                                                                                                                                                                                                                                                                                              | -                               | -                            | P_trifoliata_00107_miRNA_34.1   |
| GF0045410 | 0                            | 0                         | 1                            | Hypothetical protein (1)                                               |                                                                                                                                                                                                                                                                                               |                                                                                                                                                                                                                                                                                                                                                                                                                                                                                                                                                                                              | -                               | -                            | P_trifoliata_00107_miRNA_33.1   |
| GF0045409 | 0                            | 0                         | 1                            | Hypothetical protein (1)                                               |                                                                                                                                                                                                                                                                                               |                                                                                                                                                                                                                                                                                                                                                                                                                                                                                                                                                                                              | -                               | -                            | P_trifoliata_00107_miRNA_32.1   |
| GF0045408 | 0                            | 0                         | 1                            | Hypothetical protein (1)                                               |                                                                                                                                                                                                                                                                                               |                                                                                                                                                                                                                                                                                                                                                                                                                                                                                                                                                                                              | -                               | -                            | P_trifoliata_00107_miRNA_31.1   |
| GF0045407 | 0                            | 0                         | 1                            | Hypothetical protein (1)                                               |                                                                                                                                                                                                                                                                                               |                                                                                                                                                                                                                                                                                                                                                                                                                                                                                                                                                                                              | -                               | -                            | P_trifoliata_00107_miRNA_3.1    |
| GF0045406 | 0                            | 0                         | 1                            | Hypothetical protein (1)                                               |                                                                                                                                                                                                                                                                                               |                                                                                                                                                                                                                                                                                                                                                                                                                                                                                                                                                                                              | -                               | -                            | P_trifoliata_00107_miRNA_2.1    |
| GF0045405 | 0                            | 0                         | 1                            | Hypothetical protein (1)                                               |                                                                                                                                                                                                                                                                                               |                                                                                                                                                                                                                                                                                                                                                                                                                                                                                                                                                                                              | -                               | -                            | P_trifoliata_00107_miRNA_18.1   |
| GF0045404 | 0                            | 0                         | 1                            | Somatic embryogenesis receptor kinase 1 (1)                            | protein binding [GO:0005515 molecular_function] (1); ATP binding [GO:0005524 molecular_function] (1); protein phosphorylation [GO:0006468 biological_process] (1); protein kinase activity [GO:0004672 molecular_function] (1)                                                                | Protein kinase domain [IPR000719] (1); Leucine-rich repeat domain, L domain-like [IPR032675] (1); Protein kinase-like domain [IPR011009] (1); Concavalin A-like lectin/glucanase domain [IPR013320] (1); Leucine-rich repeat-containing N-terminal, plant-type [IPR013210] (1); Leucine-rich repeat [IPR001611] (1); Serine/threonine/tyrosine-protein kinase catalytic domain [IPR001245] (1)                                                                                                                                                                                               | -                               | -                            | P_trifoliata_00107_miRNA_13.1   |
| GF0045403 | 0                            | 0                         | 1                            | Hypothetical protein (1)                                               |                                                                                                                                                                                                                                                                                               |                                                                                                                                                                                                                                                                                                                                                                                                                                                                                                                                                                                              | -                               | -                            | P_trifoliata_00106_miRNA_63.1   |
| GF0045402 | 0                            | 0                         | 1                            | Hypothetical protein (1)                                               |                                                                                                                                                                                                                                                                                               | Transposase, MuDR, plant [IPR004332] (1); MULE transposase domain [IPR018289] (1)                                                                                                                                                                                                                                                                                                                                                                                                                                                                                                            | -                               | -                            | P_trifoliata_00106_miRNA_60.1   |
| GF0045401 | 0                            | 0                         | 1                            | Protein LIKE COV 2 (1)                                                 |                                                                                                                                                                                                                                                                                               | Protein of unknown function DUF502 [IPR07462] (1)                                                                                                                                                                                                                                                                                                                                                                                                                                                                                                                                            | -                               | -                            | P_trifoliata_00106_miRNA_56.1   |
| GF0045400 | 0                            | 0                         | 1                            | Hypothetical protein (1)                                               |                                                                                                                                                                                                                                                                                               | Domain of unknown function DUF4283 [IPR025558] (1); Reverse transcriptase domain [IPR008477] (1)                                                                                                                                                                                                                                                                                                                                                                                                                                                                                             | -                               | -                            | P_trifoliata_00106_miRNA_52.1   |
| GF0045399 | 0                            | 0                         | 1                            | Hypothetical protein (1)                                               |                                                                                                                                                                                                                                                                                               |                                                                                                                                                                                                                                                                                                                                                                                                                                                                                                                                                                                              | -                               | -                            | P_trifoliata_00106_miRNA_50.1   |
| GF0045398 | 0                            | 0                         | 1                            | Hypothetical protein (1)                                               |                                                                                                                                                                                                                                                                                               |                                                                                                                                                                                                                                                                                                                                                                                                                                                                                                                                                                                              | -                               | -                            | P_trifoliata_00106_miRNA_49.1   |
| GF0045397 | 0                            | 0                         | 1                            | Hypothetical protein (1)                                               | DNA replication [GO:0006260 biological_process] (1); oxidation-reduction process [GO:0055114 biological_process] (1)                                                                                                                                                                          | Ribonucleotide reductase large subunit, C-terminal [IPR000788] (1)                                                                                                                                                                                                                                                                                                                                                                                                                                                                                                                           | -                               | -                            | P_trifoliata_00106_miRNA_47.1   |
| GF0045396 | 0                            | 0                         | 1                            | Hypothetical protein (1)                                               | DNA replication [GO:0006260 biological_process] (1); oxidation-reduction process [GO:0055114 biological_process] (1)                                                                                                                                                                          | Ribonucleotide reductase large subunit, C-terminal [IPR000788] (1); Ribonucleotide reductase, class 1, alpha subunit [IPR013346] (1)                                                                                                                                                                                                                                                                                                                                                                                                                                                         | -                               | -                            | P_trifoliata_00106_miRNA_46.1   |
| GF0045395 | 0                            | 0                         | 1                            | Hypothetical protein (1)                                               |                                                                                                                                                                                                                                                                                               |                                                                                                                                                                                                                                                                                                                                                                                                                                                                                                                                                                                              | -                               | -                            | P_trifoliata_00106_miRNA_41.1   |
| GF0045394 | 0                            | 0                         | 1                            | Hypothetical protein (1)                                               |                                                                                                                                                                                                                                                                                               |                                                                                                                                                                                                                                                                                                                                                                                                                                                                                                                                                                                              | -                               | -                            | P_trifoliata_00106_miRNA_40.1   |
| GF0045393 | 0                            | 0                         | 1                            | Hypothetical protein (1)                                               |                                                                                                                                                                                                                                                                                               | Bull-type lectin domain [IPR001480] (1)                                                                                                                                                                                                                                                                                                                                                                                                                                                                                                                                                      | -                               | -                            | P_trifoliata_00106_miRNA_36.1   |
| GF0045392 | 0                            | 0                         | 1                            | G-type lectin S-receptor-like serine/threonine-protein kinase RLK1 (1) | ATP binding [GO:0005524 molecular_function] (1); recognition of pollen [GO:0048544 biological_process] (1)                                                                                                                                                                                    | PAN/Apple domain [IPR003609] (1); Bull-type lectin domain [IPR001480] (1); Protein kinase, ATP binding site [IPR017441] (1); S-locus glycoprotein domain [IPR008583] (1); Protein kinase-like domain [IPR011009] (1); Concavalin A-like lectin/glucanase domain [IPR013320] (1)                                                                                                                                                                                                                                                                                                              | -                               | -                            | P_trifoliata_00106_miRNA_34.1   |
| GF0045391 | 0                            | 0                         | 1                            | Hypothetical protein (1)                                               |                                                                                                                                                                                                                                                                                               |                                                                                                                                                                                                                                                                                                                                                                                                                                                                                                                                                                                              | -                               | -                            | P_trifoliata_00106_miRNA_27.1   |
| GF0045390 | 0                            | 0                         | 1                            | Hypothetical protein (1)                                               |                                                                                                                                                                                                                                                                                               |                                                                                                                                                                                                                                                                                                                                                                                                                                                                                                                                                                                              | -                               | -                            | P_trifoliata_00106_miRNA_24.1   |
| GF0045389 | 0                            | 0                         | 1                            | UDP-glycosyltransferase 92A1 (1)                                       | metabolic process [GO:0008152 biological_process] (1); transferase activity, transferring hexosyl groups [GO:0016758 molecular_function] (1)                                                                                                                                                  | UDP-glucosyltransferase [IPR000213] (1)                                                                                                                                                                                                                                                                                                                                                                                                                                                                                                                                                      | -                               | -                            | P_trifoliata_00106_miRNA_22.1   |
| GF0045388 | 0                            | 0                         | 1                            | Hypothetical protein (1)                                               |                                                                                                                                                                                                                                                                                               |                                                                                                                                                                                                                                                                                                                                                                                                                                                                                                                                                                                              | -                               | -                            | P_trifoliata_00106_miRNA_21.1   |
| GF0045387 | 0                            | 0                         | 1                            | Hypothetical protein (1)                                               |                                                                                                                                                                                                                                                                                               |                                                                                                                                                                                                                                                                                                                                                                                                                                                                                                                                                                                              | -                               | -                            | P_trifoliata_00105_miRNA_87.1   |
| GF0045386 | 0                            | 0                         | 1                            | Hypothetical protein (1)                                               | protein binding [GO:0005515 molecular_function] (1)                                                                                                                                                                                                                                           | PB1 domain [IPR000270] (1)                                                                                                                                                                                                                                                                                                                                                                                                                                                                                                                                                                   | -                               | -                            | P_trifoliata_00105_miRNA_82.1   |
| GF0045385 | 0                            | 0                         | 1                            | Hypothetical protein (1)                                               |                                                                                                                                                                                                                                                                                               |                                                                                                                                                                                                                                                                                                                                                                                                                                                                                                                                                                                              | -                               | -                            | P_trifoliata_00105_miRNA_77.1   |
| GF0045384 | 0                            | 0                         | 1                            | Hypothetical protein (1)                                               | membrane [GO:0016020 cellular_component] (1)                                                                                                                                                                                                                                                  | Plant PDR ABC transporter associated [IPR013581] (1); ABC-transporter extracellular N-terminal domain [IPR029481] (1); ABC-2 type transporter [IPR013525] (1)                                                                                                                                                                                                                                                                                                                                                                                                                                | -                               | -                            | P_trifoliata_00105_miRNA_76.1   |
| GF0045383 | 0                            | 0                         | 1                            | Hypothetical protein (1)                                               |                                                                                                                                                                                                                                                                                               |                                                                                                                                                                                                                                                                                                                                                                                                                                                                                                                                                                                              | -                               | -                            | P_trifoliata_00105_miRNA_66.1   |
| GF0045382 | 0                            | 0                         | 1                            | Hypothetical protein (1)                                               |                                                                                                                                                                                                                                                                                               |                                                                                                                                                                                                                                                                                                                                                                                                                                                                                                                                                                                              | -                               | -                            | P_trifoliata_00105_miRNA_64.1   |
| GF0045381 | 0                            | 0                         | 1                            | Hypothetical protein (1)                                               |                                                                                                                                                                                                                                                                                               |                                                                                                                                                                                                                                                                                                                                                                                                                                                                                                                                                                                              | -                               | -                            | P_trifoliata_00105_miRNA_37.1   |
| GF0045380 | 0                            | 0                         | 1                            | Hypothetical protein (1)                                               |                                                                                                                                                                                                                                                                                               |                                                                                                                                                                                                                                                                                                                                                                                                                                                                                                                                                                                              | -                               | -                            | P_trifoliata_00105_miRNA_33.1   |
| GF0045379 | 0                            | 0                         | 1                            | Hypothetical protein (1)                                               |                                                                                                                                                                                                                                                                                               |                                                                                                                                                                                                                                                                                                                                                                                                                                                                                                                                                                                              | -                               | -                            | P_trifoliata_00105_miRNA_32.1   |
| GF0045378 | 0                            | 0                         | 1                            | Hypothetical protein (1)                                               |                                                                                                                                                                                                                                                                                               |                                                                                                                                                                                                                                                                                                                                                                                                                                                                                                                                                                                              | -                               | -                            | P_trifoliata_00105_miRNA_31.1   |
| GF0045377 | 0                            | 0                         | 1                            | Hypothetical protein (1)                                               |                                                                                                                                                                                                                                                                                               |                                                                                                                                                                                                                                                                                                                                                                                                                                                                                                                                                                                              | -                               | -                            | P_trifoliata_00105_miRNA_30.1   |
| GF0045376 | 0                            | 0                         | 1                            | Elongation factor 1-alpha (1)                                          |                                                                                                                                                                                                                                                                                               | Translation elongation factor EFlA/initiation factor IF2gamma, C-terminal [IPR009001] (1); Translation elongation factor EFTu/EFlA, C-terminal [IPR004160] (1)                                                                                                                                                                                                                                                                                                                                                                                                                               | -                               | -                            | P_trifoliata_00105_miRNA_26.1   |
| GF0045375 | 0                            | 0                         | 1                            | Hypothetical protein (1)                                               | GTP binding [GO:0005525 molecular_function] (1)                                                                                                                                                                                                                                               | Translation elongation factor EFTu/EFlA, domain 2 [IPR004161] (1); P-loop containing nucleoside triphosphate hydrolase [IPR027417] (1); Translation protein, beta-barrel domain [IPR009000] (1)                                                                                                                                                                                                                                                                                                                                                                                              | -                               | -                            | P_trifoliata_00105_miRNA_25.1   |
| GF0045374 | 0                            | 0                         | 1                            | Elongation factor 1-alpha (1)                                          | GTP binding [GO:0005525 molecular_function] (1); translational elongation [GO:0006414 biological_process] (1); cytoplasm [GO:0005737 cellular_component] (1); GTPase activity [GO:0003924 molecular_function] (1); translation elongation factor activity [GO:0003746 molecular_function] (1) | Translation elongation factor EFTu/EFlA, domain 2 [IPR004161] (1); Tr-type G domain, conserved site [IPR01157] (1); Translation elongation factor EFlA, eukaryotic/archaeal [IPR004539] (1); Translation elongation factor EFlA/initiation factor IF2gamma, C-terminal [IPR009001] (1); Transcription factor GTP-binding domain [IPR000795] (1); Pentatricopeptide repeat [IPR002885] (1); Translation elongation factor EFTu/EFlA, C-terminal [IPR004160] (1); P-loop containing nucleoside triphosphate hydrolase [IPR027417] (1); Translation protein, beta-barrel domain [IPR009000] (1) | -                               | -                            | P_trifoliata_00105_miRNA_24.1   |
| GF0045373 | 0                            | 0                         | 1                            | Hypothetical protein (1)                                               |                                                                                                                                                                                                                                                                                               |                                                                                                                                                                                                                                                                                                                                                                                                                                                                                                                                                                                              | -                               | -                            | P_trifoliata_00105_miRNA_13.1   |
| GF0045372 | 0                            | 0                         | 1                            | Hypothetical protein (1)                                               |                                                                                                                                                                                                                                                                                               | Retrotransposon gag domain [IPR005162] (1)                                                                                                                                                                                                                                                                                                                                                                                                                                                                                                                                                   | -                               | -                            | P_trifoliata_00104_miRNA_8.1    |
| GF0045371 | 0                            | 0                         | 1                            | Hypothetical protein (1)                                               | proteolysis [GO:0006508 biological_process] (1); aspartic-type endopeptidase activity [GO:0004190 molecular_function] (1)                                                                                                                                                                     | Aspartic peptidase domain [IPR021109] (1); Peptidase family A1 domain [IPR033121] (1); Aspartic peptidase A1 family [IPR010461] (1); Xylanase inhibitor, C-terminal [IPR032799] (1); Aspartic peptidase, active site [IPR001969] (1)                                                                                                                                                                                                                                                                                                                                                         | -                               | -                            | P_trifoliata_00104_miRNA_74.1   |
| GF0045370 | 0                            | 0                         | 1                            | Cysteine-rich receptor-like protein kinase 25 (1)                      | protein serine/threonine kinase activity [GO:0004674 molecular_function] (1); protein kinase activity [GO:0004672 molecular_function] (1); protein phosphorylation [GO:0006468 biological_process] (1)                                                                                        | Protein kinase-like domain [IPR011009] (1); S-locus receptor kinase, C-terminal [IPR021820] (1); Serine/threonine/tyrosine-protein kinase catalytic domain [IPR001245] (1); Gsk2-homologous domain [IPR002902] (1)                                                                                                                                                                                                                                                                                                                                                                           | -                               | -                            | P_trifoliata_00104_miRNA_71.1   |
| GF0045369 | 0                            | 0                         | 1                            | Hypothetical protein (1)                                               |                                                                                                                                                                                                                                                                                               |                                                                                                                                                                                                                                                                                                                                                                                                                                                                                                                                                                                              | -                               | -                            | P_trifoliata_00104_miRNA_7.1    |
| GF0045368 | 0                            | 0                         | 1                            | Hypothetical protein (1)                                               |                                                                                                                                                                                                                                                                                               |                                                                                                                                                                                                                                                                                                                                                                                                                                                                                                                                                                                              | -                               | -                            | P_trifoliata_00104_miRNA_6.1    |
| GF0045367 | 0                            | 0                         | 1                            | Hypothetical protein (1)                                               |                                                                                                                                                                                                                                                                                               |                                                                                                                                                                                                                                                                                                                                                                                                                                                                                                                                                                                              | -                               | -                            | P_trifoliata_00104_miRNA_59.1   |
| GF0045366 | 0                            | 0                         | 1                            | Hypothetical protein (1)                                               |                                                                                                                                                                                                                                                                                               |                                                                                                                                                                                                                                                                                                                                                                                                                                                                                                                                                                                              | -                               | -                            | P_trifoliata_00104_miRNA_58.1   |
| GF0045365 | 0                            | 0                         | 1                            | Hypothetical protein (1)                                               |                                                                                                                                                                                                                                                                                               |                                                                                                                                                                                                                                                                                                                                                                                                                                                                                                                                                                                              | -                               | -                            | P_trifoliata_00104_miRNA_51.1   |
| GF0045364 | 0                            | 0                         | 1                            | Hypothetical protein (1)                                               |                                                                                                                                                                                                                                                                                               | Protein of unknown function DUF247, plant [IPR004158] (1)                                                                                                                                                                                                                                                                                                                                                                                                                                                                                                                                    | -                               | -                            | P_trifoliata_00104_miRNA_5.1    |
| GF0045363 | 0                            | 0                         | 1                            | Hypothetical protein (1)                                               |                                                                                                                                                                                                                                                                                               |                                                                                                                                                                                                                                                                                                                                                                                                                                                                                                                                                                                              | -                               | -                            | P_trifoliata_00104_miRNA_4.1    |
| GF0045362 | 0                            | 0                         | 1                            | Hypothetical protein (1)                                               |                                                                                                                                                                                                                                                                                               |                                                                                                                                                                                                                                                                                                                                                                                                                                                                                                                                                                                              | -                               | -                            | P_trifoliata_00104_miRNA_39.1   |
| GF0045361 | 0                            | 0                         | 1                            | Hypothetical protein (1)                                               |                                                                                                                                                                                                                                                                                               |                                                                                                                                                                                                                                                                                                                                                                                                                                                                                                                                                                                              | -                               | -                            | P_trifoliata_00104_miRNA_3.1    |
| GF0045360 | 0                            | 0                         | 1                            | Phosphoprotein phosphatase (1)                                         | protein binding [GO:0005515 molecular_function] (1); binding [GO:0005488 molecular_function] (1)                                                                                                                                                                                              | Armadillo-like helical [IPR011989] (1); Leucine-rich repeat domain, L domain-like [IPR032675] (1); Armadillo [IPR000225] (1); Armadillo-type fold [IPR016024] (1)                                                                                                                                                                                                                                                                                                                                                                                                                            | -                               | -                            | P_trifoliata_00104_miRNA_24.1   |
| GF0045359 | 0                            | 0                         | 1                            | Hypothetical protein (1)                                               | binding [GO:0005488 molecular_function] (1); protein binding [GO:0005515 molecular_function] (1)                                                                                                                                                                                              | Armadillo [IPR000225] (1); Armadillo-like helical [IPR011989] (1); Armadillo-type fold [IPR016024] (1)                                                                                                                                                                                                                                                                                                                                                                                                                                                                                       | -                               | -                            | P_trifoliata_00104_miRNA_21.1   |
| GF0045358 | 0                            | 0                         | 1                            | Hypothetical protein (1)                                               |                                                                                                                                                                                                                                                                                               |                                                                                                                                                                                                                                                                                                                                                                                                                                                                                                                                                                                              | -                               | -                            | P_trifoliata_00104_miRNA_18.1   |
| GF0045357 | 0                            | 0                         | 1                            | Hypothetical protein (1)                                               |                                                                                                                                                                                                                                                                                               |                                                                                                                                                                                                                                                                                                                                                                                                                                                                                                                                                                                              | -                               | -                            | P_trifoliata_00104_miRNA_15.1   |
| GF0045356 | 0                            | 0                         | 1                            | Hypothetical protein (1)                                               |                                                                                                                                                                                                                                                                                               |                                                                                                                                                                                                                                                                                                                                                                                                                                                                                                                                                                                              | -                               | -                            | P_trifoliata_00104_miRNA_14.1   |
| GF0045355 | 0                            | 0                         | 1                            | Hypothetical protein (1)                                               |                                                                                                                                                                                                                                                                                               |                                                                                                                                                                                                                                                                                                                                                                                                                                                                                                                                                                                              | -                               | -                            | P_trifoliata_00104_miRNA_13.1   |
| GF0045354 | 0                            | 0                         | 1                            | Hypothetical protein (1)                                               |                                                                                                                                                                                                                                                                                               |                                                                                                                                                                                                                                                                                                                                                                                                                                                                                                                                                                                              | -                               | -                            | P_trifoliata_00103_miRNA_73.1   |
| GF0045353 | 0                            | 0                         | 1                            | Hypothetical protein (1)                                               |                                                                                                                                                                                                                                                                                               |                                                                                                                                                                                                                                                                                                                                                                                                                                                                                                                                                                                              | -                               | -                            | P_trifoliata_00103_miRNA_71.1   |

| ID        | Num. in <i>C. clementiae</i> | Num. in <i>C. canthii</i> | Num. in <i>P. trifoliata</i> | Note                                                                        | GO                                                                                                                                                                                                                            | InterPro                                                                                                                                                                                                                                                                         | Members in <i>C. clementiae</i> | Members in <i>C. canthii</i> | Members in <i>P. trifoliata</i> |
|-----------|------------------------------|---------------------------|------------------------------|-----------------------------------------------------------------------------|-------------------------------------------------------------------------------------------------------------------------------------------------------------------------------------------------------------------------------|----------------------------------------------------------------------------------------------------------------------------------------------------------------------------------------------------------------------------------------------------------------------------------|---------------------------------|------------------------------|---------------------------------|
| GF0045352 | 0                            | 0                         | 1                            | Putative non-LTR reverse transcriptase                                      | nucleic acid binding [GO:0003676]<br>molecular_function (1)                                                                                                                                                                   | Phloem protein 2-like [IPR025886] (1);<br>Reverse transcriptase zinc-binding domain [IPR026960] (1); Ribonuclease H-like domain [IPR012337] (1)                                                                                                                                  | -                               | -                            | P_trifoliata_00103_mRNA_68.1    |
| GF0045351 | 0                            | 0                         | 1                            | Hypothetical protein (1)                                                    |                                                                                                                                                                                                                               |                                                                                                                                                                                                                                                                                  |                                 |                              | P_trifoliata_00103_mRNA_63.1    |
| GF0045350 | 0                            | 0                         | 1                            | Hypothetical protein (1)                                                    |                                                                                                                                                                                                                               |                                                                                                                                                                                                                                                                                  |                                 |                              | P_trifoliata_00103_mRNA_62.1    |
| GF0045349 | 0                            | 0                         | 1                            | Hypothetical protein (1)                                                    |                                                                                                                                                                                                                               | Domain of unknown function DUF4283 [IPR025558] (1); Zinc knuckle CXC2X4HXAC [IPR025836] (1); Endonuclease/exonuclease/phosphatase [IPR005135] (1)                                                                                                                                |                                 |                              | P_trifoliata_00103_mRNA_61.1    |
| GF0045348 | 0                            | 0                         | 1                            | Hypothetical protein (1)                                                    |                                                                                                                                                                                                                               |                                                                                                                                                                                                                                                                                  |                                 |                              | P_trifoliata_00103_mRNA_6.1     |
| GF0045347 | 0                            | 0                         | 1                            | Hypothetical protein (1)                                                    |                                                                                                                                                                                                                               | Domain of unknown function DUF4283 [IPR025558] (1)                                                                                                                                                                                                                               |                                 |                              | P_trifoliata_00103_mRNA_57.1    |
| GF0045346 | 0                            | 0                         | 1                            | Hypothetical protein (1)                                                    |                                                                                                                                                                                                                               |                                                                                                                                                                                                                                                                                  |                                 |                              | P_trifoliata_00103_mRNA_55.1    |
| GF0045345 | 0                            | 0                         | 1                            | Calmodulin (1)                                                              | calcium ion binding [GO:0005509]<br>molecular_function (1)                                                                                                                                                                    | EF-Hand 1, calcium-binding site [IPR018247] (1); EF-hand domain [IPR002048] (1); EF-hand domain pair [IPR011992] (1)                                                                                                                                                             |                                 |                              | P_trifoliata_00103_mRNA_53.1    |
| GF0045344 | 0                            | 0                         | 1                            | Hypothetical protein (1)                                                    | nucleic acid binding [GO:0003676]<br>molecular_function (1)                                                                                                                                                                   | Ribonuclease H-like domain [IPR012337] (1)                                                                                                                                                                                                                                       |                                 |                              | P_trifoliata_00103_mRNA_50.1    |
| GF0045343 | 0                            | 0                         | 1                            | Glutathione peroxidase (1)                                                  | nucleic acid binding [GO:0004602]<br>molecular_function (1); response to oxidative stress [GO:0006979]<br>biological_process (1); oxidation-reduction process [GO:0055114]<br>biological_process (1)                          | Glutathione peroxidase [IPR000889] (1);<br>Thioredoxin-like fold [IPR012336] (1)                                                                                                                                                                                                 |                                 |                              | P_trifoliata_00103_mRNA_43.1    |
| GF0045342 | 0                            | 0                         | 1                            | Hypothetical protein (1)                                                    |                                                                                                                                                                                                                               |                                                                                                                                                                                                                                                                                  |                                 |                              | P_trifoliata_00103_mRNA_37.1    |
| GF0045341 | 0                            | 0                         | 1                            | Putative oligopeptide transporter (1)                                       | transmembrane transport [GO:0055085]<br>biological_process (1)                                                                                                                                                                | Oligopeptide transporter, OPT superfamily [IPR004813] (1)                                                                                                                                                                                                                        |                                 |                              | P_trifoliata_00103_mRNA_30.1    |
| GF0045340 | 0                            | 0                         | 1                            | WD repeat-containing protein 82 (1)                                         | protein binding [GO:0005515]<br>molecular_function (1)                                                                                                                                                                        | WD40 repeat-containing domain [IPR017985] (1); WD40 repeat [IPR001680] (1); WD40/YVTN repeat-like-containing domain [IPR015943] (1)                                                                                                                                              |                                 |                              | P_trifoliata_00103_mRNA_28.1    |
| GF0045339 | 0                            | 0                         | 1                            | Hypothetical protein (1)                                                    |                                                                                                                                                                                                                               |                                                                                                                                                                                                                                                                                  |                                 |                              | P_trifoliata_00103_mRNA_16.1    |
| GF0045338 | 0                            | 0                         | 1                            | Cytosolic ribonucleic acid phosphohydrolase (1)                             |                                                                                                                                                                                                                               | LOG family [IPR031100] (1)                                                                                                                                                                                                                                                       |                                 |                              | P_trifoliata_00102_mRNA_59.1    |
| GF0045337 | 0                            | 0                         | 1                            | Hypothetical protein (1)                                                    |                                                                                                                                                                                                                               |                                                                                                                                                                                                                                                                                  |                                 |                              | P_trifoliata_00102_mRNA_54.1    |
| GF0045336 | 0                            | 0                         | 1                            | Hypothetical protein (1)                                                    |                                                                                                                                                                                                                               |                                                                                                                                                                                                                                                                                  |                                 |                              | P_trifoliata_00102_mRNA_53.1    |
| GF0045335 | 0                            | 0                         | 1                            | Hypothetical protein (1)                                                    |                                                                                                                                                                                                                               |                                                                                                                                                                                                                                                                                  |                                 |                              | P_trifoliata_00102_mRNA_50.1    |
| GF0045334 | 0                            | 0                         | 1                            | Hypothetical protein (1)                                                    |                                                                                                                                                                                                                               |                                                                                                                                                                                                                                                                                  |                                 |                              | P_trifoliata_00102_mRNA_49.1    |
| GF0045333 | 0                            | 0                         | 1                            | Disease resistance protein (TR-NBS-LRR class) (1)                           | protein binding [GO:0005515]<br>molecular_function (1); ADP binding [GO:0043531]<br>molecular_function (1); signal transduction [GO:0007165]<br>biological_process (1)                                                        | NB-ARC [IPR002182] (1); P-loop containing nucleoside triphosphate hydrolase [IPR027471] (1); Leucine-rich repeat domain, L domain-like [IPR032675] (1); Winged helix-helix DNA-binding domain [IPR011991] (1); Toll/interleukin-1 receptor homology (TIR) domain [IPR000157] (1) |                                 |                              | P_trifoliata_00102_mRNA_46.1    |
| GF0045332 | 0                            | 0                         | 1                            | Hypothetical protein (1)                                                    |                                                                                                                                                                                                                               |                                                                                                                                                                                                                                                                                  |                                 |                              | P_trifoliata_00102_mRNA_45.1    |
| GF0045331 | 0                            | 0                         | 1                            | Hypothetical protein (1)                                                    | proteolysis [GO:0006508]<br>biological_process (1); cysteine-type peptidase activity [GO:0008234]<br>molecular_function (1)                                                                                                   | Probable transposase, Pua/Ea/Spm, plant [IPR004252] (1); Ulp1 protease family, C-terminal catalytic domain [IPR003653] (1)                                                                                                                                                       |                                 |                              | P_trifoliata_00102_mRNA_36.1    |
| GF0045330 | 0                            | 0                         | 1                            | Hypothetical protein (1)                                                    |                                                                                                                                                                                                                               |                                                                                                                                                                                                                                                                                  |                                 |                              | P_trifoliata_00102_mRNA_35.1    |
| GF0045329 | 0                            | 0                         | 1                            | Hypothetical protein (1)                                                    |                                                                                                                                                                                                                               |                                                                                                                                                                                                                                                                                  |                                 |                              | P_trifoliata_00102_mRNA_31.1    |
| GF0045328 | 0                            | 0                         | 1                            | Hypothetical protein (1)                                                    |                                                                                                                                                                                                                               |                                                                                                                                                                                                                                                                                  |                                 |                              | P_trifoliata_00102_mRNA_3.1     |
| GF0045327 | 0                            | 0                         | 1                            | Hypothetical protein (1)                                                    |                                                                                                                                                                                                                               |                                                                                                                                                                                                                                                                                  |                                 |                              | P_trifoliata_00102_mRNA_17.1    |
| GF0045326 | 0                            | 0                         | 1                            | Hypothetical protein (1)                                                    |                                                                                                                                                                                                                               |                                                                                                                                                                                                                                                                                  |                                 |                              | P_trifoliata_00102_mRNA_1.1     |
| GF0045325 | 0                            | 0                         | 1                            | LRR receptor-like serine/threonine-protein kinase GSO2 (1)                  | protein binding [GO:0005515]<br>molecular_function (1)                                                                                                                                                                        | Leucine-rich repeat [IPR001611] (1);<br>Leucine-rich repeat domain, L domain-like [IPR032675] (1)                                                                                                                                                                                |                                 |                              | P_trifoliata_00101_mRNA_79.1    |
| GF0045324 | 0                            | 0                         | 1                            | Hypothetical protein (1)                                                    |                                                                                                                                                                                                                               |                                                                                                                                                                                                                                                                                  |                                 |                              | P_trifoliata_00101_mRNA_78.1    |
| GF0045323 | 0                            | 0                         | 1                            | Hypothetical protein (1)                                                    | protein domain specific binding [GO:0019904]<br>molecular_function (1)                                                                                                                                                        | 14-3-3 domain [IPR023410] (1); 14-3-3 protein [IPR000308] (1)                                                                                                                                                                                                                    |                                 |                              | P_trifoliata_00101_mRNA_77.1    |
| GF0045322 | 0                            | 0                         | 1                            | Hypothetical protein (1)                                                    |                                                                                                                                                                                                                               |                                                                                                                                                                                                                                                                                  |                                 |                              | P_trifoliata_00101_mRNA_73.1    |
| GF0045321 | 0                            | 0                         | 1                            | Hypothetical protein (1)                                                    |                                                                                                                                                                                                                               |                                                                                                                                                                                                                                                                                  |                                 |                              | P_trifoliata_00101_mRNA_7.1     |
| GF0045320 | 0                            | 0                         | 1                            | Hypothetical protein (1)                                                    |                                                                                                                                                                                                                               |                                                                                                                                                                                                                                                                                  |                                 |                              | P_trifoliata_00101_mRNA_66.1    |
| GF0045319 | 0                            | 0                         | 1                            | Hypothetical protein (1)                                                    |                                                                                                                                                                                                                               |                                                                                                                                                                                                                                                                                  |                                 |                              | P_trifoliata_00101_mRNA_60.1    |
| GF0045318 | 0                            | 0                         | 1                            | 2-oxoglutarate (2OG) and Fe(II)-dependent oxygenase superfamily protein (1) | oxidoreductase activity [GO:0016491]<br>molecular_function (1); oxidation-reduction process [GO:0055114]<br>biological_process (1); iron ion binding [GO:0005506]<br>molecular_function (1)                                   | Isopenicillin N synthase [IPR002283] (1);<br>Isopenicillin N synthase-like [IPR027443] (1); Non-haem dioxygenase N-terminal domain [IPR026962] (1);<br>Oxoglutarate/iron-dependent dioxygenase [IPR005123] (1)                                                                   |                                 |                              | P_trifoliata_00101_mRNA_58.1    |
| GF0045317 | 0                            | 0                         | 1                            | 2-oxoglutarate (2OG) and Fe(II)-dependent oxygenase superfamily protein (1) | oxidation-reduction process [GO:0055114]<br>biological_process (1); oxidoreductase activity [GO:0016491]<br>molecular_function (1)                                                                                            | Oxoglutarate/iron-dependent dioxygenase [IPR005123] (1);<br>Isopenicillin N synthase-like [IPR027443] (1)                                                                                                                                                                        |                                 |                              | P_trifoliata_00101_mRNA_57.1    |
| GF0045316 | 0                            | 0                         | 1                            | Hypothetical protein (1)                                                    |                                                                                                                                                                                                                               |                                                                                                                                                                                                                                                                                  |                                 |                              | P_trifoliata_00101_mRNA_56.1    |
| GF0045315 | 0                            | 0                         | 1                            | Hypothetical protein (1)                                                    |                                                                                                                                                                                                                               |                                                                                                                                                                                                                                                                                  |                                 |                              | P_trifoliata_00101_mRNA_52.1    |
| GF0045314 | 0                            | 0                         | 1                            | Leucine-rich repeat protein kinase family protein, putative (1)             | ATP binding [GO:0005524]<br>molecular_function (1); protein kinase activity [GO:0004672]<br>molecular_function (1); protein phosphorylation [GO:0006468]<br>biological_process (1)                                            | Protein kinase domain [IPR000719] (1);<br>Protein kinase-like domain [IPR011009] (1)                                                                                                                                                                                             |                                 |                              | P_trifoliata_00101_mRNA_50.1    |
| GF0045313 | 0                            | 0                         | 1                            | Hypothetical protein (1)                                                    | ATP binding [GO:0005524]<br>molecular_function (1)                                                                                                                                                                            | Concanavalin A-like lectin glucanase domain [IPR013200] (1); Protein kinase-like domain [IPR011009] (1); Protein kinase, ATP binding site [IPR017441] (1)                                                                                                                        |                                 |                              | P_trifoliata_00101_mRNA_49.1    |
| GF0045312 | 0                            | 0                         | 1                            | Hypothetical protein (1)                                                    | protein kinase activity [GO:0004672]<br>molecular_function (1); protein phosphorylation [GO:0006468]<br>biological_process (1); ATP binding [GO:0005524]<br>molecular_function (1)                                            | Serine/threonine-protein kinase, active site [IPR008271] (1); Protein kinase-like domain [IPR011009] (1); Protein kinase domain [IPR000719] (1)                                                                                                                                  |                                 |                              | P_trifoliata_00101_mRNA_48.1    |
| GF0045311 | 0                            | 0                         | 1                            | Hypothetical protein (1)                                                    |                                                                                                                                                                                                                               | Probable transposase, Pua/Ea/Spm, plant [IPR004252] (1)                                                                                                                                                                                                                          |                                 |                              | P_trifoliata_00101_mRNA_41.1    |
| GF0045310 | 0                            | 0                         | 1                            | Hypothetical protein (1)                                                    |                                                                                                                                                                                                                               |                                                                                                                                                                                                                                                                                  |                                 |                              | P_trifoliata_00101_mRNA_40.1    |
| GF0045309 | 0                            | 0                         | 1                            | Hypothetical protein (1)                                                    |                                                                                                                                                                                                                               | Viral movement protein [IPR028919] (1)                                                                                                                                                                                                                                           |                                 |                              | P_trifoliata_00101_mRNA_4.1     |
| GF0045308 | 0                            | 0                         | 1                            | Hypothetical protein (1)                                                    |                                                                                                                                                                                                                               |                                                                                                                                                                                                                                                                                  |                                 |                              | P_trifoliata_00101_mRNA_37.1    |
| GF0045307 | 0                            | 0                         | 1                            | Hypothetical protein (1)                                                    |                                                                                                                                                                                                                               |                                                                                                                                                                                                                                                                                  |                                 |                              | P_trifoliata_00101_mRNA_3.1     |
| GF0045306 | 0                            | 0                         | 1                            | Hypothetical protein (1)                                                    |                                                                                                                                                                                                                               |                                                                                                                                                                                                                                                                                  |                                 |                              | P_trifoliata_00101_mRNA_28.1    |
| GF0045305 | 0                            | 0                         | 1                            | Hypothetical protein (1)                                                    |                                                                                                                                                                                                                               |                                                                                                                                                                                                                                                                                  |                                 |                              | P_trifoliata_00101_mRNA_25.1    |
| GF0045304 | 0                            | 0                         | 1                            | Hypothetical protein (1)                                                    |                                                                                                                                                                                                                               |                                                                                                                                                                                                                                                                                  |                                 |                              | P_trifoliata_00101_mRNA_20.1    |
| GF0045303 | 0                            | 0                         | 1                            | Hypothetical protein (1)                                                    |                                                                                                                                                                                                                               |                                                                                                                                                                                                                                                                                  |                                 |                              | P_trifoliata_00101_mRNA_12.1    |
| GF0045302 | 0                            | 0                         | 1                            | Hypothetical protein (1)                                                    | phospholipid biosynthetic process [GO:0008654]<br>biological_process (1); inositol biosynthetic process [GO:0006021]<br>biological_process (1); inositol 3-phosphate synthase activity [GO:0004512]<br>molecular_function (1) | Myo-inositol-1-phosphate synthase [IPR002587] (1); NAD(P)-binding domain [IPR016040] (1)                                                                                                                                                                                         |                                 |                              | P_trifoliata_00100_mRNA_5.1     |
| GF0045301 | 0                            | 0                         | 1                            | Hypothetical protein (1)                                                    |                                                                                                                                                                                                                               | MULE transposase domain [IPR018289] (1)                                                                                                                                                                                                                                          |                                 |                              | P_trifoliata_00100_mRNA_44.1    |
| GF0045300 | 0                            | 0                         | 1                            | Hypothetical protein (1)                                                    |                                                                                                                                                                                                                               |                                                                                                                                                                                                                                                                                  |                                 |                              | P_trifoliata_00100_mRNA_43.1    |
| GF0045299 | 0                            | 0                         | 1                            | Hypothetical protein (1)                                                    |                                                                                                                                                                                                                               |                                                                                                                                                                                                                                                                                  |                                 |                              | P_trifoliata_00100_mRNA_39.1    |
| GF0045298 | 0                            | 0                         | 1                            | Hypothetical protein (1)                                                    |                                                                                                                                                                                                                               |                                                                                                                                                                                                                                                                                  |                                 |                              | P_trifoliata_00100_mRNA_19.1    |
| GF0045297 | 0                            | 0                         | 1                            | Hypothetical protein (1)                                                    |                                                                                                                                                                                                                               |                                                                                                                                                                                                                                                                                  |                                 |                              | P_trifoliata_00100_mRNA_16.1    |
| GF0045296 | 0                            | 0                         | 1                            | Hypothetical protein (1)                                                    |                                                                                                                                                                                                                               |                                                                                                                                                                                                                                                                                  |                                 |                              | P_trifoliata_00100_mRNA_15.1    |
| GF0045295 | 0                            | 0                         | 1                            | Hypothetical protein (1)                                                    |                                                                                                                                                                                                                               | Myo-inositol-1-phosphate synthase, GAPDH-like [IPR013021] (1)                                                                                                                                                                                                                    |                                 |                              | P_trifoliata_00100_mRNA_1.1     |
| GF0045294 | 0                            | 0                         | 1                            | Hypothetical protein (1)                                                    | mRNA splicing, via spliceosome [GO:0000398]<br>biological_process (1); spliceosomal complex [GO:0000568]<br>cellular_component (1)                                                                                            | Dam1 family [IPR004123] (1);<br>Thioredoxin-like fold [IPR012336] (1)                                                                                                                                                                                                            |                                 |                              | P_trifoliata_00099_mRNA_8.1     |
| GF0045293 | 0                            | 0                         | 1                            | Hypothetical protein (1)                                                    | ADP binding [GO:0043531]<br>molecular_function (1)                                                                                                                                                                            | NB-ARC [IPR002182] (1); P-loop containing nucleoside triphosphate hydrolase [IPR027471] (1)                                                                                                                                                                                      |                                 |                              | P_trifoliata_00099_mRNA_77.1    |
| GF0045292 | 0                            | 0                         | 1                            | Hypothetical protein (1)                                                    |                                                                                                                                                                                                                               |                                                                                                                                                                                                                                                                                  |                                 |                              | P_trifoliata_00099_mRNA_7.1     |
| GF0045291 | 0                            | 0                         | 1                            | Hypothetical protein (1)                                                    | binding [GO:0005488]<br>molecular_function (1)                                                                                                                                                                                | Armadillo-like helical [IPR011989] (1);<br>Domain of unknown function DUF3087 [IPR021420] (1); Armadillo-type fold [IPR016024] (1)                                                                                                                                               |                                 |                              | P_trifoliata_00099_mRNA_59.1    |
| GF0045290 | 0                            | 0                         | 1                            | Hypothetical protein (1)                                                    |                                                                                                                                                                                                                               |                                                                                                                                                                                                                                                                                  |                                 |                              | P_trifoliata_00099_mRNA_46.1    |
| GF0045289 | 0                            | 0                         | 1                            | Hypothetical protein (1)                                                    |                                                                                                                                                                                                                               |                                                                                                                                                                                                                                                                                  |                                 |                              | P_trifoliata_00099_mRNA_45.1    |
| GF0045288 | 0                            | 0                         | 1                            | LRR receptor-like kinase (1)                                                | protein binding [GO:0005515]<br>molecular_function (1)                                                                                                                                                                        | Leucine-rich repeat, typical subtype [IPR005911] (1); Leucine-rich repeat domain, L domain-like [IPR032675] (1);<br>Protein kinase-like domain [IPR011009] (1);<br>Leucine-rich repeat [IPR001611] (1);<br>Leucine-rich repeat-containing N-terminal, plant-type [IPR013210] (1) |                                 |                              | P_trifoliata_00099_mRNA_42.1    |
| GF0045287 | 0                            | 0                         | 1                            | Ribonuclease H protein (1)                                                  |                                                                                                                                                                                                                               | Reverse transcriptase zinc-binding domain [IPR026960] (1)                                                                                                                                                                                                                        |                                 |                              | P_trifoliata_00099_mRNA_31.1    |
| GF0045286 | 0                            | 0                         | 1                            | Hypothetical protein (1)                                                    |                                                                                                                                                                                                                               |                                                                                                                                                                                                                                                                                  |                                 |                              | P_trifoliata_00099_mRNA_30.1    |



| ID        | Num. in <i>C. clementiae</i> | Num. in <i>C. canthii</i> | Num. in <i>P. trifoliate</i> | Note                                                     | GO                                                                                                                                                                                                                                                                                                                                                                                                                                                                                                                                                                                                                 | InterPro                                                                                                                                                                                                                            | Members in <i>C. clementiae</i> | Members in <i>C. canthii</i> | Members in <i>P. trifoliate</i> |
|-----------|------------------------------|---------------------------|------------------------------|----------------------------------------------------------|--------------------------------------------------------------------------------------------------------------------------------------------------------------------------------------------------------------------------------------------------------------------------------------------------------------------------------------------------------------------------------------------------------------------------------------------------------------------------------------------------------------------------------------------------------------------------------------------------------------------|-------------------------------------------------------------------------------------------------------------------------------------------------------------------------------------------------------------------------------------|---------------------------------|------------------------------|---------------------------------|
| GF0045214 | 0                            | 0                         | 1                            | Seryl-tRNA synthetase / serine-tRNA ligase isoform 1 (1) | aminoacyl-tRNA ligase activity [GO:0004812 molecular_function] (1); seryl-tRNA aminoacylation [GO:006434 biological_process] (1); serine-tRNA ligase activity [GO:0004828 molecular_function] (1); cytoplasm [GO:0005737 cellular_component] (1); tRNA aminoacylation for protein translation [GO:0006418 biological_process] (1); ATP binding [GO:000524 molecular_function] (1); nucleotide binding [GO:0000166 molecular_function] (1); protein kinase binding [GO:0019901 molecular_function] (1); regulation of cyclin-dependent protein serine/threonine kinase activity [GO:0000079 biological_process] (1) | Aminoacyl-tRNA synthetase, class II (G/P/S/T) [IPR002314] (1); Cyclin PH080-like [IPR013922] (1); Cyclin-like [IPR013763] (1); Serine-tRNA ligase, type 1 [IPR002317] (1); Aminoacyl-tRNA synthetase, class II [IPR006195] (1)      | -                               | -                            | P_trifoliata_00093_mRNA_23.1    |
| GF0045213 | 0                            | 0                         | 1                            | Hypothetical protein (1)                                 |                                                                                                                                                                                                                                                                                                                                                                                                                                                                                                                                                                                                                    |                                                                                                                                                                                                                                     | -                               | -                            | P_trifoliata_00093_mRNA_24.1    |
| GF0045212 | 0                            | 0                         | 1                            | Hypothetical protein (1)                                 |                                                                                                                                                                                                                                                                                                                                                                                                                                                                                                                                                                                                                    |                                                                                                                                                                                                                                     | -                               | -                            | P_trifoliata_00093_mRNA_23.1    |
| GF0045211 | 0                            | 0                         | 1                            | Truncated RB (1)                                         | ADP binding [GO:0043331 molecular_function] (1)                                                                                                                                                                                                                                                                                                                                                                                                                                                                                                                                                                    | NB-ARC [IPR002182] (1); P-loop containing nucleoside triphosphate hydrolase [IPR027417] (1)                                                                                                                                         | -                               | -                            | P_trifoliata_00093_mRNA_22.1    |
| GF0045210 | 0                            | 0                         | 1                            | Hypothetical protein (1)                                 |                                                                                                                                                                                                                                                                                                                                                                                                                                                                                                                                                                                                                    |                                                                                                                                                                                                                                     | -                               | -                            | P_trifoliata_00093_mRNA_20.1    |
| GF0045209 | 0                            | 0                         | 1                            | Hypothetical protein (1)                                 |                                                                                                                                                                                                                                                                                                                                                                                                                                                                                                                                                                                                                    |                                                                                                                                                                                                                                     | -                               | -                            | P_trifoliata_00092_mRNA_99.1    |
| GF0045208 | 0                            | 0                         | 1                            | Cytochrome P450 87A3 (1)                                 | heme binding [GO:0020037 molecular_function] (1); iron ion binding [GO:0005506 molecular_function] (1); oxidoreductase activity, acting on paired donors, with incorporation or reduction of molecular oxygen [GO:0016705 molecular_function] (1); oxidation-reduction process [GO:0055114 biological_process] (1)                                                                                                                                                                                                                                                                                                 | Cytochrome P450 [IPR001128] (1); Cytochrome P450, G-class, group 1 [IPR002401] (1); Cytochrome P450, conserved site [IPR017972] (1)                                                                                                 | -                               | -                            | P_trifoliata_00092_mRNA_97.1    |
| GF0045207 | 0                            | 0                         | 1                            | Hypothetical protein (1)                                 |                                                                                                                                                                                                                                                                                                                                                                                                                                                                                                                                                                                                                    |                                                                                                                                                                                                                                     | -                               | -                            | P_trifoliata_00092_mRNA_96.1    |
| GF0045206 | 0                            | 0                         | 1                            | Hypothetical protein (1)                                 | iron ion binding [GO:0005506 molecular_function] (1); heme binding [GO:0020037 molecular_function] (1); oxidoreductase activity, acting on paired donors, with incorporation or reduction of molecular oxygen [GO:0016705 molecular_function] (1); oxidation-reduction process [GO:0055114 biological_process] (1)                                                                                                                                                                                                                                                                                                 | Cytochrome P450 [IPR001128] (1)                                                                                                                                                                                                     | -                               | -                            | P_trifoliata_00092_mRNA_95.1    |
| GF0045205 | 0                            | 0                         | 1                            | Hypothetical protein (1)                                 | oxidation-reduction process [GO:0055114 biological_process] (1); oxidoreductase activity, acting on paired donors, with incorporation or reduction of molecular oxygen [GO:0016705 molecular_function] (1); iron ion binding [GO:0005506 molecular_function] (1); heme binding [GO:0020037 molecular_function] (1)                                                                                                                                                                                                                                                                                                 | Cytochrome P450 [IPR001128] (1)                                                                                                                                                                                                     | -                               | -                            | P_trifoliata_00092_mRNA_94.1    |
| GF0045204 | 0                            | 0                         | 1                            | Hypothetical protein (1)                                 | oxidoreductase activity, acting on paired donors, with incorporation or reduction of molecular oxygen [GO:0016705 molecular_function] (1); oxidation-reduction process [GO:0055114 biological_process] (1); iron ion binding [GO:0005506 molecular_function] (1); heme binding [GO:0020037 molecular_function] (1)                                                                                                                                                                                                                                                                                                 | Cytochrome P450 [IPR001128] (1)                                                                                                                                                                                                     | -                               | -                            | P_trifoliata_00092_mRNA_93.1    |
| GF0045203 | 0                            | 0                         | 1                            | Hypothetical protein (1)                                 |                                                                                                                                                                                                                                                                                                                                                                                                                                                                                                                                                                                                                    |                                                                                                                                                                                                                                     | -                               | -                            | P_trifoliata_00092_mRNA_90.1    |
| GF0045202 | 0                            | 0                         | 1                            | Hypothetical protein (1)                                 | trichalose metabolic process [GO:0005991 biological_process] (1); catalytic activity [GO:0003824 molecular_function] (1); alpha,alpha-trichalose activity [GO:0004555 molecular_function] (1)                                                                                                                                                                                                                                                                                                                                                                                                                      | Six-hairpin glycosidase-like [IPR008928] (1); Glycoside hydrolase, family 37 [IPR01661] (1)                                                                                                                                         | -                               | -                            | P_trifoliata_00092_mRNA_9.1     |
| GF0045201 | 0                            | 0                         | 1                            | Mitochondrial substrate carrier family protein B (1)     | transmembrane transport [GO:0055085 biological_process] (1)                                                                                                                                                                                                                                                                                                                                                                                                                                                                                                                                                        | Mitochondrial carrier protein [IPR002067] (1); Mitochondrial carrier domain [IPR023395] (1); Mitochondrial substrate-carrier carrier [IPR013108] (1)                                                                                | -                               | -                            | P_trifoliata_00092_mRNA_88.1    |
| GF0045200 | 0                            | 0                         | 1                            | Alpha,alpha-trichalose (1)                               | alpha,alpha-trichalose activity [GO:0004555 molecular_function] (1); catalytic activity [GO:0003824 molecular_function] (1); trichalose metabolic process [GO:0005991 biological_process] (1)                                                                                                                                                                                                                                                                                                                                                                                                                      | Six-hairpin glycosidase-like [IPR008928] (1); Glycoside hydrolase, family 37, conserved site [IPR018232] (1); Glycoside hydrolase, family 37 [IPR01661] (1)                                                                         | -                               | -                            | P_trifoliata_00092_mRNA_8.1     |
| GF0045199 | 0                            | 0                         | 1                            | Glycoside hydrolase family 28 protein (1)                | polyglutaraminase activity [GO:0004650 molecular_function] (1); carboxylate metabolic process [GO:0005975 biological_process] (1)                                                                                                                                                                                                                                                                                                                                                                                                                                                                                  | Parallel beta-helix repeat [IPR06626] (1); Glycoside hydrolase, family 28 [IPR000743] (1); Pectin lyase fold/virulence factor [IPR011050] (1); Pectin lyase fold [IPR012384] (1); Pectate lyase superfamily protein [IPR024535] (1) | -                               | -                            | P_trifoliata_00092_mRNA_74.1    |
| GF0045198 | 0                            | 0                         | 1                            | Hypothetical protein (1)                                 |                                                                                                                                                                                                                                                                                                                                                                                                                                                                                                                                                                                                                    |                                                                                                                                                                                                                                     | -                               | -                            | P_trifoliata_00092_mRNA_73.1    |
| GF0045197 | 0                            | 0                         | 1                            | Hypothetical protein (1)                                 | trichalose metabolic process [GO:0005991 biological_process] (1); catalytic activity [GO:0003824 molecular_function] (1); alpha,alpha-trichalose activity [GO:0004555 molecular_function] (1)                                                                                                                                                                                                                                                                                                                                                                                                                      | Glycoside hydrolase, family 37 [IPR01661] (1); Six-hairpin glycosidase-like [IPR008928] (1)                                                                                                                                         | -                               | -                            | P_trifoliata_00092_mRNA_7.1     |
| GF0045196 | 0                            | 0                         | 1                            | Hypothetical protein (1)                                 |                                                                                                                                                                                                                                                                                                                                                                                                                                                                                                                                                                                                                    |                                                                                                                                                                                                                                     | -                               | -                            | P_trifoliata_00092_mRNA_66.1    |
| GF0045195 | 0                            | 0                         | 1                            | Hypothetical protein (1)                                 |                                                                                                                                                                                                                                                                                                                                                                                                                                                                                                                                                                                                                    |                                                                                                                                                                                                                                     | -                               | -                            | P_trifoliata_00092_mRNA_62.1    |
| GF0045194 | 0                            | 0                         | 1                            | Hypothetical protein (1)                                 |                                                                                                                                                                                                                                                                                                                                                                                                                                                                                                                                                                                                                    |                                                                                                                                                                                                                                     | -                               | -                            | P_trifoliata_00092_mRNA_61.1    |
| GF0045193 | 0                            | 0                         | 1                            | Hypothetical protein (1)                                 |                                                                                                                                                                                                                                                                                                                                                                                                                                                                                                                                                                                                                    |                                                                                                                                                                                                                                     | -                               | -                            | P_trifoliata_00092_mRNA_60.1    |
| GF0045192 | 0                            | 0                         | 1                            | Hypothetical protein (1)                                 |                                                                                                                                                                                                                                                                                                                                                                                                                                                                                                                                                                                                                    |                                                                                                                                                                                                                                     | -                               | -                            | P_trifoliata_00092_mRNA_6.1     |
| GF0045191 | 0                            | 0                         | 1                            | Putative RING-H2 finger protein ATL21A (1)               | zinc ion binding [GO:0000270 molecular_function] (1); protein binding [GO:0005515 molecular_function] (1)                                                                                                                                                                                                                                                                                                                                                                                                                                                                                                          | Zinc finger, RING-type [IPR001841] (1); Zinc finger, RING/PVVE/PHD-type [IPR013083] (1)                                                                                                                                             | -                               | -                            | P_trifoliata_00092_mRNA_59.1    |
| GF0045190 | 0                            | 0                         | 1                            | Plectestrin-like (PH) domain protein (1)                 |                                                                                                                                                                                                                                                                                                                                                                                                                                                                                                                                                                                                                    | PH domain-like [IPR011993] (1); Plectestrin homology domain [IPR001849] (1)                                                                                                                                                         | -                               | -                            | P_trifoliata_00092_mRNA_52.1    |
| GF0045189 | 0                            | 0                         | 1                            | Nucleoside diphosphate kinase (1)                        | CTP biosynthetic process [GO:0006241 biological_process] (1); UTP biosynthetic process [GO:0006228 biological_process] (1); nucleoside diphosphate phosphorylation [GO:0006165 biological_process] (1); nucleoside diphosphate kinase activity [GO:0004550 molecular_function] (1); GTP biosynthetic process [GO:0006183 biological_process] (1)                                                                                                                                                                                                                                                                   | Nucleoside diphosphate kinase [IPR001564] (1); Nucleoside diphosphate kinase, active site [IPR023005] (1)                                                                                                                           | -                               | -                            | P_trifoliata_00092_mRNA_51.1    |
| GF0045188 | 0                            | 0                         | 1                            | Hypothetical protein (1)                                 |                                                                                                                                                                                                                                                                                                                                                                                                                                                                                                                                                                                                                    |                                                                                                                                                                                                                                     | -                               | -                            | P_trifoliata_00092_mRNA_5.1     |
| GF0045187 | 0                            | 0                         | 1                            | Hypothetical protein (1)                                 |                                                                                                                                                                                                                                                                                                                                                                                                                                                                                                                                                                                                                    |                                                                                                                                                                                                                                     | -                               | -                            | P_trifoliata_00092_mRNA_49.1    |
| GF0045186 | 0                            | 0                         | 1                            | Hypothetical protein (1)                                 |                                                                                                                                                                                                                                                                                                                                                                                                                                                                                                                                                                                                                    | ElonginA binding protein 1 [IPR017356] (1)                                                                                                                                                                                          | -                               | -                            | P_trifoliata_00092_mRNA_41.1    |
| GF0045185 | 0                            | 0                         | 1                            | Hypothetical protein (1)                                 |                                                                                                                                                                                                                                                                                                                                                                                                                                                                                                                                                                                                                    |                                                                                                                                                                                                                                     | -                               | -                            | P_trifoliata_00092_mRNA_3.1     |
| GF0045184 | 0                            | 0                         | 1                            | Hypothetical protein (1)                                 | protein binding [GO:0005515 molecular_function] (1)                                                                                                                                                                                                                                                                                                                                                                                                                                                                                                                                                                | PBI domain [IPR000270] (1)                                                                                                                                                                                                          | -                               | -                            | P_trifoliata_00092_mRNA_22.1    |
| GF0045183 | 0                            | 0                         | 1                            | Hypothetical protein (1)                                 |                                                                                                                                                                                                                                                                                                                                                                                                                                                                                                                                                                                                                    |                                                                                                                                                                                                                                     | -                               | -                            | P_trifoliata_00092_mRNA_17.1    |
| GF0045182 | 0                            | 0                         | 1                            | Hypothetical protein (1)                                 |                                                                                                                                                                                                                                                                                                                                                                                                                                                                                                                                                                                                                    |                                                                                                                                                                                                                                     | -                               | -                            | P_trifoliata_00092_mRNA_14.1    |
| GF0045181 | 0                            | 0                         | 1                            | Hypothetical protein (1)                                 |                                                                                                                                                                                                                                                                                                                                                                                                                                                                                                                                                                                                                    | Aspartic peptidase domain [IPR021109] (1)                                                                                                                                                                                           | -                               | -                            | P_trifoliata_00092_mRNA_13.1    |
| GF0045180 | 0                            | 0                         | 1                            | Hypothetical protein (1)                                 |                                                                                                                                                                                                                                                                                                                                                                                                                                                                                                                                                                                                                    |                                                                                                                                                                                                                                     | -                               | -                            | P_trifoliata_00092_mRNA_113.1   |
| GF0045179 | 0                            | 0                         | 1                            | Hypothetical protein (1)                                 |                                                                                                                                                                                                                                                                                                                                                                                                                                                                                                                                                                                                                    |                                                                                                                                                                                                                                     | -                               | -                            | P_trifoliata_00092_mRNA_109.1   |
| GF0045178 | 0                            | 0                         | 1                            | Hypothetical protein (1)                                 |                                                                                                                                                                                                                                                                                                                                                                                                                                                                                                                                                                                                                    |                                                                                                                                                                                                                                     | -                               | -                            | P_trifoliata_00092_mRNA_108.1   |
| GF0045177 | 0                            | 0                         | 1                            | Hypothetical protein (1)                                 |                                                                                                                                                                                                                                                                                                                                                                                                                                                                                                                                                                                                                    |                                                                                                                                                                                                                                     | -                               | -                            | P_trifoliata_00092_mRNA_106.1   |
| GF0045176 | 0                            | 0                         | 1                            | Hypothetical protein (1)                                 |                                                                                                                                                                                                                                                                                                                                                                                                                                                                                                                                                                                                                    |                                                                                                                                                                                                                                     | -                               | -                            | P_trifoliata_00092_mRNA_103.1   |
| GF0045175 | 0                            | 0                         | 1                            | Flavonoid 3'-monooxygenase (1)                           | iron ion binding [GO:0005506 molecular_function] (1); heme binding [GO:0020037 molecular_function] (1); oxidation-reduction process [GO:0055114 biological_process] (1); oxidoreductase activity, acting on paired donors, with incorporation or reduction of molecular oxygen [GO:0016705 molecular_function] (1)                                                                                                                                                                                                                                                                                                 | Cytochrome P450 [IPR001128] (1)                                                                                                                                                                                                     | -                               | -                            | P_trifoliata_00092_mRNA_100.1   |
| GF0045174 | 0                            | 0                         | 1                            | Hypothetical protein (1)                                 |                                                                                                                                                                                                                                                                                                                                                                                                                                                                                                                                                                                                                    |                                                                                                                                                                                                                                     | -                               | -                            | P_trifoliata_00092_mRNA_10.1    |
| GF0045173 | 0                            | 0                         | 1                            | Hemexbox prospero (1)                                    |                                                                                                                                                                                                                                                                                                                                                                                                                                                                                                                                                                                                                    |                                                                                                                                                                                                                                     | -                               | -                            | P_trifoliata_00091_mRNA_90.1    |
| GF0045172 | 0                            | 0                         | 1                            | Transformer serine/arginine-rich ribonucleoprotein (1)   | nucleotide binding [GO:0000166 molecular_function] (1)                                                                                                                                                                                                                                                                                                                                                                                                                                                                                                                                                             | Nucleoside-binding alpha-beta plait domain [IPR012677] (1)                                                                                                                                                                          | -                               | -                            | P_trifoliata_00091_mRNA_86.1    |

| ID        | Num. in <i>C. celeratae</i> | Num. in <i>C. canthii</i> | Num. in <i>P. trifoliata</i> | Note                                                               | GO                                                                                                                                                                                                                                                                                                                                                                           | InterPro                                                                                                                                                                                                                                                                           | Members in <i>C. celeratae</i> | Members in <i>C. canthii</i> | Members in <i>P. trifoliata</i> |
|-----------|-----------------------------|---------------------------|------------------------------|--------------------------------------------------------------------|------------------------------------------------------------------------------------------------------------------------------------------------------------------------------------------------------------------------------------------------------------------------------------------------------------------------------------------------------------------------------|------------------------------------------------------------------------------------------------------------------------------------------------------------------------------------------------------------------------------------------------------------------------------------|--------------------------------|------------------------------|---------------------------------|
| GF0045171 | 0                           | 0                         | 1                            | Tubulin beta-3 chain (1)                                           | microtubule-based process [GO:007017 biological_process] (1); structural constituent of cytoskeleton [GO:006206 molecular_function] (1); microtubule [GO:0005874 cellular_component] (1); GTP binding [GO:000525 molecular_function] (1)                                                                                                                                     | Beta tubulin [IPR002453] (1); Tubulin/PaZ, C-terminal [IPR008280] (1); Tubulin [IPR002171] (1); Tubulin/PaZ, 2-layer sandwich domain [IPR018316] (1); Tubulin, C-terminal [IPR021323] (1)                                                                                          | -                              | -                            | P_trifoliata_00091_mRNA_76,1    |
| GF0045170 | 0                           | 0                         | 1                            | Hypothetical protein (1)                                           | metabolic process [GO:0008152 biological_process] (1); transferase activity, transferring hexose groups [GO:0016758 molecular_function] (1)                                                                                                                                                                                                                                  | UDP-glucuronosylUDP-glucosyltransferase [IPR002213] (1)                                                                                                                                                                                                                            | -                              | -                            | P_trifoliata_00091_mRNA_69,1    |
| GF0045168 | 0                           | 0                         | 1                            | Hypothetical protein (1)                                           | protein binding [GO:0005515 molecular_function] (1)                                                                                                                                                                                                                                                                                                                          | Glutathione S-transferase, N-terminal [IPR040453] (1); Glutathione S-transferase, C-terminal-like [IPR010987] (1); Glutathione S-transferase, C-terminal [IPR040446] (1); Thioredoxin-like fold [IPR012336] (1)                                                                    | -                              | -                            | P_trifoliata_00091_mRNA_56,1    |
| GF0045167 | 0                           | 0                         | 1                            | Hypothetical protein (1)                                           | protein binding [GO:0005515 molecular_function] (1)                                                                                                                                                                                                                                                                                                                          | Glutathione S-transferase, C-terminal-like [IPR010987] (1); Glutathione S-transferase, N-terminal [IPR040453] (1); Thioredoxin-like fold [IPR012336] (1)                                                                                                                           | -                              | -                            | P_trifoliata_00091_mRNA_55,1    |
| GF0045166 | 0                           | 0                         | 1                            | Glutathione S-transferase GST 18 (1)                               | protein binding [GO:0005515 molecular_function] (1)                                                                                                                                                                                                                                                                                                                          | Glutathione S-transferase, C-terminal-like [IPR010987] (1); Glutathione S-transferase, N-terminal [IPR040453] (1); Thioredoxin-like fold [IPR012336] (1)                                                                                                                           | -                              | -                            | P_trifoliata_00091_mRNA_54,1    |
| GF0045165 | 0                           | 0                         | 1                            | Hypothetical protein (1)                                           | multicellular organismal development [GO:0007275 biological_process] (1)                                                                                                                                                                                                                                                                                                     | YABBY protein [IPR006780] (1)                                                                                                                                                                                                                                                      | -                              | -                            | P_trifoliata_00091_mRNA_4,1     |
| GF0045164 | 0                           | 0                         | 1                            | Hypothetical protein (1)                                           |                                                                                                                                                                                                                                                                                                                                                                              |                                                                                                                                                                                                                                                                                    | -                              | -                            | P_trifoliata_00091_mRNA_33,1    |
| GF0045163 | 0                           | 0                         | 1                            | Hypothetical protein (1)                                           |                                                                                                                                                                                                                                                                                                                                                                              |                                                                                                                                                                                                                                                                                    | -                              | -                            | P_trifoliata_00091_mRNA_30,1    |
| GF0045162 | 0                           | 0                         | 1                            | Hypothetical protein (1)                                           |                                                                                                                                                                                                                                                                                                                                                                              |                                                                                                                                                                                                                                                                                    | -                              | -                            | P_trifoliata_00091_mRNA_3,1     |
| GF0045161 | 0                           | 0                         | 1                            | Hypothetical protein (1)                                           |                                                                                                                                                                                                                                                                                                                                                                              |                                                                                                                                                                                                                                                                                    | -                              | -                            | P_trifoliata_00091_mRNA_24,1    |
| GF0045160 | 0                           | 0                         | 1                            | Hypothetical protein (1)                                           | microtubule-based movement [GO:0007018 biological_process] (1); microtubule motor activity [GO:0003777 molecular_function] (1)                                                                                                                                                                                                                                               | Kinesin-like protein [IPR027640] (1); NPK1-activating kinesin-like protein, C-terminal [IPR021881] (1)                                                                                                                                                                             | -                              | -                            | P_trifoliata_00090_mRNA_5,1     |
| GF0045159 | 0                           | 0                         | 1                            | Hypothetical protein (1)                                           | NADP binding [GO:0050661 molecular_function] (1); N,N-dimethylamine monoxygenase activity [GO:0004499 molecular_function] (1); flavin adenine dinucleotide binding [GO:0005060 molecular_function] (1); oxidoreductase activity [GO:0016001 molecular_function] (1); oxidation-reduction process [GO:0055114 biological_process] (1)                                         | FAD/NAD(P)-binding domain [IPR023751] (1); Flavin monoxygenase-like [IPR020946] (1)                                                                                                                                                                                                | -                              | -                            | P_trifoliata_00090_mRNA_40,1    |
| GF0045158 | 0                           | 0                         | 1                            | Sucrose synthase (1)                                               | sucrose synthase activity [GO:0016157 molecular_function] (1); sucrose metabolic process [GO:0005985 biological_process] (1)                                                                                                                                                                                                                                                 | Sucrose synthase [IPR000368] (1); Glycosyl transferase, family 1 [IPR001296] (1)                                                                                                                                                                                                   | -                              | -                            | P_trifoliata_00090_mRNA_4,1     |
| GF0045157 | 0                           | 0                         | 1                            | Hypothetical protein (1)                                           |                                                                                                                                                                                                                                                                                                                                                                              |                                                                                                                                                                                                                                                                                    | -                              | -                            | P_trifoliata_00090_mRNA_37,1    |
| GF0045156 | 0                           | 0                         | 1                            | Hypothetical protein (1)                                           |                                                                                                                                                                                                                                                                                                                                                                              | Modifier of rudimentary, Modr [IPR009851] (1)                                                                                                                                                                                                                                      | -                              | -                            | P_trifoliata_00090_mRNA_3,1     |
| GF0045155 | 0                           | 0                         | 1                            | Hypothetical protein (1)                                           |                                                                                                                                                                                                                                                                                                                                                                              |                                                                                                                                                                                                                                                                                    | -                              | -                            | P_trifoliata_00090_mRNA_22,1    |
| GF0045154 | 0                           | 0                         | 1                            | Hypothetical protein (1)                                           | proteolysis [GO:0006508 biological_process] (1); cysteine-type peptidase activity [GO:0008234 molecular_function] (1)                                                                                                                                                                                                                                                        | Ulp1 protease family, C-terminal catalytic domain [IPR036553] (1); High mobility group box domain [IPR009071] (1)                                                                                                                                                                  | -                              | -                            | P_trifoliata_00090_mRNA_2,1     |
| GF0045153 | 0                           | 0                         | 1                            | Hypothetical protein (1)                                           |                                                                                                                                                                                                                                                                                                                                                                              |                                                                                                                                                                                                                                                                                    | -                              | -                            | P_trifoliata_00090_mRNA_19,1    |
| GF0045152 | 0                           | 0                         | 1                            | Hypothetical protein (1)                                           |                                                                                                                                                                                                                                                                                                                                                                              | S-adenosyl-L-methionine-dependent methyltransferase [IPR029063] (1)                                                                                                                                                                                                                | -                              | -                            | P_trifoliata_00089_mRNA_9,1     |
| GF0045151 | 0                           | 0                         | 1                            | Hypothetical protein (1)                                           |                                                                                                                                                                                                                                                                                                                                                                              |                                                                                                                                                                                                                                                                                    | -                              | -                            | P_trifoliata_00089_mRNA_69,1    |
| GF0045150 | 0                           | 0                         | 1                            | Hypothetical protein (1)                                           |                                                                                                                                                                                                                                                                                                                                                                              |                                                                                                                                                                                                                                                                                    | -                              | -                            | P_trifoliata_00089_mRNA_63,1    |
| GF0045149 | 0                           | 0                         | 1                            | Hypothetical protein (1)                                           |                                                                                                                                                                                                                                                                                                                                                                              |                                                                                                                                                                                                                                                                                    | -                              | -                            | P_trifoliata_00089_mRNA_61,1    |
| GF0045148 | 0                           | 0                         | 1                            | Hypothetical protein (1)                                           |                                                                                                                                                                                                                                                                                                                                                                              |                                                                                                                                                                                                                                                                                    | -                              | -                            | P_trifoliata_00089_mRNA_57,1    |
| GF0045147 | 0                           | 0                         | 1                            | Hypothetical protein (1)                                           |                                                                                                                                                                                                                                                                                                                                                                              |                                                                                                                                                                                                                                                                                    | -                              | -                            | P_trifoliata_00089_mRNA_56,1    |
| GF0045146 | 0                           | 0                         | 1                            | NAC domain transcription factor, putative, expressed (1)           | DNA binding [GO:0003677 molecular_function] (1); regulation of transcription, DNA-templated [GO:0006355 biological_process] (1)                                                                                                                                                                                                                                              | NAC domain [IPR003441] (1)                                                                                                                                                                                                                                                         | -                              | -                            | P_trifoliata_00089_mRNA_5,1     |
| GF0045145 | 0                           | 0                         | 1                            | Hypothetical protein (1)                                           |                                                                                                                                                                                                                                                                                                                                                                              |                                                                                                                                                                                                                                                                                    | -                              | -                            | P_trifoliata_00089_mRNA_48,1    |
| GF0045144 | 0                           | 0                         | 1                            | Hypothetical protein (1)                                           |                                                                                                                                                                                                                                                                                                                                                                              |                                                                                                                                                                                                                                                                                    | -                              | -                            | P_trifoliata_00089_mRNA_43,1    |
| GF0045143 | 0                           | 0                         | 1                            | Hypothetical protein (1)                                           |                                                                                                                                                                                                                                                                                                                                                                              | Retrosposon gag domain [IPR005162] (1)                                                                                                                                                                                                                                             | -                              | -                            | P_trifoliata_00089_mRNA_34,1    |
| GF0045142 | 0                           | 0                         | 1                            | Hypothetical protein (1)                                           |                                                                                                                                                                                                                                                                                                                                                                              |                                                                                                                                                                                                                                                                                    | -                              | -                            | P_trifoliata_00089_mRNA_33,1    |
| GF0045141 | 0                           | 0                         | 1                            | Hypothetical protein (1)                                           | nucleic acid binding [GO:0003676 molecular_function] (1)                                                                                                                                                                                                                                                                                                                     | Ribonuclease H-like domain [IPR012373] (1)                                                                                                                                                                                                                                         | -                              | -                            | P_trifoliata_00089_mRNA_32,1    |
| GF0045140 | 0                           | 0                         | 1                            | Hypothetical protein (1)                                           |                                                                                                                                                                                                                                                                                                                                                                              |                                                                                                                                                                                                                                                                                    | -                              | -                            | P_trifoliata_00089_mRNA_28,1    |
| GF0045139 | 0                           | 0                         | 1                            | Hypothetical protein (1)                                           |                                                                                                                                                                                                                                                                                                                                                                              |                                                                                                                                                                                                                                                                                    | -                              | -                            | P_trifoliata_00089_mRNA_27,1    |
| GF0045138 | 0                           | 0                         | 1                            | Hypothetical protein (1)                                           |                                                                                                                                                                                                                                                                                                                                                                              |                                                                                                                                                                                                                                                                                    | -                              | -                            | P_trifoliata_00089_mRNA_22,1    |
| GF0045137 | 0                           | 0                         | 1                            | Hypothetical protein (1)                                           | DNA binding [GO:0003677 molecular_function] (1)                                                                                                                                                                                                                                                                                                                              | Zinc finger, BED-type [IPR003656] (1)                                                                                                                                                                                                                                              | -                              | -                            | P_trifoliata_00089_mRNA_21,1    |
| GF0045136 | 0                           | 0                         | 1                            | Hypothetical protein (1)                                           |                                                                                                                                                                                                                                                                                                                                                                              |                                                                                                                                                                                                                                                                                    | -                              | -                            | P_trifoliata_00089_mRNA_20,1    |
| GF0045135 | 0                           | 0                         | 1                            | Hypothetical protein (1)                                           | zinc ion binding [GO:0008270 molecular_function] (1); nucleic acid binding [GO:0003676 molecular_function] (1)                                                                                                                                                                                                                                                               | Zinc finger, CCHC-type [IPR01878] (1)                                                                                                                                                                                                                                              | -                              | -                            | P_trifoliata_00089_mRNA_19,1    |
| GF0045134 | 0                           | 0                         | 1                            | Hypothetical protein (1)                                           |                                                                                                                                                                                                                                                                                                                                                                              |                                                                                                                                                                                                                                                                                    | -                              | -                            | P_trifoliata_00089_mRNA_14,1    |
| GF0045133 | 0                           | 0                         | 1                            | Non-LTR retroelement reverse transcriptase-like (1)                | nucleic acid binding [GO:0003676 molecular_function] (1); RNA-DNA hybrid ribonuclease activity [GO:0004523 molecular_function] (1)                                                                                                                                                                                                                                           | Endonuclease/exonuclease/phosphatase [IPR005135] (1); Ribonuclease H-like domain [IPR012373] (1); Ribonuclease H domain [IPR002156] (1)                                                                                                                                            | -                              | -                            | P_trifoliata_00089_mRNA_11,1    |
| GF0045132 | 0                           | 0                         | 1                            | Hypothetical protein (1)                                           |                                                                                                                                                                                                                                                                                                                                                                              |                                                                                                                                                                                                                                                                                    | -                              | -                            | P_trifoliata_00089_mRNA_10,1    |
| GF0045131 | 0                           | 0                         | 1                            | Hypothetical protein (1)                                           |                                                                                                                                                                                                                                                                                                                                                                              |                                                                                                                                                                                                                                                                                    | -                              | -                            | P_trifoliata_00089_mRNA_1,1     |
| GF0045130 | 0                           | 0                         | 1                            | Hypothetical protein (1)                                           |                                                                                                                                                                                                                                                                                                                                                                              |                                                                                                                                                                                                                                                                                    | -                              | -                            | P_trifoliata_00088_mRNA_8,1     |
| GF0045129 | 0                           | 0                         | 1                            | Cytochrome P450 family 72 protein (1)                              | oxidoreductase activity, acting on paired donors, with incorporation or reduction of molecular oxygen [GO:0016705 molecular_function] (1); oxidation-reduction process [GO:0055114 biological_process] (1); monoxygenase activity [GO:0004497 molecular_function] (1); heme binding [GO:002007 molecular_function] (1); zinc ion binding [GO:0005506 molecular_function] (1) | Cytochrome P450, conserved site [IPR017972] (1); Cytochrome P450, E-class, group IV [IPR002403] (1); Cytochrome P450 [IPR001128] (1)                                                                                                                                               | -                              | -                            | P_trifoliata_00088_mRNA_74,1    |
| GF0045128 | 0                           | 0                         | 1                            | RNA-dependent RNA polymerase 2 (1)                                 | RNA-directed RNA polymerase activity [GO:0003968 molecular_function] (1)                                                                                                                                                                                                                                                                                                     | RNA-dependent RNA polymerase, eukaryotic-type [IPR007855] (1)                                                                                                                                                                                                                      | -                              | -                            | P_trifoliata_00088_mRNA_73,1    |
| GF0045127 | 0                           | 0                         | 1                            | Hypothetical protein (1)                                           |                                                                                                                                                                                                                                                                                                                                                                              |                                                                                                                                                                                                                                                                                    | -                              | -                            | P_trifoliata_00088_mRNA_71,1    |
| GF0045126 | 0                           | 0                         | 1                            | Hypothetical protein (1)                                           |                                                                                                                                                                                                                                                                                                                                                                              |                                                                                                                                                                                                                                                                                    | -                              | -                            | P_trifoliata_00088_mRNA_7,1     |
| GF0045125 | 0                           | 0                         | 1                            | Hypothetical protein (1)                                           |                                                                                                                                                                                                                                                                                                                                                                              |                                                                                                                                                                                                                                                                                    | -                              | -                            | P_trifoliata_00088_mRNA_69,1    |
| GF0045124 | 0                           | 0                         | 1                            | Hypothetical protein (1)                                           |                                                                                                                                                                                                                                                                                                                                                                              |                                                                                                                                                                                                                                                                                    | -                              | -                            | P_trifoliata_00088_mRNA_68,1    |
| GF0045123 | 0                           | 0                         | 1                            | Hypothetical protein (1)                                           |                                                                                                                                                                                                                                                                                                                                                                              |                                                                                                                                                                                                                                                                                    | -                              | -                            | P_trifoliata_00088_mRNA_61,1    |
| GF0045122 | 0                           | 0                         | 1                            | Chaperonin-like RbcX protein (1)                                   |                                                                                                                                                                                                                                                                                                                                                                              | Chaperonin-like RbcX [IPR003435] (1)                                                                                                                                                                                                                                               | -                              | -                            | P_trifoliata_00088_mRNA_56,1    |
| GF0045121 | 0                           | 0                         | 1                            | Orf105b protein (1)                                                |                                                                                                                                                                                                                                                                                                                                                                              |                                                                                                                                                                                                                                                                                    | -                              | -                            | P_trifoliata_00088_mRNA_5,1     |
| GF0045120 | 0                           | 0                         | 1                            | Bifunctional dihydroflavonol 4-reductase/flavanone 4-reductase (1) | 3-beta-hydroxy-delta5-steroid dehydrogenase activity [GO:0003854 molecular_function] (1); steroid biosynthetic process [GO:0006694 biological_process] (1); oxidation-reduction process [GO:0055114 biological_process] (1); oxidoreductase activity, acting on the C1-C11 group of donors, NAD or NADP as acceptor [GO:0016616 molecular_function] (1)                      | 3-beta hydroxysteroid dehydrogenase/isomerase [IPR002225] (1); NAD(P)-binding domain [IPR016040] (1)                                                                                                                                                                               | -                              | -                            | P_trifoliata_00088_mRNA_42,1    |
| GF0045119 | 0                           | 0                         | 1                            | membrane integral component of membrane                            | integral component of membrane [GO:0016021 cellular_component] (1); transport [GO:0006810 biological_process] (1); ATPase activity, coupled to transmembrane movement of substances [GO:0042626 molecular_function] (1); transmembrane transport [GO:0055085 biological_process] (1); ATP binding [GO:0005524 molecular_function] (1)                                        | Protein of unknown function DUF604 [IPR006740] (1)                                                                                                                                                                                                                                 | -                              | -                            | P_trifoliata_00088_mRNA_38,1    |
| GF0045118 | 0                           | 0                         | 1                            | Hypothetical protein (1)                                           |                                                                                                                                                                                                                                                                                                                                                                              | ABC transporter type 1, transmembrane domain [IPR011527] (1)                                                                                                                                                                                                                       | -                              | -                            | P_trifoliata_00088_mRNA_36,1    |
| GF0045117 | 0                           | 0                         | 1                            | Hypothetical protein (1)                                           | ATPase activity [GO:0016887 molecular_function] (1); ATP binding [GO:0005524 molecular_function] (1)                                                                                                                                                                                                                                                                         | ABC transporter-like [IPR003439] (1); P-loop containing nucleoside triphosphate hydrolase [IPR027417] (1)                                                                                                                                                                          | -                              | -                            | P_trifoliata_00088_mRNA_35,1    |
| GF0045116 | 0                           | 0                         | 1                            | Hypothetical protein (1)                                           |                                                                                                                                                                                                                                                                                                                                                                              |                                                                                                                                                                                                                                                                                    | -                              | -                            | P_trifoliata_00088_mRNA_3,1     |
| GF0045115 | 0                           | 0                         | 1                            | Hypothetical protein (1)                                           |                                                                                                                                                                                                                                                                                                                                                                              |                                                                                                                                                                                                                                                                                    | -                              | -                            | P_trifoliata_00088_mRNA_27,1    |
| GF0045114 | 0                           | 0                         | 1                            | Hypothetical protein (1)                                           |                                                                                                                                                                                                                                                                                                                                                                              |                                                                                                                                                                                                                                                                                    | -                              | -                            | P_trifoliata_00088_mRNA_26,1    |
| GF0045113 | 0                           | 0                         | 1                            | Caffeic acid 3-O-methyltransferase (1)                             | methyltransferase activity [GO:0008168 molecular_function] (1); protein dimerization activity [GO:0040983 molecular_function] (1); O-methyltransferase activity [GO:0008171 molecular_function] (1)                                                                                                                                                                          | O-methyltransferase COMT-type [IPR016461] (1); Plant methyltransferase dimerization [IPR012967] (1); O-methyltransferase, family 2 [IPR01077] (1); Winged helix-trans-beta DNA-binding domain [IPR011991] (1); S-adenosyl-L-methionine-dependent methyltransferase [IPR029063] (1) | -                              | -                            | P_trifoliata_00088_mRNA_25,1    |



| ID        | Num. in <i>C. clementiae</i> | Num. in <i>C. canihii</i> | Num. in <i>P. trifoliata</i> | Note                                                        | GO                                                                                                                                                                                                                                                                                                                                                                                | InterPro                                                                                                                                                                                                                                                                                                                                                  | Members in <i>C. clementiae</i> | Members in <i>C. canihii</i> | Members in <i>P. trifoliata</i> |
|-----------|------------------------------|---------------------------|------------------------------|-------------------------------------------------------------|-----------------------------------------------------------------------------------------------------------------------------------------------------------------------------------------------------------------------------------------------------------------------------------------------------------------------------------------------------------------------------------|-----------------------------------------------------------------------------------------------------------------------------------------------------------------------------------------------------------------------------------------------------------------------------------------------------------------------------------------------------------|---------------------------------|------------------------------|---------------------------------|
| GF0045112 | 0                            | 0                         | 1                            | Hypothetical protein (1)                                    |                                                                                                                                                                                                                                                                                                                                                                                   |                                                                                                                                                                                                                                                                                                                                                           | -                               | -                            | P_trifoliata_00088_mRNA_22.1    |
| GF0045111 | 0                            | 0                         | 1                            | Hypothetical protein (1)                                    |                                                                                                                                                                                                                                                                                                                                                                                   |                                                                                                                                                                                                                                                                                                                                                           | -                               | -                            | P_trifoliata_00088_mRNA_21.1    |
| GF0045110 | 0                            | 0                         | 1                            | Hypothetical protein (1)                                    |                                                                                                                                                                                                                                                                                                                                                                                   |                                                                                                                                                                                                                                                                                                                                                           | -                               | -                            | P_trifoliata_00088_mRNA_2.1     |
| GF0045109 | 0                            | 0                         | 1                            | RNA-binding protein 8A (1)                                  | RNA processing [GO:0006396 biological_process] (1); nucleic acid binding [GO:0003676 molecular_function] (1); nucleoside binding [GO:0000166 molecular_function] (1); RNA binding [GO:0007723 molecular_function] (1); nucleus [GO:0005634 cellular_component] (1); cytoplasm [GO:0005737 cellular_component] (1)                                                                 | RNA-binding motif protein 8 [IPR00811] (1); RNA recognition motif domain [IPR00904] (1); Nucleoside-binding alpha-beta plat domain [IPR012677] (1)                                                                                                                                                                                                        | -                               | -                            | P_trifoliata_00088_mRNA_11.1    |
| GF0045108 | 0                            | 0                         | 1                            | Hypothetical protein (1)                                    |                                                                                                                                                                                                                                                                                                                                                                                   |                                                                                                                                                                                                                                                                                                                                                           | -                               | -                            | P_trifoliata_00088_mRNA_1.1     |
| GF0045107 | 0                            | 0                         | 1                            | Monosaccharide transport protein (1)                        |                                                                                                                                                                                                                                                                                                                                                                                   |                                                                                                                                                                                                                                                                                                                                                           | -                               | -                            | P_trifoliata_00087_mRNA_70.1    |
| GF0045106 | 0                            | 0                         | 1                            | Hypothetical protein (1)                                    |                                                                                                                                                                                                                                                                                                                                                                                   |                                                                                                                                                                                                                                                                                                                                                           | -                               | -                            | P_trifoliata_00087_mRNA_7.1     |
| GF0045105 | 0                            | 0                         | 1                            | Hypothetical protein (1)                                    |                                                                                                                                                                                                                                                                                                                                                                                   |                                                                                                                                                                                                                                                                                                                                                           | -                               | -                            | P_trifoliata_00087_mRNA_69.1    |
| GF0045104 | 0                            | 0                         | 1                            | Hypothetical protein (1)                                    |                                                                                                                                                                                                                                                                                                                                                                                   |                                                                                                                                                                                                                                                                                                                                                           | -                               | -                            | P_trifoliata_00087_mRNA_67.1    |
| GF0045103 | 0                            | 0                         | 1                            | Hypothetical protein (1)                                    |                                                                                                                                                                                                                                                                                                                                                                                   |                                                                                                                                                                                                                                                                                                                                                           | -                               | -                            | P_trifoliata_00087_mRNA_59.1    |
| GF0045102 | 0                            | 0                         | 1                            | Hypothetical protein (1)                                    | nucleic acid binding [GO:0003676 molecular_function] (1)                                                                                                                                                                                                                                                                                                                          | Ribonuclease H-like domain [IPR012337] (1)                                                                                                                                                                                                                                                                                                                | -                               | -                            | P_trifoliata_00087_mRNA_57.1    |
| GF0045101 | 0                            | 0                         | 1                            | Hypothetical protein (1)                                    | nucleic acid binding [GO:0003676 molecular_function] (1); protein dimerization activity [GO:0046083 molecular_function] (1)                                                                                                                                                                                                                                                       | Ribonuclease H-like domain [IPR012337] (1); HAT, C-terminal dimerization domain [IPR008906] (1)                                                                                                                                                                                                                                                           | -                               | -                            | P_trifoliata_00087_mRNA_55.1    |
| GF0045100 | 0                            | 0                         | 1                            | Hypothetical protein (1)                                    |                                                                                                                                                                                                                                                                                                                                                                                   |                                                                                                                                                                                                                                                                                                                                                           | -                               | -                            | P_trifoliata_00087_mRNA_53.1    |
| GF0045099 | 0                            | 0                         | 1                            | Hypothetical protein (1)                                    |                                                                                                                                                                                                                                                                                                                                                                                   |                                                                                                                                                                                                                                                                                                                                                           | -                               | -                            | P_trifoliata_00087_mRNA_42.1    |
| GF0045098 | 0                            | 0                         | 1                            | Hypothetical protein (1)                                    |                                                                                                                                                                                                                                                                                                                                                                                   |                                                                                                                                                                                                                                                                                                                                                           | -                               | -                            | P_trifoliata_00087_mRNA_39.1    |
| GF0045097 | 0                            | 0                         | 1                            | Hypothetical protein (1)                                    | protein kinase activity [GO:0004672 molecular_function] (1); protein phosphorylation [GO:0006468 biological_process] (1); ATP binding [GO:0005524 molecular_function] (1)                                                                                                                                                                                                         | Protein kinase, ATP binding site [IPR017441] (1); Protein kinase domain [IPR007019] (1); Protein kinase-like domain [IPR011009] (1)                                                                                                                                                                                                                       | -                               | -                            | P_trifoliata_00087_mRNA_38.1    |
| GF0045096 | 0                            | 0                         | 1                            | Hypothetical protein (1)                                    |                                                                                                                                                                                                                                                                                                                                                                                   |                                                                                                                                                                                                                                                                                                                                                           | -                               | -                            | P_trifoliata_00087_mRNA_35.1    |
| GF0045095 | 0                            | 0                         | 1                            | TMV resistance protein N (1)                                | protein binding [GO:0005515 molecular_function] (1); signal transduction [GO:0007165 biological_process] (1); ADP binding [GO:0043531 molecular_function] (1)                                                                                                                                                                                                                     | Reverse transcriptase, RNA-dependent DNA polymerase [IPR013103] (1); NB-ARC [IPR02182] (1); P-loop containing nucleoside triphosphate hydrolase [IPR027417] (1); Toll/interleukin-1 receptor homology (TR) domain [IPR001571] (1); LOG family [IPR013100] (1)                                                                                             | -                               | -                            | P_trifoliata_00087_mRNA_34.1    |
| GF0045094 | 0                            | 0                         | 1                            | Hypothetical protein (1)                                    |                                                                                                                                                                                                                                                                                                                                                                                   |                                                                                                                                                                                                                                                                                                                                                           | -                               | -                            | P_trifoliata_00087_mRNA_33.1    |
| GF0045093 | 0                            | 0                         | 1                            | Hypothetical protein (1)                                    |                                                                                                                                                                                                                                                                                                                                                                                   |                                                                                                                                                                                                                                                                                                                                                           | -                               | -                            | P_trifoliata_00087_mRNA_32.1    |
| GF0045092 | 0                            | 0                         | 1                            | Hypothetical protein (1)                                    |                                                                                                                                                                                                                                                                                                                                                                                   |                                                                                                                                                                                                                                                                                                                                                           | -                               | -                            | P_trifoliata_00087_mRNA_31.1    |
| GF0045091 | 0                            | 0                         | 1                            | Hypothetical protein (1)                                    |                                                                                                                                                                                                                                                                                                                                                                                   |                                                                                                                                                                                                                                                                                                                                                           | -                               | -                            | P_trifoliata_00087_mRNA_30.1    |
| GF0045090 | 0                            | 0                         | 1                            | Hypothetical protein (1)                                    | DNA binding [GO:0003677 molecular_function] (1)                                                                                                                                                                                                                                                                                                                                   | Zinc finger, BED-type [IPR036556] (1); Leucine-rich repeat domain, L domain-like [IPR032675] (1)                                                                                                                                                                                                                                                          | -                               | -                            | P_trifoliata_00087_mRNA_28.1    |
| GF0045089 | 0                            | 0                         | 1                            | Hypothetical protein (1)                                    | protein binding [GO:0005515 molecular_function] (1); histone-lysine N-methyltransferase activity [GO:0018024 molecular_function] (1); zinc ion binding [GO:0008270 molecular_function] (1); nucleus [GO:0005634 cellular_component] (1); histone lysine methylation [GO:0034968 biological_process] (1); histone binding [GO:0042393 molecular_function] (1)                      | Leucine-rich repeat [IPR001611] (1); Leucine-rich repeat-containing N-terminal, plant-type [IPR013210] (1); Leucine-rich repeat domain, L domain-like [IPR032675] (1); Pre-SET zinc-binding sub-group [IPR03606] (1); Pre-SET domain [IPR007728] (1); PUA-like domain [IPR015947] (1); SRA-YDG [IPR03105] (1)                                             | -                               | -                            | P_trifoliata_00087_mRNA_27.1    |
| GF0045088 | 0                            | 0                         | 1                            | Hypothetical protein (1)                                    |                                                                                                                                                                                                                                                                                                                                                                                   |                                                                                                                                                                                                                                                                                                                                                           | -                               | -                            | P_trifoliata_00087_mRNA_2.1     |
| GF0045087 | 0                            | 0                         | 1                            | Hypothetical protein (1)                                    |                                                                                                                                                                                                                                                                                                                                                                                   |                                                                                                                                                                                                                                                                                                                                                           | -                               | -                            | P_trifoliata_00087_mRNA_19.1    |
| GF0045086 | 0                            | 0                         | 1                            | Hypothetical protein (1)                                    |                                                                                                                                                                                                                                                                                                                                                                                   |                                                                                                                                                                                                                                                                                                                                                           | -                               | -                            | P_trifoliata_00087_mRNA_18.1    |
| GF0045085 | 0                            | 0                         | 1                            | Hypothetical protein (1)                                    | enzyme inhibitor activity [GO:0004857 molecular_function] (1)                                                                                                                                                                                                                                                                                                                     | Pectinesterase inhibitor domain [IPR006501] (1)                                                                                                                                                                                                                                                                                                           | -                               | -                            | P_trifoliata_00087_mRNA_15.1    |
| GF0045084 | 0                            | 0                         | 1                            | Hypothetical protein (1)                                    |                                                                                                                                                                                                                                                                                                                                                                                   |                                                                                                                                                                                                                                                                                                                                                           | -                               | -                            | P_trifoliata_00087_mRNA_11.1    |
| GF0045083 | 0                            | 0                         | 1                            | Hypothetical protein (1)                                    | N-acetyltransferase activity [GO:0008080 molecular_function] (1); protein binding [GO:0005515 molecular_function] (1)                                                                                                                                                                                                                                                             | Leucine-rich repeat [IPR001611] (1); GNAT domain [IPR000182] (1); Acyl-CoA N-acyltransferase [IPR016181] (1); Leucine-rich repeat domain, L domain-like [IPR032675] (1)                                                                                                                                                                                   | -                               | -                            | P_trifoliata_00087_mRNA_1.1     |
| GF0045082 | 0                            | 0                         | 1                            | Hypothetical protein (1)                                    |                                                                                                                                                                                                                                                                                                                                                                                   |                                                                                                                                                                                                                                                                                                                                                           | -                               | -                            | P_trifoliata_00086_mRNA_9.1     |
| GF0045081 | 0                            | 0                         | 1                            | Hypothetical protein (1)                                    | hydroquinone oxygen oxidoreductase activity [GO:0052716 molecular_function] (1); oxidation-reduction process [GO:0055114 biological_process] (1); oxidoreductase activity [GO:0016490 molecular_function] (1); copper ion binding [GO:0005507 molecular_function] (1); apoplast [GO:0048046 cellular_component] (1); lignin catabolic process [GO:0046274 biological_process] (1) | Multicopper oxidase, type 2 [IPR011706] (1); Laccase [IPR017761] (1); Multicopper oxidase, type 1 [IPR001117] (1); Cupredoxin [IPR0008972] (1); Multicopper oxidase, type 3 [IPR011707] (1)                                                                                                                                                               | -                               | -                            | P_trifoliata_00086_mRNA_78.1    |
| GF0045080 | 0                            | 0                         | 1                            | Hypothetical protein (1)                                    | DNA binding [GO:0003677 molecular_function] (1)                                                                                                                                                                                                                                                                                                                                   | hAT-like transposase, RNase-H fold [IPR025525] (1)                                                                                                                                                                                                                                                                                                        | -                               | -                            | P_trifoliata_00086_mRNA_63.1    |
| GF0045079 | 0                            | 0                         | 1                            | Hypothetical protein (1)                                    |                                                                                                                                                                                                                                                                                                                                                                                   |                                                                                                                                                                                                                                                                                                                                                           | -                               | -                            | P_trifoliata_00086_mRNA_62.1    |
| GF0045078 | 0                            | 0                         | 1                            | Hypothetical protein (1)                                    |                                                                                                                                                                                                                                                                                                                                                                                   |                                                                                                                                                                                                                                                                                                                                                           | -                               | -                            | P_trifoliata_00086_mRNA_52.1    |
| GF0045077 | 0                            | 0                         | 1                            | Hypothetical protein (1)                                    |                                                                                                                                                                                                                                                                                                                                                                                   |                                                                                                                                                                                                                                                                                                                                                           | -                               | -                            | P_trifoliata_00086_mRNA_50.1    |
| GF0045076 | 0                            | 0                         | 1                            | Hypothetical protein (1)                                    |                                                                                                                                                                                                                                                                                                                                                                                   |                                                                                                                                                                                                                                                                                                                                                           | -                               | -                            | P_trifoliata_00086_mRNA_49.1    |
| GF0045075 | 0                            | 0                         | 1                            | Hypothetical protein (1)                                    |                                                                                                                                                                                                                                                                                                                                                                                   |                                                                                                                                                                                                                                                                                                                                                           | -                               | -                            | P_trifoliata_00086_mRNA_48.1    |
| GF0045074 | 0                            | 0                         | 1                            | Hypothetical protein (1)                                    |                                                                                                                                                                                                                                                                                                                                                                                   |                                                                                                                                                                                                                                                                                                                                                           | -                               | -                            | P_trifoliata_00086_mRNA_46.1    |
| GF0045073 | 0                            | 0                         | 1                            | Hypothetical protein (1)                                    |                                                                                                                                                                                                                                                                                                                                                                                   |                                                                                                                                                                                                                                                                                                                                                           | -                               | -                            | P_trifoliata_00086_mRNA_40.1    |
| GF0045072 | 0                            | 0                         | 1                            | Hypothetical protein (1)                                    |                                                                                                                                                                                                                                                                                                                                                                                   |                                                                                                                                                                                                                                                                                                                                                           | -                               | -                            | P_trifoliata_00086_mRNA_37.1    |
| GF0045071 | 0                            | 0                         | 1                            | Hypothetical protein (1)                                    |                                                                                                                                                                                                                                                                                                                                                                                   |                                                                                                                                                                                                                                                                                                                                                           | -                               | -                            | P_trifoliata_00086_mRNA_36.1    |
| GF0045070 | 0                            | 0                         | 1                            | Putative carboxylesterase 11 (1)                            | hydrolase activity [GO:0016787 molecular_function] (1); metabolic process [GO:0008152 biological_process] (1)                                                                                                                                                                                                                                                                     | Alpha/beta hydrolase fold-3 [IPR013094] (1); Alpha/Beta hydrolase fold [IPR029058] (1)                                                                                                                                                                                                                                                                    | -                               | -                            | P_trifoliata_00086_mRNA_30.1    |
| GF0045069 | 0                            | 0                         | 1                            | TSA: Wollastonia nobilis transcribed RNA sequence (1)       | ATPase activity [GO:0016887 molecular_function] (1); ATP binding [GO:0005524 molecular_function] (1)                                                                                                                                                                                                                                                                              | ABC transporter-like [IPR003439] (1); AAA+ ATPase domain [IPR03593] (1); P-loop containing nucleoside triphosphate hydrolase [IPR027417] (1)                                                                                                                                                                                                              | -                               | -                            | P_trifoliata_00086_mRNA_17.1    |
| GF0045068 | 0                            | 0                         | 1                            | Glycerinaldehyde-3-phosphate dehydrogenase C2 isoform 3 (1) | oxidation-reduction process [GO:0055114 biological_process] (1); oxidoreductase activity, acting on the aldehyde or oxo group of donors, NAD or NADP as acceptor [GO:0016620 molecular_function] (1)                                                                                                                                                                              | Glycerinaldehyde Erythrose phosphate dehydrogenase family [IPR020831] (1); Glycerinaldehyde 3-phosphate dehydrogenase, active site [IPR020830] (1); NAD(P)-binding domain [IPR01640] (1); Glycerinaldehyde 3-phosphate dehydrogenase, NAD(P) binding domain [IPR020828] (1); Glycerinaldehyde 3-phosphate dehydrogenase, catalytic domain [IPR020829] (1) | -                               | -                            | P_trifoliata_00086_mRNA_15.1    |
| GF0045067 | 0                            | 0                         | 1                            | Hypothetical protein (1)                                    |                                                                                                                                                                                                                                                                                                                                                                                   |                                                                                                                                                                                                                                                                                                                                                           | -                               | -                            | P_trifoliata_00085_mRNA_97.1    |
| GF0045066 | 0                            | 0                         | 1                            | Hypothetical protein (1)                                    |                                                                                                                                                                                                                                                                                                                                                                                   |                                                                                                                                                                                                                                                                                                                                                           | -                               | -                            | P_trifoliata_00085_mRNA_96.1    |
| GF0045065 | 0                            | 0                         | 1                            | Hypothetical protein (1)                                    | protein binding [GO:0005515 molecular_function] (1)                                                                                                                                                                                                                                                                                                                               | Askyrin repeat-containing domain [IPR020683] (1); Askyrin repeat [IPR002110] (1)                                                                                                                                                                                                                                                                          | -                               | -                            | P_trifoliata_00085_mRNA_92.1    |
| GF0045064 | 0                            | 0                         | 1                            | Hypothetical protein (1)                                    |                                                                                                                                                                                                                                                                                                                                                                                   |                                                                                                                                                                                                                                                                                                                                                           | -                               | -                            | P_trifoliata_00085_mRNA_9.1     |
| GF0045063 | 0                            | 0                         | 1                            | Hypothetical protein (1)                                    |                                                                                                                                                                                                                                                                                                                                                                                   |                                                                                                                                                                                                                                                                                                                                                           | -                               | -                            | P_trifoliata_00085_mRNA_8.1     |
| GF0045062 | 0                            | 0                         | 1                            | Hypothetical protein (1)                                    |                                                                                                                                                                                                                                                                                                                                                                                   |                                                                                                                                                                                                                                                                                                                                                           | -                               | -                            | P_trifoliata_00085_mRNA_79.1    |
| GF0045061 | 0                            | 0                         | 1                            | Hypothetical protein (1)                                    | catalytic activity [GO:0003824 molecular_function] (1); protein phosphorylation [GO:0006470 biological_process] (1); protein serine/threonine phosphorylation [GO:0004722 molecular_function] (1)                                                                                                                                                                                 | PPM-type phosphatase domain [IPR001932] (1); Protein phosphatase 2C family [IPR015655] (1)                                                                                                                                                                                                                                                                | -                               | -                            | P_trifoliata_00085_mRNA_78.1    |
| GF0045060 | 0                            | 0                         | 1                            | Hypothetical protein (1)                                    |                                                                                                                                                                                                                                                                                                                                                                                   |                                                                                                                                                                                                                                                                                                                                                           | -                               | -                            | P_trifoliata_00085_mRNA_74.1    |
| GF0045059 | 0                            | 0                         | 1                            | Hypothetical protein (1)                                    |                                                                                                                                                                                                                                                                                                                                                                                   |                                                                                                                                                                                                                                                                                                                                                           | -                               | -                            | P_trifoliata_00085_mRNA_7.1     |
| GF0045058 | 0                            | 0                         | 1                            | Hypothetical protein (1)                                    |                                                                                                                                                                                                                                                                                                                                                                                   |                                                                                                                                                                                                                                                                                                                                                           | -                               | -                            | P_trifoliata_00085_mRNA_69.1    |
| GF0045057 | 0                            | 0                         | 1                            | Hypothetical protein (1)                                    |                                                                                                                                                                                                                                                                                                                                                                                   |                                                                                                                                                                                                                                                                                                                                                           | -                               | -                            | P_trifoliata_00085_mRNA_62.1    |
| GF0045056 | 0                            | 0                         | 1                            | Hypothetical protein (1)                                    |                                                                                                                                                                                                                                                                                                                                                                                   |                                                                                                                                                                                                                                                                                                                                                           | -                               | -                            | P_trifoliata_00085_mRNA_6.1     |
| GF0045055 | 0                            | 0                         | 1                            | Hypothetical protein (1)                                    |                                                                                                                                                                                                                                                                                                                                                                                   |                                                                                                                                                                                                                                                                                                                                                           | -                               | -                            | P_trifoliata_00085_mRNA_5.1     |
| GF0045054 | 0                            | 0                         | 1                            | Hypothetical protein (1)                                    |                                                                                                                                                                                                                                                                                                                                                                                   |                                                                                                                                                                                                                                                                                                                                                           | -                               | -                            | P_trifoliata_00085_mRNA_50.1    |
| GF0045053 | 0                            | 0                         | 1                            | Hypothetical protein (1)                                    |                                                                                                                                                                                                                                                                                                                                                                                   |                                                                                                                                                                                                                                                                                                                                                           | -                               | -                            | P_trifoliata_00085_mRNA_5.1     |
| GF0045052 | 0                            | 0                         | 1                            | Heavy metal ATPase transporter (1)                          | integral component of membrane [GO:0016021 cellular_component] (1); metal ion binding [GO:0046872 molecular_function] (1); cation transport [GO:0006812 biological_process] (1); nucleoside binding [GO:0000166 molecular_function] (1); cation-transporting ATPase activity [GO:0019829 molecular_function] (1)                                                                  | P-type ATPase, cytoplasmic domain N [IPR023901] (1); P-type ATPase [IPR001757] (1); P-type ATPase, subfamily IB [IPR027256] (1); P-type ATPase, phosphorylation site [IPR018303] (1); HAD-like domain [IPR023214] (1); P-type ATPase, A domain [IPR008250] (1)                                                                                            | -                               | -                            | P_trifoliata_00085_mRNA_43.1    |
| GF0045051 | 0                            | 0                         | 1                            | Hypothetical protein (1)                                    |                                                                                                                                                                                                                                                                                                                                                                                   |                                                                                                                                                                                                                                                                                                                                                           | -                               | -                            | P_trifoliata_00085_mRNA_42.1    |
| GF0045050 | 0                            | 0                         | 1                            | Hypothetical protein (1)                                    |                                                                                                                                                                                                                                                                                                                                                                                   |                                                                                                                                                                                                                                                                                                                                                           | -                               | -                            | P_trifoliata_00085_mRNA_42.1    |

| ID        | Num. in <i>C. clementiae</i> | Num. in <i>C. canthii</i> | Num. in <i>P. trifoliata</i> | Note                                                             | GO                                                                                                                                                                                                                                                                                                                 | InterPro                                                                                                                                                                                                                                                | Members in <i>C. clementiae</i> | Members in <i>C. canthii</i> | Members in <i>P. trifoliata</i> |
|-----------|------------------------------|---------------------------|------------------------------|------------------------------------------------------------------|--------------------------------------------------------------------------------------------------------------------------------------------------------------------------------------------------------------------------------------------------------------------------------------------------------------------|---------------------------------------------------------------------------------------------------------------------------------------------------------------------------------------------------------------------------------------------------------|---------------------------------|------------------------------|---------------------------------|
| GF0045049 | 0                            | 0                         | 1                            | Hypothetical protein (1)                                         |                                                                                                                                                                                                                                                                                                                    |                                                                                                                                                                                                                                                         |                                 |                              | P_trifoliata_00085_mRNA_41.1    |
| GF0045048 | 0                            | 0                         | 1                            | Hypothetical protein (1)                                         |                                                                                                                                                                                                                                                                                                                    |                                                                                                                                                                                                                                                         |                                 |                              | P_trifoliata_00085_mRNA_40.1    |
| GF0045047 | 0                            | 0                         | 1                            | Hypothetical protein (1)                                         |                                                                                                                                                                                                                                                                                                                    |                                                                                                                                                                                                                                                         |                                 |                              | P_trifoliata_00085_mRNA_39.1    |
| GF0045046 | 0                            | 0                         | 1                            | Hypothetical protein (1)                                         |                                                                                                                                                                                                                                                                                                                    |                                                                                                                                                                                                                                                         |                                 |                              | P_trifoliata_00085_mRNA_38.1    |
| GF0045045 | 0                            | 0                         | 1                            | Monosaccharide transport protein (1)                             |                                                                                                                                                                                                                                                                                                                    |                                                                                                                                                                                                                                                         |                                 |                              | P_trifoliata_00085_mRNA_37.1    |
| GF0045044 | 0                            | 0                         | 1                            | Hypothetical protein (1)                                         |                                                                                                                                                                                                                                                                                                                    |                                                                                                                                                                                                                                                         |                                 |                              | P_trifoliata_00085_mRNA_32.1    |
| GF0045043 | 0                            | 0                         | 1                            | Hypothetical protein (1)                                         |                                                                                                                                                                                                                                                                                                                    |                                                                                                                                                                                                                                                         |                                 |                              | P_trifoliata_00085_mRNA_31.1    |
| GF0045042 | 0                            | 0                         | 1                            | Hypothetical protein (1)                                         |                                                                                                                                                                                                                                                                                                                    |                                                                                                                                                                                                                                                         |                                 |                              | P_trifoliata_00085_mRNA_29.1    |
| GF0045041 | 0                            | 0                         | 1                            | Hypothetical protein (1)                                         |                                                                                                                                                                                                                                                                                                                    |                                                                                                                                                                                                                                                         |                                 |                              | P_trifoliata_00085_mRNA_28.1    |
| GF0045040 | 0                            | 0                         | 1                            | Hypothetical protein (1)                                         |                                                                                                                                                                                                                                                                                                                    |                                                                                                                                                                                                                                                         |                                 |                              | P_trifoliata_00085_mRNA_20.1    |
| GF0045039 | 0                            | 0                         | 1                            | Hypothetical protein (1)                                         |                                                                                                                                                                                                                                                                                                                    |                                                                                                                                                                                                                                                         |                                 |                              | P_trifoliata_00085_mRNA_18.1    |
| GF0045038 | 0                            | 0                         | 1                            | Hypothetical protein (1)                                         | proteolysis [GO:0006508 biological_process] (1); aspartic-type endopeptidase activity [GO:0004190 molecular_function] (1)                                                                                                                                                                                          | Peptidase A2A, retrovirus, catalytic [IPRO01995] (1)                                                                                                                                                                                                    |                                 |                              | P_trifoliata_00085_mRNA_17.1    |
| GF0045037 | 0                            | 0                         | 1                            | Hypothetical protein (1)                                         |                                                                                                                                                                                                                                                                                                                    |                                                                                                                                                                                                                                                         |                                 |                              | P_trifoliata_00085_mRNA_15.1    |
| GF0045036 | 0                            | 0                         | 1                            | Hypothetical protein (1)                                         |                                                                                                                                                                                                                                                                                                                    |                                                                                                                                                                                                                                                         |                                 |                              | P_trifoliata_00085_mRNA_14.1    |
| GF0045035 | 0                            | 0                         | 1                            | Hypothetical protein (1)                                         |                                                                                                                                                                                                                                                                                                                    |                                                                                                                                                                                                                                                         |                                 |                              | P_trifoliata_00085_mRNA_13.1    |
| GF0045034 | 0                            | 0                         | 1                            | Hypothetical protein (1)                                         |                                                                                                                                                                                                                                                                                                                    |                                                                                                                                                                                                                                                         |                                 |                              | P_trifoliata_00085_mRNA_102.1   |
| GF0045033 | 0                            | 0                         | 1                            | Hypothetical protein (1)                                         |                                                                                                                                                                                                                                                                                                                    |                                                                                                                                                                                                                                                         |                                 |                              | P_trifoliata_00085_mRNA_101.1   |
| GF0045032 | 0                            | 0                         | 1                            | Hypothetical protein (1)                                         |                                                                                                                                                                                                                                                                                                                    |                                                                                                                                                                                                                                                         |                                 |                              | P_trifoliata_00085_mRNA_100.1   |
| GF0045031 | 0                            | 0                         | 1                            | Hypothetical protein (1)                                         |                                                                                                                                                                                                                                                                                                                    |                                                                                                                                                                                                                                                         |                                 |                              | P_trifoliata_00085_mRNA_10.1    |
| GF0045030 | 0                            | 0                         | 1                            | Hypothetical protein (1)                                         |                                                                                                                                                                                                                                                                                                                    |                                                                                                                                                                                                                                                         |                                 |                              | P_trifoliata_00085_mRNA_1.1     |
| GF0045029 | 0                            | 0                         | 1                            | Hypothetical protein (1)                                         | protein binding [GO:0005515 molecular_function] (1)                                                                                                                                                                                                                                                                | Post-SET domain [IPRO03616] (1); SET domain [IPRO01214] (1)                                                                                                                                                                                             |                                 |                              | P_trifoliata_00084_mRNA_9.1     |
| GF0045028 | 0                            | 0                         | 1                            | Hypothetical protein (1)                                         |                                                                                                                                                                                                                                                                                                                    | Sieve element occlusion, N-terminal [IPRO27942] (1)                                                                                                                                                                                                     |                                 |                              | P_trifoliata_00084_mRNA_83.1    |
| GF0045027 | 0                            | 0                         | 1                            | Hypothetical protein (1)                                         |                                                                                                                                                                                                                                                                                                                    | MULE transposase domain [IPRO18289] (1)                                                                                                                                                                                                                 |                                 |                              | P_trifoliata_00084_mRNA_70.1    |
| GF0045026 | 0                            | 0                         | 1                            | Hypothetical protein (1)                                         |                                                                                                                                                                                                                                                                                                                    |                                                                                                                                                                                                                                                         |                                 |                              | P_trifoliata_00084_mRNA_7.1     |
| GF0045025 | 0                            | 0                         | 1                            | Hypothetical protein (1)                                         |                                                                                                                                                                                                                                                                                                                    |                                                                                                                                                                                                                                                         |                                 |                              | P_trifoliata_00084_mRNA_68.1    |
| GF0045024 | 0                            | 0                         | 1                            | Hypothetical protein (1)                                         |                                                                                                                                                                                                                                                                                                                    |                                                                                                                                                                                                                                                         |                                 |                              | P_trifoliata_00084_mRNA_64.1    |
| GF0045023 | 0                            | 0                         | 1                            | Hypothetical protein (1)                                         |                                                                                                                                                                                                                                                                                                                    |                                                                                                                                                                                                                                                         |                                 |                              | P_trifoliata_00084_mRNA_61.1    |
| GF0045022 | 0                            | 0                         | 1                            | Hypothetical protein (1)                                         |                                                                                                                                                                                                                                                                                                                    |                                                                                                                                                                                                                                                         |                                 |                              | P_trifoliata_00084_mRNA_60.1    |
| GF0045021 | 0                            | 0                         | 1                            | Hypothetical protein (1)                                         |                                                                                                                                                                                                                                                                                                                    | Eukaryotic translation initiation factor 3 subunit G, N-terminal [IPRO24675] (1)                                                                                                                                                                        |                                 |                              | P_trifoliata_00084_mRNA_6.1     |
| GF0045020 | 0                            | 0                         | 1                            | Hypothetical protein (1)                                         |                                                                                                                                                                                                                                                                                                                    | TB2/DP1/HVA22-related protein [IPRO04345] (1); Leucine-rich repeat domain, L domain-like [IPRO32675] (1)                                                                                                                                                |                                 |                              | P_trifoliata_00084_mRNA_59.1    |
| GF0045019 | 0                            | 0                         | 1                            | 5'-methylthioadenosine/S-adenosylhomocysteine nucleosidase 1 (1) | nucleoside metabolic process [GO:0009116 biological_process] (1); adenosylhomocysteine nucleosidase 1 (1)                                                                                                                                                                                                          | Nucleoside phosphorylase domain [IPRO08045] (1); Nucleoside phosphorylase [IPRO18017] (1)                                                                                                                                                               |                                 |                              | P_trifoliata_00084_mRNA_52.1    |
| GF0045018 | 0                            | 0                         | 1                            | Hypothetical protein (1)                                         |                                                                                                                                                                                                                                                                                                                    |                                                                                                                                                                                                                                                         |                                 |                              | P_trifoliata_00084_mRNA_47.1    |
| GF0045017 | 0                            | 0                         | 1                            | Hypothetical protein (1)                                         |                                                                                                                                                                                                                                                                                                                    | Nuclear 27S pre-rRNA processing, Urib2-Npa2, C-terminal [IPRO18849] (1)                                                                                                                                                                                 |                                 |                              | P_trifoliata_00084_mRNA_45.1    |
| GF0045016 | 0                            | 0                         | 1                            | Hypothetical protein (1)                                         |                                                                                                                                                                                                                                                                                                                    |                                                                                                                                                                                                                                                         |                                 |                              | P_trifoliata_00084_mRNA_44.1    |
| GF0045015 | 0                            | 0                         | 1                            | Hypothetical protein (1)                                         |                                                                                                                                                                                                                                                                                                                    |                                                                                                                                                                                                                                                         |                                 |                              | P_trifoliata_00084_mRNA_42.1    |
| GF0045014 | 0                            | 0                         | 1                            | Hypothetical protein (1)                                         | protein dimerization activity [GO:0046983 molecular_function] (1); nucleic acid binding [GO:0000376 molecular_function] (1); metabolic process [GO:0008152 biological_process] (1); catalytic activity [GO:0003524 molecular_function] (1)                                                                         | Ribonuclease H-like domain [IPRO02942] (1); AMP-dependent synthetase/ligase [IPRO08073] (1); HAT, C-terminal dimerisation domain [IPRO08906] (1)                                                                                                        |                                 |                              | P_trifoliata_00084_mRNA_4.1     |
| GF0045013 | 0                            | 0                         | 1                            | Hypothetical protein (1)                                         |                                                                                                                                                                                                                                                                                                                    |                                                                                                                                                                                                                                                         |                                 |                              | P_trifoliata_00084_mRNA_39.1    |
| GF0045012 | 0                            | 0                         | 1                            | Hypothetical protein (1)                                         |                                                                                                                                                                                                                                                                                                                    | Gag-polypeptide of LTR copia-type [IPRO29472] (1)                                                                                                                                                                                                       |                                 |                              | P_trifoliata_00084_mRNA_26.1    |
| GF0045011 | 0                            | 0                         | 1                            | Hypothetical protein (1)                                         |                                                                                                                                                                                                                                                                                                                    | Artباط homology (AH) domain/BAR domain [IPRO27873] (1)                                                                                                                                                                                                  |                                 |                              | P_trifoliata_00084_mRNA_24.1    |
| GF0045010 | 0                            | 0                         | 1                            | Hypothetical protein (1)                                         | cysteine-type peptidase activity [GO:0008234 molecular_function] (1); proteolysis [GO:0006508 biological_process] (1)                                                                                                                                                                                              | Ulp1 protease family, C-terminal catalytic domain [IPRO03653] (1)                                                                                                                                                                                       |                                 |                              | P_trifoliata_00084_mRNA_21.1    |
| GF0045009 | 0                            | 0                         | 1                            | Phosphoprotein phosphatase (1)                                   |                                                                                                                                                                                                                                                                                                                    | Leucine-rich repeat domain, L domain-like [IPRO32675] (1)                                                                                                                                                                                               |                                 |                              | P_trifoliata_00084_mRNA_18.1    |
| GF0045008 | 0                            | 0                         | 1                            | Hypothetical protein (1)                                         |                                                                                                                                                                                                                                                                                                                    | Leucine-rich repeat domain, L domain-like [IPRO32675] (1)                                                                                                                                                                                               |                                 |                              | P_trifoliata_00084_mRNA_17.1    |
| GF0045007 | 0                            | 0                         | 1                            | Disease resistance protein RPS2, putative (1)                    | Disease resistance protein RPS2, putative [GO:0043531 molecular_function] (1)                                                                                                                                                                                                                                      | NB-ARC [IPRO02182] (1); P-loop containing nucleoside triphosphate hydrolase [IPRO27417] (1)                                                                                                                                                             |                                 |                              | P_trifoliata_00084_mRNA_16.1    |
| GF0045006 | 0                            | 0                         | 1                            | NBS-LRR type disease resistance protein (1)                      | NBS-LRR type disease resistance protein [GO:0043531 molecular_function] (1)                                                                                                                                                                                                                                        | P-loop containing nucleoside triphosphate hydrolase [IPRO27417] (1); NB-ARC [IPRO02182] (1)                                                                                                                                                             |                                 |                              | P_trifoliata_00084_mRNA_15.1    |
| GF0045005 | 0                            | 0                         | 1                            | Expansin-like B1 (1)                                             | sexual reproduction [GO:0019953 biological_process] (1); extracellular region [GO:0005576 cellular_component] (1)                                                                                                                                                                                                  | Expansin/LoI pI [IPRO07118] (1); Expansin, cellulose-binding-like domain [IPRO07117] (1); RipA-like double-psi beta-barrel domain [IPRO09091] (1); Expansin/pollen allergen, DPBB domain [IPRO07112] (1); Major pollen allergen LoI pI [IPRO05795] (1)  |                                 |                              | P_trifoliata_00084_mRNA_13.1    |
| GF0045004 | 0                            | 0                         | 1                            | Hypothetical protein (1)                                         |                                                                                                                                                                                                                                                                                                                    |                                                                                                                                                                                                                                                         |                                 |                              | P_trifoliata_00084_mRNA_12.1    |
| GF0045003 | 0                            | 0                         | 1                            | Hypothetical protein (1)                                         |                                                                                                                                                                                                                                                                                                                    |                                                                                                                                                                                                                                                         |                                 |                              | P_trifoliata_00084_mRNA_11.1    |
| GF0045002 | 0                            | 0                         | 1                            | Hypothetical protein (1)                                         | nucleus [GO:0005634 cellular_component] (1); histone lysine methylation [GO:0034968 biological_process] (1); histone binding [GO:0042393 molecular_function] (1); histone-lysine N-methyltransferase activity [GO:0018024 molecular_function] (1); zinc ion binding [GO:0008270 molecular_function] (1)            | Pre-SET zinc-binding sub-group [IPRO03600] (1); Pre-SET domain [IPRO07728] (1); PU-A-like domain [IPRO15947] (1); SRA-YDG [IPRO03105] (1)                                                                                                               |                                 |                              | P_trifoliata_00084_mRNA_10.1    |
| GF0045001 | 0                            | 0                         | 1                            | Protein AG1 (1)                                                  | GTP binding [GO:0005525 molecular_function] (1)                                                                                                                                                                                                                                                                    | P-loop containing nucleoside triphosphate hydrolase [IPRO27417] (1); AG1-type guanine nucleotide-binding (G) domain [IPRO06703] (1)                                                                                                                     |                                 |                              | P_trifoliata_00083_mRNA_9.1     |
| GF0045000 | 0                            | 0                         | 1                            | Hypothetical protein (1)                                         |                                                                                                                                                                                                                                                                                                                    | Domain of unknown function DUF4371 [IPRO25398] (1)                                                                                                                                                                                                      |                                 |                              | P_trifoliata_00083_mRNA_80.1    |
| GF0044999 | 0                            | 0                         | 1                            | Hypothetical protein (1)                                         |                                                                                                                                                                                                                                                                                                                    |                                                                                                                                                                                                                                                         |                                 |                              | P_trifoliata_00083_mRNA_8.1     |
| GF0044998 | 0                            | 0                         | 1                            | Hypothetical protein (1)                                         |                                                                                                                                                                                                                                                                                                                    |                                                                                                                                                                                                                                                         |                                 |                              | P_trifoliata_00083_mRNA_74.1    |
| GF0044997 | 0                            | 0                         | 1                            | Hypothetical protein (1)                                         |                                                                                                                                                                                                                                                                                                                    |                                                                                                                                                                                                                                                         |                                 |                              | P_trifoliata_00083_mRNA_61.1    |
| GF0044996 | 0                            | 0                         | 1                            | Hypothetical protein (1)                                         | helicase activity [GO:0004386 molecular_function] (1)                                                                                                                                                                                                                                                              | Helicase-associated domain [IPRO07502] (1); P-loop containing nucleoside triphosphate hydrolase [IPRO27417] (1)                                                                                                                                         |                                 |                              | P_trifoliata_00083_mRNA_51.1    |
| GF0044995 | 0                            | 0                         | 1                            | Pre-mRNA-splicing factor ATP-dependent RNA helicase (1)          | ATP binding [GO:0005524 molecular_function] (1); nucleic acid binding [GO:0003676 molecular_function] (1); ATP-dependent helicase activity [GO:0008026 molecular_function] (1)                                                                                                                                     | Helicase, C-terminal [IPRO01650] (1); P-loop containing nucleoside triphosphate hydrolase [IPRO27417] (1); Helicase superfamily 1/2, ATP-binding domain [IPRO14001] (1); DNA/RNA helicase, ATP-dependent, DEAH-box type, conserved site [IPRO02464] (1) |                                 |                              | P_trifoliata_00083_mRNA_50.1    |
| GF0044994 | 0                            | 0                         | 1                            | Hypothetical protein (1)                                         |                                                                                                                                                                                                                                                                                                                    |                                                                                                                                                                                                                                                         |                                 |                              | P_trifoliata_00083_mRNA_5.1     |
| GF0044993 | 0                            | 0                         | 1                            | Hypothetical protein (1)                                         |                                                                                                                                                                                                                                                                                                                    |                                                                                                                                                                                                                                                         |                                 |                              | P_trifoliata_00083_mRNA_42.1    |
| GF0044992 | 0                            | 0                         | 1                            | Flavonoid 3'-monooxygenase (1)                                   | iron ion binding [GO:0005506 molecular_function] (1); heme binding [GO:0020037 molecular_function] (1); oxidoreductase activity, acting on paired donors, with incorporation or reduction of molecular oxygen [GO:0016705 molecular_function] (1); oxidation-reduction process [GO:0055114 biological_process] (1) | Cytochrome P450 [IPRO01128] (1); Cytochrome P450, E-class, group 1 [IPRO02401] (1)                                                                                                                                                                      |                                 |                              | P_trifoliata_00083_mRNA_41.1    |
| GF0044991 | 0                            | 0                         | 1                            | Hypothetical protein (1)                                         |                                                                                                                                                                                                                                                                                                                    |                                                                                                                                                                                                                                                         |                                 |                              | P_trifoliata_00083_mRNA_39.1    |
| GF0044990 | 0                            | 0                         | 1                            | Hypothetical protein (1)                                         |                                                                                                                                                                                                                                                                                                                    | Domain of unknown function DUF4283 [IPRO25558] (1)                                                                                                                                                                                                      |                                 |                              | P_trifoliata_00083_mRNA_32.1    |
| GF0044989 | 0                            | 0                         | 1                            | Hypothetical protein (1)                                         |                                                                                                                                                                                                                                                                                                                    | MULE transposase domain [IPRO18289] (1)                                                                                                                                                                                                                 |                                 |                              | P_trifoliata_00083_mRNA_27.1    |
| GF0044988 | 0                            | 0                         | 1                            | Hypothetical protein (1)                                         | proteolysis [GO:0006508 biological_process] (1); cysteine-type peptidase activity [GO:0008234 molecular_function] (1)                                                                                                                                                                                              | Ulp1 protease family, C-terminal catalytic domain [IPRO03653] (1)                                                                                                                                                                                       |                                 |                              | P_trifoliata_00083_mRNA_25.1    |
| GF0044987 | 0                            | 0                         | 1                            | Hypothetical protein (1)                                         | response to stress [GO:0006950 biological_process] (1)                                                                                                                                                                                                                                                             | Late embryogenesis abundant protein, LEA5-type [IPRO04926] (1)                                                                                                                                                                                          |                                 |                              | P_trifoliata_00083_mRNA_21.1    |
| GF0044986 | 0                            | 0                         | 1                            | Hypothetical protein (1)                                         |                                                                                                                                                                                                                                                                                                                    | TB2/DP1/HVA22-related protein [IPRO04345] (1)                                                                                                                                                                                                           |                                 |                              | P_trifoliata_00083_mRNA_17.1    |
| GF0044985 | 0                            | 0                         | 1                            | Hypothetical protein (1)                                         |                                                                                                                                                                                                                                                                                                                    |                                                                                                                                                                                                                                                         |                                 |                              | P_trifoliata_00083_mRNA_14.1    |
| GF0044984 | 0                            | 0                         | 1                            | Cytokinin riboside 5'-monophosphate phosphoribohydrolase (1)     |                                                                                                                                                                                                                                                                                                                    | LOG family [IPRO31100] (1)                                                                                                                                                                                                                              |                                 |                              | P_trifoliata_00083_mRNA_10.1    |
| GF0044983 | 0                            | 0                         | 1                            | Agmatase-like MADS-box protein AGL11 (1)                         | regulation of transcription, DNA-templated [GO:0006355 biological_process] (1); transcription factor activity, sequence-specific DNA binding [GO:0003700 molecular_function] (1); nucleus [GO:0005634 cellular_component] (1)                                                                                      | Transcription factor, K-box [IPRO02487] (1)                                                                                                                                                                                                             |                                 |                              | P_trifoliata_00083_mRNA_1.1     |
| GF0044982 | 0                            | 0                         | 1                            | Hypothetical protein (1)                                         |                                                                                                                                                                                                                                                                                                                    |                                                                                                                                                                                                                                                         |                                 |                              | P_trifoliata_00082_mRNA_87.1    |
| GF0044981 | 0                            | 0                         | 1                            | Hypothetical protein (1)                                         |                                                                                                                                                                                                                                                                                                                    |                                                                                                                                                                                                                                                         |                                 |                              | P_trifoliata_00082_mRNA_85.1    |

| ID        | Num. in <i>C. clementiae</i> | Num. in <i>C. canihii</i> | Num. in <i>P. trifoliata</i> | Note                                                       | GO                                                                                                                                                                                                                                                                                                                                                                                        | InterPro                                                                                                                                                                                                                                                                                                                                                                                                                                                     | Members in <i>C. clementiae</i> | Members in <i>C. canihii</i> | Members in <i>P. trifoliata</i> |
|-----------|------------------------------|---------------------------|------------------------------|------------------------------------------------------------|-------------------------------------------------------------------------------------------------------------------------------------------------------------------------------------------------------------------------------------------------------------------------------------------------------------------------------------------------------------------------------------------|--------------------------------------------------------------------------------------------------------------------------------------------------------------------------------------------------------------------------------------------------------------------------------------------------------------------------------------------------------------------------------------------------------------------------------------------------------------|---------------------------------|------------------------------|---------------------------------|
| GF0044980 | 0                            | 0                         | 1                            | Hypothetical protein (1)                                   | oxidoreductase activity, acting on paired donors, with incorporation or reduction of molecular oxygen [GO:0016705 molecular_function] (1); oxidation-reduction process [GO:005514 biological_process] (1); iron ion binding [GO:0005506 molecular_function] (1); heme binding [GO:0020037 molecular_function] (1)                                                                         | Cytochrome P450, E-class, group I [IPRO02401] (1); Cytochrome P450 [IPRO1125] (1)                                                                                                                                                                                                                                                                                                                                                                            | -                               | -                            | P_trifoliata_00082_mRNA_77.1    |
| GF0044979 | 0                            | 0                         | 1                            | Cytochrome P450 family 71 protein (1)                      | oxidoreductase activity, acting on paired donors, with incorporation or reduction of molecular oxygen [GO:0016705 molecular_function] (1); oxidation-reduction process [GO:005514 biological_process] (1); iron ion binding [GO:0005506 molecular_function] (1); heme binding [GO:0020037 molecular_function] (1)                                                                         | Cytochrome P450, E-class, group I [IPRO02401] (1); Cytochrome P450 [IPRO1125] (1)                                                                                                                                                                                                                                                                                                                                                                            | -                               | -                            | P_trifoliata_00082_mRNA_76.1    |
| GF0044978 | 0                            | 0                         | 1                            | Hypothetical protein (1)                                   |                                                                                                                                                                                                                                                                                                                                                                                           |                                                                                                                                                                                                                                                                                                                                                                                                                                                              | -                               | -                            | P_trifoliata_00082_mRNA_75.1    |
| GF0044977 | 0                            | 0                         | 1                            | Hypothetical protein (1)                                   |                                                                                                                                                                                                                                                                                                                                                                                           |                                                                                                                                                                                                                                                                                                                                                                                                                                                              | -                               | -                            | P_trifoliata_00082_mRNA_72.1    |
| GF0044976 | 0                            | 0                         | 1                            | Hypothetical protein (1)                                   |                                                                                                                                                                                                                                                                                                                                                                                           |                                                                                                                                                                                                                                                                                                                                                                                                                                                              | -                               | -                            | P_trifoliata_00082_mRNA_56.1    |
| GF0044975 | 0                            | 0                         | 1                            | LRR receptor-like serine/threonine-protein kinase ERL1 (1) | protein binding [GO:0005515 molecular_function] (1); ATP binding [GO:0005524 molecular_function] (1); protein kinase activity [GO:0004672 molecular_function] (1); protein phosphorylation [GO:0006468 biological_process] (1)                                                                                                                                                            | Leucine-rich repeat-containing N-terminal, plant-type [IPRO13210] (1); Serine/threonine-protein kinase, active site [IPRO08271] (1); Protein kinase, ATP binding site [IPRO17441] (1); Serine/threonine/dual specificity protein kinase, catalytic domain [IPRO02290] (1); Leucine-rich repeat [IPRO01611] (1); Protein kinase domain [IPRO00719] (1); Protein kinase-like domain [IPRO11009] (1); Leucine-rich repeat domain, L domain-like [IPRO32675] (1) | -                               | -                            | P_trifoliata_00082_mRNA_51.1    |
| GF0044974 | 0                            | 0                         | 1                            | Hypothetical protein (1)                                   |                                                                                                                                                                                                                                                                                                                                                                                           |                                                                                                                                                                                                                                                                                                                                                                                                                                                              | -                               | -                            | P_trifoliata_00082_mRNA_5.1     |
| GF0044973 | 0                            | 0                         | 1                            | Metacaspase 1 isoform 2 (1)                                |                                                                                                                                                                                                                                                                                                                                                                                           | Caspase-like domain [IPRO29030] (1)                                                                                                                                                                                                                                                                                                                                                                                                                          | -                               | -                            | P_trifoliata_00082_mRNA_4.1     |
| GF0044972 | 0                            | 0                         | 1                            | Hypothetical protein (1)                                   |                                                                                                                                                                                                                                                                                                                                                                                           |                                                                                                                                                                                                                                                                                                                                                                                                                                                              | -                               | -                            | P_trifoliata_00082_mRNA_23.1    |
| GF0044971 | 0                            | 0                         | 1                            | Hypothetical protein (1)                                   |                                                                                                                                                                                                                                                                                                                                                                                           |                                                                                                                                                                                                                                                                                                                                                                                                                                                              | -                               | -                            | P_trifoliata_00082_mRNA_2.1     |
| GF0044970 | 0                            | 0                         | 1                            | Hypothetical protein (1)                                   |                                                                                                                                                                                                                                                                                                                                                                                           |                                                                                                                                                                                                                                                                                                                                                                                                                                                              | -                               | -                            | P_trifoliata_00082_mRNA_1.1     |
| GF0044969 | 0                            | 0                         | 1                            | Hypothetical protein (1)                                   |                                                                                                                                                                                                                                                                                                                                                                                           | Caspase-like domain [IPRO29030] (1)                                                                                                                                                                                                                                                                                                                                                                                                                          | -                               | -                            | P_trifoliata_00081_mRNA_86.1    |
| GF0044968 | 0                            | 0                         | 1                            | Hypothetical protein (1)                                   |                                                                                                                                                                                                                                                                                                                                                                                           | Penanticopeptide repeat [IPRO02885] (1)                                                                                                                                                                                                                                                                                                                                                                                                                      | -                               | -                            | P_trifoliata_00081_mRNA_84.1    |
| GF0044967 | 0                            | 0                         | 1                            | Hypothetical protein (1)                                   | zinc ion binding [GO:0008270 molecular_function] (1); oxidoreductase activity [GO:0016491 molecular_function] (1); oxidation-reduction process [GO:005514 biological_process] (1)                                                                                                                                                                                                         | Alcohol dehydrogenase superfamily, zinc-type [IPRO02085] (1); GroES-like [IPRO11032] (1)                                                                                                                                                                                                                                                                                                                                                                     | -                               | -                            | P_trifoliata_00081_mRNA_8.1     |
| GF0044966 | 0                            | 0                         | 1                            | Hypothetical protein (1)                                   | protein phosphorylation [GO:0006468 biological_process] (1); protein kinase activity [GO:0004672 molecular_function] (1)                                                                                                                                                                                                                                                                  | Serine/threonine/tyrosine-protein kinase catalytic domain [IPRO12481] (1); Leucine-rich repeat domain, L domain-like [IPRO32675] (1); Protein kinase-like domain [IPRO11009] (1)                                                                                                                                                                                                                                                                             | -                               | -                            | P_trifoliata_00081_mRNA_54.1    |
| GF0044965 | 0                            | 0                         | 1                            | Bidirectional sugar transporter SWEET2a (1)                | integral component of membrane [GO:0016021 cellular_component] (1)                                                                                                                                                                                                                                                                                                                        | SWEET2a sugar transporter [IPRO04316] (1)                                                                                                                                                                                                                                                                                                                                                                                                                    | -                               | -                            | P_trifoliata_00081_mRNA_39.1    |
| GF0044964 | 0                            | 0                         | 1                            | Meiosis protein mec1 (1)                                   | nucleic acid binding [GO:0003676 molecular_function] (1); nucleotide binding [GO:0000166 molecular_function] (1)                                                                                                                                                                                                                                                                          | RNA recognition motif domain [IPRO06500] (1); RNA recognition motif 2 [IPRO07201] (1); Nucleotide-binding alpha-beta plat domain [IPRO12677] (1) Probable transposase, Pta/Ea/Spm, plant [IPRO04252] (1)                                                                                                                                                                                                                                                     | -                               | -                            | P_trifoliata_00081_mRNA_28.1    |
| GF0044963 | 0                            | 0                         | 1                            | Hypothetical protein (1)                                   |                                                                                                                                                                                                                                                                                                                                                                                           |                                                                                                                                                                                                                                                                                                                                                                                                                                                              | -                               | -                            | P_trifoliata_00081_mRNA_22.1    |
| GF0044962 | 0                            | 0                         | 1                            | Hypothetical protein (1)                                   |                                                                                                                                                                                                                                                                                                                                                                                           |                                                                                                                                                                                                                                                                                                                                                                                                                                                              | -                               | -                            | P_trifoliata_00081_mRNA_19.1    |
| GF0044961 | 0                            | 0                         | 1                            | Hypothetical protein (1)                                   |                                                                                                                                                                                                                                                                                                                                                                                           |                                                                                                                                                                                                                                                                                                                                                                                                                                                              | -                               | -                            | P_trifoliata_00081_mRNA_18.1    |
| GF0044960 | 0                            | 0                         | 1                            | Hypothetical protein (1)                                   |                                                                                                                                                                                                                                                                                                                                                                                           |                                                                                                                                                                                                                                                                                                                                                                                                                                                              | -                               | -                            | P_trifoliata_00081_mRNA_17.1    |
| GF0044959 | 0                            | 0                         | 1                            | Hypothetical protein (1)                                   |                                                                                                                                                                                                                                                                                                                                                                                           | the fantastase four family [IPRO21410] (1)                                                                                                                                                                                                                                                                                                                                                                                                                   | -                               | -                            | P_trifoliata_00081_mRNA_12.1    |
| GF0044958 | 0                            | 0                         | 1                            | Hypothetical protein (1)                                   |                                                                                                                                                                                                                                                                                                                                                                                           |                                                                                                                                                                                                                                                                                                                                                                                                                                                              | -                               | -                            | P_trifoliata_00081_mRNA_1.1     |
| GF0044957 | 0                            | 0                         | 1                            | Hypothetical protein (1)                                   |                                                                                                                                                                                                                                                                                                                                                                                           |                                                                                                                                                                                                                                                                                                                                                                                                                                                              | -                               | -                            | P_trifoliata_00080_mRNA_8.1     |
| GF0044956 | 0                            | 0                         | 1                            | Hypothetical protein (1)                                   |                                                                                                                                                                                                                                                                                                                                                                                           |                                                                                                                                                                                                                                                                                                                                                                                                                                                              | -                               | -                            | P_trifoliata_00080_mRNA_69.1    |
| GF0044955 | 0                            | 0                         | 1                            | Homogenisate phytyltransferase (1)                         | integral component of membrane [GO:0016021 cellular_component] (1); prenyltransferase activity [GO:0004659 molecular_function] (1)                                                                                                                                                                                                                                                        | UBA prenyltransferase family [IPRO00537] (1)                                                                                                                                                                                                                                                                                                                                                                                                                 | -                               | -                            | P_trifoliata_00080_mRNA_68.1    |
| GF0044954 | 0                            | 0                         | 1                            | Hypothetical protein (1)                                   |                                                                                                                                                                                                                                                                                                                                                                                           |                                                                                                                                                                                                                                                                                                                                                                                                                                                              | -                               | -                            | P_trifoliata_00080_mRNA_62.1    |
| GF0044953 | 0                            | 0                         | 1                            | Hypothetical protein (1)                                   | (1->3)-beta-D-glucan biosynthetic process [GO:0006075 biological_process] (1); 1,3-beta-D-glucan synthase activity [GO:0003843 molecular_function] (1); 1,3-beta-D-glucan synthase complex [GO:0000148 cellular_component] (1); membrane [GO:0016020 cellular_component] (1)                                                                                                              | Glycosyl transferase, family 48 [IPRO03440] (1)                                                                                                                                                                                                                                                                                                                                                                                                              | -                               | -                            | P_trifoliata_00080_mRNA_60.1    |
| GF0044952 | 0                            | 0                         | 1                            | Hypothetical protein (1)                                   |                                                                                                                                                                                                                                                                                                                                                                                           |                                                                                                                                                                                                                                                                                                                                                                                                                                                              | -                               | -                            | P_trifoliata_00080_mRNA_58.1    |
| GF0044951 | 0                            | 0                         | 1                            | Hypothetical protein (1)                                   |                                                                                                                                                                                                                                                                                                                                                                                           |                                                                                                                                                                                                                                                                                                                                                                                                                                                              | -                               | -                            | P_trifoliata_00080_mRNA_57.1    |
| GF0044950 | 0                            | 0                         | 1                            | Hypothetical protein (1)                                   |                                                                                                                                                                                                                                                                                                                                                                                           |                                                                                                                                                                                                                                                                                                                                                                                                                                                              | -                               | -                            | P_trifoliata_00080_mRNA_53.1    |
| GF0044949 | 0                            | 0                         | 1                            | Hypothetical protein (1)                                   |                                                                                                                                                                                                                                                                                                                                                                                           |                                                                                                                                                                                                                                                                                                                                                                                                                                                              | -                               | -                            | P_trifoliata_00080_mRNA_52.1    |
| GF0044948 | 0                            | 0                         | 1                            | Hypothetical protein (1)                                   |                                                                                                                                                                                                                                                                                                                                                                                           |                                                                                                                                                                                                                                                                                                                                                                                                                                                              | -                               | -                            | P_trifoliata_00080_mRNA_49.1    |
| GF0044947 | 0                            | 0                         | 1                            | Hypothetical protein (1)                                   | ATP binding [GO:0005524 molecular_function] (1); protein phosphorylation [GO:0006468 biological_process] (1); protein kinase activity [GO:0004672 molecular_function] (1)                                                                                                                                                                                                                 | Serine/threonine-protein kinase, active site [IPRO08271] (1); Serine/threonine/dual specificity protein kinase, catalytic domain [IPRO02290] (1); Serine/threonine/tyrosine-protein kinase catalytic domain [IPRO01245] (1); Protein kinase domain [IPRO00719] (1); Leucine-rich repeat domain, L domain-like [IPRO32675] (1); Protein kinase-like domain [IPRO11009] (1)                                                                                    | -                               | -                            | P_trifoliata_00080_mRNA_47.1    |
| GF0044946 | 0                            | 0                         | 1                            | Hypothetical protein (1)                                   |                                                                                                                                                                                                                                                                                                                                                                                           | Reverse transcriptase, RNA-dependent DNA polymerase [IPRO13103] (1)                                                                                                                                                                                                                                                                                                                                                                                          | -                               | -                            | P_trifoliata_00080_mRNA_37.1    |
| GF0044945 | 0                            | 0                         | 1                            | Hypothetical protein (1)                                   | nucleic acid binding [GO:0003676 molecular_function] (1); zinc ion binding [GO:0008270 molecular_function] (1)                                                                                                                                                                                                                                                                            | Protein of unknown function DUF247, plant [IPRO04158] (1); Zinc finger, CCHC-type [IPRO01878] (1); Domain of unknown function DUF4283 [IPRO25558] (1)                                                                                                                                                                                                                                                                                                        | -                               | -                            | P_trifoliata_00080_mRNA_36.1    |
| GF0044944 | 0                            | 0                         | 1                            | UPF0481 protein (1)                                        |                                                                                                                                                                                                                                                                                                                                                                                           | Protein of unknown function DUF247, plant [IPRO04158] (1)                                                                                                                                                                                                                                                                                                                                                                                                    | -                               | -                            | P_trifoliata_00080_mRNA_33.1    |
| GF0044943 | 0                            | 0                         | 1                            | Hypothetical protein (1)                                   |                                                                                                                                                                                                                                                                                                                                                                                           |                                                                                                                                                                                                                                                                                                                                                                                                                                                              | -                               | -                            | P_trifoliata_00080_mRNA_3.1     |
| GF0044942 | 0                            | 0                         | 1                            | Hypothetical protein (1)                                   | photosystem I [GO:0009522 cellular_component] (1); chlorophyll binding [GO:0016168 molecular_function] (1); membrane [GO:0016020 cellular_component] (1); photosynthesis [GO:0015979 biological_process] (1)                                                                                                                                                                              | Photosystem I PsuK, reaction centre, plant [IPRO17493] (1); Photosystem I PsuK/PsuK domain [IPRO02618] (1); Photosystem I PsuK/PsuK protein [IPRO00549] (1); Protein of unknown function DUF247, plant [IPRO04158] (1)                                                                                                                                                                                                                                       | -                               | -                            | P_trifoliata_00080_mRNA_28.1    |
| GF0044941 | 0                            | 0                         | 1                            | Hypothetical protein (1)                                   |                                                                                                                                                                                                                                                                                                                                                                                           | PGG domain [IPRO26961] (1)                                                                                                                                                                                                                                                                                                                                                                                                                                   | -                               | -                            | P_trifoliata_00080_mRNA_2.1     |
| GF0044940 | 0                            | 0                         | 1                            | Hypothetical protein (1)                                   |                                                                                                                                                                                                                                                                                                                                                                                           |                                                                                                                                                                                                                                                                                                                                                                                                                                                              | -                               | -                            | P_trifoliata_00080_mRNA_14.1    |
| GF0044939 | 0                            | 0                         | 1                            | Ankyrin repeat family protein, putative (1)                | protein binding [GO:0005515 molecular_function] (1)                                                                                                                                                                                                                                                                                                                                       | Ankyrin repeat-containing domain [IPRO09653] (1); Ankyrin repeat [IPRO02110] (1)                                                                                                                                                                                                                                                                                                                                                                             | -                               | -                            | P_trifoliata_00080_mRNA_1.1     |
| GF0044938 | 0                            | 0                         | 1                            | Hypothetical protein (1)                                   | binding [GO:0005488 molecular_function] (1)                                                                                                                                                                                                                                                                                                                                               | Armadillo-like helical [IPRO11989] (1); Armadillo-type fold [IPRO16024] (1)                                                                                                                                                                                                                                                                                                                                                                                  | -                               | -                            | P_trifoliata_00079_mRNA_91.1    |
| GF0044937 | 0                            | 0                         | 1                            | Hypothetical protein (1)                                   | integral component of membrane [GO:0016021 cellular_component] (1); ATPase activity [GO:0016887 molecular_function] (1); transport [GO:0006810 biological_process] (1); ATPase activity, coupled to transmembrane movement of substance [GO:0042626 molecular_function] (1); ATP binding [GO:0005524 molecular_function] (1); transmembrane transport [GO:0055085 biological_process] (1) | P-loop containing nucleoside triphosphate hydrolase [IPRO27417] (1); ABC transporter type 1, transmembrane domain [IPRO11527] (1); ABC transporter-like [IPRO03439] (1)                                                                                                                                                                                                                                                                                      | -                               | -                            | P_trifoliata_00079_mRNA_89.1    |
| GF0044936 | 0                            | 0                         | 1                            | Hypothetical protein (1)                                   |                                                                                                                                                                                                                                                                                                                                                                                           |                                                                                                                                                                                                                                                                                                                                                                                                                                                              | -                               | -                            | P_trifoliata_00079_mRNA_82.1    |
| GF0044935 | 0                            | 0                         | 1                            | Hypothetical protein (1)                                   |                                                                                                                                                                                                                                                                                                                                                                                           |                                                                                                                                                                                                                                                                                                                                                                                                                                                              | -                               | -                            | P_trifoliata_00079_mRNA_8.1     |
| GF0044934 | 0                            | 0                         | 1                            | Hypothetical protein (1)                                   |                                                                                                                                                                                                                                                                                                                                                                                           |                                                                                                                                                                                                                                                                                                                                                                                                                                                              | -                               | -                            | P_trifoliata_00079_mRNA_76.1    |
| GF0044933 | 0                            | 0                         | 1                            | Hypothetical protein (1)                                   |                                                                                                                                                                                                                                                                                                                                                                                           | Pyrrolo-quinoline quinone repeat [IPRO02372] (1); Quinoxaline alcohol dehydrogenase-like superfamily [IPRO11047] (1); Pyrrolo-quinoline quinone beta-propeller repeat [IPRO18391] (1); Quinoxaline alcohol dehydrogenase-like domain [IPRO027295] (1)                                                                                                                                                                                                        | -                               | -                            | P_trifoliata_00079_mRNA_70.1    |
| GF0044932 | 0                            | 0                         | 1                            | Hypothetical protein (1)                                   |                                                                                                                                                                                                                                                                                                                                                                                           | Pectin lyase fold [IPRO12334] (1); Pectin lyase fold/virulence factor [IPRO11050] (1); AmbAllergen [IPRO18082] (1)                                                                                                                                                                                                                                                                                                                                           | -                               | -                            | P_trifoliata_00079_mRNA_61.1    |
| GF0044931 | 0                            | 0                         | 1                            | Hypothetical protein (1)                                   |                                                                                                                                                                                                                                                                                                                                                                                           |                                                                                                                                                                                                                                                                                                                                                                                                                                                              | -                               | -                            | P_trifoliata_00079_mRNA_6.1     |
| GF0044930 | 0                            | 0                         | 1                            | Hypothetical protein (1)                                   |                                                                                                                                                                                                                                                                                                                                                                                           | ATPase, AAA-type, conserved site [IPRO03960] (1); P-loop containing nucleoside triphosphate hydrolase [IPRO27417] (1); ATPase, AAA-type, core [IPRO03959] (1); AAA+ ATPase domain [IPRO03593] (1)                                                                                                                                                                                                                                                            | -                               | -                            | P_trifoliata_00079_mRNA_59.1    |
| GF0044929 | 0                            | 0                         | 1                            | Putative mitochondrial chaperone BCS1-1 (1)                | ATP binding [GO:0005524 molecular_function] (1)                                                                                                                                                                                                                                                                                                                                           | ATPase, AAA-type, conserved site [IPRO03960] (1); P-loop containing nucleoside triphosphate hydrolase [IPRO27417] (1); ATPase, AAA-type, core [IPRO03959] (1); AAA+ ATPase domain [IPRO03593] (1)                                                                                                                                                                                                                                                            | -                               | -                            | P_trifoliata_00079_mRNA_41.1    |
| GF0044928 | 0                            | 0                         | 1                            | Hypothetical protein (1)                                   |                                                                                                                                                                                                                                                                                                                                                                                           |                                                                                                                                                                                                                                                                                                                                                                                                                                                              | -                               | -                            | P_trifoliata_00079_mRNA_4.1     |
| GF0044927 | 0                            | 0                         | 1                            | Hypothetical protein (1)                                   |                                                                                                                                                                                                                                                                                                                                                                                           | AAA-type ATPase, N-terminal domain [IPRO25753] (1)                                                                                                                                                                                                                                                                                                                                                                                                           | -                               | -                            | P_trifoliata_00079_mRNA_38.1    |
| GF0044926 | 0                            | 0                         | 1                            | Hypothetical protein (1)                                   |                                                                                                                                                                                                                                                                                                                                                                                           |                                                                                                                                                                                                                                                                                                                                                                                                                                                              | -                               | -                            | P_trifoliata_00079_mRNA_3.1     |

| ID        | Num. in <i>C. clementiae</i> | Num. in <i>C. canthii</i> | Num. in <i>P. trifoliata</i> | Note                                                         | GO                                                                                                                                                                                                                                                                                                                                                                                                                                                                                                                                                                                            | InterPro                                                                                                                                                                                                                                                                                                                                                                                              | Members in <i>C. clementiae</i> | Members in <i>C. canthii</i> | Members in <i>P. trifoliata</i> |
|-----------|------------------------------|---------------------------|------------------------------|--------------------------------------------------------------|-----------------------------------------------------------------------------------------------------------------------------------------------------------------------------------------------------------------------------------------------------------------------------------------------------------------------------------------------------------------------------------------------------------------------------------------------------------------------------------------------------------------------------------------------------------------------------------------------|-------------------------------------------------------------------------------------------------------------------------------------------------------------------------------------------------------------------------------------------------------------------------------------------------------------------------------------------------------------------------------------------------------|---------------------------------|------------------------------|---------------------------------|
| GF0044925 | 0                            | 0                         | 1                            | Hypothetical protein (1)                                     | nucleic acid binding [GO:0003676 molecular_function (1)]; protein dimerization activity [GO:0046083 molecular_function (1)]; hydrolase activity [GO:0016787 molecular_function (1)]                                                                                                                                                                                                                                                                                                                                                                                                           | Ribonuclease H-like domain [IPR012337] (1); MLDIX hydrolase domain-like [IPR015797] (1); NUDIX hydrolase domain [IPR000086] (1); HAT, C-terminal dimerization domain [IPR008966] (1)                                                                                                                                                                                                                  | -                               | -                            | P_trifoliata_00079_mRNA_2,1     |
| GF0044924 | 0                            | 0                         | 1                            | Hypothetical protein (1)                                     |                                                                                                                                                                                                                                                                                                                                                                                                                                                                                                                                                                                               |                                                                                                                                                                                                                                                                                                                                                                                                       |                                 |                              | P_trifoliata_00079_mRNA_13,1    |
| GF0044923 | 0                            | 0                         | 1                            | Hypothetical protein (1)                                     |                                                                                                                                                                                                                                                                                                                                                                                                                                                                                                                                                                                               |                                                                                                                                                                                                                                                                                                                                                                                                       |                                 |                              | P_trifoliata_00079_mRNA_1,1     |
| GF0044922 | 0                            | 0                         | 1                            | Hypothetical protein (1)                                     | membrane [GO:0016020 cellular_component (1)]                                                                                                                                                                                                                                                                                                                                                                                                                                                                                                                                                  | Calcium-dependent channel, 7TM region, putative phosphate [IPR003864] (1)                                                                                                                                                                                                                                                                                                                             | -                               | -                            | P_trifoliata_00078_mRNA_88,1    |
| GF0044921 | 0                            | 0                         | 1                            | Hypothetical protein (1)                                     |                                                                                                                                                                                                                                                                                                                                                                                                                                                                                                                                                                                               |                                                                                                                                                                                                                                                                                                                                                                                                       |                                 |                              | P_trifoliata_00078_mRNA_78,1    |
| GF0044920 | 0                            | 0                         | 1                            | Hypothetical protein (1)                                     |                                                                                                                                                                                                                                                                                                                                                                                                                                                                                                                                                                                               |                                                                                                                                                                                                                                                                                                                                                                                                       |                                 |                              | P_trifoliata_00078_mRNA_5,1     |
| GF0044919 | 0                            | 0                         | 1                            | Hypothetical protein (1)                                     | response to oxidative stress [GO:0006979 biological_process (1)]; heme binding [GO:0020037 molecular_function (1)]; peroxidase activity [GO:0004600 molecular_function (1)]; oxidation-reduction process [GO:005514 biological_process (1)]                                                                                                                                                                                                                                                                                                                                                   | RNA polymerase I specific transcription initiation factor RRN3 [IPR007991] (1)<br>Haem peroxidase [IPR010255] (1); Plant ascorbate peroxidase [IPR002207] (1); Peroxidase, active site [IPR019794] (1); Haem peroxidase, plant/fungal/bacterial [IPR020165] (1)                                                                                                                                       | -                               | -                            | P_trifoliata_00078_mRNA_12,1    |
| GF0044918 | 0                            | 0                         | 1                            | Hypothetical protein (1)                                     |                                                                                                                                                                                                                                                                                                                                                                                                                                                                                                                                                                                               |                                                                                                                                                                                                                                                                                                                                                                                                       |                                 |                              | P_trifoliata_00078_mRNA_109,1   |
| GF0044917 | 0                            | 0                         | 1                            | Hypothetical protein (1)                                     | small GTPase mediated signal transduction [GO:007264 biological_process (1)]; nucleocytoplasmic transport [GO:0006913 biological_process (1)]; membrane [GO:0016020 cellular_component (1)]; signal transduction [GO:0007165 biological_process (1)]; GTP binding [GO:0005235 molecular_function (1)]; intracellular protein transport [GO:0006886 biological_process (1)]; intracellular [GO:0005622 cellular_component (1)]; GTPase activity [GO:0003924 molecular_function (1)]; RNA processing [GO:0008033 biological_process (1)]; protein transport [GO:0015031 biological_process (1)] | Small GTPase superfamily, Ras type [IPR020849] (1); Small GTPase superfamily, Rab type [IPR035781] (1); Small GTP-binding protein domain [IPR005225] (1); P-loop containing nucleoside triphosphate hydrolase [IPR027417] (1); Small GTPase superfamily [IPR01806] (1); rRNA dimethylallyltransferase [IPR018022] (1); Ras GTPase [IPR020411] (1); Small GTPase superfamily, Rab type [IPR003579] (1) | -                               | -                            | P_trifoliata_00078_mRNA_103,1   |
| GF0044915 | 0                            | 0                         | 1                            | Hypothetical protein (1)                                     |                                                                                                                                                                                                                                                                                                                                                                                                                                                                                                                                                                                               |                                                                                                                                                                                                                                                                                                                                                                                                       |                                 |                              | P_trifoliata_00077_mRNA_85,1    |
| GF0044914 | 0                            | 0                         | 1                            | Hypothetical protein (1)                                     |                                                                                                                                                                                                                                                                                                                                                                                                                                                                                                                                                                                               |                                                                                                                                                                                                                                                                                                                                                                                                       |                                 |                              | P_trifoliata_00077_mRNA_83,1    |
| GF0044913 | 0                            | 0                         | 1                            | Sulfotransferase (1)                                         | sulfotransferase activity [GO:0008146 molecular_function (1)]                                                                                                                                                                                                                                                                                                                                                                                                                                                                                                                                 | P-loop containing nucleoside triphosphate hydrolase [IPR027417] (1); Sulfotransferase domain [IPR000863] (1)                                                                                                                                                                                                                                                                                          | -                               | -                            | P_trifoliata_00077_mRNA_82,1    |
| GF0044912 | 0                            | 0                         | 1                            | Hypothetical protein (1)                                     |                                                                                                                                                                                                                                                                                                                                                                                                                                                                                                                                                                                               |                                                                                                                                                                                                                                                                                                                                                                                                       |                                 |                              | P_trifoliata_00077_mRNA_78,1    |
| GF0044911 | 0                            | 0                         | 1                            | Hypothetical protein (1)                                     |                                                                                                                                                                                                                                                                                                                                                                                                                                                                                                                                                                                               |                                                                                                                                                                                                                                                                                                                                                                                                       |                                 |                              | P_trifoliata_00077_mRNA_77,1    |
| GF0044910 | 0                            | 0                         | 1                            | Hypothetical protein (1)                                     |                                                                                                                                                                                                                                                                                                                                                                                                                                                                                                                                                                                               |                                                                                                                                                                                                                                                                                                                                                                                                       |                                 |                              | P_trifoliata_00077_mRNA_75,1    |
| GF0044909 | 0                            | 0                         | 1                            | 50S ribosomal protein L12, chloroplast (1)                   | intracellular [GO:0005622 cellular_component (1)]; translation [GO:0006412 biological_process (1)]; structural constituent of ribosome [GO:0005735 molecular_function (1)]; ribosome [GO:0005840 cellular_component (1)]                                                                                                                                                                                                                                                                                                                                                                      | Ribosomal protein L7/L12, C-terminal/adaptor protein ClpS-like [IPR014718] (1); Ribosomal protein L7/L12, C-terminal [IPR013823] (1); Ribosomal protein L7/L12, oligomerisation [IPR008932] (1)                                                                                                                                                                                                       | -                               | -                            | P_trifoliata_00077_mRNA_71,1    |
| GF0044908 | 0                            | 0                         | 1                            | Hypothetical protein (1)                                     |                                                                                                                                                                                                                                                                                                                                                                                                                                                                                                                                                                                               | PWWP domain [IPR000313] (1)                                                                                                                                                                                                                                                                                                                                                                           | -                               | -                            | P_trifoliata_00077_mRNA_70,1    |
| GF0044907 | 0                            | 0                         | 1                            | Carbonate dehydratase (1)                                    | carbonate dehydratase activity [GO:0004089 molecular_function (1)]; zinc ion binding [GO:0008270 molecular_function (1)]; carbon sulfuration [GO:0015976 biological_process (1)]; protein binding [GO:0005515 molecular_function (1)]; serine-type endopeptidase activity [GO:0004252 molecular_function (1)]; proteolysis [GO:0006508 biological_process (1)]                                                                                                                                                                                                                                | Carbonic anhydrase, prokaryotic-like, conserved lile [IPR015822] (1); Carbonic anhydrase [IPR001766] (1)                                                                                                                                                                                                                                                                                              | -                               | -                            | P_trifoliata_00077_mRNA_57,1    |
| GF0044906 | 0                            | 0                         | 1                            | Trypsin-like serine protease (1)                             |                                                                                                                                                                                                                                                                                                                                                                                                                                                                                                                                                                                               | PDZ domain [IPR001478] (1); Peptidase S1C [IPR001940] (1); Peptidase S1, PA clan [IPR009003] (1)                                                                                                                                                                                                                                                                                                      | -                               | -                            | P_trifoliata_00077_mRNA_55,2    |
| GF0044905 | 0                            | 0                         | 1                            | Hypothetical protein (1)                                     |                                                                                                                                                                                                                                                                                                                                                                                                                                                                                                                                                                                               |                                                                                                                                                                                                                                                                                                                                                                                                       |                                 |                              | P_trifoliata_00077_mRNA_48,1    |
| GF0044904 | 0                            | 0                         | 1                            | Hypothetical protein (1)                                     |                                                                                                                                                                                                                                                                                                                                                                                                                                                                                                                                                                                               |                                                                                                                                                                                                                                                                                                                                                                                                       |                                 |                              | P_trifoliata_00077_mRNA_4,1     |
| GF0044903 | 0                            | 0                         | 1                            | Hypothetical protein (1)                                     |                                                                                                                                                                                                                                                                                                                                                                                                                                                                                                                                                                                               |                                                                                                                                                                                                                                                                                                                                                                                                       |                                 |                              | P_trifoliata_00077_mRNA_34,1    |
| GF0044902 | 0                            | 0                         | 1                            | Hypothetical protein (1)                                     | transferase activity, transferring hexosyl groups [GO:0016758 molecular_function (1)]; metabolic process [GO:0008152 biological_process (1)]                                                                                                                                                                                                                                                                                                                                                                                                                                                  | UDP-glucuronosyl/UDP-glucosyltransferase [IPR002213] (1)                                                                                                                                                                                                                                                                                                                                              | -                               | -                            | P_trifoliata_00077_mRNA_27,1    |
| GF0044901 | 0                            | 0                         | 1                            | Ubiquitin-conjugating enzyme E2-23 kDa (1)                   |                                                                                                                                                                                                                                                                                                                                                                                                                                                                                                                                                                                               | Ubiquitin-conjugating enzyme RWD-like [IPR016135] (1); Ubiquitin-conjugating enzyme E2 [IPR000608] (1)                                                                                                                                                                                                                                                                                                | -                               | -                            | P_trifoliata_00077_mRNA_17,1    |
| GF0044900 | 0                            | 0                         | 1                            | Hypothetical protein (1)                                     | integral component of membrane [GO:0016021 cellular_component (1)]; membrane [GO:0016020 cellular_component (1)]; protein binding [GO:0005515 molecular_function (1)]; proteolysis [GO:0006508 biological_process (1)]; serine-type endopeptidase activity [GO:0004252 molecular_function (1)]                                                                                                                                                                                                                                                                                                | Peptidase S1C [IPR001940] (1); PDZ domain [IPR001478] (1); EamA domain [IPR000626] (1); Peptidase S1, PA clan [IPR009003] (1)                                                                                                                                                                                                                                                                         | -                               | -                            | P_trifoliata_00077_mRNA_10,1    |
| GF0044898 | 0                            | 0                         | 1                            | Hypothetical protein (1)                                     |                                                                                                                                                                                                                                                                                                                                                                                                                                                                                                                                                                                               |                                                                                                                                                                                                                                                                                                                                                                                                       |                                 |                              | P_trifoliata_00076_mRNA_9,1     |
| GF0044897 | 0                            | 0                         | 1                            | Hypothetical protein (1)                                     |                                                                                                                                                                                                                                                                                                                                                                                                                                                                                                                                                                                               |                                                                                                                                                                                                                                                                                                                                                                                                       |                                 |                              | P_trifoliata_00076_mRNA_74,1    |
| GF0044896 | 0                            | 0                         | 1                            | Hypothetical protein (1)                                     | intracellular [GO:0005622 cellular_component (1)]; translation [GO:0006412 biological_process (1)]; structural constituent of ribosome [GO:0005735 molecular_function (1)]; ribosome [GO:0005840 cellular_component (1)]                                                                                                                                                                                                                                                                                                                                                                      | Ribosomal protein L14 [IPR002784] (1); NraA-like domain [IPR00830] (1); Ribosomal protein L2 domain 2 [IPR014722] (1); Translation protein S16-like domain [IPR008991] (1); NAD(P)-binding domain [IPR016040] (1)                                                                                                                                                                                     | -                               | -                            | P_trifoliata_00076_mRNA_71,1    |
| GF0044895 | 0                            | 0                         | 1                            | Hypothetical protein (1)                                     |                                                                                                                                                                                                                                                                                                                                                                                                                                                                                                                                                                                               |                                                                                                                                                                                                                                                                                                                                                                                                       |                                 |                              | P_trifoliata_00076_mRNA_69,1    |
| GF0044894 | 0                            | 0                         | 1                            | Hypothetical protein (1)                                     |                                                                                                                                                                                                                                                                                                                                                                                                                                                                                                                                                                                               |                                                                                                                                                                                                                                                                                                                                                                                                       |                                 |                              | P_trifoliata_00076_mRNA_67,1    |
| GF0044893 | 0                            | 0                         | 1                            | Hypothetical protein (1)                                     |                                                                                                                                                                                                                                                                                                                                                                                                                                                                                                                                                                                               |                                                                                                                                                                                                                                                                                                                                                                                                       |                                 |                              | P_trifoliata_00076_mRNA_61,1    |
| GF0044892 | 0                            | 0                         | 1                            | Hypothetical protein (1)                                     |                                                                                                                                                                                                                                                                                                                                                                                                                                                                                                                                                                                               |                                                                                                                                                                                                                                                                                                                                                                                                       |                                 |                              | P_trifoliata_00076_mRNA_6,1     |
| GF0044891 | 0                            | 0                         | 1                            | Hypothetical protein (1)                                     |                                                                                                                                                                                                                                                                                                                                                                                                                                                                                                                                                                                               |                                                                                                                                                                                                                                                                                                                                                                                                       |                                 |                              | P_trifoliata_00076_mRNA_53,1    |
| GF0044890 | 0                            | 0                         | 1                            | Hypothetical protein (1)                                     |                                                                                                                                                                                                                                                                                                                                                                                                                                                                                                                                                                                               |                                                                                                                                                                                                                                                                                                                                                                                                       |                                 |                              | P_trifoliata_00076_mRNA_52,1    |
| GF0044889 | 0                            | 0                         | 1                            | Cytochrome P450 (1)                                          | iron ion binding [GO:0005506 molecular_function (1)]; heme binding [GO:0020037 molecular_function (1)]; oxidoreductase activity, acting on paired donors, with incorporation or reduction of molecular oxygen [GO:0016705 molecular_function (1)]; oxidation-reduction process [GO:005514 biological_process (1)]                                                                                                                                                                                                                                                                             | Cytochrome P450 [IPR001128] (1)                                                                                                                                                                                                                                                                                                                                                                       | -                               | -                            | P_trifoliata_00076_mRNA_50,1    |
| GF0044888 | 0                            | 0                         | 1                            | Hypothetical protein (1)                                     |                                                                                                                                                                                                                                                                                                                                                                                                                                                                                                                                                                                               |                                                                                                                                                                                                                                                                                                                                                                                                       |                                 |                              | P_trifoliata_00076_mRNA_5,1     |
| GF0044887 | 0                            | 0                         | 1                            | Hypothetical protein (1)                                     |                                                                                                                                                                                                                                                                                                                                                                                                                                                                                                                                                                                               |                                                                                                                                                                                                                                                                                                                                                                                                       |                                 |                              | P_trifoliata_00076_mRNA_46,1    |
| GF0044886 | 0                            | 0                         | 1                            | Similarity to non-LTR retroelement reverse transcriptase (1) |                                                                                                                                                                                                                                                                                                                                                                                                                                                                                                                                                                                               | Reverse transcriptase domain [IPR000477] (1)                                                                                                                                                                                                                                                                                                                                                          | -                               | -                            | P_trifoliata_00076_mRNA_41,1    |
| GF0044885 | 0                            | 0                         | 1                            | Hypothetical protein (1)                                     | transferase activity, transferring acyl groups other than amino-acyl groups [GO:0016747 molecular_function (1)]                                                                                                                                                                                                                                                                                                                                                                                                                                                                               | Chloramphenicol acetyltransferase-like domain [IPR023213] (1); Transferase [IPR003480] (1)                                                                                                                                                                                                                                                                                                            | -                               | -                            | P_trifoliata_00076_mRNA_4,1     |
| GF0044884 | 0                            | 0                         | 1                            | Hypothetical protein (1)                                     |                                                                                                                                                                                                                                                                                                                                                                                                                                                                                                                                                                                               | Ankyrin repeat-containing domain [IPR020683] (1); PGG domain [IPR025961] (1)                                                                                                                                                                                                                                                                                                                          | -                               | -                            | P_trifoliata_00076_mRNA_39,1    |
| GF0044883 | 0                            | 0                         | 1                            | Ankyrin repeat family protein, putative (1)                  | protein binding [GO:0005515 molecular_function (1)]                                                                                                                                                                                                                                                                                                                                                                                                                                                                                                                                           | Ankyrin repeat [IPR002110] (1); Ankyrin repeat-containing domain [IPR020683] (1); PGG domain [IPR025961] (1)                                                                                                                                                                                                                                                                                          | -                               | -                            | P_trifoliata_00076_mRNA_36,1    |
| GF0044882 | 0                            | 0                         | 1                            | Hypothetical protein (1)                                     |                                                                                                                                                                                                                                                                                                                                                                                                                                                                                                                                                                                               |                                                                                                                                                                                                                                                                                                                                                                                                       |                                 |                              | P_trifoliata_00076_mRNA_33,1    |
| GF0044881 | 0                            | 0                         | 1                            | Glutathione S-transferase tau 7, putative (1)                |                                                                                                                                                                                                                                                                                                                                                                                                                                                                                                                                                                                               | Glutathione S-transferase, C-terminal-like [IPR010987] (1); Glutathione S-transferase, C-terminal [IPR04046] (1); Transferase [IPR003480] (1)                                                                                                                                                                                                                                                         | -                               | -                            | P_trifoliata_00076_mRNA_32,1    |
| GF0044880 | 0                            | 0                         | 1                            | Vinorepine synthase (1)                                      | transferase activity, transferring acyl groups other than amino-acyl groups [GO:0016747 molecular_function (1)]                                                                                                                                                                                                                                                                                                                                                                                                                                                                               | Chloramphenicol acetyltransferase-like domain [IPR023213] (1)                                                                                                                                                                                                                                                                                                                                         | -                               | -                            | P_trifoliata_00076_mRNA_3,1     |
| GF0044879 | 0                            | 0                         | 1                            | Hypothetical protein (1)                                     |                                                                                                                                                                                                                                                                                                                                                                                                                                                                                                                                                                                               | Transposase, MuDR, plant [IPR004332] (1)                                                                                                                                                                                                                                                                                                                                                              | -                               | -                            | P_trifoliata_00076_mRNA_23,1    |
| GF0044878 | 0                            | 0                         | 1                            | Vinorepine synthase (1)                                      | transferase activity, transferring acyl groups other than amino-acyl groups [GO:0016747 molecular_function (1)]                                                                                                                                                                                                                                                                                                                                                                                                                                                                               | Chloramphenicol acetyltransferase-like domain [IPR023213] (1); Transferase [IPR003480] (1)                                                                                                                                                                                                                                                                                                            | -                               | -                            | P_trifoliata_00076_mRNA_17,1    |
| GF0044877 | 0                            | 0                         | 1                            | Hypothetical protein (1)                                     |                                                                                                                                                                                                                                                                                                                                                                                                                                                                                                                                                                                               | Transposase, MuDR, plant [IPR004332] (1)                                                                                                                                                                                                                                                                                                                                                              | -                               | -                            | P_trifoliata_00076_mRNA_13,1    |
| GF0044876 | 0                            | 0                         | 1                            | Hypothetical protein (1)                                     |                                                                                                                                                                                                                                                                                                                                                                                                                                                                                                                                                                                               |                                                                                                                                                                                                                                                                                                                                                                                                       |                                 |                              | P_trifoliata_00076_mRNA_12,1    |
| GF0044875 | 0                            | 0                         | 1                            | Hypothetical protein (1)                                     |                                                                                                                                                                                                                                                                                                                                                                                                                                                                                                                                                                                               |                                                                                                                                                                                                                                                                                                                                                                                                       |                                 |                              | P_trifoliata_00075_mRNA_9,1     |
| GF0044874 | 0                            | 0                         | 1                            | Basic 7S globulin (1)                                        | aspartic-type endopeptidase activity [GO:0004190 molecular_function (1)]; proteolysis [GO:0006508 biological_process (1)]                                                                                                                                                                                                                                                                                                                                                                                                                                                                     | Aspartic peptidase domain [IPR021109] (1); Xylanase inhibitor, N-terminal [IPR022861] (1); Xylanase inhibitor, C-terminal [IPR032799] (1); Aspartic peptidase A1 family [IPR001461] (1)                                                                                                                                                                                                               | -                               | -                            | P_trifoliata_00075_mRNA_86,1    |

| ID        | Num. in <i>C. clementiae</i> | Num. in <i>C. unshii</i> | Num. in <i>P. trifoliata</i> | Note                                                             | GO                                                                                                                                                                                       | InterPro                                                                                                                                                                                                                                                                          | Members in <i>C. clementiae</i> | Members in <i>C. unshii</i> | Members in <i>P. trifoliata</i> |
|-----------|------------------------------|--------------------------|------------------------------|------------------------------------------------------------------|------------------------------------------------------------------------------------------------------------------------------------------------------------------------------------------|-----------------------------------------------------------------------------------------------------------------------------------------------------------------------------------------------------------------------------------------------------------------------------------|---------------------------------|-----------------------------|---------------------------------|
| GF0044873 | 0                            | 0                        | 1                            | Heterogeneous nuclear ribonucleoprotein A3 (1)                   | nucleic acid binding [GO:0003676 molecular_function] (1); nucleotide binding [GO:0000166 molecular_function] (1)                                                                         | Nucleotide-binding alpha beta plat domain [IPR012877] (1); RNA recognition motif domain [IPR000504] (1)                                                                                                                                                                           | -                               | -                           | P_trifoliata_00075_mRNA_72.1    |
| GF0044872 | 0                            | 0                        | 1                            | Rhodanese/cell cycle control phosphatase superfamily protein (1) | -                                                                                                                                                                                        | Rhodanese-like domain [IPR001763] (1)                                                                                                                                                                                                                                             | -                               | -                           | P_trifoliata_00075_mRNA_63.1    |
| GF0044871 | 0                            | 0                        | 1                            | Hypothetical protein (1)                                         | -                                                                                                                                                                                        | -                                                                                                                                                                                                                                                                                 | -                               | -                           | P_trifoliata_00075_mRNA_6.1     |
| GF0044870 | 0                            | 0                        | 1                            | Hypothetical protein (1)                                         | membrane [GO:0016020 cellular_component] (1); transmembrane transporter activity [GO:0022857 molecular_function] (1); integral component of membrane [GO:0016021 cellular_component] (1) | EamA domain [IPR000620] (1); WAT1-related protein [IPR03184] (1)                                                                                                                                                                                                                  | -                               | -                           | P_trifoliata_00075_mRNA_49.1    |
| GF0044869 | 0                            | 0                        | 1                            | Hypothetical protein (1)                                         | -                                                                                                                                                                                        | -                                                                                                                                                                                                                                                                                 | -                               | -                           | P_trifoliata_00075_mRNA_48.1    |
| GF0044868 | 0                            | 0                        | 1                            | Hypothetical protein (1)                                         | integral component of membrane [GO:0016021 cellular_component] (1); transmembrane transporter activity [GO:0022857 molecular_function] (1)                                               | WAT1-related protein [IPR03184] (1)                                                                                                                                                                                                                                               | -                               | -                           | P_trifoliata_00075_mRNA_46.1    |
| GF0044867 | 0                            | 0                        | 1                            | Hypothetical protein (1)                                         | -                                                                                                                                                                                        | Bifunctional inhibitor/plant lipid transfer protein/seed storage helical domain [IPR016140] (1); Hydrophobic seed protein [IPR027923] (1)                                                                                                                                         | -                               | -                           | P_trifoliata_00075_mRNA_38.1    |
| GF0044866 | 0                            | 0                        | 1                            | Hypothetical protein (1)                                         | -                                                                                                                                                                                        | Hydrophobic seed protein [IPR027923] (1); Bifunctional inhibitor/plant lipid transfer protein/seed storage helical domain [IPR016140] (1)                                                                                                                                         | -                               | -                           | P_trifoliata_00075_mRNA_37.1    |
| GF0044865 | 0                            | 0                        | 1                            | Hypothetical protein (1)                                         | -                                                                                                                                                                                        | -                                                                                                                                                                                                                                                                                 | -                               | -                           | P_trifoliata_00075_mRNA_2.1     |
| GF0044864 | 0                            | 0                        | 1                            | Hypothetical protein (1)                                         | -                                                                                                                                                                                        | -                                                                                                                                                                                                                                                                                 | -                               | -                           | P_trifoliata_00075_mRNA_14.1    |
| GF0044863 | 0                            | 0                        | 1                            | Hypothetical protein (1)                                         | -                                                                                                                                                                                        | -                                                                                                                                                                                                                                                                                 | -                               | -                           | P_trifoliata_00075_mRNA_13.1    |
| GF0044862 | 0                            | 0                        | 1                            | Hypothetical protein (1)                                         | -                                                                                                                                                                                        | -                                                                                                                                                                                                                                                                                 | -                               | -                           | P_trifoliata_00075_mRNA_12.1    |
| GF0044861 | 0                            | 0                        | 1                            | Hypothetical protein (1)                                         | -                                                                                                                                                                                        | -                                                                                                                                                                                                                                                                                 | -                               | -                           | P_trifoliata_00075_mRNA_11.1    |
| GF0044860 | 0                            | 0                        | 1                            | Hypothetical protein (1)                                         | -                                                                                                                                                                                        | -                                                                                                                                                                                                                                                                                 | -                               | -                           | P_trifoliata_00074_mRNA_58.1    |
| GF0044859 | 0                            | 0                        | 1                            | Hypothetical protein (1)                                         | -                                                                                                                                                                                        | -                                                                                                                                                                                                                                                                                 | -                               | -                           | P_trifoliata_00074_mRNA_45.1    |
| GF0044858 | 0                            | 0                        | 1                            | Hypothetical protein (1)                                         | -                                                                                                                                                                                        | -                                                                                                                                                                                                                                                                                 | -                               | -                           | P_trifoliata_00074_mRNA_4.1     |
| GF0044857 | 0                            | 0                        | 1                            | Hypothetical protein (1)                                         | -                                                                                                                                                                                        | Reverse transcriptase domain [IPR000477] (1)                                                                                                                                                                                                                                      | -                               | -                           | P_trifoliata_00074_mRNA_30.1    |
| GF0044856 | 0                            | 0                        | 1                            | Hypothetical protein (1)                                         | -                                                                                                                                                                                        | Cupredoxin [IPR008972] (1)                                                                                                                                                                                                                                                        | -                               | -                           | P_trifoliata_00074_mRNA_28.1    |
| GF0044855 | 0                            | 0                        | 1                            | Hypothetical protein (1)                                         | zinc ion binding [GO:0008270 molecular_function] (1); nucleic acid binding [GO:0003676 molecular_function] (1)                                                                           | Zinc finger, CCHC-type [IPR01878] (1)                                                                                                                                                                                                                                             | -                               | -                           | P_trifoliata_00074_mRNA_2.1     |
| GF0044854 | 0                            | 0                        | 1                            | Hypothetical protein (1)                                         | -                                                                                                                                                                                        | -                                                                                                                                                                                                                                                                                 | -                               | -                           | P_trifoliata_00074_mRNA_18.1    |
| GF0044853 | 0                            | 0                        | 1                            | Hypothetical protein (1)                                         | -                                                                                                                                                                                        | -                                                                                                                                                                                                                                                                                 | -                               | -                           | P_trifoliata_00073_mRNA_92.1    |
| GF0044852 | 0                            | 0                        | 1                            | Putative methyltransferase PMT18 (1)                             | methyltransferase activity [GO:0008168 molecular_function] (1)                                                                                                                           | S-adenosyl-L-methionine-dependent methyltransferase [IPR029063] (1); Putative S-adenosyl-L-methionine-dependent methyltransferase [IPR004159] (1)                                                                                                                                 | -                               | -                           | P_trifoliata_00073_mRNA_90.1    |
| GF0044851 | 0                            | 0                        | 1                            | Hypothetical protein (1)                                         | -                                                                                                                                                                                        | Gag polyprotein of LTR, copia-type [IPR029472] (1)                                                                                                                                                                                                                                | -                               | -                           | P_trifoliata_00073_mRNA_9.1     |
| GF0044850 | 0                            | 0                        | 1                            | ATP binding protein (1)                                          | methyltransferase activity [GO:0008168 molecular_function] (1)                                                                                                                           | S-adenosyl-L-methionine-dependent methyltransferase [IPR029063] (1); Putative S-adenosyl-L-methionine-dependent methyltransferase [IPR004159] (1)                                                                                                                                 | -                               | -                           | P_trifoliata_00073_mRNA_89.1    |
| GF0044849 | 0                            | 0                        | 1                            | Hypothetical protein (1)                                         | -                                                                                                                                                                                        | -                                                                                                                                                                                                                                                                                 | -                               | -                           | P_trifoliata_00073_mRNA_8.1     |
| GF0044848 | 0                            | 0                        | 1                            | Hypothetical protein (1)                                         | -                                                                                                                                                                                        | -                                                                                                                                                                                                                                                                                 | -                               | -                           | P_trifoliata_00073_mRNA_78.1    |
| GF0044847 | 0                            | 0                        | 1                            | Hypothetical protein (1)                                         | -                                                                                                                                                                                        | -                                                                                                                                                                                                                                                                                 | -                               | -                           | P_trifoliata_00073_mRNA_62.1    |
| GF0044846 | 0                            | 0                        | 1                            | LUPF0481 protein (1)                                             | -                                                                                                                                                                                        | Protein of unknown function DUF247, plant [IPR004158] (1)                                                                                                                                                                                                                         | -                               | -                           | P_trifoliata_00073_mRNA_60.1    |
| GF0044845 | 0                            | 0                        | 1                            | Glutamate receptor (1)                                           | -                                                                                                                                                                                        | Periplasmic binding protein-like 1 [IPR028082] (1); Receptor, ligand binding region [IPR001828] (1); Solute-binding protein family 3/N-terminal domain of MIF [IPR001638] (1)                                                                                                     | -                               | -                           | P_trifoliata_00073_mRNA_6.1     |
| GF0044844 | 0                            | 0                        | 1                            | LUPF0481 protein (1)                                             | -                                                                                                                                                                                        | Protein of unknown function DUF247, plant [IPR004158] (1)                                                                                                                                                                                                                         | -                               | -                           | P_trifoliata_00073_mRNA_56.1    |
| GF0044843 | 0                            | 0                        | 1                            | Putative arf domain-containing protein kinase, chloroplastic (1) | protein kinase activity [GO:0004672 molecular_function] (1); protein phosphorylation [GO:0006468 biological_process] (1); ATP binding [GO:0005524 molecular_function] (1)                | Ubl domain [IPR004147] (1); Protein kinase-like domain [IPR011009] (1); Protein kinase domain [IPR000719] (1)                                                                                                                                                                     | -                               | -                           | P_trifoliata_00073_mRNA_49.1    |
| GF0044842 | 0                            | 0                        | 1                            | Hypothetical protein (1)                                         | -                                                                                                                                                                                        | -                                                                                                                                                                                                                                                                                 | -                               | -                           | P_trifoliata_00073_mRNA_43.1    |
| GF0044841 | 0                            | 0                        | 1                            | Hypothetical protein (1)                                         | -                                                                                                                                                                                        | -                                                                                                                                                                                                                                                                                 | -                               | -                           | P_trifoliata_00073_mRNA_41.1    |
| GF0044840 | 0                            | 0                        | 1                            | Glutamate receptor (1)                                           | membrane [GO:0016020 cellular_component] (1); isotropic glutamate receptor activity [GO:0004970 molecular_function] (1)                                                                  | Solute-binding protein family 3/N-terminal domain of MIF [IPR001638] (1); Isotropic glutamate receptor [IPR001320] (1); Receptor, ligand binding region [IPR001828] (1); Periplasmic binding protein-like 1 [IPR028082] (1)                                                       | -                               | -                           | P_trifoliata_00073_mRNA_4.1     |
| GF0044839 | 0                            | 0                        | 1                            | Hypothetical protein (1)                                         | -                                                                                                                                                                                        | -                                                                                                                                                                                                                                                                                 | -                               | -                           | P_trifoliata_00073_mRNA_37.1    |
| GF0044838 | 0                            | 0                        | 1                            | Hypothetical protein (1)                                         | -                                                                                                                                                                                        | -                                                                                                                                                                                                                                                                                 | -                               | -                           | P_trifoliata_00073_mRNA_3.1     |
| GF0044837 | 0                            | 0                        | 1                            | Hypothetical protein (1)                                         | -                                                                                                                                                                                        | Pentatricopeptide repeat [IPR002885] (1)                                                                                                                                                                                                                                          | -                               | -                           | P_trifoliata_00073_mRNA_29.1    |
| GF0044836 | 0                            | 0                        | 1                            | Hypothetical protein (1)                                         | -                                                                                                                                                                                        | -                                                                                                                                                                                                                                                                                 | -                               | -                           | P_trifoliata_00073_mRNA_26.1    |
| GF0044835 | 0                            | 0                        | 1                            | Hypothetical protein (1)                                         | -                                                                                                                                                                                        | -                                                                                                                                                                                                                                                                                 | -                               | -                           | P_trifoliata_00073_mRNA_13.1    |
| GF0044834 | 0                            | 0                        | 1                            | Glutamate receptor (1)                                           | membrane [GO:0016020 cellular_component] (1); isotropic glutamate receptor activity [GO:0004970 molecular_function] (1)                                                                  | Periplasmic binding protein-like 1 [IPR028082] (1); Receptor, ligand binding region [IPR001828] (1); Isotropic glutamate receptor [IPR001320] (1); Solute-binding protein family 3/N-terminal domain of MIF [IPR001638] (1)                                                       | -                               | -                           | P_trifoliata_00073_mRNA_1.1     |
| GF0044833 | 0                            | 0                        | 1                            | Hypothetical protein (1)                                         | -                                                                                                                                                                                        | -                                                                                                                                                                                                                                                                                 | -                               | -                           | P_trifoliata_00072_mRNA_93.1    |
| GF0044832 | 0                            | 0                        | 1                            | Hypothetical protein (1)                                         | -                                                                                                                                                                                        | -                                                                                                                                                                                                                                                                                 | -                               | -                           | P_trifoliata_00072_mRNA_9.1     |
| GF0044831 | 0                            | 0                        | 1                            | Hypothetical protein (1)                                         | -                                                                                                                                                                                        | -                                                                                                                                                                                                                                                                                 | -                               | -                           | P_trifoliata_00072_mRNA_88.1    |
| GF0044830 | 0                            | 0                        | 1                            | Hypothetical protein (1)                                         | -                                                                                                                                                                                        | Protein of unknown function DUF247, plant [IPR004158] (1)                                                                                                                                                                                                                         | -                               | -                           | P_trifoliata_00072_mRNA_84.1    |
| GF0044829 | 0                            | 0                        | 1                            | Hypothetical protein (1)                                         | -                                                                                                                                                                                        | -                                                                                                                                                                                                                                                                                 | -                               | -                           | P_trifoliata_00072_mRNA_8.1     |
| GF0044828 | 0                            | 0                        | 1                            | Hypothetical protein (1)                                         | -                                                                                                                                                                                        | -                                                                                                                                                                                                                                                                                 | -                               | -                           | P_trifoliata_00072_mRNA_74.1    |
| GF0044827 | 0                            | 0                        | 1                            | Hypothetical protein (1)                                         | -                                                                                                                                                                                        | -                                                                                                                                                                                                                                                                                 | -                               | -                           | P_trifoliata_00072_mRNA_73.1    |
| GF0044826 | 0                            | 0                        | 1                            | Hypothetical protein (1)                                         | -                                                                                                                                                                                        | -                                                                                                                                                                                                                                                                                 | -                               | -                           | P_trifoliata_00072_mRNA_72.1    |
| GF0044825 | 0                            | 0                        | 1                            | Hypothetical protein (1)                                         | -                                                                                                                                                                                        | -                                                                                                                                                                                                                                                                                 | -                               | -                           | P_trifoliata_00072_mRNA_71.1    |
| GF0044824 | 0                            | 0                        | 1                            | Hypothetical protein (1)                                         | -                                                                                                                                                                                        | -                                                                                                                                                                                                                                                                                 | -                               | -                           | P_trifoliata_00072_mRNA_70.1    |
| GF0044823 | 0                            | 0                        | 1                            | Hypothetical protein (1)                                         | -                                                                                                                                                                                        | -                                                                                                                                                                                                                                                                                 | -                               | -                           | P_trifoliata_00072_mRNA_69.1    |
| GF0044822 | 0                            | 0                        | 1                            | Hypothetical protein (1)                                         | -                                                                                                                                                                                        | -                                                                                                                                                                                                                                                                                 | -                               | -                           | P_trifoliata_00072_mRNA_64.1    |
| GF0044821 | 0                            | 0                        | 1                            | Hypothetical protein (1)                                         | -                                                                                                                                                                                        | -                                                                                                                                                                                                                                                                                 | -                               | -                           | P_trifoliata_00072_mRNA_51.1    |
| GF0044820 | 0                            | 0                        | 1                            | Putative mDR family transposase-like (1)                         | zinc ion binding [GO:0008270 molecular_function] (1)                                                                                                                                     | Zinc finger, PMZ-type [IPR006564] (1); MULE transposase domain [IPR018209] (1); Zinc finger, SWIM-type [IPR007527] (1)                                                                                                                                                            | -                               | -                           | P_trifoliata_00072_mRNA_49.1    |
| GF0044819 | 0                            | 0                        | 1                            | Hypothetical protein (1)                                         | protein binding [GO:0005515 molecular_function] (1)                                                                                                                                      | Leucine-rich repeat [IPR001611] (1); Leucine-rich repeat domain, L domain-like [IPR032675] (1)                                                                                                                                                                                    | -                               | -                           | P_trifoliata_00072_mRNA_47.1    |
| GF0044818 | 0                            | 0                        | 1                            | Acyl-protein thioesterase 2 (1)                                  | hydrolase activity [GO:0016787 molecular_function] (1)                                                                                                                                   | Alpha/Beta hydrolase fold [IPR029058] (1); Phospholipase/carboxylesterase/thioesterase [IPR003140] (1)                                                                                                                                                                            | -                               | -                           | P_trifoliata_00072_mRNA_27.1    |
| GF0044817 | 0                            | 0                        | 1                            | Hypothetical protein (1)                                         | -                                                                                                                                                                                        | -                                                                                                                                                                                                                                                                                 | -                               | -                           | P_trifoliata_00072_mRNA_15.1    |
| GF0044816 | 0                            | 0                        | 1                            | Disease resistance protein (1)                                   | -                                                                                                                                                                                        | Leucine-rich repeat domain, L domain-like [IPR032675] (1)                                                                                                                                                                                                                         | -                               | -                           | P_trifoliata_00071_mRNA_97.1    |
| GF0044815 | 0                            | 0                        | 1                            | Hypothetical protein (1)                                         | -                                                                                                                                                                                        | -                                                                                                                                                                                                                                                                                 | -                               | -                           | P_trifoliata_00071_mRNA_8.1     |
| GF0044814 | 0                            | 0                        | 1                            | Hypothetical protein (1)                                         | -                                                                                                                                                                                        | Leucine-rich repeat domain, L domain-like [IPR032675] (1)                                                                                                                                                                                                                         | -                               | -                           | P_trifoliata_00071_mRNA_60.1    |
| GF0044813 | 0                            | 0                        | 1                            | Hypothetical protein (1)                                         | -                                                                                                                                                                                        | -                                                                                                                                                                                                                                                                                 | -                               | -                           | P_trifoliata_00071_mRNA_5.1     |
| GF0044812 | 0                            | 0                        | 1                            | Hypothetical protein (1)                                         | thiamine pyrophosphate binding [GO:0030976 molecular_function] (1)                                                                                                                       | Thiamine pyrophosphate binding domain [IPR012001] (1); Thiamine diphosphate-binding fold [IPR020601] (1)                                                                                                                                                                          | -                               | -                           | P_trifoliata_00071_mRNA_48.1    |
| GF0044811 | 0                            | 0                        | 1                            | Lacase (1)                                                       | copper ion binding [GO:0005507 molecular_function] (1); oxidoreductase activity [GO:0016049 molecular_function] (1); oxidation-reduction process [GO:0055134 biological_process] (1)     | Multicopper oxidase, type 1 [IPR001117] (1); Multicopper oxidases, conserved site [IPR031318] (1); Multicopper oxidase, type 2 [IPR011706] (1); Cupredoxin [IPR008972] (1); Multicopper oxidase, type 3 [IPR011707] (1); Multicopper oxidase, copper-binding site [IPR062353] (1) | -                               | -                           | P_trifoliata_00071_mRNA_41.1    |
| GF0044810 | 0                            | 0                        | 1                            | Hypothetical protein (1)                                         | ATP binding [GO:0005524 molecular_function] (1); protein kinase activity [GO:0004672 molecular_function] (1); protein phosphorylation [GO:0006468 biological_process] (1)                | Protein kinase domain [IPR000719] (1); Protein kinase-like domain [IPR011009] (1)                                                                                                                                                                                                 | -                               | -                           | P_trifoliata_00071_mRNA_32.1    |
| GF0044809 | 0                            | 0                        | 1                            | Hypothetical protein (1)                                         | -                                                                                                                                                                                        | -                                                                                                                                                                                                                                                                                 | -                               | -                           | P_trifoliata_00071_mRNA_15.1    |
| GF0044808 | 0                            | 0                        | 1                            | Hypothetical protein (1)                                         | -                                                                                                                                                                                        | -                                                                                                                                                                                                                                                                                 | -                               | -                           | P_trifoliata_00071_mRNA_13.1    |
| GF0044807 | 0                            | 0                        | 1                            | Hypothetical protein (1)                                         | -                                                                                                                                                                                        | -                                                                                                                                                                                                                                                                                 | -                               | -                           | P_trifoliata_00071_mRNA_1.1     |

| ID        | Num. in <i>C. celeratae</i> | Num. in <i>C. canthii</i> | Num. in <i>P. trifoliata</i> | Note                                               | GO                                                                                                                                                                                                                                                                                                                                 | InterPro                                                                                                                                                                                                                                                                                                                                                                                                                                                                           | Members in <i>C. celeratae</i> | Members in <i>C. canthii</i> | Members in <i>P. trifoliata</i> |
|-----------|-----------------------------|---------------------------|------------------------------|----------------------------------------------------|------------------------------------------------------------------------------------------------------------------------------------------------------------------------------------------------------------------------------------------------------------------------------------------------------------------------------------|------------------------------------------------------------------------------------------------------------------------------------------------------------------------------------------------------------------------------------------------------------------------------------------------------------------------------------------------------------------------------------------------------------------------------------------------------------------------------------|--------------------------------|------------------------------|---------------------------------|
| GF0044806 | 0                           | 0                         | 1                            | 1 tRNA pseudouridine synthase A (1)                | RNA modification [GO:0009451 biological_process] (1); pseudouridine synthase activity [GO:0009982 molecular_function] (1); RNA binding [GO:0003723 molecular_function] (1); pseudouridine synthesis [GO:0001522 biological_process] (1)                                                                                            | Pseudouridine synthase 1, TruA, alpha/beta domain [IPR020097] (1); Pseudouridine synthase 1, TruA [IPR001406] (1); Pseudouridine synthase 1, TruA, N-terminal [IPR020094] (1); Pseudouridine synthase, catalytic domain [IPR021013] (1); Pseudouridine synthase 1, TruA, C-terminal [IPR020095] (1)                                                                                                                                                                                | -                              | -                            | P_trifoliata_00070_mRNA_94.1    |
| GF0044805 | 0                           | 0                         | 1                            | 1 Hypothetical protein (1)                         |                                                                                                                                                                                                                                                                                                                                    | ABC transporter extracellular N-terminal domain [IPR029481] (1)                                                                                                                                                                                                                                                                                                                                                                                                                    | -                              | -                            | P_trifoliata_00070_mRNA_78.1    |
| GF0044804 | 0                           | 0                         | 1                            | 1 Hypothetical protein (1)                         |                                                                                                                                                                                                                                                                                                                                    | ABC transporter-like [IPR003439] (1); ABC-2 type transporter [IPR003525] (1); P-loop containing nucleoside triphosphate hydrolase [IPR027417] (1); ABC-transporter extracellular N-terminal domain [IPR029481] (1); Plant PDR molecular_function (1)                                                                                                                                                                                                                               | -                              | -                            | P_trifoliata_00070_mRNA_76.1    |
| GF0044803 | 0                           | 0                         | 1                            | 1 Pleiotropic drug resistance protein 3 (1)        | membrane [GO:0016020 cellular_component] (1); ATPase activity [GO:0016887 molecular_function] (1); ATP binding [GO:0005524 molecular_function] (1)                                                                                                                                                                                 | ABC transporter associated [IPR015581] (1); P-loop containing nucleoside triphosphate hydrolase [IPR027417] (1); Small GTP-binding protein domain [IPR005225] (1); Small GTPase superfamily, Rab type [IPR001579] (1); Small GTPase superfamily, ARF type [IPR006680] (1); DnaJ domain [IPR001623] (1); Cleavage inducing molecular chaperone, Jv [IPR032843] (1)                                                                                                                  | -                              | -                            | P_trifoliata_00070_mRNA_75.1    |
| GF0044802 | 0                           | 0                         | 1                            | 1 ADP-ribosylation factor A1F (1)                  | intracellular [GO:0005622 cellular_component] (1); GTP binding [GO:0005525 molecular_function] (1); small GTPase mediated signal transduction [GO:0007264 biological_process] (1); protein transport [GO:0015031 biological_process] (1)                                                                                           | Small GTP-binding protein domain [IPR005225] (1); Small GTPase superfamily, Rab type [IPR001579] (1); Small GTPase superfamily, ARF type [IPR006680] (1); DnaJ domain [IPR001623] (1); Cleavage inducing molecular chaperone, Jv [IPR032843] (1)                                                                                                                                                                                                                                   | -                              | -                            | P_trifoliata_00070_mRNA_61.1    |
| GF0044801 | 0                           | 0                         | 1                            | 1 Hypothetical protein (1)                         |                                                                                                                                                                                                                                                                                                                                    | RNA recognition motif domain [IPR000504] (1); Cyclophilin-type peptidyl-prolyl cis-trans isomerase [IPR024938] (1); Nucleoside-binding alpha-beta plat domain [IPR012677] (1); Cyclophilin-like domain [IPR029000] (1); Cyclophilin-type peptidyl-prolyl cis-trans isomerase domain [IPR002130] (1)                                                                                                                                                                                | -                              | -                            | P_trifoliata_00070_mRNA_36.2    |
| GF0044800 | 0                           | 0                         | 1                            | 1 Hypothetical protein (1)                         |                                                                                                                                                                                                                                                                                                                                    |                                                                                                                                                                                                                                                                                                                                                                                                                                                                                    | -                              | -                            | P_trifoliata_00070_mRNA_35.1    |
| GF0044799 | 0                           | 0                         | 1                            | 1 Hypothetical protein (1)                         |                                                                                                                                                                                                                                                                                                                                    |                                                                                                                                                                                                                                                                                                                                                                                                                                                                                    | -                              | -                            | P_trifoliata_00070_mRNA_31.1    |
| GF0044798 | 0                           | 0                         | 1                            | 1 Hypothetical protein (1)                         | peptidyl-prolyl cis-trans isomerase activity [GO:0003755 molecular_function] (1); nucleic acid binding [GO:0003676 molecular_function] (1); nucleotide binding [GO:0000166 molecular_function] (1); protein peptidyl-prolyl isomerization [GO:0000413 biological_process] (1); protein folding [GO:0006457 biological_process] (1) |                                                                                                                                                                                                                                                                                                                                                                                                                                                                                    | -                              | -                            | P_trifoliata_00070_mRNA_30.1    |
| GF0044797 | 0                           | 0                         | 1                            | 1 Hypothetical protein (1)                         |                                                                                                                                                                                                                                                                                                                                    |                                                                                                                                                                                                                                                                                                                                                                                                                                                                                    | -                              | -                            | P_trifoliata_00069_mRNA_94.1    |
| GF0044796 | 0                           | 0                         | 1                            | 1 Hypothetical protein (1)                         |                                                                                                                                                                                                                                                                                                                                    |                                                                                                                                                                                                                                                                                                                                                                                                                                                                                    | -                              | -                            | P_trifoliata_00069_mRNA_93.1    |
| GF0044795 | 0                           | 0                         | 1                            | 1 Hypothetical protein (1)                         |                                                                                                                                                                                                                                                                                                                                    |                                                                                                                                                                                                                                                                                                                                                                                                                                                                                    | -                              | -                            | P_trifoliata_00069_mRNA_91.1    |
| GF0044794 | 0                           | 0                         | 1                            | 1 Hypothetical protein (1)                         | metabolic process [GO:0008152 biological_process] (1); transferase activity, transferring hexosyl groups [GO:0016758 molecular_function] (1)                                                                                                                                                                                       | UDP-glucuronosyl/UDP-glucosyltransferase [IPR002213] (1)                                                                                                                                                                                                                                                                                                                                                                                                                           | -                              | -                            | P_trifoliata_00069_mRNA_9.1     |
| GF0044793 | 0                           | 0                         | 1                            | 1 Putative ribonuclease H protein (1)              |                                                                                                                                                                                                                                                                                                                                    | Reverse transcriptase zinc-binding domain [IPR029060] (1); Ribonuclease H-like domain [IPR012337] (1); Domain of unknown function DUF4218 [IPR025452] (1); Reverse transcriptase zinc-binding domain [IPR029060] (1); Endonuclease/exonuclease/phosphatase [IPR005135] (1)                                                                                                                                                                                                         | -                              | -                            | P_trifoliata_00069_mRNA_88.1    |
| GF0044792 | 0                           | 0                         | 1                            | 1 Hypothetical protein (1)                         | nucleic acid binding [GO:0003676 molecular_function] (1)                                                                                                                                                                                                                                                                           |                                                                                                                                                                                                                                                                                                                                                                                                                                                                                    | -                              | -                            | P_trifoliata_00069_mRNA_87.1    |
| GF0044791 | 0                           | 0                         | 1                            | 1 Hypothetical protein (1)                         |                                                                                                                                                                                                                                                                                                                                    |                                                                                                                                                                                                                                                                                                                                                                                                                                                                                    | -                              | -                            | P_trifoliata_00069_mRNA_84.1    |
| GF0044790 | 0                           | 0                         | 1                            | 1 UDP-glucosyltransferase 73B5 (1)                 | transferase activity, transferring hexosyl groups [GO:0016758 molecular_function] (1); metabolic process [GO:0008152 biological_process] (1)                                                                                                                                                                                       | UDP-glucuronosyl/UDP-glucosyltransferase [IPR002213] (1)                                                                                                                                                                                                                                                                                                                                                                                                                           | -                              | -                            | P_trifoliata_00069_mRNA_8.1     |
| GF0044789 | 0                           | 0                         | 1                            | 1 Hypothetical protein (1)                         | nucleic acid binding [GO:0003676 molecular_function] (1)                                                                                                                                                                                                                                                                           | Ribonuclease H-like domain [IPR012337] (1)                                                                                                                                                                                                                                                                                                                                                                                                                                         | -                              | -                            | P_trifoliata_00069_mRNA_78.1    |
| GF0044788 | 0                           | 0                         | 1                            | 1 Hypothetical protein (1)                         |                                                                                                                                                                                                                                                                                                                                    | Probable transposase, Pta/Ea/Spm, plant [IPR004252] (1)                                                                                                                                                                                                                                                                                                                                                                                                                            | -                              | -                            | P_trifoliata_00069_mRNA_77.1    |
| GF0044787 | 0                           | 0                         | 1                            | 1 Hypothetical protein (1)                         |                                                                                                                                                                                                                                                                                                                                    |                                                                                                                                                                                                                                                                                                                                                                                                                                                                                    | -                              | -                            | P_trifoliata_00069_mRNA_76.1    |
| GF0044786 | 0                           | 0                         | 1                            | 1 Hypothetical protein (1)                         | protein dimerization activity [GO:0040983 molecular_function] (1); nucleic acid binding [GO:0003676 molecular_function] (1)                                                                                                                                                                                                        | HAT, C-terminal dimerization domain [IPR008906] (1); Transposase, MuDR, plant [IPR004321] (1); Ribonuclease H-like domain [IPR012337] (1)                                                                                                                                                                                                                                                                                                                                          | -                              | -                            | P_trifoliata_00069_mRNA_73.1    |
| GF0044785 | 0                           | 0                         | 1                            | 1 Hypothetical protein (1)                         |                                                                                                                                                                                                                                                                                                                                    |                                                                                                                                                                                                                                                                                                                                                                                                                                                                                    | -                              | -                            | P_trifoliata_00069_mRNA_68.1    |
| GF0044784 | 0                           | 0                         | 1                            | 1 Hypothetical protein (1)                         |                                                                                                                                                                                                                                                                                                                                    |                                                                                                                                                                                                                                                                                                                                                                                                                                                                                    | -                              | -                            | P_trifoliata_00069_mRNA_66.1    |
| GF0044783 | 0                           | 0                         | 1                            | 1 Hypothetical protein (1)                         |                                                                                                                                                                                                                                                                                                                                    |                                                                                                                                                                                                                                                                                                                                                                                                                                                                                    | -                              | -                            | P_trifoliata_00069_mRNA_65.1    |
| GF0044782 | 0                           | 0                         | 1                            | 1 Pentatricopeptide (PPR) repeat protein (1)       | protein binding [GO:0005515 molecular_function] (1)                                                                                                                                                                                                                                                                                | Pentatricopeptide repeat [IPR002885] (1); Tetratricopeptide-like helical domain [IPR011990] (1)                                                                                                                                                                                                                                                                                                                                                                                    | -                              | -                            | P_trifoliata_00069_mRNA_62.1    |
| GF0044781 | 0                           | 0                         | 1                            | 1 Hypothetical protein (1)                         |                                                                                                                                                                                                                                                                                                                                    |                                                                                                                                                                                                                                                                                                                                                                                                                                                                                    | -                              | -                            | P_trifoliata_00069_mRNA_61.1    |
| GF0044780 | 0                           | 0                         | 1                            | 1 UDP-glucosyltransferase 73C5 (1)                 | metabolic process [GO:0008152 biological_process] (1); transferase activity, transferring hexosyl groups [GO:0016758 molecular_function] (1)                                                                                                                                                                                       | UDP-glucuronosyl/UDP-glucosyltransferase [IPR002213] (1)                                                                                                                                                                                                                                                                                                                                                                                                                           | -                              | -                            | P_trifoliata_00069_mRNA_52.1    |
| GF0044779 | 0                           | 0                         | 1                            | 1 Hypothetical protein (1)                         |                                                                                                                                                                                                                                                                                                                                    |                                                                                                                                                                                                                                                                                                                                                                                                                                                                                    | -                              | -                            | P_trifoliata_00069_mRNA_5.1     |
| GF0044778 | 0                           | 0                         | 1                            | 1 Hypothetical protein (1)                         |                                                                                                                                                                                                                                                                                                                                    | Domain of unknown function DUF4283 [IPR025558] (1)                                                                                                                                                                                                                                                                                                                                                                                                                                 | -                              | -                            | P_trifoliata_00069_mRNA_45.1    |
| GF0044777 | 0                           | 0                         | 1                            | 1 Hypothetical protein (1)                         |                                                                                                                                                                                                                                                                                                                                    |                                                                                                                                                                                                                                                                                                                                                                                                                                                                                    | -                              | -                            | P_trifoliata_00069_mRNA_4.1     |
| GF0044776 | 0                           | 0                         | 1                            | 1 Phosphoglycerate dehydrogenase (1)               | NAD binding [GO:0051287 molecular_function] (1); oxidation-reduction process [GO:005514 biological_process] (1); amino acid binding [GO:0016897 molecular_function] (1); metabolic process [GO:0008152 biological_process] (1)                                                                                                     | D-isomer specific 2-hydroxyacid dehydrogenase, NAD-binding domain [IPR006460] (1); ACT domain [IPR009212] (1); D-isomer specific 2-hydroxyacid dehydrogenase, NAD-binding domain conserved site [IPR029753] (1); NAD(P)-binding domain [IPR016040] (1); Allosteric substrate binding domain [IPR029009] (1); D-isomer specific 2-hydroxyacid dehydrogenase, NAD-binding domain conserved site [IPR029752] (1); S-adenosyl-L-homocysteine lyase, NAD binding domain [IPR015878] (1) | -                              | -                            | P_trifoliata_00069_mRNA_33.1    |
| GF0044775 | 0                           | 0                         | 1                            | 1 Hypothetical protein (1)                         |                                                                                                                                                                                                                                                                                                                                    |                                                                                                                                                                                                                                                                                                                                                                                                                                                                                    | -                              | -                            | P_trifoliata_00069_mRNA_3.1     |
| GF0044774 | 0                           | 0                         | 1                            | 1 Hypothetical protein (1)                         |                                                                                                                                                                                                                                                                                                                                    |                                                                                                                                                                                                                                                                                                                                                                                                                                                                                    | -                              | -                            | P_trifoliata_00069_mRNA_28.1    |
| GF0044773 | 0                           | 0                         | 1                            | 1 Hypothetical protein (1)                         |                                                                                                                                                                                                                                                                                                                                    |                                                                                                                                                                                                                                                                                                                                                                                                                                                                                    | -                              | -                            | P_trifoliata_00069_mRNA_24.1    |
| GF0044772 | 0                           | 0                         | 1                            | 1 Hypothetical protein (1)                         |                                                                                                                                                                                                                                                                                                                                    |                                                                                                                                                                                                                                                                                                                                                                                                                                                                                    | -                              | -                            | P_trifoliata_00069_mRNA_22.1    |
| GF0044771 | 0                           | 0                         | 1                            | 1 Leucine-rich repeat (LRR) family protein (1)     |                                                                                                                                                                                                                                                                                                                                    | Leucine-rich repeat domain, L domain-like [IPR032673] (1)                                                                                                                                                                                                                                                                                                                                                                                                                          | -                              | -                            | P_trifoliata_00069_mRNA_15.1    |
| GF0044770 | 0                           | 0                         | 1                            | 1 Hypothetical protein (1)                         | protein binding [GO:0005515 molecular_function] (1)                                                                                                                                                                                                                                                                                | Kelch-type beta propeller [IPR015915] (1); Pentatricopeptide repeat [IPR002885] (1)                                                                                                                                                                                                                                                                                                                                                                                                | -                              | -                            | P_trifoliata_00069_mRNA_12.1    |
| GF0044769 | 0                           | 0                         | 1                            | 1 Hypothetical protein (1)                         |                                                                                                                                                                                                                                                                                                                                    |                                                                                                                                                                                                                                                                                                                                                                                                                                                                                    | -                              | -                            | P_trifoliata_00069_mRNA_1.1     |
| GF0044768 | 0                           | 0                         | 1                            | 1 Hypothetical protein (1)                         |                                                                                                                                                                                                                                                                                                                                    |                                                                                                                                                                                                                                                                                                                                                                                                                                                                                    | -                              | -                            | P_trifoliata_00068_mRNA_85.1    |
| GF0044767 | 0                           | 0                         | 1                            | 1 Hypothetical protein (1)                         |                                                                                                                                                                                                                                                                                                                                    |                                                                                                                                                                                                                                                                                                                                                                                                                                                                                    | -                              | -                            | P_trifoliata_00068_mRNA_80.1    |
| GF0044766 | 0                           | 0                         | 1                            | 1 Hypothetical protein (1)                         |                                                                                                                                                                                                                                                                                                                                    |                                                                                                                                                                                                                                                                                                                                                                                                                                                                                    | -                              | -                            | P_trifoliata_00068_mRNA_7.1     |
| GF0044765 | 0                           | 0                         | 1                            | 1 Hypothetical protein (1)                         |                                                                                                                                                                                                                                                                                                                                    |                                                                                                                                                                                                                                                                                                                                                                                                                                                                                    | -                              | -                            | P_trifoliata_00068_mRNA_54.1    |
| GF0044764 | 0                           | 0                         | 1                            | 1 Hypothetical protein (1)                         |                                                                                                                                                                                                                                                                                                                                    |                                                                                                                                                                                                                                                                                                                                                                                                                                                                                    | -                              | -                            | P_trifoliata_00068_mRNA_52.1    |
| GF0044763 | 0                           | 0                         | 1                            | 1 Hypothetical protein (1)                         |                                                                                                                                                                                                                                                                                                                                    |                                                                                                                                                                                                                                                                                                                                                                                                                                                                                    | -                              | -                            | P_trifoliata_00068_mRNA_51.1    |
| GF0044762 | 0                           | 0                         | 1                            | 1 Hypothetical protein (1)                         |                                                                                                                                                                                                                                                                                                                                    | Protein of unknown function DUF247, plant [IPR004158] (1)                                                                                                                                                                                                                                                                                                                                                                                                                          | -                              | -                            | P_trifoliata_00068_mRNA_50.1    |
| GF0044761 | 0                           | 0                         | 1                            | 1 Hypothetical protein (1)                         |                                                                                                                                                                                                                                                                                                                                    |                                                                                                                                                                                                                                                                                                                                                                                                                                                                                    | -                              | -                            | P_trifoliata_00068_mRNA_47.1    |
| GF0044760 | 0                           | 0                         | 1                            | 1 Hypothetical protein (1)                         |                                                                                                                                                                                                                                                                                                                                    |                                                                                                                                                                                                                                                                                                                                                                                                                                                                                    | -                              | -                            | P_trifoliata_00068_mRNA_46.1    |
| GF0044759 | 0                           | 0                         | 1                            | 1 Hypothetical protein (1)                         |                                                                                                                                                                                                                                                                                                                                    |                                                                                                                                                                                                                                                                                                                                                                                                                                                                                    | -                              | -                            | P_trifoliata_00068_mRNA_43.1    |
| GF0044758 | 0                           | 0                         | 1                            | 1 Hypothetical protein (1)                         |                                                                                                                                                                                                                                                                                                                                    |                                                                                                                                                                                                                                                                                                                                                                                                                                                                                    | -                              | -                            | P_trifoliata_00068_mRNA_38.1    |
| GF0044757 | 0                           | 0                         | 1                            | 1 Hypothetical protein (1)                         |                                                                                                                                                                                                                                                                                                                                    |                                                                                                                                                                                                                                                                                                                                                                                                                                                                                    | -                              | -                            | P_trifoliata_00068_mRNA_34.1    |
| GF0044756 | 0                           | 0                         | 1                            | 1 Hypothetical protein (1)                         |                                                                                                                                                                                                                                                                                                                                    |                                                                                                                                                                                                                                                                                                                                                                                                                                                                                    | -                              | -                            | P_trifoliata_00068_mRNA_33.1    |
| GF0044755 | 0                           | 0                         | 1                            | 1 Hypothetical protein (1)                         | DNA binding [GO:0003677 molecular_function] (1)                                                                                                                                                                                                                                                                                    | B3 DNA binding domain [IPR000340] (1); DNA-binding pseudobared domain [IPR015300] (1)                                                                                                                                                                                                                                                                                                                                                                                              | -                              | -                            | P_trifoliata_00068_mRNA_32.1    |
| GF0044754 | 0                           | 0                         | 1                            | 1 Hypothetical protein (1)                         |                                                                                                                                                                                                                                                                                                                                    |                                                                                                                                                                                                                                                                                                                                                                                                                                                                                    | -                              | -                            | P_trifoliata_00068_mRNA_25.1    |
| GF0044753 | 0                           | 0                         | 1                            | 1 cDNA clone:002-110-H12, full insert sequence (1) | nucleic acid binding [GO:0003676 molecular_function] (1); protein dimerization activity [GO:0040983 molecular_function] (1)                                                                                                                                                                                                        | HAT, C-terminal dimerization domain [IPR008906] (1); Ribonuclease H-like domain [IPR012337] (1)                                                                                                                                                                                                                                                                                                                                                                                    | -                              | -                            | P_trifoliata_00068_mRNA_22.1    |
| GF0044752 | 0                           | 0                         | 1                            | 1 Hypothetical protein (1)                         |                                                                                                                                                                                                                                                                                                                                    |                                                                                                                                                                                                                                                                                                                                                                                                                                                                                    | -                              | -                            | P_trifoliata_00068_mRNA_21.1    |
| GF0044751 | 0                           | 0                         | 1                            | 1 Hypothetical protein (1)                         |                                                                                                                                                                                                                                                                                                                                    |                                                                                                                                                                                                                                                                                                                                                                                                                                                                                    | -                              | -                            | P_trifoliata_00068_mRNA_16.1    |
| GF0044750 | 0                           | 0                         | 1                            | 1 Ferrous receptor-like kinase (1)                 |                                                                                                                                                                                                                                                                                                                                    | Concanavalin A-like lectin glucanase domain [IPR013201] (1); Malerin-like carbohydrate-binding domain [IPR024788] (1)                                                                                                                                                                                                                                                                                                                                                              | -                              | -                            | P_trifoliata_00068_mRNA_13.1    |
| GF0044749 | 0                           | 0                         | 1                            | 1 Hypothetical protein (1)                         | nucleic acid binding [GO:0003676 molecular_function] (1); zinc ion binding [GO:0008270 molecular_function] (1)                                                                                                                                                                                                                     | Zinc finger, CCHC-type [IPR001878] (1)                                                                                                                                                                                                                                                                                                                                                                                                                                             | -                              | -                            | P_trifoliata_00068_mRNA_12.1    |
| GF0044748 | 0                           | 0                         | 1                            | 1 Hypothetical protein (1)                         |                                                                                                                                                                                                                                                                                                                                    |                                                                                                                                                                                                                                                                                                                                                                                                                                                                                    | -                              | -                            | P_trifoliata_00068_mRNA_11.1    |

| ID        | Num. in <i>C. clementiae</i> | Num. in <i>C. unihii</i> | Num. in <i>P. trifoliata</i> | Note                                                                                          | GO                                                                                                                                                                                                                                                                                                                                                                                            | InterPro                                                                                                                                                                                                                                                                                                                       | Members in <i>C. clementiae</i> | Members in <i>C. unihii</i> | Members in <i>P. trifoliata</i> |
|-----------|------------------------------|--------------------------|------------------------------|-----------------------------------------------------------------------------------------------|-----------------------------------------------------------------------------------------------------------------------------------------------------------------------------------------------------------------------------------------------------------------------------------------------------------------------------------------------------------------------------------------------|--------------------------------------------------------------------------------------------------------------------------------------------------------------------------------------------------------------------------------------------------------------------------------------------------------------------------------|---------------------------------|-----------------------------|---------------------------------|
| GF0044747 | 0                            | 0                        | 1                            | Argininosuccinate synthase (1)                                                                | ATP binding [GO:0005524]<br>molecular_function (1);<br>argininosuccinate synthase activity [GO:0004055 molecular_function] (1);<br>arginine biosynthetic process [GO:0006526 biological_process] (1)                                                                                                                                                                                          | Argininosuccinate synthetase, catalytic/multimerization domain body [IPR034074] (1); Argininosuccinate synthase, conserved site [IPR018223] (1); Rosammon-like alpha beta alpha sandwich fold [IPR014729] (1); P-loop containing nucleoside triphosphate hydrolase [IPR027417] (1); Argininosuccinate synthase [IPR001518] (1) | -                               | -                           | P_trifoliata_00067_mRNA_81.1    |
| GF0044746 | 0                            | 0                        | 1                            | Hypothetical protein (1)                                                                      |                                                                                                                                                                                                                                                                                                                                                                                               |                                                                                                                                                                                                                                                                                                                                |                                 |                             | P_trifoliata_00067_mRNA_6.1     |
| GF0044745 | 0                            | 0                        | 1                            | Hypothetical protein (1)                                                                      | transcription, DNA-templated [GO:0006351 biological_process] (1)                                                                                                                                                                                                                                                                                                                              | Transcription elongation factor S-4L, central domain [IPR003618] (1)                                                                                                                                                                                                                                                           | -                               | -                           | P_trifoliata_00067_mRNA_54.1    |
| GF0044744 | 0                            | 0                        | 1                            | Hypothetical protein (1)                                                                      |                                                                                                                                                                                                                                                                                                                                                                                               |                                                                                                                                                                                                                                                                                                                                |                                 |                             | P_trifoliata_00067_mRNA_53.1    |
| GF0044743 | 0                            | 0                        | 1                            | Hypothetical protein (1)                                                                      |                                                                                                                                                                                                                                                                                                                                                                                               |                                                                                                                                                                                                                                                                                                                                |                                 |                             | P_trifoliata_00067_mRNA_52.1    |
| GF0044742 | 0                            | 0                        | 1                            | Hypothetical protein (1)                                                                      |                                                                                                                                                                                                                                                                                                                                                                                               |                                                                                                                                                                                                                                                                                                                                |                                 |                             | P_trifoliata_00067_mRNA_45.1    |
| GF0044741 | 0                            | 0                        | 1                            | Hypothetical protein (1)                                                                      |                                                                                                                                                                                                                                                                                                                                                                                               |                                                                                                                                                                                                                                                                                                                                |                                 |                             | P_trifoliata_00067_mRNA_38.1    |
| GF0044740 | 0                            | 0                        | 1                            | Bifunctional inhibitor/lipid-transfer protein/seed storage 2S albumin superfamily protein (1) |                                                                                                                                                                                                                                                                                                                                                                                               | Bifunctional inhibitor/plant lipid transfer protein/seed storage helical domain [IPR016140] (1)                                                                                                                                                                                                                                | -                               | -                           | P_trifoliata_00067_mRNA_32.1    |
| GF0044739 | 0                            | 0                        | 1                            | Peptidyl-prolyl cis-trans isomerases isoform 1 (1)                                            | peptidyl-prolyl cis-trans isomerase activity [GO:0003755 molecular_function] (1); protein folding [GO:0006457 biological_process] (1); protein peptidyl-prolyl isomerization [GO:0000413 biological_process] (1)                                                                                                                                                                              | Cyclophilin-like domain [IPR029000] (1); Cyclophilin-type peptidyl-prolyl cis-trans isomerase domain [IPR002130] (1)                                                                                                                                                                                                           | -                               | -                           | P_trifoliata_00067_mRNA_31.1    |
| GF0044738 | 0                            | 0                        | 1                            | Hypothetical protein (1)                                                                      |                                                                                                                                                                                                                                                                                                                                                                                               |                                                                                                                                                                                                                                                                                                                                |                                 |                             | P_trifoliata_00067_mRNA_3.1     |
| GF0044737 | 0                            | 0                        | 1                            | Hypothetical protein (1)                                                                      |                                                                                                                                                                                                                                                                                                                                                                                               |                                                                                                                                                                                                                                                                                                                                |                                 |                             | P_trifoliata_00067_mRNA_28.1    |
| GF0044736 | 0                            | 0                        | 1                            | Hypothetical protein (1)                                                                      |                                                                                                                                                                                                                                                                                                                                                                                               |                                                                                                                                                                                                                                                                                                                                |                                 |                             | P_trifoliata_00067_mRNA_14.1    |
| GF0044735 | 0                            | 0                        | 1                            | Hypothetical protein (1)                                                                      | histone binding [GO:0042393 molecular_function] (1)                                                                                                                                                                                                                                                                                                                                           | PUA-like domain [IPR015947] (1); SRA-YDG [IPR003105] (1)                                                                                                                                                                                                                                                                       | -                               | -                           | P_trifoliata_00067_mRNA_12.1    |
| GF0044734 | 0                            | 0                        | 1                            | Exostosin family protein (1)                                                                  |                                                                                                                                                                                                                                                                                                                                                                                               | Exostosin-like [IPR004263] (1)                                                                                                                                                                                                                                                                                                 | -                               | -                           | P_trifoliata_00067_mRNA_1.1     |
| GF0044733 | 0                            | 0                        | 1                            | Hypothetical protein (1)                                                                      |                                                                                                                                                                                                                                                                                                                                                                                               |                                                                                                                                                                                                                                                                                                                                |                                 |                             | P_trifoliata_00066_mRNA_99.1    |
| GF0044732 | 0                            | 0                        | 1                            | Hypothetical protein (1)                                                                      |                                                                                                                                                                                                                                                                                                                                                                                               |                                                                                                                                                                                                                                                                                                                                |                                 |                             | P_trifoliata_00066_mRNA_93.1    |
| GF0044731 | 0                            | 0                        | 1                            | Hypothetical protein (1)                                                                      |                                                                                                                                                                                                                                                                                                                                                                                               | NAD(P)-binding domain [IPR016040] (1)                                                                                                                                                                                                                                                                                          | -                               | -                           | P_trifoliata_00066_mRNA_91.1    |
| GF0044730 | 0                            | 0                        | 1                            | Hypothetical protein (1)                                                                      |                                                                                                                                                                                                                                                                                                                                                                                               | NAD(P)-binding domain [IPR016040] (1)                                                                                                                                                                                                                                                                                          | -                               | -                           | P_trifoliata_00066_mRNA_89.1    |
| GF0044729 | 0                            | 0                        | 1                            | Hypothetical protein (1)                                                                      |                                                                                                                                                                                                                                                                                                                                                                                               |                                                                                                                                                                                                                                                                                                                                |                                 |                             | P_trifoliata_00066_mRNA_81.1    |
| GF0044728 | 0                            | 0                        | 1                            | Hypothetical protein (1)                                                                      |                                                                                                                                                                                                                                                                                                                                                                                               |                                                                                                                                                                                                                                                                                                                                |                                 |                             | P_trifoliata_00066_mRNA_47.1    |
| GF0044727 | 0                            | 0                        | 1                            | Hypothetical protein (1)                                                                      |                                                                                                                                                                                                                                                                                                                                                                                               |                                                                                                                                                                                                                                                                                                                                |                                 |                             | P_trifoliata_00066_mRNA_4.1     |
| GF0044726 | 0                            | 0                        | 1                            | Hypothetical protein (1)                                                                      | metal ion binding [GO:0046872 molecular_function] (1)                                                                                                                                                                                                                                                                                                                                         | Metallothionein, family 15, plant [IPR000347] (1)                                                                                                                                                                                                                                                                              | -                               | -                           | P_trifoliata_00066_mRNA_29.1    |
| GF0044725 | 0                            | 0                        | 1                            | Putative phosphatase 2C 4-like protein (1)                                                    | protein serine/threonine phosphatase activity [GO:0004722 molecular_function] (1); protein dephosphorylation [GO:0006470 biological_process] (1); catalytic activity [GO:0003524 molecular_function] (1)                                                                                                                                                                                      | PPM-type phosphatase domain [IPR001932] (1); Protein phosphatase 2C family [IPR015655] (1)                                                                                                                                                                                                                                     | -                               | -                           | P_trifoliata_00066_mRNA_26.1    |
| GF0044724 | 0                            | 0                        | 1                            | 17.6 kDa class 1 heat shock protein (1)                                                       |                                                                                                                                                                                                                                                                                                                                                                                               | Small heat shock protein HSP20 [IPR031107] (1); Alpha crystallin/Hsp20 domain [IPR02068] (1); HSP20-like chaperone [IPR008078] (1)                                                                                                                                                                                             | -                               | -                           | P_trifoliata_00066_mRNA_20.1    |
| GF0044723 | 0                            | 0                        | 1                            | SLT1 protein (1)                                                                              |                                                                                                                                                                                                                                                                                                                                                                                               |                                                                                                                                                                                                                                                                                                                                |                                 |                             | P_trifoliata_00066_mRNA_14.1    |
| GF0044722 | 0                            | 0                        | 1                            | Hypothetical protein (1)                                                                      |                                                                                                                                                                                                                                                                                                                                                                                               |                                                                                                                                                                                                                                                                                                                                |                                 |                             | P_trifoliata_00066_mRNA_13.1    |
| GF0044721 | 0                            | 0                        | 1                            | Hypothetical protein (1)                                                                      | DNA binding [GO:0003677 molecular_function] (1); nucleus [GO:0005634 cellular_component] (1); nucleosome assembly [GO:0006334 biological_process] (1); amino acid binding [GO:0016597 molecular_function] (1); protein heterodimerization activity [GO:0046982 molecular_function] (1); metabolic process [GO:0008152 biological_process] (1); nucleosome [GO:0000786 cellular_component] (1) | Histone-fold [IPR009072] (1); Histone H4 [IPR001951] (1); Histone H4, conserved site [IPR019809] (1); ACT domain [IPR002912] (1)                                                                                                                                                                                               | -                               | -                           | P_trifoliata_00066_mRNA_1.1     |
| GF0044720 | 0                            | 0                        | 1                            | Hypothetical protein (1)                                                                      |                                                                                                                                                                                                                                                                                                                                                                                               |                                                                                                                                                                                                                                                                                                                                |                                 |                             | P_trifoliata_00065_mRNA_90.1    |
| GF0044719 | 0                            | 0                        | 1                            | Hypothetical protein (1)                                                                      |                                                                                                                                                                                                                                                                                                                                                                                               | NAD(P)-binding domain [IPR016040] (1)                                                                                                                                                                                                                                                                                          | -                               | -                           | P_trifoliata_00065_mRNA_87.1    |
| GF0044718 | 0                            | 0                        | 1                            | Hypothetical protein (1)                                                                      |                                                                                                                                                                                                                                                                                                                                                                                               |                                                                                                                                                                                                                                                                                                                                |                                 |                             | P_trifoliata_00065_mRNA_86.1    |
| GF0044717 | 0                            | 0                        | 1                            | Hypothetical protein (1)                                                                      |                                                                                                                                                                                                                                                                                                                                                                                               |                                                                                                                                                                                                                                                                                                                                |                                 |                             | P_trifoliata_00065_mRNA_7.1     |
| GF0044716 | 0                            | 0                        | 1                            | Hypothetical protein (1)                                                                      |                                                                                                                                                                                                                                                                                                                                                                                               | Protein of unknown function DUF1191 [IPR010605] (1)                                                                                                                                                                                                                                                                            | -                               | -                           | P_trifoliata_00065_mRNA_62.1    |
| GF0044715 | 0                            | 0                        | 1                            | Hypothetical protein (1)                                                                      |                                                                                                                                                                                                                                                                                                                                                                                               | SCN11 hydrolase-type esterase domain [IPR013830] (1)                                                                                                                                                                                                                                                                           | -                               | -                           | P_trifoliata_00065_mRNA_61.1    |
| GF0044714 | 0                            | 0                        | 1                            | Enhancer of tryptophan and caprice 2 (1)                                                      | DNA binding [GO:0003677 molecular_function] (1)                                                                                                                                                                                                                                                                                                                                               | SANT/Myb domain [IPR001005] (1); Homeodomain-like [IPR009057] (1)                                                                                                                                                                                                                                                              | -                               | -                           | P_trifoliata_00065_mRNA_44.1    |
| GF0044713 | 0                            | 0                        | 1                            | Thylakoid rhodanese-like, putative isoform 1 (1)                                              |                                                                                                                                                                                                                                                                                                                                                                                               | Rhodanese-like domain [IPR001763] (1)                                                                                                                                                                                                                                                                                          | -                               | -                           | P_trifoliata_00065_mRNA_42.1    |
| GF0044712 | 0                            | 0                        | 1                            | Hypothetical protein (1)                                                                      |                                                                                                                                                                                                                                                                                                                                                                                               |                                                                                                                                                                                                                                                                                                                                |                                 |                             | P_trifoliata_00065_mRNA_4.1     |
| GF0044711 | 0                            | 0                        | 1                            | Hypothetical protein (1)                                                                      |                                                                                                                                                                                                                                                                                                                                                                                               |                                                                                                                                                                                                                                                                                                                                |                                 |                             | P_trifoliata_00065_mRNA_23.1    |
| GF0044710 | 0                            | 0                        | 1                            | Hypothetical protein (1)                                                                      |                                                                                                                                                                                                                                                                                                                                                                                               |                                                                                                                                                                                                                                                                                                                                |                                 |                             | P_trifoliata_00065_mRNA_20.1    |
| GF0044709 | 0                            | 0                        | 1                            | Hypothetical protein (1)                                                                      |                                                                                                                                                                                                                                                                                                                                                                                               |                                                                                                                                                                                                                                                                                                                                |                                 |                             | P_trifoliata_00065_mRNA_11.1    |
| GF0044708 | 0                            | 0                        | 1                            | Hypothetical protein (1)                                                                      |                                                                                                                                                                                                                                                                                                                                                                                               |                                                                                                                                                                                                                                                                                                                                |                                 |                             | P_trifoliata_00064_mRNA_99.1    |
| GF0044707 | 0                            | 0                        | 1                            | Hypothetical protein (1)                                                                      |                                                                                                                                                                                                                                                                                                                                                                                               |                                                                                                                                                                                                                                                                                                                                |                                 |                             | P_trifoliata_00064_mRNA_93.1    |
| GF0044706 | 0                            | 0                        | 1                            | Hypothetical protein (1)                                                                      |                                                                                                                                                                                                                                                                                                                                                                                               |                                                                                                                                                                                                                                                                                                                                |                                 |                             | P_trifoliata_00064_mRNA_91.1    |
| GF0044705 | 0                            | 0                        | 1                            | 4-hydroxy-3-methylbut-2-enyl diphosphate reductase (1)                                        | dimethylallyl diphosphate biosynthetic process [GO:0050992 biological_process] (1); metal ion binding [GO:0046872 molecular_function] (1); isopentenyl diphosphate biosynthetic process, methylerythritol 4-phosphate pathway [GO:0019288 biological_process] (1); 4-hydroxy-3-methylbut-2-en-1-yl diphosphate reductase activity [GO:0051745 molecular_function] (1)                         | 4-hydroxy-3-methylbut-2-enyl diphosphate reductase [IPR003451] (1)                                                                                                                                                                                                                                                             | -                               | -                           | P_trifoliata_00064_mRNA_79.1    |
| GF0044704 | 0                            | 0                        | 1                            | Hypothetical protein (1)                                                                      |                                                                                                                                                                                                                                                                                                                                                                                               |                                                                                                                                                                                                                                                                                                                                |                                 |                             | P_trifoliata_00064_mRNA_78.1    |
| GF0044703 | 0                            | 0                        | 1                            | Hypothetical protein (1)                                                                      |                                                                                                                                                                                                                                                                                                                                                                                               |                                                                                                                                                                                                                                                                                                                                |                                 |                             | P_trifoliata_00064_mRNA_77.1    |
| GF0044702 | 0                            | 0                        | 1                            | Hypothetical protein (1)                                                                      |                                                                                                                                                                                                                                                                                                                                                                                               |                                                                                                                                                                                                                                                                                                                                |                                 |                             | P_trifoliata_00064_mRNA_76.1    |
| GF0044701 | 0                            | 0                        | 1                            | Hypothetical protein (1)                                                                      |                                                                                                                                                                                                                                                                                                                                                                                               |                                                                                                                                                                                                                                                                                                                                |                                 |                             | P_trifoliata_00064_mRNA_75.1    |
| GF0044700 | 0                            | 0                        | 1                            | 4-hydroxy-3-methylbut-2-enyl diphosphate reductase (1)                                        | dimethylallyl diphosphate biosynthetic process [GO:0050992 biological_process] (1); 4-hydroxy-3-methylbut-2-en-1-yl diphosphate reductase activity [GO:0051745 molecular_function] (1); isopentenyl diphosphate biosynthetic process, methylerythritol 4-phosphate pathway [GO:0019288 biological_process] (1); metal ion binding [GO:0046872 molecular_function] (1)                         | 4-hydroxy-3-methylbut-2-enyl diphosphate reductase [IPR003451] (1)                                                                                                                                                                                                                                                             | -                               | -                           | P_trifoliata_00064_mRNA_73.1    |
| GF0044699 | 0                            | 0                        | 1                            | Hypothetical protein (1)                                                                      |                                                                                                                                                                                                                                                                                                                                                                                               |                                                                                                                                                                                                                                                                                                                                |                                 |                             | P_trifoliata_00064_mRNA_72.1    |
| GF0044698 | 0                            | 0                        | 1                            | Hypothetical protein (1)                                                                      |                                                                                                                                                                                                                                                                                                                                                                                               |                                                                                                                                                                                                                                                                                                                                |                                 |                             | P_trifoliata_00064_mRNA_71.1    |
| GF0044697 | 0                            | 0                        | 1                            | 4-hydroxy-3-methylbut-2-enyl diphosphate reductase (1)                                        | dimethylallyl diphosphate biosynthetic process [GO:0050992 biological_process] (1); metal ion binding [GO:0046872 molecular_function] (1); isopentenyl diphosphate biosynthetic process, methylerythritol 4-phosphate pathway [GO:0019288 biological_process] (1); 4-hydroxy-3-methylbut-2-en-1-yl diphosphate reductase activity [GO:0051745 molecular_function] (1)                         | 4-hydroxy-3-methylbut-2-enyl diphosphate reductase [IPR003451] (1)                                                                                                                                                                                                                                                             | -                               | -                           | P_trifoliata_00064_mRNA_70.1    |
| GF0044696 | 0                            | 0                        | 1                            | Hypothetical protein (1)                                                                      |                                                                                                                                                                                                                                                                                                                                                                                               |                                                                                                                                                                                                                                                                                                                                |                                 |                             | P_trifoliata_00064_mRNA_7.1     |
| GF0044695 | 0                            | 0                        | 1                            | Hypothetical protein (1)                                                                      |                                                                                                                                                                                                                                                                                                                                                                                               |                                                                                                                                                                                                                                                                                                                                |                                 |                             | P_trifoliata_00064_mRNA_64.1    |
| GF0044694 | 0                            | 0                        | 1                            | Hypothetical protein (1)                                                                      |                                                                                                                                                                                                                                                                                                                                                                                               |                                                                                                                                                                                                                                                                                                                                |                                 |                             | P_trifoliata_00064_mRNA_60.1    |
| GF0044693 | 0                            | 0                        | 1                            | Hypothetical protein (1)                                                                      |                                                                                                                                                                                                                                                                                                                                                                                               | TB2/DP1/HVA22-related protein [IPR004345] (1)                                                                                                                                                                                                                                                                                  | -                               | -                           | P_trifoliata_00064_mRNA_53.1    |
| GF0044692 | 0                            | 0                        | 1                            | Phosphate transporter (1)                                                                     | transmembrane transport [GO:005085 biological_process] (1); integral component of membrane [GO:0016021 cellular_component] (1); transmembrane transporter activity [GO:0022857 molecular_function] (1)                                                                                                                                                                                        | Major facilitator, sugar transporter-like [IPR005828] (1); Major facilitator superfamily domain [IPR020846] (1)                                                                                                                                                                                                                | -                               | -                           | P_trifoliata_00064_mRNA_46.1    |
| GF0044691 | 0                            | 0                        | 1                            | Hypothetical protein (1)                                                                      |                                                                                                                                                                                                                                                                                                                                                                                               |                                                                                                                                                                                                                                                                                                                                |                                 |                             | P_trifoliata_00064_mRNA_41.1    |
| GF0044690 | 0                            | 0                        | 1                            | Hypothetical protein (1)                                                                      |                                                                                                                                                                                                                                                                                                                                                                                               | Retrotroposon gag domain [IPR005162] (1)                                                                                                                                                                                                                                                                                       | -                               | -                           | P_trifoliata_00064_mRNA_37.1    |
| GF0044689 | 0                            | 0                        | 1                            | Hypothetical protein (1)                                                                      |                                                                                                                                                                                                                                                                                                                                                                                               | Arabidopsis retrotroposon Orf1 [IPR004312] (1)                                                                                                                                                                                                                                                                                 | -                               | -                           | P_trifoliata_00064_mRNA_32.1    |
| GF0044688 | 0                            | 0                        | 1                            | BURP domain-containing protein (1)                                                            |                                                                                                                                                                                                                                                                                                                                                                                               | BURP domain [IPR004873] (1)                                                                                                                                                                                                                                                                                                    | -                               | -                           | P_trifoliata_00064_mRNA_31.1    |
| GF0044687 | 0                            | 0                        | 1                            | Hypothetical protein (1)                                                                      | nucleic acid binding [GO:0003676 molecular_function] (1)                                                                                                                                                                                                                                                                                                                                      | Ribonuclease H-like domain [IPR012337] (1)                                                                                                                                                                                                                                                                                     | -                               | -                           | P_trifoliata_00064_mRNA_3.1     |
| GF0044686 | 0                            | 0                        | 1                            | Hypothetical protein (1)                                                                      |                                                                                                                                                                                                                                                                                                                                                                                               |                                                                                                                                                                                                                                                                                                                                |                                 |                             | P_trifoliata_00064_mRNA_28.1    |
| GF0044685 | 0                            | 0                        | 1                            | Hypothetical protein (1)                                                                      |                                                                                                                                                                                                                                                                                                                                                                                               |                                                                                                                                                                                                                                                                                                                                |                                 |                             | P_trifoliata_00064_mRNA_25.1    |

| ID        | Num. in <i>C. clementiae</i> | Num. in <i>C. canthii</i> | Num. in <i>P. trifoliata</i> | Note                                                                   | GO                                                                                                                                                                                                                                                                                                                  | InterPro                                                                                                                                                                                                                                                                                                                                                                                                                                      | Members in <i>C. clementiae</i> | Members in <i>C. canthii</i> | Members in <i>P. trifoliata</i> |
|-----------|------------------------------|---------------------------|------------------------------|------------------------------------------------------------------------|---------------------------------------------------------------------------------------------------------------------------------------------------------------------------------------------------------------------------------------------------------------------------------------------------------------------|-----------------------------------------------------------------------------------------------------------------------------------------------------------------------------------------------------------------------------------------------------------------------------------------------------------------------------------------------------------------------------------------------------------------------------------------------|---------------------------------|------------------------------|---------------------------------|
| GF0044684 | 0                            | 0                         | 1                            | Hypothetical protein (1)                                               |                                                                                                                                                                                                                                                                                                                     | MybSANT-like domain [IPR024752] (1); P-loop ATPase, transmembrane domain [IPR023298] (1)                                                                                                                                                                                                                                                                                                                                                      | -                               | -                            | P_trifoliata_00064_mRNA_103.1   |
| GF0044683 | 0                            | 0                         | 1                            | Hypothetical protein (1)                                               |                                                                                                                                                                                                                                                                                                                     | ATPase, AAA-type, conserved site [IPR03960] (1); AAA-ATPase domain [IPR03959] (1); ATPase, AAA-type core [IPR03959] (1); P-loop containing nucleoside triphosphate hydrolase [IPR027417] (1)                                                                                                                                                                                                                                                  | -                               | -                            | P_trifoliata_00064_mRNA_100.1   |
| GF0044682 | 0                            | 0                         | 1                            | Hypothetical protein (1)                                               | ATP binding [GO:0005524 molecular_function] (1)                                                                                                                                                                                                                                                                     | ATPase, AAA-type, conserved site [IPR03960] (1); AAA-ATPase domain [IPR03959] (1); ATPase, AAA-type core [IPR03959] (1); P-loop containing nucleoside triphosphate hydrolase [IPR027417] (1)                                                                                                                                                                                                                                                  | -                               | -                            | P_trifoliata_00063_mRNA_93.1    |
| GF0044681 | 0                            | 0                         | 1                            | Hypothetical protein (1)                                               | ATP binding [GO:0005524 molecular_function] (1)                                                                                                                                                                                                                                                                     | ATPase, AAA-type, conserved site [IPR03960] (1); AAA-ATPase domain [IPR03959] (1); ATPase, AAA-type core [IPR03959] (1)                                                                                                                                                                                                                                                                                                                       | -                               | -                            | P_trifoliata_00063_mRNA_92.1    |
| GF0044680 | 0                            | 0                         | 1                            | Hypothetical protein (1)                                               |                                                                                                                                                                                                                                                                                                                     | Retrosynposon gag domain [IPR005162] (1)                                                                                                                                                                                                                                                                                                                                                                                                      | -                               | -                            | P_trifoliata_00063_mRNA_77.1    |
| GF0044679 | 0                            | 0                         | 1                            | Hypothetical protein (1)                                               |                                                                                                                                                                                                                                                                                                                     | Retrosynposon gag domain [IPR005162] (1)                                                                                                                                                                                                                                                                                                                                                                                                      | -                               | -                            | P_trifoliata_00063_mRNA_75.1    |
| GF0044678 | 0                            | 0                         | 1                            | Hypothetical protein (1)                                               |                                                                                                                                                                                                                                                                                                                     | Retrosynposon gag domain [IPR005162] (1)                                                                                                                                                                                                                                                                                                                                                                                                      | -                               | -                            | P_trifoliata_00063_mRNA_74.1    |
| GF0044677 | 0                            | 0                         | 1                            | Hypothetical protein (1)                                               |                                                                                                                                                                                                                                                                                                                     | Retrosynposon gag domain [IPR005162] (1)                                                                                                                                                                                                                                                                                                                                                                                                      | -                               | -                            | P_trifoliata_00063_mRNA_48.1    |
| GF0044676 | 0                            | 0                         | 1                            | Hypothetical protein (1)                                               | zinc ion binding [GO:0008270 molecular_function] (1)                                                                                                                                                                                                                                                                | Zinc finger, GRF-type [IPR010666] (1)                                                                                                                                                                                                                                                                                                                                                                                                         | -                               | -                            | P_trifoliata_00063_mRNA_45.1    |
| GF0044675 | 0                            | 0                         | 1                            | Hypothetical protein (1)                                               |                                                                                                                                                                                                                                                                                                                     | Retrosynposon gag domain [IPR005162] (1)                                                                                                                                                                                                                                                                                                                                                                                                      | -                               | -                            | P_trifoliata_00063_mRNA_42.1    |
| GF0044674 | 0                            | 0                         | 1                            | Hypothetical protein (1)                                               | strictosidine synthase activity [GO:0016844 molecular_function] (1); biosynthetic process [GO:0009058 biological_process] (1)                                                                                                                                                                                       | Stis-bladed beta-propeller, TolB-like [IPR011042] (1); Strictosidine synthase [IPR004141] (1)                                                                                                                                                                                                                                                                                                                                                 | -                               | -                            | P_trifoliata_00063_mRNA_4.1     |
| GF0044673 | 0                            | 0                         | 1                            | Hypothetical protein (1)                                               | transferase activity, transferring hexosyl groups [GO:0016758 molecular_function] (1); metabolic process [GO:0008152 biological_process] (1)                                                                                                                                                                        | UDP-glucuronoylUDP-glucosyltransferase [IPR002213] (1)                                                                                                                                                                                                                                                                                                                                                                                        | -                               | -                            | P_trifoliata_00063_mRNA_32.1    |
| GF0044672 | 0                            | 0                         | 1                            | Hypothetical protein (1)                                               | oxidoreductase activity, acting on NADPH [GO:0016651 molecular_function] (1); electron transport chain [GO:0022900 biological_process] (1)                                                                                                                                                                          | NADH dehydrogenase oblongation Fe-S protein 4, mitochondrial [IPR006883] (1)                                                                                                                                                                                                                                                                                                                                                                  | -                               | -                            | P_trifoliata_00063_mRNA_3.1     |
| GF0044671 | 0                            | 0                         | 1                            | Hypothetical protein (1)                                               |                                                                                                                                                                                                                                                                                                                     |                                                                                                                                                                                                                                                                                                                                                                                                                                               | -                               | -                            | P_trifoliata_00063_mRNA_25.1    |
| GF0044670 | 0                            | 0                         | 1                            | Hypothetical protein (1)                                               |                                                                                                                                                                                                                                                                                                                     |                                                                                                                                                                                                                                                                                                                                                                                                                                               | -                               | -                            | P_trifoliata_00063_mRNA_22.1    |
| GF0044669 | 0                            | 0                         | 1                            | Hypothetical protein (1)                                               |                                                                                                                                                                                                                                                                                                                     |                                                                                                                                                                                                                                                                                                                                                                                                                                               | -                               | -                            | P_trifoliata_00063_mRNA_21.1    |
| GF0044668 | 0                            | 0                         | 1                            | Monosaccharide transport protein (1)                                   |                                                                                                                                                                                                                                                                                                                     |                                                                                                                                                                                                                                                                                                                                                                                                                                               | -                               | -                            | P_trifoliata_00063_mRNA_20.1    |
| GF0044667 | 0                            | 0                         | 1                            | Hypothetical protein (1)                                               |                                                                                                                                                                                                                                                                                                                     |                                                                                                                                                                                                                                                                                                                                                                                                                                               | -                               | -                            | P_trifoliata_00063_mRNA_15.1    |
| GF0044666 | 0                            | 0                         | 1                            | Hypothetical protein (1)                                               | protein binding [GO:0005515 molecular_function] (1)                                                                                                                                                                                                                                                                 | CCT domain [IPR010402] (1)                                                                                                                                                                                                                                                                                                                                                                                                                    | -                               | -                            | P_trifoliata_00063_mRNA_11.1    |
| GF0044665 | 0                            | 0                         | 1                            | Hypothetical protein (1)                                               |                                                                                                                                                                                                                                                                                                                     |                                                                                                                                                                                                                                                                                                                                                                                                                                               | -                               | -                            | P_trifoliata_00062_mRNA_9.1     |
| GF0044664 | 0                            | 0                         | 1                            | Hypothetical protein (1)                                               |                                                                                                                                                                                                                                                                                                                     |                                                                                                                                                                                                                                                                                                                                                                                                                                               | -                               | -                            | P_trifoliata_00062_mRNA_86.1    |
| GF0044663 | 0                            | 0                         | 1                            | Putative non-LTR retroelement reverse transcriptase (4)                | RNA-DNA hybrid ribonuclease activity [GO:0004523 molecular_function] (1); nucleic acid binding [GO:0003676 molecular_function] (1)                                                                                                                                                                                  | Ribonuclease H domain [IPR002156] (1); Ribonuclease H-like domain [IPR012337] (1)                                                                                                                                                                                                                                                                                                                                                             | -                               | -                            | P_trifoliata_00062_mRNA_83.1    |
| GF0044662 | 0                            | 0                         | 1                            | Probably inactive leucine-rich repeat receptor-like protein kinase (1) | protein binding [GO:0005515 molecular_function] (1)                                                                                                                                                                                                                                                                 | Leucine-rich repeat-containing N-terminal, plant-type [IPR013210] (1); Leucine-rich repeat [IPR014611] (1); Leucine-rich repeat domain, L domain-like [IPR032675] (1)                                                                                                                                                                                                                                                                         | -                               | -                            | P_trifoliata_00062_mRNA_82.1    |
| GF0044661 | 0                            | 0                         | 1                            | Hypothetical protein (1)                                               |                                                                                                                                                                                                                                                                                                                     |                                                                                                                                                                                                                                                                                                                                                                                                                                               | -                               | -                            | P_trifoliata_00062_mRNA_74.1    |
| GF0044660 | 0                            | 0                         | 1                            | Hypothetical protein (1)                                               |                                                                                                                                                                                                                                                                                                                     |                                                                                                                                                                                                                                                                                                                                                                                                                                               | -                               | -                            | P_trifoliata_00062_mRNA_73.1    |
| GF0044659 | 0                            | 0                         | 1                            | Hypothetical protein (1)                                               |                                                                                                                                                                                                                                                                                                                     | Leucine-rich repeat domain, L domain-like [IPR032675] (1); Protein kinase-like domain [IPR011009] (1); Leucine-rich repeat-containing N-terminal, plant-type [IPR013210] (1)                                                                                                                                                                                                                                                                  | -                               | -                            | P_trifoliata_00062_mRNA_69.1    |
| GF0044658 | 0                            | 0                         | 1                            | Hypothetical protein (1)                                               |                                                                                                                                                                                                                                                                                                                     |                                                                                                                                                                                                                                                                                                                                                                                                                                               | -                               | -                            | P_trifoliata_00062_mRNA_65.1    |
| GF0044657 | 0                            | 0                         | 1                            | Hypothetical protein (1)                                               |                                                                                                                                                                                                                                                                                                                     |                                                                                                                                                                                                                                                                                                                                                                                                                                               | -                               | -                            | P_trifoliata_00062_mRNA_61.1    |
| GF0044656 | 0                            | 0                         | 1                            | Dicer-like protein isoform 6 (1)                                       | endonuclease activity, producing 5'-phosphonucleotides [GO:0016891 molecular_function] (1); protein binding [GO:0005515 molecular_function] (1); ribonuclease III activity [GO:0004525 molecular_function] (1); RNA processing [GO:0006396 biological_process] (1); RNA binding [GO:0003723 molecular_function] (1) | PAZ domain [IPR003100] (1); Helicase, C-terminal [IPR001650] (1); Double-stranded RNA-binding domain [IPR014720] (1); Dicer dimerisation domain [IPR005343] (1); P-loop containing nucleoside triphosphate hydrolase [IPR027417] (1); Ribonuclease III domain [IPR000999] (1)                                                                                                                                                                 | -                               | -                            | P_trifoliata_00062_mRNA_6.1     |
| GF0044655 | 0                            | 0                         | 1                            | Putative mDR family transposase-like (1)                               | zinc ion binding [GO:0008270 molecular_function] (1)                                                                                                                                                                                                                                                                | Zinc finger, SWIM-type [IPR007527] (1); MLE transposase domain [IPR018289] (1); Zinc finger, PMZ-type [IPR006564] (1)                                                                                                                                                                                                                                                                                                                         | -                               | -                            | P_trifoliata_00062_mRNA_57.1    |
| GF0044654 | 0                            | 0                         | 1                            | Hypothetical protein (1)                                               |                                                                                                                                                                                                                                                                                                                     | Retrosynposon gag domain [IPR005162] (1)                                                                                                                                                                                                                                                                                                                                                                                                      | -                               | -                            | P_trifoliata_00062_mRNA_54.1    |
| GF0044653 | 0                            | 0                         | 1                            | Polynucleotidyl transferase, Ribonuclease H fold (1)                   |                                                                                                                                                                                                                                                                                                                     | Reverse transcriptase zinc-binding domain [IPR026960] (1)                                                                                                                                                                                                                                                                                                                                                                                     | -                               | -                            | P_trifoliata_00062_mRNA_32.1    |
| GF0044652 | 0                            | 0                         | 1                            | Hypothetical protein (1)                                               |                                                                                                                                                                                                                                                                                                                     |                                                                                                                                                                                                                                                                                                                                                                                                                                               | -                               | -                            | P_trifoliata_00062_mRNA_19.1    |
| GF0044651 | 0                            | 0                         | 1                            | LRR receptor-like serine/threonine-protein kinase EFR (1)              | protein kinase activity [GO:0004672 biological_process] (1); protein phosphorylation [GO:0006468 biological_process] (1)                                                                                                                                                                                            | Protein kinase-like domain [IPR011009] (1); Leucine-rich repeat domain, L domain-like [IPR032675] (1); Leucine-rich repeat-containing N-terminal, plant-type [IPR013210] (1); Serine/threonine/tyrosine-protein kinase catalytic domain [IPR001245] (1)                                                                                                                                                                                       | -                               | -                            | P_trifoliata_00062_mRNA_18.1    |
| GF0044650 | 0                            | 0                         | 1                            | Hypothetical protein (1)                                               |                                                                                                                                                                                                                                                                                                                     |                                                                                                                                                                                                                                                                                                                                                                                                                                               | -                               | -                            | P_trifoliata_00062_mRNA_12.1    |
| GF0044649 | 0                            | 0                         | 1                            | Hypothetical protein (1)                                               |                                                                                                                                                                                                                                                                                                                     |                                                                                                                                                                                                                                                                                                                                                                                                                                               | -                               | -                            | P_trifoliata_00062_mRNA_11.1    |
| GF0044648 | 0                            | 0                         | 1                            | Hypothetical protein (1)                                               |                                                                                                                                                                                                                                                                                                                     |                                                                                                                                                                                                                                                                                                                                                                                                                                               | -                               | -                            | P_trifoliata_00062_mRNA_10.1    |
| GF0044647 | 0                            | 0                         | 1                            | Hypothetical protein (1)                                               |                                                                                                                                                                                                                                                                                                                     |                                                                                                                                                                                                                                                                                                                                                                                                                                               | -                               | -                            | P_trifoliata_00061_mRNA_69.1    |
| GF0044646 | 0                            | 0                         | 1                            | Hypothetical protein (1)                                               | hydrolase activity, hydrolyzing O-glycosyl compounds [GO:0004553 molecular_function] (1); carbohydrate metabolic process [GO:0005975 biological_process] (1)                                                                                                                                                        | Glycoside hydrolase, catalytic domain [IPR013781] (1); Glycoside hydrolase family 17 [IPR004090] (1); Glycoside hydrolase superfamily [IPR017853] (1)                                                                                                                                                                                                                                                                                         | -                               | -                            | P_trifoliata_00061_mRNA_68.1    |
| GF0044645 | 0                            | 0                         | 1                            | Hypothetical protein (1)                                               |                                                                                                                                                                                                                                                                                                                     |                                                                                                                                                                                                                                                                                                                                                                                                                                               | -                               | -                            | P_trifoliata_00061_mRNA_66.1    |
| GF0044644 | 0                            | 0                         | 1                            | Hypothetical protein (1)                                               |                                                                                                                                                                                                                                                                                                                     | Leucine-rich repeat domain, L domain-like [IPR032675] (1)                                                                                                                                                                                                                                                                                                                                                                                     | -                               | -                            | P_trifoliata_00061_mRNA_57.1    |
| GF0044643 | 0                            | 0                         | 1                            | Hypothetical protein (1)                                               | ATP binding [GO:0005524 molecular_function] (1); protein phosphorylation [GO:0006468 biological_process] (1); protein kinase activity [GO:0004672 molecular_function] (1)                                                                                                                                           | Serine/threonine-protein kinase, active site [IPR008271] (1); Protein kinase-like domain [IPR011009] (1); Protein kinase domain [IPR000719] (1)                                                                                                                                                                                                                                                                                               | -                               | -                            | P_trifoliata_00061_mRNA_46.1    |
| GF0044642 | 0                            | 0                         | 1                            | Hypothetical protein (1)                                               |                                                                                                                                                                                                                                                                                                                     |                                                                                                                                                                                                                                                                                                                                                                                                                                               | -                               | -                            | P_trifoliata_00061_mRNA_45.1    |
| GF0044641 | 0                            | 0                         | 1                            | Hypothetical protein (1)                                               |                                                                                                                                                                                                                                                                                                                     | Leucine-rich repeat [IPR001611] (1); Serine/threonine-protein kinase, active site [IPR008271] (1); Serine/threonine-specific protein kinase, catalytic domain [IPR00290] (1); Leucine-rich repeat domain, L domain-like [IPR032675] (1); Protein kinase-like domain [IPR011009] (1); Leucine-rich repeat, typical subtype [IPR003591] (1); Concanavalin A-like lectin/glucanase domain [IPR013320] (1); Protein kinase domain [IPR000719] (1) | -                               | -                            | P_trifoliata_00061_mRNA_44.1    |
| GF0044640 | 0                            | 0                         | 1                            | Leucine-rich repeat protein kinase family protein, putative (1)        | protein phosphorylation [GO:0006468 biological_process] (1); protein kinase activity [GO:0004672 molecular_function] (1); ATP binding [GO:0005524 molecular_function] (1); protein binding [GO:0005515 molecular_function] (1)                                                                                      | Serine/threonine-specific protein kinase, catalytic domain [IPR00290] (1); Leucine-rich repeat domain, L domain-like [IPR032675] (1); Protein kinase-like domain [IPR011009] (1); Leucine-rich repeat, typical subtype [IPR003591] (1); Concanavalin A-like lectin/glucanase domain [IPR013320] (1); Protein kinase domain [IPR000719] (1)                                                                                                    | -                               | -                            | P_trifoliata_00061_mRNA_43.1    |
| GF0044639 | 0                            | 0                         | 1                            | Hypothetical protein (1)                                               | protein phosphorylation [GO:0006468 biological_process] (1); protein kinase activity [GO:0004672 molecular_function] (1)                                                                                                                                                                                            | Serine/threonine/tyrosine-protein kinase catalytic domain [IPR001245] (1); Protein kinase-like domain [IPR011009] (1)                                                                                                                                                                                                                                                                                                                         | -                               | -                            | P_trifoliata_00061_mRNA_4.1     |
| GF0044638 | 0                            | 0                         | 1                            | Hypothetical protein (1)                                               | transport [GO:0006810 biological_process] (1); intracellular [GO:0005622 cellular_component] (1)                                                                                                                                                                                                                    | Nuclear transport factor 2 [IPR02075] (1); Nuclear transport factor 2, eukaryote [IPR018322] (1); NTF2-like domain [IPR032710] (1)                                                                                                                                                                                                                                                                                                            | -                               | -                            | P_trifoliata_00061_mRNA_37.1    |
| GF0044637 | 0                            | 0                         | 1                            | Hypothetical protein (1)                                               |                                                                                                                                                                                                                                                                                                                     |                                                                                                                                                                                                                                                                                                                                                                                                                                               | -                               | -                            | P_trifoliata_00061_mRNA_31.1    |
| GF0044636 | 0                            | 0                         | 1                            | Hypothetical protein (1)                                               |                                                                                                                                                                                                                                                                                                                     |                                                                                                                                                                                                                                                                                                                                                                                                                                               | -                               | -                            | P_trifoliata_00061_mRNA_30.1    |
| GF0044635 | 0                            | 0                         | 1                            | Hypothetical protein (1)                                               | ADP binding [GO:0043531 molecular_function] (1)                                                                                                                                                                                                                                                                     | NB-ABC [IPR021021] (1); P-loop containing nucleoside triphosphate hydrolase [IPR027417] (1)                                                                                                                                                                                                                                                                                                                                                   | -                               | -                            | P_trifoliata_00061_mRNA_3.1     |
| GF0044634 | 0                            | 0                         | 1                            | Hypothetical protein (1)                                               |                                                                                                                                                                                                                                                                                                                     |                                                                                                                                                                                                                                                                                                                                                                                                                                               | -                               | -                            | P_trifoliata_00061_mRNA_27.1    |
| GF0044633 | 0                            | 0                         | 1                            | Hypothetical protein (1)                                               |                                                                                                                                                                                                                                                                                                                     | P-loop containing nucleoside triphosphate hydrolase [IPR027417] (1)                                                                                                                                                                                                                                                                                                                                                                           | -                               | -                            | P_trifoliata_00061_mRNA_25.1    |
| GF0044632 | 0                            | 0                         | 1                            | Hypothetical protein (1)                                               |                                                                                                                                                                                                                                                                                                                     |                                                                                                                                                                                                                                                                                                                                                                                                                                               | -                               | -                            | P_trifoliata_00061_mRNA_22.1    |
| GF0044631 | 0                            | 0                         | 1                            | Hypothetical protein (1)                                               | ATP binding [GO:0005524 molecular_function] (1); ATPase activity [GO:0016887 molecular_function] (1)                                                                                                                                                                                                                | ABC transporter-like [IPR003439] (1); P-loop containing nucleoside triphosphate hydrolase [IPR027417] (1)                                                                                                                                                                                                                                                                                                                                     | -                               | -                            | P_trifoliata_00061_mRNA_21.1    |
| GF0044630 | 0                            | 0                         | 1                            | Hypothetical protein (1)                                               |                                                                                                                                                                                                                                                                                                                     |                                                                                                                                                                                                                                                                                                                                                                                                                                               | -                               | -                            | P_trifoliata_00061_mRNA_16.1    |
| GF0044629 | 0                            | 0                         | 1                            | Hypothetical protein (1)                                               |                                                                                                                                                                                                                                                                                                                     |                                                                                                                                                                                                                                                                                                                                                                                                                                               | -                               | -                            | P_trifoliata_00061_mRNA_1.1     |
| GF0044628 | 0                            | 0                         | 1                            | Hypothetical protein (1)                                               |                                                                                                                                                                                                                                                                                                                     | Hydrophobic seed protein [IPR027923] (1); Bi/functional inhibitor/plant lipid transfer protein/seed storage helical domain [IPR016140] (1)                                                                                                                                                                                                                                                                                                    | -                               | -                            | P_trifoliata_00060_mRNA_87.1    |



| ID        | Num. in <i>C. clementiae</i> | Num. in <i>C. canthii</i> | Num. in <i>P. trifoliata</i> | Name                                                 | GO                                                                                                                                                                                                                                                                                                                                                                                                                                                          | InterPro                                                                                                                                                                                                                                                                                                        | Members in <i>C. clementiae</i> | Members in <i>C. canthii</i> | Members in <i>P. trifoliata</i> |
|-----------|------------------------------|---------------------------|------------------------------|------------------------------------------------------|-------------------------------------------------------------------------------------------------------------------------------------------------------------------------------------------------------------------------------------------------------------------------------------------------------------------------------------------------------------------------------------------------------------------------------------------------------------|-----------------------------------------------------------------------------------------------------------------------------------------------------------------------------------------------------------------------------------------------------------------------------------------------------------------|---------------------------------|------------------------------|---------------------------------|
| GF0044627 | 0                            | 0                         | 1                            | 14 kDa proline-rich protein DC2.15 (1)               |                                                                                                                                                                                                                                                                                                                                                                                                                                                             | Hydrophobic seed protein [IPRO27923] (1); Bifunctional inhibitor/platelet transfer protein/seed storage helical domain [IPRO16140] (1)                                                                                                                                                                          |                                 |                              | P_trifoliata_00060_mRNA_85.1    |
| GF0044626 | 0                            | 0                         | 1                            | Hypothetical protein (1)                             |                                                                                                                                                                                                                                                                                                                                                                                                                                                             |                                                                                                                                                                                                                                                                                                                 |                                 |                              | P_trifoliata_00060_mRNA_73.1    |
| GF0044625 | 0                            | 0                         | 1                            | Plant VAP (1)                                        | endoplasmic reticulum membrane [GO:005789 cellular_component] (1)                                                                                                                                                                                                                                                                                                                                                                                           | PapD-like [IPRO08962] (1); Vesicle-associated membrane-protein-associated protein [IPRO16763] (1); Major sperm protein (MSP) domain [IPRO00335] (1); Alpha crystallin/Hsp20 domain [IPRO02068] (1); HSP20-like chaperone [IPRO08978] (1)                                                                        |                                 |                              | P_trifoliata_00060_mRNA_70.1    |
| GF0044624 | 0                            | 0                         | 1                            | Hypothetical protein (1)                             |                                                                                                                                                                                                                                                                                                                                                                                                                                                             |                                                                                                                                                                                                                                                                                                                 |                                 |                              | P_trifoliata_00060_mRNA_6.1     |
| GF0044623 | 0                            | 0                         | 1                            | Ribosomal protein L15 (1)                            | intracellular [GO:0005622 cellular_component] (1); translation [GO:0006412 biological_process] (1); structural constituent of ribosome [GO:0003735 molecular_function] (1); ribosome [GO:0005840 cellular_component] (1)                                                                                                                                                                                                                                    | Ribosomal protein L23/L15e core domain [IPRO12678] (1); Ribosomal protein L15e core domain [IPRO24794] (1); Ribosomal protein L15e [IPRO00439] (1)                                                                                                                                                              |                                 |                              | P_trifoliata_00060_mRNA_43.1    |
| GF0044622 | 0                            | 0                         | 1                            | Ethylene response factor 2 (1)                       | transcription factor activity, sequence-specific DNA binding [GO:0003700 molecular_function] (1); regulation of transcription, DNA-templated [GO:0006355 biological_process] (1); DNA binding [GO:0005677 molecular_function] (1)                                                                                                                                                                                                                           | DNA-binding domain [IPRO16177] (1); AP2/ERF domain [IPRO01471] (1)                                                                                                                                                                                                                                              |                                 |                              | P_trifoliata_00060_mRNA_35.1    |
| GF0044621 | 0                            | 0                         | 1                            | Hypothetical protein (1)                             |                                                                                                                                                                                                                                                                                                                                                                                                                                                             |                                                                                                                                                                                                                                                                                                                 |                                 |                              | P_trifoliata_00060_mRNA_27.1    |
| GF0044620 | 0                            | 0                         | 1                            | Hypothetical protein (1)                             |                                                                                                                                                                                                                                                                                                                                                                                                                                                             | Penitricopeptide repeat [IPRO02885] (1)                                                                                                                                                                                                                                                                         |                                 |                              | P_trifoliata_00060_mRNA_2.1     |
| GF0044619 | 0                            | 0                         | 1                            | Hypothetical protein (1)                             |                                                                                                                                                                                                                                                                                                                                                                                                                                                             |                                                                                                                                                                                                                                                                                                                 |                                 |                              | P_trifoliata_00060_mRNA_17.1    |
| GF0044618 | 0                            | 0                         | 1                            | Hypothetical protein (1)                             |                                                                                                                                                                                                                                                                                                                                                                                                                                                             |                                                                                                                                                                                                                                                                                                                 |                                 |                              | P_trifoliata_00060_mRNA_14.1    |
| GF0044617 | 0                            | 0                         | 1                            | Hypothetical protein (1)                             |                                                                                                                                                                                                                                                                                                                                                                                                                                                             |                                                                                                                                                                                                                                                                                                                 |                                 |                              | P_trifoliata_00060_mRNA_13.1    |
| GF0044616 | 0                            | 0                         | 1                            | Putative wall-associated receptor kinase like 16 (1) | ATP binding [GO:0005524 molecular_function] (1); protein phosphorylation [GO:0006468 biological_process] (1); protein kinase activity [GO:0004672 molecular_function] (1)                                                                                                                                                                                                                                                                                   | Protein kinase-like domain [IPRO11009] (1); Protein kinase domain [IPRO000719] (1); Serine/threonine-protein kinase, active site [IPRO08271] (1); Protein kinase, ATP binding site [IPRO17441] (1); Serine/threonine/dual specificity protein kinase, catalytic domain [IPRO02901] (1)                          |                                 |                              | P_trifoliata_00060_mRNA_11.1    |
| GF0044615 | 0                            | 0                         | 1                            | Hypothetical protein (1)                             | GTPase activity [GO:0003924 molecular_function] (1); GTP binding [GO:0005525 molecular_function] (1)                                                                                                                                                                                                                                                                                                                                                        | Transcription factor, GTP-binding domain [IPRO00795] (1); Tr-type G domain, conserved site [IPRO1157] (1); Transition protein, beta-barrel domain [IPRO09000] (1); Small GTP-binding protein domain [IPRO05225] (1); P-loop containing nucleoside triphosphate hydrolase [IPRO27417] (1)                        |                                 |                              | P_trifoliata_00060_mRNA_1.1     |
| GF0044614 | 0                            | 0                         | 1                            | Hypothetical protein (1)                             |                                                                                                                                                                                                                                                                                                                                                                                                                                                             |                                                                                                                                                                                                                                                                                                                 |                                 |                              | P_trifoliata_00059_mRNA_8.1     |
| GF0044613 | 0                            | 0                         | 1                            | Hypothetical protein (1)                             |                                                                                                                                                                                                                                                                                                                                                                                                                                                             |                                                                                                                                                                                                                                                                                                                 |                                 |                              | P_trifoliata_00059_mRNA_7.1     |
| GF0044612 | 0                            | 0                         | 1                            | Hypothetical protein (1)                             |                                                                                                                                                                                                                                                                                                                                                                                                                                                             |                                                                                                                                                                                                                                                                                                                 |                                 |                              | P_trifoliata_00059_mRNA_6.1     |
| GF0044611 | 0                            | 0                         | 1                            | Hypothetical protein (1)                             |                                                                                                                                                                                                                                                                                                                                                                                                                                                             |                                                                                                                                                                                                                                                                                                                 |                                 |                              | P_trifoliata_00059_mRNA_47.1    |
| GF0044610 | 0                            | 0                         | 1                            | Hypothetical protein (1)                             | cysteine-type peptidase activity [GO:0008224 molecular_function] (1); proteolysis [GO:0006508 biological_process] (1)                                                                                                                                                                                                                                                                                                                                       | Ulp1 protease family, C-terminal catalytic domain [IPRO03653] (1)                                                                                                                                                                                                                                               |                                 |                              | P_trifoliata_00059_mRNA_41.1    |
| GF0044609 | 0                            | 0                         | 1                            | Hypothetical protein (1)                             |                                                                                                                                                                                                                                                                                                                                                                                                                                                             |                                                                                                                                                                                                                                                                                                                 |                                 |                              | P_trifoliata_00059_mRNA_4.1     |
| GF0044608 | 0                            | 0                         | 1                            | Ribonuclease H (1)                                   |                                                                                                                                                                                                                                                                                                                                                                                                                                                             | Reverse transcriptase zinc-binding domain [IPRO20960] (1)                                                                                                                                                                                                                                                       |                                 |                              | P_trifoliata_00059_mRNA_27.1    |
| GF0044607 | 0                            | 0                         | 1                            | Hypothetical protein (1)                             |                                                                                                                                                                                                                                                                                                                                                                                                                                                             | Zinc knuckle CX2CX4HX4C [IPRO25836] (1)                                                                                                                                                                                                                                                                         |                                 |                              | P_trifoliata_00059_mRNA_26.1    |
| GF0044606 | 0                            | 0                         | 1                            | Hypothetical protein (1)                             |                                                                                                                                                                                                                                                                                                                                                                                                                                                             |                                                                                                                                                                                                                                                                                                                 |                                 |                              | P_trifoliata_00059_mRNA_22.1    |
| GF0044605 | 0                            | 0                         | 1                            | Hypothetical protein (1)                             |                                                                                                                                                                                                                                                                                                                                                                                                                                                             |                                                                                                                                                                                                                                                                                                                 |                                 |                              | P_trifoliata_00059_mRNA_19.1    |
| GF0044604 | 0                            | 0                         | 1                            | Hypothetical protein (1)                             |                                                                                                                                                                                                                                                                                                                                                                                                                                                             |                                                                                                                                                                                                                                                                                                                 |                                 |                              | P_trifoliata_00059_mRNA_15.1    |
| GF0044603 | 0                            | 0                         | 1                            | Hypothetical protein (1)                             |                                                                                                                                                                                                                                                                                                                                                                                                                                                             |                                                                                                                                                                                                                                                                                                                 |                                 |                              | P_trifoliata_00059_mRNA_13.1    |
| GF0044602 | 0                            | 0                         | 1                            | Hypothetical protein (1)                             |                                                                                                                                                                                                                                                                                                                                                                                                                                                             |                                                                                                                                                                                                                                                                                                                 |                                 |                              | P_trifoliata_00059_mRNA_12.1    |
| GF0044601 | 0                            | 0                         | 1                            | Hypothetical protein (1)                             |                                                                                                                                                                                                                                                                                                                                                                                                                                                             |                                                                                                                                                                                                                                                                                                                 |                                 |                              | P_trifoliata_00059_mRNA_11.1    |
| GF0044600 | 0                            | 0                         | 1                            | Hypothetical protein (1)                             |                                                                                                                                                                                                                                                                                                                                                                                                                                                             |                                                                                                                                                                                                                                                                                                                 |                                 |                              | P_trifoliata_00059_mRNA_10.1    |
| GF0044599 | 0                            | 0                         | 1                            | Hypothetical protein (1)                             |                                                                                                                                                                                                                                                                                                                                                                                                                                                             |                                                                                                                                                                                                                                                                                                                 |                                 |                              | P_trifoliata_00058_mRNA_88.1    |
| GF0044598 | 0                            | 0                         | 1                            | Hypothetical protein (1)                             |                                                                                                                                                                                                                                                                                                                                                                                                                                                             |                                                                                                                                                                                                                                                                                                                 |                                 |                              | P_trifoliata_00058_mRNA_71.1    |
| GF0044597 | 0                            | 0                         | 1                            | Hypothetical protein (1)                             |                                                                                                                                                                                                                                                                                                                                                                                                                                                             |                                                                                                                                                                                                                                                                                                                 |                                 |                              | P_trifoliata_00058_mRNA_70.1    |
| GF0044596 | 0                            | 0                         | 1                            | Hypothetical protein (1)                             |                                                                                                                                                                                                                                                                                                                                                                                                                                                             |                                                                                                                                                                                                                                                                                                                 |                                 |                              | P_trifoliata_00058_mRNA_69.1    |
| GF0044595 | 0                            | 0                         | 1                            | Hypothetical protein (1)                             |                                                                                                                                                                                                                                                                                                                                                                                                                                                             | Protein-like domain [IPRO08502] (1)                                                                                                                                                                                                                                                                             |                                 |                              | P_trifoliata_00058_mRNA_65.1    |
| GF0044594 | 0                            | 0                         | 1                            | Hypothetical protein (1)                             |                                                                                                                                                                                                                                                                                                                                                                                                                                                             |                                                                                                                                                                                                                                                                                                                 |                                 |                              | P_trifoliata_00058_mRNA_6.1     |
| GF0044593 | 0                            | 0                         | 1                            | Hypothetical protein (1)                             |                                                                                                                                                                                                                                                                                                                                                                                                                                                             |                                                                                                                                                                                                                                                                                                                 |                                 |                              | P_trifoliata_00058_mRNA_56.1    |
| GF0044592 | 0                            | 0                         | 1                            | Hypothetical protein (1)                             |                                                                                                                                                                                                                                                                                                                                                                                                                                                             |                                                                                                                                                                                                                                                                                                                 |                                 |                              | P_trifoliata_00058_mRNA_5.1     |
| GF0044591 | 0                            | 0                         | 1                            | Hypothetical protein (1)                             |                                                                                                                                                                                                                                                                                                                                                                                                                                                             |                                                                                                                                                                                                                                                                                                                 |                                 |                              | P_trifoliata_00058_mRNA_45.1    |
| GF0044590 | 0                            | 0                         | 1                            | Hypothetical protein (1)                             |                                                                                                                                                                                                                                                                                                                                                                                                                                                             |                                                                                                                                                                                                                                                                                                                 |                                 |                              | P_trifoliata_00058_mRNA_38.1    |
| GF0044589 | 0                            | 0                         | 1                            | Hypothetical protein (1)                             |                                                                                                                                                                                                                                                                                                                                                                                                                                                             | Protein of unknown function DUF789 [IPRO08507] (1)                                                                                                                                                                                                                                                              |                                 |                              | P_trifoliata_00058_mRNA_36.1    |
| GF0044588 | 0                            | 0                         | 1                            | Hypothetical protein (1)                             |                                                                                                                                                                                                                                                                                                                                                                                                                                                             | Alr synthase-related protein, C-terminal domain [IPRO19918] (1)                                                                                                                                                                                                                                                 |                                 |                              | P_trifoliata_00058_mRNA_32.1    |
| GF0044587 | 0                            | 0                         | 1                            | Hypothetical protein (1)                             |                                                                                                                                                                                                                                                                                                                                                                                                                                                             |                                                                                                                                                                                                                                                                                                                 |                                 |                              | P_trifoliata_00058_mRNA_29.1    |
| GF0044586 | 0                            | 0                         | 1                            | Hypothetical protein (1)                             |                                                                                                                                                                                                                                                                                                                                                                                                                                                             |                                                                                                                                                                                                                                                                                                                 |                                 |                              | P_trifoliata_00058_mRNA_28.1    |
| GF0044585 | 0                            | 0                         | 1                            | Hypothetical protein (1)                             |                                                                                                                                                                                                                                                                                                                                                                                                                                                             |                                                                                                                                                                                                                                                                                                                 |                                 |                              | P_trifoliata_00058_mRNA_26.1    |
| GF0044584 | 0                            | 0                         | 1                            | Hypothetical protein (1)                             |                                                                                                                                                                                                                                                                                                                                                                                                                                                             |                                                                                                                                                                                                                                                                                                                 |                                 |                              | P_trifoliata_00058_mRNA_2.1     |
| GF0044583 | 0                            | 0                         | 1                            | Hypothetical protein (1)                             | protein geranylgeranylation [GO:0018344 biological_process] (1); Rab geranylgeranyltransferase activity [GO:0004663 molecular_function] (1)                                                                                                                                                                                                                                                                                                                 | Geranylgeranyl transferase type-2 subunit beta [IPRO26873] (1); Terpenoid cyclase/protein prenyltransferase alpha-alpha tetrads [IPRO08930] (1)                                                                                                                                                                 |                                 |                              | P_trifoliata_00058_mRNA_15.1    |
| GF0044582 | 0                            | 0                         | 1                            | Hypothetical protein (1)                             |                                                                                                                                                                                                                                                                                                                                                                                                                                                             |                                                                                                                                                                                                                                                                                                                 |                                 |                              | P_trifoliata_00058_mRNA_13.1    |
| GF0044581 | 0                            | 0                         | 1                            | Hypothetical protein (1)                             |                                                                                                                                                                                                                                                                                                                                                                                                                                                             |                                                                                                                                                                                                                                                                                                                 |                                 |                              | P_trifoliata_00057_mRNA_99.1    |
| GF0044580 | 0                            | 0                         | 1                            | Hypothetical protein (1)                             |                                                                                                                                                                                                                                                                                                                                                                                                                                                             |                                                                                                                                                                                                                                                                                                                 |                                 |                              | P_trifoliata_00057_mRNA_97.1    |
| GF0044579 | 0                            | 0                         | 1                            | Hypothetical protein (1)                             |                                                                                                                                                                                                                                                                                                                                                                                                                                                             |                                                                                                                                                                                                                                                                                                                 |                                 |                              | P_trifoliata_00057_mRNA_96.1    |
| GF0044578 | 0                            | 0                         | 1                            | Hypothetical protein (1)                             |                                                                                                                                                                                                                                                                                                                                                                                                                                                             |                                                                                                                                                                                                                                                                                                                 |                                 |                              | P_trifoliata_00057_mRNA_87.1    |
| GF0044577 | 0                            | 0                         | 1                            | Hypothetical protein (1)                             |                                                                                                                                                                                                                                                                                                                                                                                                                                                             |                                                                                                                                                                                                                                                                                                                 |                                 |                              | P_trifoliata_00057_mRNA_80.1    |
| GF0044576 | 0                            | 0                         | 1                            | Hypothetical protein (1)                             |                                                                                                                                                                                                                                                                                                                                                                                                                                                             |                                                                                                                                                                                                                                                                                                                 |                                 |                              | P_trifoliata_00057_mRNA_77.1    |
| GF0044575 | 0                            | 0                         | 1                            | Hypothetical protein (1)                             |                                                                                                                                                                                                                                                                                                                                                                                                                                                             |                                                                                                                                                                                                                                                                                                                 |                                 |                              | P_trifoliata_00057_mRNA_76.1    |
| GF0044574 | 0                            | 0                         | 1                            | Hypothetical protein (1)                             | exocyst [GO:0000145 cellular_component] (1); vesicle docking involved in exocytosis [GO:0006904 biological_process] (1)                                                                                                                                                                                                                                                                                                                                     | Exocyst complex subunit Sec15-like [IPRO07225] (1)                                                                                                                                                                                                                                                              |                                 |                              | P_trifoliata_00057_mRNA_59.1    |
| GF0044573 | 0                            | 0                         | 1                            | Hypothetical protein (1)                             |                                                                                                                                                                                                                                                                                                                                                                                                                                                             |                                                                                                                                                                                                                                                                                                                 |                                 |                              | P_trifoliata_00057_mRNA_56.1    |
| GF0044572 | 0                            | 0                         | 1                            | Hypothetical protein (1)                             |                                                                                                                                                                                                                                                                                                                                                                                                                                                             |                                                                                                                                                                                                                                                                                                                 |                                 |                              | P_trifoliata_00057_mRNA_48.1    |
| GF0044571 | 0                            | 0                         | 1                            | Hypothetical protein (1)                             |                                                                                                                                                                                                                                                                                                                                                                                                                                                             |                                                                                                                                                                                                                                                                                                                 |                                 |                              | P_trifoliata_00057_mRNA_47.1    |
| GF0044570 | 0                            | 0                         | 1                            | Hypothetical protein (1)                             |                                                                                                                                                                                                                                                                                                                                                                                                                                                             |                                                                                                                                                                                                                                                                                                                 |                                 |                              | P_trifoliata_00057_mRNA_23.1    |
| GF0044569 | 0                            | 0                         | 1                            | Hypothetical protein (1)                             |                                                                                                                                                                                                                                                                                                                                                                                                                                                             |                                                                                                                                                                                                                                                                                                                 |                                 |                              | P_trifoliata_00057_mRNA_16.1    |
| GF0044568 | 0                            | 0                         | 1                            | Hypothetical protein (1)                             |                                                                                                                                                                                                                                                                                                                                                                                                                                                             |                                                                                                                                                                                                                                                                                                                 |                                 |                              | P_trifoliata_00057_mRNA_11.1    |
| GF0044567 | 0                            | 0                         | 1                            | Hypothetical protein (1)                             |                                                                                                                                                                                                                                                                                                                                                                                                                                                             |                                                                                                                                                                                                                                                                                                                 |                                 |                              | P_trifoliata_00057_mRNA_110.1   |
| GF0044566 | 0                            | 0                         | 1                            | Hypothetical protein (1)                             | nucleic acid binding [GO:0003676 molecular_function] (1); oxidoreductase activity, acting on paired donors, with incorporation or reduction of molecular oxygen [GO:0016705 molecular_function] (1); oxidation-reduction process [GO:005114 biological_process] (1); iron ion binding [GO:0005506 molecular_function] (1); heme binding [GO:0020037 molecular_function] (1)                                                                                 | Ribonuclease H-like domain [IPRO12337] (1)                                                                                                                                                                                                                                                                      |                                 |                              | P_trifoliata_00057_mRNA_11.1    |
| GF0044565 | 0                            | 0                         | 1                            | Cytochrome P450 86B1 (1)                             |                                                                                                                                                                                                                                                                                                                                                                                                                                                             | Cytochrome P450 [IPRO01128] (1); Cytochrome P450, conserved site [IPRO17972] (1)                                                                                                                                                                                                                                |                                 |                              | P_trifoliata_00057_mRNA_104.1   |
| GF0044564 | 0                            | 0                         | 1                            | Hypothetical protein (1)                             |                                                                                                                                                                                                                                                                                                                                                                                                                                                             |                                                                                                                                                                                                                                                                                                                 |                                 |                              | P_trifoliata_00057_mRNA_103.1   |
| GF0044563 | 0                            | 0                         | 1                            | Hypothetical protein (1)                             |                                                                                                                                                                                                                                                                                                                                                                                                                                                             |                                                                                                                                                                                                                                                                                                                 |                                 |                              | P_trifoliata_00057_mRNA_102.1   |
| GF0044562 | 0                            | 0                         | 1                            | Hypothetical protein (1)                             |                                                                                                                                                                                                                                                                                                                                                                                                                                                             |                                                                                                                                                                                                                                                                                                                 |                                 |                              | P_trifoliata_00057_mRNA_100.1   |
| GF0044561 | 0                            | 0                         | 1                            | Hypothetical protein (1)                             |                                                                                                                                                                                                                                                                                                                                                                                                                                                             |                                                                                                                                                                                                                                                                                                                 |                                 |                              | P_trifoliata_00057_mRNA_1.1     |
| GF0044560 | 0                            | 0                         | 1                            | Hypothetical protein (1)                             | nucleic acid binding [GO:0003676 molecular_function] (1)                                                                                                                                                                                                                                                                                                                                                                                                    | Ribonuclease H-like domain [IPRO12337] (1)                                                                                                                                                                                                                                                                      |                                 |                              | P_trifoliata_00056_mRNA_91.1    |
| GF0044559 | 0                            | 0                         | 1                            | Hypothetical protein (1)                             | ubiquitin-dependent protein catabolic process [GO:0006511 biological_process] (1); ubiquitin-protein transferase activity [GO:0004842 molecular_function] (1); nucleus [GO:0005634 cellular_component] (1); protein ubiquitination [GO:0016567 biological_process] (1); multicellular organismal development [GO:0007275 biological_process] (1); zinc ion binding [GO:0008270 molecular_function] (1); protein binding [GO:0005515 molecular_function] (1) | Zinc finger, RING/YVY/PHD-type [IPRO13083] (1); SIAH-type domain [IPRO13323] (1); Seven-in-absentia protein, TRAF-like domain [IPRO18121] (1); Zinc finger, SIAH-type [IPRO13010] (1); TRAF-like [IPRO08974] (1); Zinc finger, RING-type [IPRO01841] (1); E3 ubiquitin-protein ligase SIAH-like [IPRO04162] (1) |                                 |                              | P_trifoliata_00056_mRNA_85.1    |
| GF0044558 | 0                            | 0                         | 1                            | E3 ubiquitin-protein ligase (1)                      |                                                                                                                                                                                                                                                                                                                                                                                                                                                             |                                                                                                                                                                                                                                                                                                                 |                                 |                              | P_trifoliata_00056_mRNA_40.1    |
| GF0044557 | 0                            | 0                         | 1                            | Hypothetical protein (1)                             |                                                                                                                                                                                                                                                                                                                                                                                                                                                             |                                                                                                                                                                                                                                                                                                                 |                                 |                              | P_trifoliata_00056_mRNA_32.1    |
| GF0044556 | 0                            | 0                         | 1                            | Hypothetical protein (1)                             |                                                                                                                                                                                                                                                                                                                                                                                                                                                             | WEB family [IPRO08545] (1)                                                                                                                                                                                                                                                                                      |                                 |                              | P_trifoliata_00056_mRNA_3.1     |

| ID        | Num. in <i>C. caryocatactae</i> | Num. in <i>C. canthii</i> | Num. in <i>P. trifoliata</i> | Note                                                              | GO                                                                                                                                                                                                                                                                                                                                                                                                                                                                             | InterPro                                                                                                                                                                                                                                                                                               | Members in <i>C. caryocatactae</i> | Members in <i>C. canthii</i> | Members in <i>P. trifoliata</i> |
|-----------|---------------------------------|---------------------------|------------------------------|-------------------------------------------------------------------|--------------------------------------------------------------------------------------------------------------------------------------------------------------------------------------------------------------------------------------------------------------------------------------------------------------------------------------------------------------------------------------------------------------------------------------------------------------------------------|--------------------------------------------------------------------------------------------------------------------------------------------------------------------------------------------------------------------------------------------------------------------------------------------------------|------------------------------------|------------------------------|---------------------------------|
| GF0044555 | 0                               | 0                         | 1                            | MATE efflux family protein 9 (1)                                  | drug transmembrane transport [GO:0006855 biological_process] (1); membrane [GO:0001602 cellular_component] (1); antiporter activity [GO:0015297 molecular_function] (1); drug transmembrane transporter activity [GO:0015238 molecular_function] (1); transmembrane transport [GO:0055085 biological_process] (1)                                                                                                                                                              | Multi antimicrobial extrusion protein [IPRO02528] (1)                                                                                                                                                                                                                                                  | -                                  | -                            | P_trifoliata_00056_mRNA_13.1    |
| GF0044554 | 0                               | 0                         | 1                            | Hypothetical protein (1)                                          | transferase activity, transferring acyl groups other than amino-acyl groups [GO:0016747 molecular_function] (1)                                                                                                                                                                                                                                                                                                                                                                | Chloramphenicol acetyltransferase-like domain [IPRO2321] (1); Transferase [IPRO03400] (1)                                                                                                                                                                                                              | -                                  | -                            | P_trifoliata_00056_mRNA_108.1   |
| GF0044553 | 0                               | 0                         | 1                            | Salutaridinol 7-O-acetyltransferase (1)                           | transferase activity, transferring acyl groups other than amino-acyl groups [GO:0016747 molecular_function] (1)                                                                                                                                                                                                                                                                                                                                                                | PC-Esterase [IPRO26057] (1); PMRS N-terminal domain [IPRO25846] (1); Trichome birefringence-like family [IPRO29962] (1); Chloramphenicol acetyltransferase-like domain [IPRO2321] (1)                                                                                                                  | -                                  | -                            | P_trifoliata_00056_mRNA_107.1   |
| GF0044552 | 0                               | 0                         | 1                            | Protein trichome birefringence-like 33 (1)                        |                                                                                                                                                                                                                                                                                                                                                                                                                                                                                |                                                                                                                                                                                                                                                                                                        | -                                  | -                            | P_trifoliata_00056_mRNA_107.1   |
| GF0044551 | 0                               | 0                         | 1                            | Hypothetical protein (1)                                          | regulation of transcription, DNA-templated [GO:0006355 biological_process] (1)                                                                                                                                                                                                                                                                                                                                                                                                 | FAR1 DNA binding domain [IPRO04330] (1); FHY3/FAR1 family [IPRO31052] (1)                                                                                                                                                                                                                              | -                                  | -                            | P_trifoliata_00055_mRNA_96.1    |
| GF0044550 | 0                               | 0                         | 1                            | Hypothetical protein (1)                                          |                                                                                                                                                                                                                                                                                                                                                                                                                                                                                |                                                                                                                                                                                                                                                                                                        | -                                  | -                            | P_trifoliata_00055_mRNA_94.1    |
| GF0044549 | 0                               | 0                         | 1                            | Hypothetical protein (1)                                          |                                                                                                                                                                                                                                                                                                                                                                                                                                                                                |                                                                                                                                                                                                                                                                                                        | -                                  | -                            | P_trifoliata_00055_mRNA_93.1    |
| GF0044548 | 0                               | 0                         | 1                            | Hypothetical protein (1)                                          |                                                                                                                                                                                                                                                                                                                                                                                                                                                                                |                                                                                                                                                                                                                                                                                                        | -                                  | -                            | P_trifoliata_00055_mRNA_73.1    |
| GF0044547 | 0                               | 0                         | 1                            | Hypothetical protein (1)                                          | actin filament binding [GO:0051015 molecular_function] (1); actin filament bundle assembly [GO:0051017 biological_process] (1); actin binding [GO:0003779 molecular_function] (1)                                                                                                                                                                                                                                                                                              | ADF-H Gelsolin-like domain [IPRO29088] (1); Villin-2/3/4/5, plant [IPRO30009] (1); Gelsolin-like domain [IPRO07123] (1); Villin/Gelsolin [IPRO07122] (1)                                                                                                                                               | -                                  | -                            | P_trifoliata_00055_mRNA_61.1    |
| GF0044546 | 0                               | 0                         | 1                            | Hypothetical protein (1)                                          |                                                                                                                                                                                                                                                                                                                                                                                                                                                                                |                                                                                                                                                                                                                                                                                                        | -                                  | -                            | P_trifoliata_00055_mRNA_56.1    |
| GF0044545 | 0                               | 0                         | 1                            | Hypothetical protein (1)                                          |                                                                                                                                                                                                                                                                                                                                                                                                                                                                                |                                                                                                                                                                                                                                                                                                        | -                                  | -                            | P_trifoliata_00055_mRNA_38.1    |
| GF0044544 | 0                               | 0                         | 1                            | Hypothetical protein (1)                                          |                                                                                                                                                                                                                                                                                                                                                                                                                                                                                |                                                                                                                                                                                                                                                                                                        | -                                  | -                            | P_trifoliata_00055_mRNA_20.1    |
| GF0044543 | 0                               | 0                         | 1                            | Hypothetical protein (1)                                          |                                                                                                                                                                                                                                                                                                                                                                                                                                                                                |                                                                                                                                                                                                                                                                                                        | -                                  | -                            | P_trifoliata_00055_mRNA_18.1    |
| GF0044542 | 0                               | 0                         | 1                            | Phosphatase PMU1 (1)                                              |                                                                                                                                                                                                                                                                                                                                                                                                                                                                                |                                                                                                                                                                                                                                                                                                        | -                                  | -                            | P_trifoliata_00055_mRNA_15.1    |
| GF0044541 | 0                               | 0                         | 1                            | Phosphoglycerate mutase family protein (1)                        | catalytic activity [GO:0003824 molecular_function] (1); metabolic process [GO:0008152 biological_process] (1)                                                                                                                                                                                                                                                                                                                                                                  | Hispidine phosphatase superfamily [IPRO29033] (1); Hispidine phosphatase superfamily, clade-1 [IPRO13078] (1); Phosphoglycerate/bisphosphoglycerate mutase, active site [IPRO01345] (1); Hispidine phosphatase superfamily, clade-1 [IPRO13078] (1); Hispidine phosphatase superfamily [IPRO29033] (1) | -                                  | -                            | P_trifoliata_00055_mRNA_13.1    |
| GF0044540 | 0                               | 0                         | 1                            | Hypothetical protein (1)                                          |                                                                                                                                                                                                                                                                                                                                                                                                                                                                                |                                                                                                                                                                                                                                                                                                        | -                                  | -                            | P_trifoliata_00055_mRNA_100.1   |
| GF0044539 | 0                               | 0                         | 1                            | Phosphoglycerate mutase family protein (1)                        | metabolic process [GO:0008152 biological_process] (1); catalytic activity [GO:0003824 molecular_function] (1)                                                                                                                                                                                                                                                                                                                                                                  | Hispidine phosphatase superfamily [IPRO29033] (1); Phosphoglycerate/bisphosphoglycerate mutase, active site [IPRO01345] (1)                                                                                                                                                                            | -                                  | -                            | P_trifoliata_00055_mRNA_10.1    |
| GF0044538 | 0                               | 0                         | 1                            | Hypothetical protein (1)                                          |                                                                                                                                                                                                                                                                                                                                                                                                                                                                                |                                                                                                                                                                                                                                                                                                        | -                                  | -                            | P_trifoliata_00054_mRNA_90.1    |
| GF0044537 | 0                               | 0                         | 1                            | Hypothetical protein (1)                                          |                                                                                                                                                                                                                                                                                                                                                                                                                                                                                |                                                                                                                                                                                                                                                                                                        | -                                  | -                            | P_trifoliata_00054_mRNA_81.1    |
| GF0044536 | 0                               | 0                         | 1                            | Hypothetical protein (1)                                          |                                                                                                                                                                                                                                                                                                                                                                                                                                                                                |                                                                                                                                                                                                                                                                                                        | -                                  | -                            | P_trifoliata_00054_mRNA_65.1    |
| GF0044535 | 0                               | 0                         | 1                            | Hypothetical protein (1)                                          |                                                                                                                                                                                                                                                                                                                                                                                                                                                                                |                                                                                                                                                                                                                                                                                                        | -                                  | -                            | P_trifoliata_00054_mRNA_63.1    |
| GF0044534 | 0                               | 0                         | 1                            | Vesicle-associated membrane protein 713 (1)                       | transport [GO:0006810 biological_process] (1)                                                                                                                                                                                                                                                                                                                                                                                                                                  | Longin domain [IPRO10908] (1); Longin-like domain [IPRO11021] (1)                                                                                                                                                                                                                                      | -                                  | -                            | P_trifoliata_00054_mRNA_54.1    |
| GF0044533 | 0                               | 0                         | 1                            | Hypothetical protein (1)                                          | nucleic acid binding [GO:0003676 molecular_function] (1); DNA binding [GO:0003677 molecular_function] (1)                                                                                                                                                                                                                                                                                                                                                                      | hAT-like transposase, RNase-H fold [IPRO25525] (1); Ribonuclease H-like domain [IPRO12337] (1)                                                                                                                                                                                                         | -                                  | -                            | P_trifoliata_00054_mRNA_50.1    |
| GF0044532 | 0                               | 0                         | 1                            | Hypothetical protein (1)                                          |                                                                                                                                                                                                                                                                                                                                                                                                                                                                                |                                                                                                                                                                                                                                                                                                        | -                                  | -                            | P_trifoliata_00054_mRNA_48.1    |
| GF0044531 | 0                               | 0                         | 1                            | Hypothetical protein (1)                                          |                                                                                                                                                                                                                                                                                                                                                                                                                                                                                |                                                                                                                                                                                                                                                                                                        | -                                  | -                            | P_trifoliata_00054_mRNA_43.1    |
| GF0044530 | 0                               | 0                         | 1                            | Hypothetical protein (1)                                          | peroxidase activity [GO:0004601 molecular_function] (1); oxidation-reduction process [GO:005114 biological_process] (1); response to oxidative stress [GO:0006979 biological_process] (1); heme binding [GO:0020037 molecular_function] (1)                                                                                                                                                                                                                                    | Haem peroxidase, plant/fungal/bacterial [IPRO2010] (1); Plant peroxidase [IPRO08823] (1); Haem peroxidase [IPRO10255] (1)                                                                                                                                                                              | -                                  | -                            | P_trifoliata_00054_mRNA_3.1     |
| GF0044529 | 0                               | 0                         | 1                            | Hypothetical protein (1)                                          |                                                                                                                                                                                                                                                                                                                                                                                                                                                                                |                                                                                                                                                                                                                                                                                                        | -                                  | -                            | P_trifoliata_00054_mRNA_108.1   |
| GF0044528 | 0                               | 0                         | 1                            | Hypothetical protein (1)                                          |                                                                                                                                                                                                                                                                                                                                                                                                                                                                                |                                                                                                                                                                                                                                                                                                        | -                                  | -                            | P_trifoliata_00053_mRNA_98.1    |
| GF0044527 | 0                               | 0                         | 1                            | Hypothetical protein (1)                                          |                                                                                                                                                                                                                                                                                                                                                                                                                                                                                |                                                                                                                                                                                                                                                                                                        | -                                  | -                            | P_trifoliata_00053_mRNA_97.1    |
| GF0044526 | 0                               | 0                         | 1                            | Hypothetical protein (1)                                          |                                                                                                                                                                                                                                                                                                                                                                                                                                                                                |                                                                                                                                                                                                                                                                                                        | -                                  | -                            | P_trifoliata_00053_mRNA_93.1    |
| GF0044525 | 0                               | 0                         | 1                            | Hypothetical protein (1)                                          |                                                                                                                                                                                                                                                                                                                                                                                                                                                                                |                                                                                                                                                                                                                                                                                                        | -                                  | -                            | P_trifoliata_00053_mRNA_84.1    |
| GF0044524 | 0                               | 0                         | 1                            | Hypothetical protein (1)                                          |                                                                                                                                                                                                                                                                                                                                                                                                                                                                                |                                                                                                                                                                                                                                                                                                        | -                                  | -                            | P_trifoliata_00053_mRNA_77.1    |
| GF0044523 | 0                               | 0                         | 1                            | Cytochrome P450 82A4 (1)                                          | iron ion binding [GO:0005506 molecular_function] (1); heme binding [GO:0020037 molecular_function] (1); oxidoreductase activity, acting on paired donors, with incorporation or reduction of molecular oxygen [GO:0016705 molecular_function] (1); oxidation-reduction process [GO:005114 biological_process] (1)                                                                                                                                                              | Cytochrome P450, C-class, group I [IPRO02401] (1); Cytochrome P450 [IPRO01128] (1)                                                                                                                                                                                                                     | -                                  | -                            | P_trifoliata_00053_mRNA_75.1    |
| GF0044522 | 0                               | 0                         | 1                            | Ninja-family protein AFP3 (1)                                     | signal transduction [GO:0007165 biological_process] (1)                                                                                                                                                                                                                                                                                                                                                                                                                        | Jas TPL-binding domain [IPRO23208] (1); Ninja family [IPRO3107] (1)                                                                                                                                                                                                                                    | -                                  | -                            | P_trifoliata_00053_mRNA_73.1    |
| GF0044521 | 0                               | 0                         | 1                            | Hypothetical protein (1)                                          |                                                                                                                                                                                                                                                                                                                                                                                                                                                                                |                                                                                                                                                                                                                                                                                                        | -                                  | -                            | P_trifoliata_00053_mRNA_60.1    |
| GF0044520 | 0                               | 0                         | 1                            | Cytochrome b5 (1)                                                 | heme binding [GO:0020037 molecular_function] (1)                                                                                                                                                                                                                                                                                                                                                                                                                               | Cytochrome b5, heme-binding site [IPRO18506] (1); Cytochrome b5-like heme tetraol binding domain [IPRO01199] (1)                                                                                                                                                                                       | -                                  | -                            | P_trifoliata_00053_mRNA_42.1    |
| GF0044519 | 0                               | 0                         | 1                            | Hypothetical protein (1)                                          |                                                                                                                                                                                                                                                                                                                                                                                                                                                                                |                                                                                                                                                                                                                                                                                                        | -                                  | -                            | P_trifoliata_00053_mRNA_39.1    |
| GF0044518 | 0                               | 0                         | 1                            | Hypothetical protein (1)                                          | ATP binding [GO:0005524 molecular_function] (1)                                                                                                                                                                                                                                                                                                                                                                                                                                | Chaperonin Cpn60/TCP-1 family [IPRO02423] (1); GroEL-like equatorial domain [IPRO27413] (1)                                                                                                                                                                                                            | -                                  | -                            | P_trifoliata_00053_mRNA_38.1    |
| GF0044517 | 0                               | 0                         | 1                            | Hypothetical protein (1)                                          |                                                                                                                                                                                                                                                                                                                                                                                                                                                                                |                                                                                                                                                                                                                                                                                                        | -                                  | -                            | P_trifoliata_00053_mRNA_33.1    |
| GF0044516 | 0                               | 0                         | 1                            | Hypothetical protein (1)                                          | regulation of transcription, DNA-templated [GO:0006355 biological_process] (1)                                                                                                                                                                                                                                                                                                                                                                                                 | MULE transposase domain [IPRO18289] (1); FHY3/FAR1 family [IPRO31052] (1)                                                                                                                                                                                                                              | -                                  | -                            | P_trifoliata_00053_mRNA_31.1    |
| GF0044515 | 0                               | 0                         | 1                            | AT3G24740 protein (1)                                             |                                                                                                                                                                                                                                                                                                                                                                                                                                                                                |                                                                                                                                                                                                                                                                                                        | -                                  | -                            | P_trifoliata_00053_mRNA_16.1    |
| GF0044514 | 0                               | 0                         | 1                            | Hypothetical protein (1)                                          |                                                                                                                                                                                                                                                                                                                                                                                                                                                                                |                                                                                                                                                                                                                                                                                                        | -                                  | -                            | P_trifoliata_00053_mRNA_123.1   |
| GF0044513 | 0                               | 0                         | 1                            | LOB domain-containing protein 20 (1)                              | histone-lysine N-methyltransferase activity [GO:0018024 molecular_function] (1); protein binding [GO:0005515 molecular_function] (1); zinc ion binding [GO:0008270 molecular_function] (1); histone lysine methylation [GO:0034968 biological_process] (1); nucleus [GO:0005634 cellular_component] (1)                                                                                                                                                                        | Post-SET domain [IPRO03616] (1); Pre-SET domain [IPRO07723] (1); SET domain [IPRO01214] (1)                                                                                                                                                                                                            | -                                  | -                            | P_trifoliata_00053_mRNA_121.1   |
| GF0044512 | 0                               | 0                         | 1                            | Histone-lysine N-methyltransferase SUV39 (1)                      |                                                                                                                                                                                                                                                                                                                                                                                                                                                                                |                                                                                                                                                                                                                                                                                                        | -                                  | -                            | P_trifoliata_00053_mRNA_121.1   |
| GF0044511 | 0                               | 0                         | 1                            | Condensin complex subunit 3 (1)                                   |                                                                                                                                                                                                                                                                                                                                                                                                                                                                                |                                                                                                                                                                                                                                                                                                        | -                                  | -                            | P_trifoliata_00053_mRNA_12.1    |
| GF0044510 | 0                               | 0                         | 1                            | Hypothetical protein (1)                                          |                                                                                                                                                                                                                                                                                                                                                                                                                                                                                |                                                                                                                                                                                                                                                                                                        | -                                  | -                            | P_trifoliata_00053_mRNA_104.1   |
| GF0044509 | 0                               | 0                         | 1                            | Hypothetical protein (1)                                          |                                                                                                                                                                                                                                                                                                                                                                                                                                                                                |                                                                                                                                                                                                                                                                                                        | -                                  | -                            | P_trifoliata_00053_mRNA_10.1    |
| GF0044508 | 0                               | 0                         | 1                            | Hypothetical protein (1)                                          |                                                                                                                                                                                                                                                                                                                                                                                                                                                                                |                                                                                                                                                                                                                                                                                                        | -                                  | -                            | P_trifoliata_00052_mRNA_9.1     |
| GF0044507 | 0                               | 0                         | 1                            | Hypothetical protein (1)                                          |                                                                                                                                                                                                                                                                                                                                                                                                                                                                                |                                                                                                                                                                                                                                                                                                        | -                                  | -                            | P_trifoliata_00052_mRNA_83.1    |
| GF0044506 | 0                               | 0                         | 1                            | Hypothetical protein (1)                                          |                                                                                                                                                                                                                                                                                                                                                                                                                                                                                |                                                                                                                                                                                                                                                                                                        | -                                  | -                            | P_trifoliata_00052_mRNA_81.1    |
| GF0044505 | 0                               | 0                         | 1                            | Hypothetical protein (1)                                          | nucleic acid binding [GO:0003676 molecular_function] (1); xyloglucan:xyloglucosyl transferase activity [GO:0016762 molecular_function] (1); carbohydrate metabolic process [GO:0005975 biological_process] (1); hydrolase activity, hydrolyzing O-glycosyl compounds [GO:0004553 molecular_function] (1); cell wall [GO:0005618 cellular_component] (1); cellular glycan metabolic process [GO:0006073 biological_process] (1); sporoplast [GO:0048046 cellular_component] (1) | Ribonuclease H-like domain [IPRO12337] (1)                                                                                                                                                                                                                                                             | -                                  | -                            | P_trifoliata_00052_mRNA_79.1    |
| GF0044504 | 0                               | 0                         | 1                            | Putative xyloglucan endotransglucosylase/hydrolase protein 23 (1) |                                                                                                                                                                                                                                                                                                                                                                                                                                                                                |                                                                                                                                                                                                                                                                                                        | -                                  | -                            | P_trifoliata_00052_mRNA_76.1    |
| GF0044503 | 0                               | 0                         | 1                            | Hypothetical protein (1)                                          |                                                                                                                                                                                                                                                                                                                                                                                                                                                                                |                                                                                                                                                                                                                                                                                                        | -                                  | -                            | P_trifoliata_00052_mRNA_74.1    |
| GF0044502 | 0                               | 0                         | 1                            | Hypothetical protein (1)                                          |                                                                                                                                                                                                                                                                                                                                                                                                                                                                                |                                                                                                                                                                                                                                                                                                        | -                                  | -                            | P_trifoliata_00052_mRNA_72.1    |
| GF0044501 | 0                               | 0                         | 1                            | Putative disease resistance protein RGA1 (1)                      |                                                                                                                                                                                                                                                                                                                                                                                                                                                                                |                                                                                                                                                                                                                                                                                                        | -                                  | -                            | P_trifoliata_00052_mRNA_71.1    |
| GF0044500 | 0                               | 0                         | 1                            | Hypothetical protein (1)                                          | ADP binding [GO:0043531 molecular_function] (1)                                                                                                                                                                                                                                                                                                                                                                                                                                | P-loop containing nucleoside triphosphate hydrolase [IPRO27417] (1); NB-ARC [IPRO02182] (1)                                                                                                                                                                                                            | -                                  | -                            | P_trifoliata_00052_mRNA_70.1    |

| ID        | Num. in <i>C. clementiae</i> | Num. in <i>C. canthii</i> | Num. in <i>P. trifoliata</i> | Note                                                                                          | GO                                                                                                                                                                                                                                                                                                                                                                                                                                                                                       | InterPro                                                                                                                                                                                                                                                                                                             | Members in <i>C. clementiae</i> | Members in <i>C. canthii</i> | Members in <i>P. trifoliata</i> |
|-----------|------------------------------|---------------------------|------------------------------|-----------------------------------------------------------------------------------------------|------------------------------------------------------------------------------------------------------------------------------------------------------------------------------------------------------------------------------------------------------------------------------------------------------------------------------------------------------------------------------------------------------------------------------------------------------------------------------------------|----------------------------------------------------------------------------------------------------------------------------------------------------------------------------------------------------------------------------------------------------------------------------------------------------------------------|---------------------------------|------------------------------|---------------------------------|
| GF0044499 | 0                            | 0                         | 1                            | Ankyrin repeat family protein (1)                                                             | protein binding [GO:0005515 molecular_function] (1); nucleotide binding [GO:0000166 molecular_function] (1); integral component of membrane [GO:0016021 cellular_component] (1); metal ion binding [GO:0046872 molecular_function] (1)                                                                                                                                                                                                                                                   | Ankyrin repeat [IPR002110] (1); Ankyrin repeat-containing domain [IPR020883] (1)                                                                                                                                                                                                                                     | -                               | -                            | P_trifoliata_00052_mRNA_68.1    |
| GF0044498 | 0                            | 0                         | 1                            | Truncated putative heavy metal transporter variant 2 (1)                                      |                                                                                                                                                                                                                                                                                                                                                                                                                                                                                          | P-type ATPase A domain [IPR008250] (1); P-type ATPase [IPR01757] (1)                                                                                                                                                                                                                                                 | -                               | -                            | P_trifoliata_00052_mRNA_63.1    |
| GF0044497 | 0                            | 0                         | 1                            | Hypothetical protein (1)                                                                      |                                                                                                                                                                                                                                                                                                                                                                                                                                                                                          |                                                                                                                                                                                                                                                                                                                      | -                               | -                            | P_trifoliata_00052_mRNA_61.1    |
| GF0044496 | 0                            | 0                         | 1                            | Hypothetical protein (1)                                                                      |                                                                                                                                                                                                                                                                                                                                                                                                                                                                                          |                                                                                                                                                                                                                                                                                                                      | -                               | -                            | P_trifoliata_00052_mRNA_60.1    |
| GF0044495 | 0                            | 0                         | 1                            | Hypothetical protein (1)                                                                      |                                                                                                                                                                                                                                                                                                                                                                                                                                                                                          |                                                                                                                                                                                                                                                                                                                      | -                               | -                            | P_trifoliata_00052_mRNA_6.1     |
| GF0044494 | 0                            | 0                         | 1                            | ABC transporter G family member 29 (1)                                                        | membrane [GO:0016020 cellular_component] (1)                                                                                                                                                                                                                                                                                                                                                                                                                                             | ABC-2 type transporter [IPR013525] (1)                                                                                                                                                                                                                                                                               | -                               | -                            | P_trifoliata_00052_mRNA_4.1     |
| GF0044493 | 0                            | 0                         | 1                            | Orf258 protein (1)                                                                            |                                                                                                                                                                                                                                                                                                                                                                                                                                                                                          | Reverse transcriptase zinc-binding domain [IPR029960] (1)                                                                                                                                                                                                                                                            | -                               | -                            | P_trifoliata_00052_mRNA_39.1    |
| GF0044492 | 0                            | 0                         | 1                            | Hypothetical protein (1)                                                                      |                                                                                                                                                                                                                                                                                                                                                                                                                                                                                          |                                                                                                                                                                                                                                                                                                                      | -                               | -                            | P_trifoliata_00052_mRNA_37.1    |
| GF0044491 | 0                            | 0                         | 1                            | Phytohelatin synthetase-like protein (1)                                                      | cell growth [GO:0016049 biological_process] (1); anchored component of membrane [GO:0031225 cellular_component] (1); cellulose microfibril organization [GO:0010215 biological_process] (1)                                                                                                                                                                                                                                                                                              | COBRA_plant [IPR006918] (1)                                                                                                                                                                                                                                                                                          | -                               | -                            | P_trifoliata_00052_mRNA_36.1    |
| GF0044490 | 0                            | 0                         | 1                            | Hypothetical protein (1)                                                                      |                                                                                                                                                                                                                                                                                                                                                                                                                                                                                          |                                                                                                                                                                                                                                                                                                                      | -                               | -                            | P_trifoliata_00052_mRNA_35.1    |
| GF0044489 | 0                            | 0                         | 1                            | Hypothetical protein (1)                                                                      |                                                                                                                                                                                                                                                                                                                                                                                                                                                                                          |                                                                                                                                                                                                                                                                                                                      | -                               | -                            | P_trifoliata_00052_mRNA_34.1    |
| GF0044488 | 0                            | 0                         | 1                            | Hypothetical protein (1)                                                                      |                                                                                                                                                                                                                                                                                                                                                                                                                                                                                          |                                                                                                                                                                                                                                                                                                                      | -                               | -                            | P_trifoliata_00052_mRNA_26.1    |
| GF0044487 | 0                            | 0                         | 1                            | Decetylbindolase O-acetyltransferase (1)                                                      | transferase activity, transferring acyl groups other than amino-acyl groups [GO:0016747 molecular_function] (1)                                                                                                                                                                                                                                                                                                                                                                          | Viral movement protein [IPR028919] (1); Chloramphenicol acetyltransferase-like domain [IPR023123] (1); Transferase [IPR005480] (1)                                                                                                                                                                                   | -                               | -                            | P_trifoliata_00052_mRNA_25.1    |
| GF0044486 | 0                            | 0                         | 1                            | Hypothetical protein (1)                                                                      |                                                                                                                                                                                                                                                                                                                                                                                                                                                                                          |                                                                                                                                                                                                                                                                                                                      | -                               | -                            | P_trifoliata_00052_mRNA_24.1    |
| GF0044485 | 0                            | 0                         | 1                            | Hypothetical protein (1)                                                                      |                                                                                                                                                                                                                                                                                                                                                                                                                                                                                          |                                                                                                                                                                                                                                                                                                                      | -                               | -                            | P_trifoliata_00052_mRNA_21.1    |
| GF0044484 | 0                            | 0                         | 1                            | Hypothetical protein (1)                                                                      | nucleic acid binding [GO:0003676 molecular_function] (1); zinc ion binding [GO:0008270 molecular_function] (1)                                                                                                                                                                                                                                                                                                                                                                           | Zinc finger, CCHC-type [IPR001878] (1); Reverse transcriptase domain [IPR008472] (1); Viral movement protein [IPR029919] (1)                                                                                                                                                                                         | -                               | -                            | P_trifoliata_00052_mRNA_13.1    |
| GF0044483 | 0                            | 0                         | 1                            | Hypothetical protein (1)                                                                      |                                                                                                                                                                                                                                                                                                                                                                                                                                                                                          |                                                                                                                                                                                                                                                                                                                      | -                               | -                            | P_trifoliata_00052_mRNA_12.1    |
| GF0044482 | 0                            | 0                         | 1                            | Hypothetical protein (1)                                                                      |                                                                                                                                                                                                                                                                                                                                                                                                                                                                                          |                                                                                                                                                                                                                                                                                                                      | -                               | -                            | P_trifoliata_00052_mRNA_10.1    |
| GF0044481 | 0                            | 0                         | 1                            | AP2/B3 transcriptional factor family protein (1)                                              |                                                                                                                                                                                                                                                                                                                                                                                                                                                                                          | DNA-binding pseudobarrel domain [IPR015300] (1)                                                                                                                                                                                                                                                                      | -                               | -                            | P_trifoliata_00051_mRNA_91.1    |
| GF0044480 | 0                            | 0                         | 1                            | AP2/B3 transcriptional factor family protein (1)                                              |                                                                                                                                                                                                                                                                                                                                                                                                                                                                                          | DNA-binding pseudobarrel domain [IPR015300] (1)                                                                                                                                                                                                                                                                      | -                               | -                            | P_trifoliata_00051_mRNA_88.1    |
| GF0044479 | 0                            | 0                         | 1                            | Hypothetical protein (1)                                                                      |                                                                                                                                                                                                                                                                                                                                                                                                                                                                                          |                                                                                                                                                                                                                                                                                                                      | -                               | -                            | P_trifoliata_00051_mRNA_84.1    |
| GF0044478 | 0                            | 0                         | 1                            | Homogenisate phytyltransferase 2 (1)                                                          | prenyltransferase activity [GO:0004659 molecular_function] (1); integral component of membrane [GO:0016021 cellular_component] (1)                                                                                                                                                                                                                                                                                                                                                       | UbA prenyltransferase family [IPR00537] (1)                                                                                                                                                                                                                                                                          | -                               | -                            | P_trifoliata_00051_mRNA_83.1    |
| GF0044477 | 0                            | 0                         | 1                            | Mitogen activated protein kinase kinase 3, mapkk3, mekk3, putative (1)                        | protein phosphorylation [GO:0006468 biological_process] (1); protein kinase activity [GO:0004672 molecular_function] (1); ATP binding [GO:0005524 molecular_function] (1)                                                                                                                                                                                                                                                                                                                | Serine/threonine dual specificity protein kinase, catalytic domain [IPR002290] (1); Protein kinase, ATP binding site [IPR017441] (1); Protein kinase domain [IPR008719] (1); Protein kinase-like domain [IPR011099] (1)                                                                                              | -                               | -                            | P_trifoliata_00051_mRNA_76.1    |
| GF0044476 | 0                            | 0                         | 1                            | Short-chain dehydrogenase TIC 32, chloroplatic (1)                                            | metabolic process [GO:0008152 biological_process] (1); oxidoreductase activity [GO:0016491 molecular_function] (1)                                                                                                                                                                                                                                                                                                                                                                       | Short-chain dehydrogenase/reductase SDR [IPR02198] (1); Glucose/ribose dehydrogenase [IPR023473] (1); NAD(P)-binding domain [IPR016040] (1)                                                                                                                                                                          | -                               | -                            | P_trifoliata_00051_mRNA_73.1    |
| GF0044475 | 0                            | 0                         | 1                            | Hypothetical protein (1)                                                                      |                                                                                                                                                                                                                                                                                                                                                                                                                                                                                          |                                                                                                                                                                                                                                                                                                                      | -                               | -                            | P_trifoliata_00051_mRNA_60.1    |
| GF0044474 | 0                            | 0                         | 1                            | Hypothetical protein (1)                                                                      |                                                                                                                                                                                                                                                                                                                                                                                                                                                                                          |                                                                                                                                                                                                                                                                                                                      | -                               | -                            | P_trifoliata_00051_mRNA_52.1    |
| GF0044473 | 0                            | 0                         | 1                            | Hypothetical protein (1)                                                                      |                                                                                                                                                                                                                                                                                                                                                                                                                                                                                          |                                                                                                                                                                                                                                                                                                                      | -                               | -                            | P_trifoliata_00051_mRNA_51.1    |
| GF0044472 | 0                            | 0                         | 1                            | Hypothetical protein (1)                                                                      | protein binding [GO:0005515 molecular_function] (1); nucleic acid binding [GO:0003676 molecular_function] (1); ATP binding [GO:0005524 molecular_function] (1)                                                                                                                                                                                                                                                                                                                           | Helicase superfamily 1/2, ATP-binding domain [IPR014001] (1); P-loop containing nucleotide triphosphate hydrolase [IPR027417] (1); Sec63 domain [IPR004179] (1); DEAD/DEAF box helicase domain [IPR01545] (1); Helicase, C-terminal [IPR001650] (1); C2 domain [IPR000008] (1); Immunoglobulin E-set [IPR014756] (1) | -                               | -                            | P_trifoliata_00051_mRNA_46.1    |
| GF0044471 | 0                            | 0                         | 1                            | Hypothetical protein (1)                                                                      | protein folding [GO:0006457 biological_process] (1); unfolded protein binding [GO:0051082 molecular_function] (1); ATP binding [GO:0005524 molecular_function] (1); response to stress [GO:0006950 biological_process] (1)                                                                                                                                                                                                                                                               | Heat shock protein Hsp90 family [IPR001404] (1)                                                                                                                                                                                                                                                                      | -                               | -                            | P_trifoliata_00051_mRNA_112.1   |
| GF0044470 | 0                            | 0                         | 1                            | Glutaminyl-peptide cyclotransferase (1)                                                       | protein binding [GO:0005515 molecular_function] (1)                                                                                                                                                                                                                                                                                                                                                                                                                                      | WD40/YVTN-repeat-like-containing domain [IPR015943] (1); Glutamine cyclotransferase [IPR007788] (1)                                                                                                                                                                                                                  | -                               | -                            | P_trifoliata_00051_mRNA_110.1   |
| GF0044469 | 0                            | 0                         | 1                            | Hypothetical protein (1)                                                                      |                                                                                                                                                                                                                                                                                                                                                                                                                                                                                          |                                                                                                                                                                                                                                                                                                                      | -                               | -                            | P_trifoliata_00051_mRNA_101.1   |
| GF0044468 | 0                            | 0                         | 1                            | Hydroxyproline-rich glycoprotein family protein, putative (1)                                 |                                                                                                                                                                                                                                                                                                                                                                                                                                                                                          | Late embryogenesis abundant protein, LEA-14 [IPR004864] (1)                                                                                                                                                                                                                                                          | -                               | -                            | P_trifoliata_00050_mRNA_98.1    |
| GF0044467 | 0                            | 0                         | 1                            | Exocyst complex component 7 (1)                                                               | exocyst [GO:0000145 cellular_component] (1); exocytosis [GO:0006887 biological_process] (1)                                                                                                                                                                                                                                                                                                                                                                                              | Cullin repeat-like-containing domain [IPR016159] (1); Exocyst complex protein Exo70 [IPR004140] (1)                                                                                                                                                                                                                  | -                               | -                            | P_trifoliata_00050_mRNA_97.1    |
| GF0044466 | 0                            | 0                         | 1                            | Bifunctional inhibitor/lipid-transfer protein/seed storage 2S albumin superfamily protein (1) |                                                                                                                                                                                                                                                                                                                                                                                                                                                                                          | Bifunctional inhibitor-plant lipid transfer protein/seed storage helical domain [IPR016140] (1)                                                                                                                                                                                                                      | -                               | -                            | P_trifoliata_00050_mRNA_7.1     |
| GF0044465 | 0                            | 0                         | 1                            | Hypothetical protein (1)                                                                      |                                                                                                                                                                                                                                                                                                                                                                                                                                                                                          |                                                                                                                                                                                                                                                                                                                      | -                               | -                            | P_trifoliata_00050_mRNA_67.1    |
| GF0044464 | 0                            | 0                         | 1                            | Hypothetical protein (1)                                                                      | activation of anaphase-promoting complex activity [GO:0051488 biological_process] (1); anaphase-promoting complex binding [GO:0010997 molecular_function] (1); protein binding [GO:0005515 molecular_function] (1); ubiquitin-protein transferase activator activity [GO:0097027 molecular_function] (1)                                                                                                                                                                                 | WD40-repeat-containing domain [IPR017986] (1); WD40 repeat [IPR001680] (1); WD40/YVTN repeat-like-containing domain [IPR015943] (1); WD40 repeat, conserved site [IPR019775] (1); The WD repeat Cdc20/Fizzy family [IPR033010] (1)                                                                                   | -                               | -                            | P_trifoliata_00050_mRNA_47.1    |
| GF0044463 | 0                            | 0                         | 1                            | Hypothetical protein (1)                                                                      | fatty-acyl-CoA reductase (alcohol-forming) activity [GO:0008019 molecular_function] (1)                                                                                                                                                                                                                                                                                                                                                                                                  | Fatty acyl-CoA reductase [IPR026055] (1); Male sterility, NAD-binding [IPR013203] (1); NAD(P)-binding domain [IPR016040] (1)                                                                                                                                                                                         | -                               | -                            | P_trifoliata_00050_mRNA_16.1    |
| GF0044462 | 0                            | 0                         | 1                            | Hypothetical protein (1)                                                                      | 5-methyltetrahydropteroylglutamate-homocysteine S-methyltransferase activity [GO:0003671 molecular_function] (1); zinc ion binding [GO:0008270 molecular_function] (1); methionine biosynthetic process [GO:0009086 biological_process] (1)                                                                                                                                                                                                                                              | Cobalamin-independent methionine synthase MetE, C-terminal/archaeal [IPR02629] (1)                                                                                                                                                                                                                                   | -                               | -                            | P_trifoliata_00050_mRNA_109.1   |
| GF0044461 | 0                            | 0                         | 1                            | Hypothetical protein (1)                                                                      |                                                                                                                                                                                                                                                                                                                                                                                                                                                                                          |                                                                                                                                                                                                                                                                                                                      | -                               | -                            | P_trifoliata_00050_mRNA_107.1   |
| GF0044460 | 0                            | 0                         | 1                            | Hypothetical protein (1)                                                                      |                                                                                                                                                                                                                                                                                                                                                                                                                                                                                          |                                                                                                                                                                                                                                                                                                                      | -                               | -                            | P_trifoliata_00050_mRNA_1.1     |
| GF0044459 | 0                            | 0                         | 1                            | Hypothetical protein (1)                                                                      | FMN binding [GO:0010181 molecular_function] (1); oxidation-reduction process [GO:005514 biological_process] (1); oxidoreductase activity [GO:0016491 molecular_function] (1); catalytic activity [GO:0003824 molecular_function] (1)                                                                                                                                                                                                                                                     | NADH-flavin oxidoreductase/NADH oxidase, N-terminal [IPR001155] (1); Aldolase-type TIM barrel [IPR013785] (1)                                                                                                                                                                                                        | -                               | -                            | P_trifoliata_00049_mRNA_64.1    |
| GF0044458 | 0                            | 0                         | 1                            | Hypothetical protein (1)                                                                      |                                                                                                                                                                                                                                                                                                                                                                                                                                                                                          |                                                                                                                                                                                                                                                                                                                      | -                               | -                            | P_trifoliata_00049_mRNA_63.1    |
| GF0044457 | 0                            | 0                         | 1                            | Hypothetical protein (1)                                                                      |                                                                                                                                                                                                                                                                                                                                                                                                                                                                                          |                                                                                                                                                                                                                                                                                                                      | -                               | -                            | P_trifoliata_00049_mRNA_60.1    |
| GF0044456 | 0                            | 0                         | 1                            | Hypothetical protein (1)                                                                      |                                                                                                                                                                                                                                                                                                                                                                                                                                                                                          |                                                                                                                                                                                                                                                                                                                      | -                               | -                            | P_trifoliata_00049_mRNA_59.1    |
| GF0044455 | 0                            | 0                         | 1                            | Cation proton exchanger, putative (1)                                                         |                                                                                                                                                                                                                                                                                                                                                                                                                                                                                          | Retroviral aspartyl protease [IPR013242] (1); Retroviral-protein gag domain [IPR005162] (1)                                                                                                                                                                                                                          | -                               | -                            | P_trifoliata_00049_mRNA_55.1    |
| GF0044454 | 0                            | 0                         | 1                            | Hypothetical protein (1)                                                                      |                                                                                                                                                                                                                                                                                                                                                                                                                                                                                          |                                                                                                                                                                                                                                                                                                                      | -                               | -                            | P_trifoliata_00049_mRNA_49.1    |
| GF0044453 | 0                            | 0                         | 1                            | Hypothetical protein (1)                                                                      |                                                                                                                                                                                                                                                                                                                                                                                                                                                                                          |                                                                                                                                                                                                                                                                                                                      | -                               | -                            | P_trifoliata_00049_mRNA_37.1    |
| GF0044452 | 0                            | 0                         | 1                            | Hypothetical protein (1)                                                                      | response to oxidative stress [GO:0006979 biological_process] (1); heme binding [GO:0020037 molecular_function] (1); peroxidase activity [GO:0004601 molecular_function] (1); oxidation-reduction process [GO:005514 biological_process] (1); oxidation-reduction process [GO:005514 biological_process] (1); peroxidase activity [GO:0004601 molecular_function] (1); heme binding [GO:0020037 molecular_function] (1); response to oxidative stress [GO:0006979 biological_process] (1) | Haem peroxidase [IPR010255] (1); Haem peroxidase, plant/fungal/bacterial [IPR002016] (1); Plant peroxidase [IPR008023] (1); Peroxidases haem-ligand binding site [IPR019793] (1)                                                                                                                                     | -                               | -                            | P_trifoliata_00049_mRNA_36.1    |
| GF0044451 | 0                            | 0                         | 1                            | Hypothetical protein (1)                                                                      | oxidation-reduction process [GO:005514 biological_process] (1); peroxidase activity [GO:0004601 molecular_function] (1); heme binding [GO:0020037 molecular_function] (1); response to oxidative stress [GO:0006979 biological_process] (1)                                                                                                                                                                                                                                              | Plant peroxidase [IPR008023] (1); Haem peroxidase, plant/fungal/bacterial [IPR002016] (1); Haem peroxidase [IPR010255] (1)                                                                                                                                                                                           | -                               | -                            | P_trifoliata_00049_mRNA_35.1    |
| GF0044450 | 0                            | 0                         | 1                            | Hypothetical protein (1)                                                                      | oxidation-reduction process [GO:005514 biological_process] (1); oxidation-reduction process [GO:005514 biological_process] (1); peroxidase activity [GO:0004601 molecular_function] (1)                                                                                                                                                                                                                                                                                                  | Haem peroxidase [IPR010255] (1); Haem peroxidase, plant/fungal/bacterial [IPR002016] (1)                                                                                                                                                                                                                             | -                               | -                            | P_trifoliata_00049_mRNA_34.1    |
| GF0044449 | 0                            | 0                         | 1                            | Hypothetical protein (1)                                                                      |                                                                                                                                                                                                                                                                                                                                                                                                                                                                                          |                                                                                                                                                                                                                                                                                                                      | -                               | -                            | P_trifoliata_00049_mRNA_27.1    |

| ID       | Num. in <i>C. ciliata</i> | Num. in <i>C. unithi</i> | Num. in <i>P. trifoliata</i> | Note                                                          | GO                                                                                                                                                                                                                                                                                                                                                                                                                                | InterPro                                                                                                                                                          | Members in <i>C. ciliata</i> | Members in <i>C. unithi</i> | Members in <i>P. trifoliata</i> |                               |
|----------|---------------------------|--------------------------|------------------------------|---------------------------------------------------------------|-----------------------------------------------------------------------------------------------------------------------------------------------------------------------------------------------------------------------------------------------------------------------------------------------------------------------------------------------------------------------------------------------------------------------------------|-------------------------------------------------------------------------------------------------------------------------------------------------------------------|------------------------------|-----------------------------|---------------------------------|-------------------------------|
| GF004448 | 0                         | 0                        | 1                            | Hypothetical protein (1)                                      | oxidation-reduction process [GO:005114 biological_process] (1); peroxidase activity [GO:000461 molecular_function] (1); heme binding [GO:002003 molecular_function] (1); response to oxidative stress [GO:0006979 biological_process] (1)                                                                                                                                                                                         | Plant peroxidase [IPRO0823] (1); Peroxidase, active site [IPRO19794] (1); Haem peroxidase, plant/fungal/bacterial [IPRO2016] (1); Haem peroxidase [IPRO10255] (1) | -                            | -                           | P_trifoliata_00049_mRNA_26.1    |                               |
| GF004447 | 0                         | 0                        | 1                            | Hypothetical protein (1)                                      |                                                                                                                                                                                                                                                                                                                                                                                                                                   |                                                                                                                                                                   |                              |                             |                                 | P_trifoliata_00049_mRNA_19.1  |
| GF004446 | 0                         | 0                        | 1                            | Hypothetical protein (1)                                      |                                                                                                                                                                                                                                                                                                                                                                                                                                   | Domain of unknown function DUF641, plant [IPRO06943] (1)                                                                                                          |                              |                             |                                 | P_trifoliata_00049_mRNA_12.1  |
| GF004445 | 0                         | 0                        | 1                            | Hypothetical protein (1)                                      |                                                                                                                                                                                                                                                                                                                                                                                                                                   |                                                                                                                                                                   |                              |                             |                                 | P_trifoliata_00048_mRNA_9.1   |
| GF004444 | 0                         | 0                        | 1                            | Hypothetical protein (1)                                      |                                                                                                                                                                                                                                                                                                                                                                                                                                   |                                                                                                                                                                   |                              |                             |                                 | P_trifoliata_00048_mRNA_71.1  |
| GF004443 | 0                         | 0                        | 1                            | Hypothetical protein (1)                                      |                                                                                                                                                                                                                                                                                                                                                                                                                                   |                                                                                                                                                                   |                              |                             |                                 | P_trifoliata_00048_mRNA_69.1  |
| GF004442 | 0                         | 0                        | 1                            | Hypothetical protein (1)                                      |                                                                                                                                                                                                                                                                                                                                                                                                                                   |                                                                                                                                                                   |                              |                             |                                 | P_trifoliata_00048_mRNA_65.1  |
| GF004441 | 0                         | 0                        | 1                            | Hypothetical protein (1)                                      |                                                                                                                                                                                                                                                                                                                                                                                                                                   |                                                                                                                                                                   |                              |                             |                                 | P_trifoliata_00048_mRNA_62.1  |
| GF004440 | 0                         | 0                        | 1                            | Hypothetical protein (1)                                      |                                                                                                                                                                                                                                                                                                                                                                                                                                   |                                                                                                                                                                   |                              |                             |                                 | P_trifoliata_00048_mRNA_60.1  |
| GF004439 | 0                         | 0                        | 1                            | Hypothetical protein (1)                                      |                                                                                                                                                                                                                                                                                                                                                                                                                                   |                                                                                                                                                                   |                              |                             |                                 | P_trifoliata_00048_mRNA_58.1  |
| GF004438 | 0                         | 0                        | 1                            | Hypothetical protein (1)                                      | oxidation-reduction process [GO:005114 biological_process] (1); oxidoreductase activity, acting on paired donors, with incorporation or reduction of molecular oxygen [GO:0016705 molecular_function] (1); heme binding [GO:002003 molecular_function] (1); iron ion binding [GO:0005506 molecular_function] (1)                                                                                                                  | Cytochrome P450 [IPRO01128] (1); Reverse transcriptase domain [IPRO09477] (1)                                                                                     |                              |                             |                                 | P_trifoliata_00048_mRNA_57.1  |
| GF004437 | 0                         | 0                        | 1                            | Hypothetical protein (1)                                      |                                                                                                                                                                                                                                                                                                                                                                                                                                   |                                                                                                                                                                   |                              |                             |                                 | P_trifoliata_00048_mRNA_56.1  |
| GF004436 | 0                         | 0                        | 1                            | Hypothetical protein (1)                                      |                                                                                                                                                                                                                                                                                                                                                                                                                                   |                                                                                                                                                                   |                              |                             |                                 | P_trifoliata_00048_mRNA_53.1  |
| GF004435 | 0                         | 0                        | 1                            | Hypothetical protein (1)                                      |                                                                                                                                                                                                                                                                                                                                                                                                                                   |                                                                                                                                                                   |                              |                             |                                 | P_trifoliata_00048_mRNA_52.1  |
| GF004434 | 0                         | 0                        | 1                            | Hypothetical protein (1)                                      | nucleic acid binding [GO:0003676 molecular_function] (1)                                                                                                                                                                                                                                                                                                                                                                          | Domain of unknown function DUF4283 [IPRO25558] (1); Ribonuclease H-like domain [IPRO12337] (1); Reverse transcriptase zinc-binding domain [IPRO26960] (1)         |                              |                             |                                 | P_trifoliata_00048_mRNA_49.1  |
| GF004433 | 0                         | 0                        | 1                            | Hypothetical protein (1)                                      |                                                                                                                                                                                                                                                                                                                                                                                                                                   |                                                                                                                                                                   |                              |                             |                                 | P_trifoliata_00048_mRNA_41.1  |
| GF004432 | 0                         | 0                        | 1                            | Hypothetical protein (1)                                      |                                                                                                                                                                                                                                                                                                                                                                                                                                   |                                                                                                                                                                   |                              |                             |                                 | P_trifoliata_00048_mRNA_4.1   |
| GF004431 | 0                         | 0                        | 1                            | Hypothetical protein (1)                                      |                                                                                                                                                                                                                                                                                                                                                                                                                                   | Reverse transcriptase zinc-binding domain [IPRO26960] (1)                                                                                                         |                              |                             |                                 | P_trifoliata_00048_mRNA_34.1  |
| GF004430 | 0                         | 0                        | 1                            | Hypothetical protein (1)                                      |                                                                                                                                                                                                                                                                                                                                                                                                                                   |                                                                                                                                                                   |                              |                             |                                 | P_trifoliata_00048_mRNA_30.1  |
| GF004429 | 0                         | 0                        | 1                            | Hypothetical protein (1)                                      |                                                                                                                                                                                                                                                                                                                                                                                                                                   |                                                                                                                                                                   |                              |                             |                                 | P_trifoliata_00048_mRNA_28.1  |
| GF004428 | 0                         | 0                        | 1                            | UDP-arabinopyranose mutase 1 (1)                              | intramolecular transferase activity [GO:001886 molecular_function] (1); cellulose biosynthetic process [GO:0030244 biological_process] (1)                                                                                                                                                                                                                                                                                        | Reversibly glycosylated polypeptide family [IPRO04901] (1)                                                                                                        |                              |                             |                                 | P_trifoliata_00048_mRNA_22.1  |
| GF004427 | 0                         | 0                        | 1                            | Hypothetical protein (1)                                      |                                                                                                                                                                                                                                                                                                                                                                                                                                   |                                                                                                                                                                   |                              |                             |                                 | P_trifoliata_00048_mRNA_19.1  |
| GF004426 | 0                         | 0                        | 1                            | Hypothetical protein (1)                                      |                                                                                                                                                                                                                                                                                                                                                                                                                                   |                                                                                                                                                                   |                              |                             |                                 | P_trifoliata_00048_mRNA_18.1  |
| GF004425 | 0                         | 0                        | 1                            | Hypothetical protein (1)                                      |                                                                                                                                                                                                                                                                                                                                                                                                                                   |                                                                                                                                                                   |                              |                             |                                 | P_trifoliata_00048_mRNA_10.1  |
| GF004424 | 0                         | 0                        | 1                            | Hypothetical protein (1)                                      |                                                                                                                                                                                                                                                                                                                                                                                                                                   |                                                                                                                                                                   |                              |                             |                                 | P_trifoliata_00047_mRNA_99.1  |
| GF004423 | 0                         | 0                        | 1                            | Hypothetical protein (1)                                      |                                                                                                                                                                                                                                                                                                                                                                                                                                   |                                                                                                                                                                   |                              |                             |                                 | P_trifoliata_00047_mRNA_88.1  |
| GF004422 | 0                         | 0                        | 1                            | Hypothetical protein (1)                                      |                                                                                                                                                                                                                                                                                                                                                                                                                                   |                                                                                                                                                                   |                              |                             |                                 | P_trifoliata_00047_mRNA_84.1  |
| GF004421 | 0                         | 0                        | 1                            | Phosphatase 2C family protein (1)                             | catalytic activity [GO:0003824 molecular_function] (1); cation binding [GO:0043169 molecular_function] (1); protein dephosphorylation [GO:0006470 biological_process] (1); protein serine/threonine phosphatase activity [GO:0004722 molecular_function] (1)                                                                                                                                                                      | PPM-type phosphatase, divalent cation binding [IPRO00222] (1); Protein phosphatase 2C family [IPRO15655] (1); PPM-type phosphatase domain [IPRO01932] (1)         |                              |                             |                                 | P_trifoliata_00047_mRNA_81.1  |
| GF004420 | 0                         | 0                        | 1                            | Hypothetical protein (1)                                      |                                                                                                                                                                                                                                                                                                                                                                                                                                   |                                                                                                                                                                   |                              |                             |                                 | P_trifoliata_00047_mRNA_68.1  |
| GF004419 | 0                         | 0                        | 1                            | 60S ribosomal protein L39 (1)                                 | translation [GO:0006412 biological_process] (1); intracellular [GO:0005622 cellular_component] (1); structural constituent of ribosome [GO:000735 molecular_function] (1); ribosome [GO:0005840 cellular_component] (1)                                                                                                                                                                                                           | Ribosomal protein L39e domain [IPRO23626] (1); Ribosomal protein L39e [IPRO00777] (1); Ribosomal protein L39e, conserved site [IPRO20083] (1)                     |                              |                             |                                 | P_trifoliata_00047_mRNA_56.1  |
| GF004418 | 0                         | 0                        | 1                            | Hypothetical protein (1)                                      |                                                                                                                                                                                                                                                                                                                                                                                                                                   |                                                                                                                                                                   |                              |                             |                                 | P_trifoliata_00047_mRNA_39.1  |
| GF004417 | 0                         | 0                        | 1                            | Shikimate/quininate hydroxycinnamoyltransferase (1)           | transferase activity, transferring acyl groups other than amino-acyl groups [GO:0016747 molecular_function] (1)                                                                                                                                                                                                                                                                                                                   | Transferase [IPRO03480] (1); Chloramphenicol acetyltransferase-like domain [IPRO23213] (1)                                                                        |                              |                             |                                 | P_trifoliata_00047_mRNA_3.1   |
| GF004416 | 0                         | 0                        | 1                            | Hypothetical protein (1)                                      |                                                                                                                                                                                                                                                                                                                                                                                                                                   |                                                                                                                                                                   |                              |                             |                                 | P_trifoliata_00047_mRNA_120.1 |
| GF004415 | 0                         | 0                        | 1                            | Hypothetical protein (1)                                      | gamma-glutamyltransferase activity [GO:0005840 molecular_function] (1); glutathione metabolic process [GO:0006749 biological_process] (1)                                                                                                                                                                                                                                                                                         | Gamma-glutamyltransferase [IPRO00101] (1); Nucleophilic aminohydrolases, N-terminal [IPRO29052] (1)                                                               |                              |                             |                                 | P_trifoliata_00047_mRNA_116.1 |
| GF004414 | 0                         | 0                        | 1                            | Hypothetical protein (1)                                      |                                                                                                                                                                                                                                                                                                                                                                                                                                   |                                                                                                                                                                   |                              |                             |                                 | P_trifoliata_00047_mRNA_115.1 |
| GF004413 | 0                         | 0                        | 1                            | Hypothetical protein (1)                                      |                                                                                                                                                                                                                                                                                                                                                                                                                                   | Domain of unknown function DUF4220 [IPRO25151] (1)                                                                                                                |                              |                             |                                 | P_trifoliata_00047_mRNA_112.1 |
| GF004412 | 0                         | 0                        | 1                            | Retrotransposon protein, putative, Ty3-gypsy subclass (1)     | RNA-DNA hybrid ribonuclease activity [GO:0006523 molecular_function] (1); nucleic acid binding [GO:0003676 molecular_function] (1)                                                                                                                                                                                                                                                                                                | Ribonuclease H domain [IPRO02156] (1); Ribonuclease H-like domain [IPRO12337] (1)                                                                                 |                              |                             |                                 | P_trifoliata_00047_mRNA_107.1 |
| GF004411 | 0                         | 0                        | 1                            | Hypothetical protein (1)                                      |                                                                                                                                                                                                                                                                                                                                                                                                                                   |                                                                                                                                                                   |                              |                             |                                 | P_trifoliata_00047_mRNA_105.1 |
| GF004410 | 0                         | 0                        | 1                            | Hypothetical protein (1)                                      |                                                                                                                                                                                                                                                                                                                                                                                                                                   |                                                                                                                                                                   |                              |                             |                                 | P_trifoliata_00047_mRNA_104.1 |
| GF004409 | 0                         | 0                        | 1                            | Hypothetical protein (1)                                      |                                                                                                                                                                                                                                                                                                                                                                                                                                   |                                                                                                                                                                   |                              |                             |                                 | P_trifoliata_00047_mRNA_102.1 |
| GF004408 | 0                         | 0                        | 1                            | Hypothetical protein (1)                                      |                                                                                                                                                                                                                                                                                                                                                                                                                                   |                                                                                                                                                                   |                              |                             |                                 | P_trifoliata_00047_mRNA_101.1 |
| GF004407 | 0                         | 0                        | 1                            | Hypothetical protein (1)                                      |                                                                                                                                                                                                                                                                                                                                                                                                                                   |                                                                                                                                                                   |                              |                             |                                 | P_trifoliata_00047_mRNA_100.1 |
| GF004406 | 0                         | 0                        | 1                            | shikimate/quininate hydroxycinnamoyltransferase (1)           | transferase activity, transferring acyl groups other than amino-acyl groups [GO:0016747 molecular_function] (1); transmembrane transport [GO:005085 biological_process] (1); drug transmembrane transport [GO:0006855 biological_process] (1); membrane [GO:0016020 cellular_component] (1); drug transmembrane transporter activity [GO:0015238 molecular_function] (1); antiporter activity [GO:0015297 molecular_function] (1) | Chloramphenicol acetyltransferase-like domain [IPRO23213] (1); Transferase [IPRO03480] (1)                                                                        |                              |                             |                                 | P_trifoliata_00047_mRNA_1.1   |
| GF004405 | 0                         | 0                        | 1                            | MATE efflux family protein 9 (1)                              | transmembrane transport [GO:005085 biological_process] (1); drug transmembrane transport [GO:0006855 biological_process] (1); membrane [GO:0016020 cellular_component] (1); drug transmembrane transporter activity [GO:0015238 molecular_function] (1); antiporter activity [GO:0015297 molecular_function] (1)                                                                                                                  | Multi antimicrobial extrusion protein [IPRO02528] (1)                                                                                                             |                              |                             |                                 | P_trifoliata_00046_mRNA_98.1  |
| GF004404 | 0                         | 0                        | 1                            | Putative AC9 transposase (1)                                  | protein dimerization activity [GO:0046983 molecular_function] (1); nucleic acid binding [GO:0003676 molecular_function] (1)                                                                                                                                                                                                                                                                                                       | Ribonuclease H-like domain [IPRO12337] (1); HAT, C-terminal dimerisation domain [IPRO08906] (1)                                                                   |                              |                             |                                 | P_trifoliata_00046_mRNA_8.1   |
| GF004403 | 0                         | 0                        | 1                            | Farnesylated protein 2 (1)                                    | metal ion binding [GO:0046872 molecular_function] (1); metal ion transport [GO:0030001 biological_process] (1)                                                                                                                                                                                                                                                                                                                    | Heavy metal-associated domain, HMA [IPRO06121] (1)                                                                                                                |                              |                             |                                 | P_trifoliata_00046_mRNA_73.1  |
| GF004402 | 0                         | 0                        | 1                            | Spore coat protein A (1)                                      | oxidation-reduction process [GO:005114 biological_process] (1); oxidoreductase activity [GO:0016490 molecular_function] (1); copper ion binding [GO:0005507 molecular_function] (1)                                                                                                                                                                                                                                               | Cupredoxin [IPRO00972] (1); Multicopper oxidase, type 1 [IPRO01117] (1); Multicopper oxidase, type 3 [IPRO11707] (1)                                              |                              |                             |                                 | P_trifoliata_00046_mRNA_70.1  |
| GF004401 | 0                         | 0                        | 1                            | Retrotransposon protein, putative, unclassified (1)           |                                                                                                                                                                                                                                                                                                                                                                                                                                   |                                                                                                                                                                   |                              |                             |                                 | P_trifoliata_00046_mRNA_7.1   |
| GF004400 | 0                         | 0                        | 1                            | Hypothetical protein (1)                                      |                                                                                                                                                                                                                                                                                                                                                                                                                                   |                                                                                                                                                                   |                              |                             |                                 | P_trifoliata_00046_mRNA_67.1  |
| GF004399 | 0                         | 0                        | 1                            | Hypothetical protein (1)                                      | zinc ion binding [GO:0008270 molecular_function] (1); nucleic acid binding [GO:0003676 molecular_function] (1)                                                                                                                                                                                                                                                                                                                    | Zinc knuckle C2C2CXHX4C [IPRO25836] (1); Zinc finger, CCHC-type [IPRO1878] (1)                                                                                    |                              |                             |                                 | P_trifoliata_00046_mRNA_48.1  |
| GF004398 | 0                         | 0                        | 1                            | Hypothetical protein (1)                                      |                                                                                                                                                                                                                                                                                                                                                                                                                                   | Endonuclease/cytoskeleton/phosphatase [IPRO05135] (1)                                                                                                             |                              |                             |                                 | P_trifoliata_00046_mRNA_47.1  |
| GF004397 | 0                         | 0                        | 1                            | Hypothetical protein (1)                                      | binding [GO:0005488 molecular_function] (1)                                                                                                                                                                                                                                                                                                                                                                                       | Armadillo-type fold [IPRO16024] (1); Armadillo-like helical [IPRO11989] (1)                                                                                       |                              |                             |                                 | P_trifoliata_00046_mRNA_19.1  |
| GF004396 | 0                         | 0                        | 1                            | Hypothetical protein (1)                                      |                                                                                                                                                                                                                                                                                                                                                                                                                                   | Chromo domain [IPRO23780] (1); Chromo domain-like [IPRO16197] (1); Chromo/chromo shadow domain [IPRO00953] (1)                                                    |                              |                             |                                 | P_trifoliata_00046_mRNA_111.1 |
| GF004395 | 0                         | 0                        | 1                            | CDNA clone:J02302E20, full insert sequence (1)                |                                                                                                                                                                                                                                                                                                                                                                                                                                   |                                                                                                                                                                   |                              |                             |                                 | P_trifoliata_00046_mRNA_109.1 |
| GF004394 | 0                         | 0                        | 1                            | Hypothetical protein (1)                                      |                                                                                                                                                                                                                                                                                                                                                                                                                                   |                                                                                                                                                                   |                              |                             |                                 | P_trifoliata_00046_mRNA_108.1 |
| GF004393 | 0                         | 0                        | 1                            | Chloroplast acyl-ACP thioesterase A (1)                       | fatty acid biosynthetic process [GO:0006433 biological_process] (1); thiolester hydrolase activity [GO:0016790 molecular_function] (1)                                                                                                                                                                                                                                                                                            | Acyl-ACP thioesterase [IPRO02864] (1); HotDog domain [IPRO29069] (1)                                                                                              |                              |                             |                                 | P_trifoliata_00046_mRNA_102.1 |
| GF004392 | 0                         | 0                        | 1                            | Hypothetical protein (1)                                      |                                                                                                                                                                                                                                                                                                                                                                                                                                   |                                                                                                                                                                   |                              |                             |                                 | P_trifoliata_00046_mRNA_10.1  |
| GF004391 | 0                         | 0                        | 1                            | Hypothetical protein (1)                                      |                                                                                                                                                                                                                                                                                                                                                                                                                                   |                                                                                                                                                                   |                              |                             |                                 | P_trifoliata_00045_mRNA_94.1  |
| GF004390 | 0                         | 0                        | 1                            | Hypothetical protein (1)                                      |                                                                                                                                                                                                                                                                                                                                                                                                                                   |                                                                                                                                                                   |                              |                             |                                 | P_trifoliata_00045_mRNA_92.1  |
| GF004389 | 0                         | 0                        | 1                            | Hypothetical protein (1)                                      |                                                                                                                                                                                                                                                                                                                                                                                                                                   |                                                                                                                                                                   |                              |                             |                                 | P_trifoliata_00045_mRNA_91.1  |
| GF004388 | 0                         | 0                        | 1                            | Hypothetical protein (1)                                      |                                                                                                                                                                                                                                                                                                                                                                                                                                   |                                                                                                                                                                   |                              |                             |                                 | P_trifoliata_00045_mRNA_90.1  |
| GF004387 | 0                         | 0                        | 1                            | Hypothetical protein (1)                                      |                                                                                                                                                                                                                                                                                                                                                                                                                                   | MEKILA [IPRO13978] (1)                                                                                                                                            |                              |                             |                                 | P_trifoliata_00045_mRNA_77.1  |
| GF004386 | 0                         | 0                        | 1                            | Photosystem I reaction center subunit psak, chloroplastic (1) | chlorophyll binding [GO:0016168 molecular_function] (1); photosynthesis [GO:0015979 biological_process] (1); membrane [GO:0016020 cellular_component] (1); photosystem I [GO:0009522 cellular_component] (1)                                                                                                                                                                                                                      | Photosystem I Psak, reaction centre, plant [IPRO17493] (1); Photosystem I Psak/Psak protein [IPRO0549] (1); Photosystem I Psak/Psak domain [IPRO25618] (1)        |                              |                             |                                 | P_trifoliata_00045_mRNA_68.1  |

| ID        | Num. in <i>C. clementiae</i> | Num. in <i>C. unshii</i> | Num. in <i>P. trifoliata</i> | Note                                                                  | GO                                                                                                                                                                                                                                                                                                   | InterPro                                                                                                                                                                                                                                                                                                                                                                                                                                                                              | Members in <i>C. clementiae</i> | Members in <i>C. unshii</i> | Members in <i>P. trifoliata</i> |
|-----------|------------------------------|--------------------------|------------------------------|-----------------------------------------------------------------------|------------------------------------------------------------------------------------------------------------------------------------------------------------------------------------------------------------------------------------------------------------------------------------------------------|---------------------------------------------------------------------------------------------------------------------------------------------------------------------------------------------------------------------------------------------------------------------------------------------------------------------------------------------------------------------------------------------------------------------------------------------------------------------------------------|---------------------------------|-----------------------------|---------------------------------|
| GF0044385 | 0                            | 0                        | 1                            | Hypothetical protein (1)                                              | extracellular matrix [GO:0031012]<br>cellular_component (1); proteolysis [GO:006508 biological_process (1)]; metalloproteinase activity [GO:0008237 molecular_function (1)]; zinc ion binding [GO:0008270 molecular_function (1)]; metalloendopeptidase activity [GO:0004222 molecular_function (1)] | Peptidase M10, metalloproteinase [IPR01818] (1); Peptidase, metalloproteinase [IPR006026] (1); Peptidase M10A [IPR021190] (1); Metalloproteinase, catalytic domain [IPR024079] (1)                                                                                                                                                                                                                                                                                                    | -                               | -                           | P_trifoliata_00045_mRNA_67.1    |
| GF0044384 | 0                            | 0                        | 1                            | Hypothetical protein (1)                                              | metalloproteinase activity [GO:0008237 molecular_function (1)]; proteolysis [GO:006508 biological_process (1)]; extracellular matrix [GO:0031012 cellular_component (1)]; metalloendopeptidase activity [GO:0004222 molecular_function (1)]; zinc ion binding [GO:0008270 molecular_function (1)]    | Peptidase M10, metalloproteinase [IPR01818] (1); Metalloproteinase, catalytic domain [IPR024079] (1); Peptidase M10A [IPR021190] (1); Peptidase, metalloproteinase [IPR006026] (1)                                                                                                                                                                                                                                                                                                    | -                               | -                           | P_trifoliata_00045_mRNA_66.1    |
| GF0044383 | 0                            | 0                        | 1                            | Hypothetical protein (1)                                              | extracellular matrix [GO:0031012 cellular_component (1)]; metalloendopeptidase activity [GO:0004222 molecular_function (1)]; zinc ion binding [GO:0008270 molecular_function (1)]                                                                                                                    | Peptidase M10, metalloproteinase [IPR01818] (1); Metalloproteinase, catalytic domain [IPR024079] (1); Peptidase M10A [IPR021190] (1); Peptidase, metalloproteinase [IPR006026] (1)                                                                                                                                                                                                                                                                                                    | -                               | -                           | P_trifoliata_00045_mRNA_65.1    |
| GF0044382 | 0                            | 0                        | 1                            | Hypothetical protein (1)                                              | zinc ion binding [GO:0008270 molecular_function (1)]                                                                                                                                                                                                                                                 | Alpha/Beta hydrolase fold [IPR029058] (1)                                                                                                                                                                                                                                                                                                                                                                                                                                             | -                               | -                           | P_trifoliata_00045_mRNA_51.1    |
| GF0044381 | 0                            | 0                        | 1                            | Hypothetical protein (1)                                              | protein binding [GO:0005515 molecular_function (1)]; zinc ion binding [GO:0008270 molecular_function (1)]; metal ion binding [GO:0048872 molecular_function (1)]                                                                                                                                     | Zinc finger, RING-type [IPR018441] (1); Pentatricopeptide repeat [IPR002885] (1); Zinc finger, RING-type, conserved site [IPR017907] (1); Zinc finger, C2HC2 RING-type [IPR018957] (1); Zinc finger, RING/YVE/PHD-type [IPR13083] (1)                                                                                                                                                                                                                                                 | -                               | -                           | P_trifoliata_00045_mRNA_46.1    |
| GF0044380 | 0                            | 0                        | 1                            | Hypothetical protein (1)                                              | protein kinase activity [GO:0004672 molecular_function (1)]; protein phosphorylation [GO:0006468 molecular_function (1)]; ATP binding [GO:0005524 molecular_function (1)]                                                                                                                            | Serine/threonine/dual specificity protein kinase, catalytic domain [IPR02290] (1); Protein kinase, ATP binding site [IPR017441] (1); Serine/threonine-protein kinase, active site [IPR008271] (1); Protein kinase-like domain [IPR011009] (1); Protein kinase domain [IPR000719] (1)                                                                                                                                                                                                  | -                               | -                           | P_trifoliata_00045_mRNA_39.1    |
| GF0044379 | 0                            | 0                        | 1                            | CHL-interacting protein kinase 3 isoform 2 (1)                        | protein kinase activity [GO:0004672 molecular_function (1)]; protein phosphorylation [GO:0006468 molecular_function (1)]; ATP binding [GO:0005524 molecular_function (1)]                                                                                                                            | Serine/threonine/dual specificity protein kinase, catalytic domain [IPR02290] (1); Protein kinase, ATP binding site [IPR017441] (1); Serine/threonine-protein kinase, active site [IPR008271] (1); Protein kinase-like domain [IPR011009] (1); Protein kinase domain [IPR000719] (1)                                                                                                                                                                                                  | -                               | -                           | P_trifoliata_00045_mRNA_38.1    |
| GF0044378 | 0                            | 0                        | 1                            | Hypothetical protein (1)                                              | cell redox homeostasis [GO:004544 biological_process (1)]; electron carrier activity [GO:0009055 molecular_function (1)]; protein disulfide oxidoreductase activity [GO:0015035 molecular_function (1)]                                                                                              | Thioredoxin-like fold [IPR012336] (1); Glutaredoxin-like, plant I [IPR011905] (1); Glutaredoxin subunit [IPR014025] (1)                                                                                                                                                                                                                                                                                                                                                               | -                               | -                           | P_trifoliata_00045_mRNA_29.1    |
| GF0044377 | 0                            | 0                        | 1                            | glutaredoxin subgroup III (1)                                         | cell redox homeostasis [GO:004544 biological_process (1)]; electron carrier activity [GO:0009055 molecular_function (1)]; protein disulfide oxidoreductase activity [GO:0015035 molecular_function (1)]                                                                                              | Thioredoxin-like fold [IPR012336] (1); Glutaredoxin-like, plant I [IPR011905] (1); Glutaredoxin subunit [IPR014025] (1)                                                                                                                                                                                                                                                                                                                                                               | -                               | -                           | P_trifoliata_00045_mRNA_27.1    |
| GF0044376 | 0                            | 0                        | 1                            | Hypothetical protein (1)                                              |                                                                                                                                                                                                                                                                                                      |                                                                                                                                                                                                                                                                                                                                                                                                                                                                                       | -                               | -                           | P_trifoliata_00045_mRNA_26.1    |
| GF0044375 | 0                            | 0                        | 1                            | Hypothetical protein (1)                                              |                                                                                                                                                                                                                                                                                                      |                                                                                                                                                                                                                                                                                                                                                                                                                                                                                       | -                               | -                           | P_trifoliata_00045_mRNA_2.1     |
| GF0044374 | 0                            | 0                        | 1                            | O-methyltransferase ZRP4 (1)                                          | methyltransferase activity [GO:0008168 molecular_function (1)]; O-methyltransferase activity [GO:0008171 molecular_function (1)]                                                                                                                                                                     | Winged helix-turn-helix DNA-binding domain [IPR011911] (1); O-methyltransferase, family 2 [IPR001077] (1); O-methyltransferase COMT-type [IPR016461] (1); S-adenosyl-L-methionine-dependent methyltransferase [IPR029063] (1)                                                                                                                                                                                                                                                         | -                               | -                           | P_trifoliata_00045_mRNA_128.1   |
| GF0044373 | 0                            | 0                        | 1                            | Orcinol O-methyltransferase (1)                                       | methyltransferase activity [GO:0008168 molecular_function (1)]; O-methyltransferase activity [GO:0008171 molecular_function (1)]; protein dimerization activity [GO:0046983 molecular_function (1)]                                                                                                  | O-methyltransferase COMT-type [IPR016461] (1); Plant methyltransferase dimerization [IPR012967] (1); O-methyltransferase, family 2 [IPR001077] (1); Winged helix-turn-helix DNA-binding domain [IPR011911] (1); S-adenosyl-L-methionine-dependent methyltransferase [IPR029063] (1)                                                                                                                                                                                                   | -                               | -                           | P_trifoliata_00045_mRNA_126.1   |
| GF0044372 | 0                            | 0                        | 1                            | Phosphatase 2C family protein (1)                                     | protein dephosphorylation [GO:0006470 biological_process (1)]; catalytic activity [GO:0003824 molecular_function (1)]; protein serine/threonine phosphatase activity [GO:0004722 molecular_function (1)]                                                                                             | Ran/Cdc122 jelly roll fold [IPR014710] (1); PPM-type phosphatase domain [IPR001932] (1); Protein phosphatase 2C family [IPR015655] (1)                                                                                                                                                                                                                                                                                                                                                | -                               | -                           | P_trifoliata_00045_mRNA_115.1   |
| GF0044371 | 0                            | 0                        | 1                            | Receptor-like protein kinase FERONIA (1)                              | ATP binding [GO:0005524 molecular_function (1)]; protein phosphorylation [GO:0006468 biological_process (1)]; protein kinase activity [GO:0004672 molecular_function (1)]                                                                                                                            | Protein kinase-like domain [IPR011009] (1); Concavalin A-like lectin/glycanase domain [IPR013200] (1); Malerin-like carbohydrate-binding domain [IPR024788] (1); Protein kinase domain [IPR007175] (1); Serine/threonine/tyrosine-protein kinase catalytic domain [IPR012454] (1); Protein kinase, ATP binding site [IPR017441] (1); Serine/threonine-protein kinase, active site [IPR008271] (1); Serine/threonine/dual specificity protein kinase, catalytic domain [IPR002290] (1) | -                               | -                           | P_trifoliata_00045_mRNA_109.1   |
| GF0044370 | 0                            | 0                        | 1                            | Hypothetical protein (1)                                              |                                                                                                                                                                                                                                                                                                      |                                                                                                                                                                                                                                                                                                                                                                                                                                                                                       | -                               | -                           | P_trifoliata_00045_mRNA_108.1   |
| GF0044369 | 0                            | 0                        | 1                            | Hypothetical protein (1)                                              |                                                                                                                                                                                                                                                                                                      |                                                                                                                                                                                                                                                                                                                                                                                                                                                                                       | -                               | -                           | P_trifoliata_00045_mRNA_106.1   |
| GF0044368 | 0                            | 0                        | 1                            | Hypothetical protein (1)                                              |                                                                                                                                                                                                                                                                                                      |                                                                                                                                                                                                                                                                                                                                                                                                                                                                                       | -                               | -                           | P_trifoliata_00045_mRNA_102.1   |
| GF0044367 | 0                            | 0                        | 1                            | Reverse transcriptase, related (1)                                    |                                                                                                                                                                                                                                                                                                      |                                                                                                                                                                                                                                                                                                                                                                                                                                                                                       | -                               | -                           | P_trifoliata_00044_mRNA_9.1     |
| GF0044366 | 0                            | 0                        | 1                            | Hypothetical protein (1)                                              |                                                                                                                                                                                                                                                                                                      |                                                                                                                                                                                                                                                                                                                                                                                                                                                                                       | -                               | -                           | P_trifoliata_00044_mRNA_8.1     |
| GF0044365 | 0                            | 0                        | 1                            | Isoflavone reductase (1)                                              |                                                                                                                                                                                                                                                                                                      |                                                                                                                                                                                                                                                                                                                                                                                                                                                                                       | -                               | -                           | P_trifoliata_00044_mRNA_67.1    |
| GF0044364 | 0                            | 0                        | 1                            | Hypothetical protein (1)                                              |                                                                                                                                                                                                                                                                                                      |                                                                                                                                                                                                                                                                                                                                                                                                                                                                                       | -                               | -                           | P_trifoliata_00044_mRNA_66.1    |
| GF0044363 | 0                            | 0                        | 1                            | COBW domain-containing protein 1 (1)                                  |                                                                                                                                                                                                                                                                                                      |                                                                                                                                                                                                                                                                                                                                                                                                                                                                                       | -                               | -                           | P_trifoliata_00044_mRNA_63.1    |
| GF0044362 | 0                            | 0                        | 1                            | Hypothetical protein (1)                                              | methyltransferase activity [GO:0008168 molecular_function (1)]                                                                                                                                                                                                                                       | C-S cytosine methyltransferase [IPR01525] (1); S-adenosyl-L-methionine-dependent methyltransferase [IPR029063] (1)                                                                                                                                                                                                                                                                                                                                                                    | -                               | -                           | P_trifoliata_00044_mRNA_62.1    |
| GF0044361 | 0                            | 0                        | 1                            | Hypothetical protein (1)                                              | oxidoreductase activity [GO:0016491 molecular_function (1)]; oxidation-reduction process [GO:0055114 biological_process (1)]                                                                                                                                                                         | OTU domain [IPR003323] (1); Aldehyde oxidase/xanthine dehydrogenase, molybdopterin binding [IPR008274] (1)                                                                                                                                                                                                                                                                                                                                                                            | -                               | -                           | P_trifoliata_00044_mRNA_60.1    |
| GF0044360 | 0                            | 0                        | 1                            | Hypothetical protein (1)                                              |                                                                                                                                                                                                                                                                                                      |                                                                                                                                                                                                                                                                                                                                                                                                                                                                                       | -                               | -                           | P_trifoliata_00044_mRNA_52.1    |
| GF0044359 | 0                            | 0                        | 1                            | Hypothetical protein (1)                                              | protein binding [GO:0005515 molecular_function (1)]                                                                                                                                                                                                                                                  | F-box domain [IPR018110] (1); Leucine-rich repeat domain, L domain-like [IPR032675] (1)                                                                                                                                                                                                                                                                                                                                                                                               | -                               | -                           | P_trifoliata_00044_mRNA_47.1    |
| GF0044358 | 0                            | 0                        | 1                            | Hypothetical protein (1)                                              |                                                                                                                                                                                                                                                                                                      |                                                                                                                                                                                                                                                                                                                                                                                                                                                                                       | -                               | -                           | P_trifoliata_00044_mRNA_41.1    |
| GF0044357 | 0                            | 0                        | 1                            | Calcium-transporting ATPase 9, plasma membrane-type protein (1)       |                                                                                                                                                                                                                                                                                                      |                                                                                                                                                                                                                                                                                                                                                                                                                                                                                       | -                               | -                           | P_trifoliata_00044_mRNA_38.1    |
| GF0044356 | 0                            | 0                        | 1                            | Putative calcium-transporting ATPase 9, plasma membrane-type-like (1) | nucleotide binding [GO:0000166 molecular_function (1)]; metal ion binding [GO:0046872 molecular_function (1)]; integral component of membrane [GO:0016021 cellular_component (1)]                                                                                                                    | Cation-transporting P-type ATPase, C-terminal [IPR060608] (1); P-type ATPase, transmembrane domain [IPR023298] (1); P-type ATPase [IPR001757] (1); P-type ATPase, transmembrane domain [IPR023298] (1); P-type ATPase, cytoplasmic domain N [IPR023299] (1); P-type ATPase, phosphorylation site [IPR018303] (1); P-type ATPase, A domain [IPR008293] (1); Cation-transporting P-type ATPase, N-terminal [IPR04014] (1)                                                               | -                               | -                           | P_trifoliata_00044_mRNA_37.1    |
| GF0044355 | 0                            | 0                        | 1                            | Hypothetical protein (1)                                              |                                                                                                                                                                                                                                                                                                      |                                                                                                                                                                                                                                                                                                                                                                                                                                                                                       | -                               | -                           | P_trifoliata_00044_mRNA_36.1    |
| GF0044354 | 0                            | 0                        | 1                            | Hypothetical protein (1)                                              |                                                                                                                                                                                                                                                                                                      |                                                                                                                                                                                                                                                                                                                                                                                                                                                                                       | -                               | -                           | P_trifoliata_00044_mRNA_35.1    |
| GF0044353 | 0                            | 0                        | 1                            | Hypothetical protein (1)                                              |                                                                                                                                                                                                                                                                                                      |                                                                                                                                                                                                                                                                                                                                                                                                                                                                                       | -                               | -                           | P_trifoliata_00044_mRNA_32.1    |
| GF0044352 | 0                            | 0                        | 1                            | Pentatricopeptide (PPR) repeat protein (1)                            | protein binding [GO:0005515 molecular_function (1)]                                                                                                                                                                                                                                                  | Pentatricopeptide repeat [IPR002885] (1); Triantropicopeptide-like helical domain [IPR011990] (1)                                                                                                                                                                                                                                                                                                                                                                                     | -                               | -                           | P_trifoliata_00044_mRNA_3.1     |
| GF0044351 | 0                            | 0                        | 1                            | Hypothetical protein (1)                                              |                                                                                                                                                                                                                                                                                                      |                                                                                                                                                                                                                                                                                                                                                                                                                                                                                       | -                               | -                           | P_trifoliata_00044_mRNA_28.1    |
| GF0044350 | 0                            | 0                        | 1                            | Hypothetical protein (1)                                              |                                                                                                                                                                                                                                                                                                      |                                                                                                                                                                                                                                                                                                                                                                                                                                                                                       | -                               | -                           | P_trifoliata_00044_mRNA_25.1    |
| GF0044349 | 0                            | 0                        | 1                            | Hypothetical protein (1)                                              | protein binding [GO:0005515 molecular_function (1)]; RNA-DNA hybrid ribonuclease activity [GO:0004523 molecular_function (1)]; nucleic acid binding [GO:0003676 molecular_function (1)]                                                                                                              | Ribonuclease H-like domain [IPR012337] (1); Ribonuclease H domain [IPR02156] (1); Ankyrin repeat [IPR02110] (1); Ankyrin repeat-containing domain [IPR020683] (1)                                                                                                                                                                                                                                                                                                                     | -                               | -                           | P_trifoliata_00044_mRNA_20.1    |
| GF0044348 | 0                            | 0                        | 1                            | Hypothetical protein (1)                                              |                                                                                                                                                                                                                                                                                                      |                                                                                                                                                                                                                                                                                                                                                                                                                                                                                       | -                               | -                           | P_trifoliata_00044_mRNA_18.1    |
| GF0044347 | 0                            | 0                        | 1                            | Ankyrin repeat plant-like protein (1)                                 |                                                                                                                                                                                                                                                                                                      |                                                                                                                                                                                                                                                                                                                                                                                                                                                                                       | -                               | -                           | P_trifoliata_00044_mRNA_17.1    |
| GF0044346 | 0                            | 0                        | 1                            | Hypothetical protein (1)                                              |                                                                                                                                                                                                                                                                                                      |                                                                                                                                                                                                                                                                                                                                                                                                                                                                                       | -                               | -                           | P_trifoliata_00044_mRNA_1.1     |
| GF0044345 | 0                            | 0                        | 1                            | Hypothetical protein (1)                                              |                                                                                                                                                                                                                                                                                                      |                                                                                                                                                                                                                                                                                                                                                                                                                                                                                       | -                               | -                           | P_trifoliata_00043_mRNA_98.1    |
| GF0044344 | 0                            | 0                        | 1                            | Cysteine proteinase inhibitor (1)                                     | cysteine-type endopeptidase inhibitor activity [GO:0004869 molecular_function (1)]                                                                                                                                                                                                                   | Proteinase inhibitor I25, cystatin, conserved region [IPR020381] (1); Proteinase inhibitor I25, cystatin, conserved site [IPR018073] (1); Cystatin [IPR027214] (1); Cystatin domain [IPR00010] (1)                                                                                                                                                                                                                                                                                    | -                               | -                           | P_trifoliata_00043_mRNA_96.1    |
| GF0044343 | 0                            | 0                        | 1                            | Hypothetical protein (1)                                              |                                                                                                                                                                                                                                                                                                      |                                                                                                                                                                                                                                                                                                                                                                                                                                                                                       | -                               | -                           | P_trifoliata_00043_mRNA_94.1    |

| ID        | Num. in <i>C. clementiae</i> | Num. in <i>C. auris</i> | Num. in <i>P. furiosus</i> | Note                                                                     | GO                                                                                                                                                                                                                                                                                | InterPro                                                                                                                                                                                                                                                                                                                                                                  | Members in <i>C. clementiae</i> | Members in <i>C. auris</i> | Members in <i>P. furiosus</i> |
|-----------|------------------------------|-------------------------|----------------------------|--------------------------------------------------------------------------|-----------------------------------------------------------------------------------------------------------------------------------------------------------------------------------------------------------------------------------------------------------------------------------|---------------------------------------------------------------------------------------------------------------------------------------------------------------------------------------------------------------------------------------------------------------------------------------------------------------------------------------------------------------------------|---------------------------------|----------------------------|-------------------------------|
| GF0044342 | 0                            | 0                       | 0                          | 1 Hypothetical protein (1)                                               |                                                                                                                                                                                                                                                                                   |                                                                                                                                                                                                                                                                                                                                                                           | -                               | -                          | P_trifoliata_00043_mRNA_91.1  |
| GF0044341 | 0                            | 0                       | 0                          | 1 Hypothetical protein (1)                                               |                                                                                                                                                                                                                                                                                   |                                                                                                                                                                                                                                                                                                                                                                           | -                               | -                          | P_trifoliata_00043_mRNA_79.1  |
| GF0044340 | 0                            | 0                       | 0                          | 1 TRAF-like family protein isoform 2 (1)                                 | protein binding [GO:0005515 molecular_function] (1)                                                                                                                                                                                                                               | MATH/TRAF domain [IPRO2083] (1); TRAF-like [IPRO0874] (1)                                                                                                                                                                                                                                                                                                                 | -                               | -                          | P_trifoliata_00043_mRNA_78.1  |
| GF0044339 | 0                            | 0                       | 0                          | 1 Hypothetical protein (1)                                               |                                                                                                                                                                                                                                                                                   |                                                                                                                                                                                                                                                                                                                                                                           | -                               | -                          | P_trifoliata_00043_mRNA_75.1  |
| GF0044338 | 0                            | 0                       | 0                          | 1 Hypothetical protein (1)                                               |                                                                                                                                                                                                                                                                                   |                                                                                                                                                                                                                                                                                                                                                                           | -                               | -                          | P_trifoliata_00043_mRNA_66.1  |
| GF0044337 | 0                            | 0                       | 0                          | 1 Hypothetical protein (1)                                               |                                                                                                                                                                                                                                                                                   | Early nodulin 93 ENOD93 protein [IPRO0505] (1)                                                                                                                                                                                                                                                                                                                            | -                               | -                          | P_trifoliata_00043_mRNA_51.1  |
| GF0044336 | 0                            | 0                       | 0                          | 1 Ribosomal protein S8e family protein (1)                               | structural constituent of ribosome [GO:0003735 molecular_function] (1); translation [GO:0006412 biological_process] (1); intracellular [GO:0005622 cellular_component] (1); ribosome [GO:0005840 cellular_component] (1)                                                          | Ribosomal protein S8e [IPRO01047] (1); Ribosomal protein S8e/ribosomal biogenesis NSAC [IPRO22309] (1)                                                                                                                                                                                                                                                                    | -                               | -                          | P_trifoliata_00043_mRNA_5.1   |
| GF0044335 | 0                            | 0                       | 0                          | 1 Calcineurin B-like protein 02 (1)                                      | calcium ion binding [GO:0005509 molecular_function] (1)                                                                                                                                                                                                                           | EF-hand domain pair [IPRO11992] (1); EF-hand domain [IPRO2048] (1)                                                                                                                                                                                                                                                                                                        | -                               | -                          | P_trifoliata_00043_mRNA_4.1   |
| GF0044334 | 0                            | 0                       | 0                          | 1 Hypothetical protein (1)                                               |                                                                                                                                                                                                                                                                                   |                                                                                                                                                                                                                                                                                                                                                                           | -                               | -                          | P_trifoliata_00043_mRNA_3.1   |
| GF0044333 | 0                            | 0                       | 0                          | 1 Hypothetical protein (1)                                               |                                                                                                                                                                                                                                                                                   |                                                                                                                                                                                                                                                                                                                                                                           | -                               | -                          | P_trifoliata_00043_mRNA_25.1  |
| GF0044332 | 0                            | 0                       | 0                          | 1 Hypothetical protein (1)                                               |                                                                                                                                                                                                                                                                                   |                                                                                                                                                                                                                                                                                                                                                                           | -                               | -                          | P_trifoliata_00043_mRNA_24.1  |
| GF0044331 | 0                            | 0                       | 0                          | 1 Hypothetical protein (1)                                               |                                                                                                                                                                                                                                                                                   |                                                                                                                                                                                                                                                                                                                                                                           | -                               | -                          | P_trifoliata_00043_mRNA_21.1  |
| GF0044330 | 0                            | 0                       | 0                          | 1 Hypothetical protein (1)                                               |                                                                                                                                                                                                                                                                                   |                                                                                                                                                                                                                                                                                                                                                                           | -                               | -                          | P_trifoliata_00043_mRNA_2.1   |
| GF0044329 | 0                            | 0                       | 0                          | 1 Mitochondrial ATP synthase g subunit family protein (1)                | hydrogen ion transmembrane transporter activity [GO:0018078 molecular_function] (1); ATP synthesis coupled proton transport [GO:0015986 biological_process] (1); mitochondrial proton-transporting ATP synthase complex, coupling factor F1(o) [GO:000276 cellular_component] (1) | ATPase, F0 complex, subunit G, mitochondrial [IPRO0808] (1)                                                                                                                                                                                                                                                                                                               | -                               | -                          | P_trifoliata_00043_mRNA_19.1  |
| GF0044328 | 0                            | 0                       | 0                          | 1 Hypothetical protein (1)                                               |                                                                                                                                                                                                                                                                                   |                                                                                                                                                                                                                                                                                                                                                                           | -                               | -                          | P_trifoliata_00043_mRNA_111.1 |
| GF0044327 | 0                            | 0                       | 0                          | 1 Hypothetical protein (1)                                               | nucleic acid binding [GO:0003676 molecular_function] (1); protein dimerization activity [GO:0046983 molecular_function] (1)                                                                                                                                                       | HAT, C-terminal dimerisation domain [IPRO08906] (1); Ribonuclease H-like domain [IPRO12337] (1)                                                                                                                                                                                                                                                                           | -                               | -                          | P_trifoliata_00043_mRNA_100.1 |
| GF0044326 | 0                            | 0                       | 0                          | 1 Hypothetical protein (1)                                               |                                                                                                                                                                                                                                                                                   |                                                                                                                                                                                                                                                                                                                                                                           | -                               | -                          | P_trifoliata_00042_mRNA_94.1  |
| GF0044325 | 0                            | 0                       | 0                          | 1 Hypothetical protein (1)                                               |                                                                                                                                                                                                                                                                                   |                                                                                                                                                                                                                                                                                                                                                                           | -                               | -                          | P_trifoliata_00042_mRNA_9.1   |
| GF0044324 | 0                            | 0                       | 0                          | 1 Hypothetical protein (1)                                               | regulation of transcription, DNA-templated [GO:0006355 biological_process] (1)                                                                                                                                                                                                    | FHY3/FAR1 family [IPRO31052] (1)                                                                                                                                                                                                                                                                                                                                          | -                               | -                          | P_trifoliata_00042_mRNA_81.1  |
| GF0044323 | 0                            | 0                       | 0                          | 1 Somatic embryogenesis receptor-like kinase (1)                         | protein binding [GO:0005515 molecular_function] (1)                                                                                                                                                                                                                               | Leucine-rich repeat domain, L domain-like [IPRO32675] (1); Leucine-rich repeat [IPRO0161] (1)                                                                                                                                                                                                                                                                             | -                               | -                          | P_trifoliata_00042_mRNA_8.1   |
| GF0044322 | 0                            | 0                       | 0                          | 1 Hypothetical protein (1)                                               | nucleic acid binding [GO:0003676 molecular_function] (1); protein dimerization activity [GO:0046983 molecular_function] (1)                                                                                                                                                       | Ribonuclease H-like domain [IPRO12337] (1); HAT, C-terminal dimerisation domain [IPRO08906] (1)                                                                                                                                                                                                                                                                           | -                               | -                          | P_trifoliata_00042_mRNA_73.1  |
| GF0044321 | 0                            | 0                       | 0                          | 1 Hypothetical protein (1)                                               |                                                                                                                                                                                                                                                                                   |                                                                                                                                                                                                                                                                                                                                                                           | -                               | -                          | P_trifoliata_00042_mRNA_69.1  |
| GF0044320 | 0                            | 0                       | 0                          | 1 Hypothetical protein (1)                                               |                                                                                                                                                                                                                                                                                   | Zinc knuckle CX2CX4HX4C [IPRO28336] (1)                                                                                                                                                                                                                                                                                                                                   | -                               | -                          | P_trifoliata_00042_mRNA_67.1  |
| GF0044319 | 0                            | 0                       | 0                          | 1 Hypothetical protein (1)                                               |                                                                                                                                                                                                                                                                                   |                                                                                                                                                                                                                                                                                                                                                                           | -                               | -                          | P_trifoliata_00042_mRNA_64.1  |
| GF0044318 | 0                            | 0                       | 0                          | 1 Hypothetical protein (1)                                               | serine-type endopeptidase activity [GO:0006322 molecular_function] (1); proteolysis [GO:0006508 biological_process] (1)                                                                                                                                                           | Peptidase S8/S53 domain [IPRO00209] (1); Peptidase S8, subtilisin-related [IPRO1550] (1); Peptidase S8, subtilisin, Ser-site active [IPRO23828] (1)                                                                                                                                                                                                                       | -                               | -                          | P_trifoliata_00042_mRNA_60.1  |
| GF0044317 | 0                            | 0                       | 0                          | 1 Hypothetical protein (1)                                               |                                                                                                                                                                                                                                                                                   |                                                                                                                                                                                                                                                                                                                                                                           | -                               | -                          | P_trifoliata_00042_mRNA_53.1  |
| GF0044316 | 0                            | 0                       | 0                          | 1 Hypothetical protein (1)                                               |                                                                                                                                                                                                                                                                                   |                                                                                                                                                                                                                                                                                                                                                                           | -                               | -                          | P_trifoliata_00042_mRNA_52.1  |
| GF0044315 | 0                            | 0                       | 0                          | 1 Hypothetical protein (1)                                               |                                                                                                                                                                                                                                                                                   |                                                                                                                                                                                                                                                                                                                                                                           | -                               | -                          | P_trifoliata_00042_mRNA_50.1  |
| GF0044314 | 0                            | 0                       | 0                          | 1 Probably inactive leucine-rich repeat receptor-like protein kinase (1) |                                                                                                                                                                                                                                                                                   | Concanavalin A-like lectin/glucanase domain [IPRO13320] (1); Leucine-rich repeat domain, L domain-like [IPRO32675] (1)                                                                                                                                                                                                                                                    | -                               | -                          | P_trifoliata_00042_mRNA_5.1   |
| GF0044313 | 0                            | 0                       | 0                          | 1 Hypothetical protein (1)                                               |                                                                                                                                                                                                                                                                                   |                                                                                                                                                                                                                                                                                                                                                                           | -                               | -                          | P_trifoliata_00042_mRNA_49.1  |
| GF0044312 | 0                            | 0                       | 0                          | 1 Hypothetical protein (1)                                               |                                                                                                                                                                                                                                                                                   |                                                                                                                                                                                                                                                                                                                                                                           | -                               | -                          | P_trifoliata_00042_mRNA_48.1  |
| GF0044311 | 0                            | 0                       | 0                          | 1 Hypothetical protein (1)                                               |                                                                                                                                                                                                                                                                                   |                                                                                                                                                                                                                                                                                                                                                                           | -                               | -                          | P_trifoliata_00042_mRNA_47.1  |
| GF0044310 | 0                            | 0                       | 0                          | 1 CCT motif family protein, expressed (1)                                | protein binding [GO:0005515 molecular_function] (1)                                                                                                                                                                                                                               | CCT domain [IPRO10402] (1)                                                                                                                                                                                                                                                                                                                                                | -                               | -                          | P_trifoliata_00042_mRNA_42.1  |
| GF0044309 | 0                            | 0                       | 0                          | 1 Hypothetical protein (1)                                               |                                                                                                                                                                                                                                                                                   |                                                                                                                                                                                                                                                                                                                                                                           | -                               | -                          | P_trifoliata_00042_mRNA_36.1  |
| GF0044308 | 0                            | 0                       | 0                          | 1 Hypothetical protein (1)                                               |                                                                                                                                                                                                                                                                                   |                                                                                                                                                                                                                                                                                                                                                                           | -                               | -                          | P_trifoliata_00042_mRNA_32.1  |
| GF0044307 | 0                            | 0                       | 0                          | 1 Putative RNA-directed DNA polymerase (1)                               |                                                                                                                                                                                                                                                                                   | Reverse transcriptase domain [IPRO00477] (1); Reverse transcriptase zinc-binding domain [IPRO26960] (1)                                                                                                                                                                                                                                                                   | -                               | -                          | P_trifoliata_00042_mRNA_23.1  |
| GF0044306 | 0                            | 0                       | 0                          | 1 60S ribosomal protein L8 (1)                                           | ribosome [GO:0005840 cellular_component] (1); structural constituent of ribosome [GO:0003735 molecular_function] (1); intracellular [GO:0005622 cellular_component] (1); translation [GO:0006412 biological_process] (1)                                                          | Ribosomal protein L2 [IPRO02171] (1); Ribosomal protein L2, C-terminal [IPRO22669] (1); Ribosomal protein L2, domain 3 [IPRO14726] (1); Ribosomal protein L2 domain 2 [IPRO14723] (1); Translation protein S43-like domain [IPRO08991] (1)                                                                                                                                | -                               | -                          | P_trifoliata_00042_mRNA_21.1  |
| GF0044305 | 0                            | 0                       | 0                          | 1 Hypothetical protein (1)                                               |                                                                                                                                                                                                                                                                                   |                                                                                                                                                                                                                                                                                                                                                                           | -                               | -                          | P_trifoliata_00042_mRNA_20.1  |
| GF0044304 | 0                            | 0                       | 0                          | 1 Hypothetical protein (1)                                               |                                                                                                                                                                                                                                                                                   | GAG-pre-ignition domain [IPRO25724] (1)                                                                                                                                                                                                                                                                                                                                   | -                               | -                          | P_trifoliata_00042_mRNA_19.1  |
| GF0044303 | 0                            | 0                       | 0                          | 1 Hypothetical protein (1)                                               |                                                                                                                                                                                                                                                                                   |                                                                                                                                                                                                                                                                                                                                                                           | -                               | -                          | P_trifoliata_00042_mRNA_18.1  |
| GF0044302 | 0                            | 0                       | 0                          | 1 Hypothetical protein (1)                                               |                                                                                                                                                                                                                                                                                   |                                                                                                                                                                                                                                                                                                                                                                           | -                               | -                          | P_trifoliata_00042_mRNA_17.1  |
| GF0044301 | 0                            | 0                       | 0                          | 1 Hypothetical protein (1)                                               |                                                                                                                                                                                                                                                                                   | B3 domain-containing protein [IPRO05508] (1)                                                                                                                                                                                                                                                                                                                              | -                               | -                          | P_trifoliata_00042_mRNA_15.1  |
| GF0044300 | 0                            | 0                       | 0                          | 1 Hypothetical protein (1)                                               |                                                                                                                                                                                                                                                                                   |                                                                                                                                                                                                                                                                                                                                                                           | -                               | -                          | P_trifoliata_00042_mRNA_13.1  |
| GF0044299 | 0                            | 0                       | 0                          | 1 Hypothetical protein (1)                                               |                                                                                                                                                                                                                                                                                   | Glycosyltransferase family 92 [IPRO08166] (1)                                                                                                                                                                                                                                                                                                                             | -                               | -                          | P_trifoliata_00042_mRNA_12.1  |
| GF0044298 | 0                            | 0                       | 0                          | 1 Hypothetical protein (1)                                               | transferase activity, transferring hexoyl groups [GO:0016758 molecular_function] (1); metabolic process [GO:0008152 biological_process] (1)                                                                                                                                       | UDP-glucuronosylUDP-glycosyltransferase [IPRO0213] (1)                                                                                                                                                                                                                                                                                                                    | -                               | -                          | P_trifoliata_00042_mRNA_104.1 |
| GF0044297 | 0                            | 0                       | 0                          | 1 Hypothetical protein (1)                                               |                                                                                                                                                                                                                                                                                   |                                                                                                                                                                                                                                                                                                                                                                           | -                               | -                          | P_trifoliata_00042_mRNA_102.1 |
| GF0044296 | 0                            | 0                       | 0                          | 1 TMV resistance protein N (1)                                           | protein binding [GO:0005515 molecular_function] (1); signal transduction [GO:0007165 biological_process] (1)                                                                                                                                                                      | Toll/interleukin-1 receptor homology (TRH) domain [IPRO00157] (1)                                                                                                                                                                                                                                                                                                         | -                               | -                          | P_trifoliata_00042_mRNA_1.1   |
| GF0044295 | 0                            | 0                       | 0                          | 1 Hypothetical protein (1)                                               | malate transport [GO:0015743 biological_process] (1)                                                                                                                                                                                                                              | Aluminum-activated malate transporter [IPRO20966] (1)                                                                                                                                                                                                                                                                                                                     | -                               | -                          | P_trifoliata_00041_mRNA_96.1  |
| GF0044294 | 0                            | 0                       | 0                          | 1 Hypothetical protein (1)                                               |                                                                                                                                                                                                                                                                                   | Endonuclease/conomerase/phosphatase [IPRO05133] (1)                                                                                                                                                                                                                                                                                                                       | -                               | -                          | P_trifoliata_00041_mRNA_95.1  |
| GF0044293 | 0                            | 0                       | 0                          | 1 Hypothetical protein (1)                                               |                                                                                                                                                                                                                                                                                   | LOG family [IPRO31100] (1); Leucine-rich repeat [IPRO0161] (1); Leucine-rich repeat-containing N-terminal, plant-type [IPRO13210] (1); Glutathione S-transferase, C-terminal-like [IPRO10987] (1); Leucine-rich repeat domain, L domain-like [IPRO32675] (1); Leucine-rich repeat, typical subtype [IPRO03591] (1); Glutathione S-transferase, C-terminal [IPRO00406] (1) | -                               | -                          | P_trifoliata_00041_mRNA_84.1  |
| GF0044292 | 0                            | 0                       | 0                          | 1 LRR receptor-like kinase family protein (1)                            | protein binding [GO:0005515 molecular_function] (1)                                                                                                                                                                                                                               | Tetratricopeptide repeat-containing domain [IPRO13026] (1); Tetratricopeptide repeat [IPRO19734] (1); Tetratricopeptide repeat 2 [IPRO13105] (1); Tetratricopeptide-like helical domain [IPRO11990] (1)                                                                                                                                                                   | -                               | -                          | P_trifoliata_00041_mRNA_79.1  |
| GF0044291 | 0                            | 0                       | 0                          | 1 Tetratricopeptide repeat protein 27-like protein (1)                   | protein binding [GO:0005515 molecular_function] (1)                                                                                                                                                                                                                               | Tetratricopeptide repeat-containing domain [IPRO13026] (1); Tetratricopeptide repeat [IPRO19734] (1); Tetratricopeptide repeat 2 [IPRO13105] (1); Tetratricopeptide-like helical domain [IPRO11990] (1)                                                                                                                                                                   | -                               | -                          | P_trifoliata_00041_mRNA_76.1  |
| GF0044289 | 0                            | 0                       | 0                          | 1 Hypothetical protein (1)                                               | protein binding [GO:0005515 molecular_function] (1)                                                                                                                                                                                                                               | Tetratricopeptide-like helical domain [IPRO11990] (1); Tetratricopeptide repeat [IPRO19734] (1); Tetratricopeptide repeat-containing domain [IPRO13026] (1)                                                                                                                                                                                                               | -                               | -                          | P_trifoliata_00041_mRNA_72.1  |
| GF0044288 | 0                            | 0                       | 0                          | 1 Hypothetical protein (1)                                               |                                                                                                                                                                                                                                                                                   |                                                                                                                                                                                                                                                                                                                                                                           | -                               | -                          | P_trifoliata_00041_mRNA_71.1  |
| GF0044287 | 0                            | 0                       | 0                          | 1 Hypothetical protein (1)                                               |                                                                                                                                                                                                                                                                                   |                                                                                                                                                                                                                                                                                                                                                                           | -                               | -                          | P_trifoliata_00041_mRNA_70.1  |
| GF0044286 | 0                            | 0                       | 0                          | 1 Hypothetical protein (1)                                               |                                                                                                                                                                                                                                                                                   |                                                                                                                                                                                                                                                                                                                                                                           | -                               | -                          | P_trifoliata_00041_mRNA_68.1  |
| GF0044285 | 0                            | 0                       | 0                          | 1 Hypothetical protein (1)                                               |                                                                                                                                                                                                                                                                                   |                                                                                                                                                                                                                                                                                                                                                                           | -                               | -                          | P_trifoliata_00041_mRNA_67.1  |
| GF0044284 | 0                            | 0                       | 0                          | 1 Hypothetical protein (1)                                               | zinc ion binding [GO:0008270 molecular_function] (1); nucleic acid binding [GO:0003676 molecular_function] (1)                                                                                                                                                                    | Zinc finger, C2HC-type [IPRO01878] (1); Zinc knuckle CX2CX4HX4C [IPRO28336] (1)                                                                                                                                                                                                                                                                                           | -                               | -                          | P_trifoliata_00041_mRNA_65.1  |
| GF0044283 | 0                            | 0                       | 0                          | 1 NAD(P)H-dependent codonome reductase-like protein (1)                  | oxidoreductase activity [GO:0016491 molecular_function] (1); oxidation-reduction process [GO:0055114 biological_process] (1)                                                                                                                                                      | Aldo-keto reductase [IPRO20471] (1); Aldo-keto reductase/potassium channel subunit beta [IPRO01395] (1); NADP-dependent oxidoreductase domain [IPRO23210] (1); Aldo-keto reductase, conserved site [IPRO18170] (1)                                                                                                                                                        | -                               | -                          | P_trifoliata_00041_mRNA_58.1  |
| GF0044282 | 0                            | 0                       | 0                          | 1 Hypothetical protein (1)                                               |                                                                                                                                                                                                                                                                                   |                                                                                                                                                                                                                                                                                                                                                                           | -                               | -                          | P_trifoliata_00041_mRNA_52.1  |
| GF0044281 | 0                            | 0                       | 0                          | 1 Hypothetical protein (1)                                               |                                                                                                                                                                                                                                                                                   |                                                                                                                                                                                                                                                                                                                                                                           | -                               | -                          | P_trifoliata_00041_mRNA_42.1  |

| ID        | Num. in <i>C. clementiae</i> | Num. in <i>C. canthii</i> | Num. in <i>P. trifoliata</i> | Note                                                                                                                        | GO                                                                                                                                                                                                                                                                                                                                       | InterPro                                                                                                                                                                                                                                                                                                                                                                                                                                                                                                                                                                                           | Members in <i>C. clementiae</i> | Members in <i>C. canthii</i> | Members in <i>P. trifoliata</i> |
|-----------|------------------------------|---------------------------|------------------------------|-----------------------------------------------------------------------------------------------------------------------------|------------------------------------------------------------------------------------------------------------------------------------------------------------------------------------------------------------------------------------------------------------------------------------------------------------------------------------------|----------------------------------------------------------------------------------------------------------------------------------------------------------------------------------------------------------------------------------------------------------------------------------------------------------------------------------------------------------------------------------------------------------------------------------------------------------------------------------------------------------------------------------------------------------------------------------------------------|---------------------------------|------------------------------|---------------------------------|
| GF0044280 | 0                            | 0                         | 1                            | Putative somatic embryogenesis protein kinase 1 (1)                                                                         | protein binding [GO:0005515 molecular_function] (1); ATP binding [GO:0005254 molecular_function] (1); protein phosphorylation [GO:0006468 biological_process] (1); protein kinase activity [GO:0004672 molecular_function] (1)                                                                                                           | Leucine-rich repeat [IPR01611] (1); Serine/threonine-protein kinase, active site [IPR02871] (1); Serine/threonine/dual specificity protein kinase, catalytic domain [IPR02290] (1); Leucine-rich repeat domain, 1 domains-like [IPR032675] (1); Protein kinase-like domain [IPR011009] (1); Protein kinase domain [IPR00719] (1); Aldolase-type TIM barrel [IPR013785] (1); Glycosyl hydrolase family 27/36, conserved site [IPR000111] (1); Glycosyl hydrolase, family 27 [IPR002241] (1); Glycosyl hydrolase superfamily [IPR017853] (1); Glycosyl hydrolase, family 15, all-beta [IPR03780] (1) | -                               | -                            | P_trifoliata_00041_mRNA_14,1    |
| GF0044279 | 0                            | 0                         | 1                            | Hypothetical protein (1)                                                                                                    | hydrolase activity, hydrolyzing O-glycosyl compounds [GO:0004553 biological_process] (1); carbohydrate metabolic process [GO:0005975 biological_process] (1); catalytic activity [GO:0003824 molecular_function] (1)                                                                                                                     | -                                                                                                                                                                                                                                                                                                                                                                                                                                                                                                                                                                                                  | -                               | -                            | P_trifoliata_00040_mRNA_62,1    |
| GF0044278 | 0                            | 0                         | 1                            | Hypothetical protein (1)                                                                                                    | -                                                                                                                                                                                                                                                                                                                                        | -                                                                                                                                                                                                                                                                                                                                                                                                                                                                                                                                                                                                  | -                               | -                            | P_trifoliata_00040_mRNA_57,1    |
| GF0044277 | 0                            | 0                         | 1                            | Hypothetical protein (1)                                                                                                    | -                                                                                                                                                                                                                                                                                                                                        | -                                                                                                                                                                                                                                                                                                                                                                                                                                                                                                                                                                                                  | -                               | -                            | P_trifoliata_00040_mRNA_45,1    |
| GF0044276 | 0                            | 0                         | 1                            | Hypothetical protein (1)                                                                                                    | -                                                                                                                                                                                                                                                                                                                                        | -                                                                                                                                                                                                                                                                                                                                                                                                                                                                                                                                                                                                  | -                               | -                            | P_trifoliata_00040_mRNA_39,1    |
| GF0044275 | 0                            | 0                         | 1                            | Hypothetical protein (1)                                                                                                    | -                                                                                                                                                                                                                                                                                                                                        | -                                                                                                                                                                                                                                                                                                                                                                                                                                                                                                                                                                                                  | -                               | -                            | P_trifoliata_00040_mRNA_27,1    |
| GF0044274 | 0                            | 0                         | 1                            | Hypothetical protein (1)                                                                                                    | -                                                                                                                                                                                                                                                                                                                                        | -                                                                                                                                                                                                                                                                                                                                                                                                                                                                                                                                                                                                  | -                               | -                            | P_trifoliata_00040_mRNA_120,1   |
| GF0044273 | 0                            | 0                         | 1                            | UDP-glycosyltransferase 71C4 (1)                                                                                            | transferase activity, transferring hexosyl groups [GO:0016758 biological_function] (1); metabolic process [GO:0008152 biological_process] (1)                                                                                                                                                                                            | UDP-glucuronosyl-UDP-glycosyltransferase [IPR002213] (1)                                                                                                                                                                                                                                                                                                                                                                                                                                                                                                                                           | -                               | -                            | P_trifoliata_00040_mRNA_119,1   |
| GF0044272 | 0                            | 0                         | 1                            | Hypothetical protein (1)                                                                                                    | -                                                                                                                                                                                                                                                                                                                                        | -                                                                                                                                                                                                                                                                                                                                                                                                                                                                                                                                                                                                  | -                               | -                            | P_trifoliata_00040_mRNA_117,1   |
| GF0044271 | 0                            | 0                         | 1                            | Hypothetical protein (1)                                                                                                    | -                                                                                                                                                                                                                                                                                                                                        | -                                                                                                                                                                                                                                                                                                                                                                                                                                                                                                                                                                                                  | -                               | -                            | P_trifoliata_00039_mRNA_80,1    |
| GF0044270 | 0                            | 0                         | 1                            | Hypothetical protein (1)                                                                                                    | -                                                                                                                                                                                                                                                                                                                                        | -                                                                                                                                                                                                                                                                                                                                                                                                                                                                                                                                                                                                  | -                               | -                            | P_trifoliata_00039_mRNA_8,1     |
| GF0044269 | 0                            | 0                         | 1                            | Cysteine proteinase inhibitor (1)                                                                                           | cysteine-type endopeptidase inhibitor activity [GO:0004869 molecular_function] (1)                                                                                                                                                                                                                                                       | Cystatin [IPR027244] (1); Cystatin domain [IPR000010] (1); Proteinase inhibitor I25, cystatin, conserved region [IPR03381] (1)                                                                                                                                                                                                                                                                                                                                                                                                                                                                     | -                               | -                            | P_trifoliata_00039_mRNA_78,1    |
| GF0044268 | 0                            | 0                         | 1                            | Hypothetical protein (1)                                                                                                    | -                                                                                                                                                                                                                                                                                                                                        | -                                                                                                                                                                                                                                                                                                                                                                                                                                                                                                                                                                                                  | -                               | -                            | P_trifoliata_00039_mRNA_75,1    |
| GF0044267 | 0                            | 0                         | 1                            | Hypothetical protein (1)                                                                                                    | -                                                                                                                                                                                                                                                                                                                                        | -                                                                                                                                                                                                                                                                                                                                                                                                                                                                                                                                                                                                  | -                               | -                            | P_trifoliata_00039_mRNA_73,1    |
| GF0044266 | 0                            | 0                         | 1                            | Hypothetical protein (1)                                                                                                    | -                                                                                                                                                                                                                                                                                                                                        | -                                                                                                                                                                                                                                                                                                                                                                                                                                                                                                                                                                                                  | -                               | -                            | P_trifoliata_00039_mRNA_65,1    |
| GF0044265 | 0                            | 0                         | 1                            | Hypothetical protein (1)                                                                                                    | -                                                                                                                                                                                                                                                                                                                                        | -                                                                                                                                                                                                                                                                                                                                                                                                                                                                                                                                                                                                  | -                               | -                            | P_trifoliata_00039_mRNA_61,1    |
| GF0044264 | 0                            | 0                         | 1                            | Hypothetical protein (1)                                                                                                    | -                                                                                                                                                                                                                                                                                                                                        | LOG family [IPR031100] (1)                                                                                                                                                                                                                                                                                                                                                                                                                                                                                                                                                                         | -                               | -                            | P_trifoliata_00039_mRNA_58,1    |
| GF0044263 | 0                            | 0                         | 1                            | Hypothetical protein (1)                                                                                                    | -                                                                                                                                                                                                                                                                                                                                        | -                                                                                                                                                                                                                                                                                                                                                                                                                                                                                                                                                                                                  | -                               | -                            | P_trifoliata_00039_mRNA_54,1    |
| GF0044262 | 0                            | 0                         | 1                            | UDP-glycosyltransferase 73D1 (1)                                                                                            | metabolic process [GO:0008152 biological_process] (1); transferase activity, transferring hexosyl groups [GO:0016758 molecular_function] (1)                                                                                                                                                                                             | UDP-glucuronosyl-UDP-glycosyltransferase [IPR002213] (1)                                                                                                                                                                                                                                                                                                                                                                                                                                                                                                                                           | -                               | -                            | P_trifoliata_00039_mRNA_51,1    |
| GF0044261 | 0                            | 0                         | 1                            | Hypothetical protein (1)                                                                                                    | -                                                                                                                                                                                                                                                                                                                                        | -                                                                                                                                                                                                                                                                                                                                                                                                                                                                                                                                                                                                  | -                               | -                            | P_trifoliata_00039_mRNA_50,1    |
| GF0044260 | 0                            | 0                         | 1                            | Hypothetical protein (1)                                                                                                    | -                                                                                                                                                                                                                                                                                                                                        | -                                                                                                                                                                                                                                                                                                                                                                                                                                                                                                                                                                                                  | -                               | -                            | P_trifoliata_00039_mRNA_48,1    |
| GF0044259 | 0                            | 0                         | 1                            | Hypothetical protein (1)                                                                                                    | -                                                                                                                                                                                                                                                                                                                                        | -                                                                                                                                                                                                                                                                                                                                                                                                                                                                                                                                                                                                  | -                               | -                            | P_trifoliata_00039_mRNA_42,1    |
| GF0044258 | 0                            | 0                         | 1                            | Hypothetical protein (1)                                                                                                    | -                                                                                                                                                                                                                                                                                                                                        | -                                                                                                                                                                                                                                                                                                                                                                                                                                                                                                                                                                                                  | -                               | -                            | P_trifoliata_00039_mRNA_41,1    |
| GF0044257 | 0                            | 0                         | 1                            | Hypothetical protein (1)                                                                                                    | -                                                                                                                                                                                                                                                                                                                                        | -                                                                                                                                                                                                                                                                                                                                                                                                                                                                                                                                                                                                  | -                               | -                            | P_trifoliata_00039_mRNA_40,1    |
| GF0044256 | 0                            | 0                         | 1                            | Hypothetical protein (1)                                                                                                    | -                                                                                                                                                                                                                                                                                                                                        | CWC16 protein [IPR007590] (1); Thiain diphosphate-binding fold [IPR029061] (1)                                                                                                                                                                                                                                                                                                                                                                                                                                                                                                                     | -                               | -                            | P_trifoliata_00039_mRNA_39,1    |
| GF0044255 | 0                            | 0                         | 1                            | Hypothetical protein (1)                                                                                                    | metazoan process [GO:0009912 biological_process] (1); hydrolase activity [GO:0016787 molecular_function] (1)                                                                                                                                                                                                                             | Alpha/Beta hydrolase fold [IPR029058] (1); Alpha/beta hydrolase fold-5 [IPR013094] (1)                                                                                                                                                                                                                                                                                                                                                                                                                                                                                                             | -                               | -                            | P_trifoliata_00039_mRNA_36,1    |
| GF0044254 | 0                            | 0                         | 1                            | Hypothetical protein (1)                                                                                                    | -                                                                                                                                                                                                                                                                                                                                        | -                                                                                                                                                                                                                                                                                                                                                                                                                                                                                                                                                                                                  | -                               | -                            | P_trifoliata_00039_mRNA_31,1    |
| GF0044253 | 0                            | 0                         | 1                            | Hypothetical protein (1)                                                                                                    | heme binding [GO:0020037 molecular_function] (1); response to oxidative stress [GO:0006979 biological_process] (1); oxidation-reduction process [GO:0055114 biological_process] (1); peroxidase activity [GO:0004601 molecular_function] (1)                                                                                             | Haem peroxidase [IPR010255] (1); Haem peroxidase, animal [IPR019791] (1)                                                                                                                                                                                                                                                                                                                                                                                                                                                                                                                           | -                               | -                            | P_trifoliata_00039_mRNA_3,1     |
| GF0044252 | 0                            | 0                         | 1                            | 22.0 kDa class IV heat shock protein (1)                                                                                    | ribosome [GO:0005840 cellular_component] (1); translation [GO:0006412 biological_process] (1); intracellular [GO:0005622 cellular_component] (1); structural constituent of ribosome [GO:0003735 molecular_function] (1)                                                                                                                 | HSP20-like chaperone [IPR008978] (1); Alpha crystallin/Hsp20 domain [IPR020606] (1); Ribosomal protein L27e [IPR01141] (1); Small heat shock protein HSP20 [IPR031107] (1)                                                                                                                                                                                                                                                                                                                                                                                                                         | -                               | -                            | P_trifoliata_00039_mRNA_29,1    |
| GF0044251 | 0                            | 0                         | 1                            | Retrosposon protein, putative, unclassified, expressed (1)                                                                  | nucleic acid binding [GO:0003676 molecular_function] (1)                                                                                                                                                                                                                                                                                 | Reverse transcriptase domain [IPR000477] (1); Ribonuclease H-like domain [IPR012337] (1)                                                                                                                                                                                                                                                                                                                                                                                                                                                                                                           | -                               | -                            | P_trifoliata_00039_mRNA_24,1    |
| GF0044250 | 0                            | 0                         | 1                            | Hypothetical protein (1)                                                                                                    | nucleic acid binding [GO:0003676 molecular_function] (1); zinc ion binding [GO:0008270 molecular_function] (1)                                                                                                                                                                                                                           | Zinc finger, CCHC-type [IPR001878] (1)                                                                                                                                                                                                                                                                                                                                                                                                                                                                                                                                                             | -                               | -                            | P_trifoliata_00039_mRNA_23,1    |
| GF0044249 | 0                            | 0                         | 1                            | Hypothetical protein (1)                                                                                                    | -                                                                                                                                                                                                                                                                                                                                        | -                                                                                                                                                                                                                                                                                                                                                                                                                                                                                                                                                                                                  | -                               | -                            | P_trifoliata_00039_mRNA_21,1    |
| GF0044248 | 0                            | 0                         | 1                            | Hypothetical protein (1)                                                                                                    | -                                                                                                                                                                                                                                                                                                                                        | -                                                                                                                                                                                                                                                                                                                                                                                                                                                                                                                                                                                                  | -                               | -                            | P_trifoliata_00039_mRNA_18,1    |
| GF0044247 | 0                            | 0                         | 1                            | Hypothetical protein (1)                                                                                                    | -                                                                                                                                                                                                                                                                                                                                        | -                                                                                                                                                                                                                                                                                                                                                                                                                                                                                                                                                                                                  | -                               | -                            | P_trifoliata_00039_mRNA_17,1    |
| GF0044246 | 0                            | 0                         | 1                            | 66 kDa stress protein (1)                                                                                                   | protein binding [GO:0005515 molecular_function] (1)                                                                                                                                                                                                                                                                                      | WD40/YVTN repeat-like-containing domain [IPR015943] (1); WD40 repeat, conserved site [IPR019775] (1); WD40 repeat [IPR016880] (1); WD40-repeat-containing domain [IPR017986] (1)                                                                                                                                                                                                                                                                                                                                                                                                                   | -                               | -                            | P_trifoliata_00039_mRNA_11,1    |
| GF0044245 | 0                            | 0                         | 1                            | Hypothetical protein (1)                                                                                                    | -                                                                                                                                                                                                                                                                                                                                        | -                                                                                                                                                                                                                                                                                                                                                                                                                                                                                                                                                                                                  | -                               | -                            | P_trifoliata_00038_mRNA_99,1    |
| GF0044244 | 0                            | 0                         | 1                            | Polyubiquitin (1)                                                                                                           | protein binding [GO:0005515 molecular_function] (1)                                                                                                                                                                                                                                                                                      | Ubiquitin domain [IPR000624] (1); Ubiquitin-related domain [IPR029071] (1); Ubiquitin [IPR019956] (1)                                                                                                                                                                                                                                                                                                                                                                                                                                                                                              | -                               | -                            | P_trifoliata_00038_mRNA_98,1    |
| GF0044243 | 0                            | 0                         | 1                            | F-box protein interaction domain protein (1)                                                                                | protein binding [GO:0005515 molecular_function] (1)                                                                                                                                                                                                                                                                                      | F-box domain [IPR001810] (1); Galactose oxidase/kelch, beta-propeller [IPR011043] (1); F-box associated interaction domain [IPR017451] (1)                                                                                                                                                                                                                                                                                                                                                                                                                                                         | -                               | -                            | P_trifoliata_00038_mRNA_97,1    |
| GF0044242 | 0                            | 0                         | 1                            | Hypothetical protein (1)                                                                                                    | -                                                                                                                                                                                                                                                                                                                                        | -                                                                                                                                                                                                                                                                                                                                                                                                                                                                                                                                                                                                  | -                               | -                            | P_trifoliata_00038_mRNA_95,1    |
| GF0044241 | 0                            | 0                         | 1                            | Hypothetical protein (1)                                                                                                    | -                                                                                                                                                                                                                                                                                                                                        | -                                                                                                                                                                                                                                                                                                                                                                                                                                                                                                                                                                                                  | -                               | -                            | P_trifoliata_00038_mRNA_77,1    |
| GF0044240 | 0                            | 0                         | 1                            | Hypothetical protein (1)                                                                                                    | -                                                                                                                                                                                                                                                                                                                                        | Splicing factor 3B subunit 5/RD53 complex subunit 10 [IPR009846] (1)                                                                                                                                                                                                                                                                                                                                                                                                                                                                                                                               | -                               | -                            | P_trifoliata_00038_mRNA_72,1    |
| GF0044239 | 0                            | 0                         | 1                            | Hypothetical protein (1)                                                                                                    | -                                                                                                                                                                                                                                                                                                                                        | Protein of unknown function DUF3475 [IPR021864] (1)                                                                                                                                                                                                                                                                                                                                                                                                                                                                                                                                                | -                               | -                            | P_trifoliata_00038_mRNA_7,1     |
| GF0044238 | 0                            | 0                         | 1                            | 11S seed storage globulin (1)                                                                                               | nutrient reservoir activity [GO:0045735 molecular_function] (1)                                                                                                                                                                                                                                                                          | RmlC-like cupin domain [IPR011051] (1); RmlC-like jelly roll fold [IPR014710] (1); Cupin 1 [IPR006045] (1)                                                                                                                                                                                                                                                                                                                                                                                                                                                                                         | -                               | -                            | P_trifoliata_00038_mRNA_63,1    |
| GF0044237 | 0                            | 0                         | 1                            | Hypothetical protein (1)                                                                                                    | -                                                                                                                                                                                                                                                                                                                                        | Glutathione S-transferase, C-terminal-like [IPR010987] (1)                                                                                                                                                                                                                                                                                                                                                                                                                                                                                                                                         | -                               | -                            | P_trifoliata_00038_mRNA_61,1    |
| GF0044236 | 0                            | 0                         | 1                            | Actin-depolymerizing factor 6 (1)                                                                                           | actin cytoskeleton [GO:0015629 cellular_component] (1); actin binding [GO:0003779 molecular_function] (1); actin filament depolymerization [GO:003042 biological_process] (1); intracellular [GO:0005622 cellular_component] (1)                                                                                                         | Actin-depolymerizing factor homology domain [IPR002108] (1); ADP-Cofilin/Destrin [IPR017904] (1); ADP-F-Actinin-like domain [IPR029066] (1)                                                                                                                                                                                                                                                                                                                                                                                                                                                        | -                               | -                            | P_trifoliata_00038_mRNA_53,1    |
| GF0044235 | 0                            | 0                         | 1                            | Gag non-LTR retrotransposase (1)                                                                                            | nucleic acid binding [GO:0003676 molecular_function] (1); ribosome [GO:0005840 cellular_component] (1); zinc ion binding [GO:0008270 molecular_function] (1); translation [GO:0006412 biological_process] (1); intracellular [GO:0005622 cellular_component] (1); structural constituent of ribosome [GO:0003735 molecular_function] (1) | Ribosomal protein L2 [IPR002171] (1); Ribosomal protein L2, C-terminal [IPR022609] (1); Domain of unknown function DUF4283 [IPR025558] (1); Ribosomal protein L2, domain 3 [IPR014728] (1); Ribosomal protein L2 domain 2 [IPR014722] (1); Zinc knuckle CX2CX4HX6 [IPR028386] (1); Zinc finger, CCHC-type [IPR001878] (1); Translation protein SH3-like domain [IPR008991] (1)                                                                                                                                                                                                                     | -                               | -                            | P_trifoliata_00038_mRNA_46,1    |
| GF0044234 | 0                            | 0                         | 1                            | Hypothetical protein (1)                                                                                                    | -                                                                                                                                                                                                                                                                                                                                        | -                                                                                                                                                                                                                                                                                                                                                                                                                                                                                                                                                                                                  | -                               | -                            | P_trifoliata_00038_mRNA_42,1    |
| GF0044233 | 0                            | 0                         | 1                            | Hypothetical protein (1)                                                                                                    | -                                                                                                                                                                                                                                                                                                                                        | -                                                                                                                                                                                                                                                                                                                                                                                                                                                                                                                                                                                                  | -                               | -                            | P_trifoliata_00038_mRNA_4,1     |
| GF0044232 | 0                            | 0                         | 1                            | Hypothetical protein (1)                                                                                                    | -                                                                                                                                                                                                                                                                                                                                        | -                                                                                                                                                                                                                                                                                                                                                                                                                                                                                                                                                                                                  | -                               | -                            | P_trifoliata_00038_mRNA_39,1    |
| GF0044231 | 0                            | 0                         | 1                            | Decarboxylase activity [GO:0016491 molecular_function] (1); oxidation-reduction process [GO:0055114 biological_process] (1) | oxidoreductase activity [GO:0016491 molecular_function] (1); oxidation-reduction process [GO:0055114 biological_process] (1)                                                                                                                                                                                                             | Isopenicillin N synthase-like [IPR027443] (1); Oooglutamate/iron-dependent dioxygenase [IPR05121] (1)                                                                                                                                                                                                                                                                                                                                                                                                                                                                                              | -                               | -                            | P_trifoliata_00038_mRNA_32,1    |
| GF0044230 | 0                            | 0                         | 1                            | Hypothetical protein (1)                                                                                                    | -                                                                                                                                                                                                                                                                                                                                        | -                                                                                                                                                                                                                                                                                                                                                                                                                                                                                                                                                                                                  | -                               | -                            | P_trifoliata_00038_mRNA_31,1    |
| GF0044229 | 0                            | 0                         | 1                            | Hypothetical protein (1)                                                                                                    | -                                                                                                                                                                                                                                                                                                                                        | -                                                                                                                                                                                                                                                                                                                                                                                                                                                                                                                                                                                                  | -                               | -                            | P_trifoliata_00038_mRNA_3,1     |
| GF0044228 | 0                            | 0                         | 1                            | Hypothetical protein (1)                                                                                                    | oxidation-reduction process [GO:0055114 biological_process] (1); oxidoreductase activity [GO:0016491 molecular_function] (1)                                                                                                                                                                                                             | Oooglutamate/iron-dependent dioxygenase [IPR05121] (1); Isopenicillin N synthase-like [IPR027443] (1)                                                                                                                                                                                                                                                                                                                                                                                                                                                                                              | -                               | -                            | P_trifoliata_00038_mRNA_29,1    |
| GF0044227 | 0                            | 0                         | 1                            | Hypothetical protein (1)                                                                                                    | -                                                                                                                                                                                                                                                                                                                                        | -                                                                                                                                                                                                                                                                                                                                                                                                                                                                                                                                                                                                  | -                               | -                            | P_trifoliata_00038_mRNA_28,1    |
| GF0044226 | 0                            | 0                         | 1                            | Hypothetical protein (1)                                                                                                    | -                                                                                                                                                                                                                                                                                                                                        | -                                                                                                                                                                                                                                                                                                                                                                                                                                                                                                                                                                                                  | -                               | -                            | P_trifoliata_00038_mRNA_27,1    |
| GF0044225 | 0                            | 0                         | 1                            | Hypothetical protein (1)                                                                                                    | -                                                                                                                                                                                                                                                                                                                                        | -                                                                                                                                                                                                                                                                                                                                                                                                                                                                                                                                                                                                  | -                               | -                            | P_trifoliata_00038_mRNA_26,1    |
| GF0044224 | 0                            | 0                         | 1                            | Hypothetical protein (1)                                                                                                    | -                                                                                                                                                                                                                                                                                                                                        | -                                                                                                                                                                                                                                                                                                                                                                                                                                                                                                                                                                                                  | -                               | -                            | P_trifoliata_00038_mRNA_25,1    |
| GF0044223 | 0                            | 0                         | 1                            | Hypothetical protein (1)                                                                                                    | -                                                                                                                                                                                                                                                                                                                                        | -                                                                                                                                                                                                                                                                                                                                                                                                                                                                                                                                                                                                  | -                               | -                            | P_trifoliata_00038_mRNA_22,1    |
| GF0044222 | 0                            | 0                         | 1                            | Hypothetical protein (1)                                                                                                    | -                                                                                                                                                                                                                                                                                                                                        | -                                                                                                                                                                                                                                                                                                                                                                                                                                                                                                                                                                                                  | -                               | -                            | P_trifoliata_00038_mRNA_21,1    |
| GF0044221 | 0                            | 0                         | 1                            | Hypothetical protein (1)                                                                                                    | -                                                                                                                                                                                                                                                                                                                                        | -                                                                                                                                                                                                                                                                                                                                                                                                                                                                                                                                                                                                  | -                               | -                            | P_trifoliata_00038_mRNA_20,1    |

| ID        | Num. in <i>C. clementiae</i> | Num. in <i>C. canthii</i> | Num. in <i>P. trifoliatum</i> | Note                                                             | GO                                                                                                                                                                                                                                                                                                                                                                                                                                              | InterPro                                                                                                                                                                                                                                                                                                                   | Members in <i>C. clementiae</i> | Members in <i>C. canthii</i> | Members in <i>P. trifoliatum</i> |
|-----------|------------------------------|---------------------------|-------------------------------|------------------------------------------------------------------|-------------------------------------------------------------------------------------------------------------------------------------------------------------------------------------------------------------------------------------------------------------------------------------------------------------------------------------------------------------------------------------------------------------------------------------------------|----------------------------------------------------------------------------------------------------------------------------------------------------------------------------------------------------------------------------------------------------------------------------------------------------------------------------|---------------------------------|------------------------------|----------------------------------|
| GF0044220 | 0                            | 0                         | 1                             | Hypothetical protein (1)                                         | protein binding [GO:0005515 molecular_function] (1)                                                                                                                                                                                                                                                                                                                                                                                             | Domain of unknown function DUF4283 [IPR025553] (1); Leucine-rich repeat domain, L domain-like [IPR032675] (1); Leucine-rich repeat [IPR01611] (1); Leucine-rich repeat domain, L domain-like [IPR032675] (1)                                                                                                               | -                               | -                            | P_trifoliata_00038_mRNA_119.1    |
| GF0044219 | 0                            | 0                         | 1                             | Hypothetical protein (1)                                         |                                                                                                                                                                                                                                                                                                                                                                                                                                                 |                                                                                                                                                                                                                                                                                                                            | -                               | -                            | P_trifoliata_00038_mRNA_116.1    |
| GF0044218 | 0                            | 0                         | 1                             | Hypothetical protein (1)                                         |                                                                                                                                                                                                                                                                                                                                                                                                                                                 |                                                                                                                                                                                                                                                                                                                            | -                               | -                            | P_trifoliata_00038_mRNA_115.1    |
| GF0044217 | 0                            | 0                         | 1                             | Hypothetical protein (1)                                         |                                                                                                                                                                                                                                                                                                                                                                                                                                                 |                                                                                                                                                                                                                                                                                                                            | -                               | -                            | P_trifoliata_00038_mRNA_114.1    |
| GF0044216 | 0                            | 0                         | 1                             | Hypothetical protein (1)                                         | membrane [GO:0000160] cellular_component (1); protein transport [GO:0015031 biological_process] (1)                                                                                                                                                                                                                                                                                                                                             | SecY submit domain [IPR023201] (1); SecY/SEC61-alpha family [IPR002208] (1)                                                                                                                                                                                                                                                | -                               | -                            | P_trifoliata_00038_mRNA_113.1    |
| GF0044215 | 0                            | 0                         | 1                             | Hypothetical protein (1)                                         |                                                                                                                                                                                                                                                                                                                                                                                                                                                 |                                                                                                                                                                                                                                                                                                                            | -                               | -                            | P_trifoliata_00038_mRNA_112.1    |
| GF0044214 | 0                            | 0                         | 1                             | Hypothetical protein (1)                                         |                                                                                                                                                                                                                                                                                                                                                                                                                                                 |                                                                                                                                                                                                                                                                                                                            | -                               | -                            | P_trifoliata_00038_mRNA_105.1    |
| GF0044213 | 0                            | 0                         | 1                             | Hypothetical protein (1)                                         |                                                                                                                                                                                                                                                                                                                                                                                                                                                 |                                                                                                                                                                                                                                                                                                                            | -                               | -                            | P_trifoliata_00038_mRNA_102.1    |
| GF0044212 | 0                            | 0                         | 1                             | Hypothetical protein (1)                                         |                                                                                                                                                                                                                                                                                                                                                                                                                                                 |                                                                                                                                                                                                                                                                                                                            | -                               | -                            | P_trifoliata_00038_mRNA_10.1     |
| GF0044211 | 0                            | 0                         | 1                             | Hypothetical protein (1)                                         |                                                                                                                                                                                                                                                                                                                                                                                                                                                 |                                                                                                                                                                                                                                                                                                                            | -                               | -                            | P_trifoliata_00037_mRNA_9.1      |
| GF0044210 | 0                            | 0                         | 1                             | Hypothetical protein (1)                                         |                                                                                                                                                                                                                                                                                                                                                                                                                                                 |                                                                                                                                                                                                                                                                                                                            | -                               | -                            | P_trifoliata_00037_mRNA_76.1     |
| GF0044209 | 0                            | 0                         | 1                             | Hypothetical protein (1)                                         |                                                                                                                                                                                                                                                                                                                                                                                                                                                 |                                                                                                                                                                                                                                                                                                                            | -                               | -                            | P_trifoliata_00037_mRNA_75.1     |
| GF0044208 | 0                            | 0                         | 1                             | Hypothetical protein (1)                                         | oxidoreductase activity [GO:0016491 molecular_function] (1); oxidation-reduction process [GO:005114 biological_process] (1)                                                                                                                                                                                                                                                                                                                     | Isopenicillin N synthase-like [IPR027443] (1); Oxoglutarate/iron-dependent dioxygenase [IPR005123] (1)                                                                                                                                                                                                                     | -                               | -                            | P_trifoliata_00037_mRNA_60.1     |
| GF0044207 | 0                            | 0                         | 1                             | Hypothetical protein (1)                                         |                                                                                                                                                                                                                                                                                                                                                                                                                                                 |                                                                                                                                                                                                                                                                                                                            | -                               | -                            | P_trifoliata_00037_mRNA_6.1      |
| GF0044206 | 0                            | 0                         | 1                             | Hypothetical protein (1)                                         |                                                                                                                                                                                                                                                                                                                                                                                                                                                 |                                                                                                                                                                                                                                                                                                                            | -                               | -                            | P_trifoliata_00037_mRNA_54.1     |
| GF0044205 | 0                            | 0                         | 1                             | Hypothetical protein (1)                                         |                                                                                                                                                                                                                                                                                                                                                                                                                                                 |                                                                                                                                                                                                                                                                                                                            | -                               | -                            | P_trifoliata_00037_mRNA_35.1     |
| GF0044204 | 0                            | 0                         | 1                             | Hypothetical protein (1)                                         |                                                                                                                                                                                                                                                                                                                                                                                                                                                 |                                                                                                                                                                                                                                                                                                                            | -                               | -                            | P_trifoliata_00037_mRNA_32.1     |
| GF0044203 | 0                            | 0                         | 1                             | Hypothetical protein (1)                                         |                                                                                                                                                                                                                                                                                                                                                                                                                                                 |                                                                                                                                                                                                                                                                                                                            | -                               | -                            | P_trifoliata_00037_mRNA_20.1     |
| GF0044202 | 0                            | 0                         | 1                             | Somatic embryogenesis receptor kinase 1 (1)                      | protein binding [GO:0005515 molecular_function] (1)                                                                                                                                                                                                                                                                                                                                                                                             | Leucine-rich repeat domain, L domain-like [IPR032675] (1); Leucine-rich repeat-containing N-terminal, plant-type [IPR013210] (1); Leucine-rich repeat [IPR01611] (1)                                                                                                                                                       | -                               | -                            | P_trifoliata_00037_mRNA_111.1    |
| GF0044201 | 0                            | 0                         | 1                             | Hypothetical protein (1)                                         | protein binding [GO:0005515 molecular_function] (1)                                                                                                                                                                                                                                                                                                                                                                                             | Leucine-rich repeat [IPR01611] (1); Leucine-rich repeat domain, L domain-like [IPR032675] (1)                                                                                                                                                                                                                              | -                               | -                            | P_trifoliata_00037_mRNA_106.1    |
| GF0044200 | 0                            | 0                         | 1                             | Hypothetical protein (1)                                         | binding [GO:0005488 molecular_function] (1)                                                                                                                                                                                                                                                                                                                                                                                                     | Armadillo-like helical [IPR011989] (1); Armadillo-type fold [IPR016024] (1)                                                                                                                                                                                                                                                | -                               | -                            | P_trifoliata_00037_mRNA_103.1    |
| GF0044199 | 0                            | 0                         | 1                             | Pre-mrna-splicing factor rse1 (1)                                |                                                                                                                                                                                                                                                                                                                                                                                                                                                 | Domain of unknown function DUF4409 [IPR025521] (1); Domain of unknown function DUF239 [IPR004314] (1)                                                                                                                                                                                                                      | -                               | -                            | P_trifoliata_00036_mRNA_96.1     |
| GF0044198 | 0                            | 0                         | 1                             | Peroxidase 21 (1)                                                | response to oxidative stress [GO:0066979 biological_process] (1); home binding [GO:0020037 molecular_function] (1); peroxidase activity [GO:0004601 molecular_function] (1); oxidation-reduction process [GO:005114 biological_process] (1)                                                                                                                                                                                                     | Haem peroxidase, plant/fungal/bacterial [IPR020161] (1); Plant peroxidase [IPR008025] (1); Haem peroxidase [IPR010255] (1)                                                                                                                                                                                                 | -                               | -                            | P_trifoliata_00036_mRNA_81.1     |
| GF0044197 | 0                            | 0                         | 1                             | Hypothetical protein (1)                                         |                                                                                                                                                                                                                                                                                                                                                                                                                                                 |                                                                                                                                                                                                                                                                                                                            | -                               | -                            | P_trifoliata_00036_mRNA_79.1     |
| GF0044196 | 0                            | 0                         | 1                             | NADH-ubiquinone oxidoreductase 20 kDa subunit, mitochondrial (1) | quinone binding [GO:0048038 molecular_function] (1); oxidation-reduction process [GO:005114 biological_process] (1); NADH dehydrogenase (ubiquinone) activity [GO:0008137 molecular_function] (1); iron-sulfur cluster binding [GO:0051536 molecular_function] (1); 4 iron, 4 sulfur cluster binding [GO:0051539 molecular_function] (1)                                                                                                        | NADH-ubiquinone oxidoreductase, 20 kDa subunit [IPR006138] (1); NADH-ubiquinone oxidoreductase-like, 20kDa subunit [IPR06137] (1)                                                                                                                                                                                          | -                               | -                            | P_trifoliata_00036_mRNA_76.1     |
| GF0044195 | 0                            | 0                         | 1                             | Hypothetical protein (1)                                         |                                                                                                                                                                                                                                                                                                                                                                                                                                                 |                                                                                                                                                                                                                                                                                                                            | -                               | -                            | P_trifoliata_00036_mRNA_75.1     |
| GF0044194 | 0                            | 0                         | 1                             | Hypothetical protein (1)                                         |                                                                                                                                                                                                                                                                                                                                                                                                                                                 |                                                                                                                                                                                                                                                                                                                            | -                               | -                            | P_trifoliata_00036_mRNA_71.1     |
| GF0044193 | 0                            | 0                         | 1                             | Hypothetical protein (1)                                         |                                                                                                                                                                                                                                                                                                                                                                                                                                                 |                                                                                                                                                                                                                                                                                                                            | -                               | -                            | P_trifoliata_00036_mRNA_70.1     |
| GF0044192 | 0                            | 0                         | 1                             | Hypothetical protein (1)                                         | regulation of transcription, DNA-templated [GO:0006355 biological_process] (1)                                                                                                                                                                                                                                                                                                                                                                  | Topless family [IPR027228] (1)                                                                                                                                                                                                                                                                                             | -                               | -                            | P_trifoliata_00036_mRNA_7.1      |
| GF0044191 | 0                            | 0                         | 1                             | Hypothetical protein (1)                                         | protein binding [GO:0005515 molecular_function] (1); transport [GO:0006810 biological_process] (1); ATPase activity [GO:0016887 molecular_function] (1); integral component of membrane [GO:0016021 cellular_component] (1); transmembrane transport [GO:0050885 biological_process] (1); ATP binding [GO:0005524 molecular_function] (1); ATPase activity, coupled to transmembrane movement of substances [GO:0042626 molecular_function] (1) | Kelch-type beta propeller [IPR015915] (1)                                                                                                                                                                                                                                                                                  | -                               | -                            | P_trifoliata_00036_mRNA_68.1     |
| GF0044190 | 0                            | 0                         | 1                             | Hypothetical protein (1)                                         | ATPase activity, coupled to transmembrane movement of substances [GO:0042626 molecular_function] (1); transmembrane transport [GO:0050885 biological_process] (1); ATP binding [GO:0005524 molecular_function] (1); ABC transporter C family protein (1)                                                                                                                                                                                        | ABC transporter, conserved site [IPR017811] (1); P-loop containing nucleoside triphosphate hydrolase [IPR027417] (1); ABC transporter type 1, transmembrane domain [IPR011527] (1); ABC transporter-like [IPR003439] (1); AAA+ ATPase domain [IPR003593] (1)                                                               | -                               | -                            | P_trifoliata_00036_mRNA_64.1     |
| GF0044189 | 0                            | 0                         | 1                             | ABC transporter C family protein (1)                             | ATPase activity, coupled to transmembrane movement of substances [GO:0042626 molecular_function] (1); transmembrane transport [GO:0050885 biological_process] (1); ATP binding [GO:0005524 molecular_function] (1); ATPase activity [GO:0016887 molecular_function] (1); integral component of membrane [GO:0016021 cellular_component] (1); transport [GO:0006810 biological_process] (1)                                                      | P-loop containing nucleoside triphosphate hydrolase [IPR027417] (1); ABC transporter type 1, transmembrane domain [IPR011527] (1); AAA+ ATPase domain [IPR003593] (1)                                                                                                                                                      | -                               | -                            | P_trifoliata_00036_mRNA_63.1     |
| GF0044188 | 0                            | 0                         | 1                             | Adenine nucleotide alpha hydrolase-like domain kinase (1)        | ATP binding [GO:0005524 molecular_function] (1); protein kinase activity [GO:0004672 molecular_function] (1); protein phosphorylation [GO:0006068 biological_process] (1)                                                                                                                                                                                                                                                                       | Protein kinase-like domain [IPR011009] (1); Rossmann-like alpha/beta/alpha sandwich fold [IPR014729] (1); Protein kinase domain [IPR000719] (1); Tyrosine-protein kinase, active site [IPR008266] (1)                                                                                                                      | -                               | -                            | P_trifoliata_00036_mRNA_62.1     |
| GF0044187 | 0                            | 0                         | 1                             | Hypothetical protein (1)                                         |                                                                                                                                                                                                                                                                                                                                                                                                                                                 |                                                                                                                                                                                                                                                                                                                            | -                               | -                            | P_trifoliata_00036_mRNA_60.1     |
| GF0044186 | 0                            | 0                         | 1                             | Hypothetical protein (1)                                         | ADP binding [GO:0043531 molecular_function] (1)                                                                                                                                                                                                                                                                                                                                                                                                 | P-loop containing nucleoside triphosphate hydrolase [IPR027417] (1); NB-ARC [IPR002182] (1)                                                                                                                                                                                                                                | -                               | -                            | P_trifoliata_00036_mRNA_55.1     |
| GF0044185 | 0                            | 0                         | 1                             | Hypothetical protein (1)                                         |                                                                                                                                                                                                                                                                                                                                                                                                                                                 |                                                                                                                                                                                                                                                                                                                            | -                               | -                            | P_trifoliata_00036_mRNA_53.1     |
| GF0044184 | 0                            | 0                         | 1                             | Hypothetical protein (1)                                         |                                                                                                                                                                                                                                                                                                                                                                                                                                                 |                                                                                                                                                                                                                                                                                                                            | -                               | -                            | P_trifoliata_00036_mRNA_42.1     |
| GF0044183 | 0                            | 0                         | 1                             | Hypothetical protein (1)                                         |                                                                                                                                                                                                                                                                                                                                                                                                                                                 |                                                                                                                                                                                                                                                                                                                            | -                               | -                            | P_trifoliata_00036_mRNA_4.1      |
| GF0044182 | 0                            | 0                         | 1                             | Hypothetical protein (1)                                         |                                                                                                                                                                                                                                                                                                                                                                                                                                                 |                                                                                                                                                                                                                                                                                                                            | -                               | -                            | P_trifoliata_00036_mRNA_3.1      |
| GF0044181 | 0                            | 0                         | 1                             | Hypothetical protein (1)                                         | cell wall [GO:0005618 cellular_component] (1); cell wall modification [GO:0042545 biological_process] (1); pectinesterase activity [GO:0003599 molecular_function] (1)                                                                                                                                                                                                                                                                          | Pectinesterase, Asp active site [IPR033131] (1); Pectinesterase, catalytic [IPR000710] (1); Pectin lyase fold [IPR02334] (1); Pectin lyase fold/virulence factor [IPR011050] (1)                                                                                                                                           | -                               | -                            | P_trifoliata_00036_mRNA_28.1     |
| GF0044180 | 0                            | 0                         | 1                             | Disease resistance protein (TIR-NBS-LRR class) (1)               | ADP binding [GO:0043531 molecular_function] (1); signal transduction [GO:0007165 biological_process] (1); protein binding [GO:0005515 molecular_function] (1)                                                                                                                                                                                                                                                                                   | P-loop containing nucleoside triphosphate hydrolase [IPR027417] (1); NB-ARC [IPR02182] (1); Leucine-rich repeat 3 [IPR011713] (1); Toll/interleukin-1 receptor homology (TIR) domain [IPR00157] (1); Winged helix-turn-helix DNA-binding domain [IPR011991] (1); Leucine-rich repeat domain, L domain-like [IPR032675] (1) | -                               | -                            | P_trifoliata_00036_mRNA_15.1     |
| GF0044179 | 0                            | 0                         | 1                             | Hypothetical protein (1)                                         | protein dimerization activity [GO:0046983 molecular_function] (1)                                                                                                                                                                                                                                                                                                                                                                               | Mys-type, basic helix-loop-helix (BHLLH) domain [IPR011598] (1)                                                                                                                                                                                                                                                            | -                               | -                            | P_trifoliata_00036_mRNA_104.1    |
| GF0044178 | 0                            | 0                         | 1                             | Hypothetical protein (1)                                         |                                                                                                                                                                                                                                                                                                                                                                                                                                                 |                                                                                                                                                                                                                                                                                                                            | -                               | -                            | P_trifoliata_00036_mRNA_1.1      |
| GF0044177 | 0                            | 0                         | 1                             | Hypothetical protein (1)                                         |                                                                                                                                                                                                                                                                                                                                                                                                                                                 |                                                                                                                                                                                                                                                                                                                            | -                               | -                            | P_trifoliata_00035_mRNA_91.1     |
| GF0044176 | 0                            | 0                         | 1                             | Hypothetical protein (1)                                         |                                                                                                                                                                                                                                                                                                                                                                                                                                                 |                                                                                                                                                                                                                                                                                                                            | -                               | -                            | P_trifoliata_00035_mRNA_90.1     |
| GF0044175 | 0                            | 0                         | 1                             | Hypothetical protein (1)                                         |                                                                                                                                                                                                                                                                                                                                                                                                                                                 |                                                                                                                                                                                                                                                                                                                            | -                               | -                            | P_trifoliata_00035_mRNA_89.1     |
| GF0044174 | 0                            | 0                         | 1                             | Hypothetical protein (1)                                         |                                                                                                                                                                                                                                                                                                                                                                                                                                                 |                                                                                                                                                                                                                                                                                                                            | -                               | -                            | P_trifoliata_00035_mRNA_87.1     |
| GF0044173 | 0                            | 0                         | 1                             | Hypothetical protein (1)                                         |                                                                                                                                                                                                                                                                                                                                                                                                                                                 |                                                                                                                                                                                                                                                                                                                            | -                               | -                            | P_trifoliata_00035_mRNA_85.1     |
| GF0044172 | 0                            | 0                         | 1                             | LRR receptor-like serine/threonine-protein kinase FLS2 (1)       | protein binding [GO:0005515 molecular_function] (1)                                                                                                                                                                                                                                                                                                                                                                                             | Leucine-rich repeat [IPR01611] (1); Leucine-rich repeat domain, L domain-like [IPR032675] (1); Leucine-rich repeat, typical subtype [IPR003591] (1)                                                                                                                                                                        | -                               | -                            | P_trifoliata_00035_mRNA_84.1     |
| GF0044171 | 0                            | 0                         | 1                             | Hypothetical protein (1)                                         | transcription factor TFIIID complex [GO:0005669 cellular_component] (1); transcription initiation from RNA polymerase II promoter [GO:0006367 biological_process] (1)                                                                                                                                                                                                                                                                           | TAF155 protein, conserved region [IPR006751] (1)                                                                                                                                                                                                                                                                           | -                               | -                            | P_trifoliata_00035_mRNA_83.1     |
| GF0044170 | 0                            | 0                         | 1                             | Hypothetical protein (1)                                         |                                                                                                                                                                                                                                                                                                                                                                                                                                                 |                                                                                                                                                                                                                                                                                                                            | -                               | -                            | P_trifoliata_00035_mRNA_8.1      |
| GF0044169 | 0                            | 0                         | 1                             | Hypothetical protein (1)                                         |                                                                                                                                                                                                                                                                                                                                                                                                                                                 |                                                                                                                                                                                                                                                                                                                            | -                               | -                            | P_trifoliata_00035_mRNA_77.1     |
| GF0044168 | 0                            | 0                         | 1                             | 60S ribosomal protein L29-1 (1)                                  | structural constituent of ribosome [GO:0005735 molecular_function] (1); intracellular [GO:0005622 cellular_component] (1); translation [GO:0006412 biological_process] (1); ribosome [GO:0005840 cellular_component] (1)                                                                                                                                                                                                                        | Ribosomal protein L29c [IPR002673] (1)                                                                                                                                                                                                                                                                                     | -                               | -                            | P_trifoliata_00035_mRNA_73.1     |
| GF0044167 | 0                            | 0                         | 1                             | Hypothetical protein (1)                                         | iron-sulfur cluster binding [GO:0005156 molecular_function] (1); electron carrier activity [GO:0009055 molecular_function] (1)                                                                                                                                                                                                                                                                                                                  | Beta-grasp domain [IPR012675] (1); 2Fe-2S ferredoxin-type iron-sulfur binding domain [IPR001041] (1)                                                                                                                                                                                                                       | -                               | -                            | P_trifoliata_00035_mRNA_46.1     |
| GF0044166 | 0                            | 0                         | 1                             | Hypothetical protein (1)                                         |                                                                                                                                                                                                                                                                                                                                                                                                                                                 |                                                                                                                                                                                                                                                                                                                            | -                               | -                            | P_trifoliata_00035_mRNA_40.1     |



| ID        | Num. in <i>C. clementiae</i> | Num. in <i>C. canthii</i> | Num. in <i>P. trifoliata</i> | Note                                                                          | GO                                                                                                                                                                                                                                  | InterPro                                                                                                                                                                                                                                                                                                                                                                                                                                                  | Members in <i>C. clementiae</i> | Members in <i>C. canthii</i> | Members in <i>P. trifoliata</i> |
|-----------|------------------------------|---------------------------|------------------------------|-------------------------------------------------------------------------------|-------------------------------------------------------------------------------------------------------------------------------------------------------------------------------------------------------------------------------------|-----------------------------------------------------------------------------------------------------------------------------------------------------------------------------------------------------------------------------------------------------------------------------------------------------------------------------------------------------------------------------------------------------------------------------------------------------------|---------------------------------|------------------------------|---------------------------------|
| GF0044165 | 0                            | 0                         | 0                            | 1 Hypothetical protein (1)                                                    |                                                                                                                                                                                                                                     |                                                                                                                                                                                                                                                                                                                                                                                                                                                           |                                 |                              | P_trifoliata_00035_mRNA_39.1    |
| GF0044164 | 0                            | 0                         | 0                            | 1 Hypothetical protein (1)                                                    |                                                                                                                                                                                                                                     |                                                                                                                                                                                                                                                                                                                                                                                                                                                           |                                 |                              | P_trifoliata_00035_mRNA_38.1    |
| GF0044163 | 0                            | 0                         | 0                            | 1 Hypothetical protein (1)                                                    |                                                                                                                                                                                                                                     |                                                                                                                                                                                                                                                                                                                                                                                                                                                           |                                 |                              | P_trifoliata_00035_mRNA_35.1    |
| GF0044162 | 0                            | 0                         | 0                            | 1 Hypothetical protein (1)                                                    |                                                                                                                                                                                                                                     |                                                                                                                                                                                                                                                                                                                                                                                                                                                           |                                 |                              | P_trifoliata_00035_mRNA_33.1    |
| GF0044161 | 0                            | 0                         | 0                            | 1 Hypothetical protein (1)                                                    |                                                                                                                                                                                                                                     |                                                                                                                                                                                                                                                                                                                                                                                                                                                           |                                 |                              | P_trifoliata_00035_mRNA_31.1    |
| GF0044160 | 0                            | 0                         | 0                            | 1 Hypothetical protein (1)                                                    |                                                                                                                                                                                                                                     |                                                                                                                                                                                                                                                                                                                                                                                                                                                           |                                 |                              | P_trifoliata_00035_mRNA_3.1     |
| GF0044159 | 0                            | 0                         | 0                            | 1 Hypothetical protein (1)                                                    | nucleic acid binding [GO:0003676 molecular_function] (1)                                                                                                                                                                            | Ribonuclease H-like domain [IPRO12337] (1)                                                                                                                                                                                                                                                                                                                                                                                                                |                                 |                              | P_trifoliata_00035_mRNA_29.1    |
| GF0044158 | 0                            | 0                         | 0                            | 1 Hypothetical protein (1)                                                    |                                                                                                                                                                                                                                     |                                                                                                                                                                                                                                                                                                                                                                                                                                                           |                                 |                              | P_trifoliata_00035_mRNA_27.1    |
| GF0044157 | 0                            | 0                         | 0                            | 1 Hypothetical protein (1)                                                    | nucleic acid binding [GO:0003676 molecular_function] (1)                                                                                                                                                                            | Ribonuclease H-like domain [IPRO12337] (1)                                                                                                                                                                                                                                                                                                                                                                                                                |                                 |                              | P_trifoliata_00035_mRNA_24.1    |
| GF0044156 | 0                            | 0                         | 0                            | 1 Hypothetical protein (1)                                                    |                                                                                                                                                                                                                                     |                                                                                                                                                                                                                                                                                                                                                                                                                                                           |                                 |                              | P_trifoliata_00035_mRNA_22.1    |
| GF0044155 | 0                            | 0                         | 0                            | 1 Hypothetical protein (1)                                                    |                                                                                                                                                                                                                                     |                                                                                                                                                                                                                                                                                                                                                                                                                                                           |                                 |                              | P_trifoliata_00035_mRNA_21.1    |
| GF0044154 | 0                            | 0                         | 0                            | 1 Hypothetical protein (1)                                                    | nucleic acid binding [GO:0003676 molecular_function] (1); zinc ion binding [GO:0008270 molecular_function] (1)                                                                                                                      | Zinc finger, CCHC-type [IPRO1878] (1)                                                                                                                                                                                                                                                                                                                                                                                                                     |                                 |                              | P_trifoliata_00035_mRNA_18.1    |
| GF0044153 | 0                            | 0                         | 0                            | 1 Hypothetical protein (1)                                                    |                                                                                                                                                                                                                                     | Ribosomal protein L5, N-terminal [IPRO1310] (1); Ribosomal protein L5 domain [IPRO22803] (1)                                                                                                                                                                                                                                                                                                                                                              |                                 |                              | P_trifoliata_00035_mRNA_17.1    |
| GF0044152 | 0                            | 0                         | 0                            | 1 Hypothetical protein (1)                                                    |                                                                                                                                                                                                                                     |                                                                                                                                                                                                                                                                                                                                                                                                                                                           |                                 |                              | P_trifoliata_00035_mRNA_16.1    |
| GF0044151 | 0                            | 0                         | 0                            | 1 Hypothetical protein (1)                                                    |                                                                                                                                                                                                                                     |                                                                                                                                                                                                                                                                                                                                                                                                                                                           |                                 |                              | P_trifoliata_00035_mRNA_15.1    |
| GF0044150 | 0                            | 0                         | 0                            | 1 Polyketide cyclase/dehydrase and lipid transport superfamily protein (1)    |                                                                                                                                                                                                                                     | Polyketide cyclase/dehydrase [IPRO19587] (1); START-like domain [IPRO23393] (1)                                                                                                                                                                                                                                                                                                                                                                           |                                 |                              | P_trifoliata_00035_mRNA_119.1   |
| GF0044149 | 0                            | 0                         | 0                            | 1 Hypothetical protein (1)                                                    |                                                                                                                                                                                                                                     |                                                                                                                                                                                                                                                                                                                                                                                                                                                           |                                 |                              | P_trifoliata_00035_mRNA_113.1   |
| GF0044148 | 0                            | 0                         | 0                            | 1 Hypothetical protein (1)                                                    |                                                                                                                                                                                                                                     |                                                                                                                                                                                                                                                                                                                                                                                                                                                           |                                 |                              | P_trifoliata_00035_mRNA_1.1     |
| GF0044147 | 0                            | 0                         | 0                            | 1 Ribosomal protein L23 (1)                                                   | structural constituent of ribosome [GO:0003735 molecular_function] (1); translation [GO:0006412 biological_process] (1); ribosome [GO:0005840 cellular_component] (1)                                                               | Ribosomal protein L14 domain [IPRO2357] (1); Ribosomal protein L14 conserved site [IPRO19972] (1); PGG domain [IPRO20961] (1); Ribosomal protein L14b-L23c [IPRO00218] (1)                                                                                                                                                                                                                                                                                |                                 |                              | P_trifoliata_00034_mRNA_60.1    |
| GF0044146 | 0                            | 0                         | 0                            | 1 Hypothetical protein (1)                                                    |                                                                                                                                                                                                                                     |                                                                                                                                                                                                                                                                                                                                                                                                                                                           |                                 |                              | P_trifoliata_00034_mRNA_6.1     |
| GF0044145 | 0                            | 0                         | 0                            | 1 Hypothetical protein (1)                                                    |                                                                                                                                                                                                                                     |                                                                                                                                                                                                                                                                                                                                                                                                                                                           |                                 |                              | P_trifoliata_00034_mRNA_43.1    |
| GF0044144 | 0                            | 0                         | 0                            | 1 F-box protein interaction domain protein (1)                                | protein binding [GO:0005515 molecular_function] (1)                                                                                                                                                                                 | F-box associated interaction domain [IPRO1745] (1); F-box associated domain, type 1 [IPRO06527] (1); F-box domain [IPRO01810] (1)                                                                                                                                                                                                                                                                                                                         |                                 |                              | P_trifoliata_00034_mRNA_28.1    |
| GF0044143 | 0                            | 0                         | 0                            | 1 Putative E3 ubiquitin-protein ligase XBAT35 (1)                             | zinc ion binding [GO:0008270 molecular_function] (1); protein binding [GO:0005515 molecular_function] (1)                                                                                                                           | Zinc finger, RING/YFVE/PHD-type [IPRO13083] (1); Ankyrin repeat [IPRO02110] (1); Ankyrin repeat-containing domain [IPRO20683] (1); Zinc finger, RING-type [IPRO01841] (1)                                                                                                                                                                                                                                                                                 |                                 |                              | P_trifoliata_00034_mRNA_12.1    |
| GF0044142 | 0                            | 0                         | 0                            | 1 Hypothetical protein (1)                                                    |                                                                                                                                                                                                                                     |                                                                                                                                                                                                                                                                                                                                                                                                                                                           |                                 |                              | P_trifoliata_00034_mRNA_106.1   |
| GF0044141 | 0                            | 0                         | 0                            | 1 Hypothetical protein (1)                                                    |                                                                                                                                                                                                                                     |                                                                                                                                                                                                                                                                                                                                                                                                                                                           |                                 |                              | P_trifoliata_00034_mRNA_105.1   |
| GF0044140 | 0                            | 0                         | 0                            | 1 Hypothetical protein (1)                                                    |                                                                                                                                                                                                                                     |                                                                                                                                                                                                                                                                                                                                                                                                                                                           |                                 |                              | P_trifoliata_00034_mRNA_104.1   |
| GF0044139 | 0                            | 0                         | 0                            | 1 Hypothetical protein (1)                                                    |                                                                                                                                                                                                                                     |                                                                                                                                                                                                                                                                                                                                                                                                                                                           |                                 |                              | P_trifoliata_00034_mRNA_100.1   |
| GF0044138 | 0                            | 0                         | 0                            | 1 Hypothetical protein (1)                                                    | O-methyltransferase activity [GO:0008171 molecular_function] (1)                                                                                                                                                                    | S-adenosyl-L-methionine-dependent methyltransferase [IPRO29063] (1); O-methyltransferase, family 3 [IPRO02935] (1)                                                                                                                                                                                                                                                                                                                                        |                                 |                              | P_trifoliata_00033_mRNA_99.1    |
| GF0044137 | 0                            | 0                         | 0                            | 1 Hypothetical protein (1)                                                    |                                                                                                                                                                                                                                     |                                                                                                                                                                                                                                                                                                                                                                                                                                                           |                                 |                              | P_trifoliata_00033_mRNA_92.1    |
| GF0044136 | 0                            | 0                         | 0                            | 1 Hypothetical protein (1)                                                    |                                                                                                                                                                                                                                     |                                                                                                                                                                                                                                                                                                                                                                                                                                                           |                                 |                              | P_trifoliata_00033_mRNA_91.1    |
| GF0044135 | 0                            | 0                         | 0                            | 1 Hypothetical protein (1)                                                    |                                                                                                                                                                                                                                     |                                                                                                                                                                                                                                                                                                                                                                                                                                                           |                                 |                              | P_trifoliata_00033_mRNA_90.1    |
| GF0044134 | 0                            | 0                         | 0                            | 1 G-type lectin S-receptor-like serine/threonine-protein kinase RLK1 (1)      |                                                                                                                                                                                                                                     | Bulb-type lectin domain [IPRO01480] (1); Concavenavlin A-like lectin-glucanase domain [IPRO13320] (1); Protein kinase domain [IPRO00719] (1); Protein kinase-like domain [IPRO11009] (1); Concavenavlin A-like lectin-glucanase domain [IPRO13320] (1); Serine/threonine-protein kinase, active site [IPRO00827] (1); Protein kinase, ATP binding site [IPRO1744] (1); Serine/threonine/dual specificity protein kinase, catalytic domain [IPRO02290] (1) |                                 |                              | P_trifoliata_00033_mRNA_89.1    |
| GF0044133 | 0                            | 0                         | 0                            | 1 G-type lectin S-receptor-like serine/threonine-protein kinase RLK1 (1)      | ATP binding [GO:0005524 molecular_function] (1); protein kinase activity [GO:0004672 molecular_function] (1); protein phosphorylation [GO:0006468 biological_process] (1)                                                           | Serine/threonine-protein kinase, active site [IPRO00827] (1); Protein kinase, ATP binding site [IPRO1744] (1); Serine/threonine/dual specificity protein kinase, catalytic domain [IPRO02290] (1)                                                                                                                                                                                                                                                         |                                 |                              | P_trifoliata_00033_mRNA_87.1    |
| GF0044132 | 0                            | 0                         | 0                            | 1 G-type lectin S-receptor-like serine/threonine-protein kinase RLK1 (1)      |                                                                                                                                                                                                                                     | Bulb-type lectin domain [IPRO01480] (1)                                                                                                                                                                                                                                                                                                                                                                                                                   |                                 |                              | P_trifoliata_00033_mRNA_86.1    |
| GF0044131 | 0                            | 0                         | 0                            | 1 Hypothetical protein (1)                                                    |                                                                                                                                                                                                                                     |                                                                                                                                                                                                                                                                                                                                                                                                                                                           |                                 |                              | P_trifoliata_00033_mRNA_84.1    |
| GF0044130 | 0                            | 0                         | 0                            | 1 Cysteine synthase (1)                                                       | cysteine biosynthetic process from serine [GO:0006535 biological_process] (1)                                                                                                                                                       | Cysteine synthase/cystathionine beta-synthase, pyridoxal-phosphate attachment site [IPRO01216] (1); Tryptophan synthase beta subunit-like PLP-dependent enzyme [IPRO01926] (1)                                                                                                                                                                                                                                                                            |                                 |                              | P_trifoliata_00033_mRNA_71.1    |
| GF0044129 | 0                            | 0                         | 0                            | 1 Hypothetical protein (1)                                                    |                                                                                                                                                                                                                                     |                                                                                                                                                                                                                                                                                                                                                                                                                                                           |                                 |                              | P_trifoliata_00033_mRNA_7.1     |
| GF0044128 | 0                            | 0                         | 0                            | 1 Hypothetical protein (1)                                                    |                                                                                                                                                                                                                                     |                                                                                                                                                                                                                                                                                                                                                                                                                                                           |                                 |                              | P_trifoliata_00033_mRNA_6.1     |
| GF0044127 | 0                            | 0                         | 0                            | 1 Hypothetical protein (1)                                                    |                                                                                                                                                                                                                                     |                                                                                                                                                                                                                                                                                                                                                                                                                                                           |                                 |                              | P_trifoliata_00033_mRNA_59.1    |
| GF0044126 | 0                            | 0                         | 0                            | 1 Early light-induced protein, chloroplast (1)                                |                                                                                                                                                                                                                                     | Chlorophyll a-b binding protein [IPRO22796] (1); Chlorophyll a-b binding protein domain [IPRO23229] (1); Pentatricopeptide repeat [IPRO22885] (1); Tetraatricopeptide-like helical domain [IPRO11990] (1); DYW domain [IPRO13267] (1)                                                                                                                                                                                                                     |                                 |                              | P_trifoliata_00033_mRNA_5.1     |
| GF0044125 | 0                            | 0                         | 0                            | 1 Pentatricopeptide repeat-containing family protein (1)                      | protein binding [GO:0005515 molecular_function] (1); zinc ion binding [GO:0008270 molecular_function] (1)                                                                                                                           | Pentatricopeptide repeat [IPRO22885] (1); Tetraatricopeptide-like helical domain [IPRO11990] (1); DYW domain [IPRO13267] (1)                                                                                                                                                                                                                                                                                                                              |                                 |                              | P_trifoliata_00033_mRNA_33.1    |
| GF0044124 | 0                            | 0                         | 0                            | 1 Hypothetical protein (1)                                                    |                                                                                                                                                                                                                                     |                                                                                                                                                                                                                                                                                                                                                                                                                                                           |                                 |                              | P_trifoliata_00033_mRNA_3.1     |
| GF0044123 | 0                            | 0                         | 0                            | 1 Hypothetical protein (1)                                                    |                                                                                                                                                                                                                                     |                                                                                                                                                                                                                                                                                                                                                                                                                                                           |                                 |                              | P_trifoliata_00033_mRNA_24.1    |
| GF0044122 | 0                            | 0                         | 0                            | 1 Hypothetical protein (1)                                                    |                                                                                                                                                                                                                                     | Dymecilin [IPRO19142] (1); Endonuclease/exonuclease/phosphatase [IPRO05135] (1)                                                                                                                                                                                                                                                                                                                                                                           |                                 |                              | P_trifoliata_00033_mRNA_2.1     |
| GF0044121 | 0                            | 0                         | 0                            | 1 Hypothetical protein (1)                                                    |                                                                                                                                                                                                                                     |                                                                                                                                                                                                                                                                                                                                                                                                                                                           |                                 |                              | P_trifoliata_00033_mRNA_17.1    |
| GF0044120 | 0                            | 0                         | 0                            | 1 Guanylate kinase (1)                                                        |                                                                                                                                                                                                                                     | Guanylate kinase/L-type calcium channel beta subunit [IPRO08145] (1); P-loop containing nucleoside triphosphate hydrolase [IPRO27417] (1); Guanylate kinase-like domain [IPRO08144] (1)                                                                                                                                                                                                                                                                   |                                 |                              | P_trifoliata_00033_mRNA_127.1   |
| GF0044119 | 0                            | 0                         | 0                            | 1 Hypothetical protein (1)                                                    |                                                                                                                                                                                                                                     | Retrorotavirus gag domain [IPRO05162] (1)                                                                                                                                                                                                                                                                                                                                                                                                                 |                                 |                              | P_trifoliata_00033_mRNA_120.1   |
| GF0044118 | 0                            | 0                         | 0                            | 1 Hypothetical protein (1)                                                    |                                                                                                                                                                                                                                     |                                                                                                                                                                                                                                                                                                                                                                                                                                                           |                                 |                              | P_trifoliata_00033_mRNA_118.1   |
| GF0044117 | 0                            | 0                         | 0                            | 1 Hypothetical protein (1)                                                    |                                                                                                                                                                                                                                     |                                                                                                                                                                                                                                                                                                                                                                                                                                                           |                                 |                              | P_trifoliata_00033_mRNA_116.1   |
| GF0044116 | 0                            | 0                         | 0                            | 1 Hypothetical protein (1)                                                    |                                                                                                                                                                                                                                     |                                                                                                                                                                                                                                                                                                                                                                                                                                                           |                                 |                              | P_trifoliata_00033_mRNA_115.1   |
| GF0044115 | 0                            | 0                         | 0                            | 1 Hypothetical protein (1)                                                    |                                                                                                                                                                                                                                     |                                                                                                                                                                                                                                                                                                                                                                                                                                                           |                                 |                              | P_trifoliata_00033_mRNA_108.1   |
| GF0044114 | 0                            | 0                         | 0                            | 1 Hypothetical protein (1)                                                    |                                                                                                                                                                                                                                     |                                                                                                                                                                                                                                                                                                                                                                                                                                                           |                                 |                              | P_trifoliata_00033_mRNA_107.1   |
| GF0044113 | 0                            | 0                         | 0                            | 1 Hypothetical protein (1)                                                    |                                                                                                                                                                                                                                     |                                                                                                                                                                                                                                                                                                                                                                                                                                                           |                                 |                              | P_trifoliata_00033_mRNA_104.1   |
| GF0044112 | 0                            | 0                         | 0                            | 1 Hypothetical protein (1)                                                    |                                                                                                                                                                                                                                     |                                                                                                                                                                                                                                                                                                                                                                                                                                                           |                                 |                              | P_trifoliata_00033_mRNA_103.1   |
| GF0044111 | 0                            | 0                         | 0                            | 1 Early light-induced protein, chloroplast (1)                                |                                                                                                                                                                                                                                     | Chlorophyll a-b binding protein domain [IPRO23229] (1); Sieve element occlusion, C-terminal [IPRO27944] (1); Sieve element occlusion, N-terminal [IPRO27942] (1); Aldolase-type TIM barrel [IPRO13783] (1); Glycosyl hydrolases 36 [IPRO08811] (1)                                                                                                                                                                                                        |                                 |                              | P_trifoliata_00033_mRNA_1.1     |
| GF0044110 | 0                            | 0                         | 0                            | 1 Acid phosphatase 1 (1)                                                      |                                                                                                                                                                                                                                     | Sieve element occlusion, C-terminal [IPRO27944] (1); Sieve element occlusion, N-terminal [IPRO27942] (1); Aldolase-type TIM barrel [IPRO13783] (1); Glycosyl hydrolases 36 [IPRO08811] (1)                                                                                                                                                                                                                                                                |                                 |                              | P_trifoliata_00032_mRNA_97.1    |
| GF0044109 | 0                            | 0                         | 0                            | 1 Hypothetical protein (1)                                                    | catalytic activity [GO:0003824 molecular_function] (1)                                                                                                                                                                              | Glyoxyl oxidase, N-terminal [IPRO09880] (1)                                                                                                                                                                                                                                                                                                                                                                                                               |                                 |                              | P_trifoliata_00032_mRNA_94.1    |
| GF0044108 | 0                            | 0                         | 0                            | 1 Hypothetical protein (1)                                                    |                                                                                                                                                                                                                                     |                                                                                                                                                                                                                                                                                                                                                                                                                                                           |                                 |                              | P_trifoliata_00032_mRNA_88.1    |
| GF0044107 | 0                            | 0                         | 0                            | 1 Terpene synthase 21, putative (1)                                           | magnesium ion binding [GO:0000287 molecular_function] (1); terpene synthase activity [GO:0010333 molecular_function] (1); lyase activity [GO:0016829 molecular_function] (1); metabolic process [GO:0008152 biological_process] (1) | Isoprenoid synthase domain [IPRO08949] (1); Terpenoid cyclases/protein prenyltransferase-alpha-alpha teroid [IPRO08930] (1); Terpene synthase, N-terminal domain [IPRO1906] (1); Terpene synthase, metal-binding domain [IPRO05630] (1)                                                                                                                                                                                                                   |                                 |                              | P_trifoliata_00032_mRNA_80.1    |
| GF0044106 | 0                            | 0                         | 0                            | 1 Hypothetical protein (1)                                                    |                                                                                                                                                                                                                                     |                                                                                                                                                                                                                                                                                                                                                                                                                                                           |                                 |                              | P_trifoliata_00032_mRNA_64.1    |
| GF0044105 | 0                            | 0                         | 0                            | 1 Hypothetical protein (1)                                                    |                                                                                                                                                                                                                                     |                                                                                                                                                                                                                                                                                                                                                                                                                                                           |                                 |                              | P_trifoliata_00032_mRNA_57.1    |
| GF0044104 | 0                            | 0                         | 0                            | 1 Hypothetical protein (1)                                                    | anaphase-promoting complex [GO:0005680 cellular_component] (1); regulation of mitotic cell cycle spindle assembly checkpoint [GO:0090266 biological_process] (1)                                                                    | Anaphase-promoting complex subunit 15 [IPRO26182] (1)                                                                                                                                                                                                                                                                                                                                                                                                     |                                 |                              | P_trifoliata_00032_mRNA_56.1    |
| GF0044103 | 0                            | 0                         | 0                            | 1 Armadillo repeat only 2 protein (1)                                         | binding [GO:0005488 molecular_function] (1); protein binding [GO:0005515 molecular_function] (1)                                                                                                                                    | Armadillo-like helical [IPRO11989] (1); Armadillo [IPRO00225] (1); Armadillo-type fold [IPRO16024] (1)                                                                                                                                                                                                                                                                                                                                                    |                                 |                              | P_trifoliata_00032_mRNA_48.1    |
| GF0044102 | 0                            | 0                         | 0                            | 1 Hypothetical protein (1)                                                    |                                                                                                                                                                                                                                     |                                                                                                                                                                                                                                                                                                                                                                                                                                                           |                                 |                              | P_trifoliata_00032_mRNA_112.1   |
| GF0044101 | 0                            | 0                         | 0                            | 1 Peptidase C78, ubiquitin fold modifier-specific peptidase 1/2 isoform 1 (1) |                                                                                                                                                                                                                                     | Pentatricopeptide repeat [IPRO22885] (1); Peptidase C78, ubiquitin fold modifier-specific peptidase 1/2 [IPRO12462] (1); Sieve element occlusion, N-terminal [IPRO27942] (1)                                                                                                                                                                                                                                                                              |                                 |                              | P_trifoliata_00032_mRNA_108.1   |
| GF0044100 | 0                            | 0                         | 0                            | 1 Hypothetical protein (1)                                                    |                                                                                                                                                                                                                                     |                                                                                                                                                                                                                                                                                                                                                                                                                                                           |                                 |                              | P_trifoliata_00032_mRNA_102.1   |
| GF0044099 | 0                            | 0                         | 0                            | 1 Hypothetical protein (1)                                                    |                                                                                                                                                                                                                                     |                                                                                                                                                                                                                                                                                                                                                                                                                                                           |                                 |                              | P_trifoliata_00031_mRNA_99.1    |
| GF0044098 | 0                            | 0                         | 0                            | 1 Hypothetical protein (1)                                                    |                                                                                                                                                                                                                                     |                                                                                                                                                                                                                                                                                                                                                                                                                                                           |                                 |                              | P_trifoliata_00031_mRNA_94.1    |
| GF0044097 | 0                            | 0                         | 0                            | 1 Bifunctional dihydroflavonol 4-reductase/flavonone 4-reductase (1)          | coenzyme binding [GO:0050662 molecular_function] (1); catalytic activity [GO:0003824 molecular_function] (1)                                                                                                                        | NAD-dependent epimerase/dehydratase, N-terminal domain [IPRO01509] (1); NAD(P)-binding domain [IPRO16040] (1)                                                                                                                                                                                                                                                                                                                                             |                                 |                              | P_trifoliata_00031_mRNA_81.1    |

| ID        | Num. in <i>C. clementiae</i> | Num. in <i>C. canihii</i> | Num. in <i>P. trifoliata</i> | Note                                                             | GO                                                                                                                                                                                                                                                                                                                    | InterPro                                                                                                                                                                                                                                                                                                                  | Members in <i>C. clementiae</i> | Members in <i>C. canihii</i> | Members in <i>P. trifoliata</i> |
|-----------|------------------------------|---------------------------|------------------------------|------------------------------------------------------------------|-----------------------------------------------------------------------------------------------------------------------------------------------------------------------------------------------------------------------------------------------------------------------------------------------------------------------|---------------------------------------------------------------------------------------------------------------------------------------------------------------------------------------------------------------------------------------------------------------------------------------------------------------------------|---------------------------------|------------------------------|---------------------------------|
| GF0044096 | 0                            | 0                         | 1                            | Hypothetical protein (1)                                         | zinc ion binding [GO:0008270 molecular_function] (1); protein binding [GO:0005515 molecular_function] (1)                                                                                                                                                                                                             | Zinc finger, RING-type [IPR001841] (1); Zinc finger, RING/YVY/PHD-type [IPR013083] (1)                                                                                                                                                                                                                                    | -                               | -                            | P_trifoliata_00031_mRNA_7,1     |
| GF0044095 | 0                            | 0                         | 1                            | Hypothetical protein (1)                                         | -                                                                                                                                                                                                                                                                                                                     | -                                                                                                                                                                                                                                                                                                                         | -                               | -                            | P_trifoliata_00031_mRNA_60,1    |
| GF0044094 | 0                            | 0                         | 1                            | Hypothetical protein (1)                                         | -                                                                                                                                                                                                                                                                                                                     | -                                                                                                                                                                                                                                                                                                                         | -                               | -                            | P_trifoliata_00031_mRNA_58,1    |
| GF0044093 | 0                            | 0                         | 1                            | Transcription factor HBP-1b(C1) (1)                              | transcription factor activity, sequence-specific DNA binding [GO:0005700 molecular_function] (1); regulation of transcription, DNA-templated [GO:0006355 biological_process] (1); sequence-specific DNA binding [GO:0043565 molecular_function] (1); transcription, DNA-templated [GO:0006351 biological_process] (1) | Basic-leucine zipper domain [IPR004827] (1); Transcription factor TGA-like domain [IPR025422] (1)                                                                                                                                                                                                                         | -                               | -                            | P_trifoliata_00031_mRNA_54,1    |
| GF0044092 | 0                            | 0                         | 1                            | Hypothetical protein (1)                                         | -                                                                                                                                                                                                                                                                                                                     | -                                                                                                                                                                                                                                                                                                                         | -                               | -                            | P_trifoliata_00031_mRNA_4,1     |
| GF0044091 | 0                            | 0                         | 1                            | Hypothetical protein (1)                                         | -                                                                                                                                                                                                                                                                                                                     | -                                                                                                                                                                                                                                                                                                                         | -                               | -                            | P_trifoliata_00031_mRNA_35,1    |
| GF0044090 | 0                            | 0                         | 1                            | Hypothetical protein (1)                                         | -                                                                                                                                                                                                                                                                                                                     | -                                                                                                                                                                                                                                                                                                                         | -                               | -                            | P_trifoliata_00031_mRNA_34,1    |
| GF0044089 | 0                            | 0                         | 1                            | Hypothetical protein (1)                                         | -                                                                                                                                                                                                                                                                                                                     | -                                                                                                                                                                                                                                                                                                                         | -                               | -                            | P_trifoliata_00031_mRNA_3,1     |
| GF0044088 | 0                            | 0                         | 1                            | Phosphate transporter PHO1-like protein (1)                      | integral component of membrane [GO:0016021 cellular_component] (1)                                                                                                                                                                                                                                                    | EXS, C-terminal [IPR004342] (1)                                                                                                                                                                                                                                                                                           | -                               | -                            | P_trifoliata_00031_mRNA_14,1    |
| GF0044087 | 0                            | 0                         | 1                            | Hypothetical protein (1)                                         | -                                                                                                                                                                                                                                                                                                                     | Domain of unknown function DUF630 [IPR006868] (1)                                                                                                                                                                                                                                                                         | -                               | -                            | P_trifoliata_00031_mRNA_98,1    |
| GF0044086 | 0                            | 0                         | 1                            | DUF241 domain protein (1)                                        | -                                                                                                                                                                                                                                                                                                                     | Protein of unknown function DUF241, plant [IPR004320] (1)                                                                                                                                                                                                                                                                 | -                               | -                            | P_trifoliata_00030_mRNA_92,1    |
| GF0044085 | 0                            | 0                         | 1                            | BRCA1-A complex subunit BRE (1)                                  | -                                                                                                                                                                                                                                                                                                                     | Brain retroviral origin-expressed protein [IPR010358] (1)                                                                                                                                                                                                                                                                 | -                               | -                            | P_trifoliata_00030_mRNA_9,1     |
| GF0044084 | 0                            | 0                         | 1                            | Cytoplasmic rRNA 2-thiolation protein 1 (1)                      | tRNA processing [GO:0008033 biological_process] (1); rRNA wobble uridine modification [GO:0002998 biological_process] (1); rRNA thio-modification [GO:0034227 biological_process] (1); rRNA binding [GO:0000049 molecular_function] (1)                                                                               | Cytoplasmic rRNA 2-thiolation protein 1 [IPR000541] (1); 2-thiocytidine rRNA biosynthesis protein, TcaA [IPR012089] (1); rRNA(hc)-lysine/2-thiocytidine synthase, N-terminal [IPR011063] (1); Cytoplasmic rRNA 2-thiolation protein 1, C-terminal [IPR032442] (1); Rossmann-like alpha/beta sandwich fold [IPR014729] (1) | -                               | -                            | P_trifoliata_00030_mRNA_83,1    |
| GF0044083 | 0                            | 0                         | 1                            | Hypothetical protein (1)                                         | -                                                                                                                                                                                                                                                                                                                     | -                                                                                                                                                                                                                                                                                                                         | -                               | -                            | P_trifoliata_00030_mRNA_73,1    |
| GF0044082 | 0                            | 0                         | 1                            | Hypothetical protein (1)                                         | -                                                                                                                                                                                                                                                                                                                     | Root cap [IPR009646] (1)                                                                                                                                                                                                                                                                                                  | -                               | -                            | P_trifoliata_00030_mRNA_72,1    |
| GF0044081 | 0                            | 0                         | 1                            | E3 ubiquitin-protein ligase UPL3-like protein (1)                | -                                                                                                                                                                                                                                                                                                                     | Thioredoxin-like fold [IPR012336] (1)                                                                                                                                                                                                                                                                                     | -                               | -                            | P_trifoliata_00030_mRNA_54,1    |
| GF0044080 | 0                            | 0                         | 1                            | ER lumen protein retaining receptor (1)                          | protein retention in ER lumen [GO:0006621 biological_process] (1); ER retention sequence binding [GO:0046923 molecular_function] (1); integral component of membrane [GO:0016021 cellular_component] (1)                                                                                                              | ER lumen protein retaining receptor [IPR000133] (1)                                                                                                                                                                                                                                                                       | -                               | -                            | P_trifoliata_00030_mRNA_5,1     |
| GF0044079 | 0                            | 0                         | 1                            | Hypothetical protein (1)                                         | -                                                                                                                                                                                                                                                                                                                     | RGS domain [IPR016137] (1)                                                                                                                                                                                                                                                                                                | -                               | -                            | P_trifoliata_00030_mRNA_4,1     |
| GF0044078 | 0                            | 0                         | 1                            | GDSL esterase/lipase EXL3 (1)                                    | hydrolase activity, acting on ester bonds [GO:0016788 molecular_function] (1)                                                                                                                                                                                                                                         | GDSL lipase/esterase [IPR001087] (1); SGNH1 hydrolase-type esterase domain [IPR013830] (1)                                                                                                                                                                                                                                | -                               | -                            | P_trifoliata_00030_mRNA_39,1    |
| GF0044077 | 0                            | 0                         | 1                            | Hypothetical protein (1)                                         | -                                                                                                                                                                                                                                                                                                                     | -                                                                                                                                                                                                                                                                                                                         | -                               | -                            | P_trifoliata_00030_mRNA_136,1   |
| GF0044076 | 0                            | 0                         | 1                            | Hypothetical protein (1)                                         | -                                                                                                                                                                                                                                                                                                                     | -                                                                                                                                                                                                                                                                                                                         | -                               | -                            | P_trifoliata_00030_mRNA_135,1   |
| GF0044075 | 0                            | 0                         | 1                            | Hypothetical protein (1)                                         | -                                                                                                                                                                                                                                                                                                                     | -                                                                                                                                                                                                                                                                                                                         | -                               | -                            | P_trifoliata_00030_mRNA_134,1   |
| GF0044074 | 0                            | 0                         | 1                            | Hypothetical protein (1)                                         | -                                                                                                                                                                                                                                                                                                                     | -                                                                                                                                                                                                                                                                                                                         | -                               | -                            | P_trifoliata_00030_mRNA_133,1   |
| GF0044073 | 0                            | 0                         | 1                            | Hypothetical protein (1)                                         | -                                                                                                                                                                                                                                                                                                                     | -                                                                                                                                                                                                                                                                                                                         | -                               | -                            | P_trifoliata_00030_mRNA_125,1   |
| GF0044072 | 0                            | 0                         | 1                            | Ankyrin repeat family protein (1)                                | protein binding [GO:0005515 molecular_function] (1)                                                                                                                                                                                                                                                                   | Ankyrin repeat [IPR002110] (1); Ankyrin repeat-containing domain [IPR020683] (1)                                                                                                                                                                                                                                          | -                               | -                            | P_trifoliata_00030_mRNA_121,1   |
| GF0044071 | 0                            | 0                         | 1                            | Hypothetical protein (1)                                         | -                                                                                                                                                                                                                                                                                                                     | -                                                                                                                                                                                                                                                                                                                         | -                               | -                            | P_trifoliata_00030_mRNA_117,1   |
| GF0044070 | 0                            | 0                         | 1                            | Hypothetical protein (1)                                         | -                                                                                                                                                                                                                                                                                                                     | -                                                                                                                                                                                                                                                                                                                         | -                               | -                            | P_trifoliata_00030_mRNA_114,1   |
| GF0044069 | 0                            | 0                         | 1                            | Hypothetical protein (1)                                         | -                                                                                                                                                                                                                                                                                                                     | -                                                                                                                                                                                                                                                                                                                         | -                               | -                            | P_trifoliata_00030_mRNA_110,1   |
| GF0044068 | 0                            | 0                         | 1                            | Hypothetical protein (1)                                         | protein binding [GO:0005515 molecular_function] (1)                                                                                                                                                                                                                                                                   | Ankyrin repeat [IPR002110] (1); Ankyrin repeat-containing domain [IPR020683] (1)                                                                                                                                                                                                                                          | -                               | -                            | P_trifoliata_00030_mRNA_109,1   |
| GF0044067 | 0                            | 0                         | 1                            | Hypothetical protein (1)                                         | nucleic acid binding [GO:0003676 molecular_function] (1); protein dimerization activity [GO:0040983 molecular_function] (1); response to stress [GO:00006950 biological_process] (1)                                                                                                                                  | HAT, C-terminal dimerisation domain [IPR008900] (1); UsaA [IPR0006016] (1); Rossmann-like alpha/beta-alpha sandwich fold [IPR014729] (1); Ribonuclease H-like domain [IPR012337] (1)                                                                                                                                      | -                               | -                            | P_trifoliata_00030_mRNA_103,1   |
| GF0044066 | 0                            | 0                         | 1                            | Hypothetical protein (1)                                         | -                                                                                                                                                                                                                                                                                                                     | -                                                                                                                                                                                                                                                                                                                         | -                               | -                            | P_trifoliata_00029_mRNA_95,1    |
| GF0044065 | 0                            | 0                         | 1                            | Hypothetical protein (1)                                         | -                                                                                                                                                                                                                                                                                                                     | -                                                                                                                                                                                                                                                                                                                         | -                               | -                            | P_trifoliata_00029_mRNA_93,1    |
| GF0044064 | 0                            | 0                         | 1                            | Hypothetical protein (1)                                         | -                                                                                                                                                                                                                                                                                                                     | Ankyrin repeat-containing domain [IPR020683] (1)                                                                                                                                                                                                                                                                          | -                               | -                            | P_trifoliata_00029_mRNA_92,1    |
| GF0044063 | 0                            | 0                         | 1                            | Ankyrin repeat protein (1)                                       | protein binding [GO:0005515 molecular_function] (1)                                                                                                                                                                                                                                                                   | Ankyrin repeat [IPR002110] (1); Ankyrin repeat-containing domain [IPR020683] (1); POG domain [IPR026961] (1)                                                                                                                                                                                                              | -                               | -                            | P_trifoliata_00029_mRNA_91,1    |
| GF0044062 | 0                            | 0                         | 1                            | Hypothetical protein (1)                                         | -                                                                                                                                                                                                                                                                                                                     | -                                                                                                                                                                                                                                                                                                                         | -                               | -                            | P_trifoliata_00029_mRNA_89,1    |
| GF0044061 | 0                            | 0                         | 1                            | Hypothetical protein (1)                                         | -                                                                                                                                                                                                                                                                                                                     | -                                                                                                                                                                                                                                                                                                                         | -                               | -                            | P_trifoliata_00029_mRNA_88,1    |
| GF0044060 | 0                            | 0                         | 1                            | Hypothetical protein (1)                                         | -                                                                                                                                                                                                                                                                                                                     | -                                                                                                                                                                                                                                                                                                                         | -                               | -                            | P_trifoliata_00029_mRNA_85,1    |
| GF0044059 | 0                            | 0                         | 1                            | Hypothetical protein (1)                                         | -                                                                                                                                                                                                                                                                                                                     | -                                                                                                                                                                                                                                                                                                                         | -                               | -                            | P_trifoliata_00029_mRNA_77,1    |
| GF0044058 | 0                            | 0                         | 1                            | Hypothetical protein (1)                                         | -                                                                                                                                                                                                                                                                                                                     | -                                                                                                                                                                                                                                                                                                                         | -                               | -                            | P_trifoliata_00029_mRNA_76,1    |
| GF0044057 | 0                            | 0                         | 1                            | Hypothetical protein (1)                                         | -                                                                                                                                                                                                                                                                                                                     | -                                                                                                                                                                                                                                                                                                                         | -                               | -                            | P_trifoliata_00029_mRNA_75,1    |
| GF0044056 | 0                            | 0                         | 1                            | Hypothetical protein (1)                                         | -                                                                                                                                                                                                                                                                                                                     | Pentatricopeptide repeat [IPR002885] (1)                                                                                                                                                                                                                                                                                  | -                               | -                            | P_trifoliata_00029_mRNA_73,1    |
| GF0044055 | 0                            | 0                         | 1                            | Hypothetical protein (1)                                         | -                                                                                                                                                                                                                                                                                                                     | -                                                                                                                                                                                                                                                                                                                         | -                               | -                            | P_trifoliata_00029_mRNA_72,1    |
| GF0044054 | 0                            | 0                         | 1                            | Hypothetical protein (1)                                         | nutrient reservoir activity [GO:0045735 molecular_function] (1); manganese ion binding [GO:0030145 molecular_function] (1)                                                                                                                                                                                            | RanC-like jelly roll fold [IPR014710] (1); Cupin [IPR006045] (1); Germin, manganese binding site [IPR019780] (1); RanC-like cupin domain [IPR011051] (1)                                                                                                                                                                  | -                               | -                            | P_trifoliata_00029_mRNA_70,1    |
| GF0044053 | 0                            | 0                         | 1                            | Pentatricopeptide repeat (PPR) superfamily protein, putative (1) | -                                                                                                                                                                                                                                                                                                                     | Pentatricopeptide repeat [IPR002885] (1)                                                                                                                                                                                                                                                                                  | -                               | -                            | P_trifoliata_00029_mRNA_67,1    |
| GF0044052 | 0                            | 0                         | 1                            | Hypothetical protein (1)                                         | -                                                                                                                                                                                                                                                                                                                     | -                                                                                                                                                                                                                                                                                                                         | -                               | -                            | P_trifoliata_00029_mRNA_64,1    |
| GF0044051 | 0                            | 0                         | 1                            | Hypothetical protein (1)                                         | -                                                                                                                                                                                                                                                                                                                     | -                                                                                                                                                                                                                                                                                                                         | -                               | -                            | P_trifoliata_00029_mRNA_63,1    |
| GF0044050 | 0                            | 0                         | 1                            | Hypothetical protein (1)                                         | -                                                                                                                                                                                                                                                                                                                     | -                                                                                                                                                                                                                                                                                                                         | -                               | -                            | P_trifoliata_00029_mRNA_61,1    |
| GF0044049 | 0                            | 0                         | 1                            | Hypothetical protein (1)                                         | -                                                                                                                                                                                                                                                                                                                     | -                                                                                                                                                                                                                                                                                                                         | -                               | -                            | P_trifoliata_00029_mRNA_60,1    |
| GF0044048 | 0                            | 0                         | 1                            | Hypothetical protein (1)                                         | hydrolase activity [GO:0016787 molecular_function] (1)                                                                                                                                                                                                                                                                | Alpha/Beta hydrolase fold [IPR029058] (1); Dieneolone hydrolase [IPR0002925] (1)                                                                                                                                                                                                                                          | -                               | -                            | P_trifoliata_00029_mRNA_5,1     |
| GF0044047 | 0                            | 0                         | 1                            | Hypothetical protein (1)                                         | -                                                                                                                                                                                                                                                                                                                     | -                                                                                                                                                                                                                                                                                                                         | -                               | -                            | P_trifoliata_00029_mRNA_43,1    |
| GF0044046 | 0                            | 0                         | 1                            | Hypothetical protein (1)                                         | chromatin binding [GO:0003682 molecular_function] (1)                                                                                                                                                                                                                                                                 | Bromo adjacent homology (BAH) domain [IPR010251] (1)                                                                                                                                                                                                                                                                      | -                               | -                            | P_trifoliata_00029_mRNA_42,1    |
| GF0044045 | 0                            | 0                         | 1                            | Hypothetical protein (1)                                         | chromatin binding [GO:0003682 molecular_function] (1)                                                                                                                                                                                                                                                                 | Bromo adjacent homology (BAH) domain [IPR010251] (1); S-adenosyl-L-methionine-dependent methyltransferase [IPR029063] (1)                                                                                                                                                                                                 | -                               | -                            | P_trifoliata_00029_mRNA_41,1    |
| GF0044044 | 0                            | 0                         | 1                            | Hypothetical protein (1)                                         | -                                                                                                                                                                                                                                                                                                                     | -                                                                                                                                                                                                                                                                                                                         | -                               | -                            | P_trifoliata_00029_mRNA_40,1    |
| GF0044043 | 0                            | 0                         | 1                            | Putative disease resistance protein RGA1 (1)                     | -                                                                                                                                                                                                                                                                                                                     | Leucine-rich repeat domain, L domain-like [IPR032675] (1)                                                                                                                                                                                                                                                                 | -                               | -                            | P_trifoliata_00029_mRNA_39,1    |
| GF0044042 | 0                            | 0                         | 1                            | Hypothetical protein (1)                                         | -                                                                                                                                                                                                                                                                                                                     | S-adenosyl-L-methionine-dependent methyltransferase [IPR029063] (1)                                                                                                                                                                                                                                                       | -                               | -                            | P_trifoliata_00029_mRNA_38,1    |
| GF0044041 | 0                            | 0                         | 1                            | Hypothetical protein (1)                                         | -                                                                                                                                                                                                                                                                                                                     | Leucine-rich repeat domain, L domain-like [IPR032675] (1); P-loop containing nucleoside triphosphate hydrolase [IPR027417] (1)                                                                                                                                                                                            | -                               | -                            | P_trifoliata_00029_mRNA_37,1    |
| GF0044040 | 0                            | 0                         | 1                            | Hypothetical protein (1)                                         | -                                                                                                                                                                                                                                                                                                                     | Leucine-rich repeat domain, L domain-like [IPR032675] (1)                                                                                                                                                                                                                                                                 | -                               | -                            | P_trifoliata_00029_mRNA_36,1    |
| GF0044039 | 0                            | 0                         | 1                            | Hypothetical protein (1)                                         | -                                                                                                                                                                                                                                                                                                                     | -                                                                                                                                                                                                                                                                                                                         | -                               | -                            | P_trifoliata_00029_mRNA_35,1    |
| GF0044038 | 0                            | 0                         | 1                            | Hypothetical protein (1)                                         | catalytic activity [GO:0003824 molecular_function] (1)                                                                                                                                                                                                                                                                | Pyridoxal phosphate-dependent transferase, major region, subdomain 1 [IPR015421] (1); Pyridoxal phosphate-dependent transferase [IPR015424] (1)                                                                                                                                                                           | -                               | -                            | P_trifoliata_00029_mRNA_34,1    |
| GF0044037 | 0                            | 0                         | 1                            | Hypothetical protein (1)                                         | chromatin binding [GO:0003682 molecular_function] (1)                                                                                                                                                                                                                                                                 | Bromo adjacent homology (BAH) domain [IPR010251] (1)                                                                                                                                                                                                                                                                      | -                               | -                            | P_trifoliata_00029_mRNA_33,1    |
| GF0044036 | 0                            | 0                         | 1                            | Hypothetical protein (1)                                         | -                                                                                                                                                                                                                                                                                                                     | -                                                                                                                                                                                                                                                                                                                         | -                               | -                            | P_trifoliata_00029_mRNA_32,1    |
| GF0044035 | 0                            | 0                         | 1                            | Hypothetical protein (1)                                         | -                                                                                                                                                                                                                                                                                                                     | -                                                                                                                                                                                                                                                                                                                         | -                               | -                            | P_trifoliata_00029_mRNA_30,1    |
| GF0044034 | 0                            | 0                         | 1                            | Hypothetical protein (1)                                         | -                                                                                                                                                                                                                                                                                                                     | -                                                                                                                                                                                                                                                                                                                         | -                               | -                            | P_trifoliata_00029_mRNA_27,1    |
| GF0044033 | 0                            | 0                         | 1                            | Hypothetical protein (1)                                         | -                                                                                                                                                                                                                                                                                                                     | Retrosposon gag domain [IPR005162] (1)                                                                                                                                                                                                                                                                                    | -                               | -                            | P_trifoliata_00029_mRNA_26,1    |
| GF0044032 | 0                            | 0                         | 1                            | Hypothetical protein (1)                                         | -                                                                                                                                                                                                                                                                                                                     | Protein kinase domain [IPR000719] (1); Protein kinase-like domain [IPR011009] (1); Serine/threonine-protein kinase, active site [IPR008271] (1); Retrosposon gag domain [IPR005162] (1); Serine/threonine/dual specificity protein kinase, catalytic domain [IPR002290] (1)                                               | -                               | -                            | P_trifoliata_00029_mRNA_23,1    |
| GF0044031 | 0                            | 0                         | 1                            | Hypothetical protein (1)                                         | protein phosphorylation [GO:0006668 biological_process] (1); protein kinase activity [GO:0004672 molecular_function] (1); ATP binding [GO:0005524 molecular_function] (1)                                                                                                                                             | Retrosposon gag domain [IPR005162] (1); Serine/threonine/dual specificity protein kinase, catalytic domain [IPR002290] (1)                                                                                                                                                                                                | -                               | -                            | P_trifoliata_00029_mRNA_2,1     |
| GF0044030 | 0                            | 0                         | 1                            | UDP-glycosyltransferase 74B1 (1)                                 | transferase activity, transferring hexosyl groups [GO:0016758 molecular_function] (1); metabolic process [GO:0008152 biological_process] (1)                                                                                                                                                                          | UDP-glucuronosylUDP-glycosyltransferase [IPR002213] (1)                                                                                                                                                                                                                                                                   | -                               | -                            | P_trifoliata_00029_mRNA_18,1    |
| GF0044029 | 0                            | 0                         | 1                            | Hypothetical protein (1)                                         | -                                                                                                                                                                                                                                                                                                                     | -                                                                                                                                                                                                                                                                                                                         | -                               | -                            | P_trifoliata_00029_mRNA_17,1    |
| GF0044028 | 0                            | 0                         | 1                            | Hypothetical protein (1)                                         | -                                                                                                                                                                                                                                                                                                                     | -                                                                                                                                                                                                                                                                                                                         | -                               | -                            | P_trifoliata_00029_mRNA_16,1    |
| GF0044027 | 0                            | 0                         | 1                            | Hypothetical protein (1)                                         | -                                                                                                                                                                                                                                                                                                                     | -                                                                                                                                                                                                                                                                                                                         | -                               | -                            | P_trifoliata_00029_mRNA_15,1    |

| ID        | Num. in <i>C. clementiae</i> | Num. in <i>C. anthra</i> | Num. in <i>P. trifoliata</i> | Note                                                     | GO                                                                                                                                                                                                                                                                                                                                                                                                                                       | InterPro                                                                                                                                                                                                                                                                                                                                 | Members in <i>C. clementiae</i> | Members in <i>C. anthra</i> | Members in <i>P. trifoliata</i> |
|-----------|------------------------------|--------------------------|------------------------------|----------------------------------------------------------|------------------------------------------------------------------------------------------------------------------------------------------------------------------------------------------------------------------------------------------------------------------------------------------------------------------------------------------------------------------------------------------------------------------------------------------|------------------------------------------------------------------------------------------------------------------------------------------------------------------------------------------------------------------------------------------------------------------------------------------------------------------------------------------|---------------------------------|-----------------------------|---------------------------------|
| GF0044026 | 0                            | 0                        | 1                            | Hypothetical protein (1)                                 | protein folding [GO:0006457 biological_process] (1)                                                                                                                                                                                                                                                                                                                                                                                      | Peptidyl-prolyl cis-trans isomerase, FKBP-type [IPRO23566] (1); FKBP-type peptidyl-prolyl cis-trans isomerase domain [IPRO01179] (1)                                                                                                                                                                                                     | -                               | -                           | P_trifoliata_00029_mRNA_14,1    |
| GF0044025 | 0                            | 0                        | 1                            | Hypothetical protein (1)                                 | protein dimerization activity [GO:0046983 molecular_function] (1)                                                                                                                                                                                                                                                                                                                                                                        | Myo-type, basic helix-loop-helix (bHLH) domain [IPRO11598] (1)                                                                                                                                                                                                                                                                           | -                               | -                           | P_trifoliata_00029_mRNA_12,1    |
| GF0044024 | 0                            | 0                        | 1                            | Hypothetical protein (1)                                 | protein dimerization activity [GO:0046983 molecular_function] (1)                                                                                                                                                                                                                                                                                                                                                                        | Myo-type, basic helix-loop-helix (bHLH) domain [IPRO11598] (1)                                                                                                                                                                                                                                                                           | -                               | -                           | P_trifoliata_00029_mRNA_11,1    |
| GF0044023 | 0                            | 0                        | 1                            | Translocan at the outer envelope membrane of protein (1) | GTP binding [GO:0005525 molecular_function] (1)                                                                                                                                                                                                                                                                                                                                                                                          | P-loop containing nucleoside triphosphate hydrolase [IPRO27417] (1); AIC1-type guanine nucleotide-binding (G) domain [IPRO6703] (1)                                                                                                                                                                                                      | -                               | -                           | P_trifoliata_00028_mRNA_80,1    |
| GF0044022 | 0                            | 0                        | 1                            | Hypothetical protein (1)                                 |                                                                                                                                                                                                                                                                                                                                                                                                                                          |                                                                                                                                                                                                                                                                                                                                          | -                               | -                           | P_trifoliata_00028_mRNA_67,1    |
| GF0044021 | 0                            | 0                        | 1                            | Hypothetical protein (1)                                 |                                                                                                                                                                                                                                                                                                                                                                                                                                          |                                                                                                                                                                                                                                                                                                                                          | -                               | -                           | P_trifoliata_00028_mRNA_63,1    |
| GF0044020 | 0                            | 0                        | 1                            | Hypothetical protein (1)                                 |                                                                                                                                                                                                                                                                                                                                                                                                                                          |                                                                                                                                                                                                                                                                                                                                          | -                               | -                           | P_trifoliata_00028_mRNA_52,1    |
| GF0044019 | 0                            | 0                        | 1                            | Porphobilinogen deaminase, chloroplast (1)               | peptidyl-glyoxymethane cofactor linkage [GO:001160 biological_process] (1); tetrapyrrole biosynthetic process [GO:003304 biological_process] (1); hydroxymethylbilane synthase activity [GO:0004418 molecular_function] (1)                                                                                                                                                                                                              | Porphobilinogen deaminase [IPRO00860] (1); Porphobilinogen deaminase, C-terminal [IPRO22418] (1); Porphobilinogen deaminase, N-terminal [IPRO22417] (1); Porphobilinogen deaminase, dipyrromethane cofactor binding site [IPRO22419] (1)                                                                                                 | -                               | -                           | P_trifoliata_00028_mRNA_48,1    |
| GF0044018 | 0                            | 0                        | 1                            | Hypothetical protein (1)                                 |                                                                                                                                                                                                                                                                                                                                                                                                                                          |                                                                                                                                                                                                                                                                                                                                          | -                               | -                           | P_trifoliata_00028_mRNA_42,1    |
| GF0044017 | 0                            | 0                        | 1                            | Hypothetical protein (1)                                 | ADP binding [GO:0043531 molecular_function] (1); protein binding [GO:0005515 molecular_function] (1)                                                                                                                                                                                                                                                                                                                                     | Leucine-rich repeat, typical subtype [IPRO0359] (1); Leucine-rich repeat domain, L domain-like [IPRO32675] (1); P-loop containing nucleoside triphosphate hydrolase [IPRO27417] (1); NB-ARC [IPRO2152] (1); AAA-ATPase domain [IPRO03593] (1); Leucine-rich repeat [IPRO0161] (1)                                                        | -                               | -                           | P_trifoliata_00028_mRNA_40,1    |
| GF0044016 | 0                            | 0                        | 1                            | Hypothetical protein (1)                                 |                                                                                                                                                                                                                                                                                                                                                                                                                                          |                                                                                                                                                                                                                                                                                                                                          | -                               | -                           | P_trifoliata_00028_mRNA_39,1    |
| GF0044015 | 0                            | 0                        | 1                            | Disease resistance RPS5-like protein (1)                 | protein binding [GO:0005515 molecular_function] (1)                                                                                                                                                                                                                                                                                                                                                                                      | Leucine-rich repeat domain, L domain-like [IPRO32675] (1); Leucine-rich repeat [IPRO0161] (1)                                                                                                                                                                                                                                            | -                               | -                           | P_trifoliata_00028_mRNA_33,1    |
| GF0044014 | 0                            | 0                        | 1                            | Hypothetical protein (1)                                 | nucleic acid binding [GO:0003676 molecular_function] (1)                                                                                                                                                                                                                                                                                                                                                                                 | Ribonuclease H-like domain [IPRO12337] (1)                                                                                                                                                                                                                                                                                               | -                               | -                           | P_trifoliata_00028_mRNA_31,1    |
| GF0044013 | 0                            | 0                        | 1                            | Disease resistance protein family (1)                    |                                                                                                                                                                                                                                                                                                                                                                                                                                          |                                                                                                                                                                                                                                                                                                                                          | -                               | -                           | P_trifoliata_00028_mRNA_30,1    |
| GF0044012 | 0                            | 0                        | 1                            | Disease resistance protein (1)                           | ADP binding [GO:0043531 molecular_function] (1)                                                                                                                                                                                                                                                                                                                                                                                          | NB-ARC [IPRO2152] (1); P-loop containing nucleoside triphosphate hydrolase [IPRO27417] (1)                                                                                                                                                                                                                                               | -                               | -                           | P_trifoliata_00028_mRNA_28,1    |
| GF0044011 | 0                            | 0                        | 1                            | Putative serine/threonine-protein kinase NAK (1)         | ATP binding [GO:0005524 molecular_function] (1); protein kinase activity [GO:000472 molecular_function] (1); protein phosphorylation [GO:0006468 biological_process] (1)                                                                                                                                                                                                                                                                 | Protein kinase domain [IPRO00719] (1); Protein kinase-like domain [IPRO11009] (1); Concavallin A-like lectin-glycosylase domain [IPRO13320] (1); Protein kinase, ATP binding site [IPRO1744] (1); Serine/threonine-protein kinase, active site [IPRO0827] (1); Serine/threonine/tyrosine-protein kinase catalytic domain [IPRO01245] (1) | -                               | -                           | P_trifoliata_00028_mRNA_131,1   |
| GF0044010 | 0                            | 0                        | 1                            | 16 kDa. phloem protein 2 (1)                             | protein binding [GO:0005515 molecular_function] (1)                                                                                                                                                                                                                                                                                                                                                                                      | C2 domain [IPRO00008] (1)                                                                                                                                                                                                                                                                                                                | -                               | -                           | P_trifoliata_00028_mRNA_128,1   |
| GF0044009 | 0                            | 0                        | 1                            | Hypothetical protein (1)                                 |                                                                                                                                                                                                                                                                                                                                                                                                                                          |                                                                                                                                                                                                                                                                                                                                          | -                               | -                           | P_trifoliata_00028_mRNA_102,1   |
| GF0044008 | 0                            | 0                        | 1                            | Hypothetical protein (1)                                 |                                                                                                                                                                                                                                                                                                                                                                                                                                          |                                                                                                                                                                                                                                                                                                                                          | -                               | -                           | P_trifoliata_00028_mRNA_101,1   |
| GF0044007 | 0                            | 0                        | 1                            | Senescence-related gene 1 (1)                            | oxidoreductase activity [GO:0016491 molecular_function] (1); oxidation-reduction process [GO:005514 biological_process] (1)                                                                                                                                                                                                                                                                                                              | Peptidase S8 propeptide/proteinase inhibitor 19 [IPRO10259] (1); Non-haem doxxygenase N-terminal domain [IPRO26992] (1); Isopenicillin N synthase-like [IPRO27443] (1); Oxoglutarate-iron-dependent dioxygenase [IPRO0512] (1)                                                                                                           | -                               | -                           | P_trifoliata_00027_mRNA_99,1    |
| GF0044006 | 0                            | 0                        | 1                            | Hypothetical protein (1)                                 | membrane [GO:0016020 cellular_component] (1); transport [GO:0006810 biological_process] (1); transporter activity [GO:0005215 molecular_function] (1)                                                                                                                                                                                                                                                                                    | Proton-dependent oligopeptide transporter family [IPRO00109] (1); Major facilitator superfamily domain [IPRO20846] (1)                                                                                                                                                                                                                   | -                               | -                           | P_trifoliata_00027_mRNA_98,1    |
| GF0044005 | 0                            | 0                        | 1                            | Hypothetical protein (1)                                 | transporter activity [GO:0005215 molecular_function] (1); transport [GO:0006810 biological_process] (1); membrane [GO:0016020 cellular_component] (1)                                                                                                                                                                                                                                                                                    | Proton-dependent oligopeptide transporter family [IPRO00109] (1); Major facilitator superfamily domain [IPRO20846] (1)                                                                                                                                                                                                                   | -                               | -                           | P_trifoliata_00027_mRNA_88,1    |
| GF0044004 | 0                            | 0                        | 1                            | Hypothetical protein (1)                                 | transporter activity [GO:0005215 molecular_function] (1); transport [GO:0006810 biological_process] (1); membrane [GO:0016020 cellular_component] (1)                                                                                                                                                                                                                                                                                    | Proton-dependent oligopeptide transporter family [IPRO00109] (1); Major facilitator superfamily domain [IPRO20846] (1)                                                                                                                                                                                                                   | -                               | -                           | P_trifoliata_00027_mRNA_86,1    |
| GF0044003 | 0                            | 0                        | 1                            | Putative peptide transporter protein (1)                 | transporter activity [GO:0005215 molecular_function] (1); transport [GO:0006810 biological_process] (1); membrane [GO:0016020 cellular_component] (1)                                                                                                                                                                                                                                                                                    | Proton-dependent oligopeptide transporter family [IPRO00109] (1); Major facilitator superfamily domain [IPRO20846] (1)                                                                                                                                                                                                                   | -                               | -                           | P_trifoliata_00027_mRNA_85,1    |
| GF0044002 | 0                            | 0                        | 1                            | Peptide transporter PTR3-A (1)                           | transporter activity [GO:0005215 molecular_function] (1); transport [GO:0006810 biological_process] (1); membrane [GO:0016020 cellular_component] (1)                                                                                                                                                                                                                                                                                    | Proton-dependent oligopeptide transporter family [IPRO00109] (1); Major facilitator superfamily domain [IPRO20846] (1)                                                                                                                                                                                                                   | -                               | -                           | P_trifoliata_00027_mRNA_83,1    |
| GF0044001 | 0                            | 0                        | 1                            | Hypothetical protein (1)                                 |                                                                                                                                                                                                                                                                                                                                                                                                                                          |                                                                                                                                                                                                                                                                                                                                          | -                               | -                           | P_trifoliata_00027_mRNA_80,1    |
| GF0044000 | 0                            | 0                        | 1                            | Hypothetical protein (1)                                 |                                                                                                                                                                                                                                                                                                                                                                                                                                          |                                                                                                                                                                                                                                                                                                                                          | -                               | -                           | P_trifoliata_00027_mRNA_79,1    |
| GF0043999 | 0                            | 0                        | 1                            | Hypothetical protein (1)                                 |                                                                                                                                                                                                                                                                                                                                                                                                                                          |                                                                                                                                                                                                                                                                                                                                          | -                               | -                           | P_trifoliata_00027_mRNA_78,1    |
| GF0043998 | 0                            | 0                        | 1                            | Hypothetical protein (1)                                 |                                                                                                                                                                                                                                                                                                                                                                                                                                          |                                                                                                                                                                                                                                                                                                                                          | -                               | -                           | P_trifoliata_00027_mRNA_77,1    |
| GF0043997 | 0                            | 0                        | 1                            | Hypothetical protein (1)                                 |                                                                                                                                                                                                                                                                                                                                                                                                                                          |                                                                                                                                                                                                                                                                                                                                          | -                               | -                           | P_trifoliata_00027_mRNA_76,1    |
| GF0043996 | 0                            | 0                        | 1                            | Hypothetical protein (1)                                 |                                                                                                                                                                                                                                                                                                                                                                                                                                          |                                                                                                                                                                                                                                                                                                                                          | -                               | -                           | P_trifoliata_00027_mRNA_75,1    |
| GF0043995 | 0                            | 0                        | 1                            | Hypothetical protein (1)                                 |                                                                                                                                                                                                                                                                                                                                                                                                                                          |                                                                                                                                                                                                                                                                                                                                          | -                               | -                           | P_trifoliata_00027_mRNA_74,1    |
| GF0043994 | 0                            | 0                        | 1                            | Hypothetical protein (1)                                 |                                                                                                                                                                                                                                                                                                                                                                                                                                          |                                                                                                                                                                                                                                                                                                                                          | -                               | -                           | P_trifoliata_00027_mRNA_7,1     |
| GF0043993 | 0                            | 0                        | 1                            | Hypothetical protein (1)                                 | response to biotic stimulus [GO:0009607 biological_process] (1); defense response [GO:0006952 biological_process] (1); oxidation-reduction process [GO:005514 biological_process] (1); oxidoreductase activity, acting on paired donors, with incorporation or reduction of molecular oxygen [GO:0016705 molecular_function] (1); iron ion binding [GO:0005506 molecular_function] (1); heme binding [GO:0020037 molecular_function] (1) | START-like domain [IPRO22393] (1); Helix v1/Major latex protein [IPRO00916] (1)                                                                                                                                                                                                                                                          | -                               | -                           | P_trifoliata_00027_mRNA_69,1    |
| GF0043992 | 0                            | 0                        | 1                            | Cytochrome P450 71A1 (1)                                 | oxidoreductase activity, acting on paired donors, with incorporation or reduction of molecular oxygen [GO:0016705 molecular_function] (1); iron ion binding [GO:0005506 molecular_function] (1); heme binding [GO:0020037 molecular_function] (1)                                                                                                                                                                                        | Cytochrome P450 [IPRO1128] (1); Cytochrome P450, C-class, group I [IPRO0240] (1); Cytochrome P450, conserved site [IPRO17972] (1)                                                                                                                                                                                                        | -                               | -                           | P_trifoliata_00027_mRNA_67,1    |
| GF0043991 | 0                            | 0                        | 1                            | Hypothetical protein (1)                                 | protein dimerization activity [GO:0046983 molecular_function] (1); nucleic acid binding [GO:0003676 molecular_function] (1)                                                                                                                                                                                                                                                                                                              | Ribonuclease H-like domain [IPRO12337] (1); Helix-turn-helix, base-excision DNA repair, C-terminal [IPRO2170] (1); HAT, C-terminal dimerization domain [IPRO08906] (1)                                                                                                                                                                   | -                               | -                           | P_trifoliata_00027_mRNA_66,1    |
| GF0043990 | 0                            | 0                        | 1                            | Hypothetical protein (1)                                 |                                                                                                                                                                                                                                                                                                                                                                                                                                          |                                                                                                                                                                                                                                                                                                                                          | -                               | -                           | P_trifoliata_00027_mRNA_62,1    |
| GF0043989 | 0                            | 0                        | 1                            | Hypothetical protein (1)                                 | protein dimerization activity [GO:0046983 molecular_function] (1); nucleic acid binding [GO:0003676 molecular_function] (1); DNA binding [GO:0003677 molecular_function] (1)                                                                                                                                                                                                                                                             | Zinc finger, BED-type [IPRO03656] (1); Ribonuclease H-like domain [IPRO12337] (1); HAT, C-terminal dimerization domain [IPRO08906] (1)                                                                                                                                                                                                   | -                               | -                           | P_trifoliata_00027_mRNA_61,1    |
| GF0043988 | 0                            | 0                        | 1                            | TMV resistance N (1)                                     |                                                                                                                                                                                                                                                                                                                                                                                                                                          |                                                                                                                                                                                                                                                                                                                                          | -                               | -                           | P_trifoliata_00027_mRNA_6,1     |
| GF0043987 | 0                            | 0                        | 1                            | Hypothetical protein (1)                                 |                                                                                                                                                                                                                                                                                                                                                                                                                                          |                                                                                                                                                                                                                                                                                                                                          | -                               | -                           | P_trifoliata_00027_mRNA_59,1    |
| GF0043986 | 0                            | 0                        | 1                            | Hypothetical protein (1)                                 |                                                                                                                                                                                                                                                                                                                                                                                                                                          |                                                                                                                                                                                                                                                                                                                                          | -                               | -                           | P_trifoliata_00027_mRNA_56,1    |
| GF0043985 | 0                            | 0                        | 1                            | Hypothetical protein (1)                                 | nucleic acid binding [GO:0003676 molecular_function] (1); zinc ion binding [GO:0008270 molecular_function] (1)                                                                                                                                                                                                                                                                                                                           | Zinc finger, CCHC-type [IPRO01878] (1)                                                                                                                                                                                                                                                                                                   | -                               | -                           | P_trifoliata_00027_mRNA_53,1    |
| GF0043984 | 0                            | 0                        | 1                            | Hypothetical protein (1)                                 |                                                                                                                                                                                                                                                                                                                                                                                                                                          |                                                                                                                                                                                                                                                                                                                                          | -                               | -                           | P_trifoliata_00027_mRNA_52,1    |
| GF0043983 | 0                            | 0                        | 1                            | Hypothetical protein (1)                                 |                                                                                                                                                                                                                                                                                                                                                                                                                                          |                                                                                                                                                                                                                                                                                                                                          | -                               | -                           | P_trifoliata_00027_mRNA_51,1    |
| GF0043982 | 0                            | 0                        | 1                            | Hypothetical protein (1)                                 |                                                                                                                                                                                                                                                                                                                                                                                                                                          |                                                                                                                                                                                                                                                                                                                                          | -                               | -                           | P_trifoliata_00027_mRNA_5,1     |
| GF0043981 | 0                            | 0                        | 1                            | Hypothetical protein (1)                                 | nucleic acid binding [GO:0003676 molecular_function] (1); zinc ion binding [GO:0008270 molecular_function] (1)                                                                                                                                                                                                                                                                                                                           | Zinc finger, CCHC-type [IPRO01878] (1); Zinc knuckle CX2CX4HX4C [IPRO2538] (1)                                                                                                                                                                                                                                                           | -                               | -                           | P_trifoliata_00027_mRNA_48,1    |
| GF0043980 | 0                            | 0                        | 1                            | Hypothetical protein (1)                                 |                                                                                                                                                                                                                                                                                                                                                                                                                                          |                                                                                                                                                                                                                                                                                                                                          | -                               | -                           | P_trifoliata_00027_mRNA_47,1    |
| GF0043979 | 0                            | 0                        | 1                            | Hypothetical protein (1)                                 |                                                                                                                                                                                                                                                                                                                                                                                                                                          |                                                                                                                                                                                                                                                                                                                                          | -                               | -                           | P_trifoliata_00027_mRNA_44,1    |
| GF0043978 | 0                            | 0                        | 1                            | Hypothetical protein (1)                                 |                                                                                                                                                                                                                                                                                                                                                                                                                                          |                                                                                                                                                                                                                                                                                                                                          | -                               | -                           | P_trifoliata_00027_mRNA_42,1    |
| GF0043977 | 0                            | 0                        | 1                            | NBS type disease resistance protein (1)                  | ADP binding [GO:0043531 molecular_function] (1)                                                                                                                                                                                                                                                                                                                                                                                          | P-loop containing nucleoside triphosphate hydrolase [IPRO27417] (1); NB-ARC [IPRO2152] (1); Winged helix-turn-helix DNA-binding domain [IPRO1199] (1); Leucine-rich repeat domain, L domain-like [IPRO32675] (1)                                                                                                                         | -                               | -                           | P_trifoliata_00027_mRNA_4,1     |
| GF0043976 | 0                            | 0                        | 1                            | Hypothetical protein (1)                                 |                                                                                                                                                                                                                                                                                                                                                                                                                                          |                                                                                                                                                                                                                                                                                                                                          | -                               | -                           | P_trifoliata_00027_mRNA_38,1    |
| GF0043975 | 0                            | 0                        | 1                            | Hypothetical protein (1)                                 |                                                                                                                                                                                                                                                                                                                                                                                                                                          |                                                                                                                                                                                                                                                                                                                                          | -                               | -                           | P_trifoliata_00027_mRNA_37,1    |
| GF0043974 | 0                            | 0                        | 1                            | Hypothetical protein (1)                                 | nucleic acid binding [GO:0003676 molecular_function] (1); DNA integration [GO:0015074 biological_process] (1)                                                                                                                                                                                                                                                                                                                            | Integrase, catalytic core [IPRO01584] (1); Ribonuclease H-like domain [IPRO12337] (1)                                                                                                                                                                                                                                                    | -                               | -                           | P_trifoliata_00027_mRNA_35,1    |
| GF0043973 | 0                            | 0                        | 1                            | Hypothetical protein (1)                                 |                                                                                                                                                                                                                                                                                                                                                                                                                                          |                                                                                                                                                                                                                                                                                                                                          | -                               | -                           | P_trifoliata_00027_mRNA_34,1    |
| GF0043972 | 0                            | 0                        | 1                            | Hypothetical protein (1)                                 |                                                                                                                                                                                                                                                                                                                                                                                                                                          |                                                                                                                                                                                                                                                                                                                                          | -                               | -                           | P_trifoliata_00027_mRNA_32,1    |
| GF0043971 | 0                            | 0                        | 1                            | Hypothetical protein (1)                                 |                                                                                                                                                                                                                                                                                                                                                                                                                                          |                                                                                                                                                                                                                                                                                                                                          | -                               | -                           | P_trifoliata_00027_mRNA_30,1    |

| ID        | Num. in <i>C. clementiae</i> | Num. in <i>C. canthii</i> | Num. in <i>F. trifoliata</i> | Note                                                                             | GO                                                                                                                                                                                                                                                                                                                                               | InterPro                                                                                                                                                                                                                    | Members in <i>C. clementiae</i> | Members in <i>C. canthii</i> | Members in <i>F. trifoliata</i> |
|-----------|------------------------------|---------------------------|------------------------------|----------------------------------------------------------------------------------|--------------------------------------------------------------------------------------------------------------------------------------------------------------------------------------------------------------------------------------------------------------------------------------------------------------------------------------------------|-----------------------------------------------------------------------------------------------------------------------------------------------------------------------------------------------------------------------------|---------------------------------|------------------------------|---------------------------------|
| GF0043970 | 0                            | 0                         | 1                            | Peroxidase 4 (1)                                                                 | heme binding [GO:0020037 molecular_function] (1); response to oxidative stress [GO:0006979 biological_process] (1); peroxidase activity [GO:0004601 molecular_function] (1); oxidation-reduction process [GO:005114 biological_process] (1)                                                                                                      | Haem peroxidase, plant/fungal/bacterial [IPRO22016] (1); Peroxidase, active site [IPRO19794] (1); Peroxidase heme-ligand binding site [IPRO19793] (1); Plant peroxidase [IPRO08221] (1); Haem peroxidase [IPRO10255] (1)    | -                               | -                            | P_trifoliata_00027_mRNA_27.1    |
| GF0043969 | 0                            | 0                         | 1                            | Hypothetical protein (1)                                                         |                                                                                                                                                                                                                                                                                                                                                  |                                                                                                                                                                                                                             | -                               | -                            | P_trifoliata_00027_mRNA_26.1    |
| GF0043968 | 0                            | 0                         | 1                            | Hypothetical protein (1)                                                         |                                                                                                                                                                                                                                                                                                                                                  |                                                                                                                                                                                                                             | -                               | -                            | P_trifoliata_00027_mRNA_20.1    |
| GF0043967 | 0                            | 0                         | 1                            | Hypothetical protein (1)                                                         |                                                                                                                                                                                                                                                                                                                                                  |                                                                                                                                                                                                                             | -                               | -                            | P_trifoliata_00027_mRNA_19.1    |
| GF0043966 | 0                            | 0                         | 1                            | Fen1nuclease (PF78) repeat protein (1)                                           |                                                                                                                                                                                                                                                                                                                                                  | Pentatricopeptide repeat [IPRO02885] (1)                                                                                                                                                                                    | -                               | -                            | P_trifoliata_00027_mRNA_14.1    |
| GF0043965 | 0                            | 0                         | 1                            | Hypothetical protein (1)                                                         |                                                                                                                                                                                                                                                                                                                                                  | Reverse transcriptase-zinc-binding domain [IPRO26960] (1)                                                                                                                                                                   | -                               | -                            | P_trifoliata_00027_mRNA_1.1     |
| GF0043964 | 0                            | 0                         | 1                            | Hypothetical protein (1)                                                         | transcription factor activity, sequence-specific DNA binding [GO:0005700 molecular_function] (1); sequence-specific DNA binding [GO:0043565 molecular_function] (1); regulation of transcription, DNA-templated [GO:0006355 biological_process] (1)                                                                                              | Basic-leucine zipper domain [IPRO04827] (1)                                                                                                                                                                                 | -                               | -                            | P_trifoliata_00026_mRNA_94.1    |
| GF0043963 | 0                            | 0                         | 1                            | Salicylic acid carboxyl methyltransferase (1)                                    | methyltransferase activity [GO:0008168 molecular_function] (1)                                                                                                                                                                                                                                                                                   | S-adenosyl-L-methionine-dependent methyltransferase [IPRO29063] (1); SAM dependent carboxyl methyltransferase [IPRO05299] (1)                                                                                               | -                               | -                            | P_trifoliata_00026_mRNA_82.1    |
| GF0043962 | 0                            | 0                         | 1                            | Endoplasmic reticulum retrieval protein 1B isoform 1 (1)                         | integral component of membrane [GO:0016021 cellular_component] (1)                                                                                                                                                                                                                                                                               | Retrieval of early ER protein Ret1 [IPRO04932] (1)                                                                                                                                                                          | -                               | -                            | P_trifoliata_00026_mRNA_72.1    |
| GF0043961 | 0                            | 0                         | 1                            | Hypothetical protein (1)                                                         |                                                                                                                                                                                                                                                                                                                                                  |                                                                                                                                                                                                                             | -                               | -                            | P_trifoliata_00026_mRNA_38.1    |
| GF0043960 | 0                            | 0                         | 1                            | Hypothetical protein (1)                                                         | ATP binding [GO:0005524 molecular_function] (1); microtubule motor activity [GO:0003777 molecular_function] (1); microtubule-based movement [GO:0007018 biological_process] (1); microtubule binding [GO:0008017 molecular_function] (1)                                                                                                         | P-loop containing nucleoside triphosphate hydrolase [IPRO27417] (1); Kinesin-like protein [IPRO25640] (1); Kinesin motor domain, conserved site [IPRO19821] (1); Kinesin motor domain [IPRO01752] (1)                       | -                               | -                            | P_trifoliata_00026_mRNA_138.1   |
| GF0043959 | 0                            | 0                         | 1                            | Hypothetical protein (1)                                                         |                                                                                                                                                                                                                                                                                                                                                  |                                                                                                                                                                                                                             | -                               | -                            | P_trifoliata_00026_mRNA_137.1   |
| GF0043958 | 0                            | 0                         | 1                            | Hypothetical protein (1)                                                         |                                                                                                                                                                                                                                                                                                                                                  |                                                                                                                                                                                                                             | -                               | -                            | P_trifoliata_00026_mRNA_126.1   |
| GF0043957 | 0                            | 0                         | 1                            | Hypothetical protein (1)                                                         |                                                                                                                                                                                                                                                                                                                                                  |                                                                                                                                                                                                                             | -                               | -                            | P_trifoliata_00025_mRNA_98.1    |
| GF0043956 | 0                            | 0                         | 1                            | Hypothetical protein (1)                                                         |                                                                                                                                                                                                                                                                                                                                                  |                                                                                                                                                                                                                             | -                               | -                            | P_trifoliata_00025_mRNA_94.1    |
| GF0043955 | 0                            | 0                         | 1                            | Nucleoside diphosphate kinase (1)                                                | GTP biosynthetic process [GO:0006183 biological_process] (1); UTP biosynthetic process [GO:0006228 biological_process] (1); nucleoside diphosphate phosphorylation [GO:0006165 biological_process] (1); CTP biosynthetic process [GO:0006241 biological_process] (1); nucleoside diphosphate kinase activity [GO:0004550 molecular_function] (1) | Nucleoside diphosphate kinase [IPRO01561] (1)                                                                                                                                                                               | -                               | -                            | P_trifoliata_00025_mRNA_93.1    |
| GF0043954 | 0                            | 0                         | 1                            | Hypothetical protein (1)                                                         |                                                                                                                                                                                                                                                                                                                                                  | Aspartic peptidase domain [IPRO21109] (1)                                                                                                                                                                                   | -                               | -                            | P_trifoliata_00025_mRNA_9.1     |
| GF0043953 | 0                            | 0                         | 1                            | Hypothetical protein (1)                                                         |                                                                                                                                                                                                                                                                                                                                                  |                                                                                                                                                                                                                             | -                               | -                            | P_trifoliata_00025_mRNA_84.1    |
| GF0043952 | 0                            | 0                         | 1                            | Hypothetical protein (1)                                                         |                                                                                                                                                                                                                                                                                                                                                  |                                                                                                                                                                                                                             | -                               | -                            | P_trifoliata_00025_mRNA_83.1    |
| GF0043951 | 0                            | 0                         | 1                            | S-adenosyl-L-methionine: salicylic acid carboxyl methyltransferase, putative (1) | methyltransferase activity [GO:0008168 molecular_function] (1)                                                                                                                                                                                                                                                                                   | SAM dependent carboxyl methyltransferase [IPRO05299] (1); S-adenosyl-L-methionine-dependent methyltransferase [IPRO29063] (1)                                                                                               | -                               | -                            | P_trifoliata_00025_mRNA_81.1    |
| GF0043950 | 0                            | 0                         | 1                            | Hypothetical protein (1)                                                         |                                                                                                                                                                                                                                                                                                                                                  |                                                                                                                                                                                                                             | -                               | -                            | P_trifoliata_00025_mRNA_73.1    |
| GF0043949 | 0                            | 0                         | 1                            | Hypothetical protein (1)                                                         |                                                                                                                                                                                                                                                                                                                                                  |                                                                                                                                                                                                                             | -                               | -                            | P_trifoliata_00025_mRNA_66.1    |
| GF0043948 | 0                            | 0                         | 1                            | Transcriptional adapter ADA2b-like protein (1)                                   | DNA binding [GO:0003677 molecular_function] (1); protein binding [GO:0005515 molecular_function] (1)                                                                                                                                                                                                                                             | Homeodomain-like [IPRO09057] (1); SWIRM domain [IPRO07526] (1)                                                                                                                                                              | -                               | -                            | P_trifoliata_00025_mRNA_63.1    |
| GF0043947 | 0                            | 0                         | 1                            | Hypothetical protein (1)                                                         |                                                                                                                                                                                                                                                                                                                                                  |                                                                                                                                                                                                                             | -                               | -                            | P_trifoliata_00025_mRNA_61      |
| GF0043946 | 0                            | 0                         | 1                            | Receptor like protein 33 (1)                                                     | protein binding [GO:0005515 molecular_function] (1)                                                                                                                                                                                                                                                                                              | Leucine-rich repeat, typical subtype [IPRO03591] (1); Leucine-rich repeat domain, L domain-like [IPRO12675] (1); Leucine-rich repeat [IPRO01611] (1); Leucine-rich repeat-containing N-terminal, plant-type [IPRO13210] (1) | -                               | -                            | P_trifoliata_00025_mRNA_56.1    |
| GF0043945 | 0                            | 0                         | 1                            | Hypothetical protein (1)                                                         |                                                                                                                                                                                                                                                                                                                                                  | Leucine-rich repeat domain, L domain-like [IPRO13210] (1)                                                                                                                                                                   | -                               | -                            | P_trifoliata_00025_mRNA_55.1    |
| GF0043944 | 0                            | 0                         | 1                            | DnaJ14 protein, putative (1)                                                     | nucleotide binding [GO:0000166 molecular_function] (1); metal ion binding [GO:0046072 molecular_function] (1)                                                                                                                                                                                                                                    | DnaJ domain [IPRO01623] (1)                                                                                                                                                                                                 | -                               | -                            | P_trifoliata_00025_mRNA_53.1    |
| GF0043943 | 0                            | 0                         | 1                            | Hypothetical protein (1)                                                         |                                                                                                                                                                                                                                                                                                                                                  | Cation-transporting P-type ATPase, N-terminal [IPRO04014] (1); P-type ATPase, A domain [IPRO08250] (1)                                                                                                                      | -                               | -                            | P_trifoliata_00025_mRNA_50.1    |
| GF0043942 | 0                            | 0                         | 1                            | Hypothetical protein (1)                                                         |                                                                                                                                                                                                                                                                                                                                                  |                                                                                                                                                                                                                             | -                               | -                            | P_trifoliata_00025_mRNA_45.1    |
| GF0043941 | 0                            | 0                         | 1                            | Hypothetical protein (1)                                                         |                                                                                                                                                                                                                                                                                                                                                  |                                                                                                                                                                                                                             | -                               | -                            | P_trifoliata_00025_mRNA_41.1    |
| GF0043940 | 0                            | 0                         | 1                            | Hypothetical protein (1)                                                         | nucleic acid binding [GO:0003676 molecular_function] (1); zinc ion binding [GO:0008270 molecular_function] (1)                                                                                                                                                                                                                                   | Zinc finger, CCHC-type [IPRO01878] (1)                                                                                                                                                                                      | -                               | -                            | P_trifoliata_00025_mRNA_4.1     |
| GF0043939 | 0                            | 0                         | 1                            | Thymidine kinase (1)                                                             | thymidine kinase activity [GO:0004797 molecular_function] (1); ATP binding [GO:0005524 molecular_function] (1)                                                                                                                                                                                                                                   | P-loop containing nucleoside triphosphate hydrolase [IPRO27417] (1); Thymidine kinase, conserved site [IPRO03637] (1); Thymidine kinase [IPRO07967] (1)                                                                     | -                               | -                            | P_trifoliata_00025_mRNA_34.1    |
| GF0043938 | 0                            | 0                         | 1                            | Hypothetical protein (1)                                                         |                                                                                                                                                                                                                                                                                                                                                  | Pectin lyase fold [IPRO12334] (1); Pectin lyase fold/virulence factor [IPRO11050] (1)                                                                                                                                       | -                               | -                            | P_trifoliata_00025_mRNA_24.1    |
| GF0043937 | 0                            | 0                         | 1                            | Hypothetical protein (1)                                                         | carbohydrate metabolic process [GO:0005975 biological_process] (1); polygalacturonase activity [GO:0004650 molecular_function] (1)                                                                                                                                                                                                               | Pectin lyase fold [IPRO12334] (1); Pectin lyase fold/virulence factor [IPRO11050] (1); Glycoside hydrolase, family 28 [IPRO00743] (1)                                                                                       | -                               | -                            | P_trifoliata_00025_mRNA_23.1    |
| GF0043936 | 0                            | 0                         | 1                            | Polygalacturonase (1)                                                            | carbohydrate metabolic process [GO:0005975 biological_process] (1); polygalacturonase activity [GO:0004650 molecular_function] (1)                                                                                                                                                                                                               | Pectin lyase fold [IPRO12334] (1); Pectin lyase fold/virulence factor [IPRO11050] (1); Partial beta-beta repeat [IPRO06626] (1); Glycoside hydrolase, family 28 [IPRO00743] (1)                                             | -                               | -                            | P_trifoliata_00025_mRNA_22.1    |
| GF0043935 | 0                            | 0                         | 1                            | Hypothetical protein (1)                                                         |                                                                                                                                                                                                                                                                                                                                                  |                                                                                                                                                                                                                             | -                               | -                            | P_trifoliata_00025_mRNA_19.1    |
| GF0043934 | 0                            | 0                         | 1                            | Hypothetical protein (1)                                                         |                                                                                                                                                                                                                                                                                                                                                  |                                                                                                                                                                                                                             | -                               | -                            | P_trifoliata_00025_mRNA_18.1    |
| GF0043933 | 0                            | 0                         | 1                            | Hypothetical protein (1)                                                         |                                                                                                                                                                                                                                                                                                                                                  |                                                                                                                                                                                                                             | -                               | -                            | P_trifoliata_00025_mRNA_15.1    |
| GF0043932 | 0                            | 0                         | 1                            | Hypothetical protein (1)                                                         | calcium ion binding [GO:0005509 molecular_function] (1); protein binding [GO:0005515 molecular_function] (1)                                                                                                                                                                                                                                     | EH-hand domain pair [IPRO11992] (1); EH domain [IPRO00261] (1); EF-hand domain [IPRO02048] (1)                                                                                                                              | -                               | -                            | P_trifoliata_00025_mRNA_131.1   |
| GF0043931 | 0                            | 0                         | 1                            | Hypothetical protein (1)                                                         | oxidoreductase activity [GO:0016491 molecular_function] (1); oxidation-reduction process [GO:005114 biological_process] (1); N,N-dimethylamine monooxygenase activity [GO:0004499 molecular_function] (1); NADP binding [GO:0050661 molecular_function] (1)                                                                                      | FAD/NAD(P)-binding domain [IPRO23753] (1); Flavin monooxygenase-like [IPRO20946] (1)                                                                                                                                        | -                               | -                            | P_trifoliata_00025_mRNA_108.1   |
| GF0043930 | 0                            | 0                         | 1                            | Hypothetical protein (1)                                                         |                                                                                                                                                                                                                                                                                                                                                  |                                                                                                                                                                                                                             | -                               | -                            | P_trifoliata_00025_mRNA_101.1   |
| GF0043929 | 0                            | 0                         | 1                            | Putative intracellular protein transport protein USO1-like (1)                   |                                                                                                                                                                                                                                                                                                                                                  | Zein-binding domain [IPRO07656] (1)                                                                                                                                                                                         | -                               | -                            | P_trifoliata_00024_mRNA_97.1    |
| GF0043928 | 0                            | 0                         | 1                            | Photosystem II reaction center W protein, chloroplastic (1)                      | photosystem II [GO:0009523 cellular_component] (1); photosynthesis [GO:0015979 biological_process] (1); chloroplast [GO:0009907 cellular_component] (1)                                                                                                                                                                                          | Photosystem II P680, class 2 [IPRO09806] (1)                                                                                                                                                                                | -                               | -                            | P_trifoliata_00024_mRNA_85.1    |
| GF0043927 | 0                            | 0                         | 1                            | NAC domain-containing protein 67 (1)                                             | regulation of transcription, DNA-templated [GO:0006355 biological_process] (1); DNA binding [GO:0003677 molecular_function] (1)                                                                                                                                                                                                                  | NAC domain [IPRO03441] (1)                                                                                                                                                                                                  | -                               | -                            | P_trifoliata_00024_mRNA_8.1     |
| GF0043926 | 0                            | 0                         | 1                            | Spindle pole body-associated CK1 (1)                                             |                                                                                                                                                                                                                                                                                                                                                  |                                                                                                                                                                                                                             | -                               | -                            | P_trifoliata_00024_mRNA_7.1     |
| GF0043925 | 0                            | 0                         | 1                            | Hypothetical protein (1)                                                         |                                                                                                                                                                                                                                                                                                                                                  |                                                                                                                                                                                                                             | -                               | -                            | P_trifoliata_00024_mRNA_50.1    |
| GF0043924 | 0                            | 0                         | 1                            | Divergent CCT motif protein (1)                                                  |                                                                                                                                                                                                                                                                                                                                                  | Ti5 domain [IPRO10399] (1); CO/CO/TOCI, conserved site [IPRO18467] (1)                                                                                                                                                      | -                               | -                            | P_trifoliata_00024_mRNA_45.1    |
| GF0043923 | 0                            | 0                         | 1                            | Homocysteine S-methyltransferase-like protein (1)                                | ATP binding [GO:0005524 molecular_function] (1); protein kinase activity [GO:0004672 molecular_function] (1); protein phosphorylation [GO:0006468 biological_process] (1)                                                                                                                                                                        | Serine-threonine tyrosine-protein kinase catalytic domain [IPRO01245] (1); Homocysteine-binding domain [IPRO03726] (1); Protein kinase-like domain [IPRO11099] (1); Protein kinase domain [IPRO00616] (1)                   | -                               | -                            | P_trifoliata_00024_mRNA_33.1    |
| GF0043922 | 0                            | 0                         | 1                            | Hypothetical protein (1)                                                         |                                                                                                                                                                                                                                                                                                                                                  |                                                                                                                                                                                                                             | -                               | -                            | P_trifoliata_00024_mRNA_15.1    |
| GF0043921 | 0                            | 0                         | 1                            | Hypothetical protein (1)                                                         |                                                                                                                                                                                                                                                                                                                                                  |                                                                                                                                                                                                                             | -                               | -                            | P_trifoliata_00024_mRNA_142.1   |
| GF0043920 | 0                            | 0                         | 1                            | Caffeic acid 3-O-methyltransferase (1)                                           | methyltransferase activity [GO:0008168 molecular_function] (1); O-methyltransferase activity [GO:0008171 molecular_function] (1)                                                                                                                                                                                                                 | O-methyltransferase, family 2 [IPRO01077] (1); O-methyltransferase COMT-type [IPRO10461] (1); S-adenosyl-L-methionine-dependent methyltransferase [IPRO29063] (1)                                                           | -                               | -                            | P_trifoliata_00024_mRNA_140.1   |
| GF0043919 | 0                            | 0                         | 1                            | Hypothetical protein (1)                                                         |                                                                                                                                                                                                                                                                                                                                                  |                                                                                                                                                                                                                             | -                               | -                            | P_trifoliata_00024_mRNA_139.1   |
| GF0043918 | 0                            | 0                         | 1                            | Hypothetical protein (1)                                                         | nucleic acid binding [GO:0003676 molecular_function] (1)                                                                                                                                                                                                                                                                                         | Ribonuclease H-like domain [IPRO12337] (1)                                                                                                                                                                                  | -                               | -                            | P_trifoliata_00024_mRNA_138.1   |
| GF0043917 | 0                            | 0                         | 1                            | Hypothetical protein (1)                                                         |                                                                                                                                                                                                                                                                                                                                                  |                                                                                                                                                                                                                             | -                               | -                            | P_trifoliata_00024_mRNA_135.1   |
| GF0043916 | 0                            | 0                         | 1                            | Hypothetical protein (1)                                                         |                                                                                                                                                                                                                                                                                                                                                  |                                                                                                                                                                                                                             | -                               | -                            | P_trifoliata_00024_mRNA_134.1   |

| ID        | Num. in <i>C. clementiae</i> | Num. in <i>C. canihii</i> | Num. in <i>P. trifoliata</i> | Note                                                | GO                                                                                                                                                                                                                                                                                       | InterPro                                                                                                                                                                                                                                                                                                                                                 | Members in <i>C. clementiae</i> | Members in <i>C. canihii</i> | Members in <i>P. trifoliata</i> |
|-----------|------------------------------|---------------------------|------------------------------|-----------------------------------------------------|------------------------------------------------------------------------------------------------------------------------------------------------------------------------------------------------------------------------------------------------------------------------------------------|----------------------------------------------------------------------------------------------------------------------------------------------------------------------------------------------------------------------------------------------------------------------------------------------------------------------------------------------------------|---------------------------------|------------------------------|---------------------------------|
| GF0043915 | 0                            | 0                         | 1                            | Hypothetical protein (1)                            | cysteine-type endopeptidase inhibitor activity [GO:0004869 molecular_function] (1)                                                                                                                                                                                                       | Proteinase inhibitor I25, cystatin, conserved region [IPR020381] (1); Cystatin [IPR027214] (1); Proteinase inhibitor I25, cystatin, conserved site [IPR018073] (1)                                                                                                                                                                                       | -                               | -                            | P_trifoliata_00024_mRNA_133.1   |
| GF0043914 | 0                            | 0                         | 1                            | Cysteine proteinase inhibitor (1)                   | cysteine-type endopeptidase inhibitor activity [GO:0004869 molecular_function] (1)                                                                                                                                                                                                       | Proteinase inhibitor I25, cystatin, conserved region [IPR020381] (1); Cystatin [IPR027214] (1); Proteinase inhibitor I25, cystatin, conserved site [IPR018073] (1); Cystatin domain [IPR000101] (1)                                                                                                                                                      | -                               | -                            | P_trifoliata_00024_mRNA_132.1   |
| GF0043913 | 0                            | 0                         | 1                            | Hypothetical protein (1)                            |                                                                                                                                                                                                                                                                                          | Tetratricopeptide repeat [IPR019734] (1); Tetratricopeptide repeat-containing domain [IPR013026] (1); Tetratricopeptide-like helical domain [IPR011990] (1)                                                                                                                                                                                              | -                               | -                            | P_trifoliata_00024_mRNA_131.1   |
| GF0043912 | 0                            | 0                         | 1                            | Hypothetical protein (1)                            | protein binding [GO:0005515 molecular_function] (1)                                                                                                                                                                                                                                      |                                                                                                                                                                                                                                                                                                                                                          | -                               | -                            | P_trifoliata_00024_mRNA_130.1   |
| GF0043911 | 0                            | 0                         | 1                            | Hypothetical protein (1)                            |                                                                                                                                                                                                                                                                                          |                                                                                                                                                                                                                                                                                                                                                          | -                               | -                            | P_trifoliata_00024_mRNA_129.1   |
| GF0043910 | 0                            | 0                         | 1                            | Transcriptional regulator SUPERMAN (1)              | metal ion binding [GO:0046872 molecular_function] (1)                                                                                                                                                                                                                                    | Zinc finger, C2H2 [IPR07087] (1)                                                                                                                                                                                                                                                                                                                         | -                               | -                            | P_trifoliata_00024_mRNA_114.1   |
| GF0043909 | 0                            | 0                         | 1                            | Hypothetical protein (1)                            |                                                                                                                                                                                                                                                                                          |                                                                                                                                                                                                                                                                                                                                                          | -                               | -                            | P_trifoliata_00024_mRNA_108.1   |
| GF0043908 | 0                            | 0                         | 1                            | Hypothetical protein (1)                            |                                                                                                                                                                                                                                                                                          |                                                                                                                                                                                                                                                                                                                                                          | -                               | -                            | P_trifoliata_00024_mRNA_107.1   |
| GF0043907 | 0                            | 0                         | 1                            | Hypothetical protein (1)                            |                                                                                                                                                                                                                                                                                          |                                                                                                                                                                                                                                                                                                                                                          | -                               | -                            | P_trifoliata_00024_mRNA_106.1   |
| GF0043906 | 0                            | 0                         | 1                            | Hypothetical protein (1)                            |                                                                                                                                                                                                                                                                                          |                                                                                                                                                                                                                                                                                                                                                          | -                               | -                            | P_trifoliata_00024_mRNA_105.1   |
| GF0043905 | 0                            | 0                         | 1                            | Hypothetical protein (1)                            |                                                                                                                                                                                                                                                                                          |                                                                                                                                                                                                                                                                                                                                                          | -                               | -                            | P_trifoliata_00024_mRNA_104.1   |
| GF0043904 | 0                            | 0                         | 1                            | Hypothetical protein (1)                            |                                                                                                                                                                                                                                                                                          |                                                                                                                                                                                                                                                                                                                                                          | -                               | -                            | P_trifoliata_00024_mRNA_100.1   |
| GF0043903 | 0                            | 0                         | 1                            | FAR1 DNA-binding domain protein (1)                 | regulation of transcription, DNA-templated [GO:0006355 biological_process] (1)                                                                                                                                                                                                           | FAR1 DNA binding domain [IPR004330] (1); FHY3/FAR1 family [IPR031052] (1)                                                                                                                                                                                                                                                                                | -                               | -                            | P_trifoliata_00023_mRNA_99.1    |
| GF0043902 | 0                            | 0                         | 1                            | Hypothetical protein (1)                            |                                                                                                                                                                                                                                                                                          |                                                                                                                                                                                                                                                                                                                                                          | -                               | -                            | P_trifoliata_00023_mRNA_92.1    |
| GF0043901 | 0                            | 0                         | 1                            | Embryo defective 2752 protein (1)                   |                                                                                                                                                                                                                                                                                          | Domain unknown function DUF295 [IPR005174] (1); Myb/SANT-like domain [IPR024752] (1)                                                                                                                                                                                                                                                                     | -                               | -                            | P_trifoliata_00023_mRNA_83      |
| GF0043900 | 0                            | 0                         | 1                            | Hypothetical protein (1)                            |                                                                                                                                                                                                                                                                                          |                                                                                                                                                                                                                                                                                                                                                          | -                               | -                            | P_trifoliata_00023_mRNA_75.1    |
| GF0043899 | 0                            | 0                         | 1                            | Hypothetical protein (1)                            |                                                                                                                                                                                                                                                                                          |                                                                                                                                                                                                                                                                                                                                                          | -                               | -                            | P_trifoliata_00023_mRNA_65.1    |
| GF0043898 | 0                            | 0                         | 1                            | Hypothetical protein (1)                            |                                                                                                                                                                                                                                                                                          |                                                                                                                                                                                                                                                                                                                                                          | -                               | -                            | P_trifoliata_00023_mRNA_57.1    |
| GF0043897 | 0                            | 0                         | 1                            | Hypothetical protein (1)                            |                                                                                                                                                                                                                                                                                          |                                                                                                                                                                                                                                                                                                                                                          | -                               | -                            | P_trifoliata_00023_mRNA_51.1    |
| GF0043896 | 0                            | 0                         | 1                            | Hypothetical protein (1)                            | chromatin binding [GO:0003682 molecular_function] (1)                                                                                                                                                                                                                                    | Bromo adjacent homology (BAH) domain [IPR01025] (1); WLM domain [IPR013536] (1)                                                                                                                                                                                                                                                                          | -                               | -                            | P_trifoliata_00023_mRNA_50.1    |
| GF0043895 | 0                            | 0                         | 1                            | Hypothetical protein (1)                            |                                                                                                                                                                                                                                                                                          |                                                                                                                                                                                                                                                                                                                                                          | -                               | -                            | P_trifoliata_00023_mRNA_46.1    |
| GF0043894 | 0                            | 0                         | 1                            | Hypothetical protein (1)                            |                                                                                                                                                                                                                                                                                          |                                                                                                                                                                                                                                                                                                                                                          | -                               | -                            | P_trifoliata_00023_mRNA_45.1    |
| GF0043893 | 0                            | 0                         | 1                            | Tetraspanin family protein (1)                      | integral component of membrane [GO:0016021 cellular_component] (1)                                                                                                                                                                                                                       | Tetraspanin [IPR003011] (1); Tetraspanin/Perlecan [IPR018499] (1)                                                                                                                                                                                                                                                                                        | -                               | -                            | P_trifoliata_00023_mRNA_4.1     |
| GF0043892 | 0                            | 0                         | 1                            | Isoprenoid synthase, chloroplasmic (1)              | lyase activity [GO:0016829 molecular_function] (1); terpene synthase activity [GO:0010333 molecular_function] (1); magnesium ion binding [GO:0000287 molecular_function] (1); metabolic process [GO:0008152 biological_process] (1)                                                      | Isoprenoid synthase domain [IPR008949] (1); Terpenoid cyclases/protein prenyltransferase alpha-alpha toroid [IPR008939] (1); Terpene synthase, N-terminal domain [IPR00906] (1); Terpene synthase, metal-binding domain [IPR005630] (1)                                                                                                                  | -                               | -                            | P_trifoliata_00023_mRNA_38.1    |
| GF0043891 | 0                            | 0                         | 1                            | Probable sesquiterpene synthase (1)                 | metabolic process [GO:0008152 biological_process] (1); magnesium ion binding [GO:0000287 molecular_function] (1); terpene synthase activity [GO:0010333 molecular_function] (1); lyase activity [GO:0016829 molecular_function] (1)                                                      | Terpene synthase, N-terminal domain [IPR01908] (1); Terpene synthase, metal-binding domain [IPR005630] (1); Terpenoid cyclases/protein prenyltransferase alpha-alpha toroid [IPR008939] (1); Isoprenoid synthase domain [IPR008949] (1)                                                                                                                  | -                               | -                            | P_trifoliata_00023_mRNA_37.1    |
| GF0043890 | 0                            | 0                         | 1                            | Hypothetical protein (1)                            |                                                                                                                                                                                                                                                                                          | Domain of unknown function DUF4283 [IPR025558] (1)                                                                                                                                                                                                                                                                                                       | -                               | -                            | P_trifoliata_00023_mRNA_33.1    |
| GF0043889 | 0                            | 0                         | 1                            | Hypothetical protein (1)                            |                                                                                                                                                                                                                                                                                          | Aspartic peptidase domain [IPR021109] (1); Pentatricopeptide repeat [IPR02885] (1); Retroviral aspartyl protease [IPR013262] (1); Endonuclease/exonuclease/phosphatase [IPR005135] (1)                                                                                                                                                                   | -                               | -                            | P_trifoliata_00023_mRNA_31.1    |
| GF0043888 | 0                            | 0                         | 1                            | Hypothetical protein (1)                            |                                                                                                                                                                                                                                                                                          |                                                                                                                                                                                                                                                                                                                                                          | -                               | -                            | P_trifoliata_00023_mRNA_28.1    |
| GF0043887 | 0                            | 0                         | 1                            | Hypothetical protein (1)                            |                                                                                                                                                                                                                                                                                          |                                                                                                                                                                                                                                                                                                                                                          | -                               | -                            | P_trifoliata_00023_mRNA_24.1    |
| GF0043886 | 0                            | 0                         | 1                            | Hypothetical protein (1)                            |                                                                                                                                                                                                                                                                                          |                                                                                                                                                                                                                                                                                                                                                          | -                               | -                            | P_trifoliata_00023_mRNA_18.1    |
| GF0043885 | 0                            | 0                         | 1                            | Hypothetical protein (1)                            | RNA-DNA hybrid ribonuclease activity [GO:0004523 molecular_function] (1); nucleic acid binding [GO:0003676 molecular_function] (1)                                                                                                                                                       | Ribonuclease H-like domain [IPR012377] (1); Ribonuclease H domain [IPR002156] (1)                                                                                                                                                                                                                                                                        | -                               | -                            | P_trifoliata_00023_mRNA_17.1    |
| GF0043884 | 0                            | 0                         | 1                            | Hypothetical protein (1)                            |                                                                                                                                                                                                                                                                                          | Harbinger transposase-derived nuclease domain [IPR027806] (1)                                                                                                                                                                                                                                                                                            | -                               | -                            | P_trifoliata_00023_mRNA_14.1    |
| GF0043883 | 0                            | 0                         | 1                            | Hypothetical protein (1)                            |                                                                                                                                                                                                                                                                                          |                                                                                                                                                                                                                                                                                                                                                          | -                               | -                            | P_trifoliata_00023_mRNA_126.1   |
| GF0043882 | 0                            | 0                         | 1                            | Hypothetical protein (1)                            |                                                                                                                                                                                                                                                                                          | Protein kinase-like domain [IPR011009] (1); Leucine-rich repeat domain, L domain-like [IPR032675] (1)                                                                                                                                                                                                                                                    | -                               | -                            | P_trifoliata_00023_mRNA_124.1   |
| GF0043881 | 0                            | 0                         | 1                            | Hypothetical protein (1)                            |                                                                                                                                                                                                                                                                                          |                                                                                                                                                                                                                                                                                                                                                          | -                               | -                            | P_trifoliata_00023_mRNA_123.1   |
| GF0043880 | 0                            | 0                         | 1                            | Hypothetical protein (1)                            | nucleic acid binding [GO:0003676 molecular_function] (1)                                                                                                                                                                                                                                 | Reverse transcriptase zinc-binding domain [IPR029060] (1); Ribonuclease H-like domain [IPR012377] (1)                                                                                                                                                                                                                                                    | -                               | -                            | P_trifoliata_00023_mRNA_121.1   |
| GF0043879 | 0                            | 0                         | 1                            | Hypothetical protein (1)                            |                                                                                                                                                                                                                                                                                          |                                                                                                                                                                                                                                                                                                                                                          | -                               | -                            | P_trifoliata_00023_mRNA_121     |
| GF0043878 | 0                            | 0                         | 1                            | Hypothetical protein (1)                            |                                                                                                                                                                                                                                                                                          |                                                                                                                                                                                                                                                                                                                                                          | -                               | -                            | P_trifoliata_00023_mRNA_109.1   |
| GF0043877 | 0                            | 0                         | 1                            | Hypothetical protein (1)                            |                                                                                                                                                                                                                                                                                          |                                                                                                                                                                                                                                                                                                                                                          | -                               | -                            | P_trifoliata_00023_mRNA_108.1   |
| GF0043876 | 0                            | 0                         | 1                            | Hypothetical protein (1)                            |                                                                                                                                                                                                                                                                                          | Reverse transcriptase, RNA-dependent DNA polymerase [IPR013103] (1)                                                                                                                                                                                                                                                                                      | -                               | -                            | P_trifoliata_00023_mRNA_107.1   |
| GF0043875 | 0                            | 0                         | 1                            | Hypothetical protein (1)                            |                                                                                                                                                                                                                                                                                          | Gag-polyprotein of LTR copia-type [IPR029472] (1)                                                                                                                                                                                                                                                                                                        | -                               | -                            | P_trifoliata_00023_mRNA_106.1   |
| GF0043874 | 0                            | 0                         | 1                            | Hypothetical protein (1)                            | protein phosphorylation [GO:0006468 biological_process] (1); protein kinase activity [GO:0004672 molecular_function] (1); ATP binding [GO:0005524 molecular_function] (1)                                                                                                                | Protein kinase domain [IPR000719] (1); Protein kinase-like domain [IPR011009] (1); Serine-threonine/tyrosine-protein kinase catalytic domain [IPR001245] (1)                                                                                                                                                                                             | -                               | -                            | P_trifoliata_00023_mRNA_105.1   |
| GF0043873 | 0                            | 0                         | 1                            | Hypothetical protein (1)                            |                                                                                                                                                                                                                                                                                          |                                                                                                                                                                                                                                                                                                                                                          | -                               | -                            | P_trifoliata_00023_mRNA_103.1   |
| GF0043872 | 0                            | 0                         | 1                            | Hypothetical protein (1)                            |                                                                                                                                                                                                                                                                                          |                                                                                                                                                                                                                                                                                                                                                          | -                               | -                            | P_trifoliata_00023_mRNA_101.1   |
| GF0043871 | 0                            | 0                         | 1                            | Hypothetical protein (1)                            | metastatic process [GO:0006912 biological_process] (1); hydrolase activity [GO:0016787 molecular_function] (1)                                                                                                                                                                           | Alpha/Beta hydrolase fold [IPR029058] (1); Alpha/beta hydrolase fold-3 [IPR013094] (1)                                                                                                                                                                                                                                                                   | -                               | -                            | P_trifoliata_00022_mRNA_92.1    |
| GF0043870 | 0                            | 0                         | 1                            | Hypothetical protein (1)                            |                                                                                                                                                                                                                                                                                          |                                                                                                                                                                                                                                                                                                                                                          | -                               | -                            | P_trifoliata_00022_mRNA_91.1    |
| GF0043869 | 0                            | 0                         | 1                            | Hypothetical protein (1)                            |                                                                                                                                                                                                                                                                                          | SGNH hydrolase-type esterase domain [IPR013830] (1)                                                                                                                                                                                                                                                                                                      | -                               | -                            | P_trifoliata_00022_mRNA_76.1    |
| GF0043868 | 0                            | 0                         | 1                            | Hypothetical protein (1)                            |                                                                                                                                                                                                                                                                                          |                                                                                                                                                                                                                                                                                                                                                          | -                               | -                            | P_trifoliata_00022_mRNA_6.1     |
| GF0043867 | 0                            | 0                         | 1                            | Hypothetical protein (1)                            | zinc ion binding [GO:0000270 molecular_function] (1); nucleic acid binding [GO:0003676 molecular_function] (1)                                                                                                                                                                           | Zinc finger, CCHC-type [IPR001878] (1)                                                                                                                                                                                                                                                                                                                   | -                               | -                            | P_trifoliata_00022_mRNA_5.1     |
| GF0043866 | 0                            | 0                         | 1                            | Hypothetical protein (1)                            | phosphogluconate dehydrogenase (decarboxylating) activity [GO:0004616 molecular_function] (1); pentose-phosphate shunt [GO:0006098 biological_process] (1); oxidoreductase activity [GO:0016491 molecular_function] (1); oxidation-reduction process [GO:0055114 biological_process] (1) | 6-phosphogluconate dehydrogenase [IPR00185] (1); NAD(P)+binding domain [IPR016040] (1); 6-phosphogluconate dehydrogenase, C-terminal [IPR00114] (1); 6-phosphogluconate dehydrogenase, domain 2 [IPR013228] (1); 6-phosphogluconate dehydrogenase, NADP-binding [IPR006115] (1); 6-phosphogluconate dehydrogenase C-terminal domain-like [IPR008927] (1) | -                               | -                            | P_trifoliata_00022_mRNA_49.1    |
| GF0043865 | 0                            | 0                         | 1                            | Hypothetical protein (1)                            |                                                                                                                                                                                                                                                                                          | Major facilitator superfamily domain [IPR020846] (1)                                                                                                                                                                                                                                                                                                     | -                               | -                            | P_trifoliata_00022_mRNA_44.1    |
| GF0043864 | 0                            | 0                         | 1                            | Germination family protein (1)                      |                                                                                                                                                                                                                                                                                          | NADH-ubiquinone reductase complex 1 MLKQ subunit [IPR010530] (1)                                                                                                                                                                                                                                                                                         | -                               | -                            | P_trifoliata_00022_mRNA_22.1    |
| GF0043863 | 0                            | 0                         | 1                            | PLC-like phosphodiesterases superfamily protein (1) | lipid metabolic process [GO:0006629 biological_process] (1); phosphoric diester hydrolase activity [GO:0008081 molecular_function] (1)                                                                                                                                                   | PLC-like phosphodiesterase, TM beta/alpha-barrel domain [IPR01946] (1); Phosphatidylinositol-specific phospholipase C, X domain [IPR000909] (1)                                                                                                                                                                                                          | -                               | -                            | P_trifoliata_00022_mRNA_21.1    |
| GF0043862 | 0                            | 0                         | 1                            | Hypothetical protein (1)                            | protein phosphorylation [GO:0006468 biological_process] (1); protein kinase activity [GO:0004672 molecular_function] (1)                                                                                                                                                                 | Serine-threonine/tyrosine-protein kinase catalytic domain [IPR001245] (1); Protein kinase-like domain [IPR011009] (1)                                                                                                                                                                                                                                    | -                               | -                            | P_trifoliata_00022_mRNA_20.1    |
| GF0043861 | 0                            | 0                         | 1                            | Hypothetical protein (1)                            |                                                                                                                                                                                                                                                                                          | Reverse transcriptase, RNA-dependent DNA polymerase [IPR013103] (1)                                                                                                                                                                                                                                                                                      | -                               | -                            | P_trifoliata_00022_mRNA_2.1     |
| GF0043860 | 0                            | 0                         | 1                            | Hypothetical protein (1)                            |                                                                                                                                                                                                                                                                                          |                                                                                                                                                                                                                                                                                                                                                          | -                               | -                            | P_trifoliata_00022_mRNA_148.1   |
| GF0043859 | 0                            | 0                         | 1                            | Hypothetical protein (1)                            |                                                                                                                                                                                                                                                                                          |                                                                                                                                                                                                                                                                                                                                                          | -                               | -                            | P_trifoliata_00022_mRNA_147.1   |
| GF0043858 | 0                            | 0                         | 1                            | Hypothetical protein (1)                            |                                                                                                                                                                                                                                                                                          |                                                                                                                                                                                                                                                                                                                                                          | -                               | -                            | P_trifoliata_00022_mRNA_146.1   |
| GF0043857 | 0                            | 0                         | 1                            | Hypothetical protein (1)                            |                                                                                                                                                                                                                                                                                          |                                                                                                                                                                                                                                                                                                                                                          | -                               | -                            | P_trifoliata_00022_mRNA_145.1   |
| GF0043856 | 0                            | 0                         | 1                            | Hypothetical protein (1)                            |                                                                                                                                                                                                                                                                                          |                                                                                                                                                                                                                                                                                                                                                          | -                               | -                            | P_trifoliata_00022_mRNA_143.1   |
| GF0043855 | 0                            | 0                         | 1                            | Hypothetical protein (1)                            |                                                                                                                                                                                                                                                                                          |                                                                                                                                                                                                                                                                                                                                                          | -                               | -                            | P_trifoliata_00022_mRNA_142.1   |
| GF0043854 | 0                            | 0                         | 1                            | Hypothetical protein (1)                            |                                                                                                                                                                                                                                                                                          |                                                                                                                                                                                                                                                                                                                                                          | -                               | -                            | P_trifoliata_00022_mRNA_141.1   |
| GF0043853 | 0                            | 0                         | 1                            | Hypothetical protein (1)                            |                                                                                                                                                                                                                                                                                          |                                                                                                                                                                                                                                                                                                                                                          | -                               | -                            | P_trifoliata_00022_mRNA_140.1   |
| GF0043852 | 0                            | 0                         | 1                            | Hypothetical protein (1)                            |                                                                                                                                                                                                                                                                                          |                                                                                                                                                                                                                                                                                                                                                          | -                               | -                            | P_trifoliata_00022_mRNA_139.1   |
| GF0043851 | 0                            | 0                         | 1                            | Hypothetical protein (1)                            |                                                                                                                                                                                                                                                                                          |                                                                                                                                                                                                                                                                                                                                                          | -                               | -                            | P_trifoliata_00022_mRNA_137.1   |

| ID        | Num. in <i>C. caryocarpus</i> | Num. in <i>C. canthii</i> | Num. in <i>P. trifoliata</i> | Note                                                          | GO                                                                                                                                                                                                                                                                                                                                                                                                                                                            | InterPro                                                                                                                                                                                                                                                                                                                                                       | Members in <i>C. caryocarpus</i> | Members in <i>C. canthii</i> | Members in <i>P. trifoliata</i> |
|-----------|-------------------------------|---------------------------|------------------------------|---------------------------------------------------------------|---------------------------------------------------------------------------------------------------------------------------------------------------------------------------------------------------------------------------------------------------------------------------------------------------------------------------------------------------------------------------------------------------------------------------------------------------------------|----------------------------------------------------------------------------------------------------------------------------------------------------------------------------------------------------------------------------------------------------------------------------------------------------------------------------------------------------------------|----------------------------------|------------------------------|---------------------------------|
| GF0043850 | 0                             | 0                         | 0                            | 1 Mucronate cyclisomerase, putative (1)                       | metabolic process [GO:0008152] biological_process (1); catalytic activity [GO:0003824 molecular_function] (1)                                                                                                                                                                                                                                                                                                                                                 | Mandelate racemase/mucronate lactonizing enzyme, N-terminal domain [IPR013341] (1); Mandelate racemase/mucronate lactonizing enzyme/methylaspartate ammonia-lyase [IPR013541] (1); Mandelate racemase/mucronate lactonizing enzyme, C-terminal [IPR013342] (1); Enolase N-terminal domain-like [IPR029071] (1); Enolase C-terminal domain-like [IPR029065] (1) | -                                | -                            | P_trifoliata_00022_mRNA_134.1   |
| GF0043849 | 0                             | 0                         | 0                            | 1 Lipid transfer protein (1)                                  |                                                                                                                                                                                                                                                                                                                                                                                                                                                               | Bifunctional inhibitor/plant lipid transfer protein/seed storage helical domain [IPR016140] (1)                                                                                                                                                                                                                                                                | -                                | -                            | P_trifoliata_00022_mRNA_133.1   |
| GF0043848 | 0                             | 0                         | 0                            | 1 Lipid transfer protein (1)                                  |                                                                                                                                                                                                                                                                                                                                                                                                                                                               | Bifunctional inhibitor/plant lipid transfer protein/seed storage helical domain [IPR016140] (1)                                                                                                                                                                                                                                                                | -                                | -                            | P_trifoliata_00022_mRNA_132.1   |
| GF0043847 | 0                             | 0                         | 0                            | 1 Alpha/beta hydrolase family protein (1)                     | structural constituent of ribosome [GO:0003735 molecular_function] (1); intracellular [GO:0005822 cellular_component] (1); translation [GO:0006412 biological_process] (1); ribosome [GO:0005840 cellular_component] (1)                                                                                                                                                                                                                                      | Ribosomal protein S7e [IPR000554] (1); Alpha/Beta hydrolase fold [IPR029058] (1); Alpha/beta hydrolase fold-1 [IPR000073] (1)                                                                                                                                                                                                                                  | -                                | -                            | P_trifoliata_00022_mRNA_108.1   |
| GF0043846 | 0                             | 0                         | 0                            | 1 F-box/RN1-like superfamily protein isoform 2 (1)            | protein binding [GO:000515 molecular_function] (1)                                                                                                                                                                                                                                                                                                                                                                                                            | Leucine-rich repeat domain, L domain-like [IPR032675] (1); F-box domain [IPR001810] (1)                                                                                                                                                                                                                                                                        | -                                | -                            | P_trifoliata_00021_mRNA_87.1    |
| GF0043845 | 0                             | 0                         | 0                            | 1 Hypothetical protein (1)                                    |                                                                                                                                                                                                                                                                                                                                                                                                                                                               |                                                                                                                                                                                                                                                                                                                                                                | -                                | -                            | P_trifoliata_00021_mRNA_83.1    |
| GF0043844 | 0                             | 0                         | 0                            | 1 Hypothetical protein (1)                                    |                                                                                                                                                                                                                                                                                                                                                                                                                                                               |                                                                                                                                                                                                                                                                                                                                                                | -                                | -                            | P_trifoliata_00021_mRNA_8.1     |
| GF0043843 | 0                             | 0                         | 0                            | 1 Hydroxyphenylpyruvate reductase (1)                         | metabolic process [GO:0008152 biological_process] (1); oxidoreductase activity, acting on the CH-OH group of donors, NAD or NADP as acceptor [GO:0016616 molecular_function] (1); NAD binding [GO:0051287 molecular_function] (1); oxidation-reduction process [GO:0005114 biological_process] (1)                                                                                                                                                            | D-isomer specific 2-hydroxyacid dehydrogenase, catalytic domain [IPR006139] (1); NAD(P) binding domain [IPR010400] (1); D-isomer specific 2-hydroxyacid dehydrogenase, NAD-binding domain [IPR006140] (1)                                                                                                                                                      | -                                | -                            | P_trifoliata_00021_mRNA_75.1    |
| GF0043842 | 0                             | 0                         | 0                            | 1 Hypothetical protein (1)                                    |                                                                                                                                                                                                                                                                                                                                                                                                                                                               |                                                                                                                                                                                                                                                                                                                                                                | -                                | -                            | P_trifoliata_00021_mRNA_68.1    |
| GF0043841 | 0                             | 0                         | 0                            | 1 Hypothetical protein (1)                                    |                                                                                                                                                                                                                                                                                                                                                                                                                                                               |                                                                                                                                                                                                                                                                                                                                                                | -                                | -                            | P_trifoliata_00021_mRNA_6.1     |
| GF0043840 | 0                             | 0                         | 0                            | 1 Hypothetical protein (1)                                    |                                                                                                                                                                                                                                                                                                                                                                                                                                                               | Leucine-rich repeat domain, L domain-like [IPR032675] (1)                                                                                                                                                                                                                                                                                                      | -                                | -                            | P_trifoliata_00021_mRNA_55.1    |
| GF0043839 | 0                             | 0                         | 0                            | 1 Hypothetical protein (1)                                    |                                                                                                                                                                                                                                                                                                                                                                                                                                                               |                                                                                                                                                                                                                                                                                                                                                                | -                                | -                            | P_trifoliata_00021_mRNA_53.1    |
| GF0043838 | 0                             | 0                         | 0                            | 1 Secreted glycoprotein 3 (1)                                 |                                                                                                                                                                                                                                                                                                                                                                                                                                                               | Bulb-type lectin domain [IPR001480] (1)                                                                                                                                                                                                                                                                                                                        | -                                | -                            | P_trifoliata_00021_mRNA_47.1    |
| GF0043837 | 0                             | 0                         | 0                            | 1 Hypothetical protein (1)                                    |                                                                                                                                                                                                                                                                                                                                                                                                                                                               |                                                                                                                                                                                                                                                                                                                                                                | -                                | -                            | P_trifoliata_00021_mRNA_41.1    |
| GF0043836 | 0                             | 0                         | 0                            | 1 Hypothetical protein (1)                                    |                                                                                                                                                                                                                                                                                                                                                                                                                                                               |                                                                                                                                                                                                                                                                                                                                                                | -                                | -                            | P_trifoliata_00021_mRNA_33.1    |
| GF0043835 | 0                             | 0                         | 0                            | 1 Hypothetical protein (1)                                    |                                                                                                                                                                                                                                                                                                                                                                                                                                                               |                                                                                                                                                                                                                                                                                                                                                                | -                                | -                            | P_trifoliata_00021_mRNA_3.1     |
| GF0043834 | 0                             | 0                         | 0                            | 1 Hypothetical protein (1)                                    |                                                                                                                                                                                                                                                                                                                                                                                                                                                               |                                                                                                                                                                                                                                                                                                                                                                | -                                | -                            | P_trifoliata_00021_mRNA_18.1    |
| GF0043833 | 0                             | 0                         | 0                            | 1 Hypothetical protein (1)                                    | zinc ion binding [GO:0008270 molecular_function] (1)                                                                                                                                                                                                                                                                                                                                                                                                          | Transposase, MuDR, plant [IPR004332] (1); MULE transposase domain [IPR018289] (1); Zinc finger, PMZ-type [IPR006564] (1); Zinc finger, SWIM-type [IPR007527] (1)                                                                                                                                                                                               | -                                | -                            | P_trifoliata_00021_mRNA_16.1    |
| GF0043832 | 0                             | 0                         | 0                            | 1 Hypothetical protein (1)                                    |                                                                                                                                                                                                                                                                                                                                                                                                                                                               |                                                                                                                                                                                                                                                                                                                                                                | -                                | -                            | P_trifoliata_00021_mRNA_144.1   |
| GF0043831 | 0                             | 0                         | 0                            | 1 Fe-S cluster assembly protein SufD (1)                      | iron-sulfur cluster assembly [GO:0016226 biological_process] (1)                                                                                                                                                                                                                                                                                                                                                                                              | SUF system Fe-S cluster assembly, SufBD [IPR000825] (1); SUF system Fe-S cluster assembly, SufD [IPR011542] (1)                                                                                                                                                                                                                                                | -                                | -                            | P_trifoliata_00021_mRNA_143.1   |
| GF0043830 | 0                             | 0                         | 0                            | 1 Hypothetical protein (1)                                    |                                                                                                                                                                                                                                                                                                                                                                                                                                                               | Harburger transposase-derived nuclease domain [IPR027806] (1)                                                                                                                                                                                                                                                                                                  | -                                | -                            | P_trifoliata_00021_mRNA_136.1   |
| GF0043829 | 0                             | 0                         | 0                            | 1 Hypothetical protein (1)                                    |                                                                                                                                                                                                                                                                                                                                                                                                                                                               |                                                                                                                                                                                                                                                                                                                                                                | -                                | -                            | P_trifoliata_00021_mRNA_119.1   |
| GF0043828 | 0                             | 0                         | 0                            | 1 Cytochrome c oxidase assembly protein COX19 (1)             |                                                                                                                                                                                                                                                                                                                                                                                                                                                               | CHCH [IPR010625] (1)                                                                                                                                                                                                                                                                                                                                           | -                                | -                            | P_trifoliata_00021_mRNA_106.1   |
| GF0043827 | 0                             | 0                         | 0                            | 1 Hypothetical protein (1)                                    |                                                                                                                                                                                                                                                                                                                                                                                                                                                               |                                                                                                                                                                                                                                                                                                                                                                | -                                | -                            | P_trifoliata_00020_mRNA_78.1    |
| GF0043826 | 0                             | 0                         | 0                            | 1 Hypothetical protein (1)                                    |                                                                                                                                                                                                                                                                                                                                                                                                                                                               |                                                                                                                                                                                                                                                                                                                                                                | -                                | -                            | P_trifoliata_00020_mRNA_51.1    |
| GF0043825 | 0                             | 0                         | 0                            | 1 Hypothetical protein (1)                                    |                                                                                                                                                                                                                                                                                                                                                                                                                                                               |                                                                                                                                                                                                                                                                                                                                                                | -                                | -                            | P_trifoliata_00020_mRNA_4.1     |
| GF0043824 | 0                             | 0                         | 0                            | 1 Hypothetical protein (1)                                    |                                                                                                                                                                                                                                                                                                                                                                                                                                                               |                                                                                                                                                                                                                                                                                                                                                                | -                                | -                            | P_trifoliata_00020_mRNA_39.1    |
| GF0043823 | 0                             | 0                         | 0                            | 1 Hypothetical protein (1)                                    |                                                                                                                                                                                                                                                                                                                                                                                                                                                               | Protein of unknown function DUF247, plant [IPR004158] (1)                                                                                                                                                                                                                                                                                                      | -                                | -                            | P_trifoliata_00020_mRNA_38.1    |
| GF0043822 | 0                             | 0                         | 0                            | 1 Hypothetical protein (1)                                    |                                                                                                                                                                                                                                                                                                                                                                                                                                                               |                                                                                                                                                                                                                                                                                                                                                                | -                                | -                            | P_trifoliata_00020_mRNA_37.1    |
| GF0043821 | 0                             | 0                         | 0                            | 1 Hypothetical protein (1)                                    |                                                                                                                                                                                                                                                                                                                                                                                                                                                               | Gag-polyprotein of LTR, copia-type [IPR029472] (1)                                                                                                                                                                                                                                                                                                             | -                                | -                            | P_trifoliata_00020_mRNA_28.1    |
| GF0043820 | 0                             | 0                         | 0                            | 1 Hypothetical protein (1)                                    |                                                                                                                                                                                                                                                                                                                                                                                                                                                               |                                                                                                                                                                                                                                                                                                                                                                | -                                | -                            | P_trifoliata_00020_mRNA_26.1    |
| GF0043819 | 0                             | 0                         | 0                            | 1 Hypothetical protein (1)                                    |                                                                                                                                                                                                                                                                                                                                                                                                                                                               |                                                                                                                                                                                                                                                                                                                                                                | -                                | -                            | P_trifoliata_00020_mRNA_2.1     |
| GF0043818 | 0                             | 0                         | 0                            | 1 Hypothetical protein (1)                                    | O-methyltransferase activity [GO:0008171 molecular_function] (1)                                                                                                                                                                                                                                                                                                                                                                                              | S-adenosyl-L-methionine-dependent methyltransferase [IPR029063] (1); O-methyltransferase, family 3 [IPR002935] (1)                                                                                                                                                                                                                                             | -                                | -                            | P_trifoliata_00020_mRNA_16.1    |
| GF0043817 | 0                             | 0                         | 0                            | 1 Hypothetical protein (1)                                    |                                                                                                                                                                                                                                                                                                                                                                                                                                                               |                                                                                                                                                                                                                                                                                                                                                                | -                                | -                            | P_trifoliata_00020_mRNA_128.1   |
| GF0043816 | 0                             | 0                         | 0                            | 1 Phospholipase, patatin family (1)                           | metabolic process [GO:0008152 biological_process] (1)                                                                                                                                                                                                                                                                                                                                                                                                         | Acyl transferase/acyl hydrolase/lysophospholipase [IPR016035] (1)                                                                                                                                                                                                                                                                                              | -                                | -                            | P_trifoliata_00020_mRNA_125.1   |
| GF0043815 | 0                             | 0                         | 0                            | 1 Hypothetical protein (1)                                    |                                                                                                                                                                                                                                                                                                                                                                                                                                                               |                                                                                                                                                                                                                                                                                                                                                                | -                                | -                            | P_trifoliata_00020_mRNA_121.1   |
| GF0043814 | 0                             | 0                         | 0                            | 1 Hypothetical protein (1)                                    |                                                                                                                                                                                                                                                                                                                                                                                                                                                               |                                                                                                                                                                                                                                                                                                                                                                | -                                | -                            | P_trifoliata_00020_mRNA_111.1   |
| GF0043813 | 0                             | 0                         | 0                            | 1 Hypothetical protein (1)                                    | protein binding [GO:000515 molecular_function] (1); signal transduction [GO:0007165 biological_process] (1)                                                                                                                                                                                                                                                                                                                                                   | Toll/interleukin-1 receptor homology (TIR) domain [IPR000157] (1)                                                                                                                                                                                                                                                                                              | -                                | -                            | P_trifoliata_00020_mRNA_104.1   |
| GF0043812 | 0                             | 0                         | 0                            | 1 Hypothetical protein (1)                                    |                                                                                                                                                                                                                                                                                                                                                                                                                                                               |                                                                                                                                                                                                                                                                                                                                                                | -                                | -                            | P_trifoliata_00020_mRNA_101.1   |
| GF0043811 | 0                             | 0                         | 0                            | 1 Hypothetical protein (1)                                    | nucleic acid binding [GO:0003676 molecular_function] (1)                                                                                                                                                                                                                                                                                                                                                                                                      | Ribonuclease H-like domain [IPR012337] (1)                                                                                                                                                                                                                                                                                                                     | -                                | -                            | P_trifoliata_00019_mRNA_96.1    |
| GF0043810 | 0                             | 0                         | 0                            | 1 Hypothetical protein (1)                                    |                                                                                                                                                                                                                                                                                                                                                                                                                                                               |                                                                                                                                                                                                                                                                                                                                                                | -                                | -                            | P_trifoliata_00019_mRNA_95.1    |
| GF0043809 | 0                             | 0                         | 0                            | 1 Receptor like protein 27 (1)                                |                                                                                                                                                                                                                                                                                                                                                                                                                                                               | Leucine-rich repeat domain, L domain-like [IPR032675] (1)                                                                                                                                                                                                                                                                                                      | -                                | -                            | P_trifoliata_00019_mRNA_92.1    |
| GF0043808 | 0                             | 0                         | 0                            | 1 Hypothetical protein (1)                                    |                                                                                                                                                                                                                                                                                                                                                                                                                                                               |                                                                                                                                                                                                                                                                                                                                                                | -                                | -                            | P_trifoliata_00019_mRNA_91.1    |
| GF0043807 | 0                             | 0                         | 0                            | 1 Hypothetical protein (1)                                    |                                                                                                                                                                                                                                                                                                                                                                                                                                                               |                                                                                                                                                                                                                                                                                                                                                                | -                                | -                            | P_trifoliata_00019_mRNA_90.1    |
| GF0043806 | 0                             | 0                         | 0                            | 1 NB-ARC domain disease resistance protein (1)                | ADP binding [GO:0043531 molecular_function] (1)                                                                                                                                                                                                                                                                                                                                                                                                               | NB-ARC [IPR002182] (1); P-loop containing nucleoside triphosphate hydrolase [IPR027417] (1)                                                                                                                                                                                                                                                                    | -                                | -                            | P_trifoliata_00019_mRNA_89.1    |
| GF0043805 | 0                             | 0                         | 0                            | 1 Putative disease resistance gene NBS-LRR family protein (1) |                                                                                                                                                                                                                                                                                                                                                                                                                                                               | Leucine-rich repeat domain, L domain-like [IPR032675] (1)                                                                                                                                                                                                                                                                                                      | -                                | -                            | P_trifoliata_00019_mRNA_87.1    |
| GF0043804 | 0                             | 0                         | 0                            | 1 Hypothetical protein (1)                                    |                                                                                                                                                                                                                                                                                                                                                                                                                                                               |                                                                                                                                                                                                                                                                                                                                                                | -                                | -                            | P_trifoliata_00019_mRNA_85.1    |
| GF0043803 | 0                             | 0                         | 0                            | 1 Hypothetical protein (1)                                    |                                                                                                                                                                                                                                                                                                                                                                                                                                                               |                                                                                                                                                                                                                                                                                                                                                                | -                                | -                            | P_trifoliata_00019_mRNA_84.1    |
| GF0043802 | 0                             | 0                         | 0                            | 1 Hypothetical protein (1)                                    |                                                                                                                                                                                                                                                                                                                                                                                                                                                               |                                                                                                                                                                                                                                                                                                                                                                | -                                | -                            | P_trifoliata_00019_mRNA_83.1    |
| GF0043801 | 0                             | 0                         | 0                            | 1 Hypothetical protein (1)                                    |                                                                                                                                                                                                                                                                                                                                                                                                                                                               |                                                                                                                                                                                                                                                                                                                                                                | -                                | -                            | P_trifoliata_00019_mRNA_81.1    |
| GF0043800 | 0                             | 0                         | 0                            | 1 Hypothetical protein (1)                                    |                                                                                                                                                                                                                                                                                                                                                                                                                                                               |                                                                                                                                                                                                                                                                                                                                                                | -                                | -                            | P_trifoliata_00019_mRNA_63.1    |
| GF0043799 | 0                             | 0                         | 0                            | 1 Hypothetical protein (1)                                    |                                                                                                                                                                                                                                                                                                                                                                                                                                                               |                                                                                                                                                                                                                                                                                                                                                                | -                                | -                            | P_trifoliata_00019_mRNA_59.1    |
| GF0043798 | 0                             | 0                         | 0                            | 1 Xylem serine proteinase 1 (1)                               |                                                                                                                                                                                                                                                                                                                                                                                                                                                               | Peptidase S8, subtilisin-related [IPR015500] (1)                                                                                                                                                                                                                                                                                                               | -                                | -                            | P_trifoliata_00019_mRNA_51.1    |
| GF0043797 | 0                             | 0                         | 0                            | 1 Basic helix-loop-helix family protein (1)                   | protein dimerization activity [GO:0040983 molecular_function] (1); nucleotide binding [GO:0000166 molecular_function] (1); nucleic acid binding [GO:0003676 molecular_function] (1)                                                                                                                                                                                                                                                                           | Myc-type, basic helix-loop-helix (bHLH) domain [IPR011598] (1)                                                                                                                                                                                                                                                                                                 | -                                | -                            | P_trifoliata_00019_mRNA_46.1    |
| GF0043796 | 0                             | 0                         | 0                            | 1 Hypothetical protein (1)                                    |                                                                                                                                                                                                                                                                                                                                                                                                                                                               | RNA recognition motif domain [IPR006041] (1); Nucleotide-binding alpha-beta plat domain [IPR012677] (1)                                                                                                                                                                                                                                                        | -                                | -                            | P_trifoliata_00019_mRNA_43.1    |
| GF0043795 | 0                             | 0                         | 0                            | 1 Hypothetical protein (1)                                    |                                                                                                                                                                                                                                                                                                                                                                                                                                                               |                                                                                                                                                                                                                                                                                                                                                                | -                                | -                            | P_trifoliata_00019_mRNA_32.1    |
| GF0043794 | 0                             | 0                         | 0                            | 1 Hypothetical protein (1)                                    |                                                                                                                                                                                                                                                                                                                                                                                                                                                               |                                                                                                                                                                                                                                                                                                                                                                | -                                | -                            | P_trifoliata_00019_mRNA_22.1    |
| GF0043793 | 0                             | 0                         | 0                            | 1 Hypothetical protein (1)                                    |                                                                                                                                                                                                                                                                                                                                                                                                                                                               |                                                                                                                                                                                                                                                                                                                                                                | -                                | -                            | P_trifoliata_00019_mRNA_158.1   |
| GF0043792 | 0                             | 0                         | 0                            | 1 Hypothetical protein (1)                                    |                                                                                                                                                                                                                                                                                                                                                                                                                                                               | Viral movement protein [IPR028919] (1)                                                                                                                                                                                                                                                                                                                         | -                                | -                            | P_trifoliata_00019_mRNA_156.1   |
| GF0043791 | 0                             | 0                         | 0                            | 1 Hypothetical protein (1)                                    | binding [GO:0005488 molecular_function] (1); mRNA cis splicing, via spliceosome [GO:0045292 biological_process] (1); nuclear cap binding complex [GO:0005846 cellular_component] (1); protein binding [GO:000515 molecular_function] (1); RNA cap binding [GO:0000339 molecular_function] (1); RNA metabolic process [GO:0016070 biological_process] (1); mRNA transport [GO:0051028 biological_process] (1); RNA binding [GO:0003725 molecular_function] (1) | Nuclear cap-binding protein subunit 1 [IPR027159] (1); MIF4G-like, type 1 [IPR015173] (1); MIF4G-like, type 2 [IPR003890] (1); Armadillo-type fold [IPR016024] (1); MIF4G-like domain [IPR016021] (1)                                                                                                                                                          | -                                | -                            | P_trifoliata_00019_mRNA_154.1   |
| GF0043790 | 0                             | 0                         | 0                            | 1 Hypothetical protein (1)                                    |                                                                                                                                                                                                                                                                                                                                                                                                                                                               | Bifunctional inhibitor/plant lipid transfer protein/seed storage helical domain [IPR016140] (1)                                                                                                                                                                                                                                                                | -                                | -                            | P_trifoliata_00019_mRNA_150.1   |
| GF0043789 | 0                             | 0                         | 0                            | 1 Hypothetical protein (1)                                    |                                                                                                                                                                                                                                                                                                                                                                                                                                                               |                                                                                                                                                                                                                                                                                                                                                                | -                                | -                            | P_trifoliata_00019_mRNA_147.1   |
| GF0043788 | 0                             | 0                         | 0                            | 1 Hypothetical protein (1)                                    | zinc ion binding [GO:0008270 molecular_function] (1); regulation of transcription, DNA-templated [GO:0006355 biological_process] (1); DNA binding [GO:0003677 molecular_function] (1); nucleic acid binding [GO:0003676 molecular_function] (1)                                                                                                                                                                                                               | Zinc finger, CCHC-type [IPR001878] (1); MULE transposase domain [IPR018289] (1); NAC domain [IPR003441] (1)                                                                                                                                                                                                                                                    | -                                | -                            | P_trifoliata_00019_mRNA_142.1   |
| GF0043787 | 0                             | 0                         | 0                            | 1 Hypothetical protein (1)                                    |                                                                                                                                                                                                                                                                                                                                                                                                                                                               |                                                                                                                                                                                                                                                                                                                                                                | -                                | -                            | P_trifoliata_00019_mRNA_141.1   |
| GF0043786 | 0                             | 0                         | 0                            | 1 Hypothetical protein (1)                                    |                                                                                                                                                                                                                                                                                                                                                                                                                                                               |                                                                                                                                                                                                                                                                                                                                                                | -                                | -                            | P_trifoliata_00019_mRNA_135.1   |

| ID        | Num. in <i>C. clementiae</i> | Num. in <i>C. canihii</i> | Num. in <i>P. trifoliata</i> | Note                                                                 | GO                                                                                                                                                                                                                                                                                                                 | InterPro                                                                                                                                                        | Members in <i>C. clementiae</i> | Members in <i>C. canihii</i> | Members in <i>P. trifoliata</i> |
|-----------|------------------------------|---------------------------|------------------------------|----------------------------------------------------------------------|--------------------------------------------------------------------------------------------------------------------------------------------------------------------------------------------------------------------------------------------------------------------------------------------------------------------|-----------------------------------------------------------------------------------------------------------------------------------------------------------------|---------------------------------|------------------------------|---------------------------------|
| GF0043785 | 0                            | 0                         | 1                            | Hypothetical protein (1)                                             |                                                                                                                                                                                                                                                                                                                    | Reverse transcriptase zinc-binding domain [IPRO26960] (1)                                                                                                       | -                               | -                            | P_trifoliata_00019_mRNA_123.1   |
| GF0043784 | 0                            | 0                         | 1                            | Hypothetical protein (1)                                             |                                                                                                                                                                                                                                                                                                                    |                                                                                                                                                                 | -                               | -                            | P_trifoliata_00019_mRNA_118.1   |
| GF0043783 | 0                            | 0                         | 1                            | Hypothetical protein (1)                                             |                                                                                                                                                                                                                                                                                                                    |                                                                                                                                                                 | -                               | -                            | P_trifoliata_00019_mRNA_115.1   |
| GF0043782 | 0                            | 0                         | 1                            | Hypothetical protein (1)                                             |                                                                                                                                                                                                                                                                                                                    |                                                                                                                                                                 | -                               | -                            | P_trifoliata_00019_mRNA_114.1   |
| GF0043781 | 0                            | 0                         | 1                            | DUF642 family protein (1)                                            |                                                                                                                                                                                                                                                                                                                    | Domain of unknown function DUF642 [IPRO06946] (1)                                                                                                               | -                               | -                            | P_trifoliata_00019_mRNA_104.1   |
| GF0043780 | 0                            | 0                         | 1                            | Hypothetical protein (1)                                             |                                                                                                                                                                                                                                                                                                                    |                                                                                                                                                                 | -                               | -                            | P_trifoliata_00018_mRNA_84.1    |
| GF0043779 | 0                            | 0                         | 1                            | Hypothetical protein (1)                                             |                                                                                                                                                                                                                                                                                                                    |                                                                                                                                                                 | -                               | -                            | P_trifoliata_00018_mRNA_70.1    |
| GF0043778 | 0                            | 0                         | 1                            | Hypothetical protein (1)                                             |                                                                                                                                                                                                                                                                                                                    |                                                                                                                                                                 | -                               | -                            | P_trifoliata_00018_mRNA_7.1     |
| GF0043777 | 0                            | 0                         | 1                            | Hypothetical protein (1)                                             |                                                                                                                                                                                                                                                                                                                    |                                                                                                                                                                 | -                               | -                            | P_trifoliata_00018_mRNA_69.1    |
| GF0043776 | 0                            | 0                         | 1                            | C3HC4 type RING-finger protein (1)                                   | protein binding [GO:0005515]<br>molecular_function (1); zinc ion binding [GO:0008270 molecular_function] (1)                                                                                                                                                                                                       | Zinc finger, RING/FYVE/PHD-type [IPRO13083] (1); Zinc finger, RING-type [IPRO1841] (1)                                                                          | -                               | -                            | P_trifoliata_00018_mRNA_55.1    |
| GF0043775 | 0                            | 0                         | 1                            | Hypothetical protein (1)                                             |                                                                                                                                                                                                                                                                                                                    |                                                                                                                                                                 | -                               | -                            | P_trifoliata_00018_mRNA_50.1    |
| GF0043774 | 0                            | 0                         | 1                            | Hypothetical protein (1)                                             |                                                                                                                                                                                                                                                                                                                    |                                                                                                                                                                 | -                               | -                            | P_trifoliata_00018_mRNA_5.1     |
| GF0043773 | 0                            | 0                         | 1                            | Hypothetical protein (1)                                             |                                                                                                                                                                                                                                                                                                                    | Domain of unknown function DUF4283 [IPRO25558] (1)                                                                                                              | -                               | -                            | P_trifoliata_00018_mRNA_48.1    |
| GF0043772 | 0                            | 0                         | 1                            | Hypothetical protein (1)                                             | lipid metabolic process [GO:0006229 biological_process] (1)                                                                                                                                                                                                                                                        | Partial AB-hydrolase lipase domain [IPRO06953] (1); Alpha/Beta hydrolase fold [IPRO29058] (1)                                                                   | -                               | -                            | P_trifoliata_00018_mRNA_44.1    |
| GF0043771 | 0                            | 0                         | 1                            | Hypothetical protein (1)                                             |                                                                                                                                                                                                                                                                                                                    |                                                                                                                                                                 | -                               | -                            | P_trifoliata_00018_mRNA_43.1    |
| GF0043770 | 0                            | 0                         | 1                            | Hypothetical protein (1)                                             |                                                                                                                                                                                                                                                                                                                    | Alpha/Beta hydrolase fold [IPRO29058] (1)                                                                                                                       | -                               | -                            | P_trifoliata_00018_mRNA_42.1    |
| GF0043769 | 0                            | 0                         | 1                            | Hypothetical protein (1)                                             |                                                                                                                                                                                                                                                                                                                    |                                                                                                                                                                 | -                               | -                            | P_trifoliata_00018_mRNA_4.1     |
| GF0043768 | 0                            | 0                         | 1                            | Hypothetical protein (1)                                             |                                                                                                                                                                                                                                                                                                                    |                                                                                                                                                                 | -                               | -                            | P_trifoliata_00018_mRNA_39.1    |
| GF0043767 | 0                            | 0                         | 1                            | Hypothetical protein (1)                                             |                                                                                                                                                                                                                                                                                                                    |                                                                                                                                                                 | -                               | -                            | P_trifoliata_00018_mRNA_34.1    |
| GF0043766 | 0                            | 0                         | 1                            | Hypothetical protein (1)                                             |                                                                                                                                                                                                                                                                                                                    |                                                                                                                                                                 | -                               | -                            | P_trifoliata_00018_mRNA_31.1    |
| GF0043765 | 0                            | 0                         | 1                            | Putative mitochondrial chaperone bcs1 (1)                            | ATP binding [GO:0005524 molecular_function] (1)                                                                                                                                                                                                                                                                    | P-loop containing nucleoside triphosphate hydrolase [IPRO27417] (1); AAA-type ATPase, N-terminal domain [IPRO25753] (1); ATPase, AAA-type, core [IPRO03959] (1) | -                               | -                            | P_trifoliata_00018_mRNA_3.1     |
| GF0043764 | 0                            | 0                         | 1                            | Hypothetical protein (1)                                             | carbohydrate metabolic process [GO:0008975 biological_process] (1); hydrolase activity, hydrolyzing O-glycosyl compounds [GO:0004553 molecular_function] (1)                                                                                                                                                       | Glycoside hydrolase family 16 [IPRO00757] (1); Concavalin A-like lectin/glucanase domain [IPRO13320] (1)                                                        | -                               | -                            | P_trifoliata_00018_mRNA_2.1     |
| GF0043763 | 0                            | 0                         | 1                            | Hypothetical protein (1)                                             |                                                                                                                                                                                                                                                                                                                    |                                                                                                                                                                 | -                               | -                            | P_trifoliata_00018_mRNA_14.1    |
| GF0043762 | 0                            | 0                         | 1                            | Hypothetical protein (1)                                             |                                                                                                                                                                                                                                                                                                                    | RNA, pathogenic type III effector avirulence factor Avr cleavage site [IPRO08700] (1)                                                                           | -                               | -                            | P_trifoliata_00018_mRNA_135.1   |
| GF0043761 | 0                            | 0                         | 1                            | Hypothetical protein (1)                                             |                                                                                                                                                                                                                                                                                                                    |                                                                                                                                                                 | -                               | -                            | P_trifoliata_00018_mRNA_13.1    |
| GF0043760 | 0                            | 0                         | 1                            | Hypothetical protein (1)                                             |                                                                                                                                                                                                                                                                                                                    |                                                                                                                                                                 | -                               | -                            | P_trifoliata_00018_mRNA_123.1   |
| GF0043759 | 0                            | 0                         | 1                            | Hypothetical protein (1)                                             | nutrient reservoir activity [GO:0045735 molecular_function] (1)                                                                                                                                                                                                                                                    | RmlC-like cupin domain [IPRO11051] (1); RmlC-like jelly roll fold [IPRO14710] (1); Cupin 1 [IPRO06045] (1)                                                      | -                               | -                            | P_trifoliata_00018_mRNA_121.1   |
| GF0043758 | 0                            | 0                         | 1                            | Hypothetical protein (1)                                             |                                                                                                                                                                                                                                                                                                                    |                                                                                                                                                                 | -                               | -                            | P_trifoliata_00018_mRNA_12.1    |
| GF0043757 | 0                            | 0                         | 1                            | Hypothetical protein (1)                                             |                                                                                                                                                                                                                                                                                                                    | Glycine rich protein [IPRO10800] (1)                                                                                                                            | -                               | -                            | P_trifoliata_00018_mRNA_11.1    |
| GF0043756 | 0                            | 0                         | 1                            | Hypothetical protein (1)                                             |                                                                                                                                                                                                                                                                                                                    |                                                                                                                                                                 | -                               | -                            | P_trifoliata_00018_mRNA_103.1   |
| GF0043755 | 0                            | 0                         | 1                            | Hypothetical protein (1)                                             |                                                                                                                                                                                                                                                                                                                    |                                                                                                                                                                 | -                               | -                            | P_trifoliata_00018_mRNA_102.1   |
| GF0043754 | 0                            | 0                         | 1                            | Hypothetical protein (1)                                             |                                                                                                                                                                                                                                                                                                                    |                                                                                                                                                                 | -                               | -                            | P_trifoliata_00017_mRNA_99.1    |
| GF0043753 | 0                            | 0                         | 1                            | Hypothetical protein (1)                                             |                                                                                                                                                                                                                                                                                                                    |                                                                                                                                                                 | -                               | -                            | P_trifoliata_00017_mRNA_98.1    |
| GF0043752 | 0                            | 0                         | 1                            | Pectinacetyltransferase family protein (1)                           | hydrolase activity [GO:0016787 molecular_function] (1)                                                                                                                                                                                                                                                             | Reverse transcriptase zinc-binding domain [IPRO26960] (1)<br>Pectinacetyltransferase/NOTUM [IPRO04963] (1)                                                      | -                               | -                            | P_trifoliata_00017_mRNA_9.1     |
| GF0043751 | 0                            | 0                         | 1                            | Hypothetical protein (1)                                             |                                                                                                                                                                                                                                                                                                                    |                                                                                                                                                                 | -                               | -                            | P_trifoliata_00017_mRNA_88.1    |
| GF0043750 | 0                            | 0                         | 1                            | Hypothetical protein (1)                                             | regulation of transcription, DNA-templated [GO:0006355 biological_process] (1)                                                                                                                                                                                                                                     | FHY3/FAR1 family [IPRO11052] (1)                                                                                                                                | -                               | -                            | P_trifoliata_00017_mRNA_87.1    |
| GF0043749 | 0                            | 0                         | 1                            | Hypothetical protein (1)                                             |                                                                                                                                                                                                                                                                                                                    |                                                                                                                                                                 | -                               | -                            | P_trifoliata_00017_mRNA_8.1     |
| GF0043748 | 0                            | 0                         | 1                            | Hypothetical protein (1)                                             |                                                                                                                                                                                                                                                                                                                    |                                                                                                                                                                 | -                               | -                            | P_trifoliata_00017_mRNA_79.1    |
| GF0043747 | 0                            | 0                         | 1                            | Hypothetical protein (1)                                             |                                                                                                                                                                                                                                                                                                                    |                                                                                                                                                                 | -                               | -                            | P_trifoliata_00017_mRNA_78.1    |
| GF0043746 | 0                            | 0                         | 1                            | Hypothetical protein (1)                                             |                                                                                                                                                                                                                                                                                                                    |                                                                                                                                                                 | -                               | -                            | P_trifoliata_00017_mRNA_76.1    |
| GF0043745 | 0                            | 0                         | 1                            | Hypothetical protein (1)                                             | 3'-5' exonuclease activity [GO:0008408 molecular_function] (1); nucleobase-containing compound metabolic process [GO:0006139 biological_process] (1); nucleic acid binding [GO:0003676 molecular_function] (1)                                                                                                     | 3'-5' exonuclease domain [IPRO02562] (1); Ribonuclease H-like domain [IPRO12337] (1)                                                                            | -                               | -                            | P_trifoliata_00017_mRNA_8.1     |
| GF0043744 | 0                            | 0                         | 1                            | Hypothetical protein (1)                                             |                                                                                                                                                                                                                                                                                                                    |                                                                                                                                                                 | -                               | -                            | P_trifoliata_00017_mRNA_47.1    |
| GF0043743 | 0                            | 0                         | 1                            | Hypothetical protein (1)                                             |                                                                                                                                                                                                                                                                                                                    |                                                                                                                                                                 | -                               | -                            | P_trifoliata_00017_mRNA_41.1    |
| GF0043742 | 0                            | 0                         | 1                            | Hypothetical protein (1)                                             |                                                                                                                                                                                                                                                                                                                    |                                                                                                                                                                 | -                               | -                            | P_trifoliata_00017_mRNA_35.1    |
| GF0043741 | 0                            | 0                         | 1                            | Hypothetical protein (1)                                             |                                                                                                                                                                                                                                                                                                                    | Leucine-rich repeat domain, L domain-like [IPRO12675] (1)                                                                                                       | -                               | -                            | P_trifoliata_00017_mRNA_28.1    |
| GF0043740 | 0                            | 0                         | 1                            | Hypothetical protein (1)                                             | integral component of membrane [GO:0016021 cellular_component] (1); transmembrane transporter activity [GO:0022857 molecular_function] (1); transmembrane transport [GO:0055085 biological_process] (1)                                                                                                            | Major facilitator sugar transporter-like [IPRO05828] (1)                                                                                                        | -                               | -                            | P_trifoliata_00017_mRNA_23.1    |
| GF0043739 | 0                            | 0                         | 1                            | Hypothetical protein (1)                                             |                                                                                                                                                                                                                                                                                                                    |                                                                                                                                                                 | -                               | -                            | P_trifoliata_00017_mRNA_19.1    |
| GF0043738 | 0                            | 0                         | 1                            | Hypothetical protein (1)                                             |                                                                                                                                                                                                                                                                                                                    |                                                                                                                                                                 | -                               | -                            | P_trifoliata_00017_mRNA_18.1    |
| GF0043737 | 0                            | 0                         | 1                            | Hypothetical protein (1)                                             |                                                                                                                                                                                                                                                                                                                    |                                                                                                                                                                 | -                               | -                            | P_trifoliata_00017_mRNA_151.1   |
| GF0043736 | 0                            | 0                         | 1                            | Hypothetical protein (1)                                             |                                                                                                                                                                                                                                                                                                                    | Reverse transcriptase zinc-binding domain [IPRO26960] (1)                                                                                                       | -                               | -                            | P_trifoliata_00017_mRNA_150.1   |
| GF0043735 | 0                            | 0                         | 1                            | Lipid transfer protein (1)                                           |                                                                                                                                                                                                                                                                                                                    | Bi-functional inhibitor/plant lipid transfer protein/seed storage helical domain [IPRO16140] (1)                                                                | -                               | -                            | P_trifoliata_00017_mRNA_144.1   |
| GF0043734 | 0                            | 0                         | 1                            | Hypothetical protein (1)                                             |                                                                                                                                                                                                                                                                                                                    |                                                                                                                                                                 | -                               | -                            | P_trifoliata_00017_mRNA_136.1   |
| GF0043733 | 0                            | 0                         | 1                            | Hypothetical protein (1)                                             |                                                                                                                                                                                                                                                                                                                    |                                                                                                                                                                 | -                               | -                            | P_trifoliata_00017_mRNA_132.1   |
| GF0043732 | 0                            | 0                         | 1                            | Hypothetical protein (1)                                             |                                                                                                                                                                                                                                                                                                                    |                                                                                                                                                                 | -                               | -                            | P_trifoliata_00017_mRNA_12.1    |
| GF0043731 | 0                            | 0                         | 1                            | Hypothetical protein (1)                                             |                                                                                                                                                                                                                                                                                                                    |                                                                                                                                                                 | -                               | -                            | P_trifoliata_00017_mRNA_10.1    |
| GF0043730 | 0                            | 0                         | 1                            | Hypothetical protein (1)                                             |                                                                                                                                                                                                                                                                                                                    |                                                                                                                                                                 | -                               | -                            | P_trifoliata_00016_mRNA_94.1    |
| GF0043729 | 0                            | 0                         | 1                            | Hypothetical protein (1)                                             |                                                                                                                                                                                                                                                                                                                    |                                                                                                                                                                 | -                               | -                            | P_trifoliata_00016_mRNA_92.1    |
| GF0043728 | 0                            | 0                         | 1                            | Peptidyl-prolyl cis-trans isomerase CYP37 (1)                        | protein folding [GO:0006457 biological_process] (1); peptidyl-prolyl cis-trans isomerase activity [GO:0003755 molecular_function] (1)                                                                                                                                                                              | Cyclophilin-type peptidyl-prolyl cis-trans isomerase [IPRO24050] (1); Cyclophilin-like domain [IPRO29000] (1)                                                   | -                               | -                            | P_trifoliata_00016_mRNA_81.1    |
| GF0043727 | 0                            | 0                         | 1                            | Hypothetical protein (1)                                             |                                                                                                                                                                                                                                                                                                                    |                                                                                                                                                                 | -                               | -                            | P_trifoliata_00016_mRNA_78.1    |
| GF0043726 | 0                            | 0                         | 1                            | Hypothetical protein (1)                                             |                                                                                                                                                                                                                                                                                                                    | Domain of unknown function DUF1985 [IPRO15410] (1)                                                                                                              | -                               | -                            | P_trifoliata_00016_mRNA_75.1    |
| GF0043725 | 0                            | 0                         | 1                            | Hypothetical protein (1)                                             | zinc ion binding [GO:0008270 molecular_function] (1)                                                                                                                                                                                                                                                               | Transposase, MuDR, phi1 [IPRO04332] (1); Zinc finger, PMZ-type [IPRO06064] (1); Zinc finger, SWIM-type [IPRO07527] (1)                                          | -                               | -                            | P_trifoliata_00016_mRNA_74.1    |
| GF0043724 | 0                            | 0                         | 1                            | Cytochrome P450, family 88, subfamily A, polypeptide 3 isoform 3 (1) | iron ion binding [GO:0005506 molecular_function] (1); heme binding [GO:0020037 molecular_function] (1); oxidation-reduction process [GO:0055114 biological_process] (1); oxidoreductase activity, acting on paired donors, with incorporation or reduction of molecular oxygen [GO:0016705 molecular_function] (1) | Cytochrome P450 [IPRO01128] (1)                                                                                                                                 | -                               | -                            | P_trifoliata_00016_mRNA_71.1    |
| GF0043723 | 0                            | 0                         | 1                            | Hypothetical protein (1)                                             |                                                                                                                                                                                                                                                                                                                    |                                                                                                                                                                 | -                               | -                            | P_trifoliata_00016_mRNA_7.1     |
| GF0043722 | 0                            | 0                         | 1                            | Hypothetical protein (1)                                             |                                                                                                                                                                                                                                                                                                                    |                                                                                                                                                                 | -                               | -                            | P_trifoliata_00016_mRNA_65.1    |
| GF0043721 | 0                            | 0                         | 1                            | Hypothetical protein (1)                                             |                                                                                                                                                                                                                                                                                                                    |                                                                                                                                                                 | -                               | -                            | P_trifoliata_00016_mRNA_59.1    |
| GF0043720 | 0                            | 0                         | 1                            | Hypothetical protein (1)                                             |                                                                                                                                                                                                                                                                                                                    |                                                                                                                                                                 | -                               | -                            | P_trifoliata_00016_mRNA_58.1    |
| GF0043719 | 0                            | 0                         | 1                            | Hypothetical protein (1)                                             |                                                                                                                                                                                                                                                                                                                    |                                                                                                                                                                 | -                               | -                            | P_trifoliata_00016_mRNA_52.1    |
| GF0043718 | 0                            | 0                         | 1                            | Hypothetical protein (1)                                             |                                                                                                                                                                                                                                                                                                                    |                                                                                                                                                                 | -                               | -                            | P_trifoliata_00016_mRNA_51.1    |
| GF0043717 | 0                            | 0                         | 1                            | Hypothetical protein (1)                                             |                                                                                                                                                                                                                                                                                                                    |                                                                                                                                                                 | -                               | -                            | P_trifoliata_00016_mRNA_50.1    |
| GF0043716 | 0                            | 0                         | 1                            | Hypothetical protein (1)                                             |                                                                                                                                                                                                                                                                                                                    |                                                                                                                                                                 | -                               | -                            | P_trifoliata_00016_mRNA_44.1    |
| GF0043715 | 0                            | 0                         | 1                            | Hypothetical protein (1)                                             | proteolysis [GO:0006508 biological_process] (1); aspartic-type endopeptidase activity [GO:0004190 molecular_function] (1)                                                                                                                                                                                          | Xylanase inhibitor, N-terminal [IPRO13861] (1); Aspartic peptidase A1 family [IPRO01461] (1); Aspartic peptidase domain [IPRO021109] (1)                        | -                               | -                            | P_trifoliata_00016_mRNA_42.1    |
| GF0043714 | 0                            | 0                         | 1                            | Hypothetical protein (1)                                             |                                                                                                                                                                                                                                                                                                                    |                                                                                                                                                                 | -                               | -                            | P_trifoliata_00016_mRNA_41.1    |
| GF0043713 | 0                            | 0                         | 1                            | Hypothetical protein (1)                                             |                                                                                                                                                                                                                                                                                                                    |                                                                                                                                                                 | -                               | -                            | P_trifoliata_00016_mRNA_39.1    |
| GF0043712 | 0                            | 0                         | 1                            | Hypothetical protein (1)                                             |                                                                                                                                                                                                                                                                                                                    |                                                                                                                                                                 | -                               | -                            | P_trifoliata_00016_mRNA_28.1    |
| GF0043711 | 0                            | 0                         | 1                            | Hypothetical protein (1)                                             |                                                                                                                                                                                                                                                                                                                    |                                                                                                                                                                 | -                               | -                            | P_trifoliata_00016_mRNA_26.1    |
| GF0043710 | 0                            | 0                         | 1                            | Hypothetical protein (1)                                             |                                                                                                                                                                                                                                                                                                                    |                                                                                                                                                                 | -                               | -                            | P_trifoliata_00016_mRNA_24.1    |
| GF0043709 | 0                            | 0                         | 1                            | Hypothetical protein (1)                                             |                                                                                                                                                                                                                                                                                                                    |                                                                                                                                                                 | -                               | -                            | P_trifoliata_00016_mRNA_21.1    |
| GF0043708 | 0                            | 0                         | 1                            | Cationic amino acid transporter (1)                                  | membrane [GO:0016020 cellular_component] (1); amino acid transmembrane transport [GO:0003333 biological_process] (1); amino acid transmembrane transporter activity [GO:0015171 molecular_function] (1)                                                                                                            | Amino acid/polyamine transporter I [IPRO02293] (1)                                                                                                              | -                               | -                            | P_trifoliata_00016_mRNA_132.1   |
| GF0043707 | 0                            | 0                         | 1                            | Hypothetical protein (1)                                             |                                                                                                                                                                                                                                                                                                                    |                                                                                                                                                                 | -                               | -                            | P_trifoliata_00016_mRNA_130.1   |
| GF0043706 | 0                            | 0                         | 1                            | Hypothetical protein (1)                                             |                                                                                                                                                                                                                                                                                                                    |                                                                                                                                                                 | -                               | -                            | P_trifoliata_00016_mRNA_128.1   |

| ID        | Num. in <i>C. clementiae</i> | Num. in <i>C. canthii</i> | Num. in <i>P. trifoliata</i> | Note                                                                        | GO                                                                                                                                                                                                                                                                                                                | InterPro                                                                                                                                                                                                                      | Members in <i>C. clementiae</i> | Members in <i>C. canthii</i> | Members in <i>P. trifoliata</i> |
|-----------|------------------------------|---------------------------|------------------------------|-----------------------------------------------------------------------------|-------------------------------------------------------------------------------------------------------------------------------------------------------------------------------------------------------------------------------------------------------------------------------------------------------------------|-------------------------------------------------------------------------------------------------------------------------------------------------------------------------------------------------------------------------------|---------------------------------|------------------------------|---------------------------------|
| GF0043705 | 0                            | 0                         | 0                            | 1 Hypothetical protein (1)                                                  |                                                                                                                                                                                                                                                                                                                   |                                                                                                                                                                                                                               | -                               | -                            | P_trifoliata_00016_mRNA_126.1   |
| GF0043704 | 0                            | 0                         | 0                            | 1 Hypothetical protein (1)                                                  |                                                                                                                                                                                                                                                                                                                   |                                                                                                                                                                                                                               | -                               | -                            | P_trifoliata_00016_mRNA_122.1   |
| GF0043703 | 0                            | 0                         | 0                            | 1 Hypothetical protein (1)                                                  |                                                                                                                                                                                                                                                                                                                   |                                                                                                                                                                                                                               | -                               | -                            | P_trifoliata_00016_mRNA_120.1   |
| GF0043702 | 0                            | 0                         | 0                            | 1 Hypothetical protein (1)                                                  | FAD binding [GO:0071949 molecular_function] (1); oxidation-reduction process [GO:005514 biological_process] (1); oxidoreductase activity [GO:0016491 molecular_function] (1)                                                                                                                                      | FAD-binding domain [IPRO02938] (1); FAD/NAD(P)-binding domain [IPRO23753] (1)                                                                                                                                                 | -                               | -                            | P_trifoliata_00016_mRNA_115.1   |
| GF0043701 | 0                            | 0                         | 0                            | 1 Histone-binding protein RBBP4 (1)                                         | protein binding [GO:0005515 molecular_function] (1)                                                                                                                                                                                                                                                               | WD40-repeat-containing domain [IPRO17986] (1); WD40 repeat [IPRO16801] (1); WD40/YVTX repeat-like-containing domain [IPRO15943] (1); Histone-binding protein RBBP4, N-terminal [IPRO22052] (1)                                | -                               | -                            | P_trifoliata_00016_mRNA_111.1   |
| GF0043700 | 0                            | 0                         | 0                            | 1 Hypothetical protein (1)                                                  |                                                                                                                                                                                                                                                                                                                   |                                                                                                                                                                                                                               | -                               | -                            | P_trifoliata_00016_mRNA_1.1     |
| GF0043699 | 0                            | 0                         | 0                            | 1 Golgi apparatus membrane protein TVP23 (1)                                | integral component of membrane [GO:0016021 cellular_component] (1)                                                                                                                                                                                                                                                | Protein of unknown function DUF846, eukaryotic [IPRO08564] (1)                                                                                                                                                                | -                               | -                            | P_trifoliata_00015_mRNA_89.1    |
| GF0043698 | 0                            | 0                         | 0                            | 1 Hypothetical protein (1)                                                  |                                                                                                                                                                                                                                                                                                                   | Translation protein, beta-barrel domain [IPRO09002] (1)                                                                                                                                                                       | -                               | -                            | P_trifoliata_00015_mRNA_86.1    |
| GF0043697 | 0                            | 0                         | 0                            | 1 Hypothetical protein (1)                                                  | cellular amino acid metabolic process [GO:0006520 biological_process] (1); oxidation-reduction process [GO:005514 biological_process] (1)                                                                                                                                                                         | Homoserine dehydrogenase, catalytic [IPRO01342] (1); Glutathione S-transferase, C-terminal-like [IPRO10987] (1); NAD(P)-binding domain [IPRO16040] (1)                                                                        | -                               | -                            | P_trifoliata_00015_mRNA_8.1     |
| GF0043696 | 0                            | 0                         | 0                            | 1 Hypothetical protein (1)                                                  |                                                                                                                                                                                                                                                                                                                   |                                                                                                                                                                                                                               | -                               | -                            | P_trifoliata_00015_mRNA_72.1    |
| GF0043695 | 0                            | 0                         | 0                            | 1 Hypothetical protein (1)                                                  |                                                                                                                                                                                                                                                                                                                   |                                                                                                                                                                                                                               | -                               | -                            | P_trifoliata_00015_mRNA_68.1    |
| GF0043694 | 0                            | 0                         | 0                            | 1 Progesterone 5-beta-reductase (1)                                         | coenzyme binding [GO:0050662 molecular_function] (1); catalytic activity [GO:0003524 molecular_function] (1)                                                                                                                                                                                                      | NAD(P)-binding domain [IPRO16040] (1); NAD-dependent epimerase/dehydratase, N-terminal domain [IPRO01509] (1)                                                                                                                 | -                               | -                            | P_trifoliata_00015_mRNA_59.1    |
| GF0043693 | 0                            | 0                         | 0                            | 1 Hypothetical protein (1)                                                  |                                                                                                                                                                                                                                                                                                                   |                                                                                                                                                                                                                               | -                               | -                            | P_trifoliata_00015_mRNA_41.1    |
| GF0043692 | 0                            | 0                         | 0                            | 1 Hypothetical protein (1)                                                  |                                                                                                                                                                                                                                                                                                                   |                                                                                                                                                                                                                               | -                               | -                            | P_trifoliata_00015_mRNA_31.1    |
| GF0043691 | 0                            | 0                         | 0                            | 1 Hypothetical protein (1)                                                  |                                                                                                                                                                                                                                                                                                                   |                                                                                                                                                                                                                               | -                               | -                            | P_trifoliata_00015_mRNA_24.1    |
| GF0043690 | 0                            | 0                         | 0                            | 1 Hypothetical protein (1)                                                  | nucleotide binding [GO:0000166 molecular_function] (1); metal ion binding [GO:0046872 molecular_function] (1)                                                                                                                                                                                                     | P-type ATPase, A domain [IPRO08250] (1)                                                                                                                                                                                       | -                               | -                            | P_trifoliata_00015_mRNA_21.1    |
| GF0043689 | 0                            | 0                         | 0                            | 1 SAL1 phosphatase-like protein (1)                                         | phosphatidylinositol phosphorylation [GO:0046854 biological_process] (1)                                                                                                                                                                                                                                          | Inositol monophosphatase [IPRO00760] (1); Inositol monophosphatase, conserved site [IPRO20550] (1)                                                                                                                            | -                               | -                            | P_trifoliata_00015_mRNA_190.1   |
| GF0043688 | 0                            | 0                         | 0                            | 1 Hypothetical protein (1)                                                  |                                                                                                                                                                                                                                                                                                                   |                                                                                                                                                                                                                               | -                               | -                            | P_trifoliata_00015_mRNA_189.1   |
| GF0043687 | 0                            | 0                         | 0                            | 1 Hypothetical protein (1)                                                  |                                                                                                                                                                                                                                                                                                                   |                                                                                                                                                                                                                               | -                               | -                            | P_trifoliata_00015_mRNA_177.1   |
| GF0043686 | 0                            | 0                         | 0                            | 1 Hypothetical protein (1)                                                  |                                                                                                                                                                                                                                                                                                                   |                                                                                                                                                                                                                               | -                               | -                            | P_trifoliata_00015_mRNA_176.1   |
| GF0043685 | 0                            | 0                         | 0                            | 1 Hypothetical protein (1)                                                  | protein binding [GO:0005515 molecular_function] (1)                                                                                                                                                                                                                                                               | F-box domain [IPRO01810] (1); Leucine-rich repeat domain, L domain-like [IPRO132675] (1); Pilosom protein 2-like [IPRO25886] (1)                                                                                              | -                               | -                            | P_trifoliata_00015_mRNA_171.1   |
| GF0043684 | 0                            | 0                         | 0                            | 1 Hypothetical protein (1)                                                  |                                                                                                                                                                                                                                                                                                                   |                                                                                                                                                                                                                               | -                               | -                            | P_trifoliata_00015_mRNA_166.1   |
| GF0043683 | 0                            | 0                         | 0                            | 1 Hypothetical protein (1)                                                  |                                                                                                                                                                                                                                                                                                                   |                                                                                                                                                                                                                               | -                               | -                            | P_trifoliata_00015_mRNA_150.1   |
| GF0043682 | 0                            | 0                         | 0                            | 1 Hypothetical protein (1)                                                  |                                                                                                                                                                                                                                                                                                                   |                                                                                                                                                                                                                               | -                               | -                            | P_trifoliata_00015_mRNA_149.1   |
| GF0043681 | 0                            | 0                         | 0                            | 1 Hypothetical protein (1)                                                  |                                                                                                                                                                                                                                                                                                                   |                                                                                                                                                                                                                               | -                               | -                            | P_trifoliata_00015_mRNA_148.1   |
| GF0043680 | 0                            | 0                         | 0                            | 1 Hypothetical protein (1)                                                  | protein binding [GO:0005515 molecular_function] (1)                                                                                                                                                                                                                                                               | Leucine-rich repeat domain, L domain-like [IPRO132675] (1); Leucine-rich repeat [IPRO01611] (1)                                                                                                                               | -                               | -                            | P_trifoliata_00015_mRNA_112.1   |
| GF0043679 | 0                            | 0                         | 0                            | 1 Hypothetical protein (1)                                                  | membrane [GO:0046020 cellular_component] (1); transport [GO:0006810 biological_process] (1); transporter activity [GO:0005215 molecular_function] (1)                                                                                                                                                             | Protein-dependent oligopeptide transporter family [IPRO00109] (1)                                                                                                                                                             | -                               | -                            | P_trifoliata_00015_mRNA_103.1   |
| GF0043678 | 0                            | 0                         | 0                            | 1 Hydroxyproline-rich glycoprotein family protein (1)                       |                                                                                                                                                                                                                                                                                                                   | Spo12 [IPRO07727] (1)                                                                                                                                                                                                         | -                               | -                            | P_trifoliata_00015_mRNA_100.1   |
| GF0043677 | 0                            | 0                         | 0                            | 1 Germin-like protein subfamily 2 member 4 (1)                              | nutrient reservoir activity [GO:0045735 molecular_function] (1); manganese ion binding [GO:0030145 molecular_function] (1)                                                                                                                                                                                        | RmlC-like cupin domain [IPRO11051] (1); Germin, manganese-binding site [IPRO19780] (1); Cupin 1 [IPRO06045] (1); RmlC-like jelly roll fold [IPRO14710] (1); Germin [IPRO01929] (1)                                            | -                               | -                            | P_trifoliata_00014_mRNA_88.1    |
| GF0043676 | 0                            | 0                         | 0                            | 1 Hypothetical protein (1)                                                  | protein serine/threonine phosphatase activity [GO:0004722 molecular_function] (1); protein dephosphorylation [GO:0006470 biological_process] (1)                                                                                                                                                                  | Protein phosphatase 2C family [IPRO15655] (1)                                                                                                                                                                                 | -                               | -                            | P_trifoliata_00014_mRNA_86.1    |
| GF0043675 | 0                            | 0                         | 0                            | 1 Hypothetical protein (1)                                                  | iron ion binding [GO:0005506 molecular_function] (1); heme binding [GO:0020037 molecular_function] (1); oxidoreductase activity, acting on paired donors, with incorporation or reduction of molecular oxygen [GO:0016705 molecular_function] (1); oxidation-reduction process [GO:005514 biological_process] (1) | Cytochrome P450 [IPRO01128] (1); Cytochrome P450, conserved site [IPRO17972] (1)                                                                                                                                              | -                               | -                            | P_trifoliata_00014_mRNA_78.1    |
| GF0043674 | 0                            | 0                         | 0                            | 1 ASYNAPTIC 3 (1)                                                           |                                                                                                                                                                                                                                                                                                                   |                                                                                                                                                                                                                               | -                               | -                            | P_trifoliata_00014_mRNA_74.1    |
| GF0043673 | 0                            | 0                         | 0                            | 1 WRKY transcription factor 6 (1)                                           | transcription factor activity, sequence-specific DNA binding [GO:0003700 molecular_function] (1); sequence-specific DNA binding [GO:0043565 molecular_function] (1); regulation of transcription, DNA-templated [GO:0006355 biological_process] (1)                                                               | WRKY domain [IPRO03657] (1)                                                                                                                                                                                                   | -                               | -                            | P_trifoliata_00014_mRNA_70.1    |
| GF0043672 | 0                            | 0                         | 0                            | 1 Hypothetical protein (1)                                                  |                                                                                                                                                                                                                                                                                                                   |                                                                                                                                                                                                                               | -                               | -                            | P_trifoliata_00014_mRNA_60.1    |
| GF0043671 | 0                            | 0                         | 0                            | 1 Peroxidase 1 (1)                                                          | oxidation-reduction process [GO:005514 biological_process] (1); peroxidase activity [GO:0004601 molecular_function] (1); response to oxidative stress [GO:0006979 biological_process] (1); heme binding [GO:0020037 molecular_function] (1)                                                                       | Plant peroxidase [IPRO00823] (1); Peroxidase, active site [IPRO19794] (1); Haem peroxidase, plant/fungal/bacterial [IPRO02016] (1); Haem peroxidase [IPRO10255] (1)                                                           | -                               | -                            | P_trifoliata_00014_mRNA_41.1    |
| GF0043670 | 0                            | 0                         | 0                            | 1 Hypothetical protein (1)                                                  |                                                                                                                                                                                                                                                                                                                   |                                                                                                                                                                                                                               | -                               | -                            | P_trifoliata_00014_mRNA_4.1     |
| GF0043669 | 0                            | 0                         | 0                            | 1 Hypothetical protein (1)                                                  |                                                                                                                                                                                                                                                                                                                   |                                                                                                                                                                                                                               | -                               | -                            | P_trifoliata_00014_mRNA_3.1     |
| GF0043668 | 0                            | 0                         | 0                            | 1 Heat shock cognate 70 kDa protein 2 (1)                                   |                                                                                                                                                                                                                                                                                                                   | Heat shock protein 70kD, C-terminal domain [IPRO29048] (1)                                                                                                                                                                    | -                               | -                            | P_trifoliata_00014_mRNA_26.1    |
| GF0043667 | 0                            | 0                         | 0                            | 1 Hypothetical protein (1)                                                  |                                                                                                                                                                                                                                                                                                                   |                                                                                                                                                                                                                               | -                               | -                            | P_trifoliata_00014_mRNA_24.1    |
| GF0043666 | 0                            | 0                         | 0                            | 1 Hypothetical protein (1)                                                  |                                                                                                                                                                                                                                                                                                                   |                                                                                                                                                                                                                               | -                               | -                            | P_trifoliata_00014_mRNA_2.1     |
| GF0043665 | 0                            | 0                         | 0                            | 1 DNA-directed RNA polymerase subunit 4 (1)                                 | zinc ion binding [GO:0008270 molecular_function] (1); transcription, DNA-templated [GO:0006351 biological_process] (1); DNA-directed RNA polymerase activity [GO:0003899 molecular_function] (1); DNA binding [GO:0005677 molecular_function] (1); nucleic acid binding [GO:0003676 molecular_function] (1)       | Nudix hydrolase, N-terminal [IPRO29401] (1); DNA-directed RNA polymerase subunit/transcription factor S [IPRO21264] (1); Zinc finger, TETIS-type [IPRO01222] (1); DNA-directed RNA polymerase, M15kDa subunit [IPRO01529] (1) | -                               | -                            | P_trifoliata_00014_mRNA_177.1   |
| GF0043664 | 0                            | 0                         | 0                            | 1 Hypothetical protein (1)                                                  |                                                                                                                                                                                                                                                                                                                   |                                                                                                                                                                                                                               | -                               | -                            | P_trifoliata_00014_mRNA_172.1   |
| GF0043663 | 0                            | 0                         | 0                            | 1 Hypothetical protein (1)                                                  |                                                                                                                                                                                                                                                                                                                   |                                                                                                                                                                                                                               | -                               | -                            | P_trifoliata_00014_mRNA_158.1   |
| GF0043662 | 0                            | 0                         | 0                            | 1 Hypothetical protein (1)                                                  |                                                                                                                                                                                                                                                                                                                   |                                                                                                                                                                                                                               | -                               | -                            | P_trifoliata_00014_mRNA_148.1   |
| GF0043661 | 0                            | 0                         | 0                            | 1 Hypothetical protein (1)                                                  |                                                                                                                                                                                                                                                                                                                   |                                                                                                                                                                                                                               | -                               | -                            | P_trifoliata_00014_mRNA_138.1   |
| GF0043660 | 0                            | 0                         | 0                            | 1 Hypothetical protein (1)                                                  | cation transport [GO:0006812 biological_process] (1); cation transmembrane transporter activity [GO:0008324 molecular_function] (1); integral component of membrane [GO:0016021 cellular_component] (1); transmembrane transport [GO:0055085 biological_process] (1)                                              | Cation efflux protein [IPRO02524] (1); Cation efflux protein transmembrane domain [IPRO27469] (1)                                                                                                                             | -                               | -                            | P_trifoliata_00014_mRNA_129.1   |
| GF0043659 | 0                            | 0                         | 0                            | 1 Hypothetical protein (1)                                                  |                                                                                                                                                                                                                                                                                                                   |                                                                                                                                                                                                                               | -                               | -                            | P_trifoliata_00014_mRNA_124.1   |
| GF0043658 | 0                            | 0                         | 0                            | 1 Hypothetical protein (1)                                                  | integral component of membrane [GO:0016021 cellular_component] (1); transmembrane transporter activity [GO:0022857 molecular_function] (1)                                                                                                                                                                        | WAT1-related protein [IPRO30184] (1)                                                                                                                                                                                          | -                               | -                            | P_trifoliata_00014_mRNA_108.1   |
| GF0043657 | 0                            | 0                         | 0                            | 1 Hypothetical protein (1)                                                  |                                                                                                                                                                                                                                                                                                                   |                                                                                                                                                                                                                               | -                               | -                            | P_trifoliata_00013_mRNA_9.1     |
| GF0043656 | 0                            | 0                         | 0                            | 1 Hypothetical protein (1)                                                  |                                                                                                                                                                                                                                                                                                                   |                                                                                                                                                                                                                               | -                               | -                            | P_trifoliata_00013_mRNA_81.1    |
| GF0043655 | 0                            | 0                         | 0                            | 1 Hypothetical protein (1)                                                  | actin binding [GO:0003739 molecular_function] (1)                                                                                                                                                                                                                                                                 | Stomatal closure-related actin-binding protein, actin-binding domain [IPRO32012] (1)                                                                                                                                          | -                               | -                            | P_trifoliata_00013_mRNA_8.1     |
| GF0043654 | 0                            | 0                         | 0                            | 1 F-box and associated interaction domains-containing protein, putative (1) | protein binding [GO:0005515 molecular_function] (1)                                                                                                                                                                                                                                                               | F-box associated interaction domain [IPRO17451] (1); F-box domain [IPRO01810] (1); F-box associated domain, type 3 [IPRO13187] (1)                                                                                            | -                               | -                            | P_trifoliata_00013_mRNA_64.1    |



| ID        | Num. in <i>C. clementiae</i> | Num. in <i>C. canthii</i> | Num. in <i>P. trifoliata</i> | Note                                                                                           | GO                                                                                                                                                                                                                                                                                                                | InterPro                                                                                                                                                                                                                                                                                                                                                                                                                                                                              | Members in <i>C. clementiae</i> | Members in <i>C. canthii</i> | Members in <i>P. trifoliata</i> |                               |
|-----------|------------------------------|---------------------------|------------------------------|------------------------------------------------------------------------------------------------|-------------------------------------------------------------------------------------------------------------------------------------------------------------------------------------------------------------------------------------------------------------------------------------------------------------------|---------------------------------------------------------------------------------------------------------------------------------------------------------------------------------------------------------------------------------------------------------------------------------------------------------------------------------------------------------------------------------------------------------------------------------------------------------------------------------------|---------------------------------|------------------------------|---------------------------------|-------------------------------|
| GF0043653 | 0                            | 0                         | 1                            | Receptor-like protein kinase FERONIA (1)                                                       | ATP binding [GO:0005524 molecular_function] (1); protein kinase activity [GO:0004672 molecular_function] (1); protein phosphorylation [GO:0006468 biological_process] (1)                                                                                                                                         | Serine-threonine/tyrosine-protein kinase catalytic domain [IPR001245] (1); Serine-threonine-protein kinase, active site [IPR008271] (1); Protein kinase, ATP binding site [IPR017441] (1); Serine-threonine/dual-specificity protein kinase, catalytic domain [IPR002290] (1); Protein kinase-like domain [IPR01009] (1); Concavalin A-like lectin glucanase domain [IPR013320] (1); Malectin-like carbohydrate-binding domain [IPR024788] (1); Protein kinase domain [IPR000719] (1) | -                               | -                            | P_trifoliata_00013_mRNA_60.1    |                               |
| GF0043652 | 0                            | 0                         | 1                            | Hypothetical protein (1)                                                                       |                                                                                                                                                                                                                                                                                                                   |                                                                                                                                                                                                                                                                                                                                                                                                                                                                                       |                                 |                              |                                 | P_trifoliata_00013_mRNA_55.1  |
| GF0043651 | 0                            | 0                         | 1                            | Hypothetical protein (1)                                                                       |                                                                                                                                                                                                                                                                                                                   |                                                                                                                                                                                                                                                                                                                                                                                                                                                                                       |                                 |                              |                                 | P_trifoliata_00013_mRNA_53.1  |
| GF0043650 | 0                            | 0                         | 1                            | Hypothetical protein (1)                                                                       |                                                                                                                                                                                                                                                                                                                   |                                                                                                                                                                                                                                                                                                                                                                                                                                                                                       |                                 |                              |                                 | P_trifoliata_00013_mRNA_48.1  |
| GF0043649 | 0                            | 0                         | 1                            | Putative cytochrome P450-dependent fatty acid hydroxylase (1)                                  | iron ion binding [GO:0005506 molecular_function] (1); heme binding [GO:0020037 molecular_function] (1); oxidation-reduction process [GO:005114 biological_process] (1); oxidoreductase activity, acting on paired donors, with incorporation or reduction of molecular oxygen [GO:0016705 molecular_function] (1) | Cytochrome P450 [IPR01128] (1); Cytochrome P450, conserved site [IPR017972] (1)                                                                                                                                                                                                                                                                                                                                                                                                       | -                               | -                            | P_trifoliata_00013_mRNA_31.1    |                               |
| GF0043648 | 0                            | 0                         | 1                            | Cytochrome P450 94A1 (1)                                                                       | oxidation-reduction process [GO:005114 biological_process] (1); oxidoreductase activity, acting on paired donors, with incorporation or reduction of molecular oxygen [GO:0016705 molecular_function] (1); iron ion binding [GO:0005506 molecular_function] (1); heme binding [GO:0020037 molecular_function] (1) | Cytochrome P450, conserved site [IPR017972] (1); Cytochrome P450, E-class, group I [IPR002401] (1); Cytochrome P450 [IPR001128] (1)                                                                                                                                                                                                                                                                                                                                                   | -                               | -                            | P_trifoliata_00013_mRNA_30.1    |                               |
| GF0043647 | 0                            | 0                         | 1                            | Cytochrome P450 94A1 (1)                                                                       | oxidoreductase activity, acting on paired donors, with incorporation or reduction of molecular oxygen [GO:0016705 molecular_function] (1); oxidation-reduction process [GO:005114 biological_process] (1); iron ion binding [GO:0005506 molecular_function] (1); heme binding [GO:0020037 molecular_function] (1) | Cytochrome P450 [IPR001128] (1); Cytochrome P450, E-class, group I [IPR002401] (1); Cytochrome P450, conserved site [IPR017972] (1)                                                                                                                                                                                                                                                                                                                                                   | -                               | -                            | P_trifoliata_00013_mRNA_29.1    |                               |
| GF0043646 | 0                            | 0                         | 1                            | Hypothetical protein (1)                                                                       |                                                                                                                                                                                                                                                                                                                   |                                                                                                                                                                                                                                                                                                                                                                                                                                                                                       |                                 |                              |                                 | P_trifoliata_00013_mRNA_2.1   |
| GF0043645 | 0                            | 0                         | 1                            | S-adenosyl-L-methionine-dependent 1 methyltransferases superfamily protein, putative (1)       | methyltransferase activity [GO:0008168 molecular_function] (1)                                                                                                                                                                                                                                                    | SAM dependent methyltransferase [IPR025299] (1); S-adenosyl-L-methionine-dependent methyltransferase [IPR029063] (1)                                                                                                                                                                                                                                                                                                                                                                  | -                               | -                            | P_trifoliata_00013_mRNA_19.1    |                               |
| GF0043644 | 0                            | 0                         | 1                            | Plasitropic drug resistance protein 1 (1)                                                      | membrane [GO:0016020 cellular_component] (1); ATPase activity [GO:0016887 molecular_function] (1); ATP binding [GO:0005524 molecular_function] (1)                                                                                                                                                                | Plant PDR ABC transporter associated [IPR013581] (1); AAA+ ATPase domain [IPR003593] (1); ABC transporter-like [IPR003439] (1); ABC-2 type transporter [IPR013525] (1); ABC transporter extracellular N-terminal domain [IPR029481] (1); P-loop containing nucleoside triphosphate hydrolase [IPR027417] (1)                                                                                                                                                                          | -                               | -                            | P_trifoliata_00013_mRNA_160.1   |                               |
| GF0043643 | 0                            | 0                         | 1                            | AP2/B3 transcription factor family protein (1)                                                 | DNA binding [GO:0003677 molecular_function] (1)                                                                                                                                                                                                                                                                   | DNA-binding pseudobarrel domain [IPR015300] (1); B3 DNA binding domain [IPR003340] (1)                                                                                                                                                                                                                                                                                                                                                                                                | -                               | -                            | P_trifoliata_00013_mRNA_13.1    |                               |
| GF0043642 | 0                            | 0                         | 1                            | Hypothetical protein (1)                                                                       | protein ubiquitination [GO:0016567 biological_process] (1); ubiquitin-protein transferase activity [GO:0004842 molecular_function] (1)                                                                                                                                                                            | Zinc finger, RINGFYVE/PHD-type [IPR013083] (1); IRR domain [IPR002867] (1); Zinc finger, RING-type, conserved site [IPR017907] (1); E3 ubiquitin ligase RBR family [IPR01127] (1)                                                                                                                                                                                                                                                                                                     | -                               | -                            | P_trifoliata_00013_mRNA_12.1    |                               |
| GF0043641 | 0                            | 0                         | 1                            | Hypothetical protein (1)                                                                       |                                                                                                                                                                                                                                                                                                                   | NADP-dependent oxidoreductase domain [IPR023210] (1)                                                                                                                                                                                                                                                                                                                                                                                                                                  | -                               | -                            | P_trifoliata_00012_mRNA_99.1    |                               |
| GF0043640 | 0                            | 0                         | 1                            | Hypothetical protein (1)                                                                       | protein kinase activity [GO:0004672 molecular_function] (1); protein phosphorylation [GO:0006468 biological_process] (1); ATP binding [GO:0005524 molecular_function] (1)                                                                                                                                         | Protein kinase, ATP binding site [IPR017441] (1); Serine-threonine-protein kinase, active site [IPR008271] (1); Serine-threonine/dual-specificity protein kinase, catalytic domain [IPR002290] (1); Serine-threonine/tyrosine-protein kinase catalytic domain [IPR001245] (1); Protein kinase domain [IPR00719] (1); Protein kinase-like domain [IPR01009] (1); Concavalin A-like lectin/glucanase domain [IPR013320] (1)                                                             | -                               | -                            | P_trifoliata_00012_mRNA_94.1    |                               |
| GF0043639 | 0                            | 0                         | 1                            | Hypothetical protein (1)                                                                       |                                                                                                                                                                                                                                                                                                                   |                                                                                                                                                                                                                                                                                                                                                                                                                                                                                       |                                 |                              |                                 | P_trifoliata_00012_mRNA_78.1  |
| GF0043638 | 0                            | 0                         | 1                            | Putative invertase inhibitor (1)                                                               | enzyme inhibitor activity [GO:0004857 molecular_function] (1)                                                                                                                                                                                                                                                     | Pectinesterase inhibitor domain [IPR006501] (1)                                                                                                                                                                                                                                                                                                                                                                                                                                       | -                               | -                            | P_trifoliata_00012_mRNA_73.1    |                               |
| GF0043637 | 0                            | 0                         | 1                            | Hypothetical protein (1)                                                                       |                                                                                                                                                                                                                                                                                                                   |                                                                                                                                                                                                                                                                                                                                                                                                                                                                                       |                                 |                              |                                 | P_trifoliata_00012_mRNA_61.1  |
| GF0043636 | 0                            | 0                         | 1                            | Hypothetical protein (1)                                                                       |                                                                                                                                                                                                                                                                                                                   |                                                                                                                                                                                                                                                                                                                                                                                                                                                                                       |                                 |                              |                                 | P_trifoliata_00012_mRNA_60.1  |
| GF0043635 | 0                            | 0                         | 1                            | DNA-directed RNA polymerase II 8.2 kDa polypeptide (1)                                         | zinc ion binding [GO:0008270 molecular_function] (1); transcription, DNA-templated [GO:0006351 biological_process] (1); DNA binding [GO:0003677 molecular_function] (1); DNA-directed RNA polymerase activity [GO:0003899 molecular_function] (1)                                                                 | RNA polymerase subunit RPB10 [IPR023580] (1); DNA-directed RNA polymerase, subunit NRpb10 [IPR006268] (1); RNA polymerases, subunit N, zinc binding site [IPR020789] (1); Conserved hypothetical protein CIP01589, plant [IPR006476] (1); Homeodomain-like [IPR009057] (1)                                                                                                                                                                                                            | -                               | -                            | P_trifoliata_00012_mRNA_57.1    |                               |
| GF0043634 | 0                            | 0                         | 1                            | Polygalacturonase (1)                                                                          | polygalacturonase activity [GO:0004650 molecular_function] (1); carbohydrate metabolic process [GO:0005975 biological_process] (1)                                                                                                                                                                                | Glycoside hydrolase, family 28 [IPR000745] (1); Pectin lyase fold/violence factor [IPR011050] (1); Pectin lyase fold [IPR012334] (1)                                                                                                                                                                                                                                                                                                                                                  | -                               | -                            | P_trifoliata_00012_mRNA_53.1    |                               |
| GF0043633 | 0                            | 0                         | 1                            | Hypothetical protein (1)                                                                       |                                                                                                                                                                                                                                                                                                                   |                                                                                                                                                                                                                                                                                                                                                                                                                                                                                       |                                 |                              |                                 | P_trifoliata_00012_mRNA_3.1   |
| GF0043632 | 0                            | 0                         | 1                            | Hypothetical protein (1)                                                                       |                                                                                                                                                                                                                                                                                                                   |                                                                                                                                                                                                                                                                                                                                                                                                                                                                                       |                                 |                              |                                 | P_trifoliata_00012_mRNA_16.1  |
| GF0043631 | 0                            | 0                         | 1                            | Hypothetical protein (1)                                                                       |                                                                                                                                                                                                                                                                                                                   |                                                                                                                                                                                                                                                                                                                                                                                                                                                                                       |                                 |                              |                                 | P_trifoliata_00012_mRNA_157.1 |
| GF0043630 | 0                            | 0                         | 1                            | Hypothetical protein (1)                                                                       |                                                                                                                                                                                                                                                                                                                   | Uncharacterized domain Wx2, C-terminal [IPR021940] (1)                                                                                                                                                                                                                                                                                                                                                                                                                                | -                               | -                            | P_trifoliata_00012_mRNA_155.1   |                               |
| GF0043629 | 0                            | 0                         | 1                            | Hypothetical protein (1)                                                                       |                                                                                                                                                                                                                                                                                                                   |                                                                                                                                                                                                                                                                                                                                                                                                                                                                                       |                                 |                              |                                 | P_trifoliata_00012_mRNA_154.1 |
| GF0043628 | 0                            | 0                         | 1                            | Hypothetical protein (1)                                                                       |                                                                                                                                                                                                                                                                                                                   |                                                                                                                                                                                                                                                                                                                                                                                                                                                                                       |                                 |                              |                                 | P_trifoliata_00012_mRNA_151.1 |
| GF0043627 | 0                            | 0                         | 1                            | Hypothetical protein (1)                                                                       |                                                                                                                                                                                                                                                                                                                   |                                                                                                                                                                                                                                                                                                                                                                                                                                                                                       |                                 |                              |                                 | P_trifoliata_00012_mRNA_150.1 |
| GF0043626 | 0                            | 0                         | 1                            | Hypothetical protein (1)                                                                       |                                                                                                                                                                                                                                                                                                                   |                                                                                                                                                                                                                                                                                                                                                                                                                                                                                       |                                 |                              |                                 | P_trifoliata_00012_mRNA_144.1 |
| GF0043625 | 0                            | 0                         | 1                            | Hypothetical protein (1)                                                                       |                                                                                                                                                                                                                                                                                                                   |                                                                                                                                                                                                                                                                                                                                                                                                                                                                                       |                                 |                              |                                 | P_trifoliata_00012_mRNA_143.1 |
| GF0043624 | 0                            | 0                         | 1                            | Hypothetical protein (1)                                                                       |                                                                                                                                                                                                                                                                                                                   |                                                                                                                                                                                                                                                                                                                                                                                                                                                                                       |                                 |                              |                                 | P_trifoliata_00012_mRNA_138.1 |
| GF0043623 | 0                            | 0                         | 1                            | Hypothetical protein (1)                                                                       |                                                                                                                                                                                                                                                                                                                   | Sieve element occlusion, N-terminal [IPR027942] (1)                                                                                                                                                                                                                                                                                                                                                                                                                                   | -                               | -                            | P_trifoliata_00012_mRNA_137.1   |                               |
| GF0043622 | 0                            | 0                         | 1                            | Pedicle, carpel, stamen, petal 1 differentiation and expansion stage, group 2-like protein (1) |                                                                                                                                                                                                                                                                                                                   | Late embryogenesis abundant protein, LEA-14 [IPR004864] (1)                                                                                                                                                                                                                                                                                                                                                                                                                           | -                               | -                            | P_trifoliata_00012_mRNA_125.1   |                               |
| GF0043621 | 0                            | 0                         | 1                            | Hypothetical protein (1)                                                                       |                                                                                                                                                                                                                                                                                                                   |                                                                                                                                                                                                                                                                                                                                                                                                                                                                                       |                                 |                              |                                 | P_trifoliata_00012_mRNA_10.1  |
| GF0043620 | 0                            | 0                         | 1                            | Fatty acyl-CoA reductase 1 (1)                                                                 | fatty acyl-CoA reductase (alcohol-forming) activity [GO:0008019 molecular_function] (1)                                                                                                                                                                                                                           | Fatty acyl-CoA reductase [IPR026055] (1); Male sterility, NAD-binding [IPR013120] (1); NAD(P)-binding domain [IPR016040] (1)                                                                                                                                                                                                                                                                                                                                                          | -                               | -                            | P_trifoliata_00012_mRNA_1.1     |                               |
| GF0043619 | 0                            | 0                         | 1                            | Hypothetical protein (1)                                                                       |                                                                                                                                                                                                                                                                                                                   |                                                                                                                                                                                                                                                                                                                                                                                                                                                                                       |                                 |                              |                                 | P_trifoliata_00011_mRNA_87.1  |
| GF0043618 | 0                            | 0                         | 1                            | Hypothetical protein (1)                                                                       | RNA polymerization [GO:0006361 biological_process] (1); polyadenosine diphosphatase activity [GO:0004652 molecular_function] (1); nucleic acid [GO:0005624 cellular_component] (1)                                                                                                                                | Poly(A) polymerase [IPR014492] (1)                                                                                                                                                                                                                                                                                                                                                                                                                                                    | -                               | -                            | P_trifoliata_00011_mRNA_8.1     |                               |
| GF0043617 | 0                            | 0                         | 1                            | Hypothetical protein (1)                                                                       |                                                                                                                                                                                                                                                                                                                   |                                                                                                                                                                                                                                                                                                                                                                                                                                                                                       |                                 |                              |                                 | P_trifoliata_00011_mRNA_77.1  |
| GF0043616 | 0                            | 0                         | 1                            | Hydroxyproline-rich glycoprotein family 1 protein, putative (1)                                |                                                                                                                                                                                                                                                                                                                   |                                                                                                                                                                                                                                                                                                                                                                                                                                                                                       |                                 |                              |                                 | P_trifoliata_00011_mRNA_75.1  |
| GF0043615 | 0                            | 0                         | 1                            | Hypothetical protein (1)                                                                       |                                                                                                                                                                                                                                                                                                                   |                                                                                                                                                                                                                                                                                                                                                                                                                                                                                       |                                 |                              |                                 | P_trifoliata_00011_mRNA_44.1  |
| GF0043614 | 0                            | 0                         | 1                            | Glycosyl hydrolase family protein (1)                                                          | carbohydrate metabolic process [GO:0005975 biological_process] (1); hydrolase activity, hydrolyzing O-glycosyl compounds [GO:0004553 molecular_function] (1)                                                                                                                                                      | Glycoside hydrolase, family 3, N-terminal [IPR001764] (1); Glycoside hydrolase family 3 C-terminal domain [IPR002772] (1); Glycoside hydrolase family 3 [IPR026892] (1); Glycoside hydrolase superfamily [IPR017853] (1)                                                                                                                                                                                                                                                              | -                               | -                            | P_trifoliata_00011_mRNA_25.1    |                               |
| GF0043613 | 0                            | 0                         | 1                            | Hypothetical protein (1)                                                                       |                                                                                                                                                                                                                                                                                                                   |                                                                                                                                                                                                                                                                                                                                                                                                                                                                                       |                                 |                              |                                 | P_trifoliata_00011_mRNA_23.1  |
| GF0043612 | 0                            | 0                         | 1                            | Putative RING zinc finger domain superfamily protein (1)                                       | protein binding [GO:0005515 molecular_function] (1); zinc ion binding [GO:0008270 molecular_function] (1)                                                                                                                                                                                                         | Zinc finger, RINGFYVE/PHD-type [IPR013083] (1); Zinc finger, RING-type [IPR001841] (1)                                                                                                                                                                                                                                                                                                                                                                                                | -                               | -                            | P_trifoliata_00011_mRNA_17.1    |                               |
| GF0043611 | 0                            | 0                         | 1                            | Auxin-induced protein 15A (1)                                                                  | response to auxin [GO:0009733 biological_process] (1)                                                                                                                                                                                                                                                             | Small auxin-up RNA [IPR003676] (1)                                                                                                                                                                                                                                                                                                                                                                                                                                                    | -                               | -                            | P_trifoliata_00011_mRNA_160.1   |                               |
| GF0043610 | 0                            | 0                         | 1                            | 4,5-DOPA dioxygenase estradiol (1)                                                             | cellular aromatic compound metabolic process [GO:0006725 biological_process] (1); oxidoreductase activity [GO:0016491 molecular_function] (1); ferrous iron binding [GO:0008198 molecular_function] (1)                                                                                                           | Extradiol ring-cleavage dioxygenase, class III enzyme, subunit B [IPR004183] (1)                                                                                                                                                                                                                                                                                                                                                                                                      | -                               | -                            | P_trifoliata_00011_mRNA_144.1   |                               |

| ID        | Num. in <i>C. clementiae</i> | Num. in <i>C. canthii</i> | Num. in <i>P. trifoliata</i> | Note                                                         | GO                                                                                                                                                                                                                                                                                                                                                                                                                                            | InterPro                                                                                                                                                                                                                                                                                                               | Members in <i>C. clementiae</i> | Members in <i>C. canthii</i> | Members in <i>P. trifoliata</i> |
|-----------|------------------------------|---------------------------|------------------------------|--------------------------------------------------------------|-----------------------------------------------------------------------------------------------------------------------------------------------------------------------------------------------------------------------------------------------------------------------------------------------------------------------------------------------------------------------------------------------------------------------------------------------|------------------------------------------------------------------------------------------------------------------------------------------------------------------------------------------------------------------------------------------------------------------------------------------------------------------------|---------------------------------|------------------------------|---------------------------------|
| GF0043609 | 0                            | 0                         | 1                            | 140S ribosomal protein S6 (1)                                | ribosome [GO:0005840]<br>cellular_component (1); structural constituent of ribosome [GO:0003735]<br>molecular_function (1); intracellular [GO:0005622]<br>cellular_component (1); translation [GO:0006412]<br>biological_process (1)                                                                                                                                                                                                          | Ribosomal protein S6e, conserved site [IPRO18282] (1); Ribosomal protein S6e [IPRO1377] (1)                                                                                                                                                                                                                            | -                               | -                            | P_trifoliata_00011_mRNA_117.1   |
| GF0043608 | 0                            | 0                         | 1                            | Hypothetical protein (1)                                     | nucleotidyltransferase activity [GO:0016779]<br>molecular_function (1); RNA 3'-end processing [GO:0031123]<br>biological_process (1); RNA binding [GO:0003723]<br>molecular_function (1); nucleus [GO:0005634]<br>cellular_component (1); polynucleotide adenylyltransferase activity [GO:0004652]<br>molecular_function (1); RNA polymerization [GO:0004361]<br>biological_process (1)                                                       | Poly(A) polymerase [IPRO14492] (1); Nucleotidyltransferase, class I, C-terminal-like [IPRO11068] (1); Poly(A) polymerase, central domain [IPRO07012] (1); Poly(A) polymerase, RNA-binding domain [IPRO07010] (1)                                                                                                       | -                               | -                            | P_trifoliata_00011_mRNA_11.1    |
| GF0043607 | 0                            | 0                         | 1                            | Hypothetical protein (1)                                     |                                                                                                                                                                                                                                                                                                                                                                                                                                               | Endonuclease/exonuclease/phosphatase [IPRO05135] (1)                                                                                                                                                                                                                                                                   | -                               | -                            | P_trifoliata_00010_mRNA_88.1    |
| GF0043606 | 0                            | 0                         | 1                            | Hypothetical protein (1)                                     |                                                                                                                                                                                                                                                                                                                                                                                                                                               |                                                                                                                                                                                                                                                                                                                        | -                               | -                            | P_trifoliata_00010_mRNA_8.1     |
| GF0043605 | 0                            | 0                         | 1                            | Hypothetical protein (1)                                     | integral component of membrane [GO:0016021]<br>cellular_component (1)                                                                                                                                                                                                                                                                                                                                                                         | Mpv17/PMP22 [IPRO07248] (1)                                                                                                                                                                                                                                                                                            | -                               | -                            | P_trifoliata_00010_mRNA_77.1    |
| GF0043604 | 0                            | 0                         | 1                            | Hypothetical protein (1)                                     |                                                                                                                                                                                                                                                                                                                                                                                                                                               | Stigma-specific protein Stig1 [IPRO06969] (1); Autoallergen [IPRO18082] (1); Pectin lyase fold/virulence factor [IPRO11050] (1); Pectin lyase fold [IPRO12334] (1)                                                                                                                                                     | -                               | -                            | P_trifoliata_00010_mRNA_70.1    |
| GF0043603 | 0                            | 0                         | 1                            | Hypothetical protein (1)                                     |                                                                                                                                                                                                                                                                                                                                                                                                                                               |                                                                                                                                                                                                                                                                                                                        | -                               | -                            | P_trifoliata_00010_mRNA_65.1    |
| GF0043602 | 0                            | 0                         | 1                            | Hypothetical protein (1)                                     |                                                                                                                                                                                                                                                                                                                                                                                                                                               |                                                                                                                                                                                                                                                                                                                        | -                               | -                            | P_trifoliata_00010_mRNA_64.1    |
| GF0043601 | 0                            | 0                         | 1                            | Hypothetical protein (1)                                     |                                                                                                                                                                                                                                                                                                                                                                                                                                               |                                                                                                                                                                                                                                                                                                                        | -                               | -                            | P_trifoliata_00010_mRNA_62.1    |
| GF0043600 | 0                            | 0                         | 1                            | Hypothetical protein (1)                                     |                                                                                                                                                                                                                                                                                                                                                                                                                                               |                                                                                                                                                                                                                                                                                                                        | -                               | -                            | P_trifoliata_00010_mRNA_44.1    |
| GF0043599 | 0                            | 0                         | 1                            | Hypothetical protein (1)                                     | phosphatidylinositol phosphorylation [GO:0046854]<br>biological_process (1); binding [GO:0005488]<br>molecular_function (1)                                                                                                                                                                                                                                                                                                                   | Armadillo-type fold [IPRO16024] (1); Inositol monophosphatase, metal-binding site [IPRO25823] (1); Mo25-like [IPRO13878] (1); Inositol monophosphatase [IPRO00760] (1); Inositol monophosphatase, conserved site [IPRO0559] (1); Armadillo-like helical [IPRO11989] (1)                                                | -                               | -                            | P_trifoliata_00010_mRNA_4.1     |
| GF0043598 | 0                            | 0                         | 1                            | Hypothetical protein (1)                                     |                                                                                                                                                                                                                                                                                                                                                                                                                                               |                                                                                                                                                                                                                                                                                                                        | -                               | -                            | P_trifoliata_00010_mRNA_36.1    |
| GF0043597 | 0                            | 0                         | 1                            | Hypothetical protein (1)                                     | lipid binding [GO:0008289]<br>molecular_function (1); lipid transport [GO:0006869]<br>biological_process (1)                                                                                                                                                                                                                                                                                                                                  | Plant lipid transfer protein Par allergen [IPRO0523] (1); Bilirubin(ol)inhibitor/plant lipid transfer protein/seed storage helical domain [IPRO16140] (1)                                                                                                                                                              | -                               | -                            | P_trifoliata_00010_mRNA_35.1    |
| GF0043596 | 0                            | 0                         | 1                            | Hypothetical protein (1)                                     | protein serine/threonine kinase activity [GO:0004674]<br>molecular_function (1); protein kinase activity [GO:0004672]<br>molecular_function (1); protein phosphorylation [GO:0006468]<br>biological_process (1); ATP binding [GO:0005524]<br>molecular_function (1)                                                                                                                                                                           | Protein kinase domain [IPRO00719] (1); Protein kinase-like domain [IPRO11009] (1); Serine/threonine-protein kinase HT1, plant [IPRO15753] (1); Serine/threonine/tyrosine-protein kinase catalytic domain [IPRO01245] (1)                                                                                               | -                               | -                            | P_trifoliata_00010_mRNA_30.1    |
| GF0043595 | 0                            | 0                         | 1                            | Putative 26S protease regulatory subunit 6A-like protein (1) |                                                                                                                                                                                                                                                                                                                                                                                                                                               | P-loop containing nucleoside triphosphate hydrolase [IPRO27417] (1)                                                                                                                                                                                                                                                    | -                               | -                            | P_trifoliata_00010_mRNA_2.1     |
| GF0043594 | 0                            | 0                         | 1                            | Hypothetical protein (1)                                     |                                                                                                                                                                                                                                                                                                                                                                                                                                               |                                                                                                                                                                                                                                                                                                                        | -                               | -                            | P_trifoliata_00010_mRNA_163.1   |
| GF0043593 | 0                            | 0                         | 1                            | Hypothetical protein (1)                                     |                                                                                                                                                                                                                                                                                                                                                                                                                                               |                                                                                                                                                                                                                                                                                                                        | -                               | -                            | P_trifoliata_00010_mRNA_162.1   |
| GF0043592 | 0                            | 0                         | 1                            | Hypothetical protein (1)                                     |                                                                                                                                                                                                                                                                                                                                                                                                                                               |                                                                                                                                                                                                                                                                                                                        | -                               | -                            | P_trifoliata_00010_mRNA_154.1   |
| GF0043591 | 0                            | 0                         | 1                            | Hypothetical protein (1)                                     |                                                                                                                                                                                                                                                                                                                                                                                                                                               | Transposase, MuDr, plant [IPRO04332] (1)                                                                                                                                                                                                                                                                               | -                               | -                            | P_trifoliata_00010_mRNA_150.1   |
| GF0043590 | 0                            | 0                         | 1                            | Hypothetical protein (1)                                     |                                                                                                                                                                                                                                                                                                                                                                                                                                               |                                                                                                                                                                                                                                                                                                                        | -                               | -                            | P_trifoliata_00010_mRNA_149.1   |
| GF0043589 | 0                            | 0                         | 1                            | Hypothetical protein (1)                                     |                                                                                                                                                                                                                                                                                                                                                                                                                                               |                                                                                                                                                                                                                                                                                                                        | -                               | -                            | P_trifoliata_00010_mRNA_146.1   |
| GF0043588 | 0                            | 0                         | 1                            | Hypothetical protein (1)                                     |                                                                                                                                                                                                                                                                                                                                                                                                                                               |                                                                                                                                                                                                                                                                                                                        | -                               | -                            | P_trifoliata_00010_mRNA_133.1   |
| GF0043587 | 0                            | 0                         | 1                            | Hypothetical protein (1)                                     |                                                                                                                                                                                                                                                                                                                                                                                                                                               |                                                                                                                                                                                                                                                                                                                        | -                               | -                            | P_trifoliata_00010_mRNA_127.1   |
| GF0043586 | 0                            | 0                         | 1                            | Hypothetical protein (1)                                     |                                                                                                                                                                                                                                                                                                                                                                                                                                               |                                                                                                                                                                                                                                                                                                                        | -                               | -                            | P_trifoliata_00010_mRNA_125.1   |
| GF0043585 | 0                            | 0                         | 1                            | Hypothetical protein (1)                                     | protein dimerization activity [GO:0046983]<br>molecular_function (1); nucleic acid binding [GO:0003676]<br>molecular_function (1)                                                                                                                                                                                                                                                                                                             | Ribonuclease H-like domain [IPRO12337] (1); HAT, C-terminal dimerization domain [IPRO08906] (1)                                                                                                                                                                                                                        | -                               | -                            | P_trifoliata_00010_mRNA_122.1   |
| GF0043584 | 0                            | 0                         | 1                            | Hypothetical protein (1)                                     |                                                                                                                                                                                                                                                                                                                                                                                                                                               |                                                                                                                                                                                                                                                                                                                        | -                               | -                            | P_trifoliata_00010_mRNA_121.1   |
| GF0043583 | 0                            | 0                         | 1                            | Hypothetical protein (1)                                     |                                                                                                                                                                                                                                                                                                                                                                                                                                               |                                                                                                                                                                                                                                                                                                                        | -                               | -                            | P_trifoliata_00010_mRNA_113.1   |
| GF0043582 | 0                            | 0                         | 1                            | Hypothetical protein (1)                                     |                                                                                                                                                                                                                                                                                                                                                                                                                                               |                                                                                                                                                                                                                                                                                                                        | -                               | -                            | P_trifoliata_00010_mRNA_11.1    |
| GF0043581 | 0                            | 0                         | 1                            | Hypothetical protein (1)                                     | catalytic activity [GO:0003824]<br>molecular_function (1); oxidoreductase activity [GO:0016491]<br>molecular_function (1)                                                                                                                                                                                                                                                                                                                     | Aldolase-type TIM barrel [IPRO13785] (1); FMN-dependent dehydrogenase [IPRO06262] (1)                                                                                                                                                                                                                                  | -                               | -                            | P_trifoliata_00010_mRNA_108.1   |
| GF0043580 | 0                            | 0                         | 1                            | Hypothetical protein (1)                                     |                                                                                                                                                                                                                                                                                                                                                                                                                                               |                                                                                                                                                                                                                                                                                                                        | -                               | -                            | P_trifoliata_00010_mRNA_100.1   |
| GF0043579 | 0                            | 0                         | 1                            | Hypothetical protein (1)                                     |                                                                                                                                                                                                                                                                                                                                                                                                                                               |                                                                                                                                                                                                                                                                                                                        | -                               | -                            | P_trifoliata_00010_mRNA_1.1     |
| GF0043578 | 0                            | 0                         | 1                            | Hypothetical protein (1)                                     | protein dimerization activity [GO:0046983]<br>molecular_function (1)                                                                                                                                                                                                                                                                                                                                                                          | NmaA-like domain [IPRO08030] (1); Winged helix/nimble domain DNA-binding domain [IPRO11991] (1); Plant methyltransferase dimerization [IPRO12967] (1); NAD(P)-binding domain [IPRO16040] (1)                                                                                                                           | -                               | -                            | P_trifoliata_00009_mRNA_98.1    |
| GF0043577 | 0                            | 0                         | 1                            | Hypothetical protein (1)                                     |                                                                                                                                                                                                                                                                                                                                                                                                                                               |                                                                                                                                                                                                                                                                                                                        | -                               | -                            | P_trifoliata_00009_mRNA_95.1    |
| GF0043576 | 0                            | 0                         | 1                            | Hypothetical protein (1)                                     | zinc ion binding [GO:0008270]<br>molecular_function (1); oxidation-reduction process [GO:005514]<br>biological_process (1); oxidoreductase activity [GO:0016491]<br>molecular_function (1)                                                                                                                                                                                                                                                    | GroE5-like [IPRO11032] (1); Alcohol dehydrogenase superfamily, zinc-type [IPRO02085] (1); Alcohol dehydrogenase, N-terminal [IPRO13154] (1); Alcohol dehydrogenase, zinc-type, conserved site [IPRO02328] (1); Alcohol dehydrogenase, C-terminal [IPRO13149] (1); NAD(P)-binding domain [IPRO16040] (1)                | -                               | -                            | P_trifoliata_00009_mRNA_85.1    |
| GF0043575 | 0                            | 0                         | 1                            | Hypothetical protein (1)                                     |                                                                                                                                                                                                                                                                                                                                                                                                                                               |                                                                                                                                                                                                                                                                                                                        | -                               | -                            | P_trifoliata_00009_mRNA_83.1    |
| GF0043574 | 0                            | 0                         | 1                            | Hypothetical protein (1)                                     |                                                                                                                                                                                                                                                                                                                                                                                                                                               |                                                                                                                                                                                                                                                                                                                        | -                               | -                            | P_trifoliata_00009_mRNA_74.1    |
| GF0043573 | 0                            | 0                         | 1                            | Hypothetical protein (1)                                     |                                                                                                                                                                                                                                                                                                                                                                                                                                               |                                                                                                                                                                                                                                                                                                                        | -                               | -                            | P_trifoliata_00009_mRNA_66.1    |
| GF0043572 | 0                            | 0                         | 1                            | Hypothetical protein (1)                                     |                                                                                                                                                                                                                                                                                                                                                                                                                                               |                                                                                                                                                                                                                                                                                                                        | -                               | -                            | P_trifoliata_00009_mRNA_56.1    |
| GF0043571 | 0                            | 0                         | 1                            | Hypothetical protein (1)                                     |                                                                                                                                                                                                                                                                                                                                                                                                                                               |                                                                                                                                                                                                                                                                                                                        | -                               | -                            | P_trifoliata_00009_mRNA_28.1    |
| GF0043570 | 0                            | 0                         | 1                            | Sexiquinone synthase (1)                                     | metabolic process [GO:0008152]<br>biological_process (1); terpene synthase activity [GO:0010323]<br>molecular_function (1); lyase activity [GO:0016829]<br>molecular_function (1); magnesium ion binding [GO:0000287]<br>molecular_function (1)                                                                                                                                                                                               | Terpene synthase, N-terminal domain [IPRO1906] (1); Terpene synthase, metal-binding domain [IPRO05630] (1); Terpenoid cyclase/protein prenyltransferase alpha-alpha toroid [IPRO08939] (1); Isoprenoid synthase domain [IPRO06949] (1)                                                                                 | -                               | -                            | P_trifoliata_00009_mRNA_24.1    |
| GF0043569 | 0                            | 0                         | 1                            | Hypothetical protein (1)                                     |                                                                                                                                                                                                                                                                                                                                                                                                                                               |                                                                                                                                                                                                                                                                                                                        | -                               | -                            | P_trifoliata_00009_mRNA_22.1    |
| GF0043568 | 0                            | 0                         | 1                            | Hypothetical protein (1)                                     |                                                                                                                                                                                                                                                                                                                                                                                                                                               |                                                                                                                                                                                                                                                                                                                        | -                               | -                            | P_trifoliata_00009_mRNA_170.1   |
| GF0043567 | 0                            | 0                         | 1                            | Ribonucleoside-diphosphate reductase large subunit (1)       | DNA replication [GO:0006260]<br>biological_process (1); ATP binding [GO:0005524]<br>molecular_function (1); oxidation-reduction process [GO:005514]<br>biological_process (1); ribonucleoside-diphosphate reductase activity, thioredoxin disulfide as acceptor [GO:0004748]<br>molecular_function (1)                                                                                                                                        | Ribonucleoside reductase large subunit, C-terminal [IPRO00788] (1); Ribonucleoside reductase large subunit, N-terminal [IPRO13509] (1); Ribonucleoside reductase, class 1, alpha subunit [IPRO13346] (1); Ribonucleoside reductase R1 subunit, N-terminal [IPRO08926] (1); ATP-cone domain [IPRO05144] (1)             | -                               | -                            | P_trifoliata_00009_mRNA_17.1    |
| GF0043566 | 0                            | 0                         | 1                            | Hypothetical protein (1)                                     |                                                                                                                                                                                                                                                                                                                                                                                                                                               |                                                                                                                                                                                                                                                                                                                        | -                               | -                            | P_trifoliata_00009_mRNA_163.1   |
| GF0043565 | 0                            | 0                         | 1                            | Basic 7S globulin (1)                                        | aspartic-type endopeptidase activity [GO:0004190]<br>molecular_function (1); RNA-DNA hybrid ribonuclease activity [GO:0004523]<br>molecular_function (1); proteolysis [GO:0006508]<br>biological_process (1); nucleic acid binding [GO:0003676]<br>molecular_function (1)                                                                                                                                                                     | Peptidase family A1 domain [IPRO33121] (1); Aspartic peptidase domain [IPRO21099] (1); Ribonuclease H domain [IPRO02156] (1); Xylanase inhibitor, N-terminal [IPRO32611] (1); Xylanase inhibitor, C-terminal [IPRO32799] (1); Aspartic peptidase A1 family [IPRO01461] (1); Ribonuclease H-like domain [IPRO12337] (1) | -                               | -                            | P_trifoliata_00009_mRNA_145.1   |
| GF0043564 | 0                            | 0                         | 1                            | Basic 7S globulin, putative (1)                              | proteolysis [GO:0006508]<br>biological_process (1); aspartic-type endopeptidase activity [GO:0004190]<br>molecular_function (1)                                                                                                                                                                                                                                                                                                               | Aspartic peptidase domain [IPRO21099] (1); Xylanase inhibitor, C-terminal [IPRO32799] (1); Aspartic peptidase A1 family [IPRO01461] (1)                                                                                                                                                                                | -                               | -                            | P_trifoliata_00009_mRNA_141.1   |
| GF0043563 | 0                            | 0                         | 1                            | Hypothetical protein (1)                                     |                                                                                                                                                                                                                                                                                                                                                                                                                                               |                                                                                                                                                                                                                                                                                                                        | -                               | -                            | P_trifoliata_00009_mRNA_139.1   |
| GF0043562 | 0                            | 0                         | 1                            | Hypothetical protein (1)                                     | mRNA guanylyltransferase activity [GO:0004484]<br>molecular_function (1); 7-methylguanosine mRNA capping [GO:0006370]<br>biological_process (1); mRNA processing [GO:0006397]<br>biological_process (1); translation [GO:0006412]<br>biological_process (1); intracellular [GO:0005622]<br>cellular_component (1); structural constituent of ribosome [GO:0003735]<br>molecular_function (1); ribosome [GO:0005840]<br>cellular_component (1) | mRNA capping enzyme, catalytic domain [IPRO01339] (1)                                                                                                                                                                                                                                                                  | -                               | -                            | P_trifoliata_00009_mRNA_137.1   |
| GF0043561 | 0                            | 0                         | 1                            | Hypothetical protein (1)                                     |                                                                                                                                                                                                                                                                                                                                                                                                                                               | Ribosomal protein S24e [IPRO01976] (1)                                                                                                                                                                                                                                                                                 | -                               | -                            | P_trifoliata_00009_mRNA_115.1   |
| GF0043560 | 0                            | 0                         | 1                            | Hypothetical protein (1)                                     | hydrolase activity [GO:0016787]<br>molecular_function (1); calcium ion binding [GO:0005509]<br>molecular_function (1)                                                                                                                                                                                                                                                                                                                         | EF-Hand 1, calcium-binding site [IPRO18247] (1); EF-hand domain [IPRO02048] (1); EF-hand domain pair [IPRO11992] (1); Alpha/Beta hydrolase fold [IPRO29058] (1); Deneclatone hydrolase [IPRO02925] (1)                                                                                                                 | -                               | -                            | P_trifoliata_00009_mRNA_113.1   |

| ID        | Num. in <i>C. clementiae</i> | Num. in <i>C. canihii</i> | Num. in <i>P. trifoliata</i> | Note                                                  | GO                                                                                                                                                                                                                                                                                                                                                                                                                                    | InterPro                                                                                                                                                                                                                                              | Members in <i>C. clementiae</i> | Members in <i>C. canihii</i> | Members in <i>P. trifoliata</i> |
|-----------|------------------------------|---------------------------|------------------------------|-------------------------------------------------------|---------------------------------------------------------------------------------------------------------------------------------------------------------------------------------------------------------------------------------------------------------------------------------------------------------------------------------------------------------------------------------------------------------------------------------------|-------------------------------------------------------------------------------------------------------------------------------------------------------------------------------------------------------------------------------------------------------|---------------------------------|------------------------------|---------------------------------|
| GF0043559 | 0                            | 0                         | 0                            | 1 Hypothetical protein (1)                            |                                                                                                                                                                                                                                                                                                                                                                                                                                       | Alpha/Beta hydrolase fold [IPR029058] (1)                                                                                                                                                                                                             | -                               | -                            | P_trifoliata_00009_mRNA_101.1   |
| GF0043558 | 0                            | 0                         | 0                            | 1 Hypothetical protein (1)                            |                                                                                                                                                                                                                                                                                                                                                                                                                                       | Alpha/Beta hydrolase fold [IPR029058] (1)                                                                                                                                                                                                             | -                               | -                            | P_trifoliata_00009_mRNA_100.1   |
| GF0043557 | 0                            | 0                         | 0                            | 1 UDP-galactose transporter 2 (1)                     | nucleotide-sugar transmembrane transporter activity [GO:0005318 molecular_function] (1); nucleotide-sugar transport [GO:0015780 biological_process] (1)                                                                                                                                                                                                                                                                               | Bi-functional UDP-4-aminopyridine-5-carboxylate transporter [IPR031089] (1); Sugar phosphate transporter domain [IPR048453] (1)                                                                                                                       | -                               | -                            | P_trifoliata_00009_mRNA_1.1     |
| GF0043556 | 0                            | 0                         | 0                            | 1 DNA (cytosine-5)-methyltransferase (1)              | methyltransferase activity [GO:0008168 molecular_function] (1)                                                                                                                                                                                                                                                                                                                                                                        | C-5 cytosine methyltransferase [IPR001525] (1); S-adenosyl-L-methionine-dependent methyltransferase [IPR029063] (1)                                                                                                                                   | -                               | -                            | P_trifoliata_00008_mRNA_92.1    |
| GF0043555 | 0                            | 0                         | 0                            | 1 Crooked-neck-like protein 1 (1)                     | protein binding [GO:0005515 molecular_function] (1); RNA processing [GO:0006396 biological_process] (1)                                                                                                                                                                                                                                                                                                                               | HAT (Half-A-TPR) repeat [IPR003107] (1); Tetrapeptide-like helical domain [IPR011990] (1)                                                                                                                                                             | -                               | -                            | P_trifoliata_00008_mRNA_83.1    |
| GF0043554 | 0                            | 0                         | 0                            | 1 Auxin-responsive protein IAA20 (1)                  | nucleus [GO:0005624 cellular_component] (1); protein binding [GO:0005515 molecular_function] (1); regulation of transcription, DNA-dependent [GO:0006355 biological_process] (1)                                                                                                                                                                                                                                                      | AUX/IAA protein [IPR003311] (1); FBI domain [IPR000270] (1)                                                                                                                                                                                           | -                               | -                            | P_trifoliata_00008_mRNA_55.1    |
| GF0043553 | 0                            | 0                         | 0                            | 1 Hypothetical protein (1)                            |                                                                                                                                                                                                                                                                                                                                                                                                                                       |                                                                                                                                                                                                                                                       | -                               | -                            | P_trifoliata_00008_mRNA_4.1     |
| GF0043552 | 0                            | 0                         | 0                            | 1 Glucuronidase 3 isoform 2 (1)                       | membrane [GO:0016020 cellular_component] (1); hydrolase activity, acting on glycosyl bonds [GO:0016798 molecular_function] (1)                                                                                                                                                                                                                                                                                                        | Glycoside hydrolase, family 79 [IPR005199] (1); Glycoside hydrolase superfamily [IPR017853] (1)                                                                                                                                                       | -                               | -                            | P_trifoliata_00008_mRNA_35.1    |
| GF0043551 | 0                            | 0                         | 0                            | 1 Nodulin family protein (1)                          |                                                                                                                                                                                                                                                                                                                                                                                                                                       | Flotillin family [IPR027705] (1)                                                                                                                                                                                                                      | -                               | -                            | P_trifoliata_00008_mRNA_29.1    |
| GF0043550 | 0                            | 0                         | 0                            | 1 Hyp O-arabinylosyltransferase homolog (1)           |                                                                                                                                                                                                                                                                                                                                                                                                                                       |                                                                                                                                                                                                                                                       | -                               | -                            | P_trifoliata_00008_mRNA_17.1    |
| GF0043549 | 0                            | 0                         | 0                            | 1 Hypothetical protein (1)                            |                                                                                                                                                                                                                                                                                                                                                                                                                                       |                                                                                                                                                                                                                                                       | -                               | -                            | P_trifoliata_00008_mRNA_167.1   |
| GF0043548 | 0                            | 0                         | 0                            | 1 Hypothetical protein (1)                            |                                                                                                                                                                                                                                                                                                                                                                                                                                       |                                                                                                                                                                                                                                                       | -                               | -                            | P_trifoliata_00008_mRNA_166.1   |
| GF0043547 | 0                            | 0                         | 0                            | 1 Hypothetical protein (1)                            |                                                                                                                                                                                                                                                                                                                                                                                                                                       |                                                                                                                                                                                                                                                       | -                               | -                            | P_trifoliata_00008_mRNA_165.1   |
| GF0043546 | 0                            | 0                         | 0                            | 1 TSA- Wollemia nobilis transcribed RNA sequence (1)  |                                                                                                                                                                                                                                                                                                                                                                                                                                       | Frigida-like [IPR012474] (1)                                                                                                                                                                                                                          | -                               | -                            | P_trifoliata_00008_mRNA_164.1   |
| GF0043545 | 0                            | 0                         | 0                            | 1 Hypothetical protein (1)                            |                                                                                                                                                                                                                                                                                                                                                                                                                                       |                                                                                                                                                                                                                                                       | -                               | -                            | P_trifoliata_00008_mRNA_163.1   |
| GF0043544 | 0                            | 0                         | 0                            | 1 Putative serine/threonine-protein kinase WNK1 (1)   | ATP binding [GO:0005524 molecular_function] (1); protein kinase activity [GO:0004672 molecular_function] (1); protein phosphorylation [GO:0006468 biological_process] (1)                                                                                                                                                                                                                                                             | Protein kinase-like domain [IPR011009] (1); Protein kinase domain [IPR000719] (1)                                                                                                                                                                     | -                               | -                            | P_trifoliata_00008_mRNA_162.1   |
| GF0043543 | 0                            | 0                         | 0                            | 1 Hypothetical protein (1)                            |                                                                                                                                                                                                                                                                                                                                                                                                                                       |                                                                                                                                                                                                                                                       | -                               | -                            | P_trifoliata_00008_mRNA_157.1   |
| GF0043542 | 0                            | 0                         | 0                            | 1 Hypothetical protein (1)                            |                                                                                                                                                                                                                                                                                                                                                                                                                                       |                                                                                                                                                                                                                                                       | -                               | -                            | P_trifoliata_00008_mRNA_147.1   |
| GF0043541 | 0                            | 0                         | 0                            | 1 Hypothetical protein (1)                            |                                                                                                                                                                                                                                                                                                                                                                                                                                       |                                                                                                                                                                                                                                                       | -                               | -                            | P_trifoliata_00008_mRNA_144.1   |
| GF0043540 | 0                            | 0                         | 0                            | 1 Hypothetical protein (1)                            |                                                                                                                                                                                                                                                                                                                                                                                                                                       | Leucine-rich repeat domain, L domain-like [IPR032675] (1)                                                                                                                                                                                             | -                               | -                            | P_trifoliata_00008_mRNA_143.1   |
| GF0043539 | 0                            | 0                         | 0                            | 1 Hypothetical protein (1)                            |                                                                                                                                                                                                                                                                                                                                                                                                                                       | SOUL haem-binding protein [IPR006917] (1); Regulatory factor, effector binding domain [IPR011256] (1)                                                                                                                                                 | -                               | -                            | P_trifoliata_00008_mRNA_139.1   |
| GF0043538 | 0                            | 0                         | 0                            | 1 Hypothetical protein (1)                            |                                                                                                                                                                                                                                                                                                                                                                                                                                       |                                                                                                                                                                                                                                                       | -                               | -                            | P_trifoliata_00008_mRNA_136.1   |
| GF0043537 | 0                            | 0                         | 0                            | 1 Hypothetical protein (1)                            |                                                                                                                                                                                                                                                                                                                                                                                                                                       |                                                                                                                                                                                                                                                       | -                               | -                            | P_trifoliata_00008_mRNA_135.1   |
| GF0043536 | 0                            | 0                         | 0                            | 1 Hypothetical protein (1)                            |                                                                                                                                                                                                                                                                                                                                                                                                                                       |                                                                                                                                                                                                                                                       | -                               | -                            | P_trifoliata_00008_mRNA_128.1   |
| GF0043535 | 0                            | 0                         | 0                            | 1 Hypothetical protein (1)                            |                                                                                                                                                                                                                                                                                                                                                                                                                                       |                                                                                                                                                                                                                                                       | -                               | -                            | P_trifoliata_00008_mRNA_126.1   |
| GF0043534 | 0                            | 0                         | 0                            | 1 Hypothetical protein (1)                            |                                                                                                                                                                                                                                                                                                                                                                                                                                       |                                                                                                                                                                                                                                                       | -                               | -                            | P_trifoliata_00008_mRNA_119.1   |
| GF0043533 | 0                            | 0                         | 0                            | 1 Hypothetical protein (1)                            | lyase activity [GO:0016829 molecular_function] (1); terpene synthase activity [GO:0010333 molecular_function] (1); metabolic process [GO:0008152 biological_process] (1)                                                                                                                                                                                                                                                              | Terpenoid cyclases/protein prenyltransferase-alpha-alpha toxioid [IPR008930] (1); Terpene synthase, N-terminal domain [IPR001906] (1)                                                                                                                 | -                               | -                            | P_trifoliata_00008_mRNA_116.1   |
| GF0043532 | 0                            | 0                         | 0                            | 1 Hypothetical protein (1)                            |                                                                                                                                                                                                                                                                                                                                                                                                                                       |                                                                                                                                                                                                                                                       | -                               | -                            | P_trifoliata_00008_mRNA_113.1   |
| GF0043531 | 0                            | 0                         | 0                            | 1 Hypothetical protein (1)                            | lyase activity [GO:0016829 molecular_function] (1); terpene synthase activity [GO:0010333 molecular_function] (1); metabolic process [GO:0008152 biological_process] (1)                                                                                                                                                                                                                                                              | Terpenoid cyclases/protein prenyltransferase-alpha-alpha toxioid [IPR008930] (1); Terpene synthase, N-terminal domain [IPR001906] (1)                                                                                                                 | -                               | -                            | P_trifoliata_00008_mRNA_111.1   |
| GF0043530 | 0                            | 0                         | 0                            | 1 Hypothetical protein (1)                            |                                                                                                                                                                                                                                                                                                                                                                                                                                       | Transposon, En/Spm-like [IPR004242] (1)                                                                                                                                                                                                               | -                               | -                            | P_trifoliata_00008_mRNA_108.1   |
| GF0043529 | 0                            | 0                         | 0                            | 1 FcO (1)                                             | oxidation-reduction process [GO:005114 biological_process] (1); oxidoreductase activity [GO:0016491 molecular_function] (1)                                                                                                                                                                                                                                                                                                           | FAD(NAD(P))-binding domain [IPR023753] (1)                                                                                                                                                                                                            | -                               | -                            | P_trifoliata_00008_mRNA_106.1   |
| GF0043528 | 0                            | 0                         | 0                            | 1 Hypothetical protein (1)                            |                                                                                                                                                                                                                                                                                                                                                                                                                                       |                                                                                                                                                                                                                                                       | -                               | -                            | P_trifoliata_00008_mRNA_1.1     |
| GF0043527 | 0                            | 0                         | 0                            | 1 Hypothetical protein (1)                            |                                                                                                                                                                                                                                                                                                                                                                                                                                       |                                                                                                                                                                                                                                                       | -                               | -                            | P_trifoliata_00007_mRNA_91.1    |
| GF0043526 | 0                            | 0                         | 0                            | 1 Hypothetical protein (1)                            |                                                                                                                                                                                                                                                                                                                                                                                                                                       | Chromo domain-like [IPR016197] (1); Chromo domain [IPR023780] (1)                                                                                                                                                                                     | -                               | -                            | P_trifoliata_00007_mRNA_8.1     |
| GF0043525 | 0                            | 0                         | 0                            | 1 JmjC domain containing protein, expressed (1)       |                                                                                                                                                                                                                                                                                                                                                                                                                                       | JmjC domain [IPR003349] (1); JmjC domain [IPR003347] (1)                                                                                                                                                                                              | -                               | -                            | P_trifoliata_00007_mRNA_76.1    |
| GF0043524 | 0                            | 0                         | 0                            | 1 Hypothetical protein (1)                            |                                                                                                                                                                                                                                                                                                                                                                                                                                       |                                                                                                                                                                                                                                                       | -                               | -                            | P_trifoliata_00007_mRNA_74.1    |
| GF0043523 | 0                            | 0                         | 0                            | 1 Hypothetical protein (1)                            | zinc ion binding [GO:0008270 molecular_function] (1); nucleic acid binding [GO:0003676 molecular_function] (1)                                                                                                                                                                                                                                                                                                                        | Zinc finger, PMZ-type [IPR006564] (1); Zinc finger, SWIM-type [IPR007527] (1); Zinc finger, CCHC-type [IPR001878] (1)                                                                                                                                 | -                               | -                            | P_trifoliata_00007_mRNA_71.1    |
| GF0043522 | 0                            | 0                         | 0                            | 1 Cytokinin dehydrogenase 3 (1)                       | cytokinin dehydrogenase activity [GO:0019139 molecular_function] (1); catalytic activity [GO:0003624 molecular_function] (1); cytokinin metabolic process [GO:0009690 biological_process] (1); oxidoreductase activity, acting on CH-OH group of donors [GO:0001664 molecular_function] (1); flavin adenine dinucleotide binding [GO:00050660 molecular_function] (1); oxidation-reduction process [GO:005514 biological_process] (1) | Vanillyl-alcohol oxidase/Cytokinin dehydrogenase C-terminal domain [IPR016170] (1); FAD-binding, type-2 [IPR016166] (1); Cytokinin dehydrogenase 1, FAD/cytokinin binding domain [IPR013545] (1); FAD-linked oxidase-like, C-terminal [IPR016164] (1) | -                               | -                            | P_trifoliata_00007_mRNA_7.1     |
| GF0043521 | 0                            | 0                         | 0                            | 1 Hypothetical protein (1)                            |                                                                                                                                                                                                                                                                                                                                                                                                                                       |                                                                                                                                                                                                                                                       | -                               | -                            | P_trifoliata_00007_mRNA_51.1    |
| GF0043520 | 0                            | 0                         | 0                            | 1 Hypothetical protein (1)                            | proteolysis [GO:0006508 biological_process] (1); cysteine-type peptidase activity [GO:0008234 molecular_function] (1)                                                                                                                                                                                                                                                                                                                 | Ulp1 protease family, C-terminal catalytic domain [IPR003653] (1)                                                                                                                                                                                     | -                               | -                            | P_trifoliata_00007_mRNA_5.1     |
| GF0043519 | 0                            | 0                         | 0                            | 1 Hypothetical protein (1)                            | nucleosidyltransferase activity [GO:0016779 molecular_function] (1)                                                                                                                                                                                                                                                                                                                                                                   | Polymerase, nucleotidyltransferase domain [IPR002934] (1)                                                                                                                                                                                             | -                               | -                            | P_trifoliata_00007_mRNA_42.1    |
| GF0043518 | 0                            | 0                         | 0                            | 1 Hypothetical protein (1)                            |                                                                                                                                                                                                                                                                                                                                                                                                                                       |                                                                                                                                                                                                                                                       | -                               | -                            | P_trifoliata_00007_mRNA_41.1    |
| GF0043517 | 0                            | 0                         | 0                            | 1 Disease resistance RPS2-like protein (1)            |                                                                                                                                                                                                                                                                                                                                                                                                                                       | Leucine-rich repeat domain, L domain-like [IPR032675] (1)                                                                                                                                                                                             | -                               | -                            | P_trifoliata_00007_mRNA_40.1    |
| GF0043516 | 0                            | 0                         | 0                            | 1 Hypothetical protein (1)                            |                                                                                                                                                                                                                                                                                                                                                                                                                                       |                                                                                                                                                                                                                                                       | -                               | -                            | P_trifoliata_00007_mRNA_4.1     |
| GF0043515 | 0                            | 0                         | 0                            | 1 Hypothetical protein (1)                            | zinc ion binding [GO:0008270 molecular_function] (1); nucleic acid binding [GO:0003676 molecular_function] (1)                                                                                                                                                                                                                                                                                                                        | Zinc knuckle CX3C4HX4C [IPR025383] (1); Zinc finger, CCHC-type [IPR001878] (1); Domain of unknown function DUF4283 [IPR025558] (1)                                                                                                                    | -                               | -                            | P_trifoliata_00007_mRNA_39.1    |
| GF0043514 | 0                            | 0                         | 0                            | 1 Disease resistance protein (1)                      |                                                                                                                                                                                                                                                                                                                                                                                                                                       | Leucine-rich repeat domain, L domain-like [IPR032675] (1)                                                                                                                                                                                             | -                               | -                            | P_trifoliata_00007_mRNA_36.1    |
| GF0043513 | 0                            | 0                         | 0                            | 1 Hypothetical protein (1)                            |                                                                                                                                                                                                                                                                                                                                                                                                                                       |                                                                                                                                                                                                                                                       | -                               | -                            | P_trifoliata_00007_mRNA_34.1    |
| GF0043512 | 0                            | 0                         | 0                            | 1 Hypothetical protein (1)                            |                                                                                                                                                                                                                                                                                                                                                                                                                                       |                                                                                                                                                                                                                                                       | -                               | -                            | P_trifoliata_00007_mRNA_32.1    |
| GF0043511 | 0                            | 0                         | 0                            | 1 Retrotransposon protein, putative, unclassified (1) |                                                                                                                                                                                                                                                                                                                                                                                                                                       | Reverse transcriptase domain [IPR009477] (1)                                                                                                                                                                                                          | -                               | -                            | P_trifoliata_00007_mRNA_3.1     |
| GF0043510 | 0                            | 0                         | 0                            | 1 Hypothetical protein (1)                            |                                                                                                                                                                                                                                                                                                                                                                                                                                       |                                                                                                                                                                                                                                                       | -                               | -                            | P_trifoliata_00007_mRNA_25.1    |
| GF0043509 | 0                            | 0                         | 0                            | 1 Hypothetical protein (1)                            | endonuclease/exonuclease/phosphatase [GO:0005135 molecular_function] (1)                                                                                                                                                                                                                                                                                                                                                              | Endonuclease/exonuclease/phosphatase [IPR005135] (1)                                                                                                                                                                                                  | -                               | -                            | P_trifoliata_00007_mRNA_2.1     |
| GF0043508 | 0                            | 0                         | 0                            | 1 Hypothetical protein (1)                            |                                                                                                                                                                                                                                                                                                                                                                                                                                       |                                                                                                                                                                                                                                                       | -                               | -                            | P_trifoliata_00007_mRNA_19.1    |
| GF0043507 | 0                            | 0                         | 0                            | 1 Hypothetical protein (1)                            |                                                                                                                                                                                                                                                                                                                                                                                                                                       |                                                                                                                                                                                                                                                       | -                               | -                            | P_trifoliata_00007_mRNA_18.1    |
| GF0043506 | 0                            | 0                         | 0                            | 1 Condensin complex subunit 3 (1)                     |                                                                                                                                                                                                                                                                                                                                                                                                                                       |                                                                                                                                                                                                                                                       | -                               | -                            | P_trifoliata_00007_mRNA_17.1    |
| GF0043505 | 0                            | 0                         | 0                            | 1 Hypothetical protein (1)                            |                                                                                                                                                                                                                                                                                                                                                                                                                                       |                                                                                                                                                                                                                                                       | -                               | -                            | P_trifoliata_00007_mRNA_156.1   |
| GF0043504 | 0                            | 0                         | 0                            | 1 Hypothetical protein (1)                            |                                                                                                                                                                                                                                                                                                                                                                                                                                       |                                                                                                                                                                                                                                                       | -                               | -                            | P_trifoliata_00007_mRNA_155.1   |
| GF0043503 | 0                            | 0                         | 0                            | 1 Hypothetical protein (1)                            |                                                                                                                                                                                                                                                                                                                                                                                                                                       |                                                                                                                                                                                                                                                       | -                               | -                            | P_trifoliata_00007_mRNA_152.1   |
| GF0043502 | 0                            | 0                         | 0                            | 1 Hypothetical protein (1)                            |                                                                                                                                                                                                                                                                                                                                                                                                                                       |                                                                                                                                                                                                                                                       | -                               | -                            | P_trifoliata_00007_mRNA_149.1   |
| GF0043501 | 0                            | 0                         | 0                            | 1 Hypothetical protein (1)                            |                                                                                                                                                                                                                                                                                                                                                                                                                                       |                                                                                                                                                                                                                                                       | -                               | -                            | P_trifoliata_00007_mRNA_148.1   |
| GF0043500 | 0                            | 0                         | 0                            | 1 Hypothetical protein (1)                            |                                                                                                                                                                                                                                                                                                                                                                                                                                       |                                                                                                                                                                                                                                                       | -                               | -                            | P_trifoliata_00007_mRNA_145.1   |
| GF0043499 | 0                            | 0                         | 0                            | 1 Hypothetical protein (1)                            |                                                                                                                                                                                                                                                                                                                                                                                                                                       |                                                                                                                                                                                                                                                       | -                               | -                            | P_trifoliata_00007_mRNA_144.1   |
| GF0043498 | 0                            | 0                         | 0                            | 1 Hypothetical protein (1)                            |                                                                                                                                                                                                                                                                                                                                                                                                                                       |                                                                                                                                                                                                                                                       | -                               | -                            | P_trifoliata_00007_mRNA_143.1   |
| GF0043497 | 0                            | 0                         | 0                            | 1 Hypothetical protein (1)                            |                                                                                                                                                                                                                                                                                                                                                                                                                                       |                                                                                                                                                                                                                                                       | -                               | -                            | P_trifoliata_00007_mRNA_142.1   |
| GF0043496 | 0                            | 0                         | 0                            | 1 Hypothetical protein (1)                            |                                                                                                                                                                                                                                                                                                                                                                                                                                       |                                                                                                                                                                                                                                                       | -                               | -                            | P_trifoliata_00007_mRNA_139.1   |
| GF0043495 | 0                            | 0                         | 0                            | 1 Hypothetical protein (1)                            |                                                                                                                                                                                                                                                                                                                                                                                                                                       |                                                                                                                                                                                                                                                       | -                               | -                            | P_trifoliata_00007_mRNA_136.1   |
| GF0043494 | 0                            | 0                         | 0                            | 1 Hypothetical protein (1)                            |                                                                                                                                                                                                                                                                                                                                                                                                                                       |                                                                                                                                                                                                                                                       | -                               | -                            | P_trifoliata_00007_mRNA_134.1   |
| GF0043493 | 0                            | 0                         | 0                            | 1 Hypothetical protein (1)                            |                                                                                                                                                                                                                                                                                                                                                                                                                                       |                                                                                                                                                                                                                                                       | -                               | -                            | P_trifoliata_00007_mRNA_132.1   |

| ID       | Num. in <i>C. clementiae</i> | Num. in <i>C. canthii</i> | Num. in <i>P. trifoliate</i> | Note                                                              | GO                                                                                                                                                                                                                                                                                                                                                                                                                                                                                                                                                                                                                                                                                                         | InterPro                                                                                                                                                                                                                                                                                                                                                                                                   | Members in <i>C. clementiae</i> | Members in <i>C. canthii</i> | Members in <i>P. trifoliate</i> |
|----------|------------------------------|---------------------------|------------------------------|-------------------------------------------------------------------|------------------------------------------------------------------------------------------------------------------------------------------------------------------------------------------------------------------------------------------------------------------------------------------------------------------------------------------------------------------------------------------------------------------------------------------------------------------------------------------------------------------------------------------------------------------------------------------------------------------------------------------------------------------------------------------------------------|------------------------------------------------------------------------------------------------------------------------------------------------------------------------------------------------------------------------------------------------------------------------------------------------------------------------------------------------------------------------------------------------------------|---------------------------------|------------------------------|---------------------------------|
| GF004392 | 0                            | 0                         | 1                            | Hypothetical protein (1)                                          | 1-deoxy-D-xylulose 5-phosphate reductoisomerase activity [GO:0036604 molecular_function] (1); NADPH binding [GO:007002 molecular_function] (1); oxidation-reduction process [GO:005114 biological_process] (1); isoprenoid biosynthetic process [GO:0008299 biological_process] (1); metal ion binding [GO:0046872 molecular_function] (1); zinc ion binding [GO:0008270 molecular_function] (1); carbonate dehydratase activity [GO:0004089 molecular_function] (1); carbon utilization [GO:0015976 biological_process] (1)                                                                                                                                                                               | 1-deoxy-D-xylulose 5-phosphate reductoisomerase, N-terminal [IPR013512] (1); 1-deoxy-D-xylulose 5-phosphate reductoisomerase [IPR001821] (1); NAD(P) binding domain [IPR016040] (1); DXP reductoisomerase C-terminal domain [IPR026877] (1)                                                                                                                                                                | -                               | -                            | P_trifoliata_00007_mRNA_125.1   |
| GF004391 | 0                            | 0                         | 1                            | Carbonate dehydratase (1)                                         | protein binding [GO:0005515 molecular_function] (1); peroxisomal membrane [GO:0005778 cellular_component] (1); protein import into peroxisome matrix, docking [GO:0016560 biological_process] (1)                                                                                                                                                                                                                                                                                                                                                                                                                                                                                                          | Carbonic anhydrase, prokaryotic-like, conserved site [IPR015892] (1); Carbonic anhydrase [IPR001765] (1)                                                                                                                                                                                                                                                                                                   | -                               | -                            | P_trifoliata_00007_mRNA_122.1   |
| GF004390 | 0                            | 0                         | 1                            | Hypothetical protein (1)                                          | glycerol-3-phosphate metabolic process [GO:0066072 biological_process] (1); carbohydrate metabolic process [GO:0005975 biological_process] (1); oxidation-reduction process [GO:005114 biological_process] (1); oxidoreductase activity [GO:0016491 molecular_function] (1); oxidoreductase activity, acting on the CH-OH group of donors, NAD or NADP as acceptor [GO:0016016 molecular_function] (1); NAD binding [GO:0051287 molecular_function] (1); glycerol-3-phosphate dehydrogenase complex [GO:009331 cellular_component] (1); glycerol-3-phosphate catabolic process [GO:0046168 biological_process] (1); glycerol-3-phosphate dehydrogenase [NAD+] activity [GO:0004367 molecular_function] (1) | Peroxisome membrane anchor protein Pex14p, N-terminal [IPR006785] (1); Peroxisomal membrane protein 14 [IPR025655] (1)                                                                                                                                                                                                                                                                                     | -                               | -                            | P_trifoliata_00007_mRNA_121.1   |
| GF004389 | 0                            | 0                         | 1                            | Putative polygalacturonase non-catalytic subunit (1)              |                                                                                                                                                                                                                                                                                                                                                                                                                                                                                                                                                                                                                                                                                                            |                                                                                                                                                                                                                                                                                                                                                                                                            |                                 |                              | P_trifoliata_00007_mRNA_112.1   |
| GF004388 | 0                            | 0                         | 1                            | Hypothetical protein (1)                                          |                                                                                                                                                                                                                                                                                                                                                                                                                                                                                                                                                                                                                                                                                                            | Zinc knuckle CX2CX4HX4C [IPR025836] (1)                                                                                                                                                                                                                                                                                                                                                                    |                                 |                              | P_trifoliata_00007_mRNA_1.1     |
| GF004387 | 0                            | 0                         | 1                            | Hypothetical protein (1)                                          |                                                                                                                                                                                                                                                                                                                                                                                                                                                                                                                                                                                                                                                                                                            |                                                                                                                                                                                                                                                                                                                                                                                                            |                                 |                              | P_trifoliata_00006_mRNA_73.1    |
| GF004386 | 0                            | 0                         | 1                            | Hypothetical protein (1)                                          |                                                                                                                                                                                                                                                                                                                                                                                                                                                                                                                                                                                                                                                                                                            | Domain of unknown function DUF2828 [IPR034553] (1)                                                                                                                                                                                                                                                                                                                                                         |                                 |                              | P_trifoliata_00006_mRNA_67.1    |
| GF004385 | 0                            | 0                         | 1                            | Hypothetical protein (1)                                          |                                                                                                                                                                                                                                                                                                                                                                                                                                                                                                                                                                                                                                                                                                            |                                                                                                                                                                                                                                                                                                                                                                                                            |                                 |                              | P_trifoliata_00006_mRNA_61.1    |
| GF004384 | 0                            | 0                         | 1                            | Glycerol-3-phosphate dehydrogenase [NAD+] [GPDHC1, cytosolic] (1) | glycerol-3-phosphate metabolic process [GO:0066072 biological_process] (1); carbohydrate metabolic process [GO:0005975 biological_process] (1); oxidation-reduction process [GO:005114 biological_process] (1); oxidoreductase activity [GO:0016491 molecular_function] (1); oxidoreductase activity, acting on the CH-OH group of donors, NAD or NADP as acceptor [GO:0016016 molecular_function] (1); NAD binding [GO:0051287 molecular_function] (1); glycerol-3-phosphate dehydrogenase complex [GO:009331 cellular_component] (1); glycerol-3-phosphate catabolic process [GO:0046168 biological_process] (1); glycerol-3-phosphate dehydrogenase [NAD+] activity [GO:0004367 molecular_function] (1) | NAD(P)-binding domain [IPR016040] (1); Glycerol-3-phosphate dehydrogenase, NAD-dependent [IPR006168] (1); Glycerol-3-phosphate dehydrogenase, NAD-dependent, C-terminal [IPR006109] (1); Glycerol-3-phosphate dehydrogenase, NAD-dependent, N-terminal [IPR01128] (1); 6-phosphogluconate dehydrogenase, domain 2 [IPR013328] (1); 6-phosphogluconate dehydrogenase C-terminal domain-like [IPR008927] (1) | -                               | -                            | P_trifoliata_00006_mRNA_27.2    |
| GF004383 | 0                            | 0                         | 1                            | Hypothetical protein (1)                                          |                                                                                                                                                                                                                                                                                                                                                                                                                                                                                                                                                                                                                                                                                                            |                                                                                                                                                                                                                                                                                                                                                                                                            |                                 |                              | P_trifoliata_00006_mRNA_255.1   |
| GF004382 | 0                            | 0                         | 1                            | Hypothetical protein (1)                                          |                                                                                                                                                                                                                                                                                                                                                                                                                                                                                                                                                                                                                                                                                                            |                                                                                                                                                                                                                                                                                                                                                                                                            |                                 |                              | P_trifoliata_00006_mRNA_226.1   |
| GF004381 | 0                            | 0                         | 1                            | Hypothetical protein (1)                                          | nucleic acid binding [GO:0003676 molecular_function] (1); ATP binding [GO:0005524 molecular_function] (1)                                                                                                                                                                                                                                                                                                                                                                                                                                                                                                                                                                                                  | DEAD/DEAH box helicase domain [IPR011545] (1); P-loop containing nucleoside triphosphate hydrolase [IPR02741] (1); ATP-dependent RNA helicase DEAD-box, conserved site [IPR00629] (1)                                                                                                                                                                                                                      | -                               | -                            | P_trifoliata_00006_mRNA_203.1   |
| GF004380 | 0                            | 0                         | 1                            | Wax synthase isoform 1 (1)                                        |                                                                                                                                                                                                                                                                                                                                                                                                                                                                                                                                                                                                                                                                                                            | Wax synthase domain [IPR032805] (1)                                                                                                                                                                                                                                                                                                                                                                        |                                 |                              | P_trifoliata_00006_mRNA_20.1    |
| GF004379 | 0                            | 0                         | 1                            | Hypothetical protein (1)                                          |                                                                                                                                                                                                                                                                                                                                                                                                                                                                                                                                                                                                                                                                                                            | Uncharacterised protein family UPF0114 [IPR005134] (1)                                                                                                                                                                                                                                                                                                                                                     |                                 |                              | P_trifoliata_00006_mRNA_2.1     |
| GF004378 | 0                            | 0                         | 1                            | Hypothetical protein (1)                                          | regulation of transcription, DNA-templated [GO:0006355 biological_process] (1)                                                                                                                                                                                                                                                                                                                                                                                                                                                                                                                                                                                                                             | FHY3/FAR1 family [IPR031052] (1); MULE transposase domain [IPR018289] (1)                                                                                                                                                                                                                                                                                                                                  | -                               | -                            | P_trifoliata_00006_mRNA_187.1   |
| GF004377 | 0                            | 0                         | 1                            | Clavata3/ESR (CLE) gene family member MICLE24 (1)                 |                                                                                                                                                                                                                                                                                                                                                                                                                                                                                                                                                                                                                                                                                                            |                                                                                                                                                                                                                                                                                                                                                                                                            |                                 |                              | P_trifoliata_00006_mRNA_169.1   |
| GF004376 | 0                            | 0                         | 1                            | DUF679 domain membrane protein (1)                                |                                                                                                                                                                                                                                                                                                                                                                                                                                                                                                                                                                                                                                                                                                            | Protein of unknown function DUF679 [IPR007770] (1)                                                                                                                                                                                                                                                                                                                                                         |                                 |                              | P_trifoliata_00006_mRNA_162.1   |
| GF004375 | 0                            | 0                         | 1                            | Hypothetical protein (1)                                          | oxidoreductase activity, acting on CH-OH group of donors [GO:0016614 molecular_function] (1); oxidation-reduction process [GO:005114 biological_process] (1); oxidoreductase activity [GO:0016491 molecular_function] (1)                                                                                                                                                                                                                                                                                                                                                                                                                                                                                  | FAD/NAD(P)-binding domain [IPR023753] (1); Glucose-methanol-choline oxidoreductase, C-terminal [IPR007867] (1)                                                                                                                                                                                                                                                                                             | -                               | -                            | P_trifoliata_00006_mRNA_158.1   |
| GF004374 | 0                            | 0                         | 1                            | Glucose-methanol-choline (GMC) oxidoreductase family protein (1)  | oxidoreductase activity, acting on CH-OH group of donors [GO:0016614 molecular_function] (1)                                                                                                                                                                                                                                                                                                                                                                                                                                                                                                                                                                                                               | Glucose-methanol-choline oxidoreductase, N-terminal [IPR000172] (1); FAD/NAD(P)-binding domain [IPR023753] (1)                                                                                                                                                                                                                                                                                             | -                               | -                            | P_trifoliata_00006_mRNA_157.1   |
| GF004373 | 0                            | 0                         | 1                            | Hypothetical protein (1)                                          | potassium ion transmembrane transport [GO:0071805 biological_process] (1); membrane [GO:0001602 cellular_component] (1); potassium ion transmembrane transporter activity [GO:001079 molecular_function] (1)                                                                                                                                                                                                                                                                                                                                                                                                                                                                                               | Potassium transporter [IPR003855] (1)                                                                                                                                                                                                                                                                                                                                                                      | -                               | -                            | P_trifoliata_00006_mRNA_15.1    |
| GF004371 | 0                            | 0                         | 1                            | Serine carboxypeptidase (1)                                       | transferase activity, transferring glycosyl groups [GO:0016757 molecular_function] (1)                                                                                                                                                                                                                                                                                                                                                                                                                                                                                                                                                                                                                     | Glycosyltransferase AER61, uncharacterised [IPR007657] (1)                                                                                                                                                                                                                                                                                                                                                 | -                               | -                            | P_trifoliata_00006_mRNA_108.1   |
| GF004370 | 0                            | 0                         | 1                            | Hypothetical protein (1)                                          |                                                                                                                                                                                                                                                                                                                                                                                                                                                                                                                                                                                                                                                                                                            |                                                                                                                                                                                                                                                                                                                                                                                                            |                                 |                              | P_trifoliata_00006_mRNA_100.1   |
| GF004369 | 0                            | 0                         | 1                            | Hypothetical protein (1)                                          |                                                                                                                                                                                                                                                                                                                                                                                                                                                                                                                                                                                                                                                                                                            |                                                                                                                                                                                                                                                                                                                                                                                                            |                                 |                              | P_trifoliata_00005_mRNA_99.1    |
| GF004368 | 0                            | 0                         | 1                            | Hypothetical protein (1)                                          | regulation of transcription, DNA-templated [GO:0006355 biological_process] (1)                                                                                                                                                                                                                                                                                                                                                                                                                                                                                                                                                                                                                             | FHY3/FAR1 family [IPR031052] (1); FAR1 DNA binding domain [IPR004330] (1)                                                                                                                                                                                                                                                                                                                                  | -                               | -                            | P_trifoliata_00005_mRNA_97.1    |
| GF004367 | 0                            | 0                         | 1                            | Hypothetical protein (1)                                          |                                                                                                                                                                                                                                                                                                                                                                                                                                                                                                                                                                                                                                                                                                            |                                                                                                                                                                                                                                                                                                                                                                                                            |                                 |                              | P_trifoliata_00005_mRNA_93.1    |
| GF004366 | 0                            | 0                         | 1                            | Hypothetical protein (1)                                          |                                                                                                                                                                                                                                                                                                                                                                                                                                                                                                                                                                                                                                                                                                            |                                                                                                                                                                                                                                                                                                                                                                                                            |                                 |                              | P_trifoliata_00005_mRNA_90.1    |
| GF004365 | 0                            | 0                         | 1                            | Auxin-induced protein 10A5 (1)                                    | response to auxin [GO:0009733 biological_process] (1)                                                                                                                                                                                                                                                                                                                                                                                                                                                                                                                                                                                                                                                      | Small auxin- $\alpha$ RNA [IPR003676] (1)                                                                                                                                                                                                                                                                                                                                                                  | -                               | -                            | P_trifoliata_00005_mRNA_86.1    |
| GF004364 | 0                            | 0                         | 1                            | Hypothetical protein (1)                                          |                                                                                                                                                                                                                                                                                                                                                                                                                                                                                                                                                                                                                                                                                                            |                                                                                                                                                                                                                                                                                                                                                                                                            |                                 |                              | P_trifoliata_00005_mRNA_81.1    |
| GF004363 | 0                            | 0                         | 1                            | Hypothetical protein (1)                                          |                                                                                                                                                                                                                                                                                                                                                                                                                                                                                                                                                                                                                                                                                                            |                                                                                                                                                                                                                                                                                                                                                                                                            |                                 |                              | P_trifoliata_00005_mRNA_80.1    |
| GF004362 | 0                            | 0                         | 1                            | Hypothetical protein (1)                                          | oxidation-reduction process [GO:005114 biological_process] (1); oxidoreductase activity, acting on paired donors, with incorporation or reduction of molecular oxygen [GO:0016705 molecular_function] (1); iron ion binding [GO:0005506 molecular_function] (1); heme binding [GO:0020037 molecular_function] (1)                                                                                                                                                                                                                                                                                                                                                                                          | Cytochrome P450 [IPR001128] (1); Cytochrome P450, E-class, group I [IPR002401] (1)                                                                                                                                                                                                                                                                                                                         | -                               | -                            | P_trifoliata_00005_mRNA_78.1    |
| GF004361 | 0                            | 0                         | 1                            | Hypothetical protein (1)                                          | integral component of membrane [GO:0016021 cellular_component] (1)                                                                                                                                                                                                                                                                                                                                                                                                                                                                                                                                                                                                                                         | TRAM/LAG1/CLN8 homology domain [IPR006634] (1)                                                                                                                                                                                                                                                                                                                                                             | -                               | -                            | P_trifoliata_00005_mRNA_68.1    |
| GF004360 | 0                            | 0                         | 1                            | Hypothetical protein (1)                                          |                                                                                                                                                                                                                                                                                                                                                                                                                                                                                                                                                                                                                                                                                                            |                                                                                                                                                                                                                                                                                                                                                                                                            |                                 |                              | P_trifoliata_00005_mRNA_67.1    |
| GF004359 | 0                            | 0                         | 1                            | Hypothetical protein (1)                                          |                                                                                                                                                                                                                                                                                                                                                                                                                                                                                                                                                                                                                                                                                                            |                                                                                                                                                                                                                                                                                                                                                                                                            |                                 |                              | P_trifoliata_00005_mRNA_66.1    |
| GF004358 | 0                            | 0                         | 1                            | Hypothetical protein (1)                                          |                                                                                                                                                                                                                                                                                                                                                                                                                                                                                                                                                                                                                                                                                                            |                                                                                                                                                                                                                                                                                                                                                                                                            |                                 |                              | P_trifoliata_00005_mRNA_62.1    |
| GF004357 | 0                            | 0                         | 1                            | Hypothetical protein (1)                                          |                                                                                                                                                                                                                                                                                                                                                                                                                                                                                                                                                                                                                                                                                                            |                                                                                                                                                                                                                                                                                                                                                                                                            |                                 |                              | P_trifoliata_00005_mRNA_61.1    |
| GF004356 | 0                            | 0                         | 1                            | BAHD acyltransferase (1)                                          | transferase activity, transferring acyl groups other than amino-acyl groups [GO:0016747 molecular_function] (1)                                                                                                                                                                                                                                                                                                                                                                                                                                                                                                                                                                                            | Chloramphenicol acetyltransferase-like domain [IPR023213] (1); Transferase [IPR003480] (1)                                                                                                                                                                                                                                                                                                                 | -                               | -                            | P_trifoliata_00005_mRNA_59.1    |
| GF004355 | 0                            | 0                         | 1                            | Hypothetical protein (1)                                          | GTP biosynthetic process [GO:0006183 biological_process] (1); CTP biosynthetic process [GO:0006241 biological_process] (1); nucleoside diphosphate phosphorylation [GO:0006165 biological_process] (1); UTP biosynthetic process [GO:0006228 biological_process] (1); nucleoside diphosphate kinase activity [GO:0004550 molecular_function] (1)                                                                                                                                                                                                                                                                                                                                                           | Nucleoside diphosphate kinase [IPR001564] (1)                                                                                                                                                                                                                                                                                                                                                              | -                               | -                            | P_trifoliata_00005_mRNA_56.1    |
| GF004354 | 0                            | 0                         | 1                            | Hypothetical protein (1)                                          | iron ion binding [GO:0005506 molecular_function] (1); heme binding [GO:0020037 molecular_function] (1); oxidation-reduction process [GO:005114 biological_process] (1); oxidoreductase activity, acting on paired donors, with incorporation or reduction of molecular oxygen [GO:0016705 molecular_function] (1)                                                                                                                                                                                                                                                                                                                                                                                          | Cytochrome P450 [IPR001128] (1)                                                                                                                                                                                                                                                                                                                                                                            | -                               | -                            | P_trifoliata_00005_mRNA_55.1    |
| GF004353 | 0                            | 0                         | 1                            | Geraniol 10-hydroxylase-like protein (1)                          | oxidation-reduction process [GO:005114 biological_process] (1); oxidoreductase activity, acting on paired donors, with incorporation or reduction of molecular oxygen [GO:0016705 molecular_function] (1); iron ion binding [GO:0005506 molecular_function] (1); heme binding [GO:0020037 molecular_function] (1)                                                                                                                                                                                                                                                                                                                                                                                          | Cytochrome P450 [IPR001128] (1); Cytochrome P450, E-class, group I [IPR002401] (1)                                                                                                                                                                                                                                                                                                                         | -                               | -                            | P_trifoliata_00005_mRNA_54.1    |

| ID        | Num. in <i>C. clementiae</i> | Num. in <i>C. umbilo</i> | Num. in <i>P. trifoliata</i> | Note                                                     | GO                                                                                                                                                                                                                                                                                                                                                                                                                                                          | InterPro                                                                                                                                                                                                                                                                                                                                                                                    | Members in <i>C. clementiae</i> | Members in <i>C. umbilo</i> | Members in <i>P. trifoliata</i> |
|-----------|------------------------------|--------------------------|------------------------------|----------------------------------------------------------|-------------------------------------------------------------------------------------------------------------------------------------------------------------------------------------------------------------------------------------------------------------------------------------------------------------------------------------------------------------------------------------------------------------------------------------------------------------|---------------------------------------------------------------------------------------------------------------------------------------------------------------------------------------------------------------------------------------------------------------------------------------------------------------------------------------------------------------------------------------------|---------------------------------|-----------------------------|---------------------------------|
| GF004342  | 0                            | 0                        | 0                            | 1 Hypothetical protein (1)                               | nucleic acid binding [GO:0003676 molecular_function] (1); zinc ion binding [GO:0008270 molecular_function] (1)                                                                                                                                                                                                                                                                                                                                              | Zinc finger, CCHC-type [IPR001878] (1)                                                                                                                                                                                                                                                                                                                                                      | -                               | -                           | P_trifoliata_00005_mRNA_52.1    |
| GF004345  | 0                            | 0                        | 0                            | 1 Hypothetical protein (1)                               |                                                                                                                                                                                                                                                                                                                                                                                                                                                             | DNA-binding pseudobarrel domain [IPR015300] (1); B3 domain-containing protein [IPR005508] (1)                                                                                                                                                                                                                                                                                               | -                               | -                           | P_trifoliata_00005_mRNA_50.1    |
| GF0043450 | 0                            | 0                        | 0                            | 1 Hypothetical protein (1)                               |                                                                                                                                                                                                                                                                                                                                                                                                                                                             |                                                                                                                                                                                                                                                                                                                                                                                             | -                               | -                           | P_trifoliata_00005_mRNA_45.1    |
| GF0043449 | 0                            | 0                        | 0                            | 1 Hypothetical protein (1)                               |                                                                                                                                                                                                                                                                                                                                                                                                                                                             |                                                                                                                                                                                                                                                                                                                                                                                             | -                               | -                           | P_trifoliata_00005_mRNA_4.1     |
| GF0043448 | 0                            | 0                        | 0                            | 1 Hypothetical protein (1)                               |                                                                                                                                                                                                                                                                                                                                                                                                                                                             |                                                                                                                                                                                                                                                                                                                                                                                             | -                               | -                           | P_trifoliata_00005_mRNA_38.1    |
| GF0043447 | 0                            | 0                        | 0                            | 1 Hypothetical protein (1)                               |                                                                                                                                                                                                                                                                                                                                                                                                                                                             | Domain of unknown function DUF4283 [IPR025558] (1); Reverse transcriptase domain [IPR000477] (1)                                                                                                                                                                                                                                                                                            | -                               | -                           | P_trifoliata_00005_mRNA_34.1    |
| GF0043446 | 0                            | 0                        | 0                            | 1 Hypothetical protein (1)                               | carbohydrate binding [GO:0030246 molecular_function] (1)                                                                                                                                                                                                                                                                                                                                                                                                    | Legume lectin domain [IPR001220] (1); Concavallin A-like lectin/glucanase domain [IPR013320] (1)                                                                                                                                                                                                                                                                                            | -                               | -                           | P_trifoliata_00005_mRNA_33.1    |
| GF0043445 | 0                            | 0                        | 0                            | 1 Hypothetical protein (1)                               |                                                                                                                                                                                                                                                                                                                                                                                                                                                             |                                                                                                                                                                                                                                                                                                                                                                                             | -                               | -                           | P_trifoliata_00005_mRNA_31.1    |
| GF0043444 | 0                            | 0                        | 0                            | 1 Hypothetical protein (1)                               |                                                                                                                                                                                                                                                                                                                                                                                                                                                             | Domain of unknown function DUF4283 [IPR025558] (1)                                                                                                                                                                                                                                                                                                                                          | -                               | -                           | P_trifoliata_00005_mRNA_26.1    |
| GF0043443 | 0                            | 0                        | 0                            | 1 Hypothetical protein (1)                               |                                                                                                                                                                                                                                                                                                                                                                                                                                                             |                                                                                                                                                                                                                                                                                                                                                                                             | -                               | -                           | P_trifoliata_00005_mRNA_25.1    |
| GF0043442 | 0                            | 0                        | 0                            | 1 Hypothetical protein (1)                               | GTPase activator activity [GO:0005096 molecular_function] (1)                                                                                                                                                                                                                                                                                                                                                                                               | Arf GTPase activating protein [IPR01164] (1)                                                                                                                                                                                                                                                                                                                                                | -                               | -                           | P_trifoliata_00005_mRNA_22.1    |
| GF0043441 | 0                            | 0                        | 0                            | 1 Hypothetical protein (1)                               | protein binding [GO:0005515 molecular_function] (1)                                                                                                                                                                                                                                                                                                                                                                                                         | Pentatricopeptide repeat [IPR002885] (1); Tetratricopeptide-like helical domain [IPR011990] (1)                                                                                                                                                                                                                                                                                             | -                               | -                           | P_trifoliata_00005_mRNA_16.1    |
| GF0043440 | 0                            | 0                        | 0                            | 1 Hypothetical protein (1)                               |                                                                                                                                                                                                                                                                                                                                                                                                                                                             |                                                                                                                                                                                                                                                                                                                                                                                             | -                               | -                           | P_trifoliata_00005_mRNA_148.1   |
| GF0043439 | 0                            | 0                        | 0                            | 1 Hypothetical protein (1)                               |                                                                                                                                                                                                                                                                                                                                                                                                                                                             |                                                                                                                                                                                                                                                                                                                                                                                             | -                               | -                           | P_trifoliata_00005_mRNA_146.1   |
| GF0043438 | 0                            | 0                        | 0                            | 1 Hypothetical protein (1)                               |                                                                                                                                                                                                                                                                                                                                                                                                                                                             |                                                                                                                                                                                                                                                                                                                                                                                             | -                               | -                           | P_trifoliata_00005_mRNA_144.1   |
| GF0043437 | 0                            | 0                        | 0                            | 1 Hypothetical protein (1)                               |                                                                                                                                                                                                                                                                                                                                                                                                                                                             |                                                                                                                                                                                                                                                                                                                                                                                             | -                               | -                           | P_trifoliata_00005_mRNA_140.1   |
| GF0043436 | 0                            | 0                        | 0                            | 1 Agmatase-like MADS-box protein AGL61 (1)               | protein dimerization activity [GO:0046983 molecular_function] (1); DNA binding [GO:0000677 molecular_function] (1)                                                                                                                                                                                                                                                                                                                                          | Transcription factor, MADS-box [IPR002100] (1)                                                                                                                                                                                                                                                                                                                                              | -                               | -                           | P_trifoliata_00005_mRNA_14.1    |
| GF0043435 | 0                            | 0                        | 0                            | 1 Lectin receptor kinase (1)                             | protein phosphorylation [GO:0006688 biological_process] (1); protein kinase activity [GO:0004672 molecular_function] (1); carbohydrate binding [GO:0030246 molecular_function] (1); ATP binding [GO:0005524 molecular_function] (1)                                                                                                                                                                                                                         | Protein kinase domain [IPR000719] (1); Concavallin A-like lectin/glucanase domain [IPR013320] (1); Legume lectin domain [IPR001220] (1); Protein kinase-like domain [IPR011009] (1); Serine/threonine/tyrosine specificity protein kinase, catalytic domain [IPR002290] (1); Protein kinase, ATP binding site [IPR017441] (1); Serine/threonine-protein kinase, active site [IPR008271] (1) | -                               | -                           | P_trifoliata_00005_mRNA_138.1   |
| GF0043434 | 0                            | 0                        | 0                            | 1 Hypothetical protein (1)                               |                                                                                                                                                                                                                                                                                                                                                                                                                                                             |                                                                                                                                                                                                                                                                                                                                                                                             | -                               | -                           | P_trifoliata_00005_mRNA_134.1   |
| GF0043433 | 0                            | 0                        | 0                            | 1 Hypothetical protein (1)                               | terpene synthase activity [GO:0010333 molecular_function] (1); lyase activity [GO:0016829 molecular_function] (1); magnesium ion binding [GO:0000287 molecular_function] (1); metabolic process [GO:0008152 biological_process] (1)                                                                                                                                                                                                                         | Terpene synthase, N-terminal domain [IPR001900] (1); Terpene synthase, metal-binding domain [IPR056400] (1); Terpenoid cyclases/protein prenyltransferase alpha-alpha toroid [IPR009390] (1); Isoprenoid synthase domain [IPR008949] (1)                                                                                                                                                    | -                               | -                           | P_trifoliata_00005_mRNA_131.1   |
| GF0043432 | 0                            | 0                        | 0                            | 1 Hypothetical protein (1)                               |                                                                                                                                                                                                                                                                                                                                                                                                                                                             |                                                                                                                                                                                                                                                                                                                                                                                             | -                               | -                           | P_trifoliata_00005_mRNA_130.1   |
| GF0043431 | 0                            | 0                        | 0                            | 1 Hypothetical protein (1)                               | ATP binding [GO:0005524 molecular_function] (1)                                                                                                                                                                                                                                                                                                                                                                                                             | Protein kinase, ATP binding site [IPR017441] (1); Protein kinase-like domain [IPR011009] (1); Leucine-rich repeat 3 [IPR011713] (1)                                                                                                                                                                                                                                                         | -                               | -                           | P_trifoliata_00005_mRNA_129.1   |
| GF0043430 | 0                            | 0                        | 0                            | 1 Hypothetical protein (1)                               |                                                                                                                                                                                                                                                                                                                                                                                                                                                             |                                                                                                                                                                                                                                                                                                                                                                                             | -                               | -                           | P_trifoliata_00005_mRNA_127.1   |
| GF0043429 | 0                            | 0                        | 0                            | 1 Hypothetical protein (1)                               |                                                                                                                                                                                                                                                                                                                                                                                                                                                             |                                                                                                                                                                                                                                                                                                                                                                                             | -                               | -                           | P_trifoliata_00005_mRNA_125.1   |
| GF0043428 | 0                            | 0                        | 0                            | 1 Hypothetical protein (1)                               |                                                                                                                                                                                                                                                                                                                                                                                                                                                             |                                                                                                                                                                                                                                                                                                                                                                                             | -                               | -                           | P_trifoliata_00005_mRNA_124.1   |
| GF0043427 | 0                            | 0                        | 0                            | 1 Hypothetical protein (1)                               |                                                                                                                                                                                                                                                                                                                                                                                                                                                             |                                                                                                                                                                                                                                                                                                                                                                                             | -                               | -                           | P_trifoliata_00005_mRNA_122.1   |
| GF0043426 | 0                            | 0                        | 0                            | 1 Hypothetical protein (1)                               |                                                                                                                                                                                                                                                                                                                                                                                                                                                             |                                                                                                                                                                                                                                                                                                                                                                                             | -                               | -                           | P_trifoliata_00005_mRNA_12.1    |
| GF0043425 | 0                            | 0                        | 0                            | 1 Hypothetical protein (1)                               |                                                                                                                                                                                                                                                                                                                                                                                                                                                             |                                                                                                                                                                                                                                                                                                                                                                                             | -                               | -                           | P_trifoliata_00005_mRNA_119.1   |
| GF0043424 | 0                            | 0                        | 0                            | 1 Hypothetical protein (1)                               |                                                                                                                                                                                                                                                                                                                                                                                                                                                             |                                                                                                                                                                                                                                                                                                                                                                                             | -                               | -                           | P_trifoliata_00005_mRNA_117.1   |
| GF0043423 | 0                            | 0                        | 0                            | 1 Hypothetical protein (1)                               | hydrolase activity, acting on ester bonds [GO:0016788 molecular_function] (1)                                                                                                                                                                                                                                                                                                                                                                               | Harbinger transposase-derived protein [IPR006912] (1)                                                                                                                                                                                                                                                                                                                                       | -                               | -                           | P_trifoliata_00005_mRNA_115.1   |
| GF0043422 | 0                            | 0                        | 0                            | 1 Hypothetical protein (1)                               |                                                                                                                                                                                                                                                                                                                                                                                                                                                             |                                                                                                                                                                                                                                                                                                                                                                                             | -                               | -                           | P_trifoliata_00005_mRNA_113.1   |
| GF0043421 | 0                            | 0                        | 0                            | 1 Hypothetical protein (1)                               |                                                                                                                                                                                                                                                                                                                                                                                                                                                             |                                                                                                                                                                                                                                                                                                                                                                                             | -                               | -                           | P_trifoliata_00005_mRNA_103.1   |
| GF0043420 | 0                            | 0                        | 0                            | 1 Hypothetical protein (1)                               |                                                                                                                                                                                                                                                                                                                                                                                                                                                             |                                                                                                                                                                                                                                                                                                                                                                                             | -                               | -                           | P_trifoliata_00005_mRNA_101.1   |
| GF0043419 | 0                            | 0                        | 0                            | 1 Hypothetical protein (1)                               |                                                                                                                                                                                                                                                                                                                                                                                                                                                             |                                                                                                                                                                                                                                                                                                                                                                                             | -                               | -                           | P_trifoliata_00005_mRNA_100.1   |
| GF0043418 | 0                            | 0                        | 0                            | 1 Hypothetical protein (1)                               | transcription, DNA-templated [GO:0006351 biological_process] (1); DNA-directed RNA polymerase activity [GO:0003899 molecular_function] (1); DNA binding [GO:0000677 molecular_function] (1)                                                                                                                                                                                                                                                                 | RNA polymerase Rpb2, domain 2 [IPR007642] (1)                                                                                                                                                                                                                                                                                                                                               | -                               | -                           | P_trifoliata_00004_mRNA_95.1    |
| GF0043417 | 0                            | 0                        | 0                            | 1 Hypothetical protein (1)                               |                                                                                                                                                                                                                                                                                                                                                                                                                                                             |                                                                                                                                                                                                                                                                                                                                                                                             | -                               | -                           | P_trifoliata_00004_mRNA_92.1    |
| GF0043416 | 0                            | 0                        | 0                            | 1 Hypothetical protein (1)                               |                                                                                                                                                                                                                                                                                                                                                                                                                                                             | Protein kinase-like domain [IPR011009] (1); Concavallin A-like lectin/glucanase domain [IPR013320] (1)                                                                                                                                                                                                                                                                                      | -                               | -                           | P_trifoliata_00004_mRNA_67.1    |
| GF0043415 | 0                            | 0                        | 0                            | 1 E3 ubiquitin-protein ligase (1)                        | protein binding [GO:0005515 molecular_function] (1); zinc ion binding [GO:0008270 molecular_function] (1); ubiquitin-protein transferase activity [GO:0004842 molecular_function] (1); ubiquitin-dependent protein catabolic process [GO:0006511 biological_process] (1); multicellular organismal development [GO:0000725 biological_process] (1); protein ubiquitination [GO:0016567 biological_process] (1); nucleus [GO:0005634 cellular_component] (1) | SIAH-type domain [IPR013323] (1); Seven-in-absentia protein, TRAF-like domain [IPR018121] (1); TRAF-like domain [IPR008974] (1); E3 ubiquitin-protein ligase SIN-like [IPR004162] (1)                                                                                                                                                                                                       | -                               | -                           | P_trifoliata_00004_mRNA_63.1    |
| GF0043414 | 0                            | 0                        | 0                            | 1 Hypothetical protein (1)                               | protein binding [GO:0005515 molecular_function] (1); zinc ion binding [GO:0008270 molecular_function] (1)                                                                                                                                                                                                                                                                                                                                                   | Zinc finger, RINGFYVE/PHD-type [IPR013083] (1); Zinc finger, RING-type [IPR001841] (1)                                                                                                                                                                                                                                                                                                      | -                               | -                           | P_trifoliata_00004_mRNA_54.1    |
| GF0043413 | 0                            | 0                        | 0                            | 1 Hypothetical protein (1)                               |                                                                                                                                                                                                                                                                                                                                                                                                                                                             |                                                                                                                                                                                                                                                                                                                                                                                             | -                               | -                           | P_trifoliata_00004_mRNA_4.1     |
| GF0043412 | 0                            | 0                        | 0                            | 1 Hypothetical protein (1)                               |                                                                                                                                                                                                                                                                                                                                                                                                                                                             |                                                                                                                                                                                                                                                                                                                                                                                             | -                               | -                           | P_trifoliata_00004_mRNA_34.1    |
| GF0043411 | 0                            | 0                        | 0                            | 1 Hypothetical protein (1)                               |                                                                                                                                                                                                                                                                                                                                                                                                                                                             | Domain of unknown function DUF4782 [IPR031968] (1)                                                                                                                                                                                                                                                                                                                                          | -                               | -                           | P_trifoliata_00004_mRNA_3.1     |
| GF0043410 | 0                            | 0                        | 0                            | 1 Hypothetical protein (1)                               | oxidoreductase activity, acting on paired donors, with incorporation or reduction of molecular oxygen [GO:0016705 molecular_function] (1); oxidation-reduction process [GO:005514 biological_process] (1); iron ion binding [GO:0005506 molecular_function] (1); heme binding [GO:0020037 molecular_function] (1)                                                                                                                                           | Cytochrome P450, E-class, group I [IPR002401] (1); Cytochrome P450 [IPR001128] (1)                                                                                                                                                                                                                                                                                                          | -                               | -                           | P_trifoliata_00004_mRNA_190.1   |
| GF0043409 | 0                            | 0                        | 0                            | 1 Hypothetical protein (1)                               |                                                                                                                                                                                                                                                                                                                                                                                                                                                             |                                                                                                                                                                                                                                                                                                                                                                                             | -                               | -                           | P_trifoliata_00004_mRNA_178.1   |
| GF0043408 | 0                            | 0                        | 0                            | 1 Hypothetical protein (1)                               |                                                                                                                                                                                                                                                                                                                                                                                                                                                             |                                                                                                                                                                                                                                                                                                                                                                                             | -                               | -                           | P_trifoliata_00004_mRNA_175.1   |
| GF0043407 | 0                            | 0                        | 0                            | 1 Hypothetical protein (1)                               |                                                                                                                                                                                                                                                                                                                                                                                                                                                             |                                                                                                                                                                                                                                                                                                                                                                                             | -                               | -                           | P_trifoliata_00004_mRNA_174.1   |
| GF0043406 | 0                            | 0                        | 0                            | 1 Hypothetical protein (1)                               |                                                                                                                                                                                                                                                                                                                                                                                                                                                             |                                                                                                                                                                                                                                                                                                                                                                                             | -                               | -                           | P_trifoliata_00004_mRNA_17.1    |
| GF0043405 | 0                            | 0                        | 0                            | 1 Hypothetical protein (1)                               |                                                                                                                                                                                                                                                                                                                                                                                                                                                             | Protein of unknown function DUF594 [IPR007658] (1)                                                                                                                                                                                                                                                                                                                                          | -                               | -                           | P_trifoliata_00004_mRNA_169.1   |
| GF0043404 | 0                            | 0                        | 0                            | 1 Hypothetical protein (1)                               |                                                                                                                                                                                                                                                                                                                                                                                                                                                             |                                                                                                                                                                                                                                                                                                                                                                                             | -                               | -                           | P_trifoliata_00004_mRNA_167.1   |
| GF0043403 | 0                            | 0                        | 0                            | 1 Hypothetical protein (1)                               |                                                                                                                                                                                                                                                                                                                                                                                                                                                             |                                                                                                                                                                                                                                                                                                                                                                                             | -                               | -                           | P_trifoliata_00004_mRNA_166.1   |
| GF0043402 | 0                            | 0                        | 0                            | 1 Hypothetical protein (1)                               |                                                                                                                                                                                                                                                                                                                                                                                                                                                             |                                                                                                                                                                                                                                                                                                                                                                                             | -                               | -                           | P_trifoliata_00004_mRNA_165.1   |
| GF0043401 | 0                            | 0                        | 0                            | 1 Hypothetical protein (1)                               | regulation of transcription, DNA-templated [GO:0006355 biological_process] (1)                                                                                                                                                                                                                                                                                                                                                                              | Paired amphiphilic helix [IPR003822] (1)                                                                                                                                                                                                                                                                                                                                                    | -                               | -                           | P_trifoliata_00004_mRNA_164.1   |
| GF0043400 | 0                            | 0                        | 0                            | 1 Hypothetical protein (1)                               |                                                                                                                                                                                                                                                                                                                                                                                                                                                             |                                                                                                                                                                                                                                                                                                                                                                                             | -                               | -                           | P_trifoliata_00004_mRNA_161.1   |
| GF0043399 | 0                            | 0                        | 0                            | 1 Hypothetical protein (1)                               |                                                                                                                                                                                                                                                                                                                                                                                                                                                             | Mitochondrial carrier domain [IPR023395] (1); Mitochondrial substrate/solute carrier [IPR018108] (1)                                                                                                                                                                                                                                                                                        | -                               | -                           | P_trifoliata_00004_mRNA_158.1   |
| GF0043398 | 0                            | 0                        | 0                            | 1 Hypothetical protein (1)                               |                                                                                                                                                                                                                                                                                                                                                                                                                                                             |                                                                                                                                                                                                                                                                                                                                                                                             | -                               | -                           | P_trifoliata_00004_mRNA_153.1   |
| GF0043397 | 0                            | 0                        | 0                            | 1 Hypothetical protein (1)                               |                                                                                                                                                                                                                                                                                                                                                                                                                                                             | CwF19-like protein, C-terminal domain-2 [IPR006767] (1); CwF19-like, C-terminal domain-1 [IPR006768] (1)                                                                                                                                                                                                                                                                                    | -                               | -                           | P_trifoliata_00004_mRNA_152.1   |
| GF0043396 | 0                            | 0                        | 0                            | 1 CwF-like family protein, putative isoform 4 (1)        |                                                                                                                                                                                                                                                                                                                                                                                                                                                             |                                                                                                                                                                                                                                                                                                                                                                                             | -                               | -                           | P_trifoliata_00004_mRNA_150.1   |
| GF0043395 | 0                            | 0                        | 0                            | 1 Hypothetical protein (1)                               |                                                                                                                                                                                                                                                                                                                                                                                                                                                             |                                                                                                                                                                                                                                                                                                                                                                                             | -                               | -                           | P_trifoliata_00004_mRNA_149.1   |
| GF0043394 | 0                            | 0                        | 0                            | 1 Hypothetical protein (1)                               |                                                                                                                                                                                                                                                                                                                                                                                                                                                             |                                                                                                                                                                                                                                                                                                                                                                                             | -                               | -                           | P_trifoliata_00004_mRNA_148.1   |
| GF0043393 | 0                            | 0                        | 0                            | 1 Hypothetical protein (1)                               |                                                                                                                                                                                                                                                                                                                                                                                                                                                             |                                                                                                                                                                                                                                                                                                                                                                                             | -                               | -                           | P_trifoliata_00004_mRNA_145.1   |
| GF0043392 | 0                            | 0                        | 0                            | 1 Hypothetical protein (1)                               |                                                                                                                                                                                                                                                                                                                                                                                                                                                             |                                                                                                                                                                                                                                                                                                                                                                                             | -                               | -                           | P_trifoliata_00004_mRNA_144.1   |
| GF0043391 | 0                            | 0                        | 0                            | 1 Hypothetical protein (1)                               | response to wounding [GO:0009611 biological_process] (1); serine-type endopeptidase inhibitor activity [GO:0004867 molecular_function] (1)                                                                                                                                                                                                                                                                                                                  | Proteinase inhibitor I13, potato inhibitor 1 [IPR008064] (1)                                                                                                                                                                                                                                                                                                                                | -                               | -                           | P_trifoliata_00004_mRNA_143.1   |
| GF0043390 | 0                            | 0                        | 0                            | 1 Hypothetical protein (1)                               |                                                                                                                                                                                                                                                                                                                                                                                                                                                             |                                                                                                                                                                                                                                                                                                                                                                                             | -                               | -                           | P_trifoliata_00004_mRNA_140.1   |
| GF0043389 | 0                            | 0                        | 0                            | 1 Leucine-rich repeat receptor-like protein CLAVATA2 (1) | protein binding [GO:0005515 molecular_function] (1)                                                                                                                                                                                                                                                                                                                                                                                                         | Leucine-rich repeat-containing N-terminal, plant-type [IPR032101] (1); Leucine-rich repeat [IPR001611] (1); Leucine-rich repeat domain, L domain-like [IPR032675] (1)                                                                                                                                                                                                                       | -                               | -                           | P_trifoliata_00004_mRNA_139.1   |
| GF0043388 | 0                            | 0                        | 0                            | 1 Hypothetical protein (1)                               |                                                                                                                                                                                                                                                                                                                                                                                                                                                             |                                                                                                                                                                                                                                                                                                                                                                                             | -                               | -                           | P_trifoliata_00004_mRNA_135.1   |
| GF0043387 | 0                            | 0                        | 0                            | 1 Dormancy/auxin associated family protein (1)           |                                                                                                                                                                                                                                                                                                                                                                                                                                                             | Dormancy/auxin associated [IPR008406] (1)                                                                                                                                                                                                                                                                                                                                                   | -                               | -                           | P_trifoliata_00004_mRNA_126.1   |

| ID        | Num. in <i>C. clementiae</i> | Num. in <i>C. canthii</i> | Num. in <i>P. trifoliata</i> | Note                                                   | GO                                                                                                                                                                                                                                             | InterPro                                                                                                                                                                                                                                                                                                                                                          | Members in <i>C. clementiae</i> | Members in <i>C. canthii</i> | Members in <i>P. trifoliata</i> |
|-----------|------------------------------|---------------------------|------------------------------|--------------------------------------------------------|------------------------------------------------------------------------------------------------------------------------------------------------------------------------------------------------------------------------------------------------|-------------------------------------------------------------------------------------------------------------------------------------------------------------------------------------------------------------------------------------------------------------------------------------------------------------------------------------------------------------------|---------------------------------|------------------------------|---------------------------------|
| GF0043386 | 0                            | 0                         | 1                            | Hypothetical protein (1)                               |                                                                                                                                                                                                                                                | Rapid ALK/Alkalinization Factor [IPR008801] (1)                                                                                                                                                                                                                                                                                                                   | -                               | -                            | P_trifoliata_00004_mRNA_112.1   |
| GF0043385 | 0                            | 0                         | 1                            | Hypothetical protein (1)                               |                                                                                                                                                                                                                                                |                                                                                                                                                                                                                                                                                                                                                                   | -                               | -                            | P_trifoliata_00004_mRNA_109.1   |
| GF0043384 | 0                            | 0                         | 1                            | Hypothetical protein (1)                               |                                                                                                                                                                                                                                                |                                                                                                                                                                                                                                                                                                                                                                   | -                               | -                            | P_trifoliata_00004_mRNA_106.1   |
| GF0043383 | 0                            | 0                         | 1                            | Hypothetical protein (1)                               |                                                                                                                                                                                                                                                |                                                                                                                                                                                                                                                                                                                                                                   | -                               | -                            | P_trifoliata_00004_mRNA_1.1     |
| GF0043382 | 0                            | 0                         | 1                            | Hypothetical protein (1)                               |                                                                                                                                                                                                                                                | GAG-pre-integrase domain [IPR025724] (1)                                                                                                                                                                                                                                                                                                                          | -                               | -                            | P_trifoliata_00003_mRNA_89.1    |
| GF0043381 | 0                            | 0                         | 1                            | Hypothetical protein (1)                               |                                                                                                                                                                                                                                                |                                                                                                                                                                                                                                                                                                                                                                   | -                               | -                            | P_trifoliata_00003_mRNA_83.1    |
| GF0043380 | 0                            | 0                         | 1                            | Hypothetical protein (1)                               |                                                                                                                                                                                                                                                |                                                                                                                                                                                                                                                                                                                                                                   | -                               | -                            | P_trifoliata_00003_mRNA_81.1    |
| GF0043379 | 0                            | 0                         | 1                            | UDP-glycosyltransferase 89B1 (1)                       | metabolic process [GO:0008152 biological_process] (1); transferase activity, transferring hexosyl groups [GO:0016758 molecular_function] (1)                                                                                                   | UDP-glucuronosyl/UDP-glucosyltransferase [IPR002213] (1)                                                                                                                                                                                                                                                                                                          | -                               | -                            | P_trifoliata_00003_mRNA_68.1    |
| GF0043378 | 0                            | 0                         | 1                            | Hypothetical protein (1)                               |                                                                                                                                                                                                                                                |                                                                                                                                                                                                                                                                                                                                                                   | -                               | -                            | P_trifoliata_00003_mRNA_58.1    |
| GF0043377 | 0                            | 0                         | 1                            | Hypothetical protein (1)                               |                                                                                                                                                                                                                                                |                                                                                                                                                                                                                                                                                                                                                                   | -                               | -                            | P_trifoliata_00003_mRNA_56.1    |
| GF0043376 | 0                            | 0                         | 1                            | Hypothetical protein (1)                               |                                                                                                                                                                                                                                                |                                                                                                                                                                                                                                                                                                                                                                   | -                               | -                            | P_trifoliata_00003_mRNA_47.1    |
| GF0043375 | 0                            | 0                         | 1                            | Hypothetical protein (1)                               |                                                                                                                                                                                                                                                |                                                                                                                                                                                                                                                                                                                                                                   | -                               | -                            | P_trifoliata_00003_mRNA_44.1    |
| GF0043374 | 0                            | 0                         | 1                            | Hypothetical protein (1)                               |                                                                                                                                                                                                                                                |                                                                                                                                                                                                                                                                                                                                                                   | -                               | -                            | P_trifoliata_00003_mRNA_42.1    |
| GF0043373 | 0                            | 0                         | 1                            | Hypothetical protein (1)                               |                                                                                                                                                                                                                                                |                                                                                                                                                                                                                                                                                                                                                                   | -                               | -                            | P_trifoliata_00003_mRNA_39.1    |
| GF0043372 | 0                            | 0                         | 1                            | Hypothetical protein (1)                               |                                                                                                                                                                                                                                                |                                                                                                                                                                                                                                                                                                                                                                   | -                               | -                            | P_trifoliata_00003_mRNA_37.1    |
| GF0043371 | 0                            | 0                         | 1                            | Hypothetical protein (1)                               |                                                                                                                                                                                                                                                |                                                                                                                                                                                                                                                                                                                                                                   | -                               | -                            | P_trifoliata_00003_mRNA_32.1    |
| GF0043370 | 0                            | 0                         | 1                            | Hypothetical protein (1)                               |                                                                                                                                                                                                                                                |                                                                                                                                                                                                                                                                                                                                                                   | -                               | -                            | P_trifoliata_00003_mRNA_30.1    |
| GF0043369 | 0                            | 0                         | 1                            | Hypothetical protein (1)                               |                                                                                                                                                                                                                                                |                                                                                                                                                                                                                                                                                                                                                                   | -                               | -                            | P_trifoliata_00003_mRNA_29.1    |
| GF0043368 | 0                            | 0                         | 1                            | Hypothetical protein (1)                               |                                                                                                                                                                                                                                                |                                                                                                                                                                                                                                                                                                                                                                   | -                               | -                            | P_trifoliata_00003_mRNA_26.1    |
| GF0043367 | 0                            | 0                         | 1                            | Mitochondrial thiamine pyrophosphate carrier 1 (1)     |                                                                                                                                                                                                                                                | Mitochondrial carrier domain [IPR023395] (1); Mitochondrial substrate/solute carrier [IPR018108] (1)                                                                                                                                                                                                                                                              | -                               | -                            | P_trifoliata_00003_mRNA_25.1    |
| GF0043366 | 0                            | 0                         | 1                            | Solute carrier family 25 member 44 (1)                 |                                                                                                                                                                                                                                                | Repeat of unknown function XGLTT [IPR001661] (1); Mitochondrial substrate/solute carrier [IPR018108] (1); Mitochondrial carrier domain [IPR023395] (1)                                                                                                                                                                                                            | -                               | -                            | P_trifoliata_00003_mRNA_24.1    |
| GF0043365 | 0                            | 0                         | 1                            | Hypothetical protein (1)                               |                                                                                                                                                                                                                                                |                                                                                                                                                                                                                                                                                                                                                                   | -                               | -                            | P_trifoliata_00003_mRNA_23.1    |
| GF0043364 | 0                            | 0                         | 1                            | Hypothetical protein (1)                               |                                                                                                                                                                                                                                                |                                                                                                                                                                                                                                                                                                                                                                   | -                               | -                            | P_trifoliata_00003_mRNA_22.1    |
| GF0043363 | 0                            | 0                         | 1                            | Hypothetical protein (1)                               |                                                                                                                                                                                                                                                |                                                                                                                                                                                                                                                                                                                                                                   | -                               | -                            | P_trifoliata_00003_mRNA_21.1    |
| GF0043362 | 0                            | 0                         | 1                            | Hypothetical protein (1)                               |                                                                                                                                                                                                                                                |                                                                                                                                                                                                                                                                                                                                                                   | -                               | -                            | P_trifoliata_00003_mRNA_20.1    |
| GF0043361 | 0                            | 0                         | 1                            | Hypothetical protein (1)                               | protein binding [GO:0005515 molecular_function] (1)                                                                                                                                                                                            | Leucine-rich repeat domain, L domain-like [IPR02675] (1); Leucine-rich repeat, typical subtype [IPR035911] (1); Leucine-rich repeat [IPR001611] (1)                                                                                                                                                                                                               | -                               | -                            | P_trifoliata_00003_mRNA_193.1   |
| GF0043360 | 0                            | 0                         | 1                            | Hypothetical protein (1)                               | positive regulation of catalytic activity [GO:0043085 biological_process] (1); demethylation-dependent decapping of nuclear-transcribed mRNA [GO:000290 biological_process] (1); enzyme activator activity [GO:0008047 molecular_function] (1) | mRNA-decapping enzyme subunit 1 [IPR01034] (1); PH domain-like [IPR011993] (1)                                                                                                                                                                                                                                                                                    | -                               | -                            | P_trifoliata_00003_mRNA_192.1   |
| GF0043359 | 0                            | 0                         | 1                            | Hypothetical protein (1)                               |                                                                                                                                                                                                                                                |                                                                                                                                                                                                                                                                                                                                                                   | -                               | -                            | P_trifoliata_00003_mRNA_19.1    |
| GF0043358 | 0                            | 0                         | 1                            | Hypothetical protein (1)                               |                                                                                                                                                                                                                                                | Endonuclease/exonuclease/phosphatase [IPR005135] (1)                                                                                                                                                                                                                                                                                                              | -                               | -                            | P_trifoliata_00003_mRNA_168.1   |
| GF0043357 | 0                            | 0                         | 1                            | Hypothetical protein (1)                               |                                                                                                                                                                                                                                                |                                                                                                                                                                                                                                                                                                                                                                   | -                               | -                            | P_trifoliata_00003_mRNA_159.1   |
| GF0043356 | 0                            | 0                         | 1                            | Hypothetical protein (1)                               |                                                                                                                                                                                                                                                |                                                                                                                                                                                                                                                                                                                                                                   | -                               | -                            | P_trifoliata_00003_mRNA_155.1   |
| GF0043355 | 0                            | 0                         | 1                            | Hypothetical protein (1)                               |                                                                                                                                                                                                                                                |                                                                                                                                                                                                                                                                                                                                                                   | -                               | -                            | P_trifoliata_00003_mRNA_15.1    |
| GF0043354 | 0                            | 0                         | 1                            | Hypothetical protein (1)                               |                                                                                                                                                                                                                                                |                                                                                                                                                                                                                                                                                                                                                                   | -                               | -                            | P_trifoliata_00003_mRNA_149.1   |
| GF0043353 | 0                            | 0                         | 1                            | Hypothetical protein (1)                               |                                                                                                                                                                                                                                                |                                                                                                                                                                                                                                                                                                                                                                   | -                               | -                            | P_trifoliata_00003_mRNA_141.1   |
| GF0043352 | 0                            | 0                         | 1                            | Hypothetical protein (1)                               |                                                                                                                                                                                                                                                |                                                                                                                                                                                                                                                                                                                                                                   | -                               | -                            | P_trifoliata_00003_mRNA_14.1    |
| GF0043351 | 0                            | 0                         | 1                            | Disease resistance protein (1)                         | protein binding [GO:0005515 molecular_function] (1); ADP binding [GO:0043531 molecular_function] (1)                                                                                                                                           | Leucine-rich repeat domain, L domain-like [IPR02675] (1); NB-ARC [IPR002182] (1); Leucine-rich repeat [IPR001611] (1); P-loop containing nucleoside triphosphate hydrolase [IPR027417] (1)                                                                                                                                                                        | -                               | -                            | P_trifoliata_00003_mRNA_137.1   |
| GF0043350 | 0                            | 0                         | 1                            | Hypothetical protein (1)                               | regulation of transcription, DNA-templated [GO:0006355 biological_process] (1)                                                                                                                                                                 | FAR1 DNA binding domain [IPR044330] (1); FHY3/FAR1 family [IPR031052] (1)                                                                                                                                                                                                                                                                                         | -                               | -                            | P_trifoliata_00003_mRNA_136.1   |
| GF0043349 | 0                            | 0                         | 1                            | Hypothetical protein (1)                               |                                                                                                                                                                                                                                                | Endonuclease/exonuclease/phosphatase [IPR005135] (1)                                                                                                                                                                                                                                                                                                              | -                               | -                            | P_trifoliata_00003_mRNA_133.1   |
| GF0043348 | 0                            | 0                         | 1                            | Hypothetical protein (1)                               |                                                                                                                                                                                                                                                | Isopeptidase N synthase-like [IPR027443] (1); Protein kinase-like domain [IPR011009] (1); Concavalin A-like lectin/glucanase domain [IPR013200] (1); Domain of unknown function DUF1985 [IPR015410] (1); Protein kinase domain [IPR000719] (1); Serine/threonine/tyrosine-protein kinase domain [IPR001245] (1); Protein kinase, ATP binding site [IPR017441] (1) | -                               | -                            | P_trifoliata_00003_mRNA_126.1   |
| GF0043347 | 0                            | 0                         | 1                            | Hypothetical protein (1)                               | ATP binding [GO:0005524 molecular_function] (1); protein phosphorylation [GO:0006468 biological_process] (1); protein kinase activity [GO:0004672 molecular_function] (1)                                                                      |                                                                                                                                                                                                                                                                                                                                                                   | -                               | -                            | P_trifoliata_00003_mRNA_114.1   |
| GF0043346 | 0                            | 0                         | 1                            | Hypothetical protein (1)                               |                                                                                                                                                                                                                                                |                                                                                                                                                                                                                                                                                                                                                                   | -                               | -                            | P_trifoliata_00003_mRNA_105.1   |
| GF0043345 | 0                            | 0                         | 1                            | Hypothetical protein (1)                               |                                                                                                                                                                                                                                                |                                                                                                                                                                                                                                                                                                                                                                   | -                               | -                            | P_trifoliata_00003_mRNA_102.1   |
| GF0043344 | 0                            | 0                         | 1                            | Hypothetical protein (1)                               |                                                                                                                                                                                                                                                |                                                                                                                                                                                                                                                                                                                                                                   | -                               | -                            | P_trifoliata_00003_mRNA_1.1     |
| GF0043343 | 0                            | 0                         | 1                            | Protein pleiotropic regulatory locus 1 (1)             | protein binding [GO:0005515 molecular_function] (1)                                                                                                                                                                                            | G-protein beta WD-40 repeat [IPR020472] (1); WD40 repeat, conserved site [IPR019775] (1); WD40/YVTN repeat-like-containing domain [IPR015943] (1); WD40 repeat [IPR016801] (1); WD40 repeat-containing domain [IPR017986] (1)                                                                                                                                     | -                               | -                            | P_trifoliata_00002_mRNA_99.1    |
| GF0043342 | 0                            | 0                         | 1                            | Hypothetical protein (1)                               |                                                                                                                                                                                                                                                |                                                                                                                                                                                                                                                                                                                                                                   | -                               | -                            | P_trifoliata_00002_mRNA_90.1    |
| GF0043341 | 0                            | 0                         | 1                            | Hypothetical protein (1)                               |                                                                                                                                                                                                                                                |                                                                                                                                                                                                                                                                                                                                                                   | -                               | -                            | P_trifoliata_00002_mRNA_9.1     |
| GF0043340 | 0                            | 0                         | 1                            | DEAD-box ATP-dependent RNA helicase 20 (1)             | ATP binding [GO:0005524 molecular_function] (1); nucleic acid binding [GO:0003676 molecular_function] (1)                                                                                                                                      | Helicase, C-terminal [IPR001650] (1); P-loop containing nucleoside triphosphate hydrolase [IPR027417] (1); ATP-dependent RNA helicase DEAD-box, conserved site [IPR000629] (1); DEAD/DEAF box helicase domain [IPR01545] (1); Helicase superfamily 1/2, ATP-binding domain [IPR014001] (1); RNA helicase, DEAD-box type, Q motif [IPR014014] (1)                  | -                               | -                            | P_trifoliata_00002_mRNA_89.1    |
| GF0043339 | 0                            | 0                         | 1                            | Hypothetical protein (1)                               |                                                                                                                                                                                                                                                |                                                                                                                                                                                                                                                                                                                                                                   | -                               | -                            | P_trifoliata_00002_mRNA_8.1     |
| GF0043338 | 0                            | 0                         | 1                            | Hypothetical protein (1)                               |                                                                                                                                                                                                                                                |                                                                                                                                                                                                                                                                                                                                                                   | -                               | -                            | P_trifoliata_00002_mRNA_69.1    |
| GF0043337 | 0                            | 0                         | 1                            | Hypothetical protein (1)                               |                                                                                                                                                                                                                                                |                                                                                                                                                                                                                                                                                                                                                                   | -                               | -                            | P_trifoliata_00002_mRNA_68.1    |
| GF0043336 | 0                            | 0                         | 1                            | Hypothetical protein (1)                               |                                                                                                                                                                                                                                                |                                                                                                                                                                                                                                                                                                                                                                   | -                               | -                            | P_trifoliata_00002_mRNA_67.1    |
| GF0043335 | 0                            | 0                         | 1                            | Hypothetical protein (1)                               |                                                                                                                                                                                                                                                |                                                                                                                                                                                                                                                                                                                                                                   | -                               | -                            | P_trifoliata_00002_mRNA_66.1    |
| GF0043334 | 0                            | 0                         | 1                            | Hypothetical protein (1)                               |                                                                                                                                                                                                                                                |                                                                                                                                                                                                                                                                                                                                                                   | -                               | -                            | P_trifoliata_00002_mRNA_62.1    |
| GF0043333 | 0                            | 0                         | 1                            | Hypothetical protein (1)                               |                                                                                                                                                                                                                                                |                                                                                                                                                                                                                                                                                                                                                                   | -                               | -                            | P_trifoliata_00002_mRNA_57.1    |
| GF0043332 | 0                            | 0                         | 1                            | Pectolytic enzyme, Pectin lyase fold (1)               | carbohydrate metabolic process [GO:0005975 biological_process] (1); polygalacturonase activity [GO:0004650 molecular_function] (1)                                                                                                             | Pectin lyase fold [IPR012334] (1); Pectin lyase fold/virulence factor [IPR011050] (1); Glycoside hydrolase, family 28 [IPR000743] (1)                                                                                                                                                                                                                             | -                               | -                            | P_trifoliata_00002_mRNA_56.1    |
| GF0043331 | 0                            | 0                         | 1                            | Imidazole glycerol phosphate synthase subunit HisH (1) |                                                                                                                                                                                                                                                | Protein of unknown function DUF4602 [IPR027973] (1)                                                                                                                                                                                                                                                                                                               | -                               | -                            | P_trifoliata_00002_mRNA_41.1    |
| GF0043330 | 0                            | 0                         | 1                            | Hypothetical protein (1)                               |                                                                                                                                                                                                                                                |                                                                                                                                                                                                                                                                                                                                                                   | -                               | -                            | P_trifoliata_00002_mRNA_4.1     |
| GF0043329 | 0                            | 0                         | 1                            | Hypothetical protein (1)                               |                                                                                                                                                                                                                                                |                                                                                                                                                                                                                                                                                                                                                                   | -                               | -                            | P_trifoliata_00002_mRNA_33.1    |
| GF0043328 | 0                            | 0                         | 1                            | Ribosomal protein S4 (1)                               |                                                                                                                                                                                                                                                | Ribosomal protein S4-S9 [IPR022801] (1)                                                                                                                                                                                                                                                                                                                           | -                               | -                            | P_trifoliata_00002_mRNA_33.2    |
| GF0043327 | 0                            | 0                         | 1                            | Hypothetical protein (1)                               |                                                                                                                                                                                                                                                |                                                                                                                                                                                                                                                                                                                                                                   | -                               | -                            | P_trifoliata_00002_mRNA_31.1    |
| GF0043326 | 0                            | 0                         | 1                            | Hypothetical protein (1)                               |                                                                                                                                                                                                                                                |                                                                                                                                                                                                                                                                                                                                                                   | -                               | -                            | P_trifoliata_00002_mRNA_30.1    |
| GF0043325 | 0                            | 0                         | 1                            | Hypothetical protein (1)                               |                                                                                                                                                                                                                                                |                                                                                                                                                                                                                                                                                                                                                                   | -                               | -                            | P_trifoliata_00002_mRNA_28.1    |
| GF0043324 | 0                            | 0                         | 1                            | Hypothetical protein (1)                               |                                                                                                                                                                                                                                                | Leucine-rich repeat domain, L domain-like [IPR02675] (1)                                                                                                                                                                                                                                                                                                          | -                               | -                            | P_trifoliata_00002_mRNA_244.1   |
| GF0043323 | 0                            | 0                         | 1                            | Hypothetical protein (1)                               | regulation of transcription, DNA-templated [GO:0006355 biological_process] (1)                                                                                                                                                                 | FHY3/FAR1 family [IPR031052] (1); FAR1 DNA binding domain [IPR044330] (1); Reverse transcriptase zinc-binding domain [IPR025960] (1)                                                                                                                                                                                                                              | -                               | -                            | P_trifoliata_00002_mRNA_232.1   |
| GF0043322 | 0                            | 0                         | 1                            | Polygalacturonase (1)                                  | polygalacturonase activity [GO:0004650 molecular_function] (1); carbohydrate metabolic process [GO:0005975 biological_process] (1)                                                                                                             | Pectin lyase fold/virulence factor [IPR011050] (1); Pectin lyase fold [IPR012334] (1); Glycoside hydrolase, family 28 [IPR000743] (1)                                                                                                                                                                                                                             | -                               | -                            | P_trifoliata_00002_mRNA_228.1   |
| GF0043321 | 0                            | 0                         | 1                            | Hypothetical protein (1)                               |                                                                                                                                                                                                                                                |                                                                                                                                                                                                                                                                                                                                                                   | -                               | -                            | P_trifoliata_00002_mRNA_227.1   |
| GF0043320 | 0                            | 0                         | 1                            | Hypothetical protein (1)                               | transferase activity, transferring glycosyl groups [GO:0016757 molecular_function] (1); nucleic acid binding [GO:0003676 molecular_function] (1)                                                                                               | Glycosyl transferase, family 8 [IPR002495] (1); Ribonuclease H-like domain [IPR012337] (1); Nucleoside-diphosphate-sugar transferase [IPR029044] (1)                                                                                                                                                                                                              | -                               | -                            | P_trifoliata_00002_mRNA_220.1   |
| GF0043319 | 0                            | 0                         | 1                            | Hypothetical protein (1)                               |                                                                                                                                                                                                                                                |                                                                                                                                                                                                                                                                                                                                                                   | -                               | -                            | P_trifoliata_00002_mRNA_22.1    |
| GF0043318 | 0                            | 0                         | 1                            | Hypothetical protein (1)                               |                                                                                                                                                                                                                                                |                                                                                                                                                                                                                                                                                                                                                                   | -                               | -                            | P_trifoliata_00002_mRNA_21.1    |
| GF0043317 | 0                            | 0                         | 1                            | Hypothetical protein (1)                               |                                                                                                                                                                                                                                                |                                                                                                                                                                                                                                                                                                                                                                   | -                               | -                            | P_trifoliata_00002_mRNA_20.1    |

| ID        | Num. in <i>C. celanense</i> | Num. in <i>C. unshii</i> | Num. in <i>P. trifoliate</i> | Note                                                             | GO                                                                                                                                                                                                                                                                                                                                                                                                                                                      | InterPro                                                                                                                                                                                                                                                                                                                                         | Members in <i>C. celanense</i> | Members in <i>C. unshii</i> | Members in <i>P. trifoliate</i> |
|-----------|-----------------------------|--------------------------|------------------------------|------------------------------------------------------------------|---------------------------------------------------------------------------------------------------------------------------------------------------------------------------------------------------------------------------------------------------------------------------------------------------------------------------------------------------------------------------------------------------------------------------------------------------------|--------------------------------------------------------------------------------------------------------------------------------------------------------------------------------------------------------------------------------------------------------------------------------------------------------------------------------------------------|--------------------------------|-----------------------------|---------------------------------|
| GF004316  | 0                           | 0                        | 1                            | Hypothetical protein (1)                                         | oxidation-reduction process [GO:005114 biological_process] (1); peroxidase activity [GO:000461 molecular_function] (1); response to oxidative stress [GO:0006979 biological_process] (1); heme binding [GO:002037 molecular_function] (1)                                                                                                                                                                                                               | Plant peroxidase [IPRO00821] (1); Haem peroxidase, plant/fungal/bacterial [IPRO02015] (1); Haem peroxidase [IPRO10255] (1)                                                                                                                                                                                                                       | -                              | -                           | P_trifoliata_00002_mRNA_196.1   |
| GF0043315 | 0                           | 0                        | 1                            | Orf105b protein (1)                                              | -                                                                                                                                                                                                                                                                                                                                                                                                                                                       | -                                                                                                                                                                                                                                                                                                                                                | -                              | -                           | P_trifoliata_00002_mRNA_19.1    |
| GF0043314 | 0                           | 0                        | 1                            | Hypothetical protein (1)                                         | -                                                                                                                                                                                                                                                                                                                                                                                                                                                       | -                                                                                                                                                                                                                                                                                                                                                | -                              | -                           | P_trifoliata_00002_mRNA_187.1   |
| GF0043313 | 0                           | 0                        | 1                            | Hypothetical protein (1)                                         | -                                                                                                                                                                                                                                                                                                                                                                                                                                                       | -                                                                                                                                                                                                                                                                                                                                                | -                              | -                           | P_trifoliata_00002_mRNA_18.1    |
| GF0043312 | 0                           | 0                        | 1                            | Hypothetical protein (1)                                         | -                                                                                                                                                                                                                                                                                                                                                                                                                                                       | -                                                                                                                                                                                                                                                                                                                                                | -                              | -                           | P_trifoliata_00002_mRNA_17.1    |
| GF0043311 | 0                           | 0                        | 1                            | Serine/threonine-protein kinase PBS1 (1)                         | protein phosphorylation [GO:0006468 biological_process] (1); protein kinase activity [GO:0004672 molecular_function] (1); ATP binding [GO:0005524 molecular_function] (1)                                                                                                                                                                                                                                                                               | Protein kinase domain [IPRO00719] (1); Protein kinase-like domain [IPRO11009] (1); Concavalin A-like lectin/glucanase domain [IPRO13320] (1); Serine/threonine-protein kinase, active site [IPRO08271] (1); Protein kinase, ATP binding site [IPRO17441] (1); Serine/threonine/dual specificity protein kinase, catalytic domain [IPRO02290] (1) | -                              | -                           | P_trifoliata_00002_mRNA_159.1   |
| GF0043310 | 0                           | 0                        | 1                            | Hypothetical protein (1)                                         | -                                                                                                                                                                                                                                                                                                                                                                                                                                                       | -                                                                                                                                                                                                                                                                                                                                                | -                              | -                           | P_trifoliata_00002_mRNA_14.1    |
| GF0043309 | 0                           | 0                        | 1                            | Hypothetical protein (1)                                         | -                                                                                                                                                                                                                                                                                                                                                                                                                                                       | -                                                                                                                                                                                                                                                                                                                                                | -                              | -                           | P_trifoliata_00002_mRNA_134.1   |
| GF0043308 | 0                           | 0                        | 1                            | Hypothetical protein (1)                                         | -                                                                                                                                                                                                                                                                                                                                                                                                                                                       | -                                                                                                                                                                                                                                                                                                                                                | -                              | -                           | P_trifoliata_00002_mRNA_132.1   |
| GF0043307 | 0                           | 0                        | 1                            | Hypothetical protein (1)                                         | regulation of transcription, DNA-templated [GO:0006355 biological_process] (1)                                                                                                                                                                                                                                                                                                                                                                          | FHY3/FAR1 family [IPRO31052] (1); FAR1 DNA-binding domain [IPRO04330] (1)                                                                                                                                                                                                                                                                        | -                              | -                           | P_trifoliata_00002_mRNA_130.1   |
| GF0043306 | 0                           | 0                        | 1                            | Hypothetical protein (1)                                         | DNA binding [GO:0003677 molecular_function] (1)                                                                                                                                                                                                                                                                                                                                                                                                         | Myb domain [IPRO17930] (1); Homeodomain-like [IPRO09571] (1); SANT/Myb domain [IPRO10055] (1)                                                                                                                                                                                                                                                    | -                              | -                           | P_trifoliata_00002_mRNA_12.1    |
| GF0043305 | 0                           | 0                        | 1                            | Hypothetical protein (1)                                         | -                                                                                                                                                                                                                                                                                                                                                                                                                                                       | -                                                                                                                                                                                                                                                                                                                                                | -                              | -                           | P_trifoliata_00002_mRNA_11.1    |
| GF0043304 | 0                           | 0                        | 1                            | Hypothetical protein (1)                                         | -                                                                                                                                                                                                                                                                                                                                                                                                                                                       | -                                                                                                                                                                                                                                                                                                                                                | -                              | -                           | P_trifoliata_00002_mRNA_102.1   |
| GF0043303 | 0                           | 0                        | 1                            | Hypothetical protein (1)                                         | nucleic acid binding [GO:0003676 molecular_function] (1)                                                                                                                                                                                                                                                                                                                                                                                                | Ribonuclease H-like domain [IPRO12337] (1)                                                                                                                                                                                                                                                                                                       | -                              | -                           | P_trifoliata_00002_mRNA_10.1    |
| GF0043302 | 0                           | 0                        | 1                            | Hypothetical protein (1)                                         | -                                                                                                                                                                                                                                                                                                                                                                                                                                                       | -                                                                                                                                                                                                                                                                                                                                                | -                              | -                           | P_trifoliata_00002_mRNA_1.1     |
| GF0043301 | 0                           | 0                        | 1                            | Hypothetical protein (1)                                         | nucleotide binding [GO:000166 molecular_function] (1); metal ion binding [GO:0046872 molecular_function] (1)                                                                                                                                                                                                                                                                                                                                            | P-type ATPase, A domain [IPRO08250] (1)                                                                                                                                                                                                                                                                                                          | -                              | -                           | P_trifoliata_00001_mRNA_83.1    |
| GF0043300 | 0                           | 0                        | 1                            | P-type ATPase superfamily (1)                                    | nucleotide binding [GO:000166 molecular_function] (1); metal ion binding [GO:0046872 molecular_function] (1); integral component of membrane [GO:0016021 cellular_component] (1)                                                                                                                                                                                                                                                                        | P-type ATPase, A domain [IPRO08250] (1); HAD-like domain [IPRO32141] (1); P-type ATPase [IPRO01757] (1); P-type ATPase, cytoplasmic domain N [IPRO25289] (1)                                                                                                                                                                                     | -                              | -                           | P_trifoliata_00001_mRNA_82.1    |
| GF0043299 | 0                           | 0                        | 1                            | Theta class glutathione S-transferase (1)                        | protein binding [GO:0005515 molecular_function] (1)                                                                                                                                                                                                                                                                                                                                                                                                     | Glutathione S-transferase, N-terminal [IPRO04045] (1); Glutathione S-transferase, C-terminal-like [IPRO10987] (1); Thioredoxin-like fold [IPRO12336] (1)                                                                                                                                                                                         | -                              | -                           | P_trifoliata_00001_mRNA_81.1    |
| GF0043298 | 0                           | 0                        | 1                            | Theta class glutathione S-transferase (1)                        | protein binding [GO:0005515 molecular_function] (1)                                                                                                                                                                                                                                                                                                                                                                                                     | Glutathione S-transferase, C-terminal [IPRO04046] (1); Thioredoxin-like fold [IPRO12336] (1); Glutathione S-transferase, N-terminal [IPRO04045] (1); Glutathione S-transferase, C-terminal-like [IPRO10987] (1)                                                                                                                                  | -                              | -                           | P_trifoliata_00001_mRNA_80.1    |
| GF0043297 | 0                           | 0                        | 1                            | Xyloglucan galactosyltransferase KATAMARI (1)                    | -                                                                                                                                                                                                                                                                                                                                                                                                                                                       | Exostosin-like [IPRO04263] (1)                                                                                                                                                                                                                                                                                                                   | -                              | -                           | P_trifoliata_00001_mRNA_78.1    |
| GF0043296 | 0                           | 0                        | 1                            | Probable phospholipid hydroperoxidase glutathione peroxidase (1) | glutathione peroxidase activity [GO:0004602 molecular_function] (1); response to oxidative stress [GO:0006979 biological_process] (1); oxidation-reduction process [GO:005114 biological_process] (1)                                                                                                                                                                                                                                                   | Glutathione peroxidase [IPRO08889] (1); Thioredoxin-like fold [IPRO12336] (1); Glutathione peroxidase conserved site [IPRO29760] (1); Glutathione peroxidase active site [IPRO29759] (1)                                                                                                                                                         | -                              | -                           | P_trifoliata_00001_mRNA_77.1    |
| GF0043295 | 0                           | 0                        | 1                            | Protein kinase protein with tetrapeptide repeat domain (1)       | ATP binding [GO:0005524 molecular_function] (1); protein phosphorylation [GO:0006468 biological_process] (1); protein kinase activity [GO:0004672 molecular_function] (1)                                                                                                                                                                                                                                                                               | Protein kinase-like domain [IPRO11009] (1); Protein kinase domain [IPRO00719] (1); Serine/threonine/tyrosine-protein kinase catalytic domain [IPRO01245] (1)                                                                                                                                                                                     | -                              | -                           | P_trifoliata_00001_mRNA_75.1    |
| GF0043294 | 0                           | 0                        | 1                            | Pollen-specific protein SF3 (1)                                  | zinc ion binding [GO:0008270 molecular_function] (1)                                                                                                                                                                                                                                                                                                                                                                                                    | Zinc finger, LIM-type [IPRO01781] (1)                                                                                                                                                                                                                                                                                                            | -                              | -                           | P_trifoliata_00001_mRNA_74.1    |
| GF0043293 | 0                           | 0                        | 1                            | Hypothetical protein (1)                                         | -                                                                                                                                                                                                                                                                                                                                                                                                                                                       | -                                                                                                                                                                                                                                                                                                                                                | -                              | -                           | P_trifoliata_00001_mRNA_55.1    |
| GF0043292 | 0                           | 0                        | 1                            | Hypothetical protein (1)                                         | -                                                                                                                                                                                                                                                                                                                                                                                                                                                       | -                                                                                                                                                                                                                                                                                                                                                | -                              | -                           | P_trifoliata_00001_mRNA_30.1    |
| GF0043291 | 0                           | 0                        | 1                            | Hypothetical protein (1)                                         | -                                                                                                                                                                                                                                                                                                                                                                                                                                                       | -                                                                                                                                                                                                                                                                                                                                                | -                              | -                           | P_trifoliata_00001_mRNA_279.1   |
| GF0043290 | 0                           | 0                        | 1                            | Hypothetical protein (1)                                         | -                                                                                                                                                                                                                                                                                                                                                                                                                                                       | -                                                                                                                                                                                                                                                                                                                                                | -                              | -                           | P_trifoliata_00001_mRNA_244.1   |
| GF0043289 | 0                           | 0                        | 1                            | Hypothetical protein (1)                                         | membrane [GO:0016020 cellular_component] (1); transferase activity, transferring acyl groups other than amino-acyl groups [GO:0016747 molecular_function] (1); fatty acid biosynthetic process [GO:0006633 biological_process] (1)                                                                                                                                                                                                                      | Very-long-chain 3-ketoacyl-CoA synthase [IPRO12392] (1); FAE1/Type III polyketide synthase-like protein [IPRO13601] (1)                                                                                                                                                                                                                          | -                              | -                           | P_trifoliata_00001_mRNA_242.1   |
| GF0043288 | 0                           | 0                        | 1                            | Hypothetical protein (1)                                         | protein kinase activity [GO:0004672 molecular_function] (1); protein phosphorylation [GO:0006468 biological_process] (1); ATP binding [GO:0005524 molecular_function] (1)                                                                                                                                                                                                                                                                               | Serine/threonine/tyrosine-protein kinase catalytic domain [IPRO01245] (1); Protein kinase domain [IPRO00719] (1); Protein kinase-like domain [IPRO11009] (1)                                                                                                                                                                                     | -                              | -                           | P_trifoliata_00001_mRNA_240.1   |
| GF0043287 | 0                           | 0                        | 1                            | Hypothetical protein (1)                                         | -                                                                                                                                                                                                                                                                                                                                                                                                                                                       | -                                                                                                                                                                                                                                                                                                                                                | -                              | -                           | P_trifoliata_00001_mRNA_238.1   |
| GF0043286 | 0                           | 0                        | 1                            | Hypothetical protein (1)                                         | -                                                                                                                                                                                                                                                                                                                                                                                                                                                       | -                                                                                                                                                                                                                                                                                                                                                | -                              | -                           | P_trifoliata_00001_mRNA_234.1   |
| GF0043285 | 0                           | 0                        | 1                            | Hypothetical protein (1)                                         | serine-type carboxypeptidase activity [GO:000185 molecular_function] (1); proteolysis [GO:0006508 biological_process] (1)                                                                                                                                                                                                                                                                                                                               | Alpha/Beta hydrolase fold [IPRO29058] (1); Peptidase S10, serine carboxypeptidase [IPRO1563] (1)                                                                                                                                                                                                                                                 | -                              | -                           | P_trifoliata_00001_mRNA_227.1   |
| GF0043284 | 0                           | 0                        | 1                            | Hypothetical protein (1)                                         | methionine biosynthetic process [GO:0009086 biological_process] (1); zinc ion binding [GO:0008270 molecular_function] (1); 5-methyltetrahydropterin/triglutamate-homocysteine S-methyltransferase activity [GO:0003871 molecular_function] (1)                                                                                                                                                                                                          | Cobalamin-independent methionine synthase MetE, C-terminal/archaeal [IPRO02629] (1)                                                                                                                                                                                                                                                              | -                              | -                           | P_trifoliata_00001_mRNA_226.1   |
| GF0043283 | 0                           | 0                        | 1                            | Hypothetical protein (1)                                         | nucleic acid binding [GO:0003676 molecular_function] (1)                                                                                                                                                                                                                                                                                                                                                                                                | Ribonuclease H-like domain [IPRO12337] (1); Pwi domain [IPRO01653] (1)                                                                                                                                                                                                                                                                           | -                              | -                           | P_trifoliata_00001_mRNA_217.1   |
| GF0043282 | 0                           | 0                        | 1                            | Early nodulin-like protein 20 (1)                                | electron carrier activity [GO:0009055 molecular_function] (1)                                                                                                                                                                                                                                                                                                                                                                                           | Phytochrome domain [IPRO03245] (1); Cupredoxin [IPRO08972] (1)                                                                                                                                                                                                                                                                                   | -                              | -                           | P_trifoliata_00001_mRNA_216.1   |
| GF0043281 | 0                           | 0                        | 1                            | Hypothetical protein (1)                                         | -                                                                                                                                                                                                                                                                                                                                                                                                                                                       | -                                                                                                                                                                                                                                                                                                                                                | -                              | -                           | P_trifoliata_00001_mRNA_208.1   |
| GF0043280 | 0                           | 0                        | 1                            | Hypothetical protein (1)                                         | -                                                                                                                                                                                                                                                                                                                                                                                                                                                       | -                                                                                                                                                                                                                                                                                                                                                | -                              | -                           | P_trifoliata_00001_mRNA_205.1   |
| GF0043279 | 0                           | 0                        | 1                            | Hypothetical protein (1)                                         | cysteine-type peptidase activity [GO:0008234 molecular_function] (1); proteolysis [GO:0006508 biological_process] (1)                                                                                                                                                                                                                                                                                                                                   | Ulp1 protease family, C-terminal catalytic domain [IPRO3653] (1)                                                                                                                                                                                                                                                                                 | -                              | -                           | P_trifoliata_00001_mRNA_203.1   |
| GF0043278 | 0                           | 0                        | 1                            | Hypothetical protein (1)                                         | -                                                                                                                                                                                                                                                                                                                                                                                                                                                       | -                                                                                                                                                                                                                                                                                                                                                | -                              | -                           | P_trifoliata_00001_mRNA_201.1   |
| GF0043277 | 0                           | 0                        | 1                            | Hypothetical protein (1)                                         | -                                                                                                                                                                                                                                                                                                                                                                                                                                                       | -                                                                                                                                                                                                                                                                                                                                                | -                              | -                           | P_trifoliata_00001_mRNA_190.1   |
| GF0043276 | 0                           | 0                        | 1                            | Hypothetical protein (1)                                         | -                                                                                                                                                                                                                                                                                                                                                                                                                                                       | -                                                                                                                                                                                                                                                                                                                                                | -                              | -                           | P_trifoliata_00001_mRNA_19.1    |
| GF0043275 | 0                           | 0                        | 1                            | Multidrug resistance protein ABC transporter family protein (1)  | ATPase activity, coupled to transmembrane movement of substances [GO:0042626 molecular_function] (1); transmembrane transport [GO:0055085 biological_process] (1); ATP binding [GO:0005524 molecular_function] (1); ATPase activity [GO:0016887 molecular_function] (1); integral component of membrane [GO:0016021 cellular_component] (1); transport [GO:0006810 biological_process] (1)                                                              | ABC transporter, conserved site [IPRO1787] (1); AAA+ ATPase domain [IPRO03393] (1); ABC transporter type 1, transmembrane domain [IPRO1527] (1); ABC transporter-like [IPRO03439] (1); P-loop containing nucleoside triphosphate hydrolase [IPRO27417] (1)                                                                                       | -                              | -                           | P_trifoliata_00001_mRNA_189.1   |
| GF0043274 | 0                           | 0                        | 1                            | Hypothetical protein (1)                                         | translational initiation [GO:0006413 biological_process] (1); integral component of membrane [GO:0016021 cellular_component] (1); cation transport [GO:0006812 biological_process] (1); transmembrane transport [GO:0055085 biological_process] (1); translation initiation factor activity [GO:0003743 molecular_function] (1); solute/proton antiporter activity [GO:0015399 molecular_function] (1); RNA binding [GO:0003723 molecular_function] (1) | Translation initiation factor IF-1 [IPRO04368] (1); Nucleic acid-binding, OB-fold [IPRO12340] (1); RNA-binding domain, S1, IF1 type [IPRO06196] (1); Cation/H+ exchanger [IPRO06153] (1); RNA-binding domain, S1 [IPRO22967] (1)                                                                                                                 | -                              | -                           | P_trifoliata_00001_mRNA_182.1   |
| GF0043273 | 0                           | 0                        | 1                            | Hypothetical protein (1)                                         | -                                                                                                                                                                                                                                                                                                                                                                                                                                                       | -                                                                                                                                                                                                                                                                                                                                                | -                              | -                           | P_trifoliata_00001_mRNA_177.1   |
| GF0043272 | 0                           | 0                        | 1                            | Hypothetical protein (1)                                         | -                                                                                                                                                                                                                                                                                                                                                                                                                                                       | -                                                                                                                                                                                                                                                                                                                                                | -                              | -                           | P_trifoliata_00001_mRNA_131.1   |
| GF0043271 | 0                           | 0                        | 1                            | Hypothetical protein (1)                                         | -                                                                                                                                                                                                                                                                                                                                                                                                                                                       | -                                                                                                                                                                                                                                                                                                                                                | -                              | -                           | P_trifoliata_00001_mRNA_123.1   |
| GF0043270 | 0                           | 0                        | 1                            | Hypothetical protein (1)                                         | -                                                                                                                                                                                                                                                                                                                                                                                                                                                       | -                                                                                                                                                                                                                                                                                                                                                | -                              | -                           | P_trifoliata_00001_mRNA_122.1   |
| GF0043269 | 0                           | 0                        | 1                            | Hypothetical protein (1)                                         | -                                                                                                                                                                                                                                                                                                                                                                                                                                                       | -                                                                                                                                                                                                                                                                                                                                                | -                              | -                           | P_trifoliata_00001_mRNA_12.1    |
| GF0043268 | 0                           | 0                        | 1                            | Hypothetical protein (1)                                         | -                                                                                                                                                                                                                                                                                                                                                                                                                                                       | -                                                                                                                                                                                                                                                                                                                                                | -                              | -                           | P_trifoliata_00001_mRNA_107.1   |
| GF0043267 | 0                           | 0                        | 1                            | Hypothetical protein (1)                                         | -                                                                                                                                                                                                                                                                                                                                                                                                                                                       | -                                                                                                                                                                                                                                                                                                                                                | -                              | -                           | P_trifoliata_00001_mRNA_102.1   |
| GF0043266 | 0                           | 0                        | 1                            | TSA: Wollemia nobilis transcribed RNA sequence (1)               | -                                                                                                                                                                                                                                                                                                                                                                                                                                                       | Protein of unknown function DJF2039 [IPRO19351] (1); YgfJ-like [IPRO29037] (1)                                                                                                                                                                                                                                                                   | -                              | -                           | P_trifoliata_00001_mRNA_1.1     |
